# Supplementary material for: Assessing the utility of COVID-19 case reports as a leading indicator for hospitalization forecasting in the United States
Source: bioRxiv or medRxiv preprint supplement (doi:10.1101/2023.03.08.23286582), 2023-03-10

California case data as of: 2021-04-26

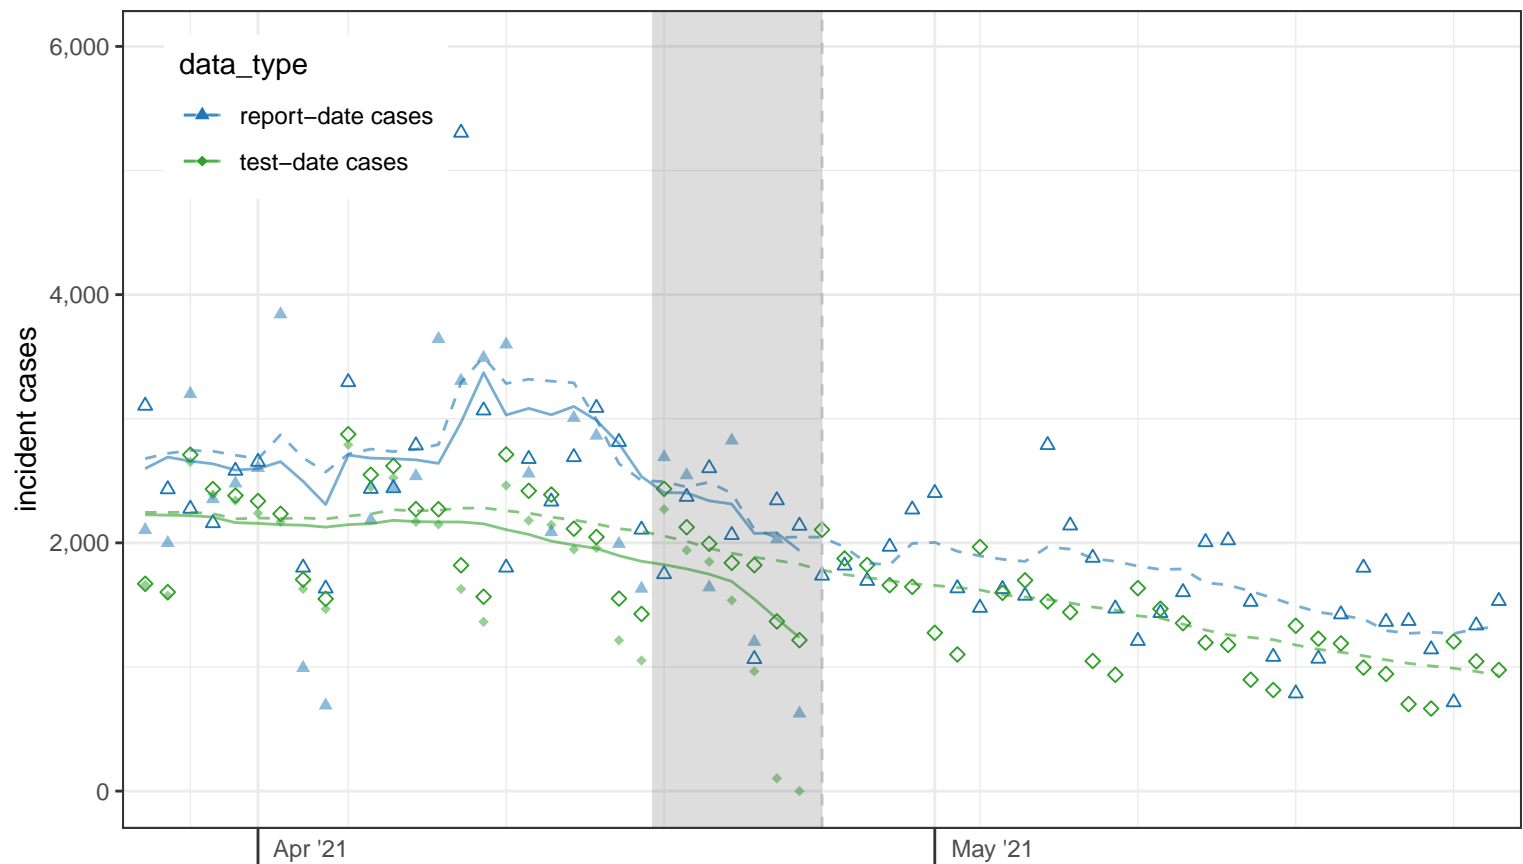

California case data as of: 2021-05-03

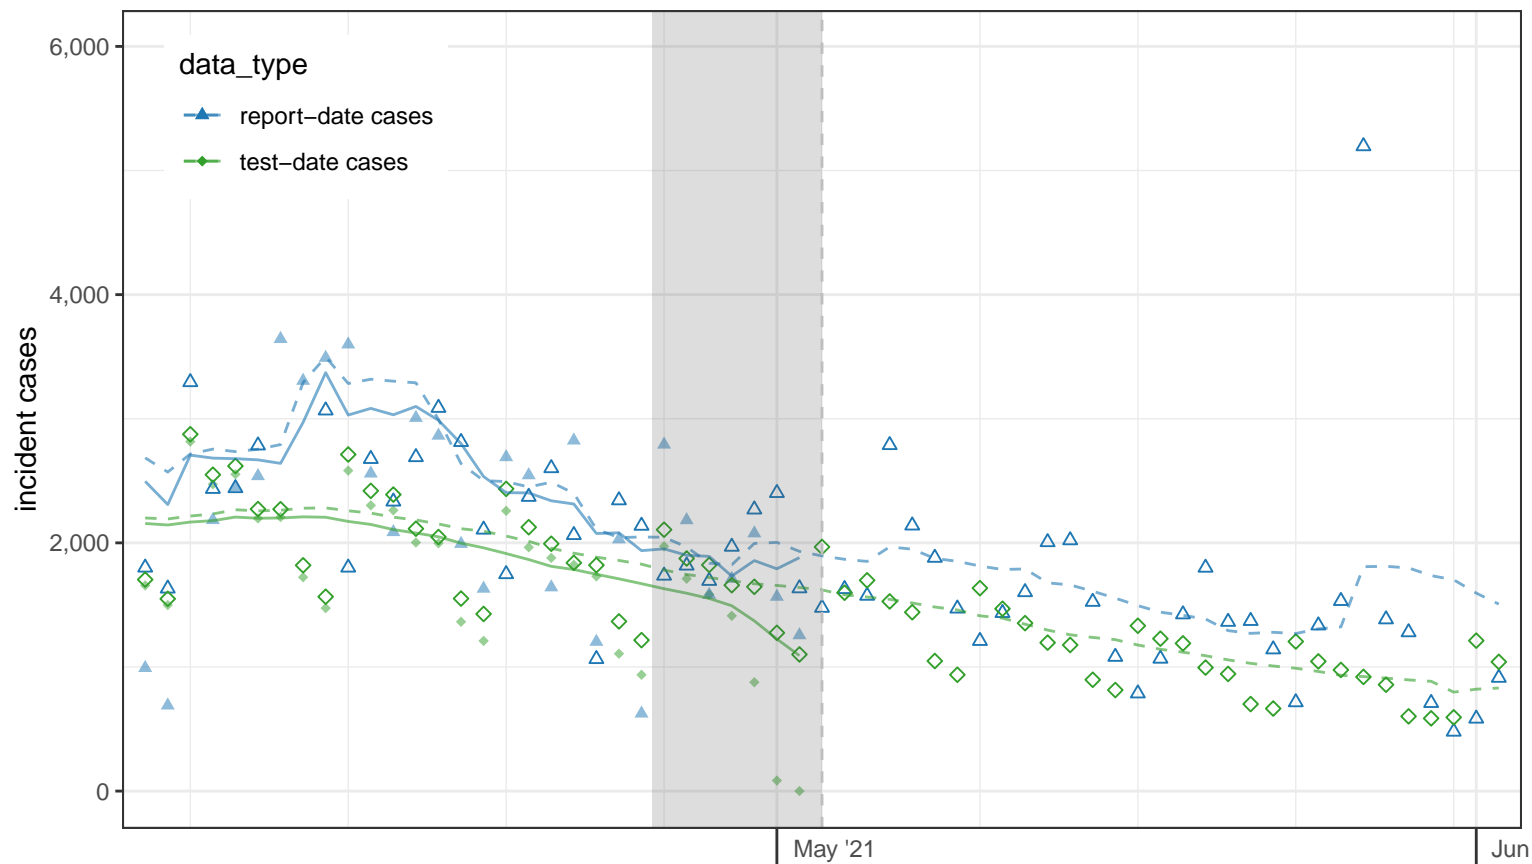

California case data as of: 2021-05-10

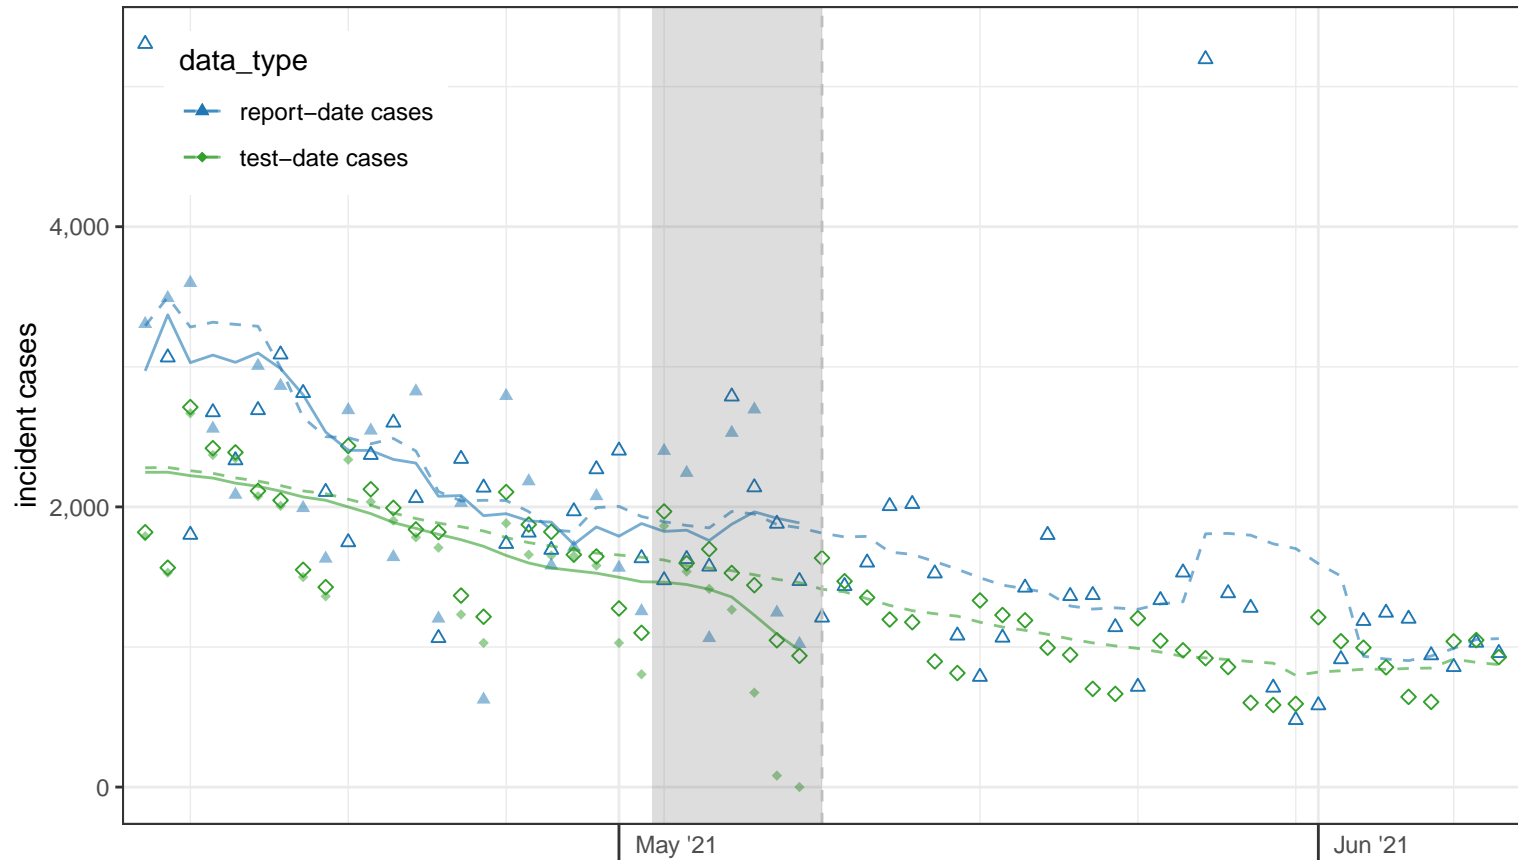

California case data as of: 2021-05-17

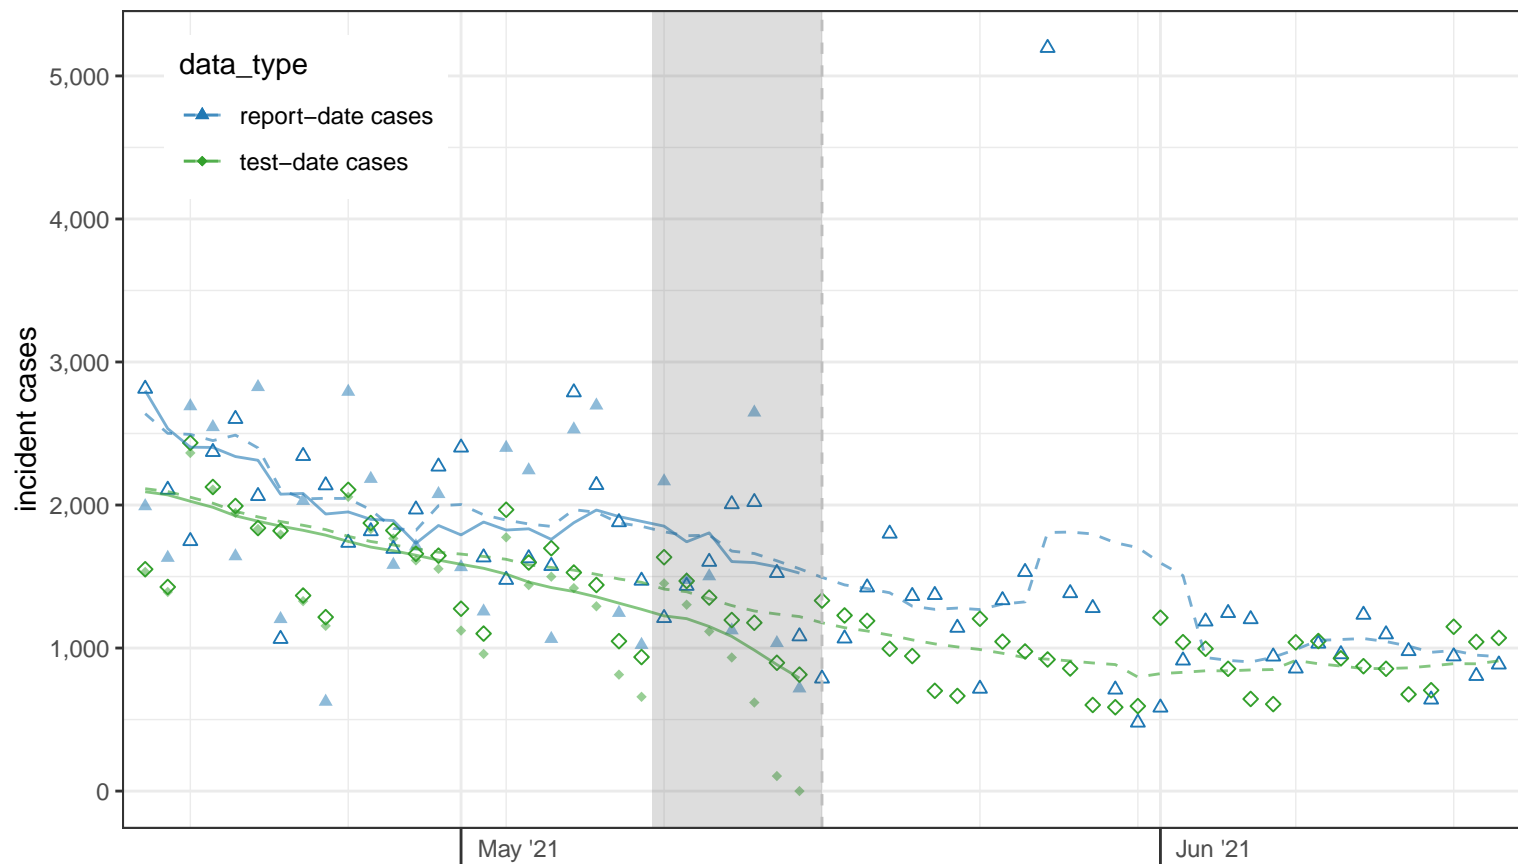

California case data as of: 2021-05-24

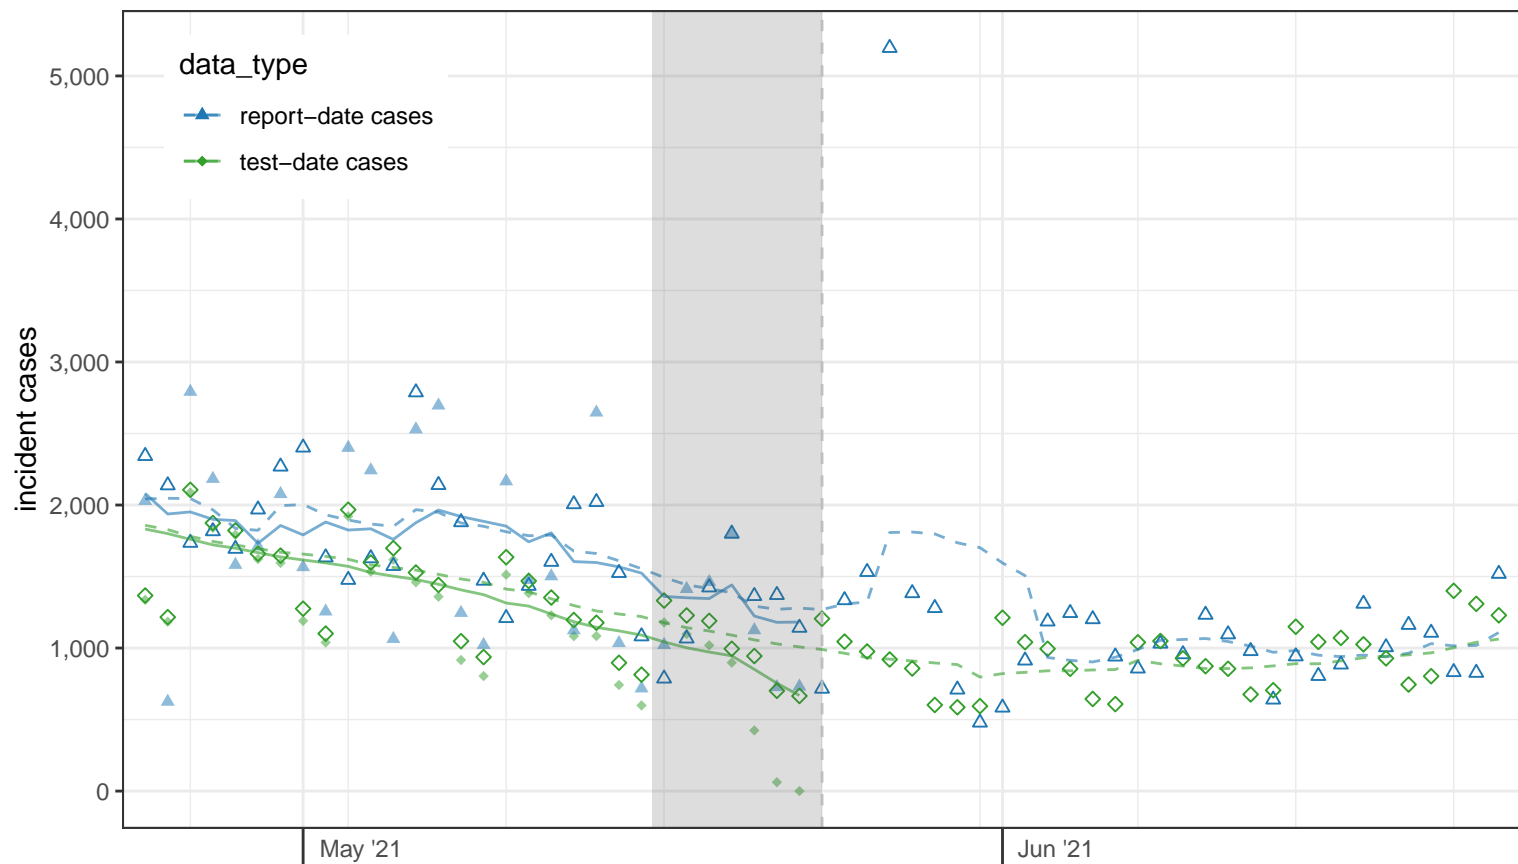

California case data as of: 2021-05-31

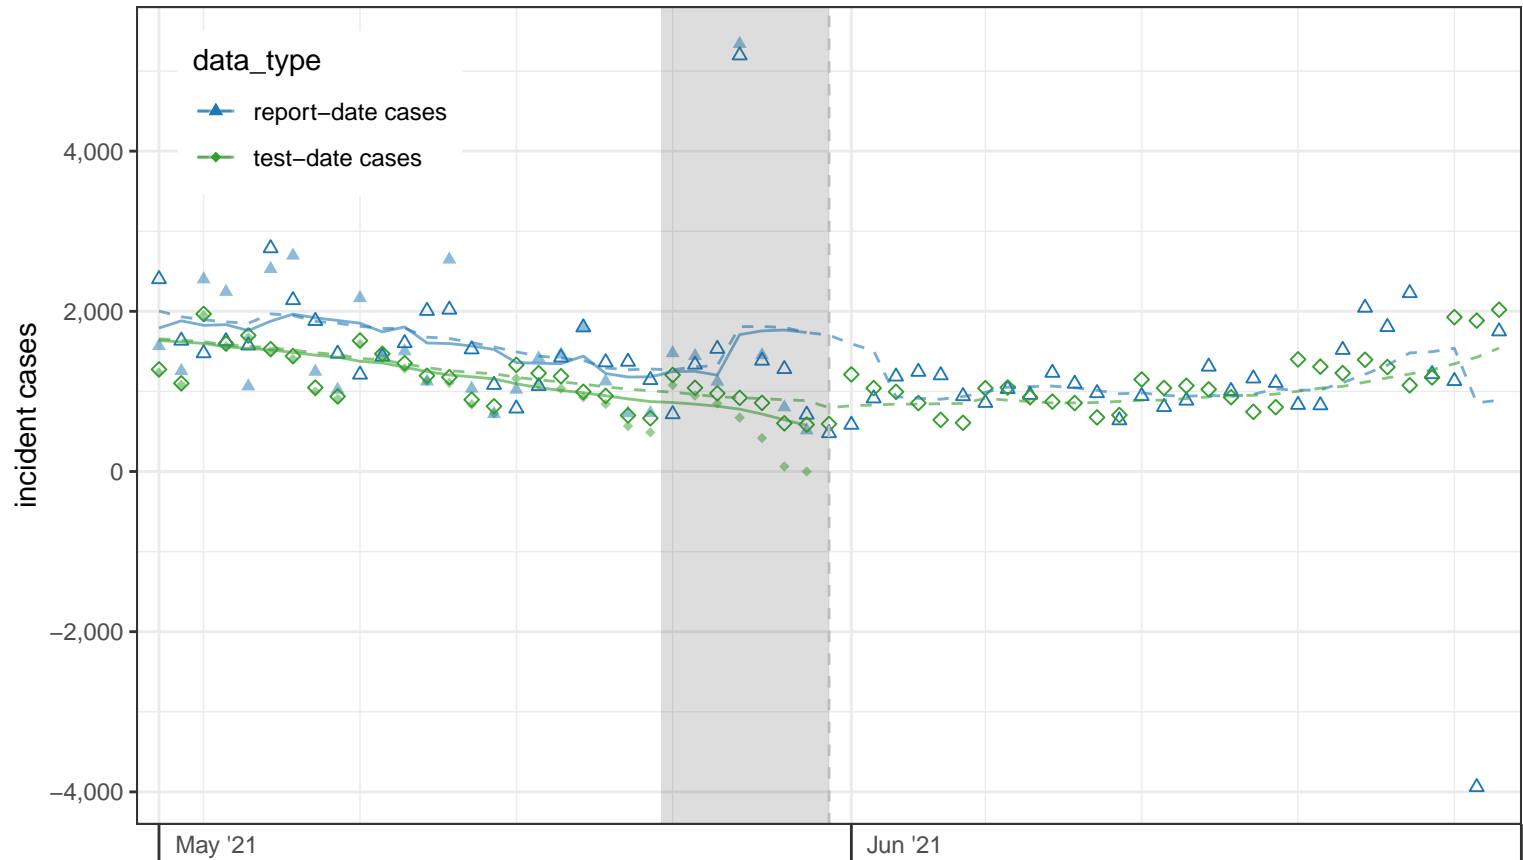

California case data as of: 2021-06-07

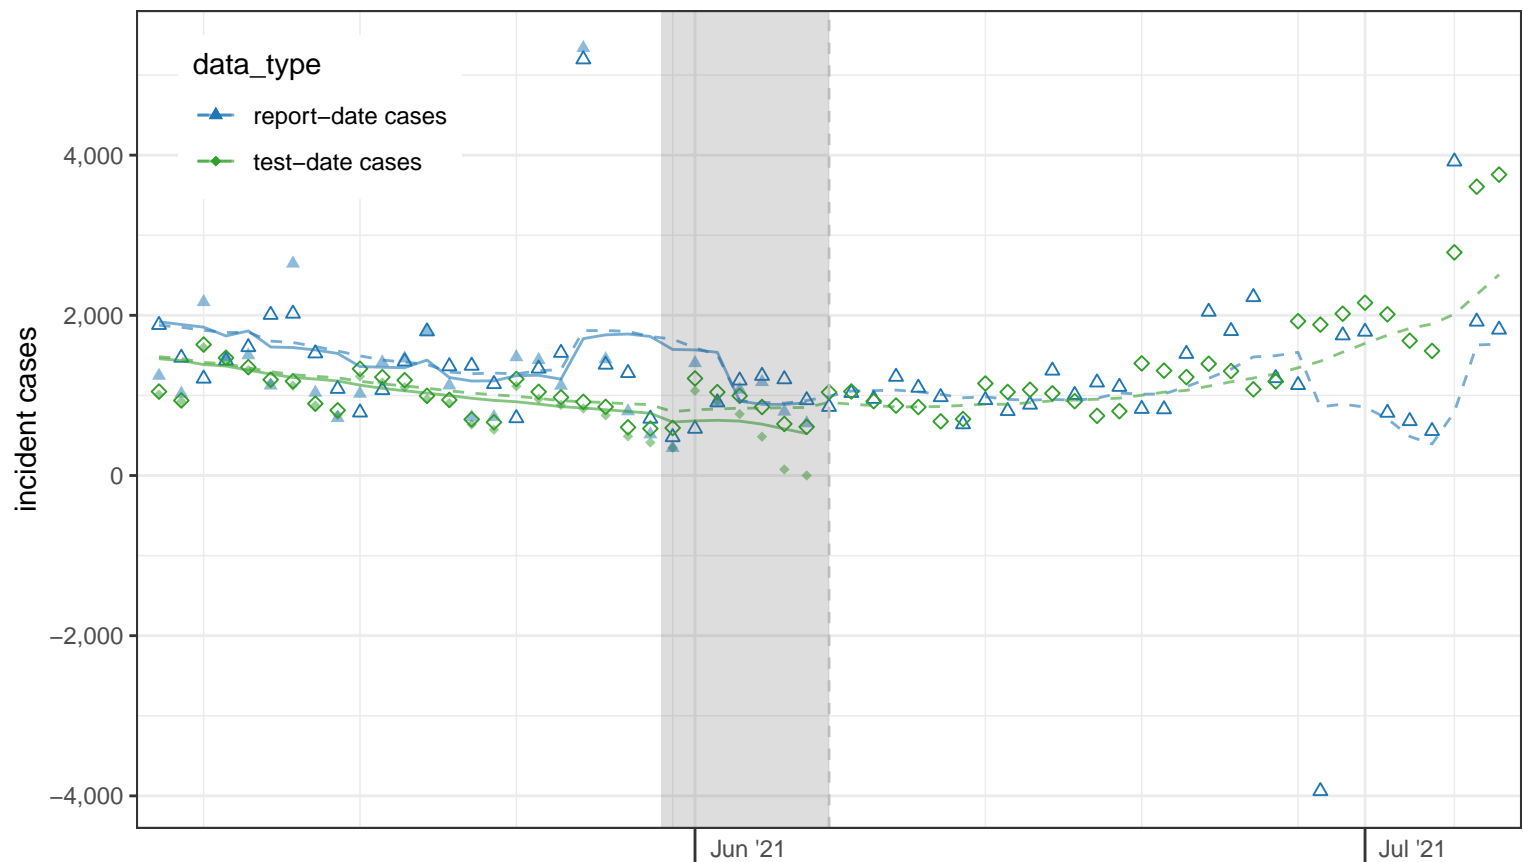

California case data as of: 2021-06-14

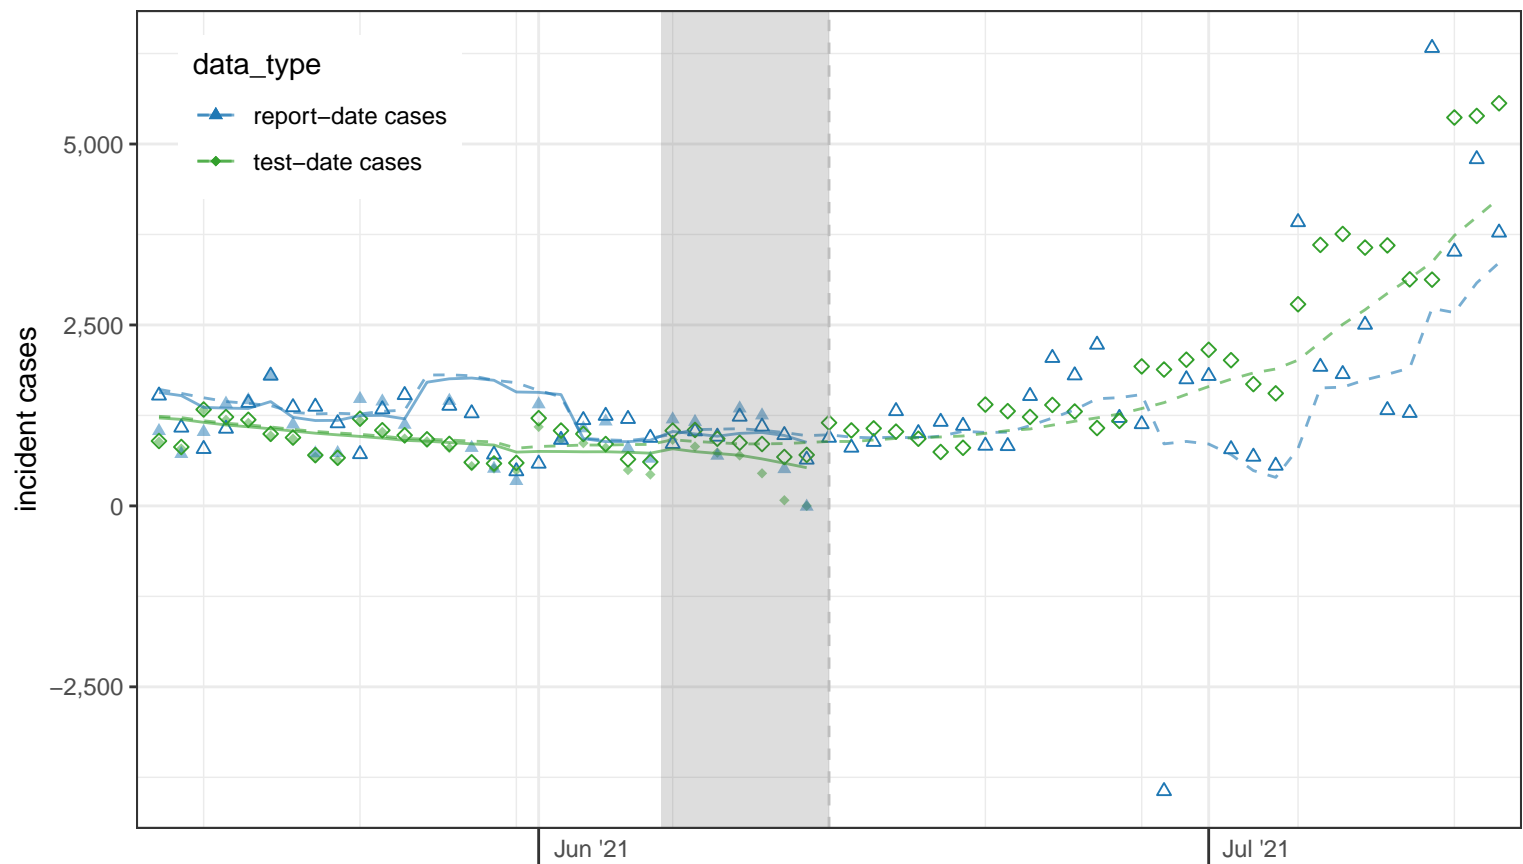



California case data as of: 2021-06-21

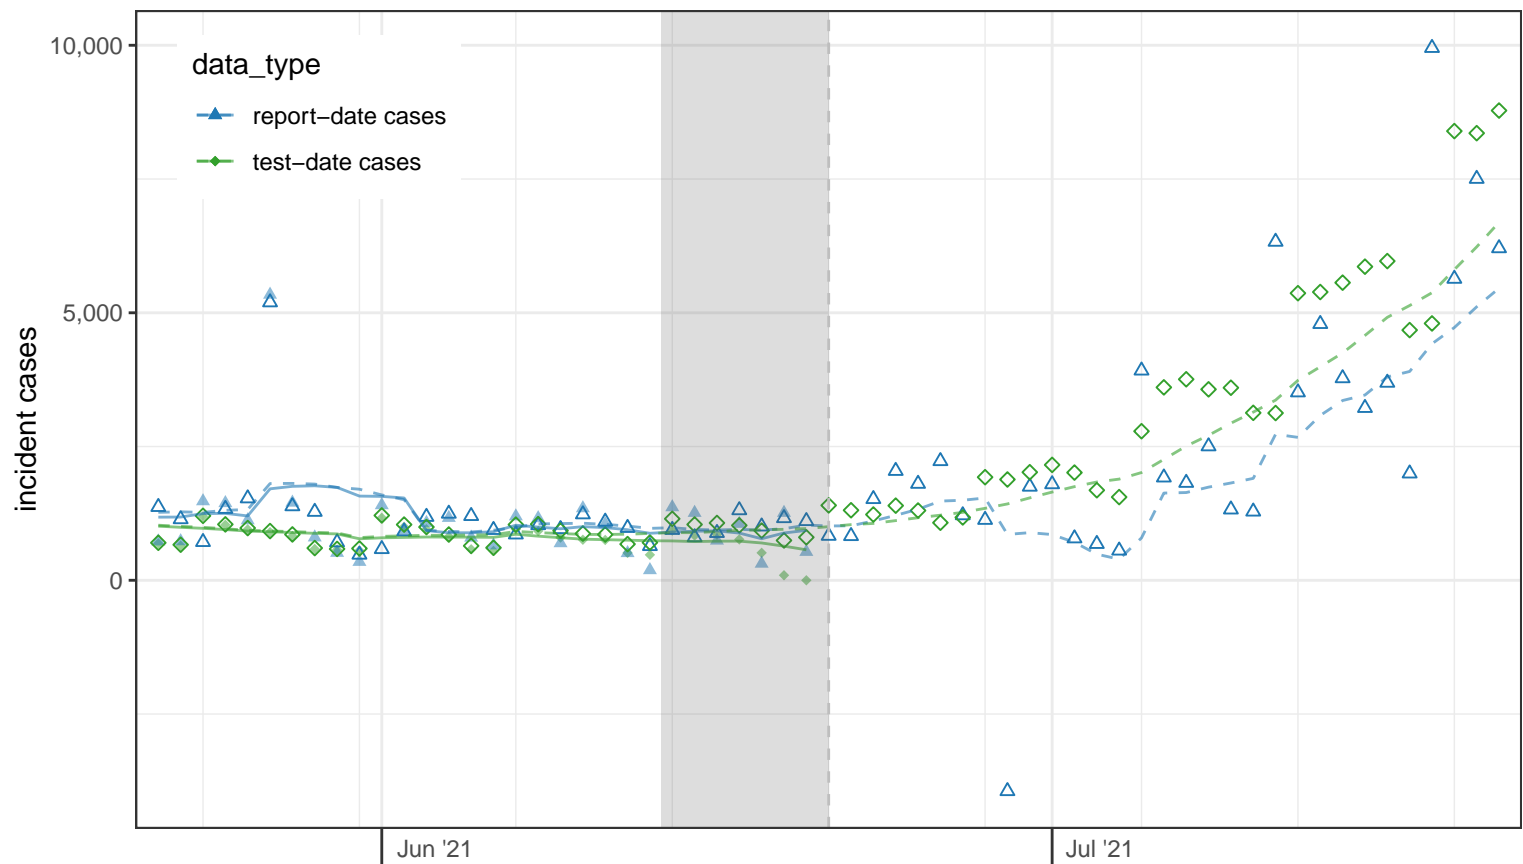

California case data as of: 2021-06-28

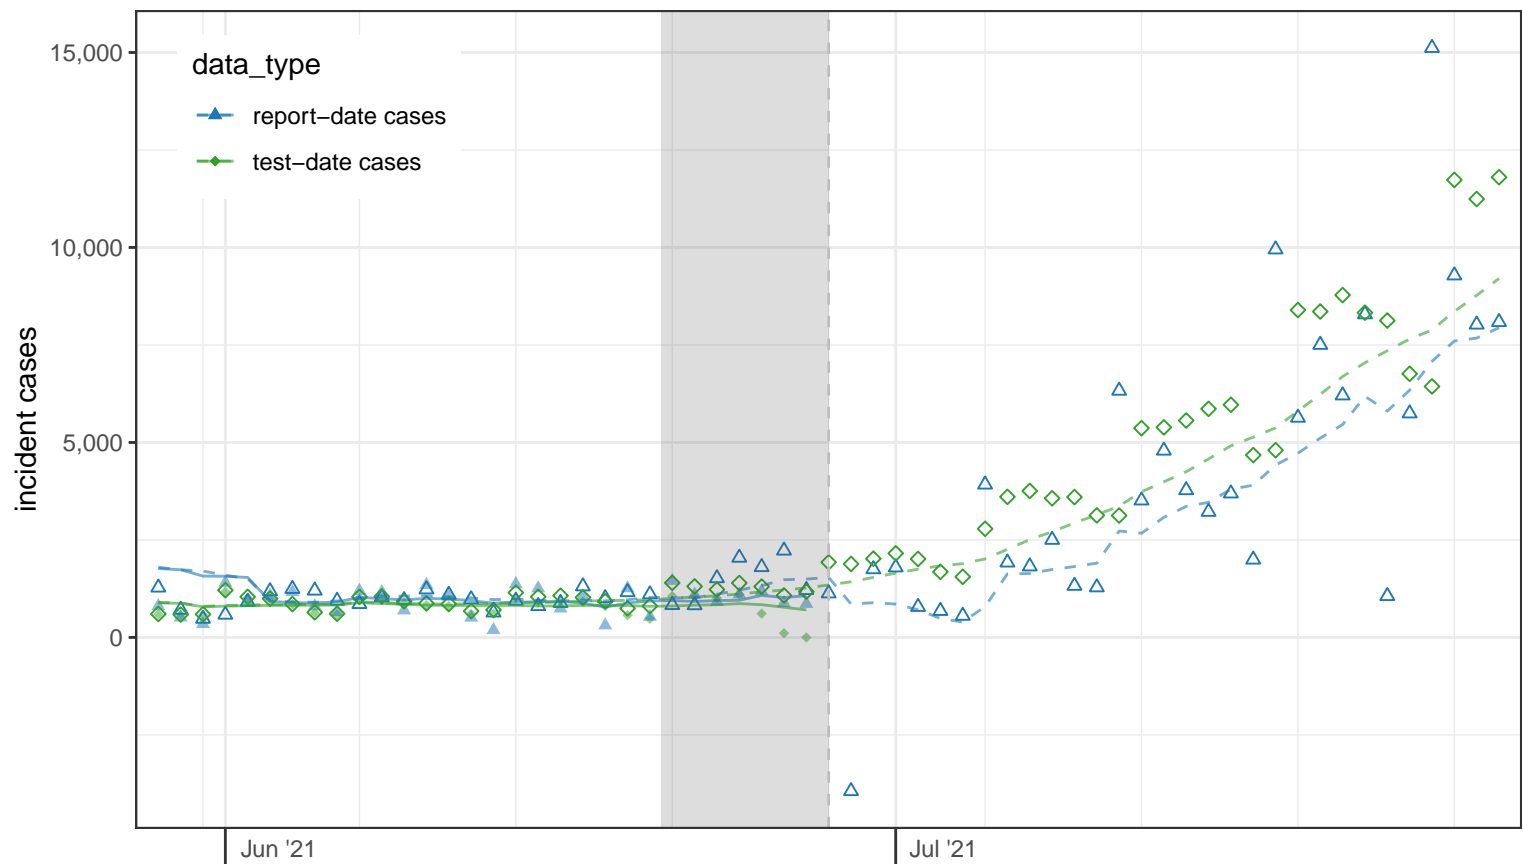

California case data as of: 2021-07-05

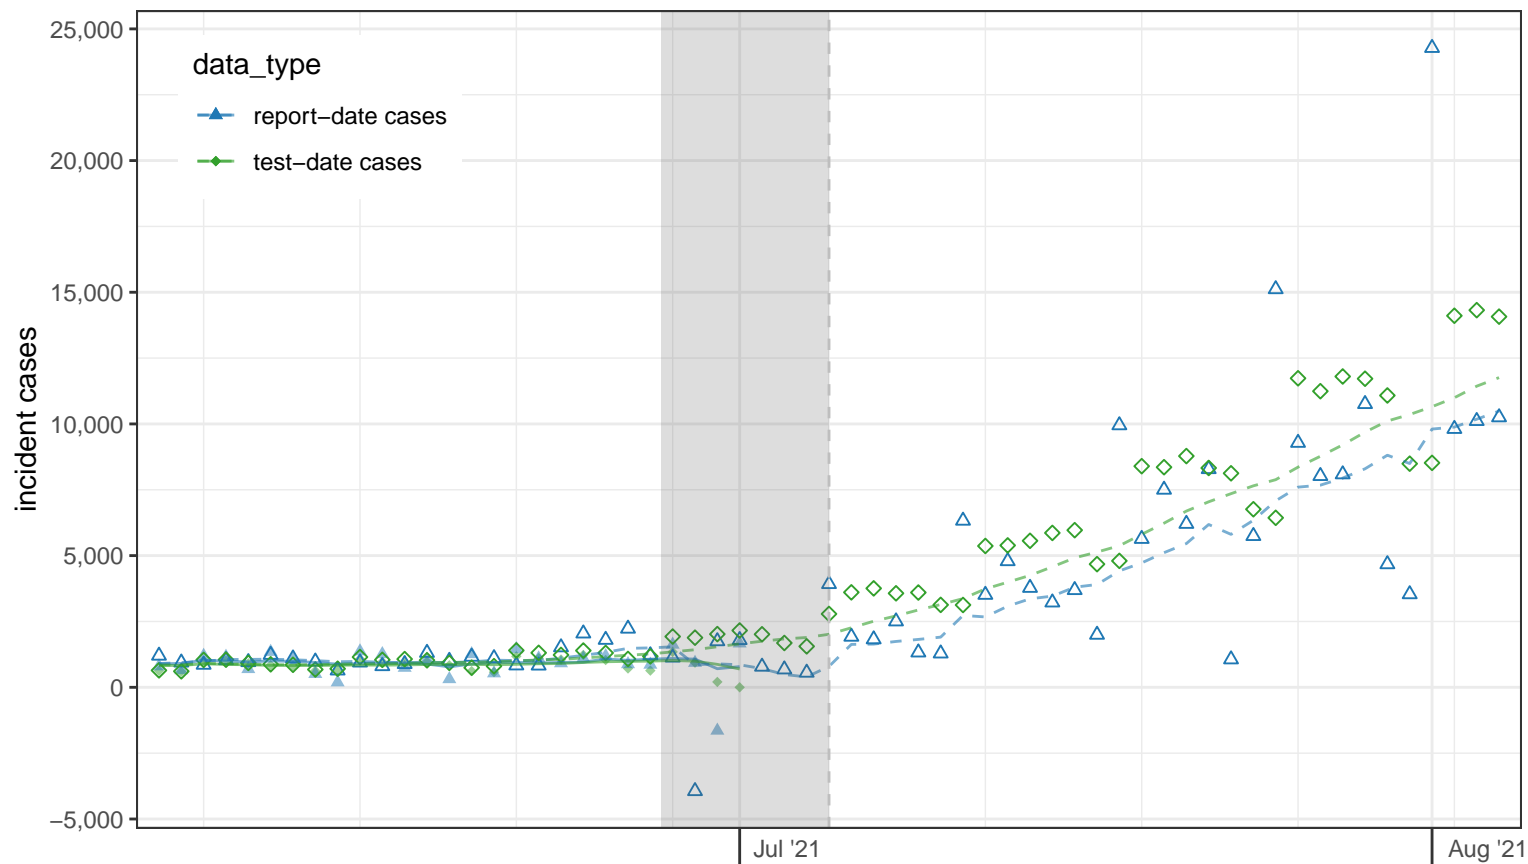

California case data as of: 2021-07-12

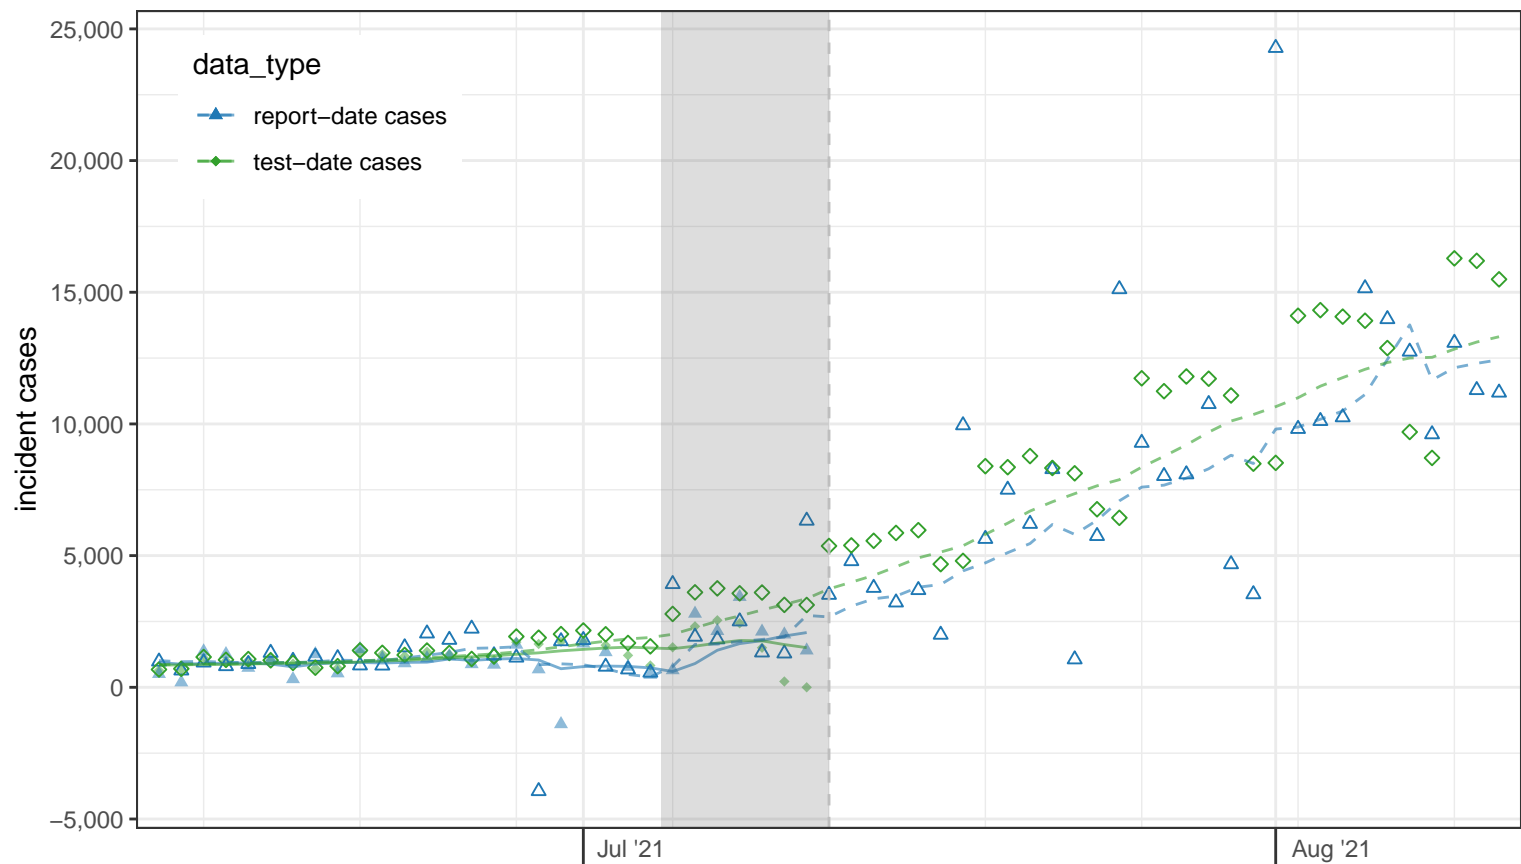

California case data as of: 2021-07-19

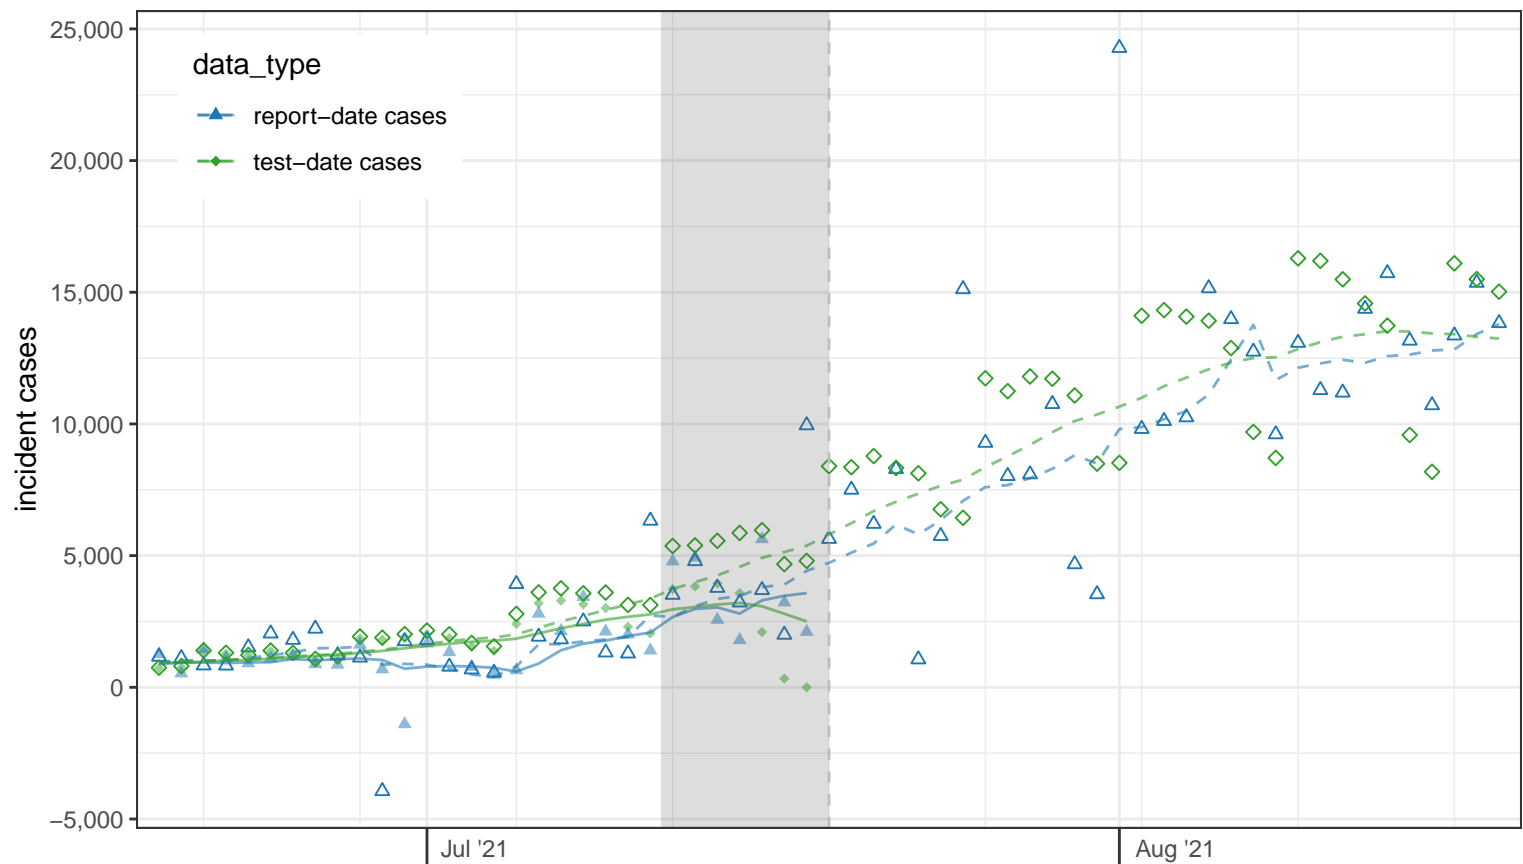

California case data as of: 2021-07-26

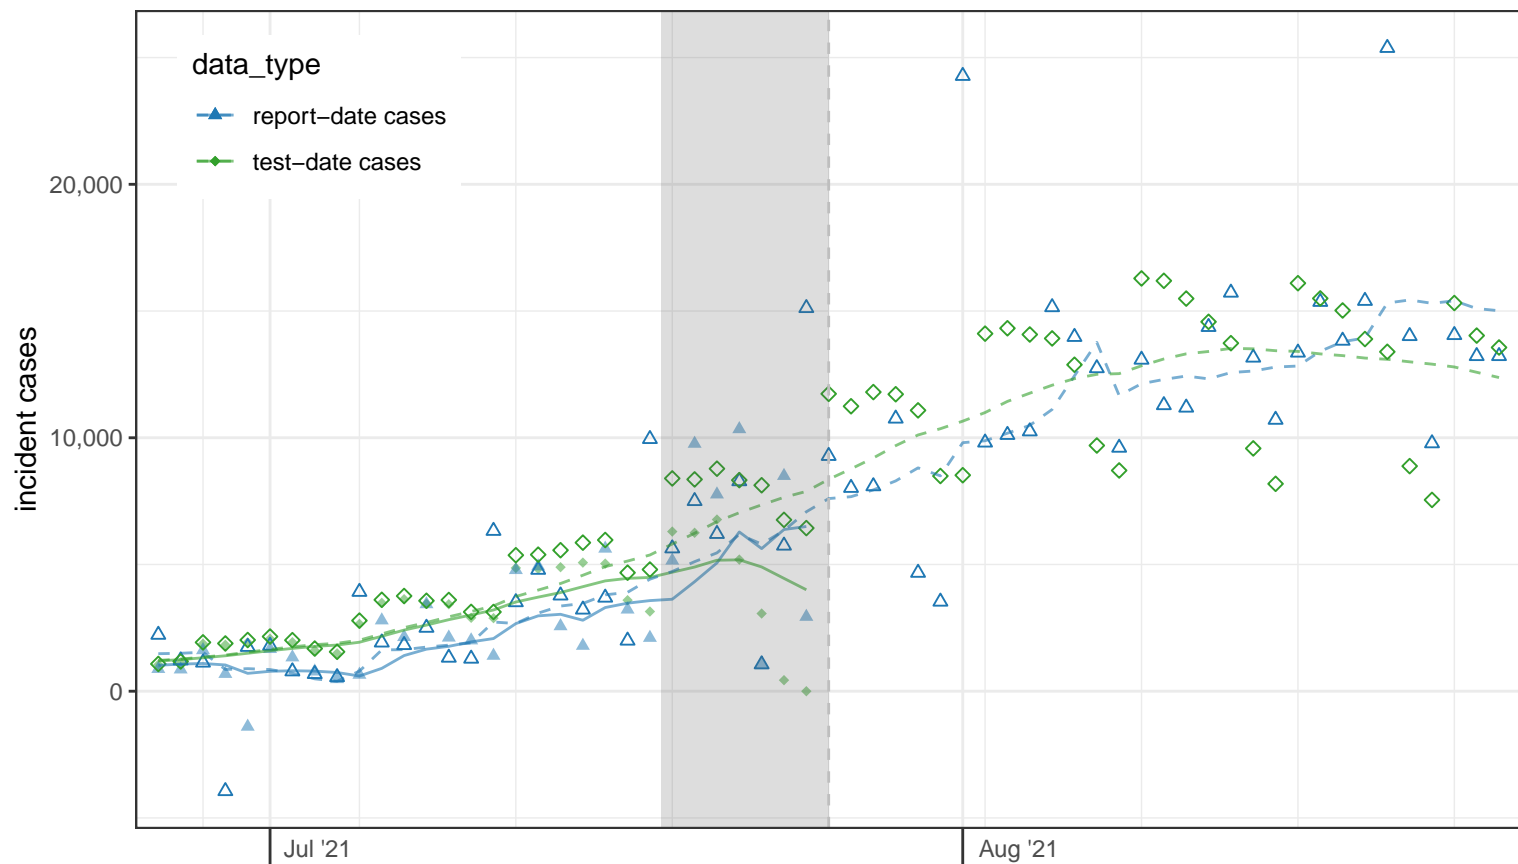

California case data as of: 2021-08-02

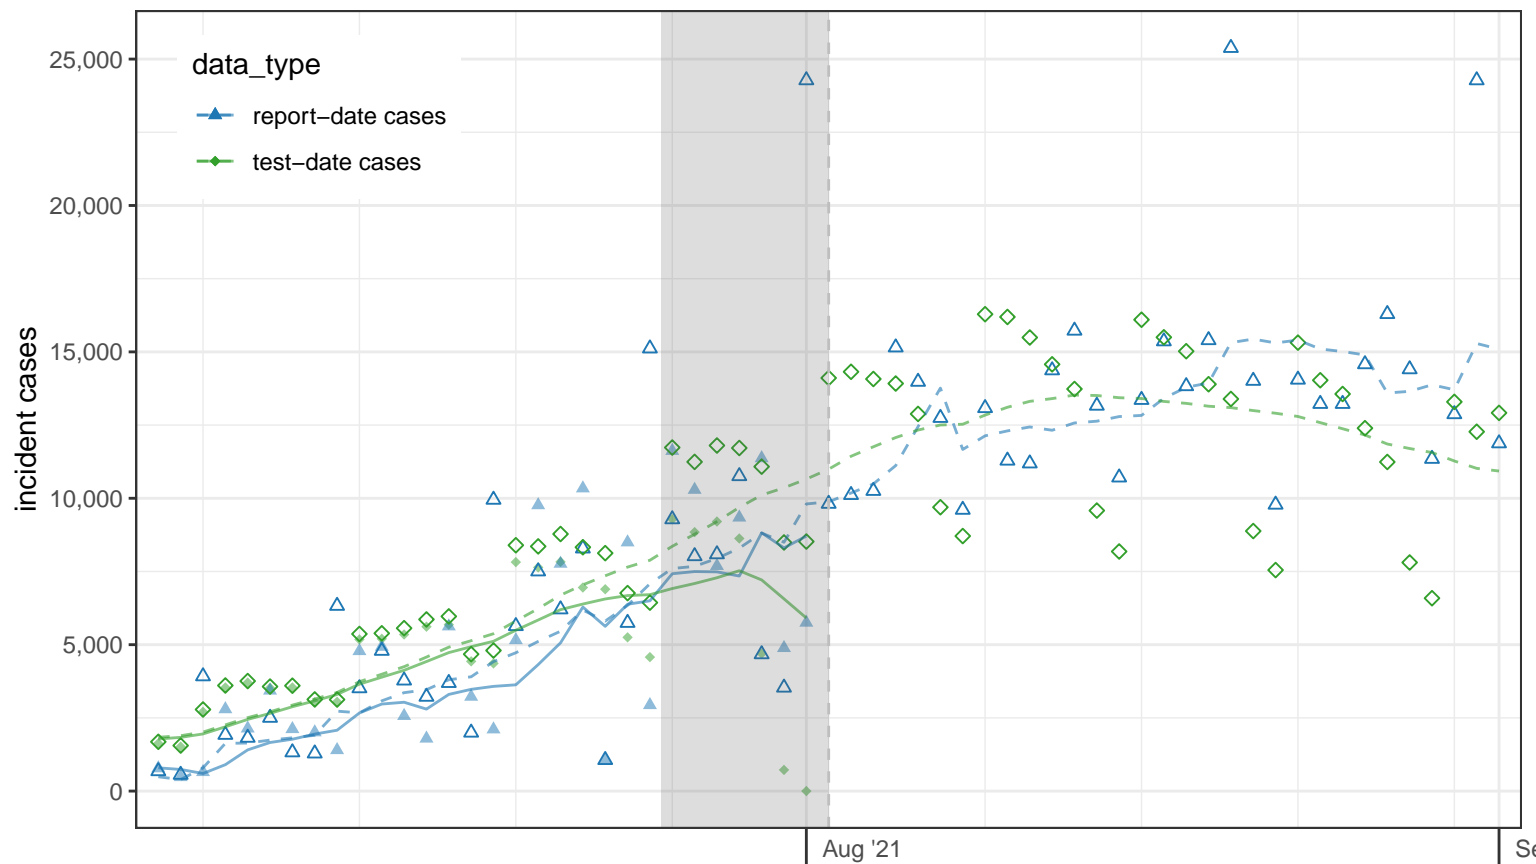

California case data as of: 2021-08-09

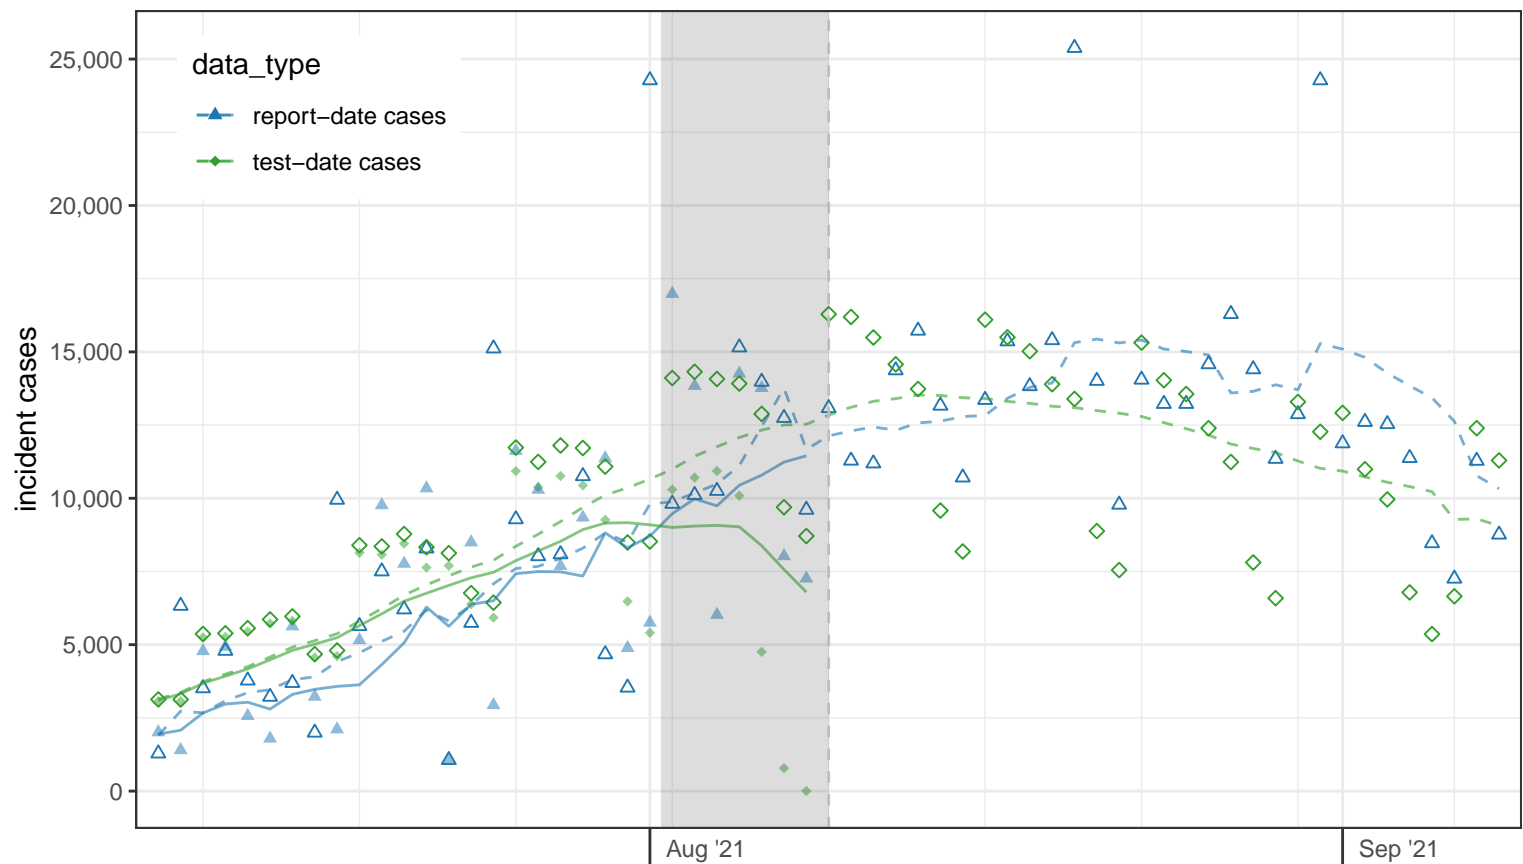



California case data as of: 2021-08-16

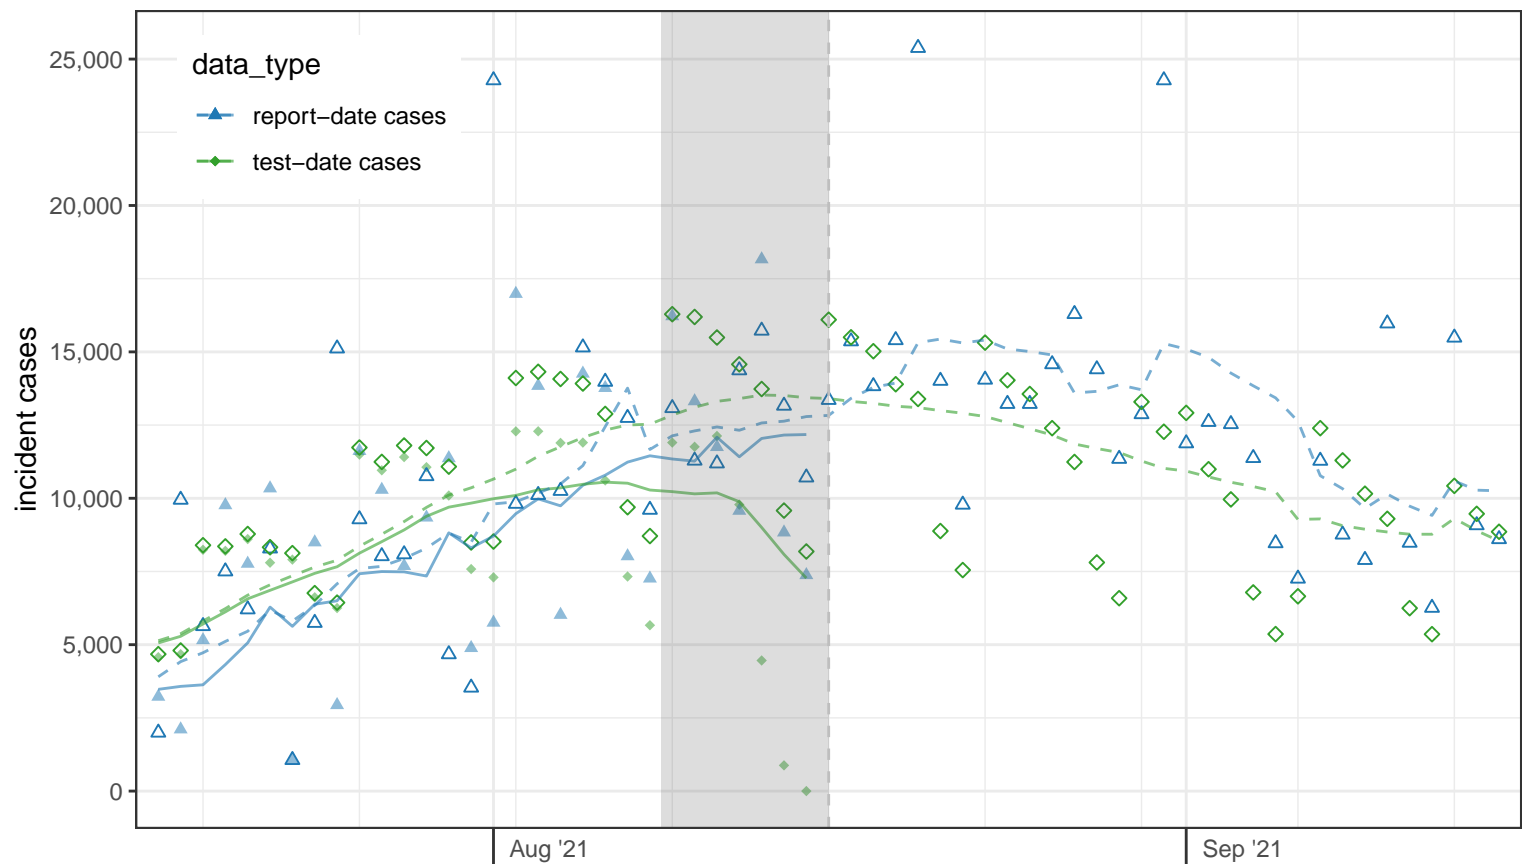

California case data as of: 2021-08-23

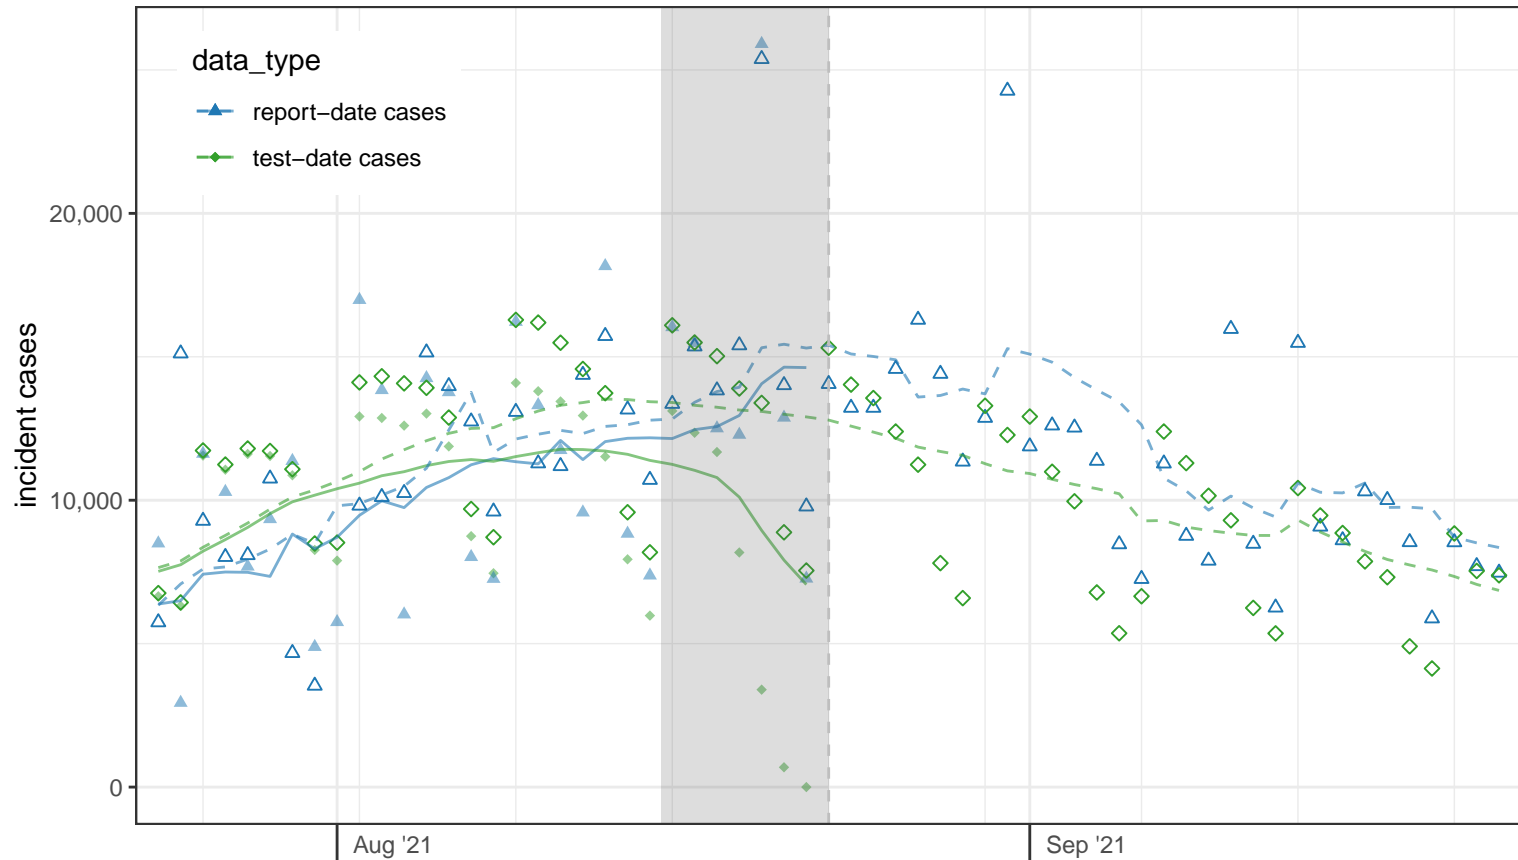

California case data as of: 2021-08-30

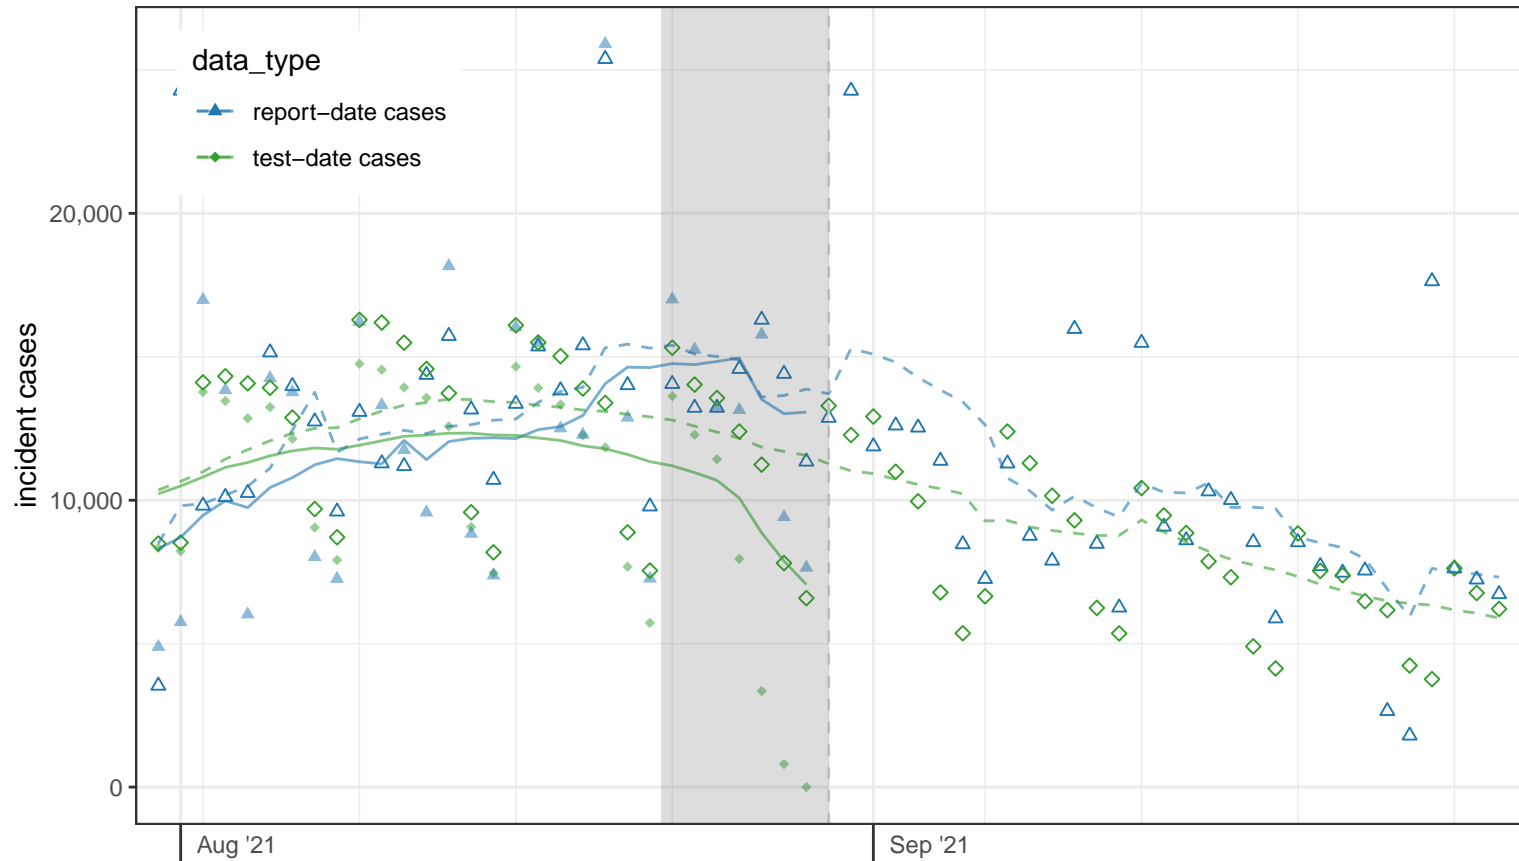

California case data as of: 2021-09-06

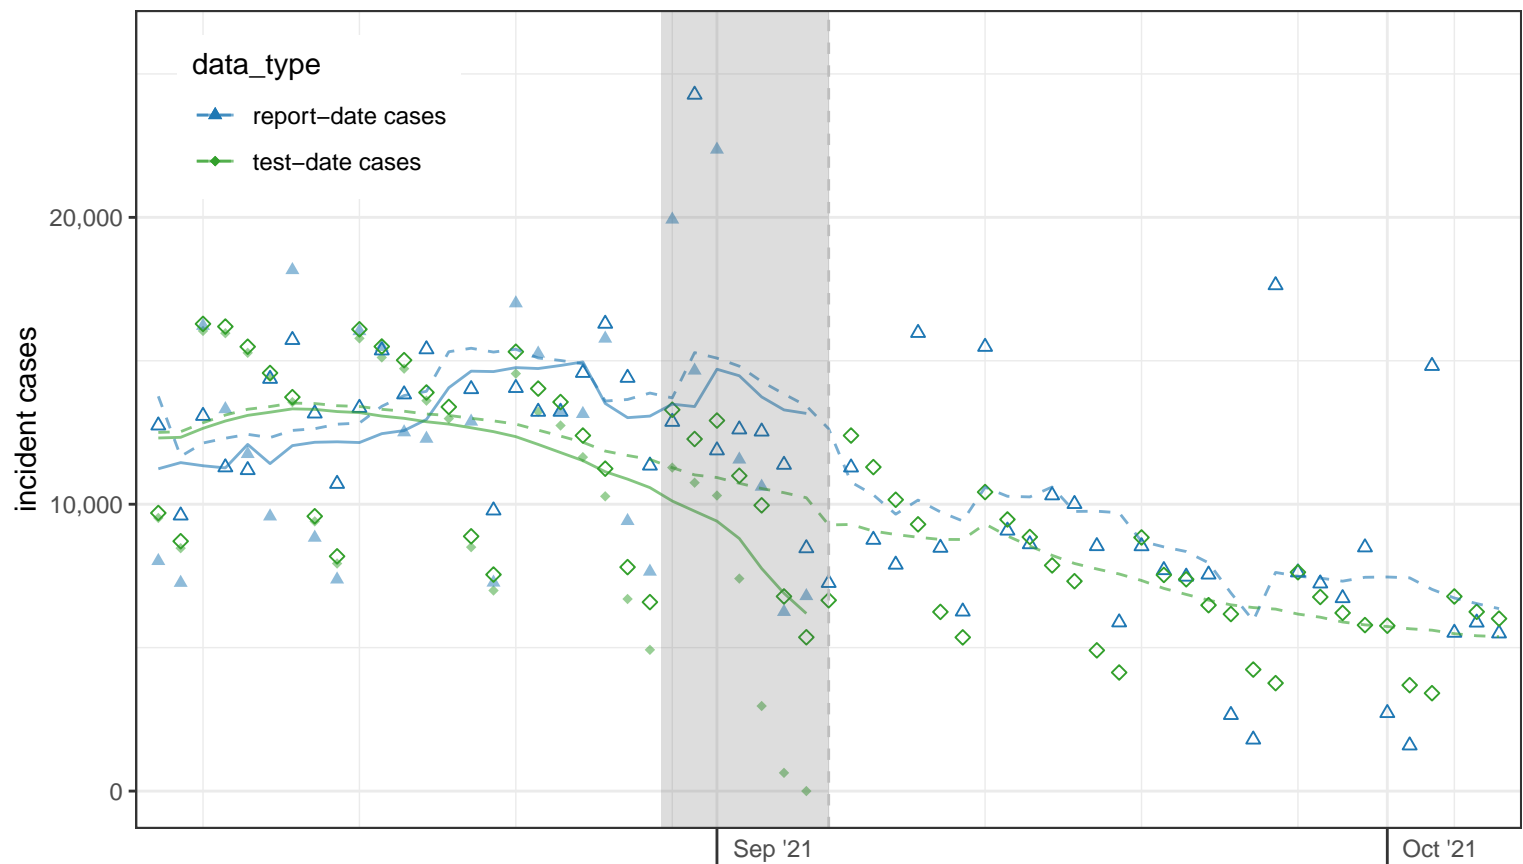

California case data as of: 2021-09-13

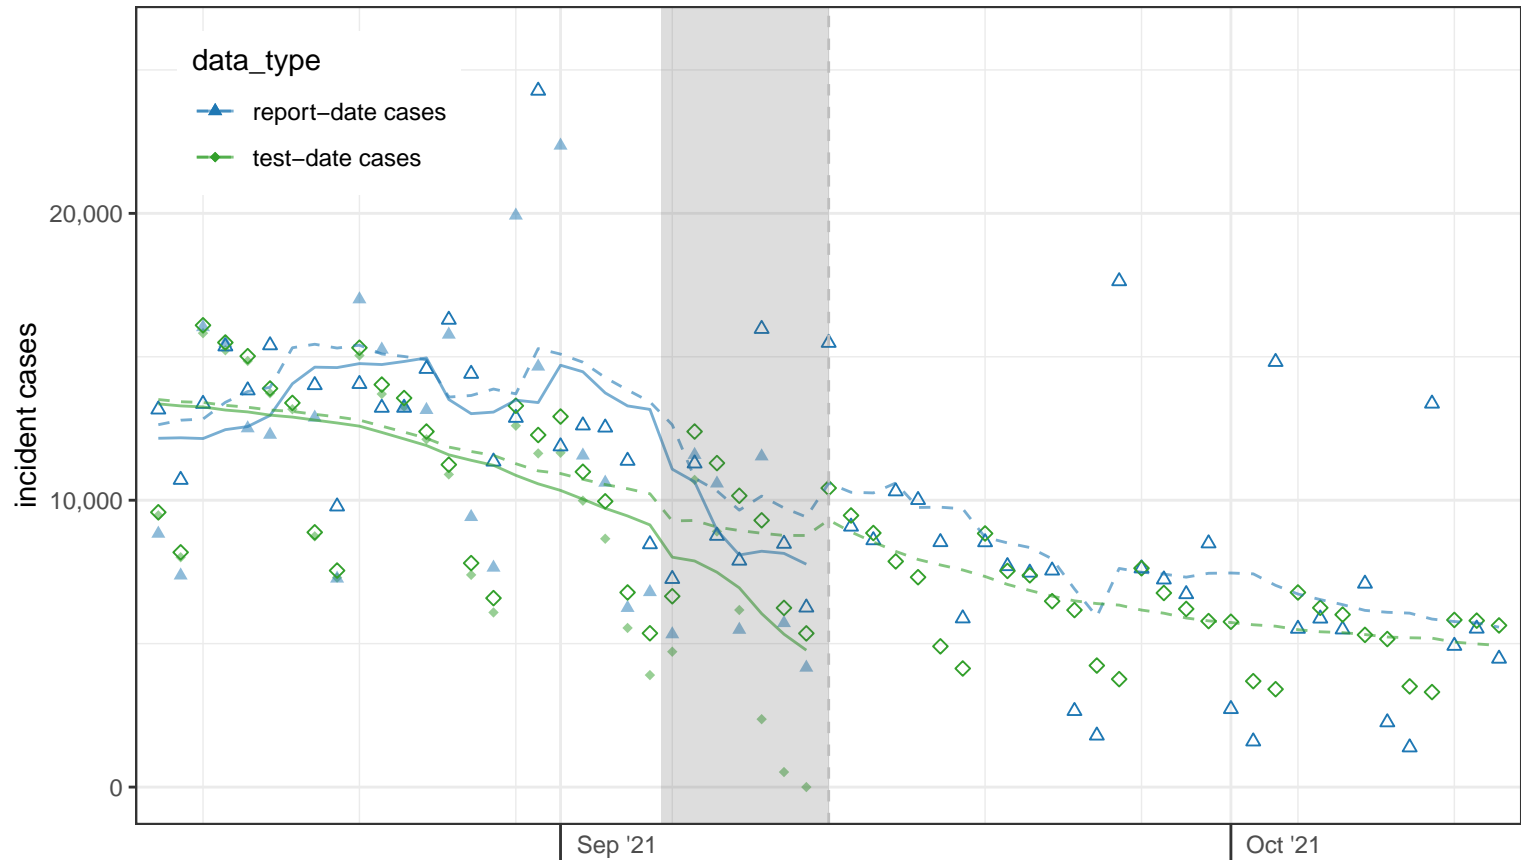

California case data as of: 2021-09-20

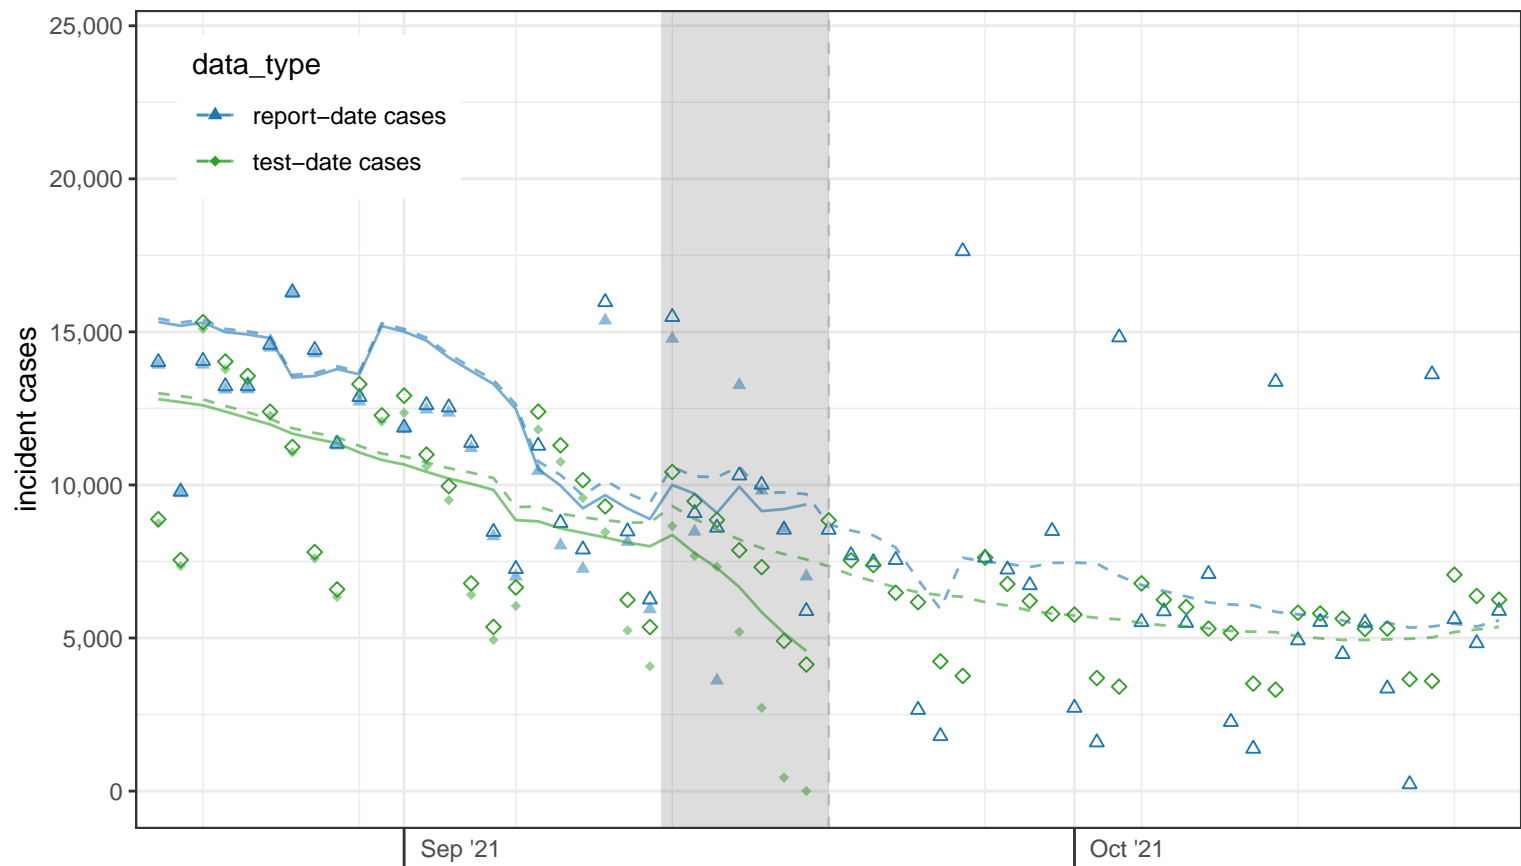

California case data as of: 2021-09-27

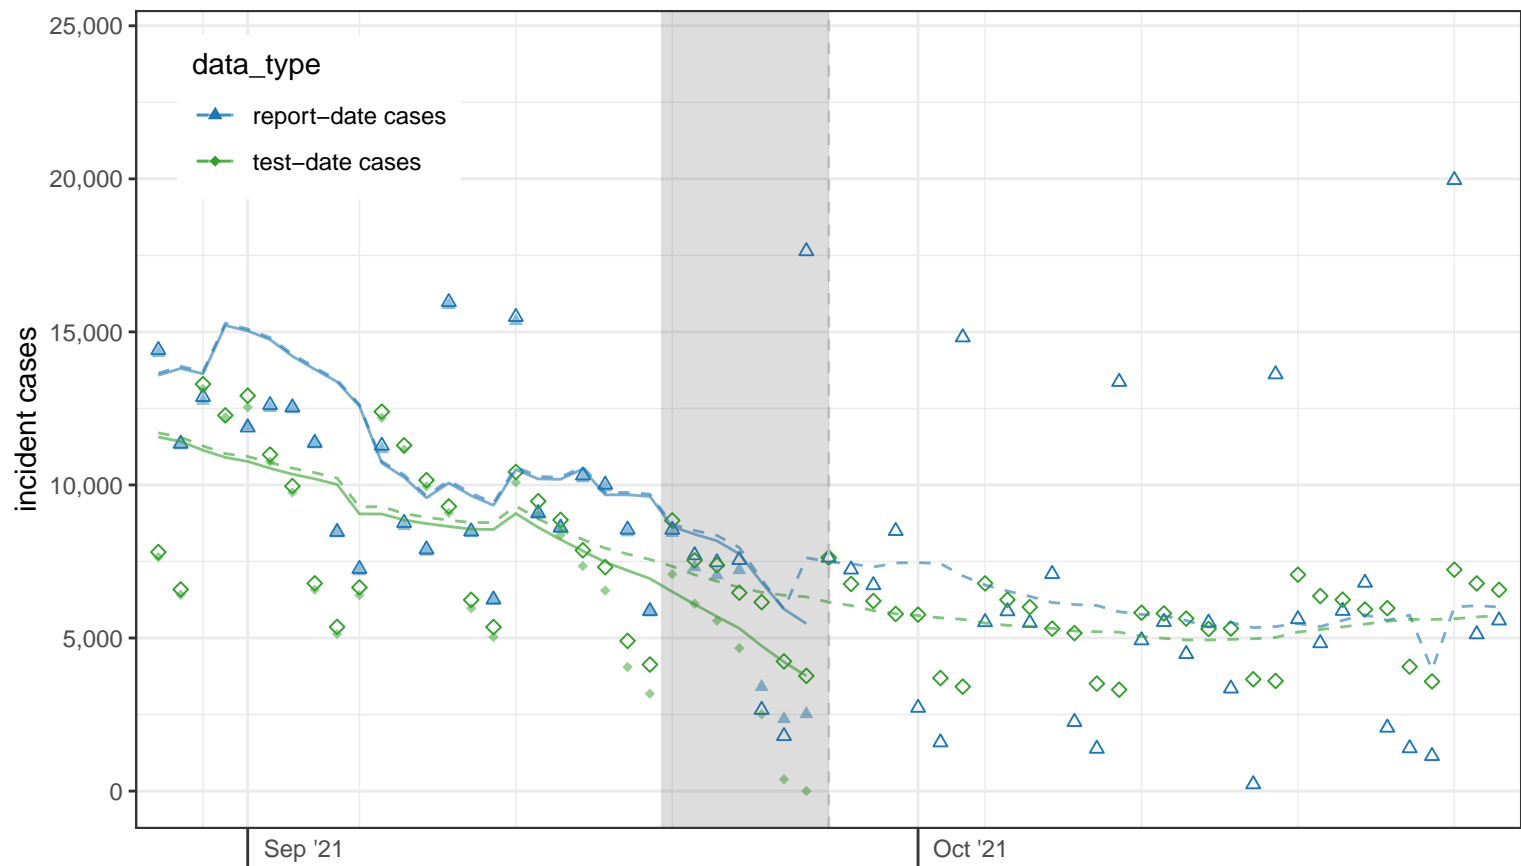

California case data as of: 2021-10-04

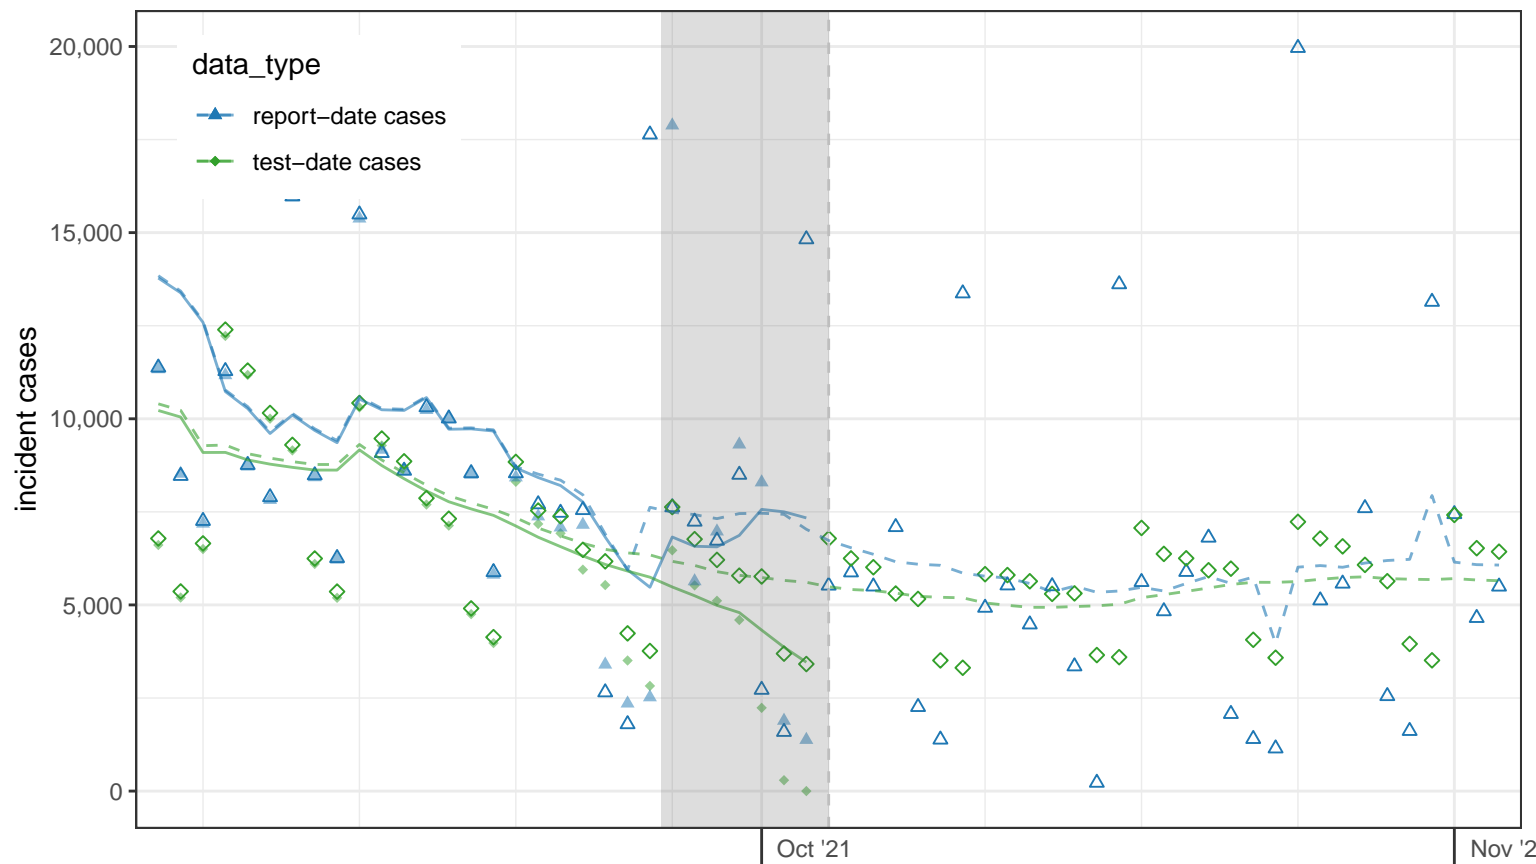



California case data as of: 2021-10-11

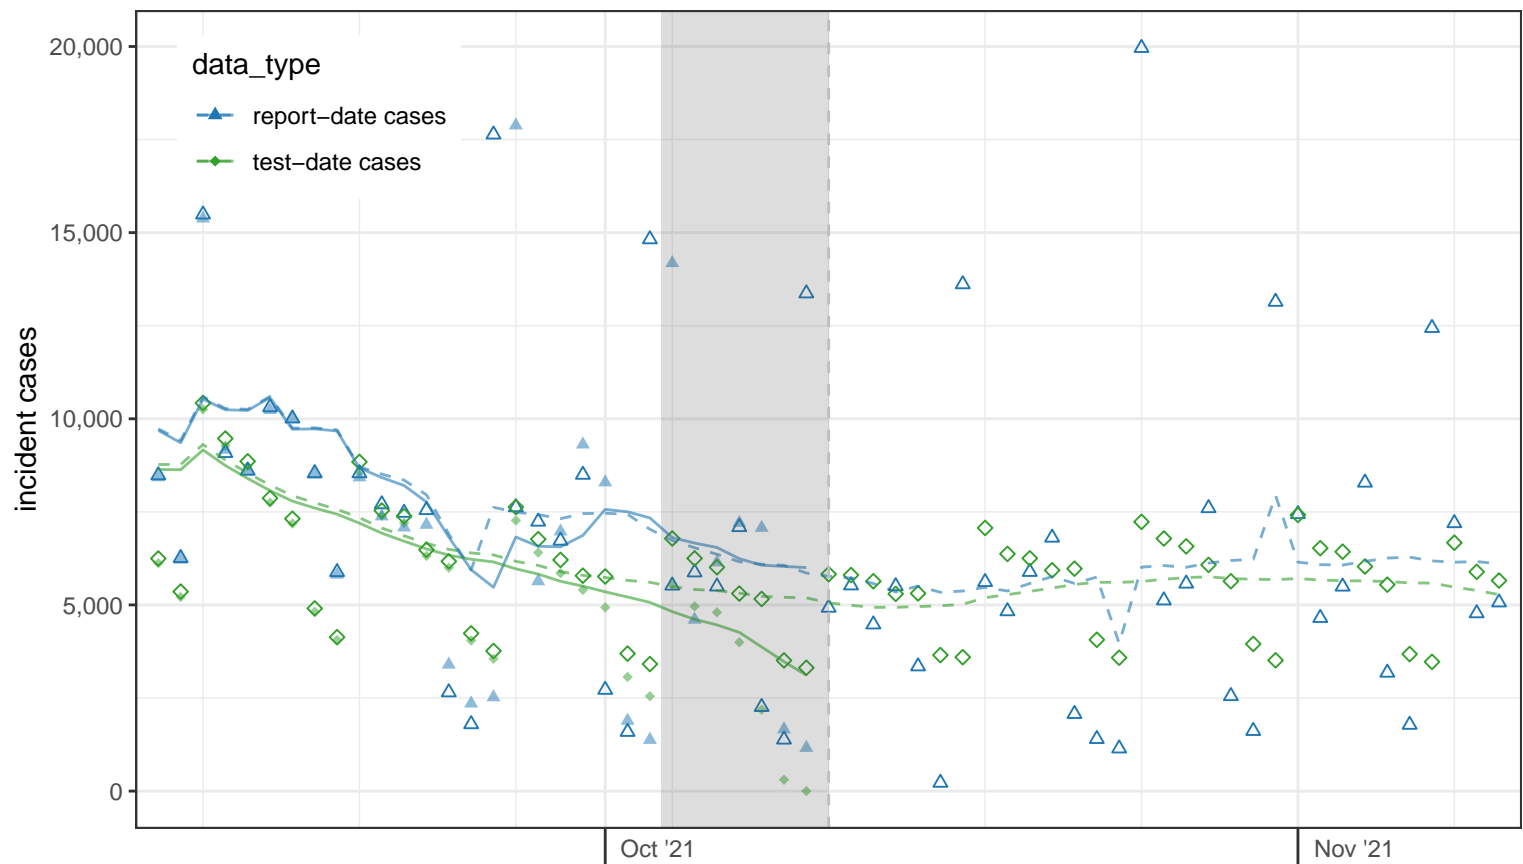

California case data as of: 2021-10-18

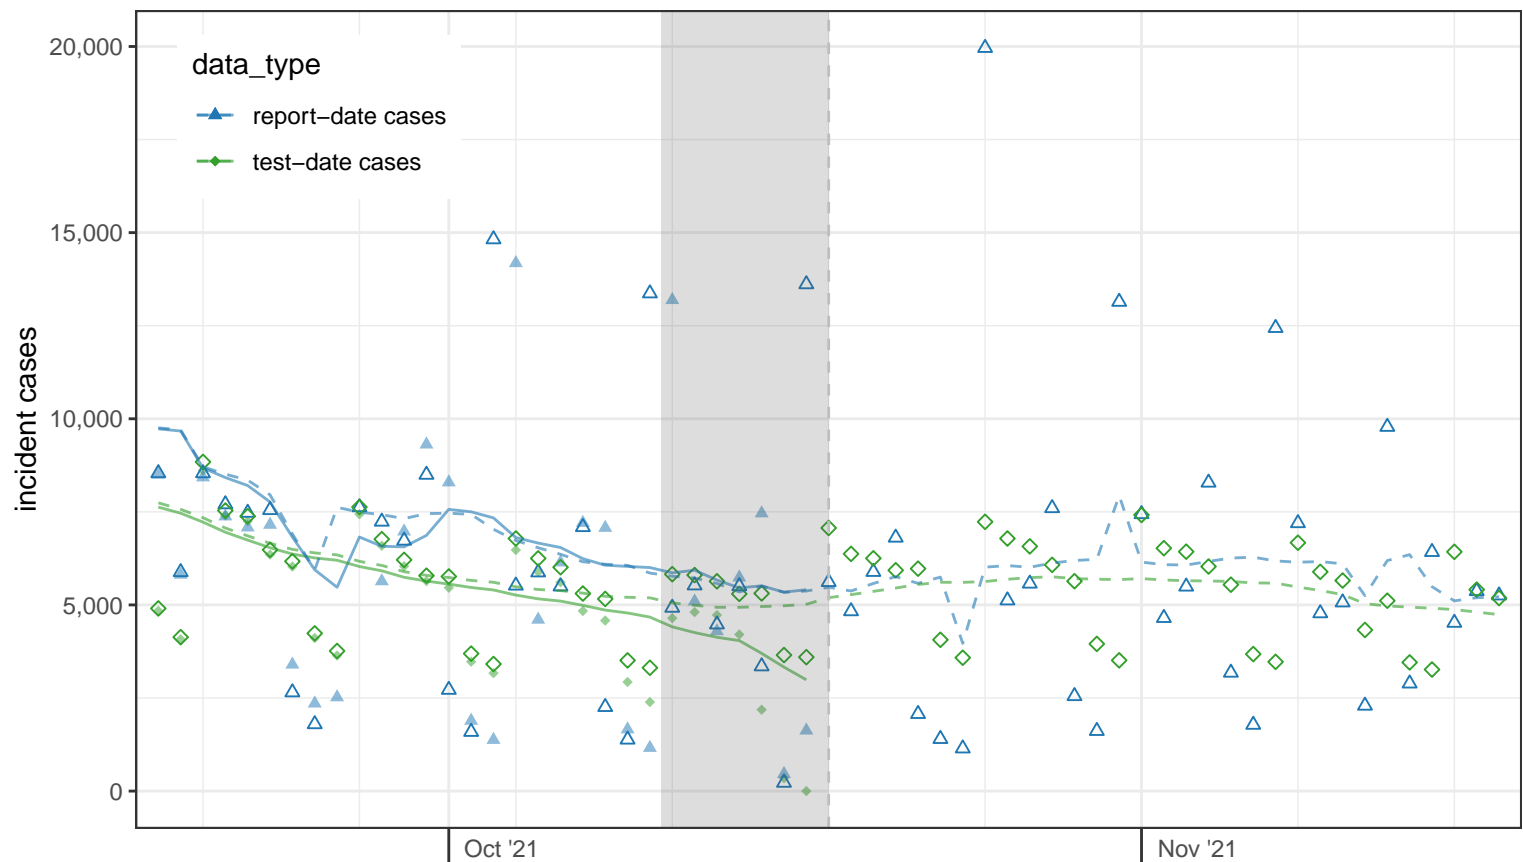

# California case data as of: 2021-11-01

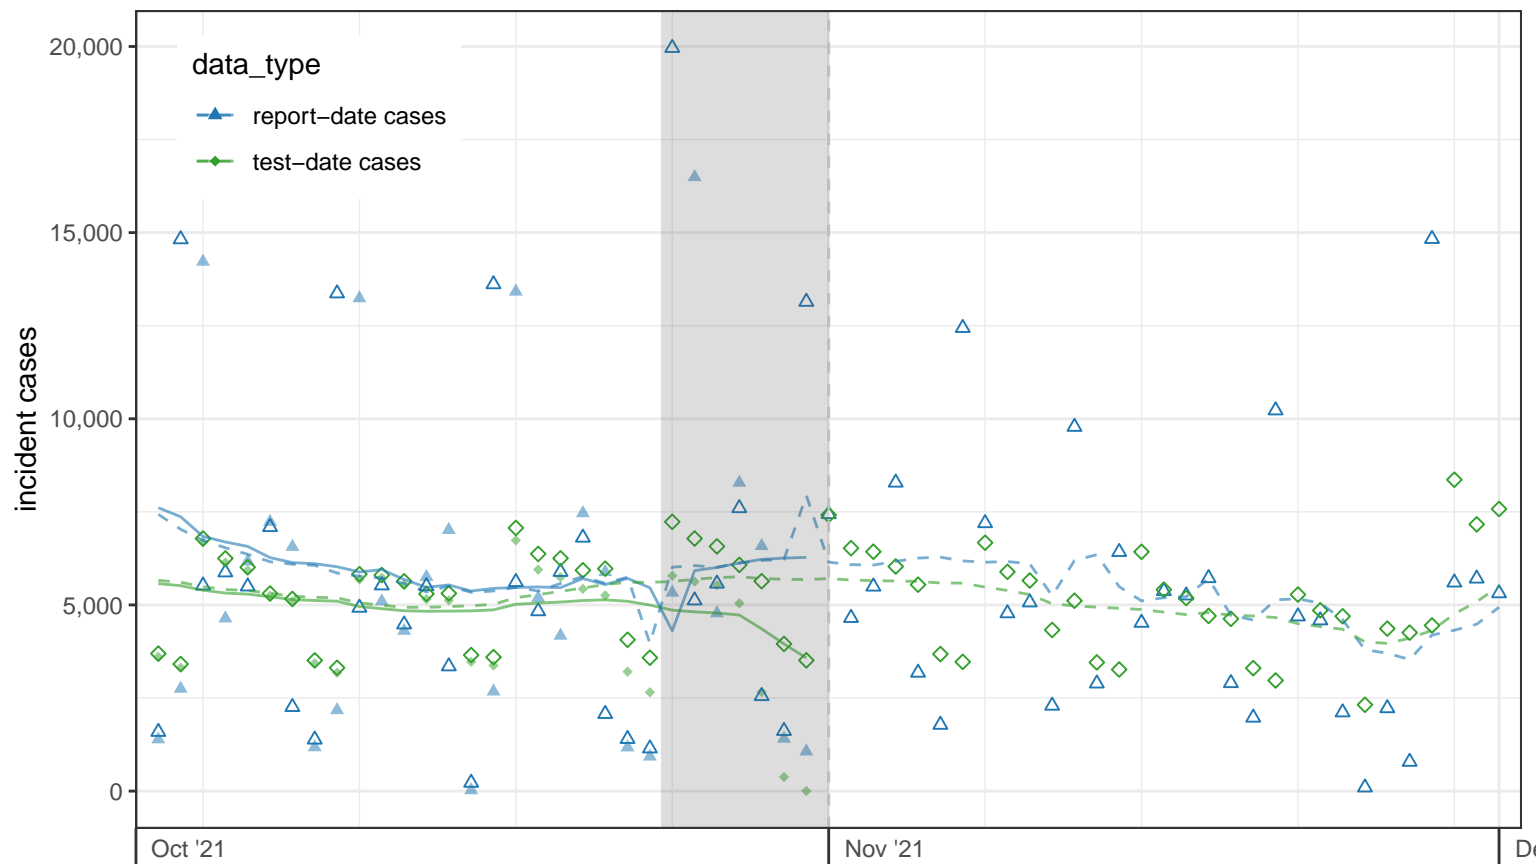

# California case data as of: 2021-11-08

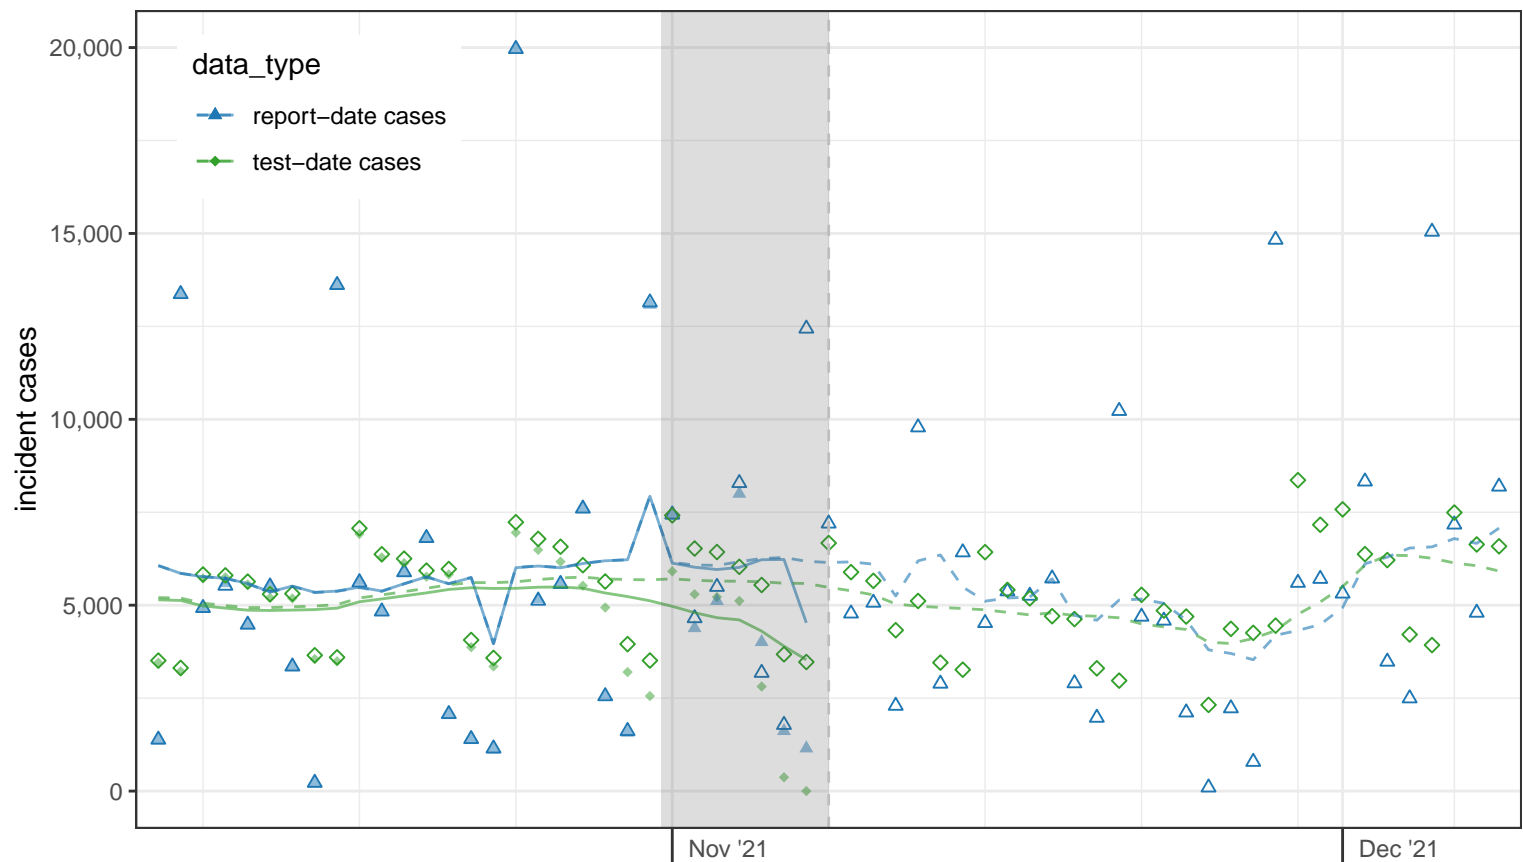

California case data as of: 2021-11-15

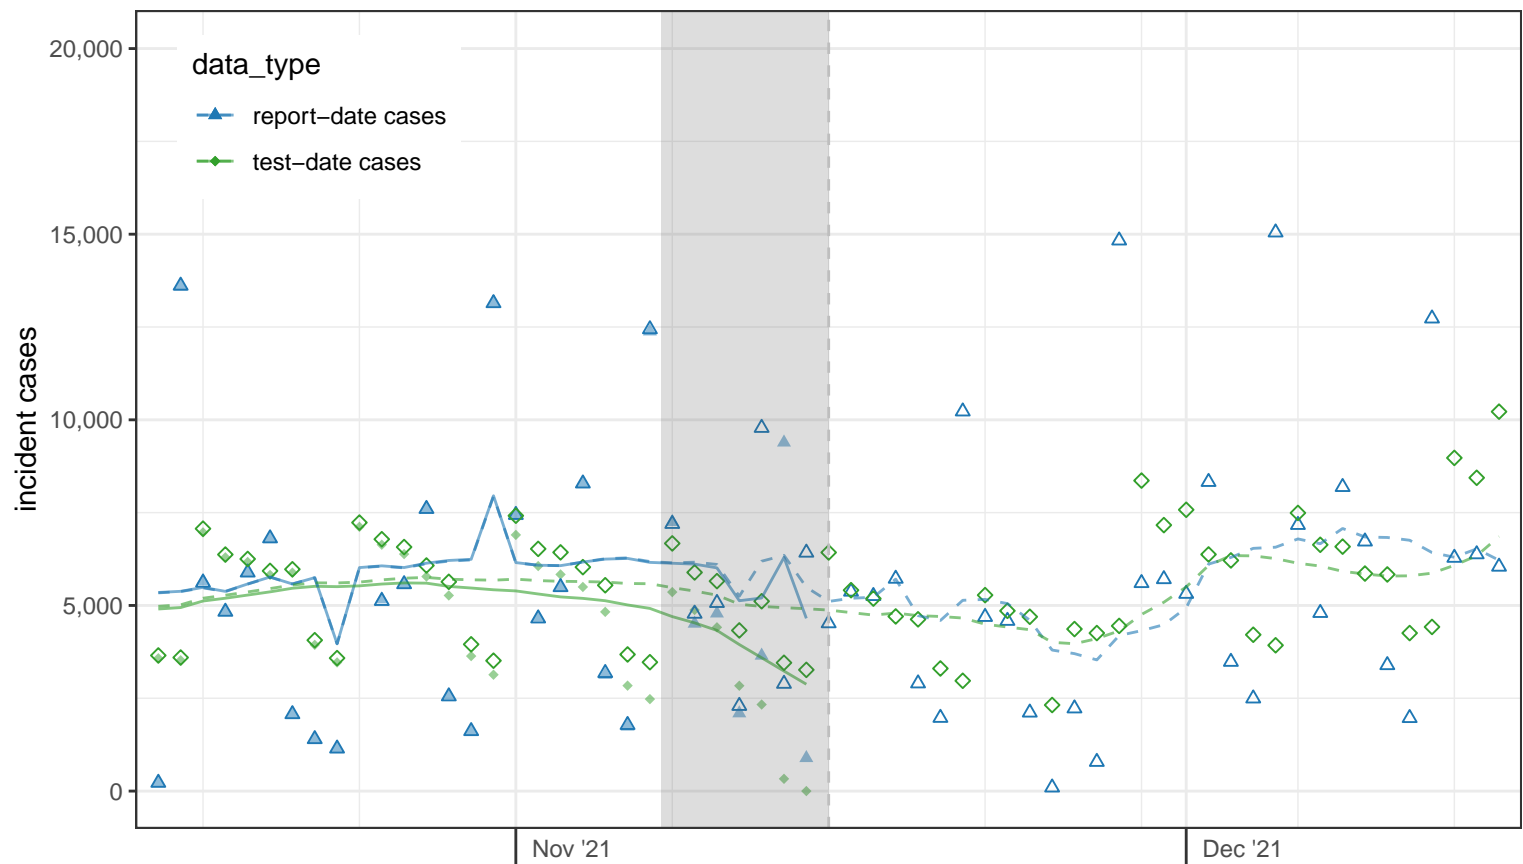

California case data as of: 2021-11-22

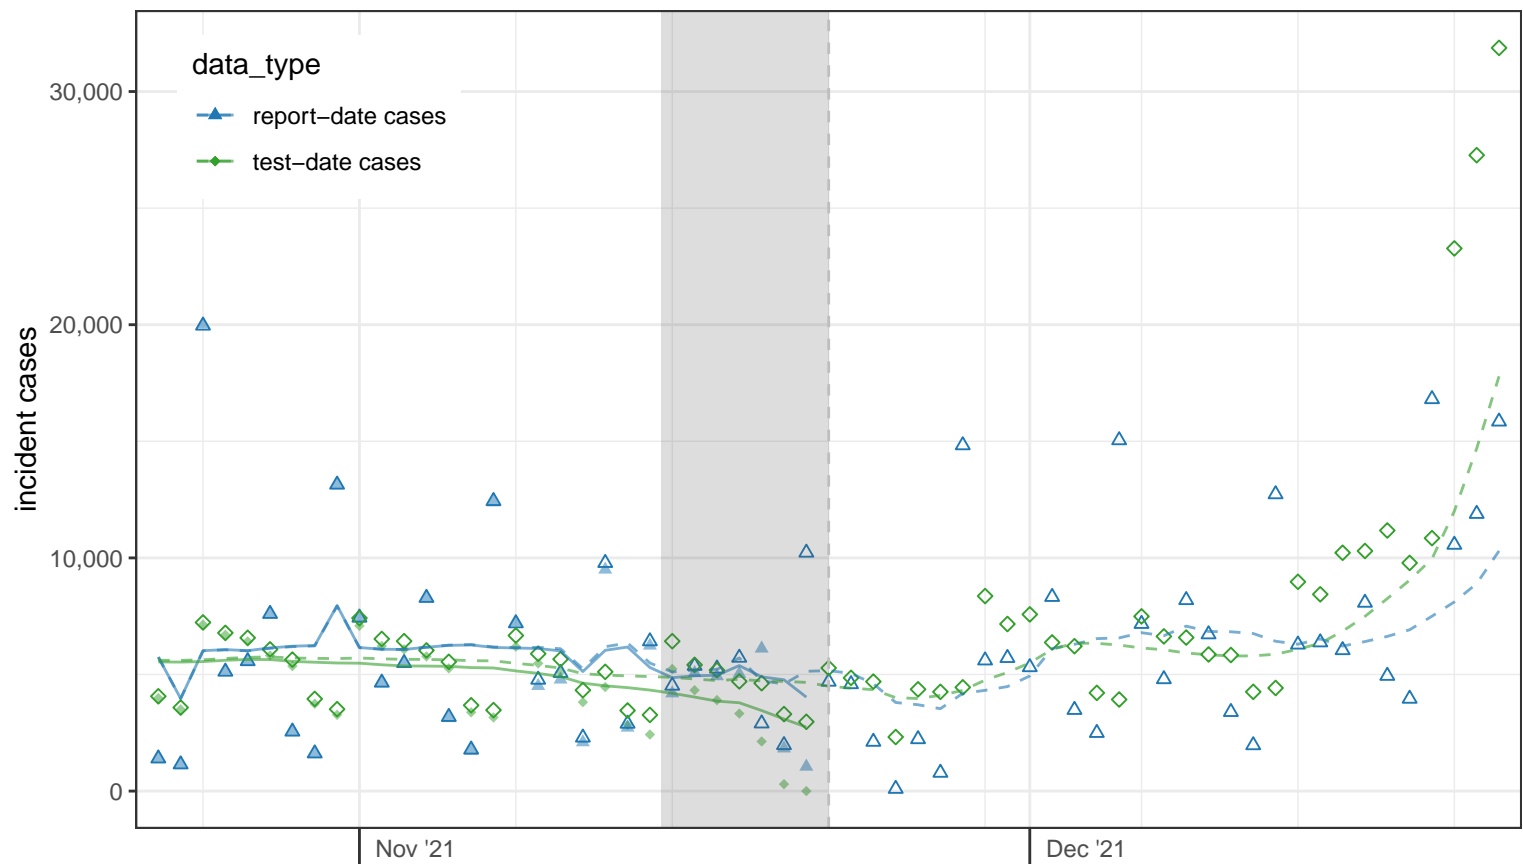

# California case data as of: 2021-11-29

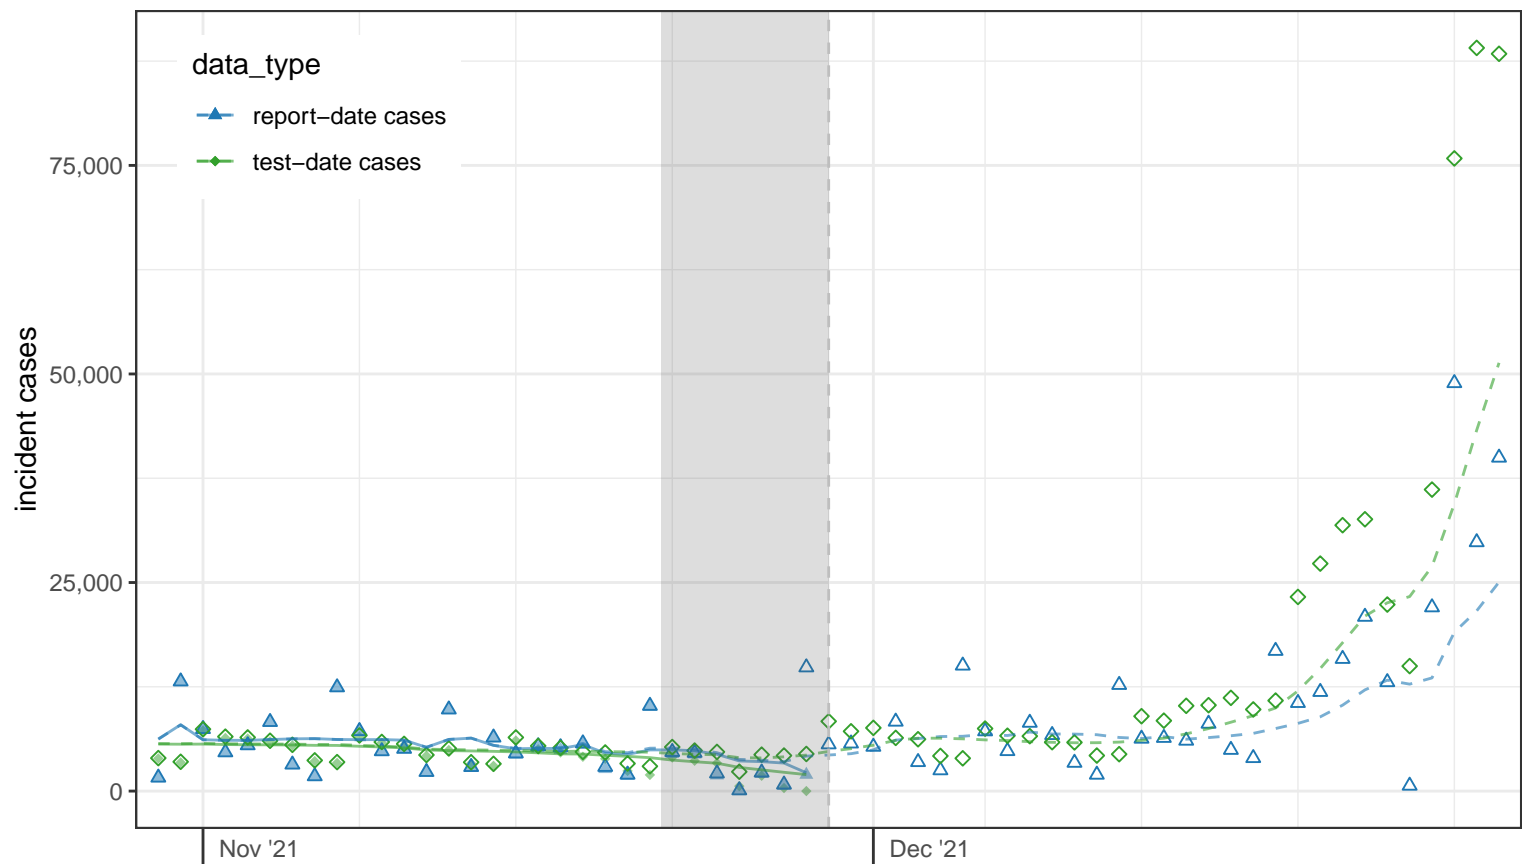

California case data as of: 2021-12-06

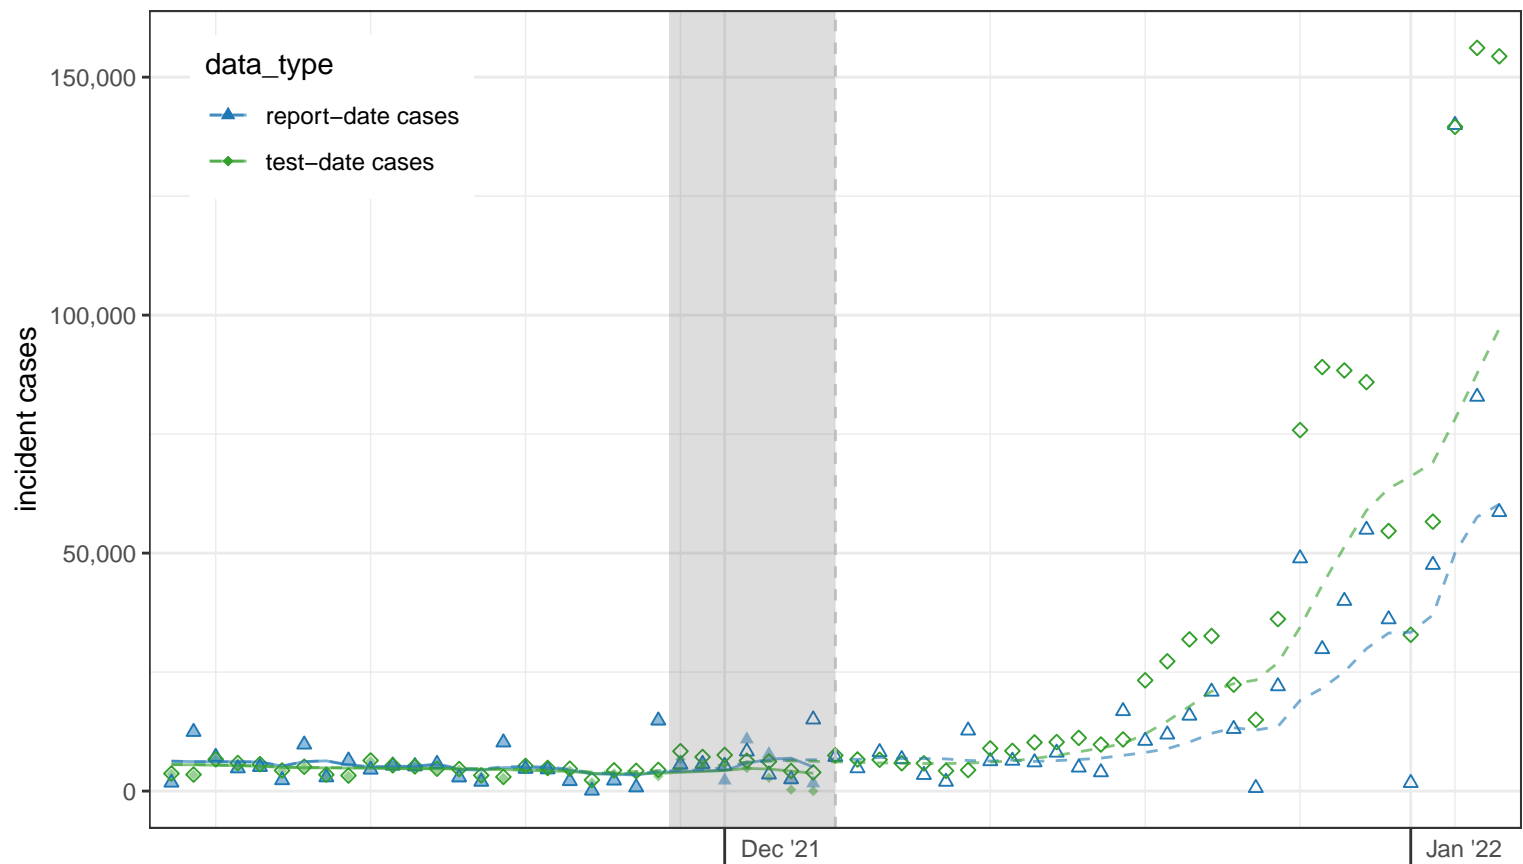



California case data as of: 2021-12-13

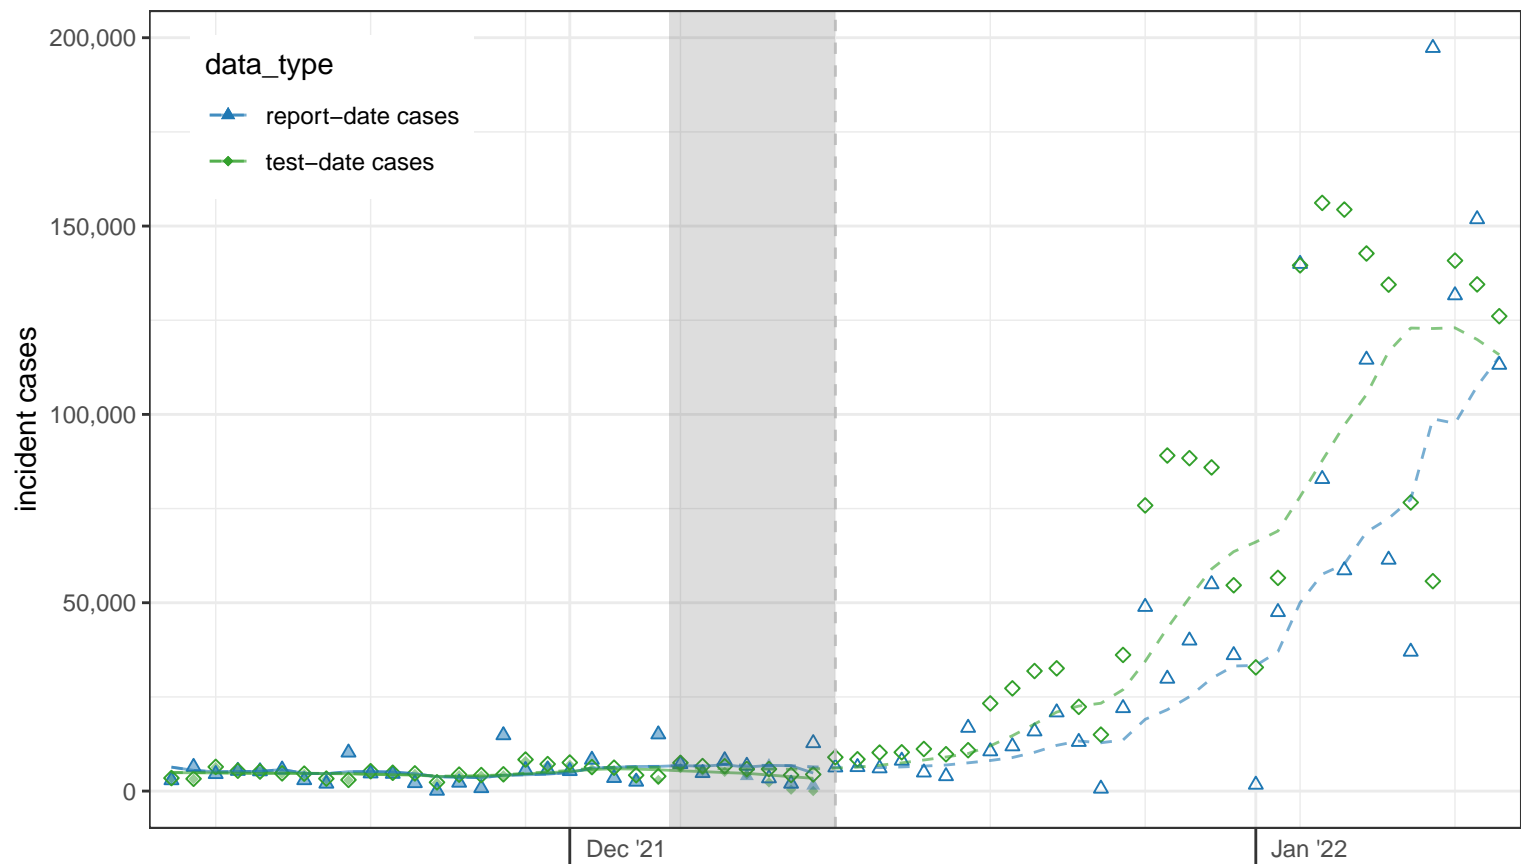

California case data as of: 2021-12-20

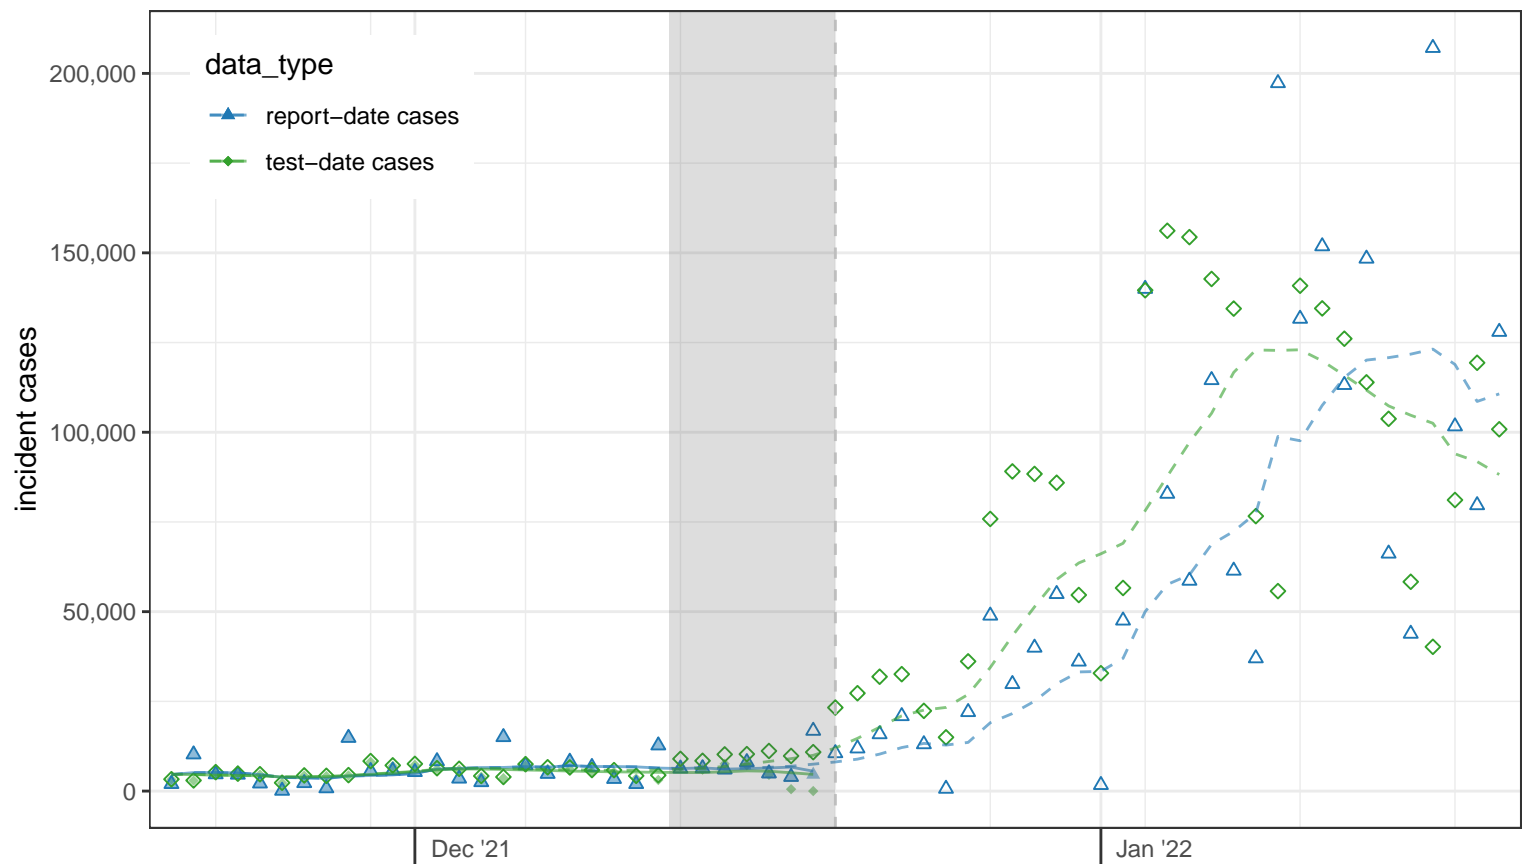

California case data as of: 2021-12-27

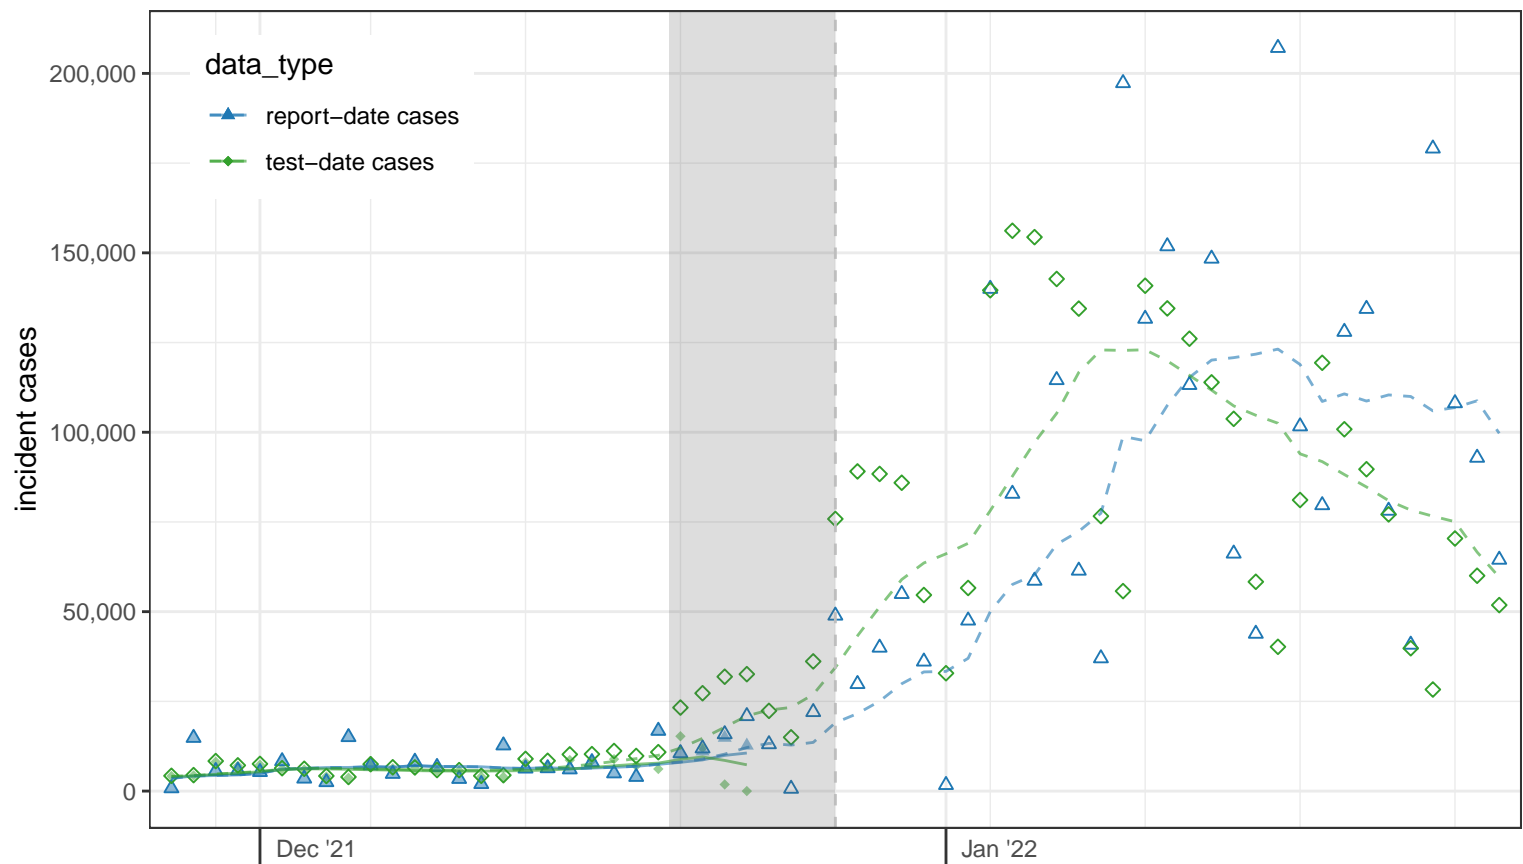

California case data as of: 2022-01-10

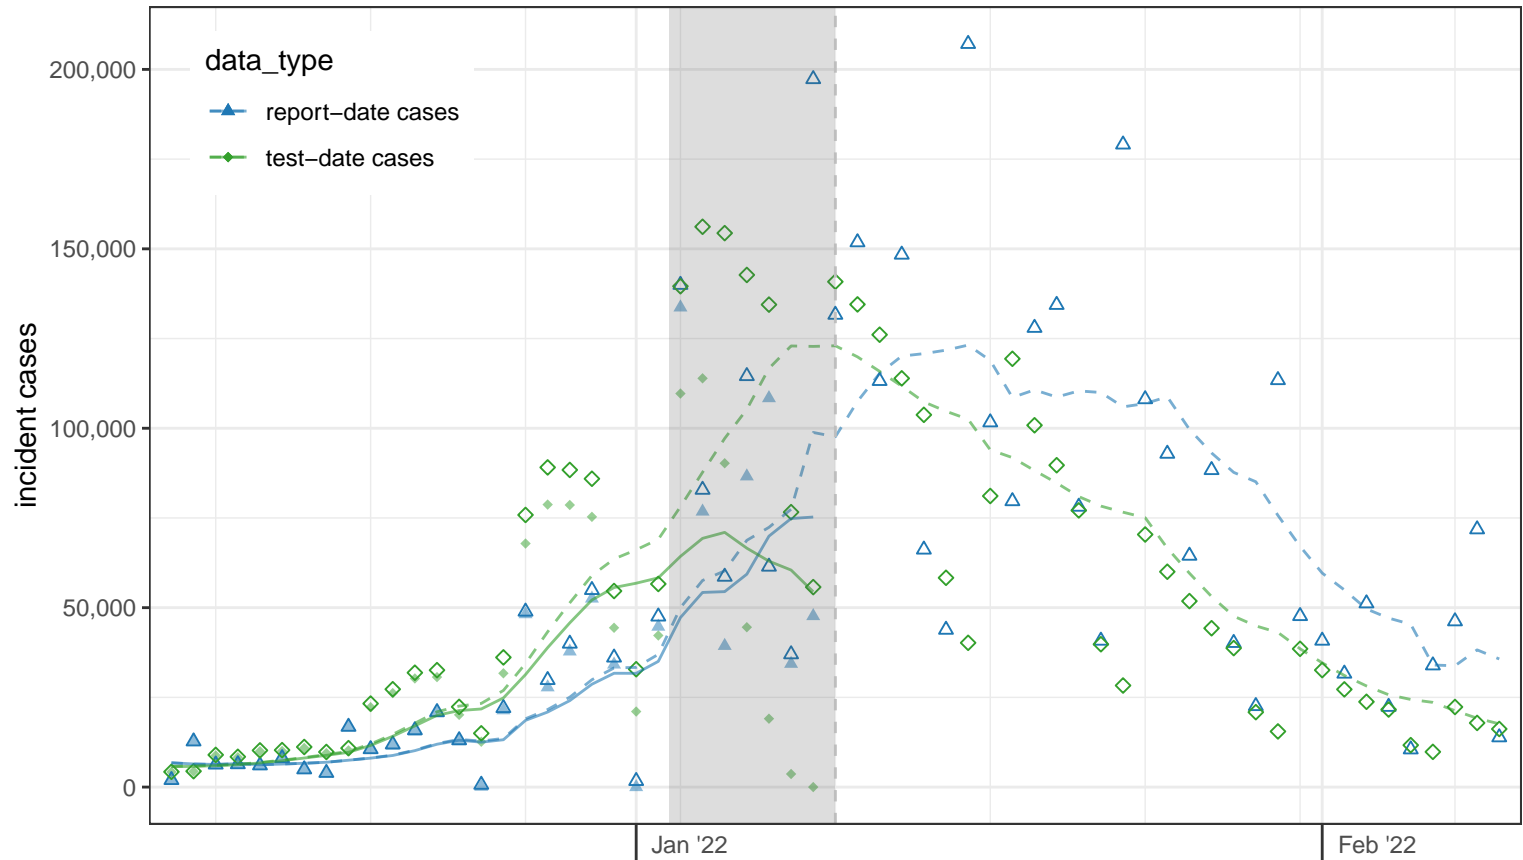

California case data as of: 2022-01-17

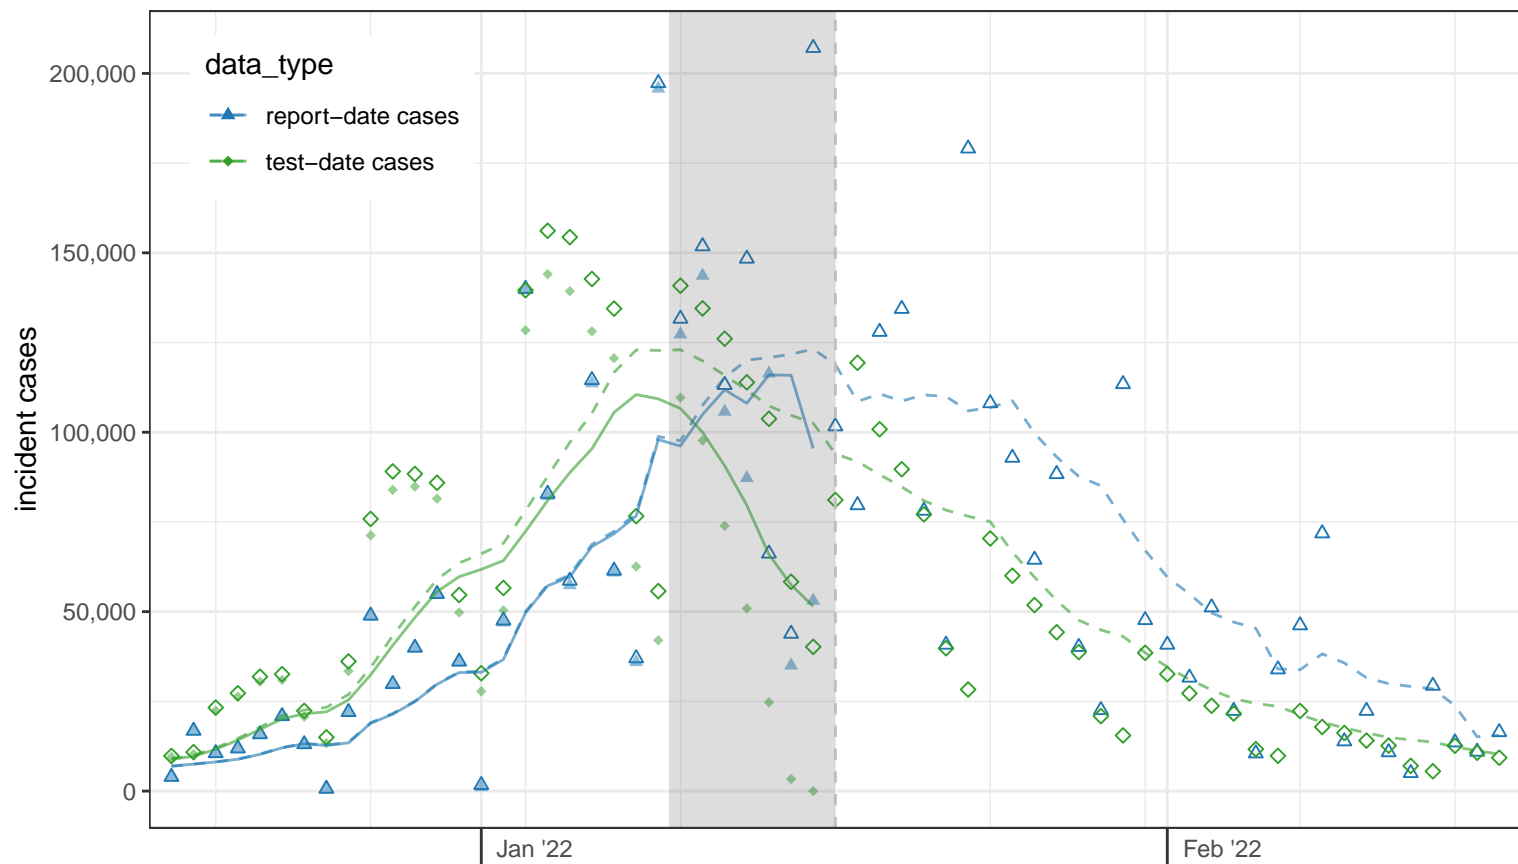

California case data as of: 2022-01-24

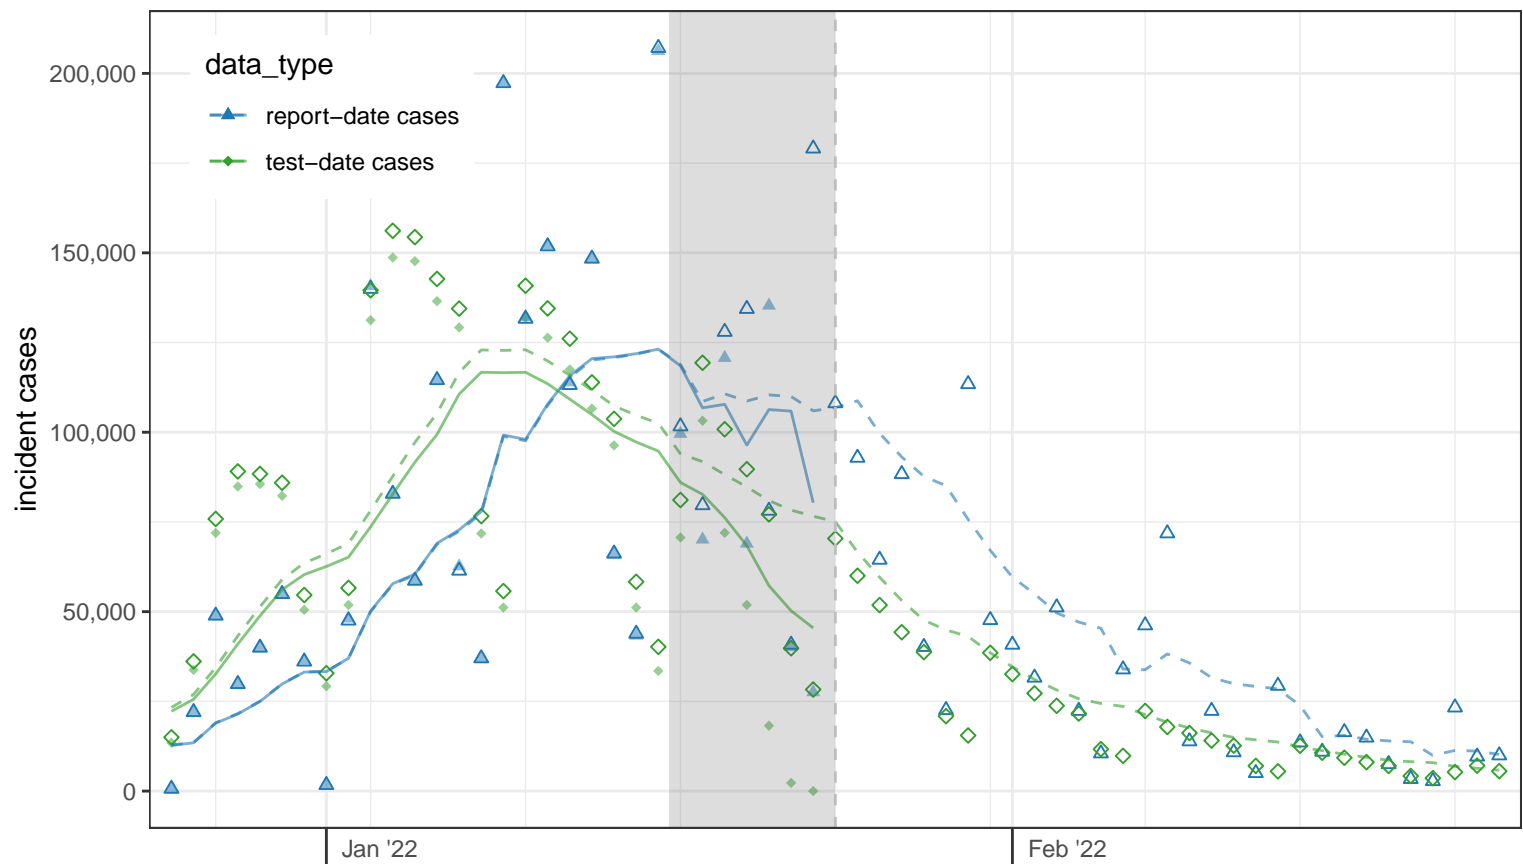

California case data as of: 2022-01-31

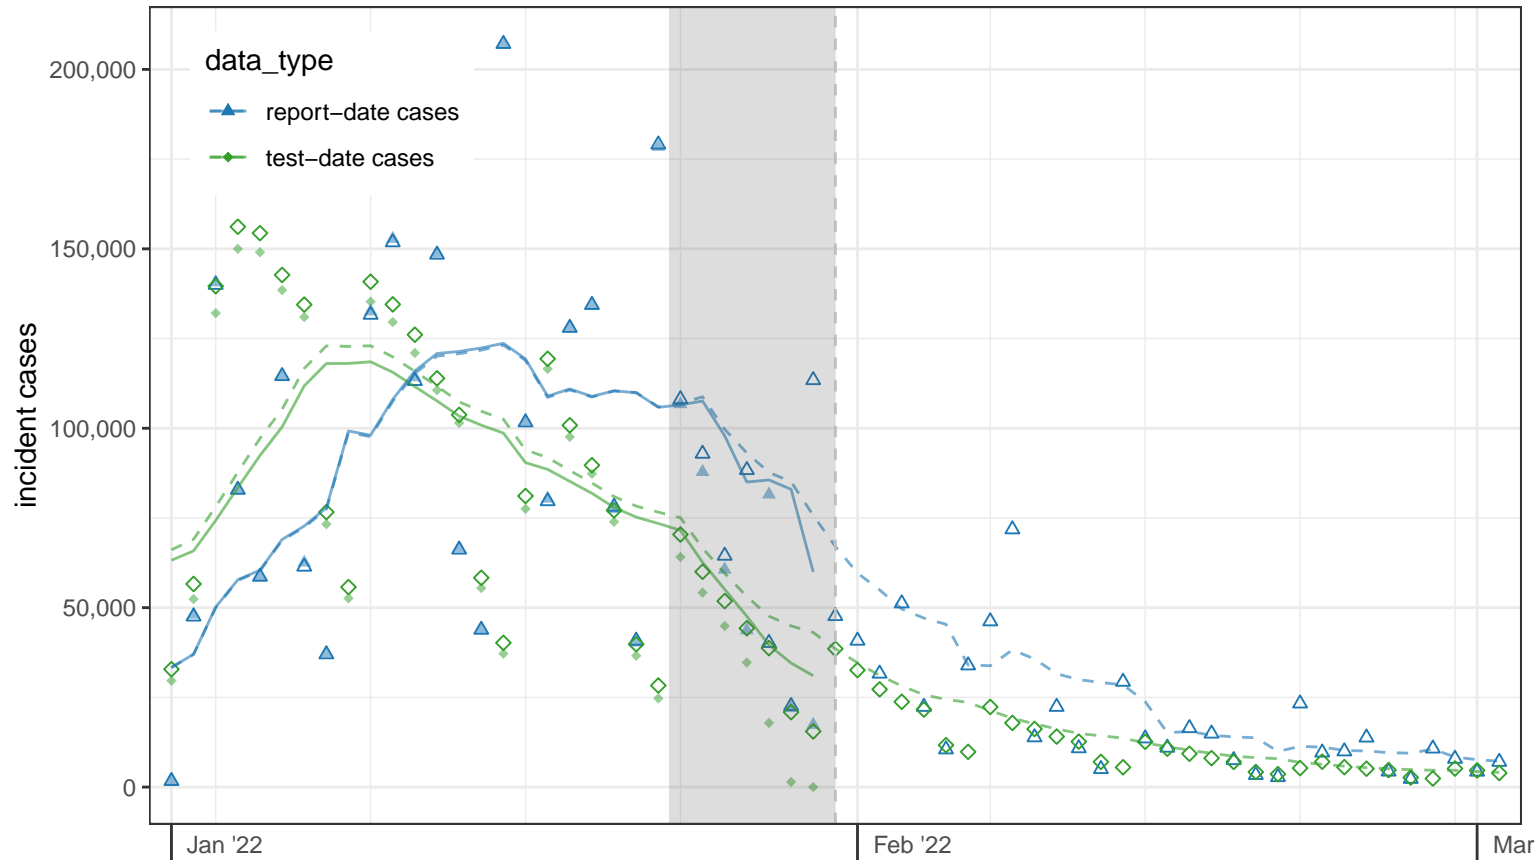

California case data as of: 2022-02-07

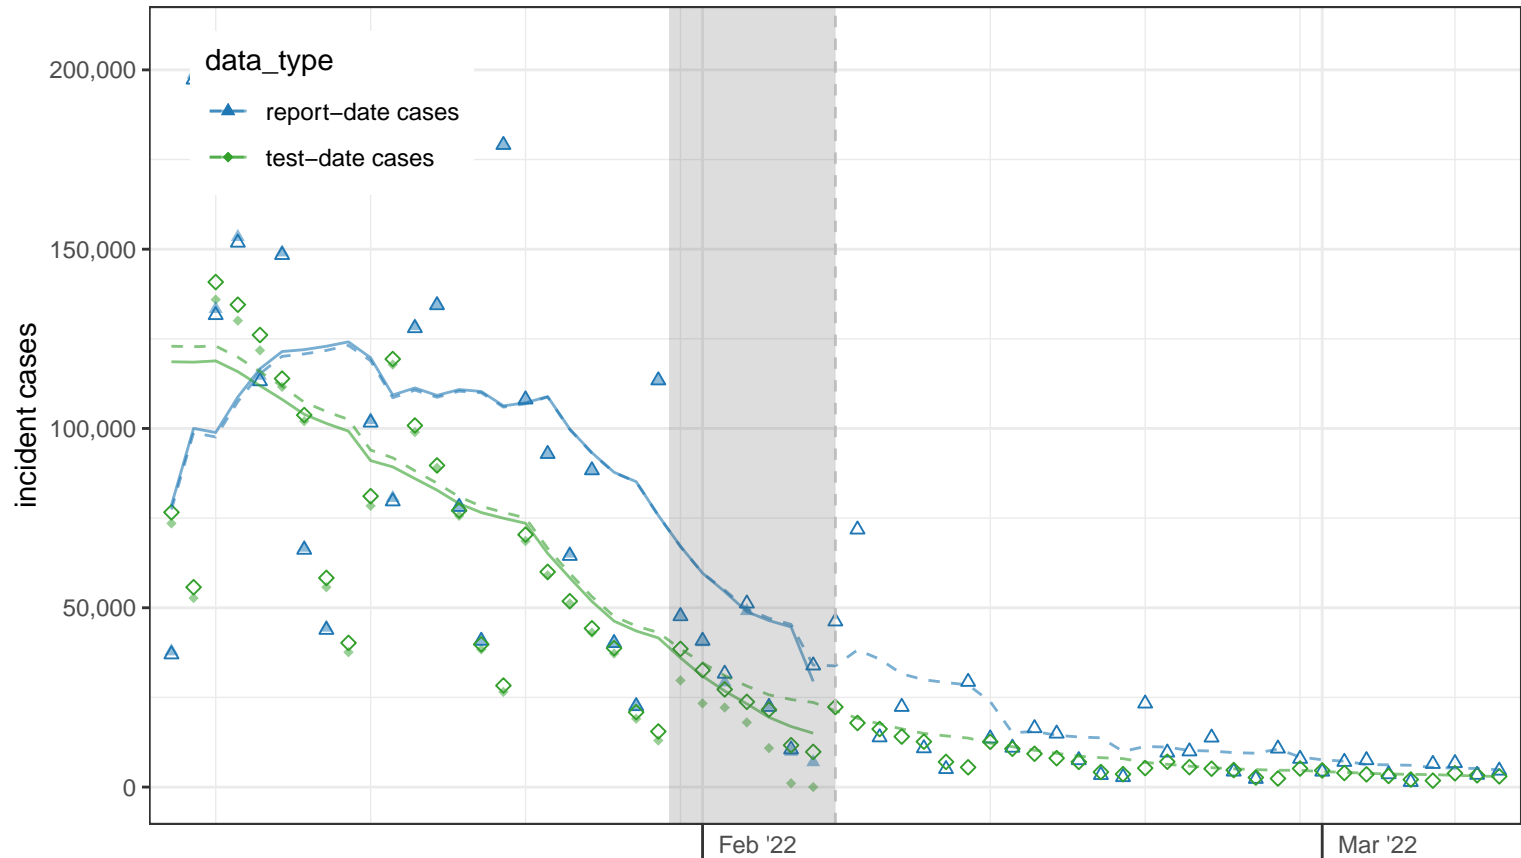



California case data as of: 2022-02-14

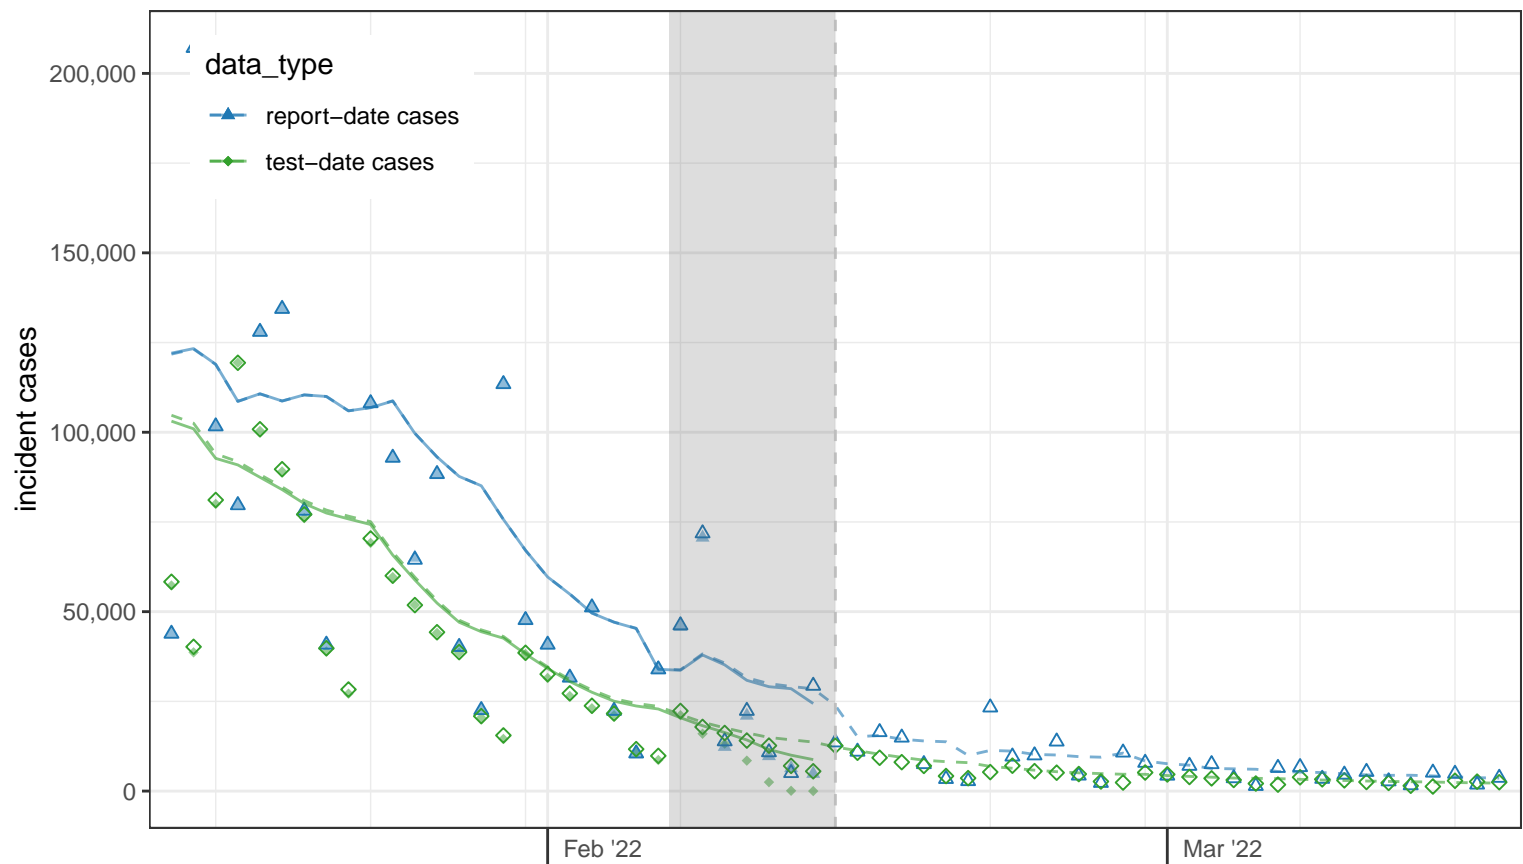

# California case data as of: 2022-02-28

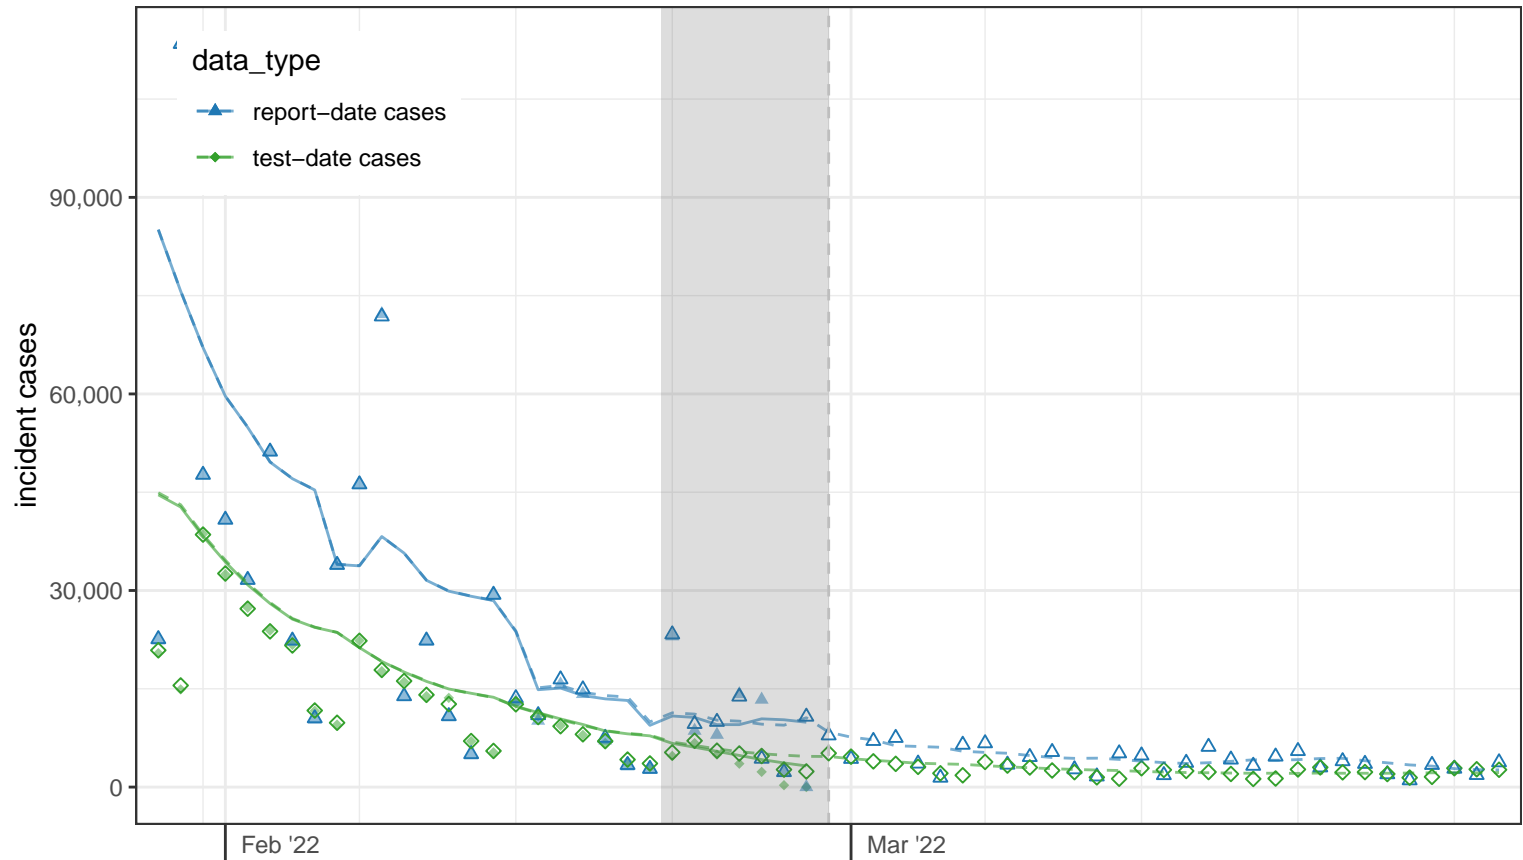

# California case data as of: 2022-03-07

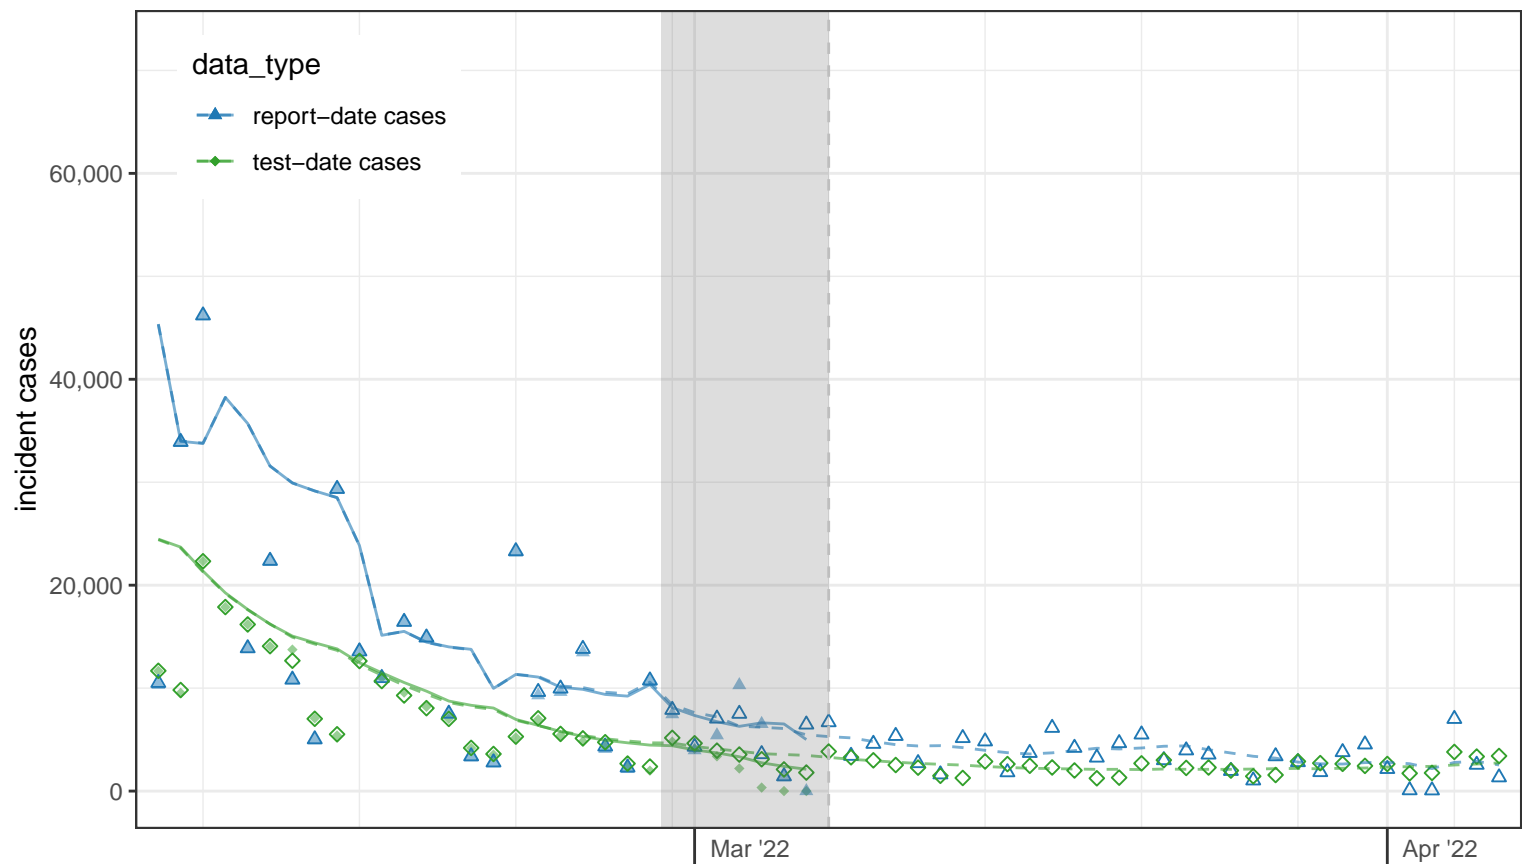

California case data as of: 2022-03-14

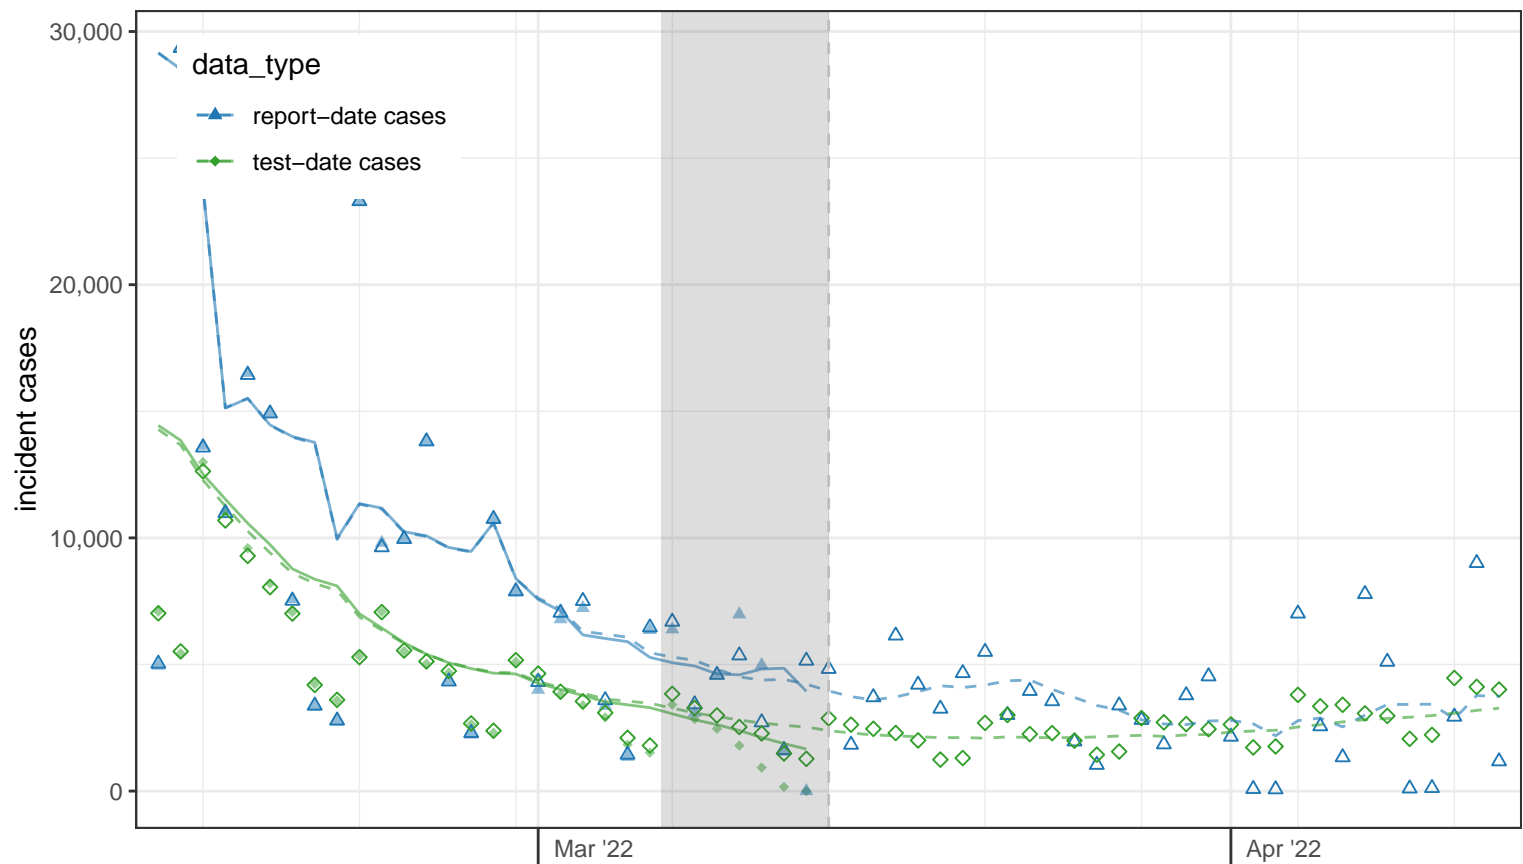

California case data as of: 2022-03-21

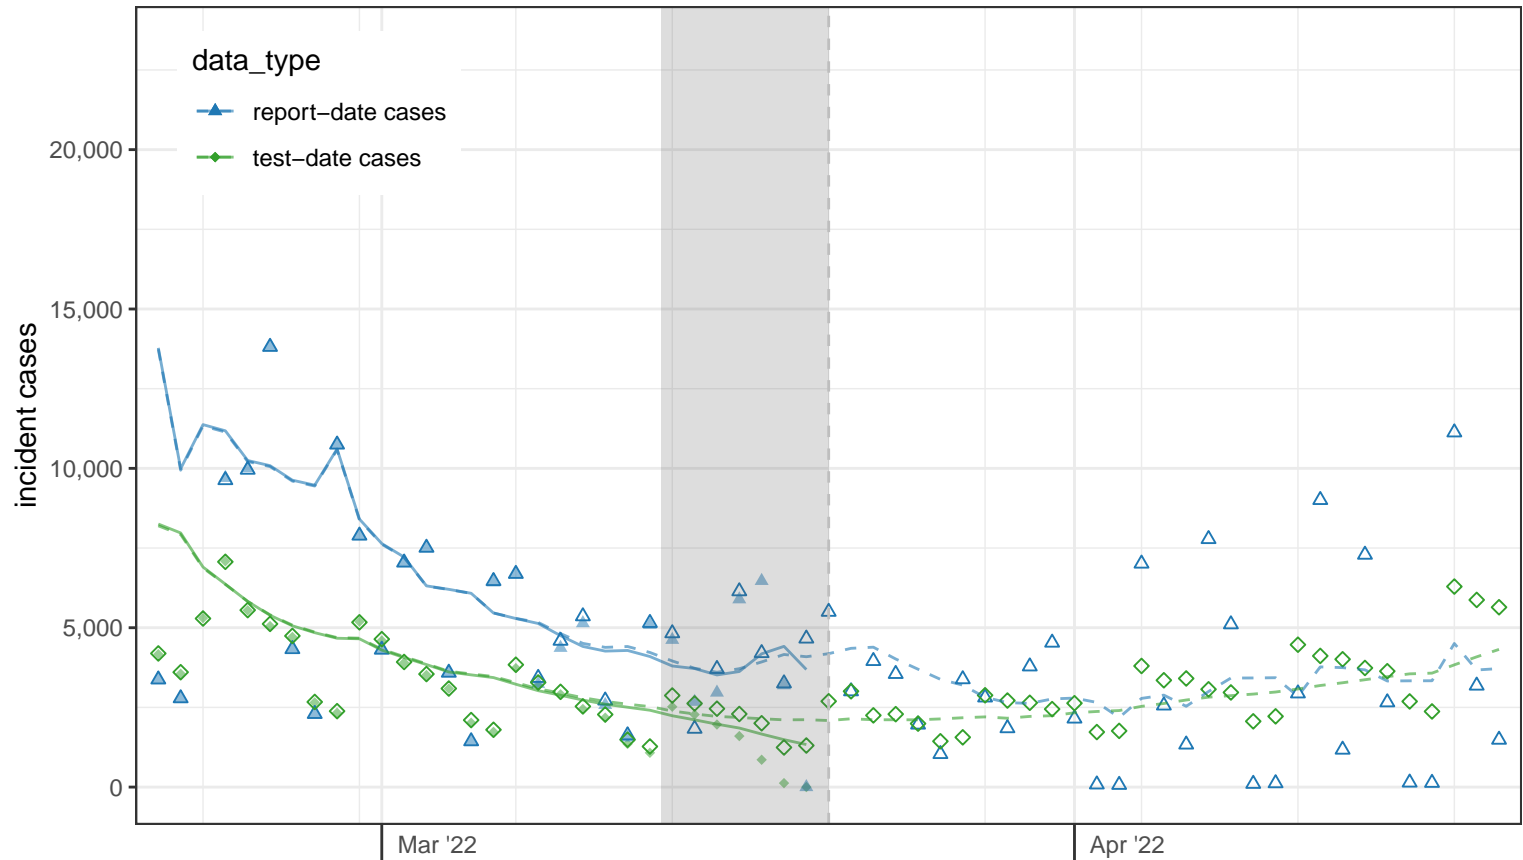

California case data as of: 2022-03-28

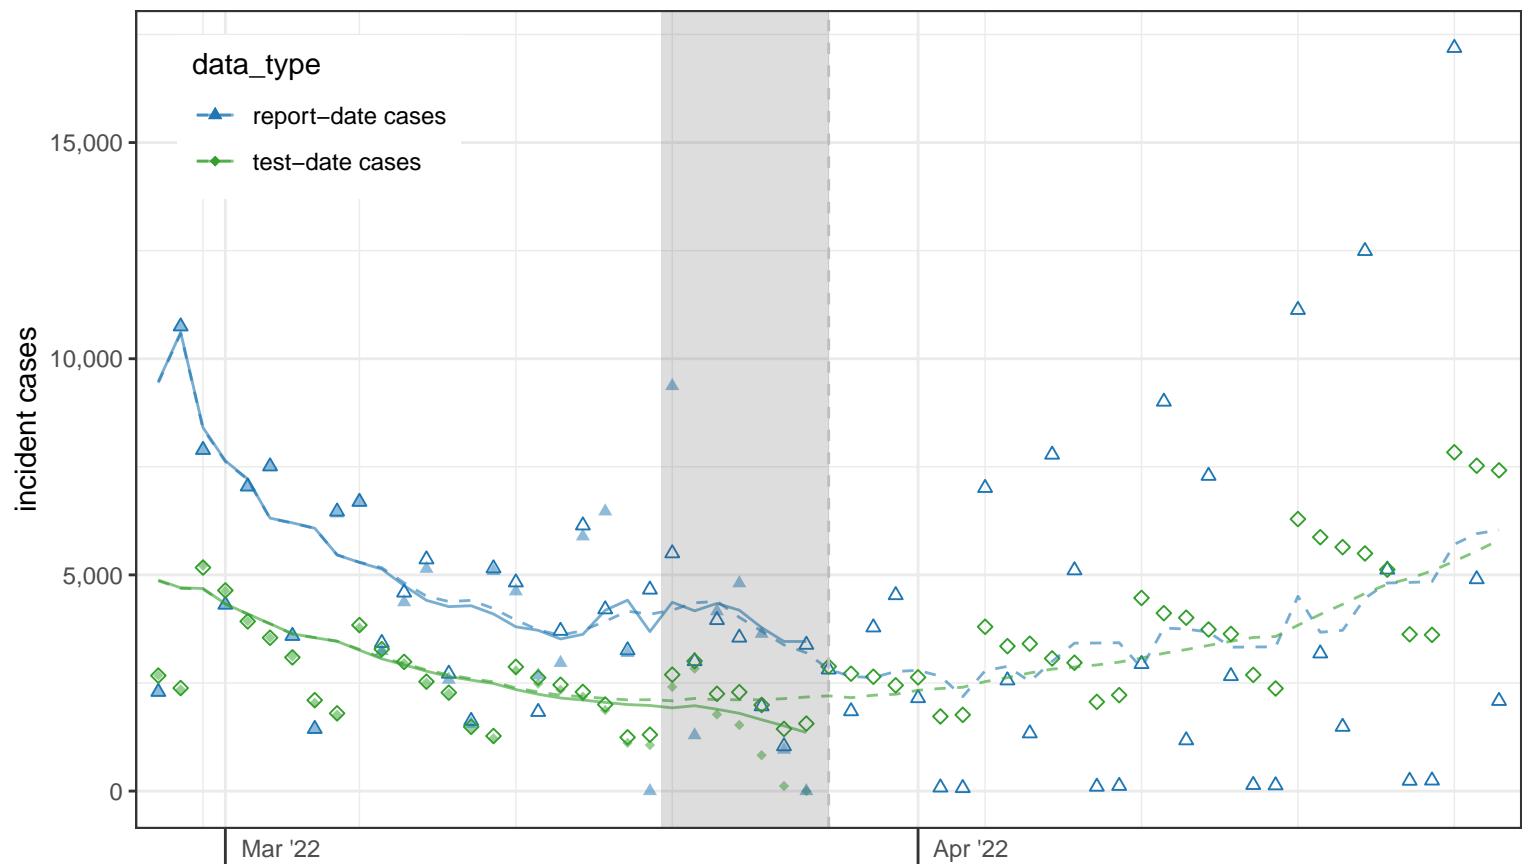

# Massachusetts case data as of: 2021-01-04

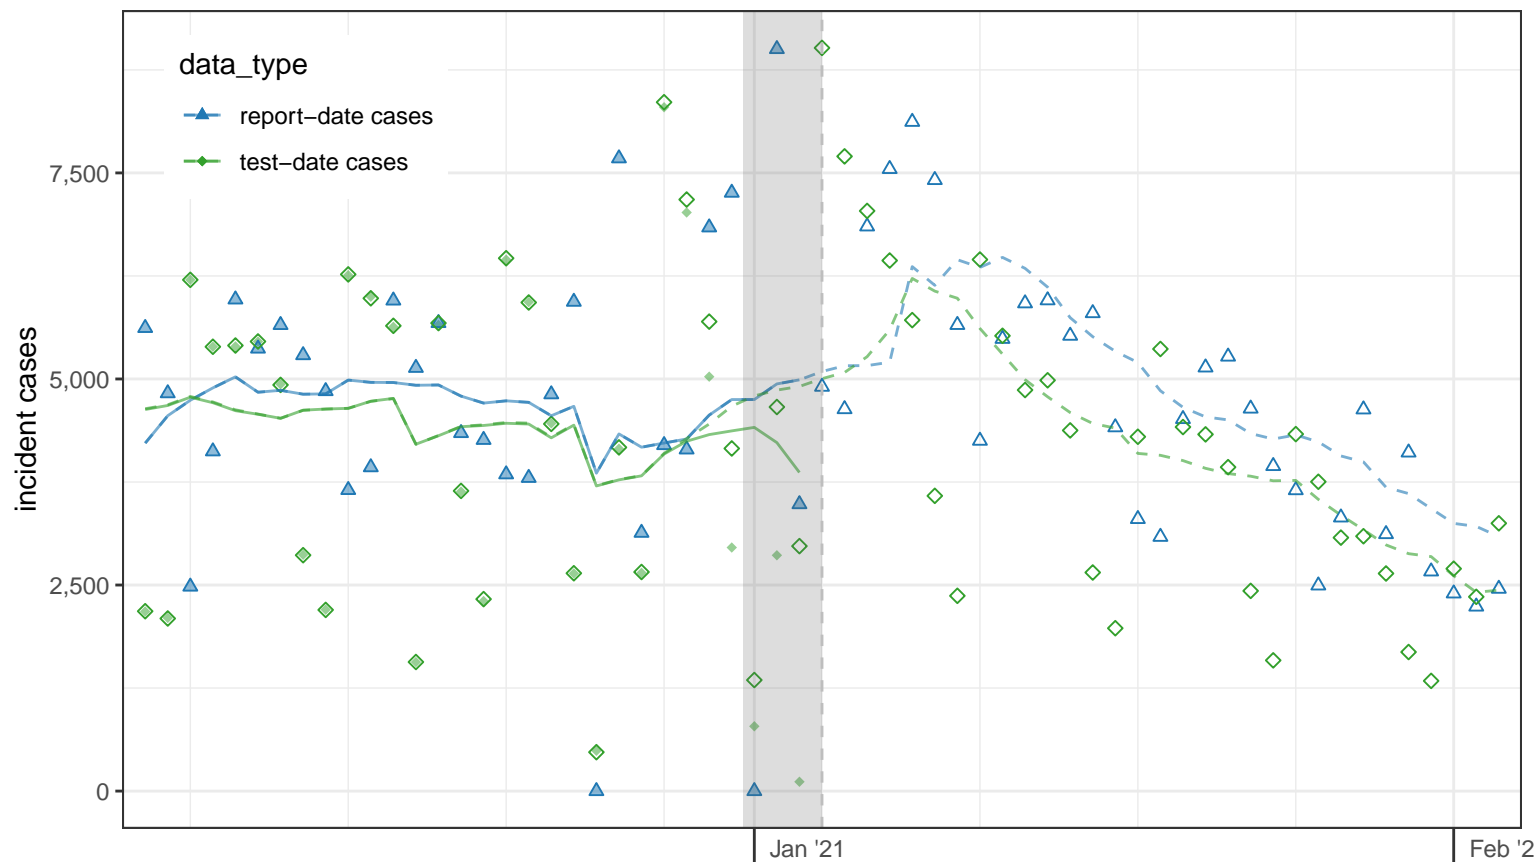

# Massachusetts case data as of: 2021-01-11

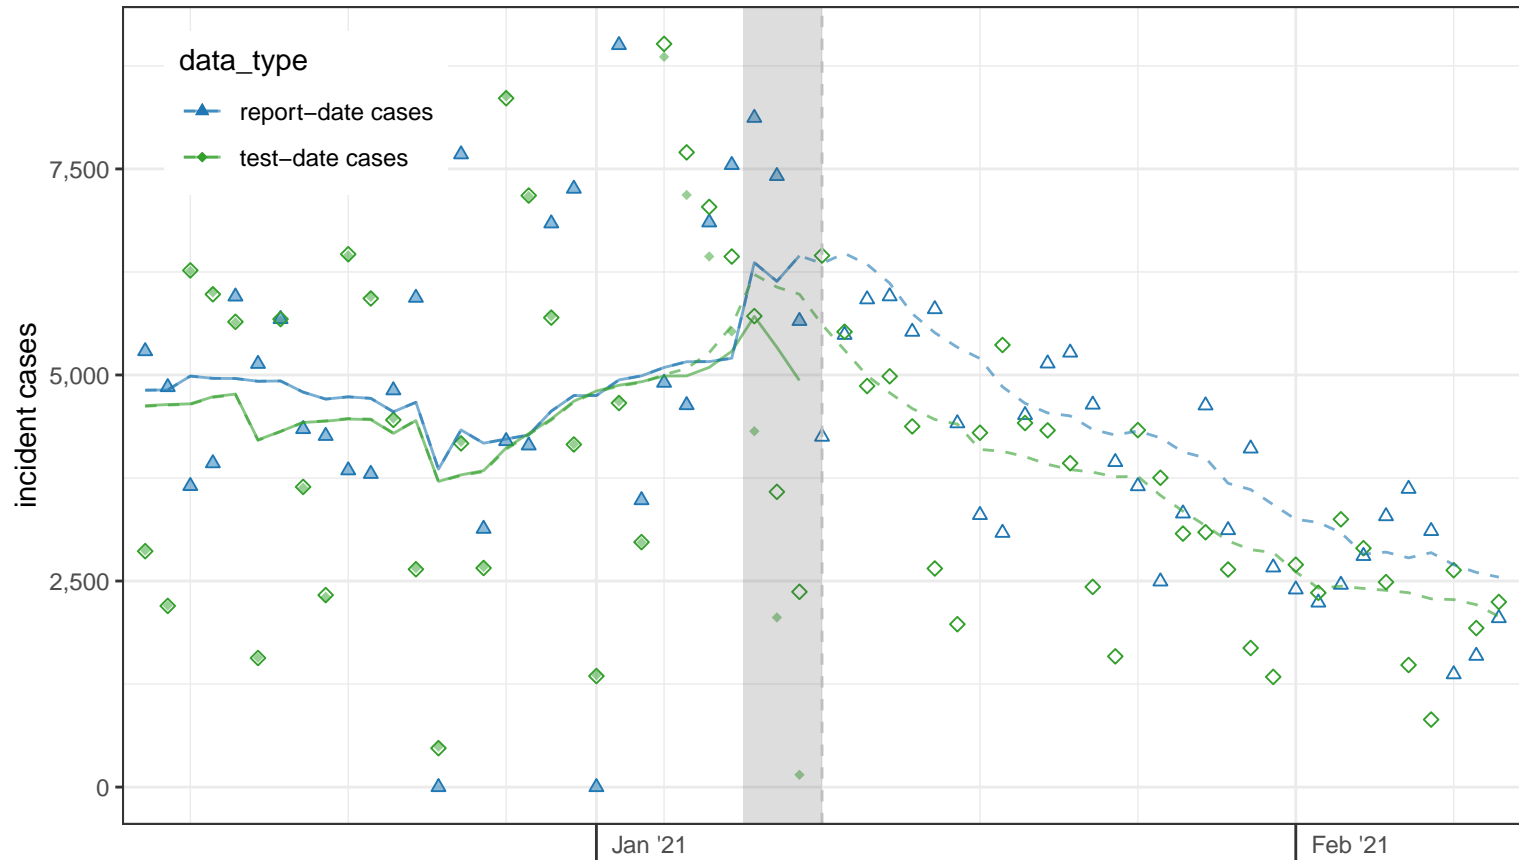



# Massachusetts case data as of: 2021-01-18

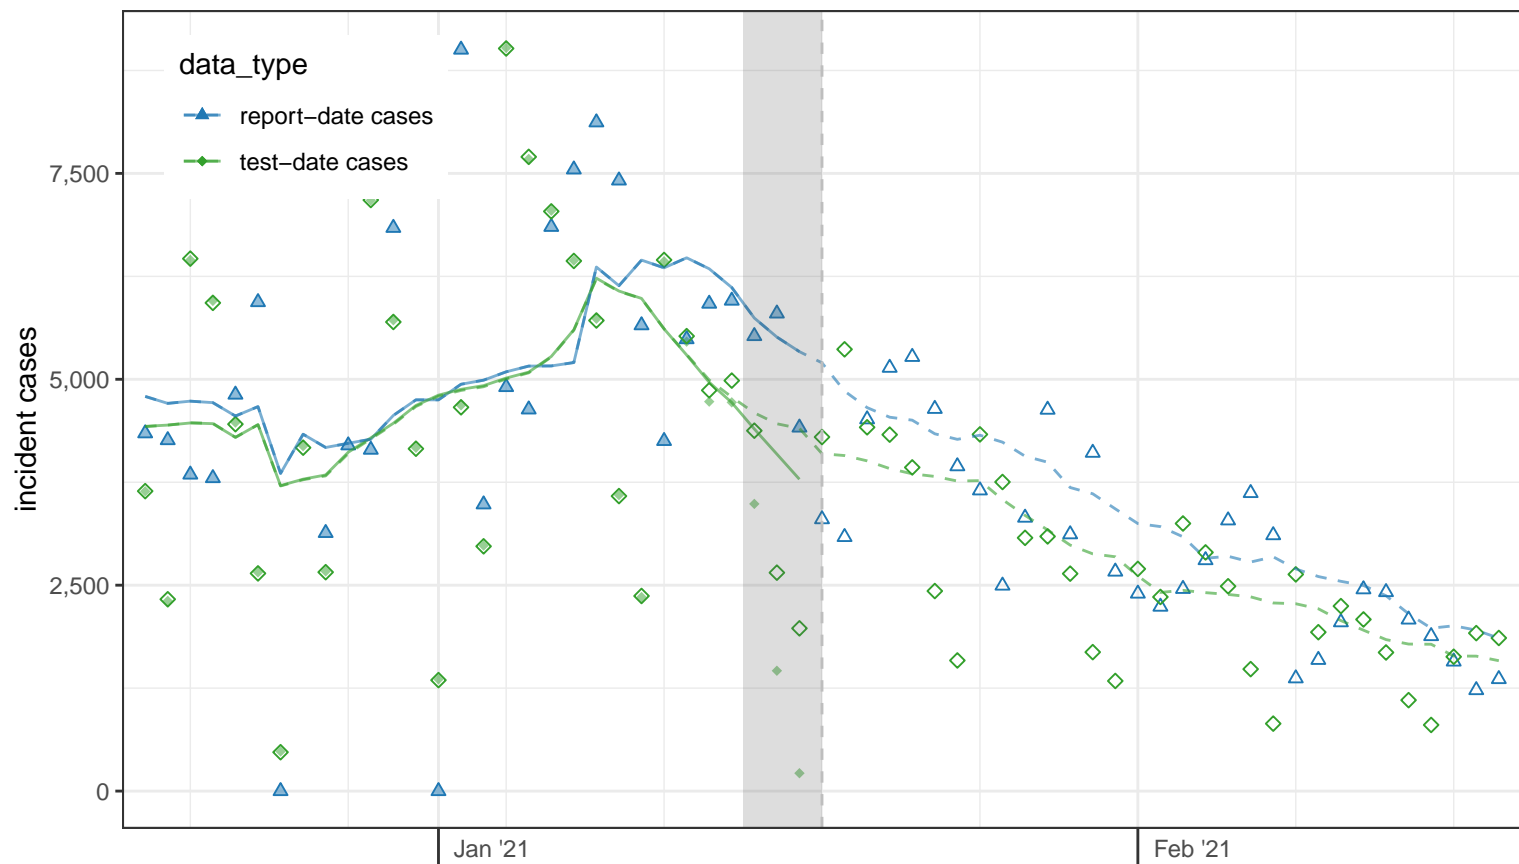

Massachusetts case data as of: 2021-01-25

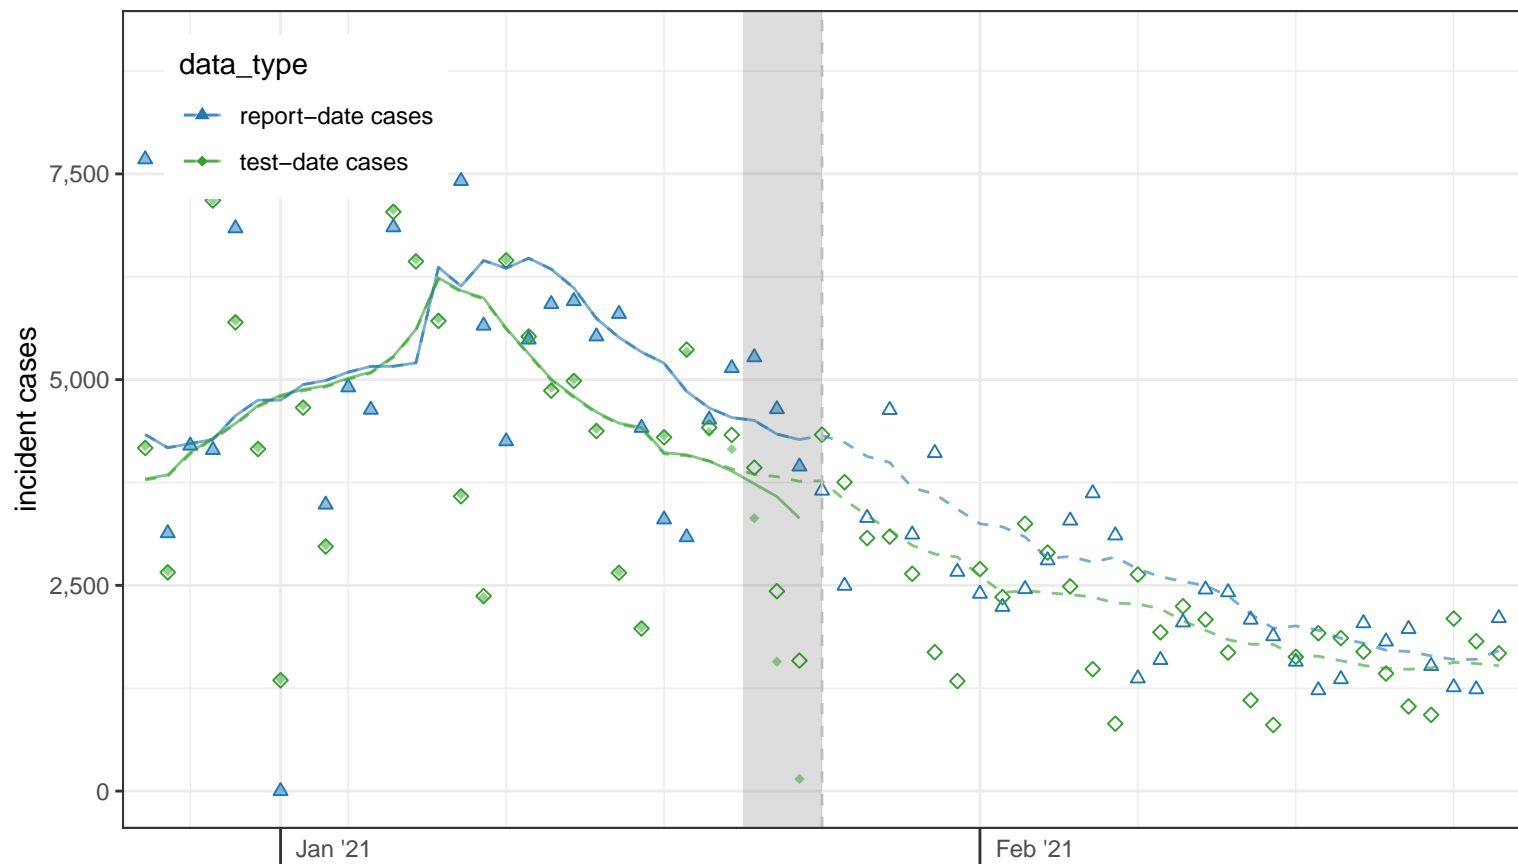

# Massachusetts case data as of: 2021-02-01

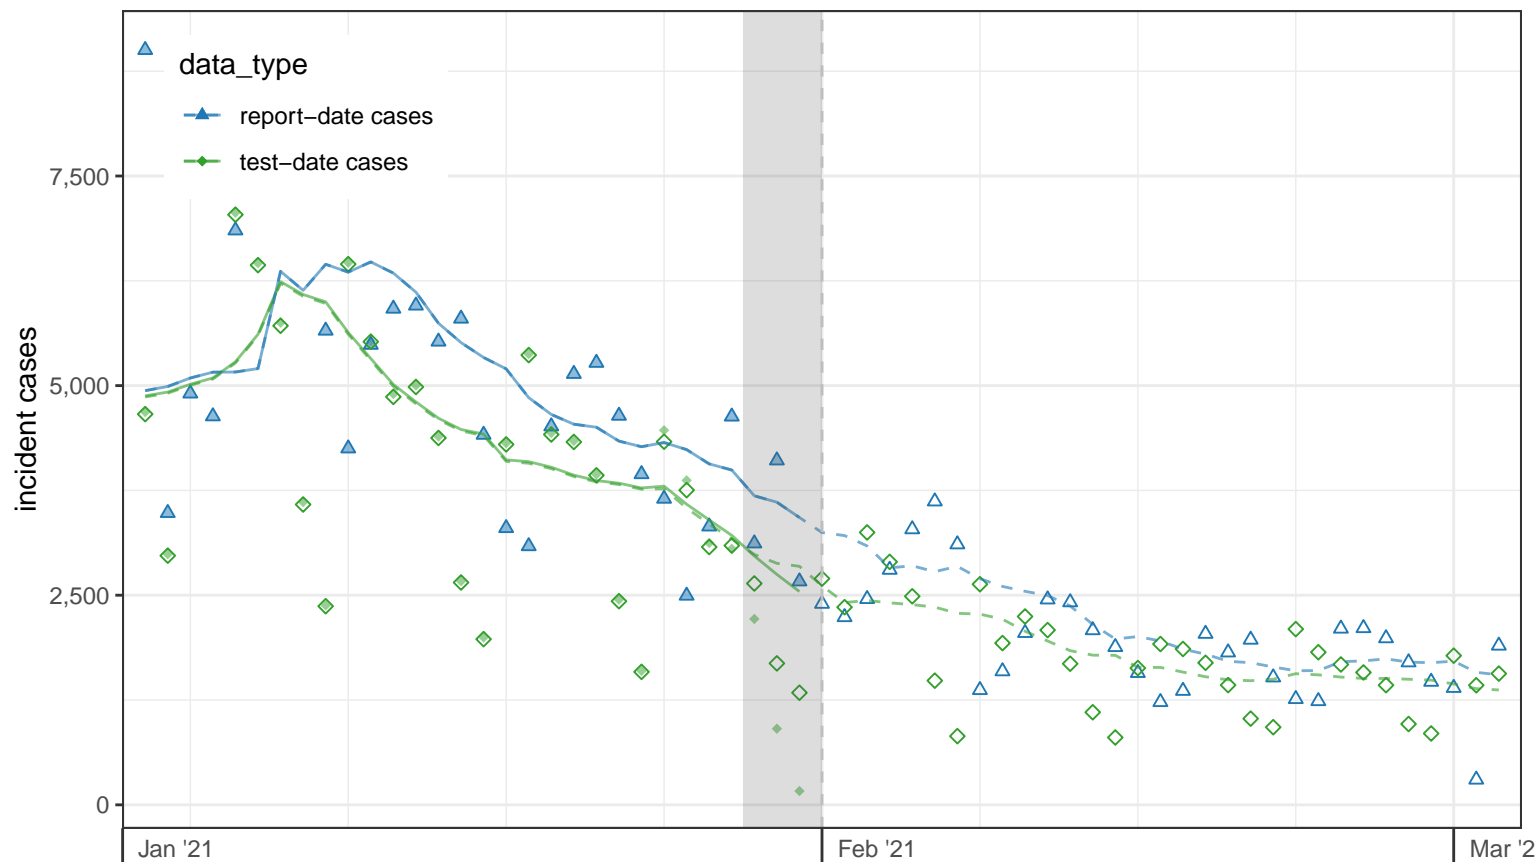

# Massachusetts case data as of: 2021-02-08

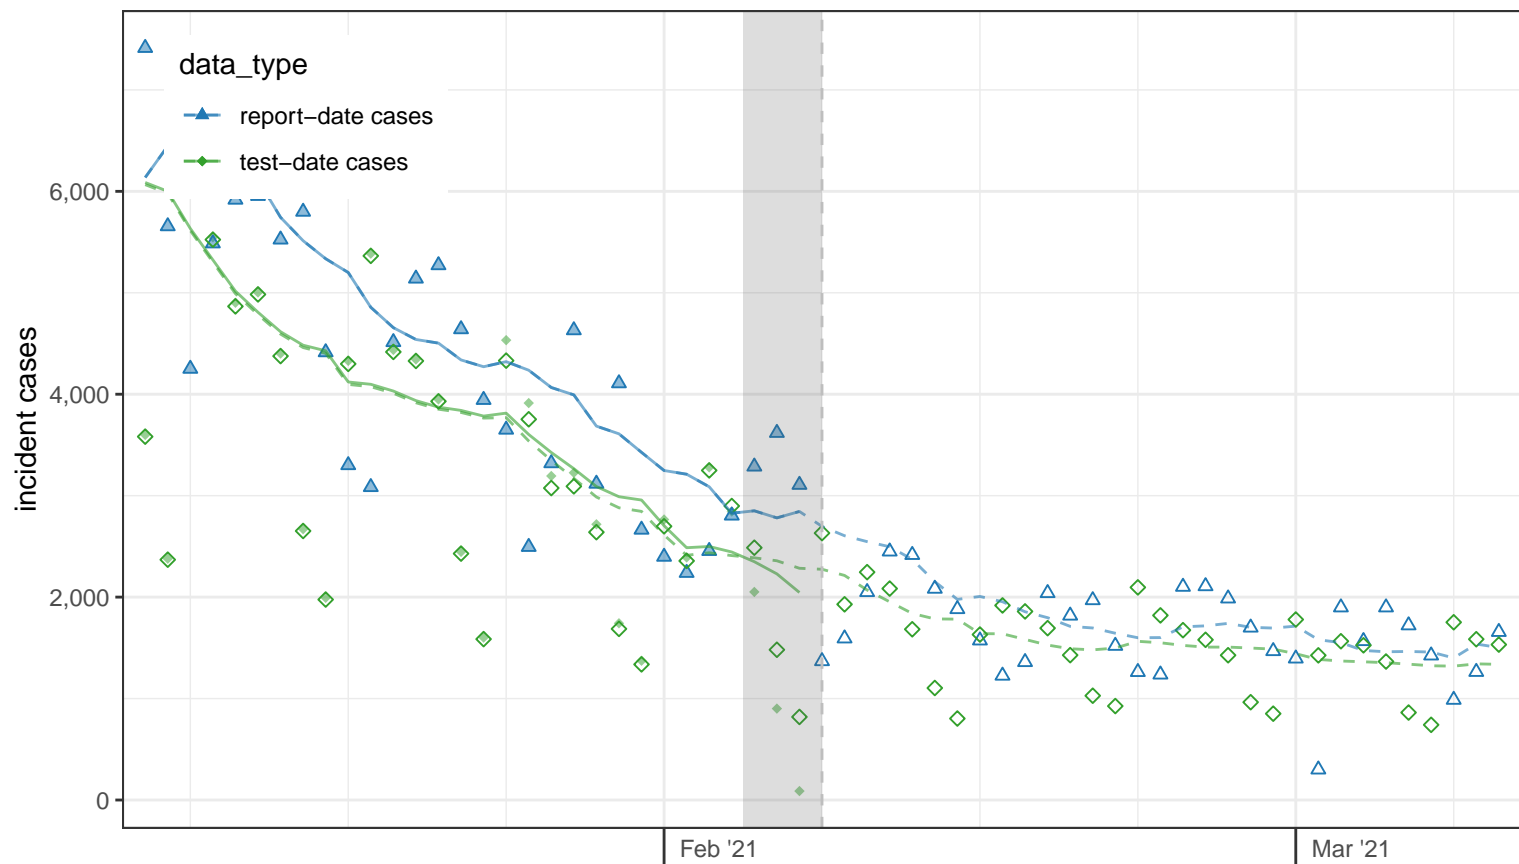

Massachusetts case data as of: 2021-02-15

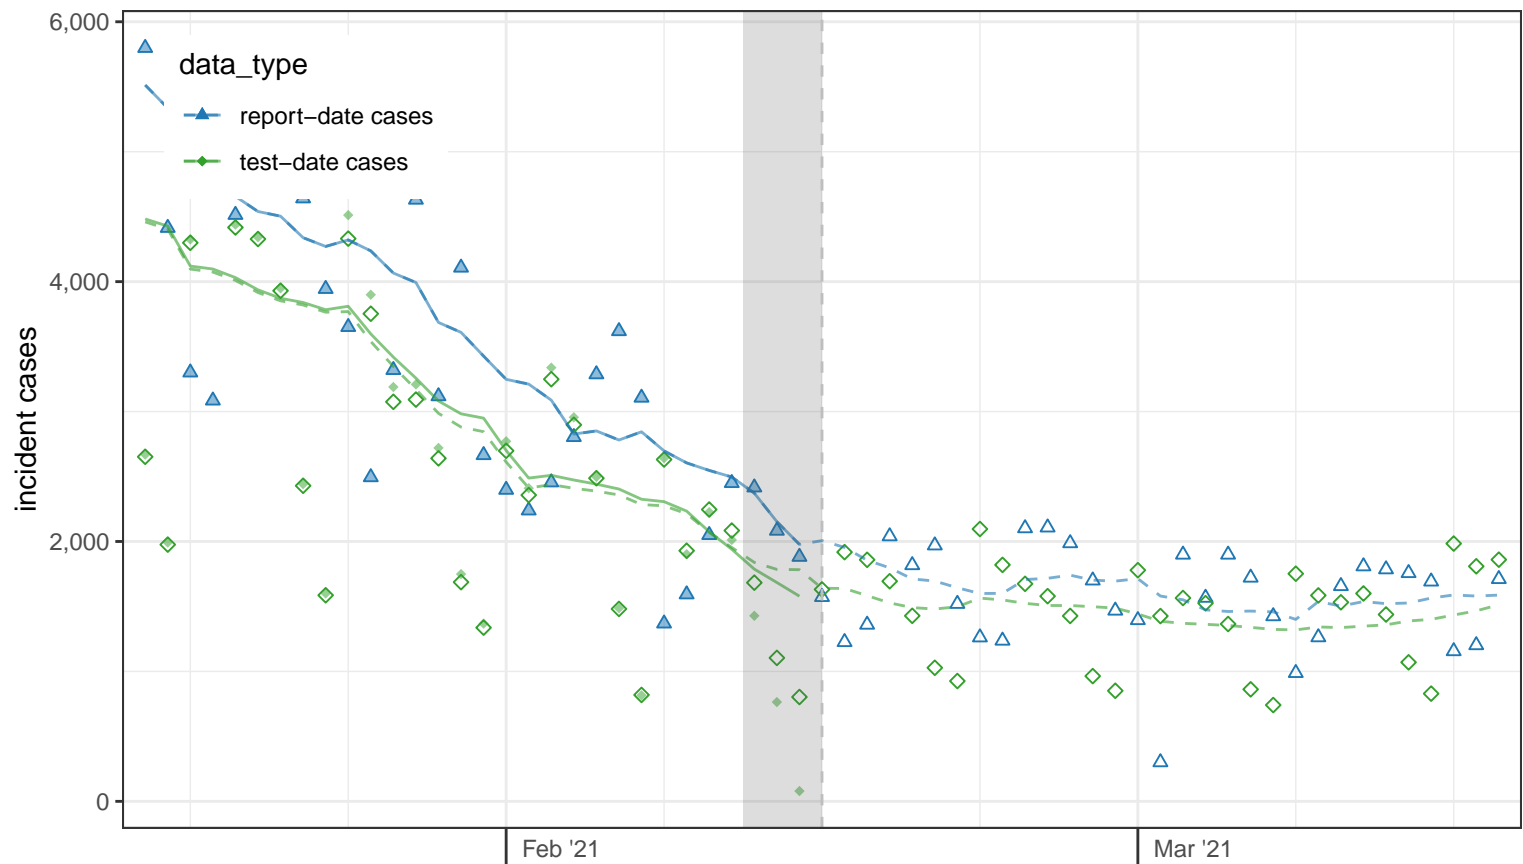

Massachusetts case data as of: 2021-02-22

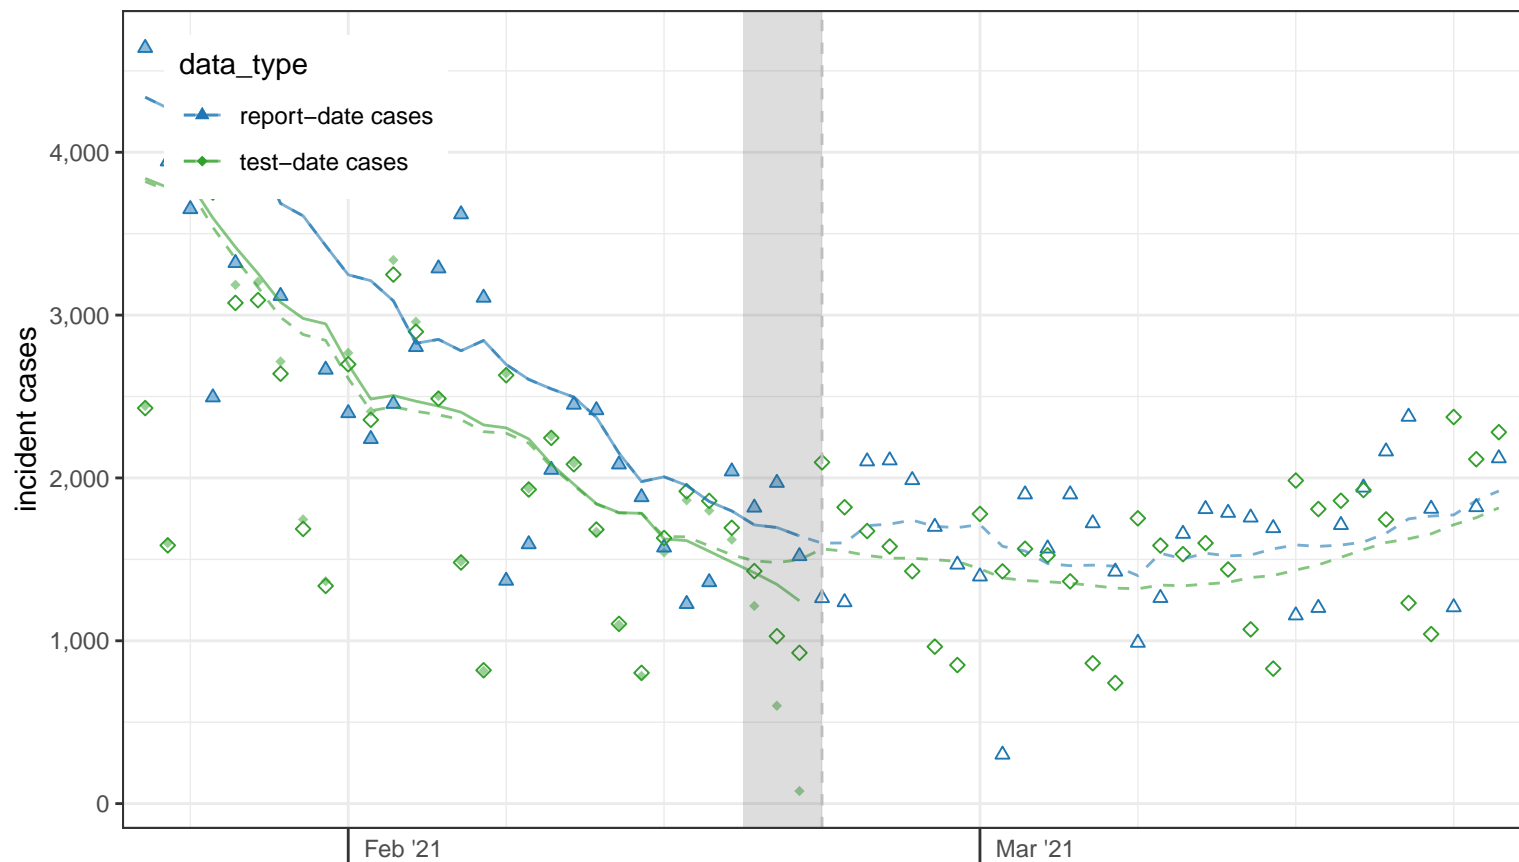

Massachusetts case data as of: 2021-03-01

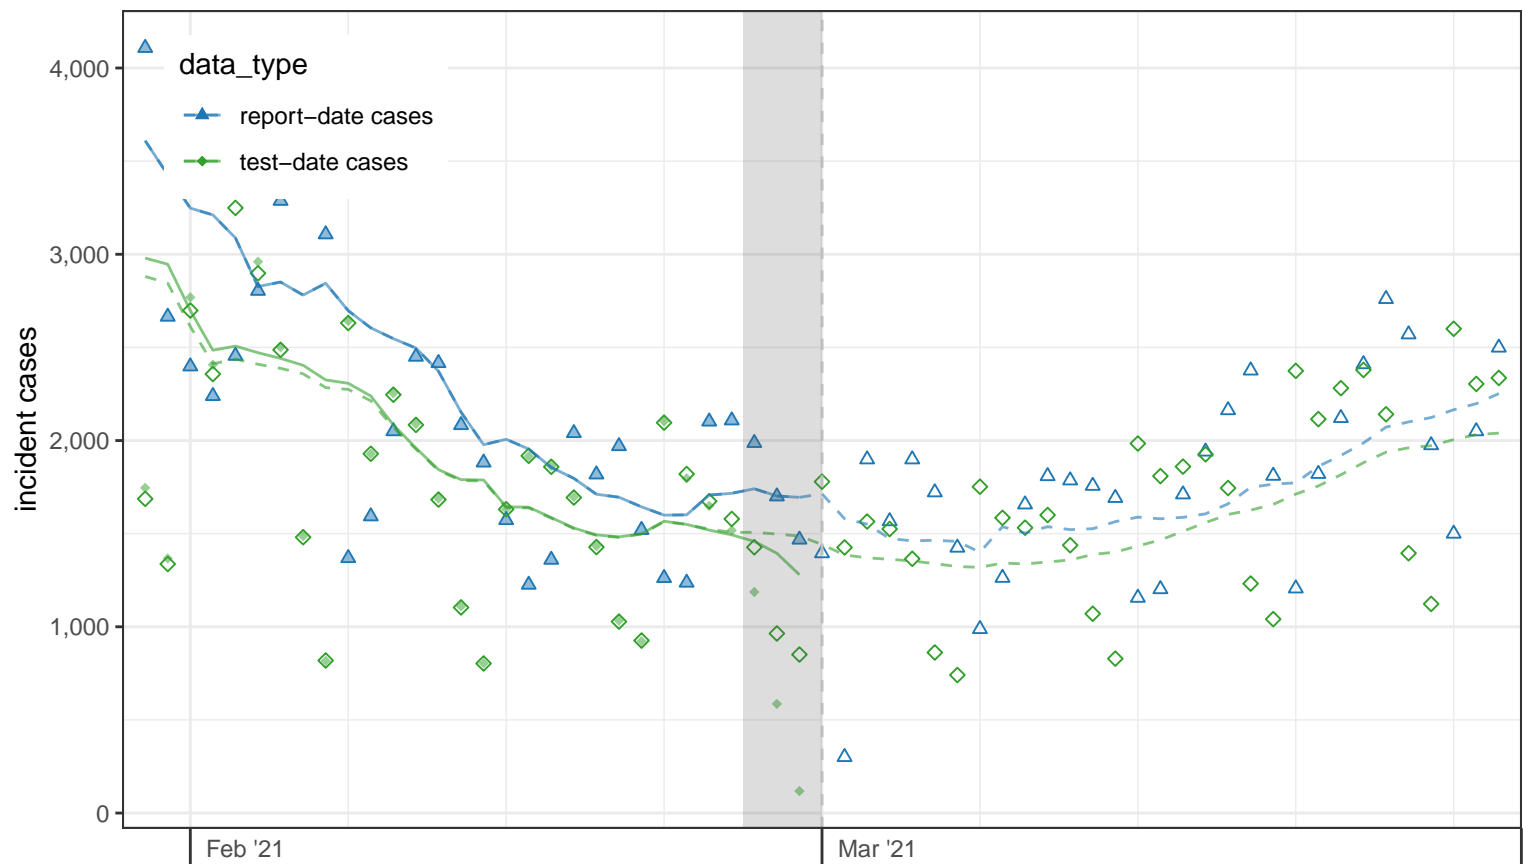

# Massachusetts case data as of: 2021-03-08

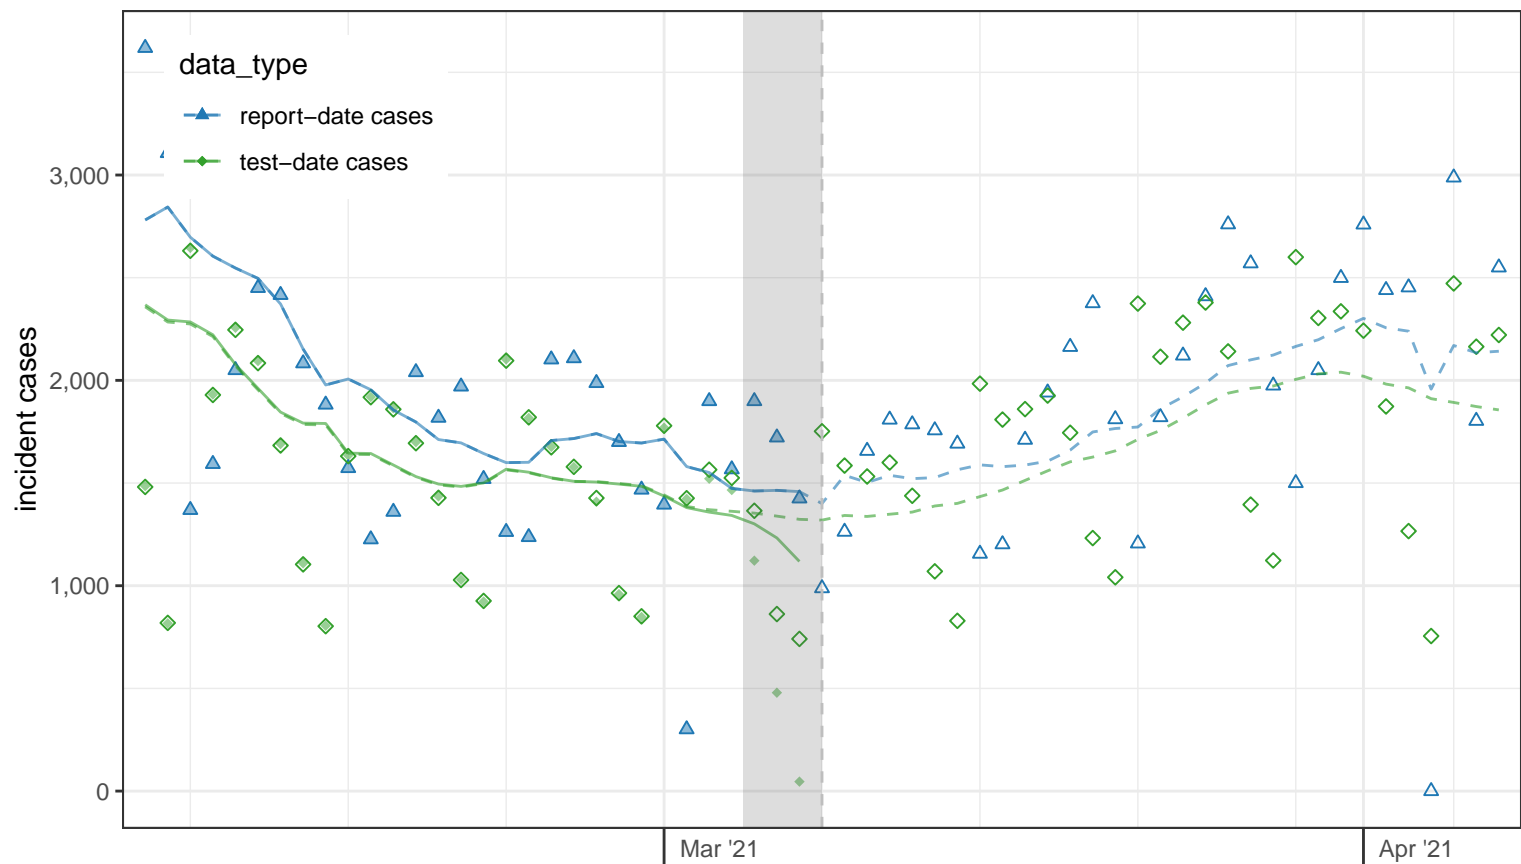



Massachusetts case data as of: 2021-03-15

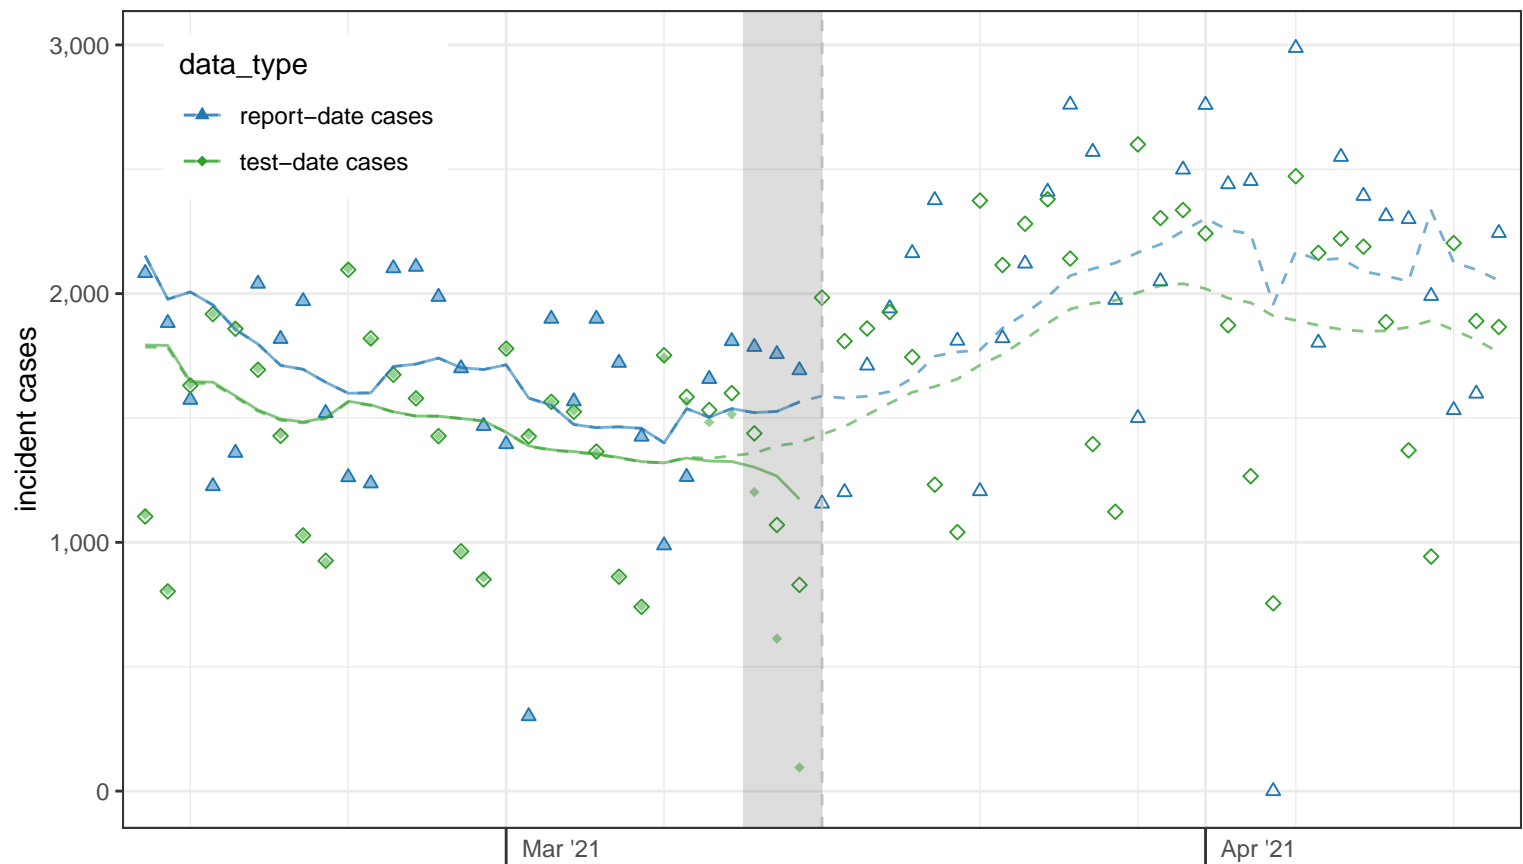

# Massachusetts case data as of: 2021-03-22

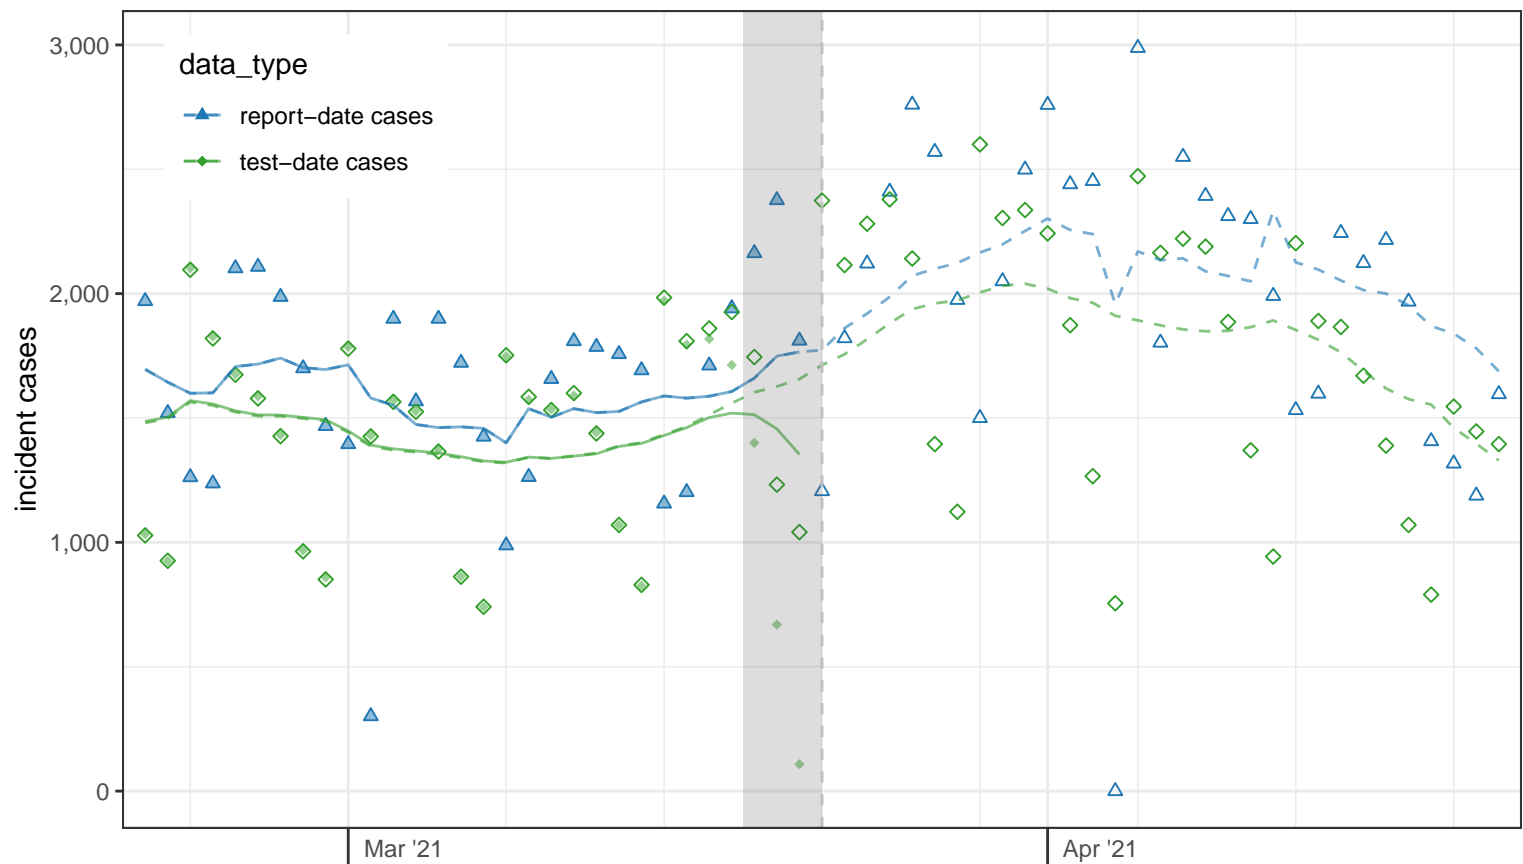

Massachusetts case data as of: 2021-03-29

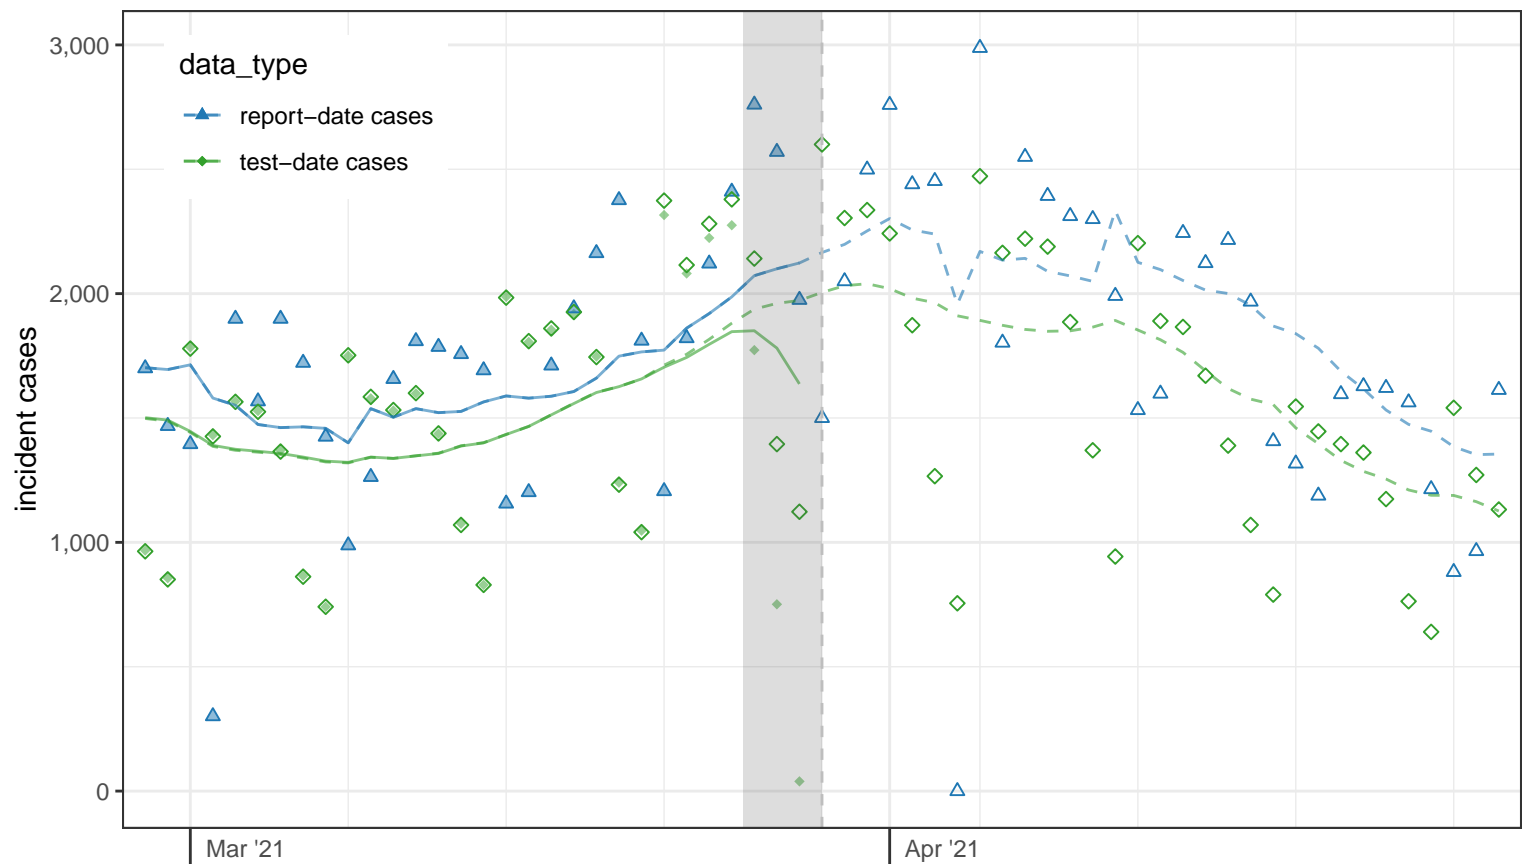

# Massachusetts case data as of: 2021-04-05

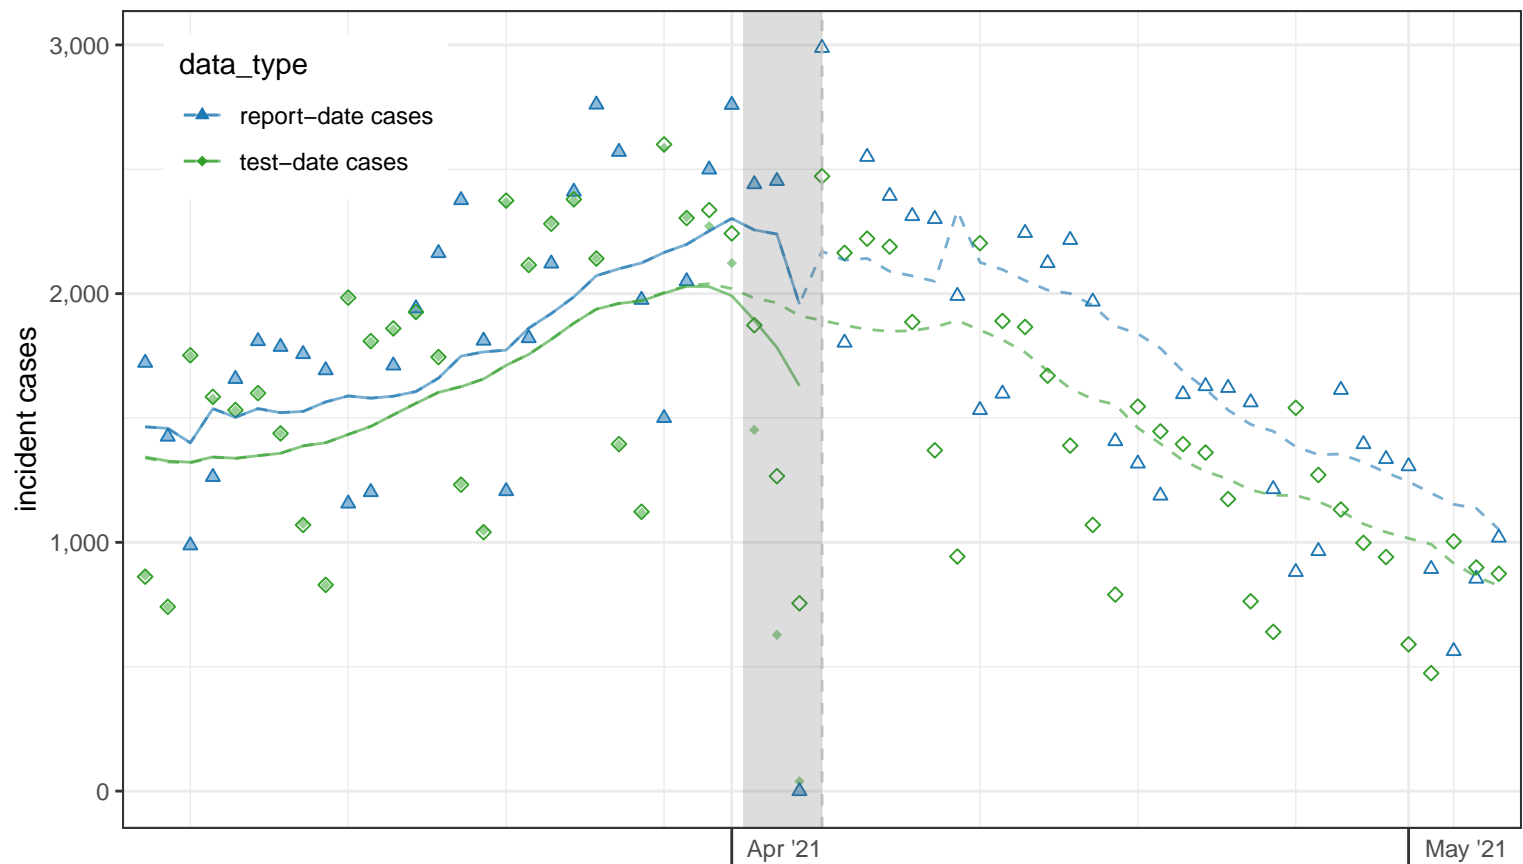

Massachusetts case data as of: 2021-04-12

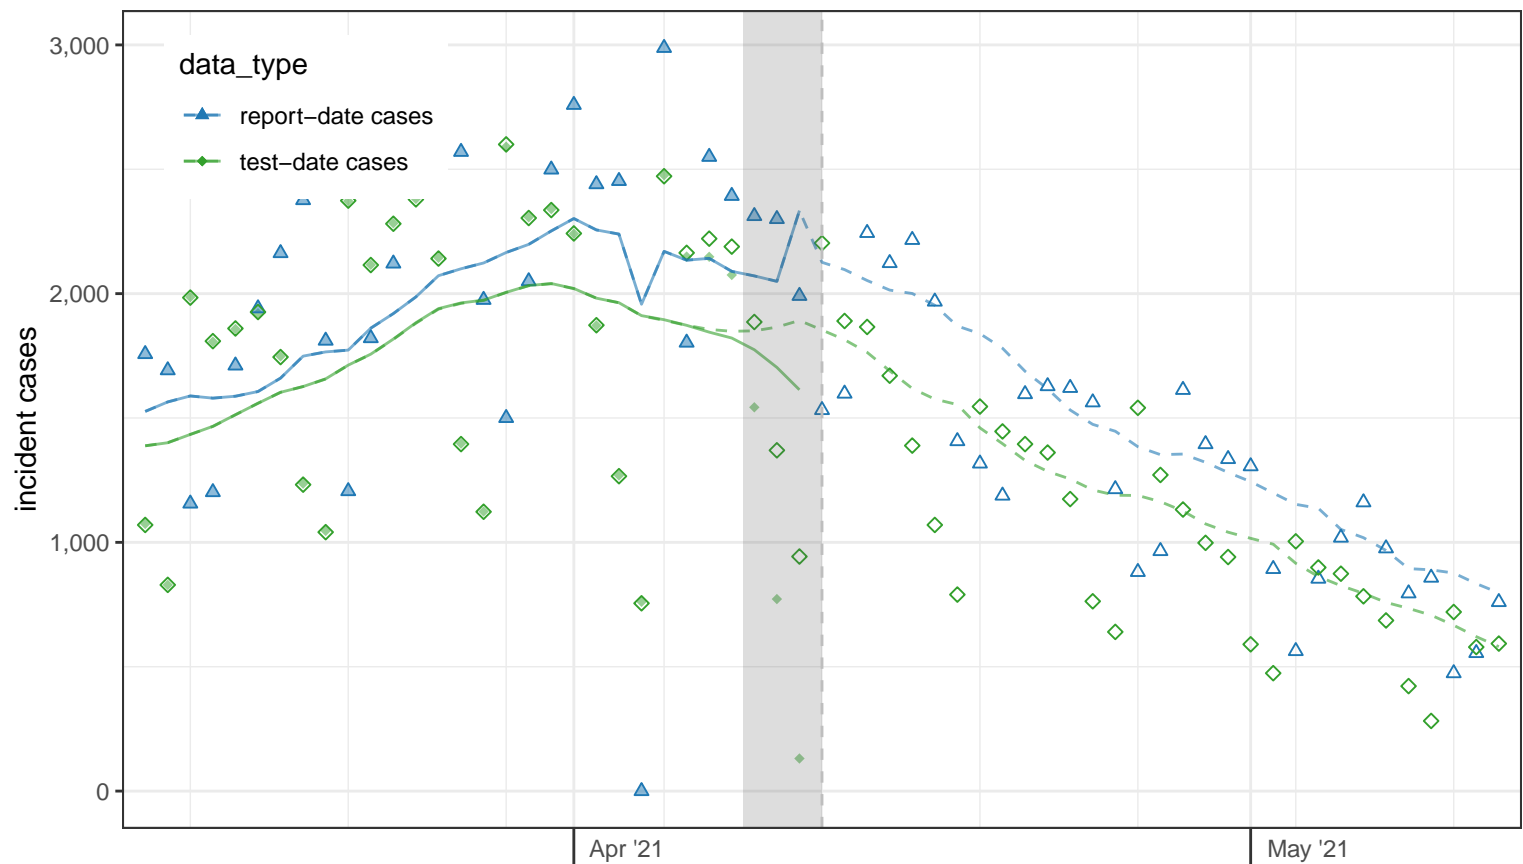

Massachusetts case data as of: 2021-04-19

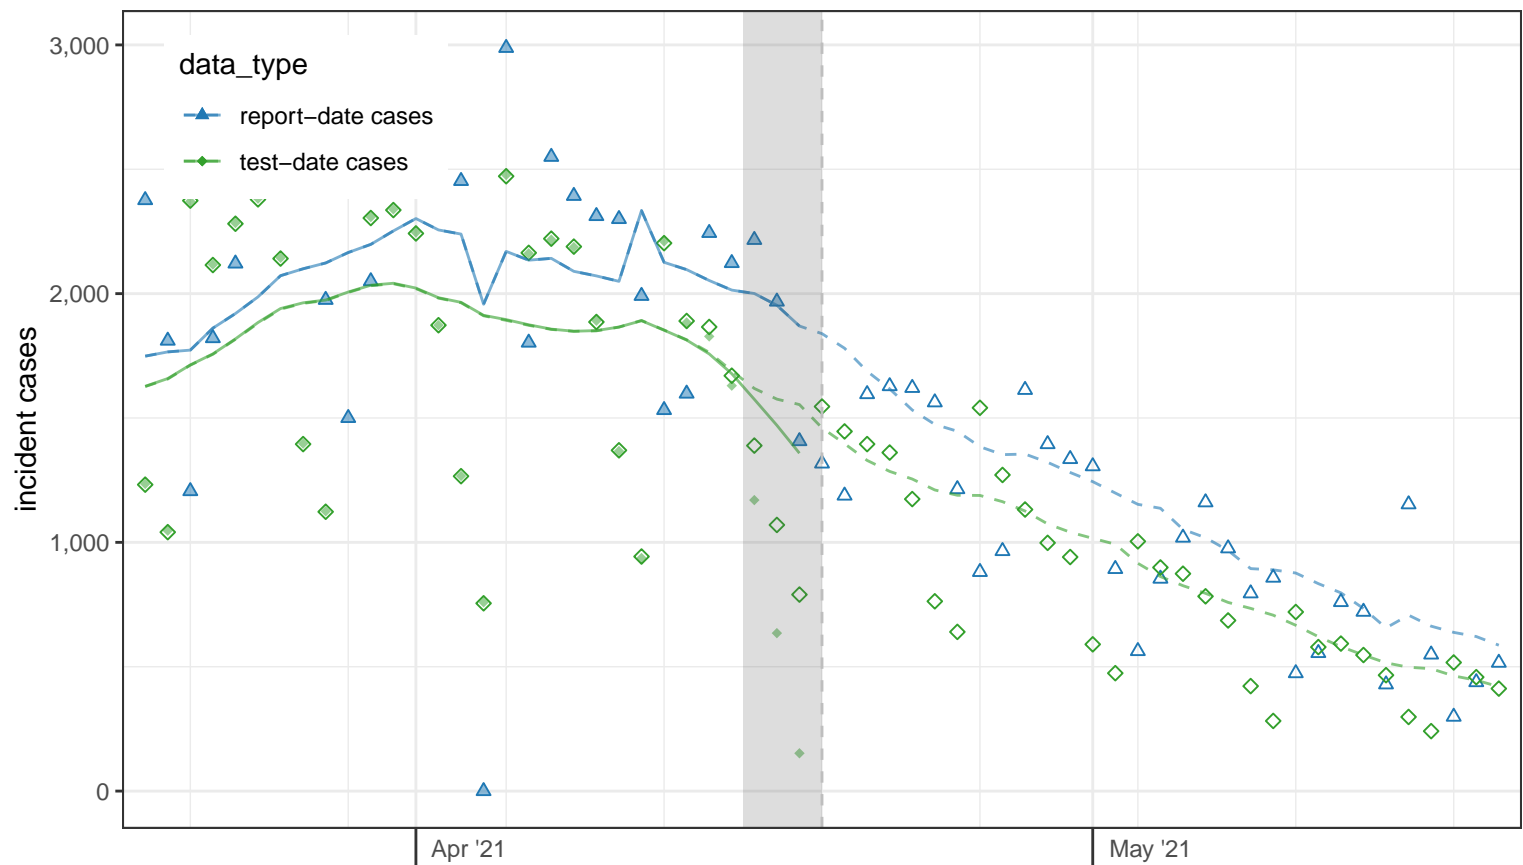

Massachusetts case data as of: 2021-04-26

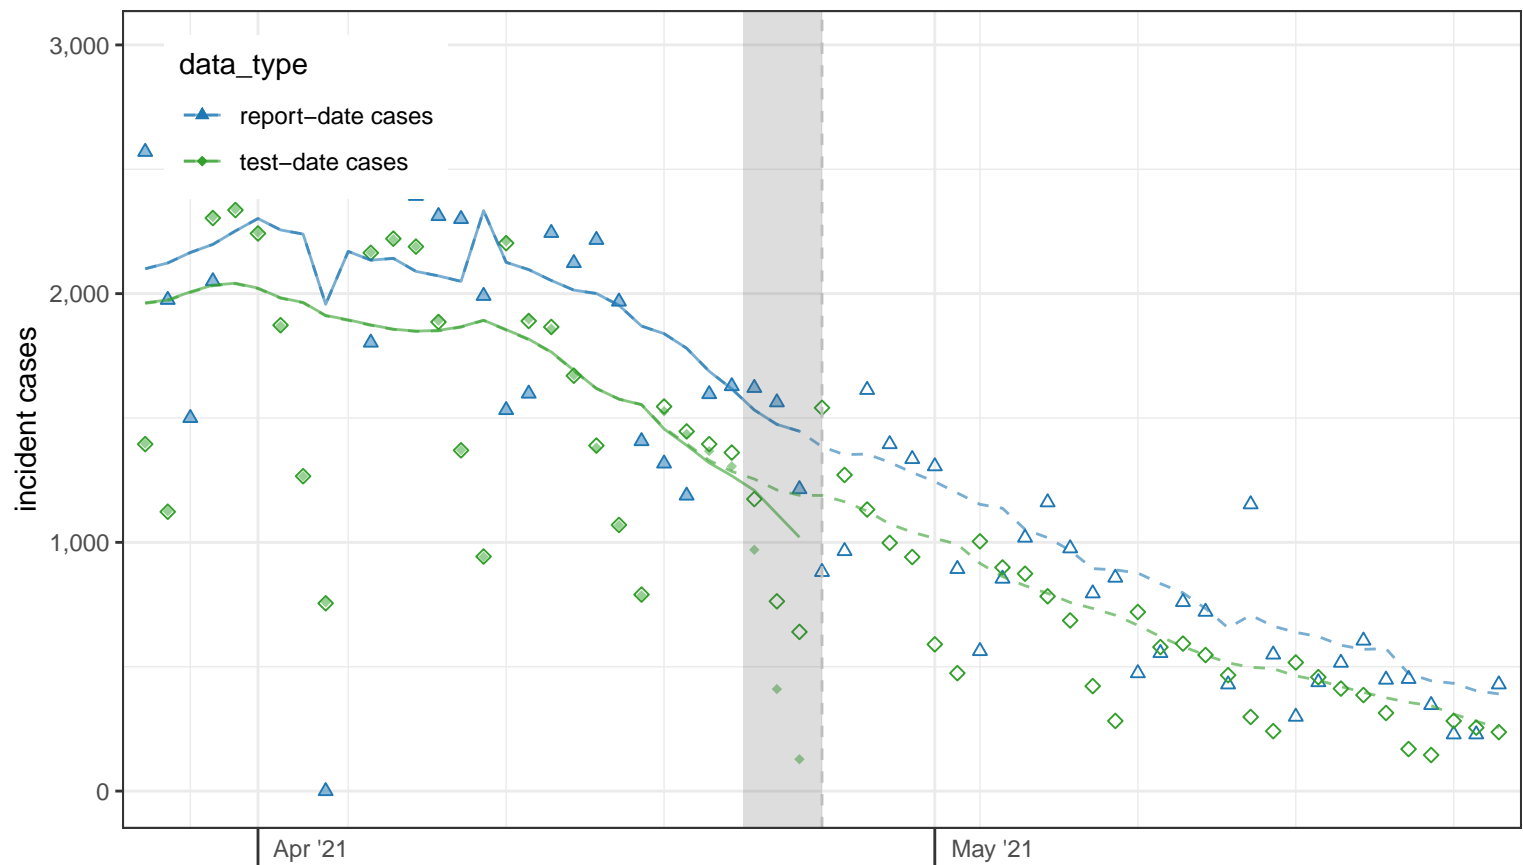

Massachusetts case data as of: 2021-05-03

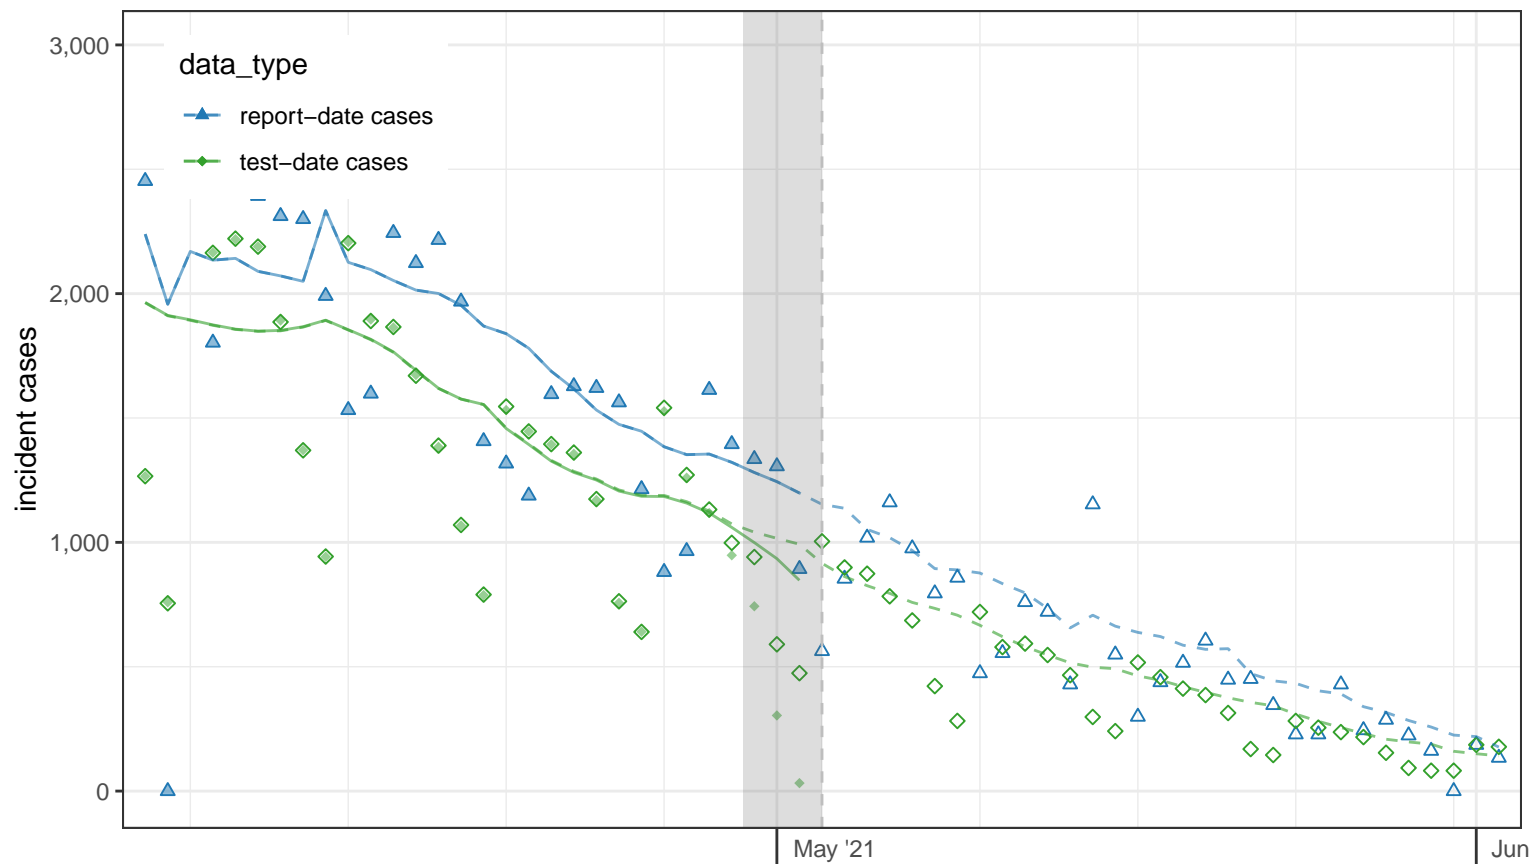



Massachusetts case data as of: 2021-05-10

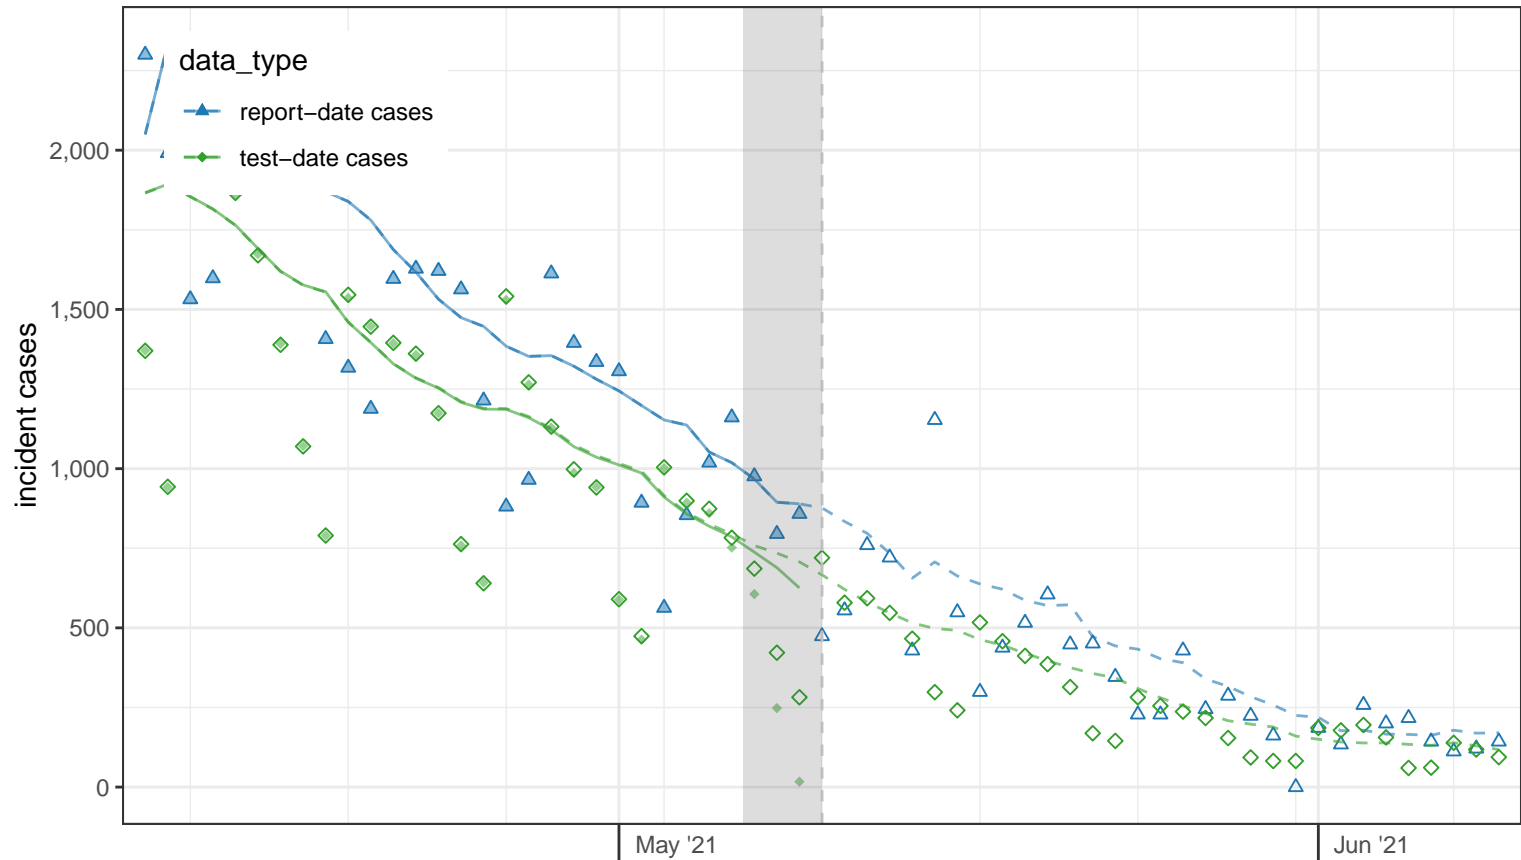

Massachusetts case data as of: 2021-05-17

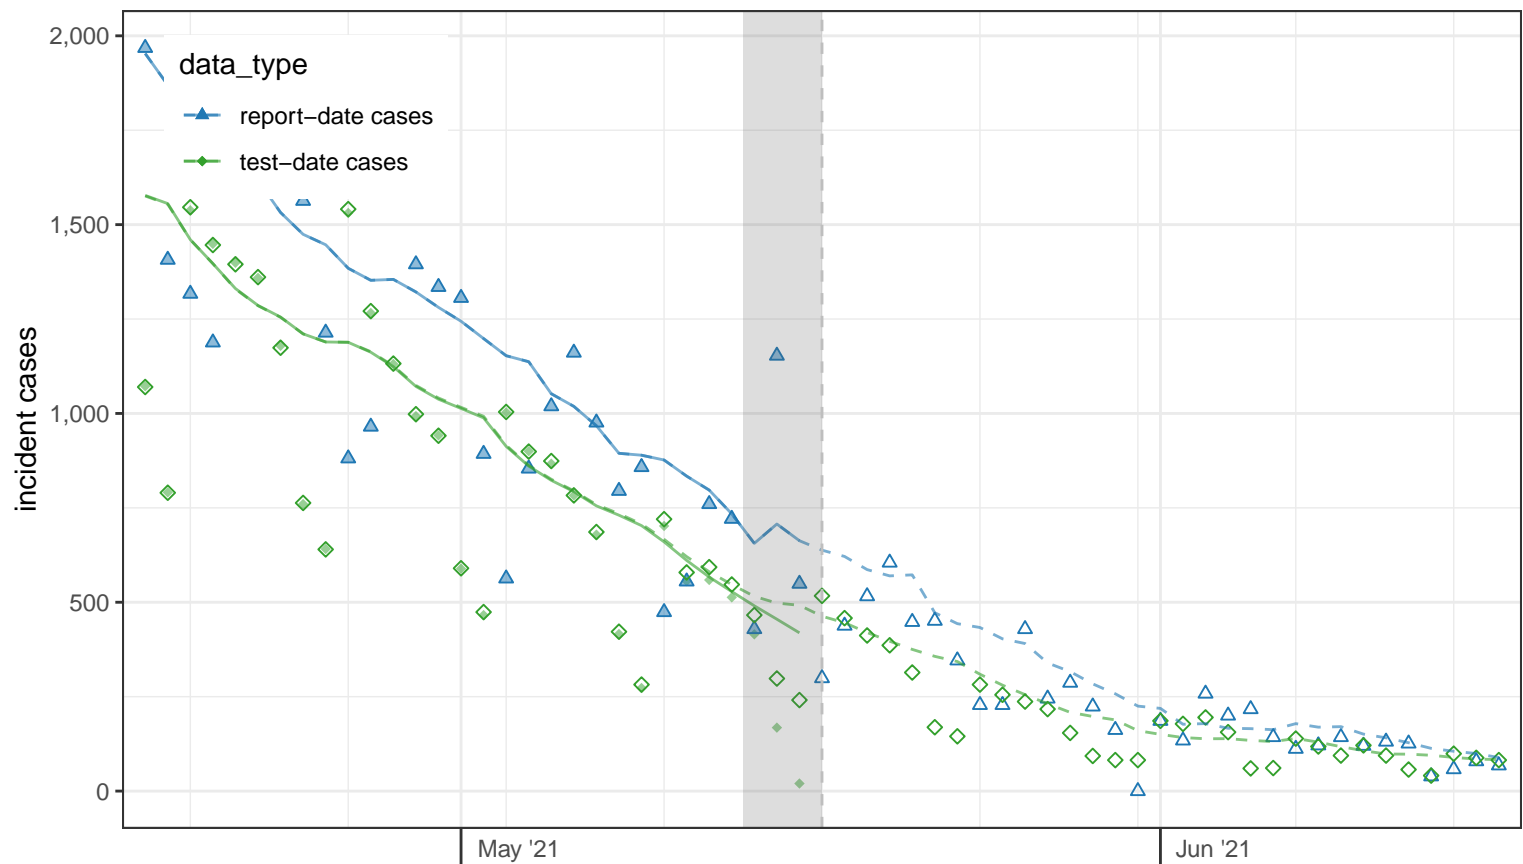

Massachusetts case data as of: 2021-05-24

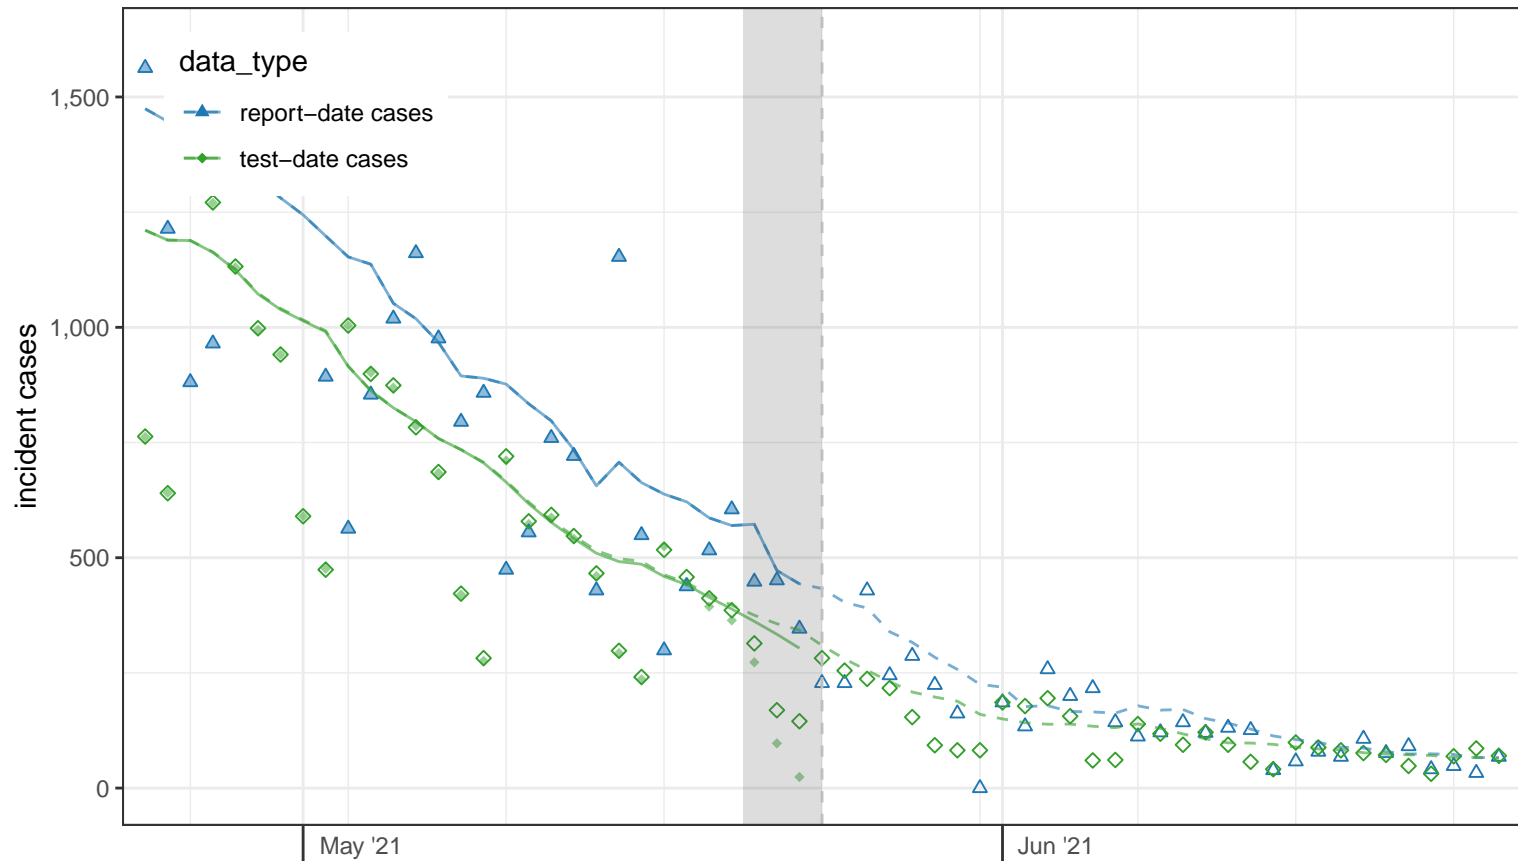

Massachusetts case data as of: 2021-06-07

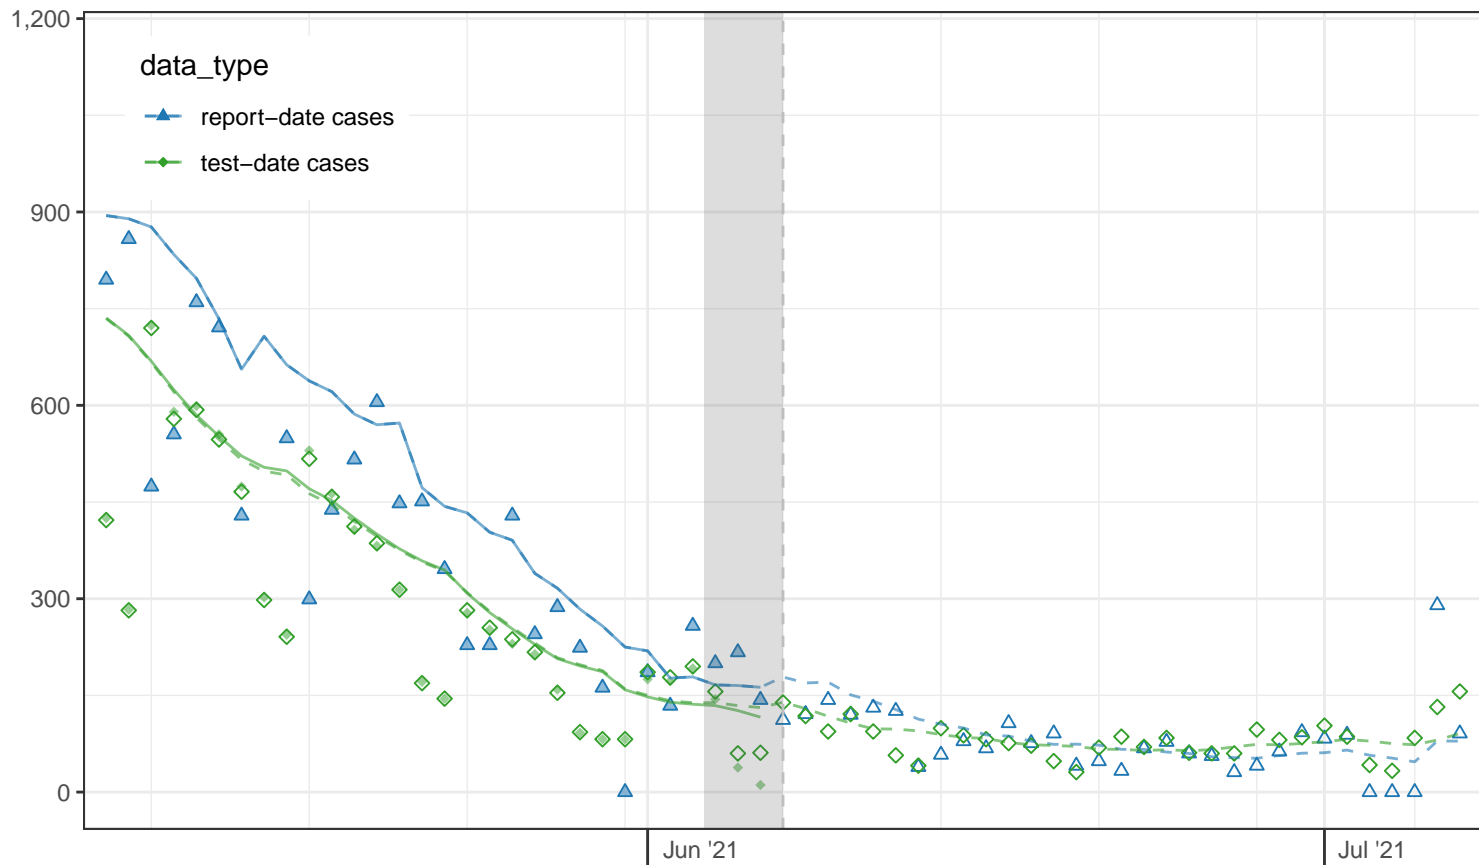

Massachusetts case data as of: 2021-06-14

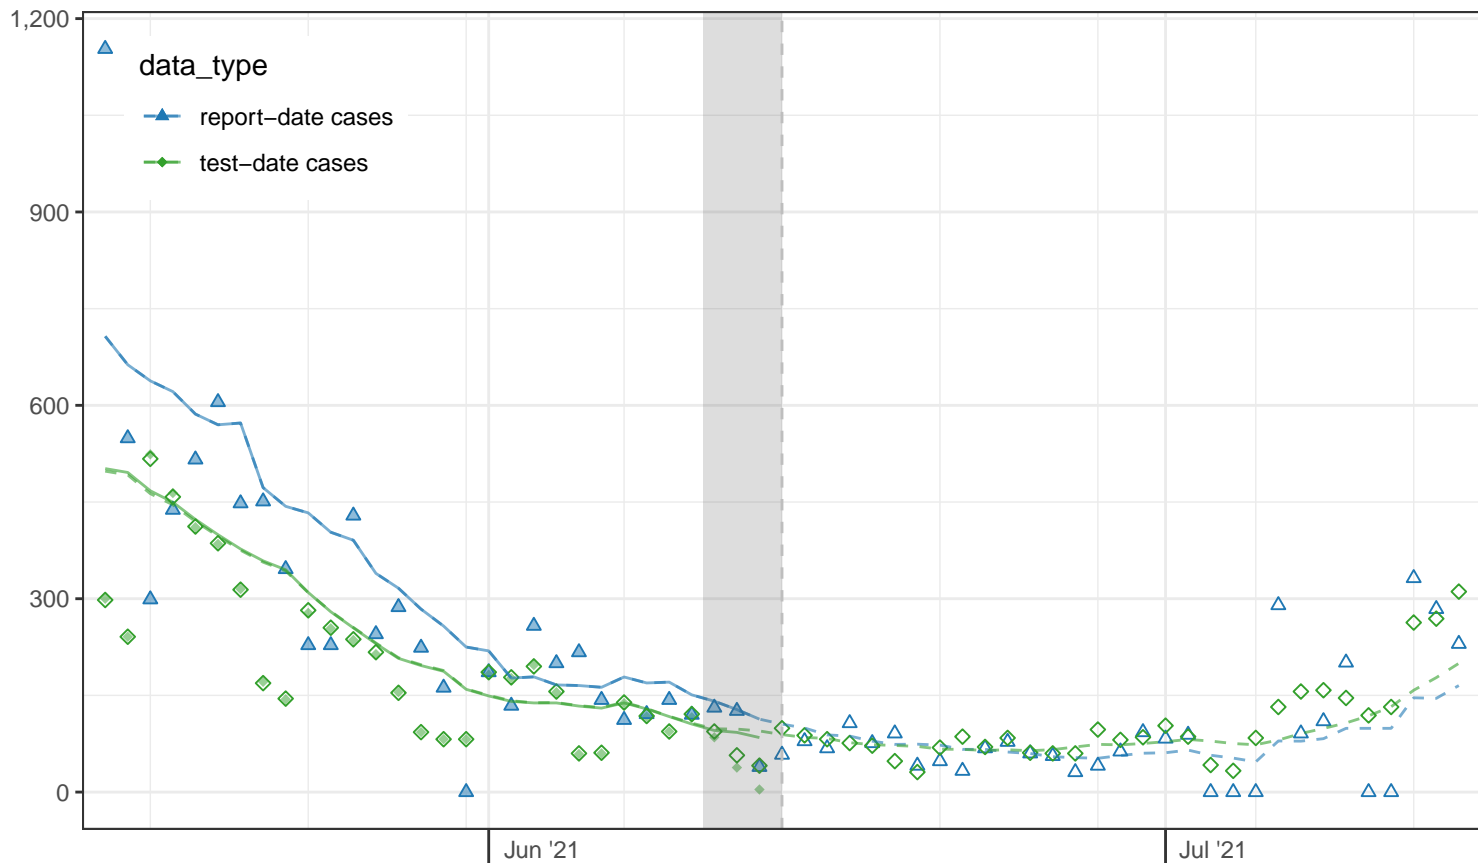

Massachusetts case data as of: 2021-06-21

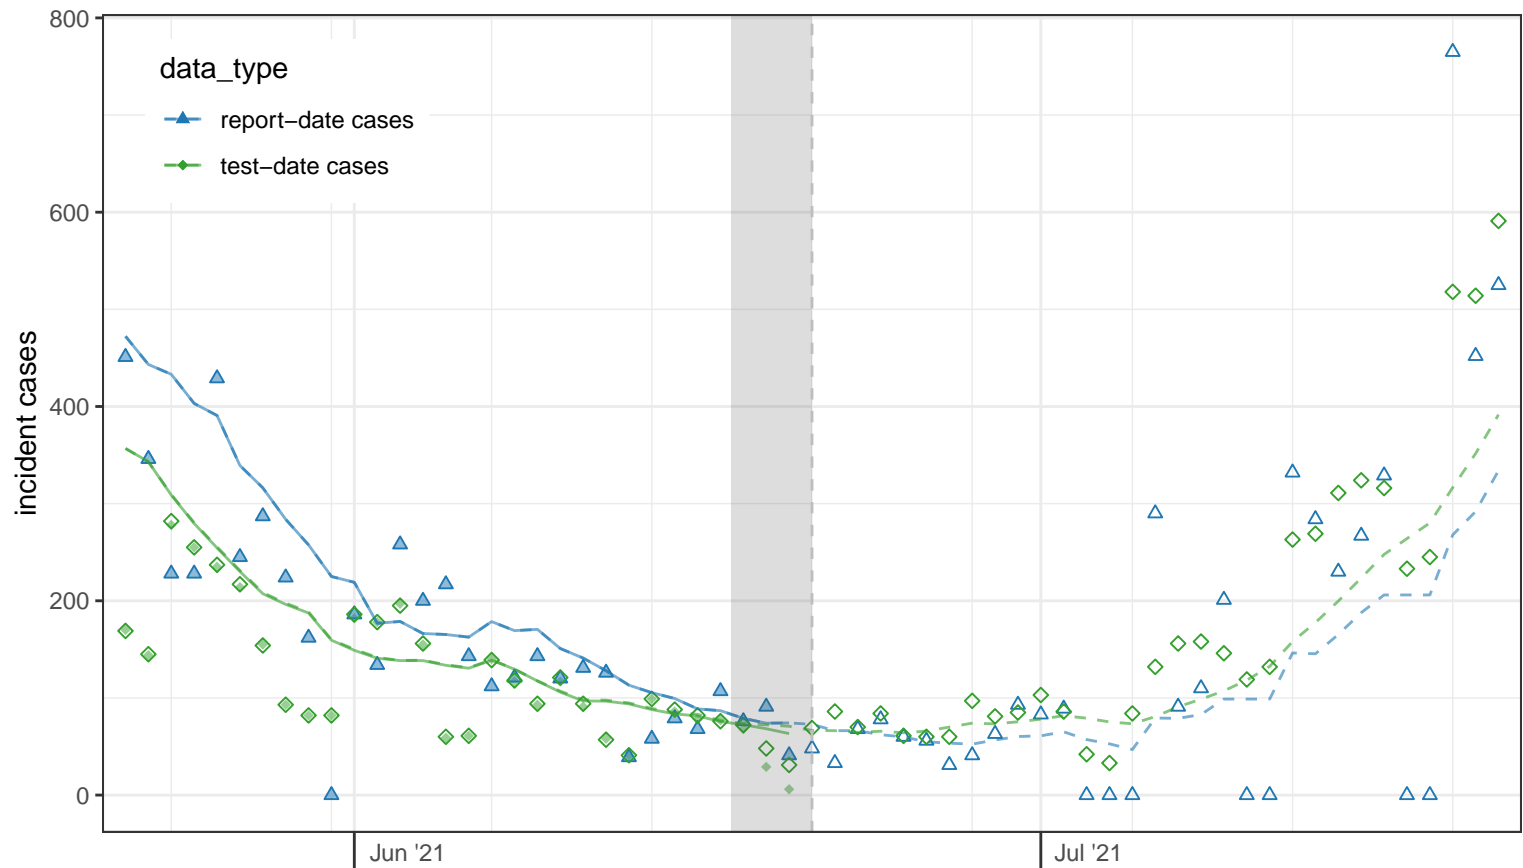

Massachusetts case data as of: 2021-06-28

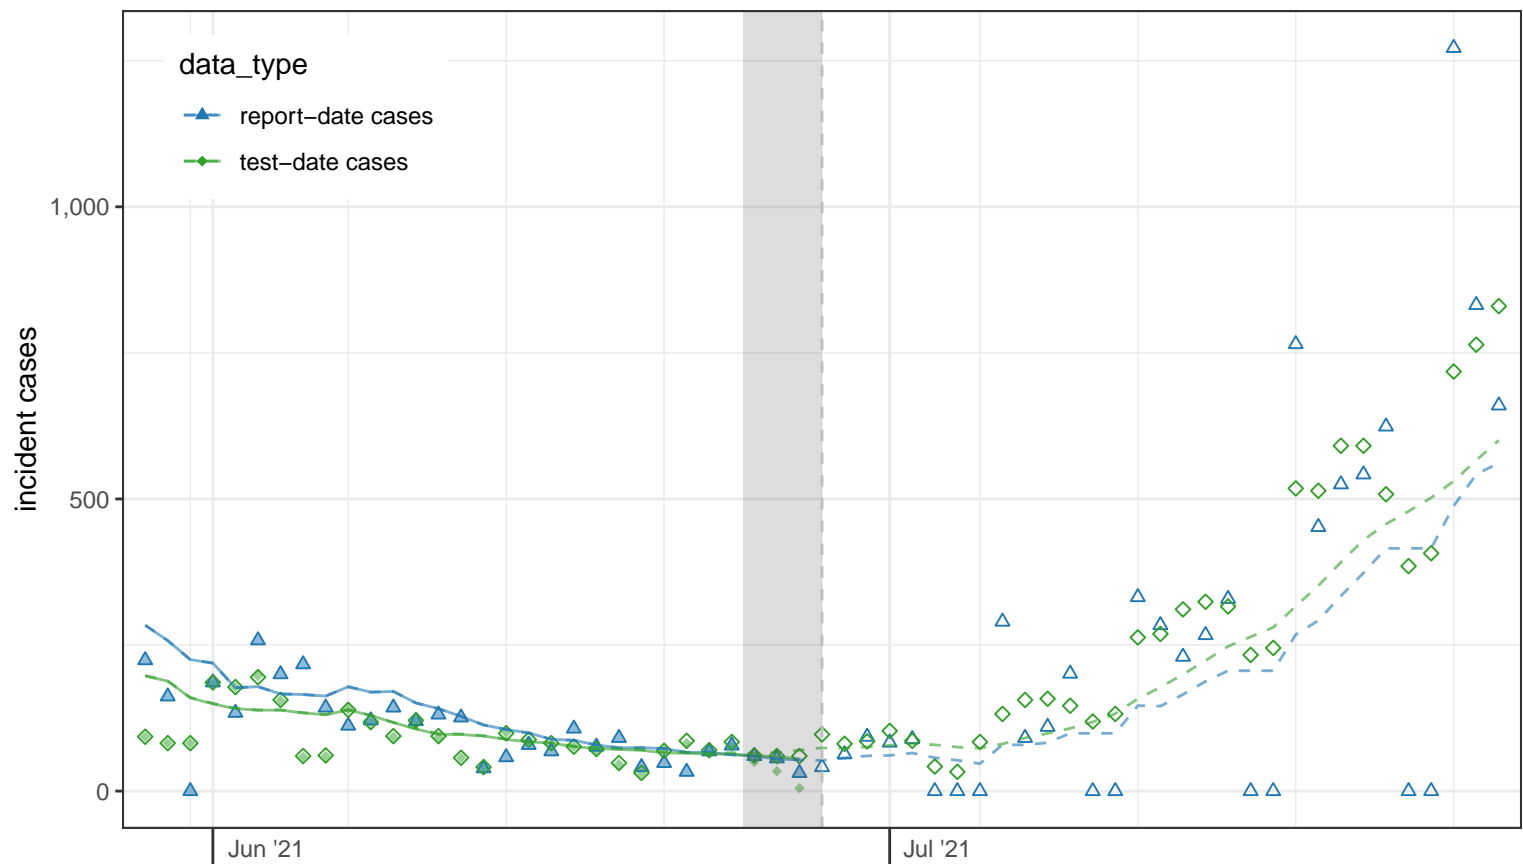

# Massachusetts case data as of: 2021-07-12

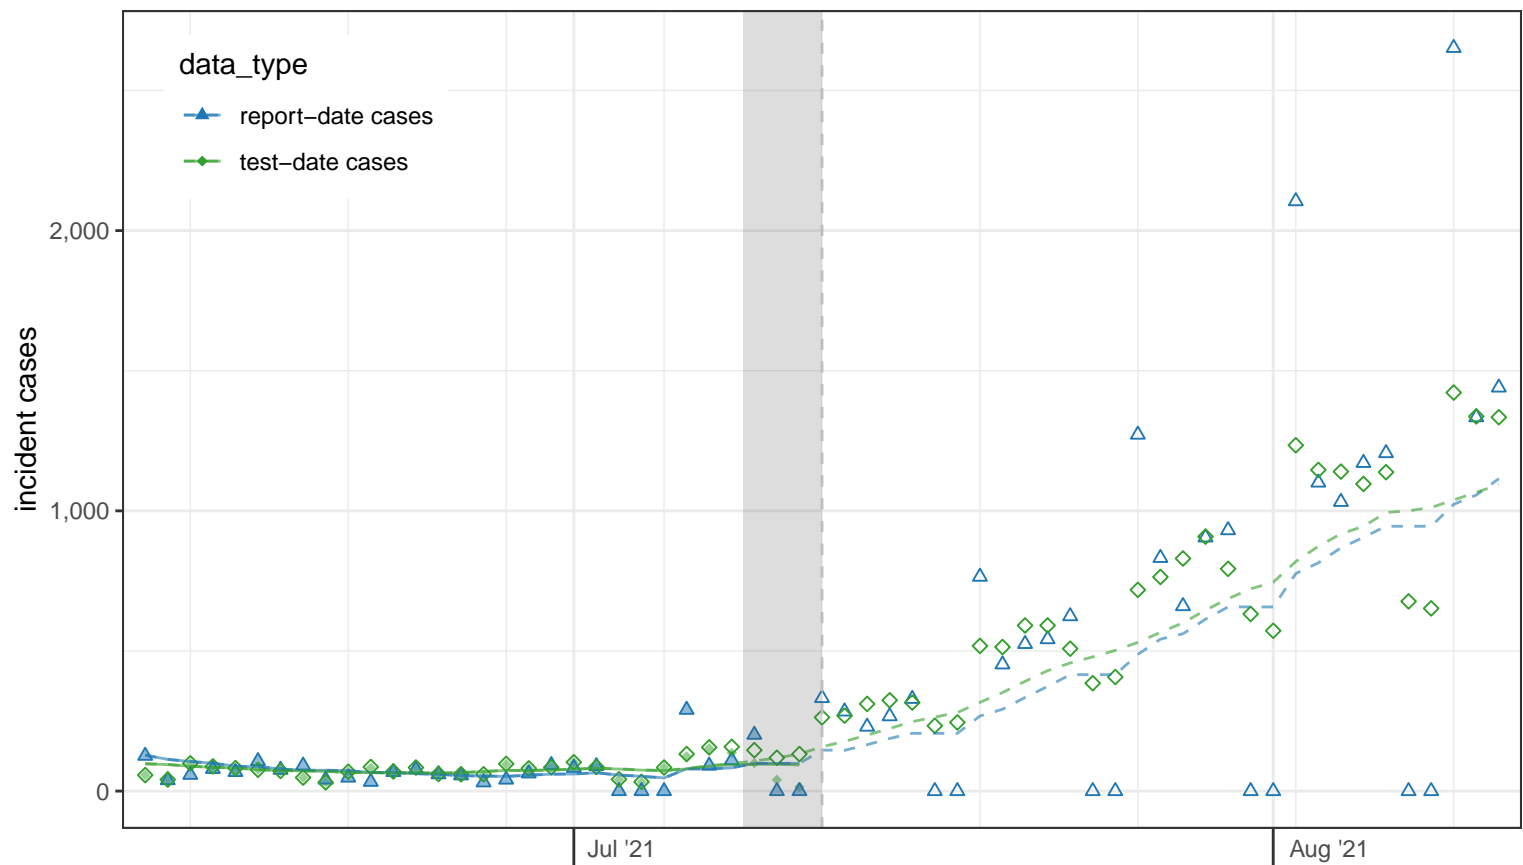



Massachusetts case data as of: 2021-07-19

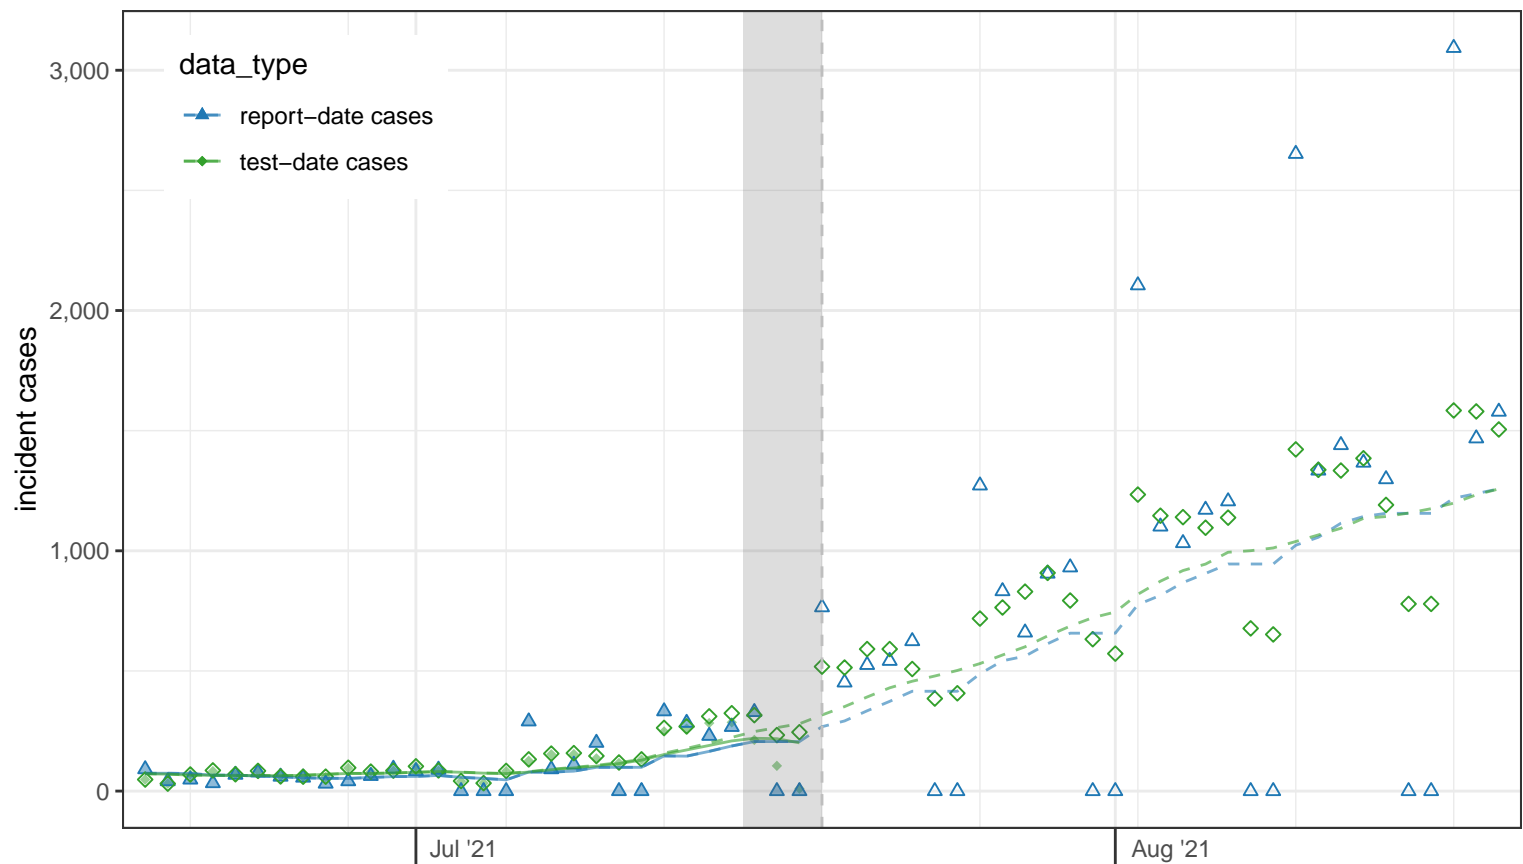

# Massachusetts case data as of: 2021-07-26

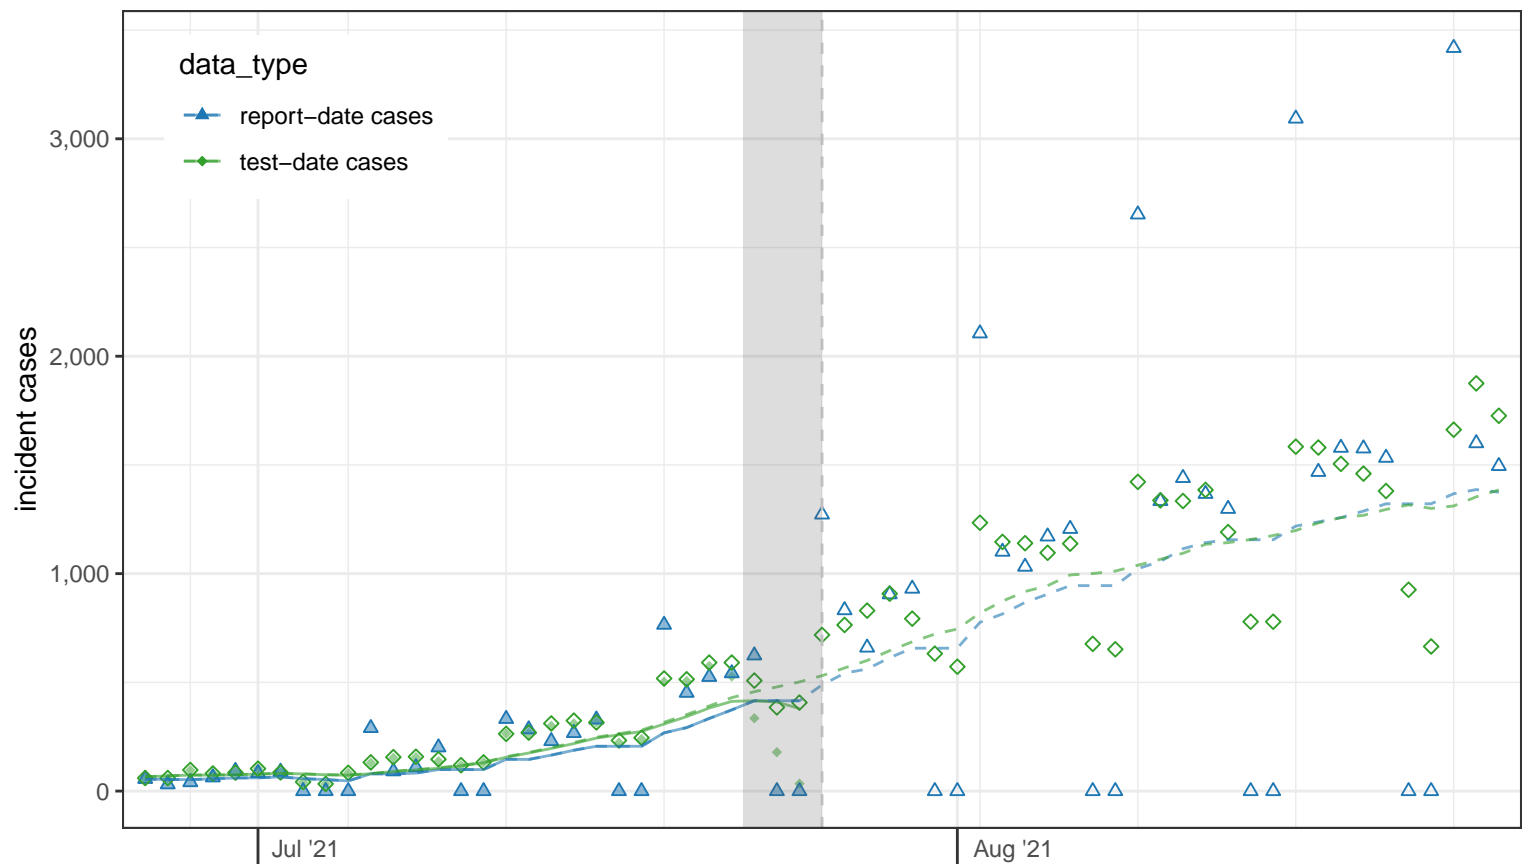

# Massachusetts case data as of: 2021-08-02

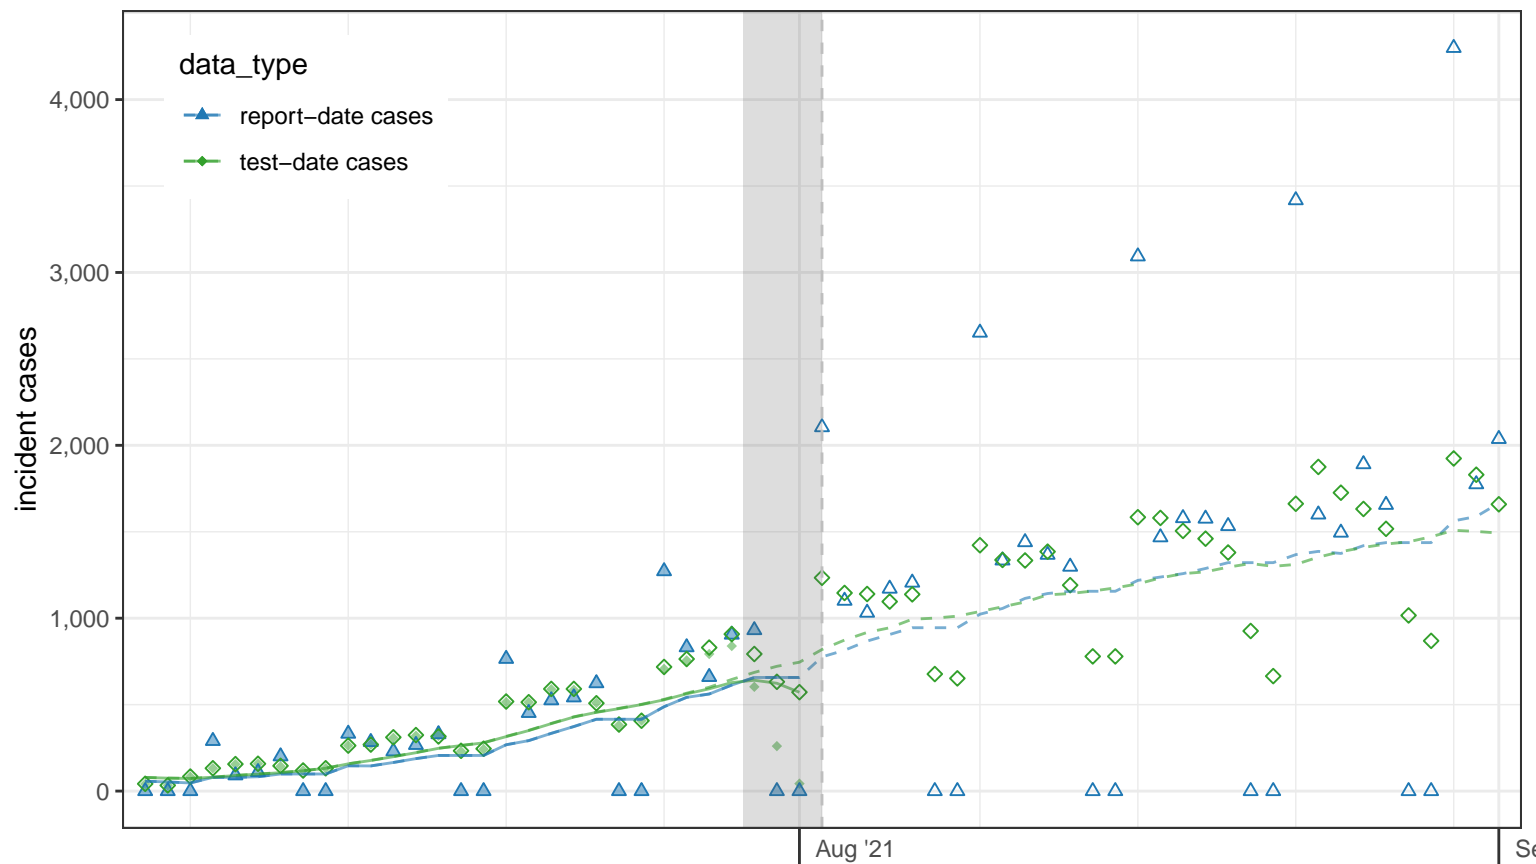

# Massachusetts case data as of: 2021-08-09

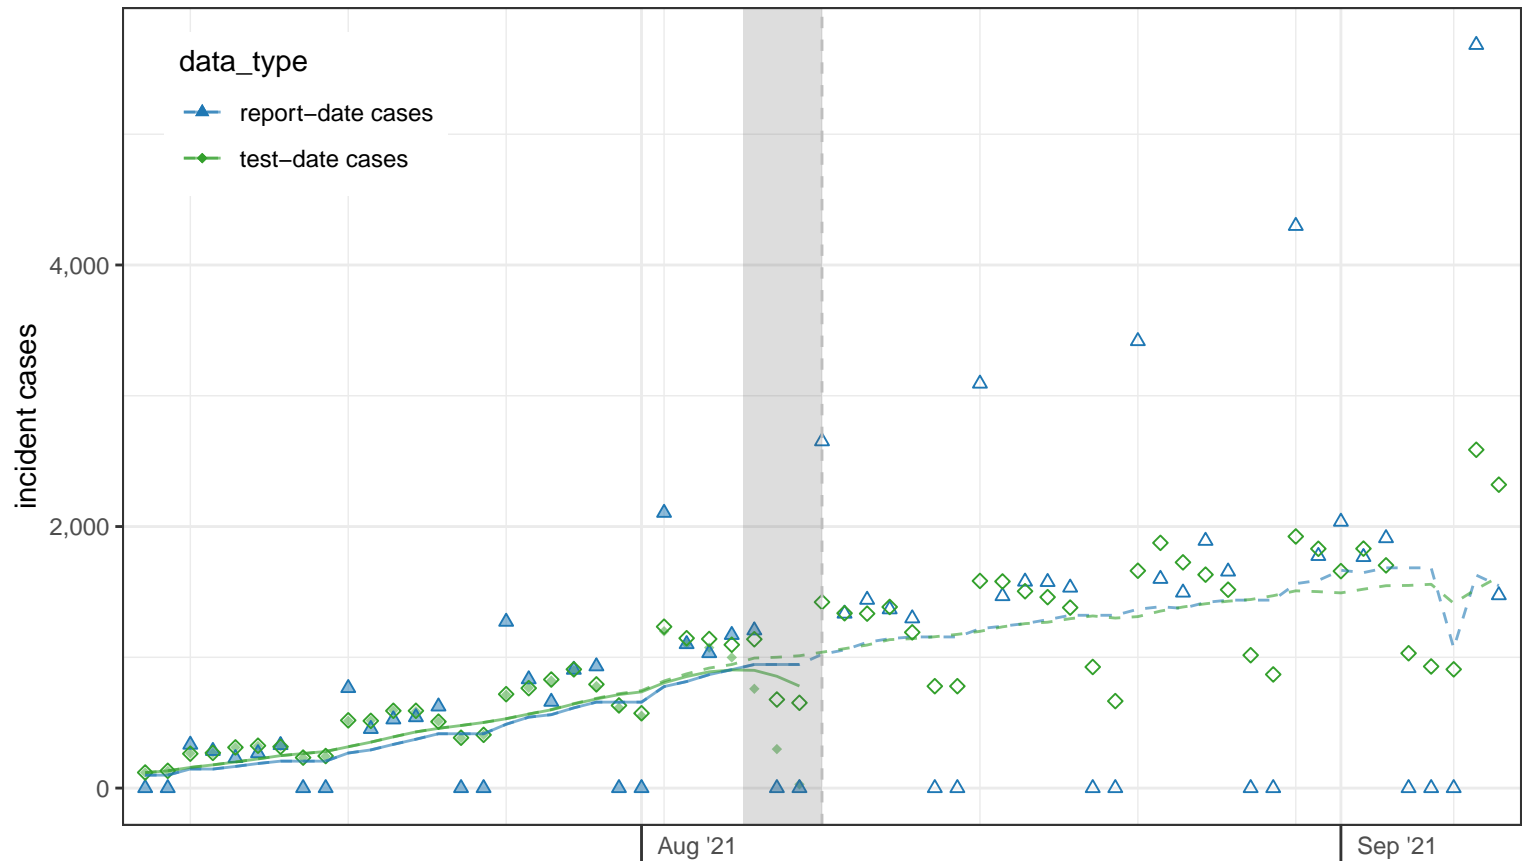

# Massachusetts case data as of: 2021-08-16

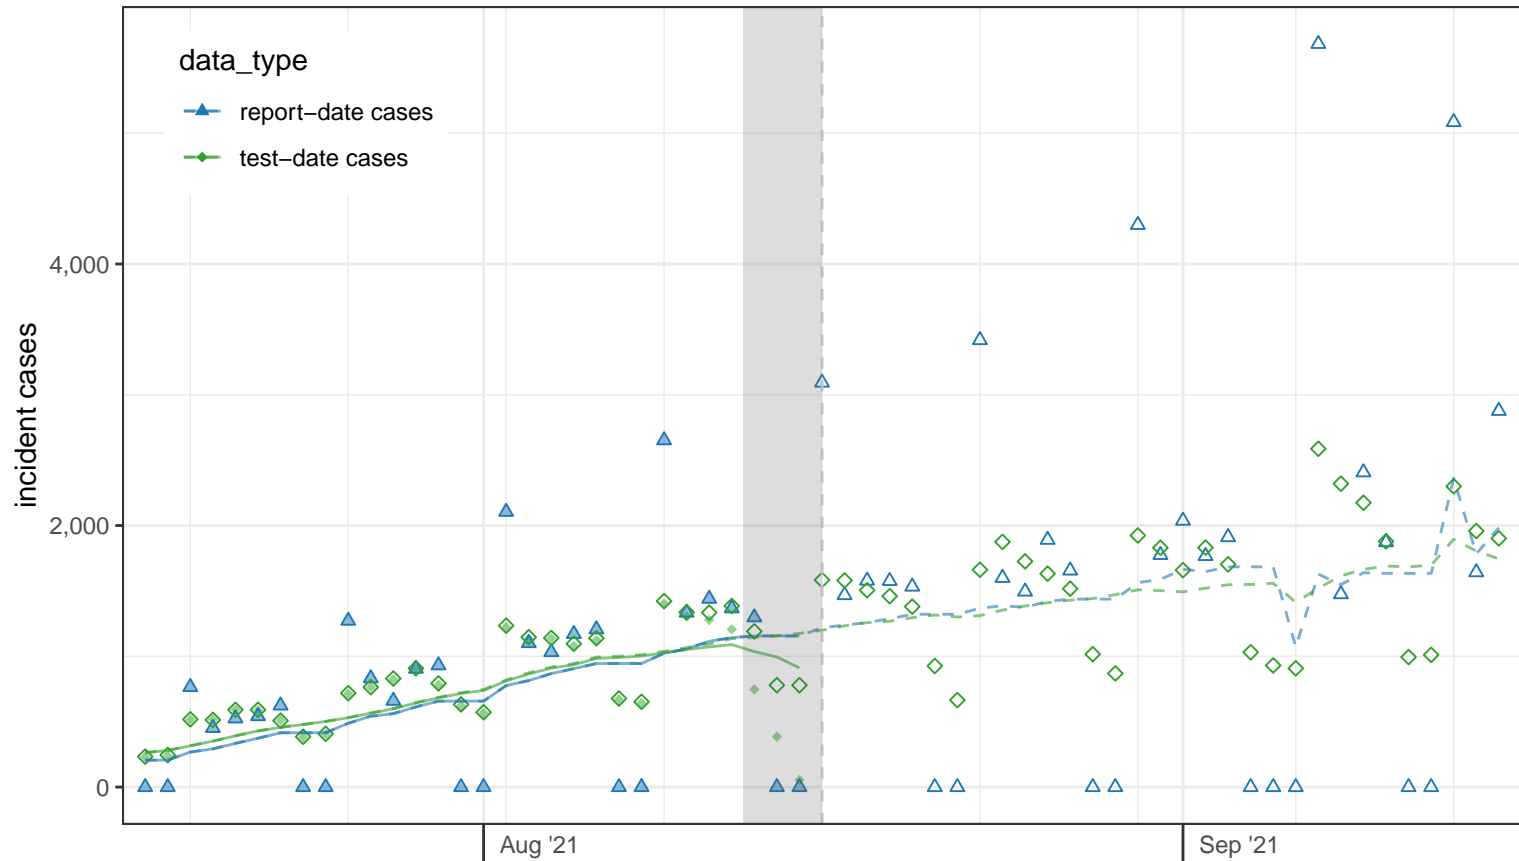

# Massachusetts case data as of: 2021-08-23

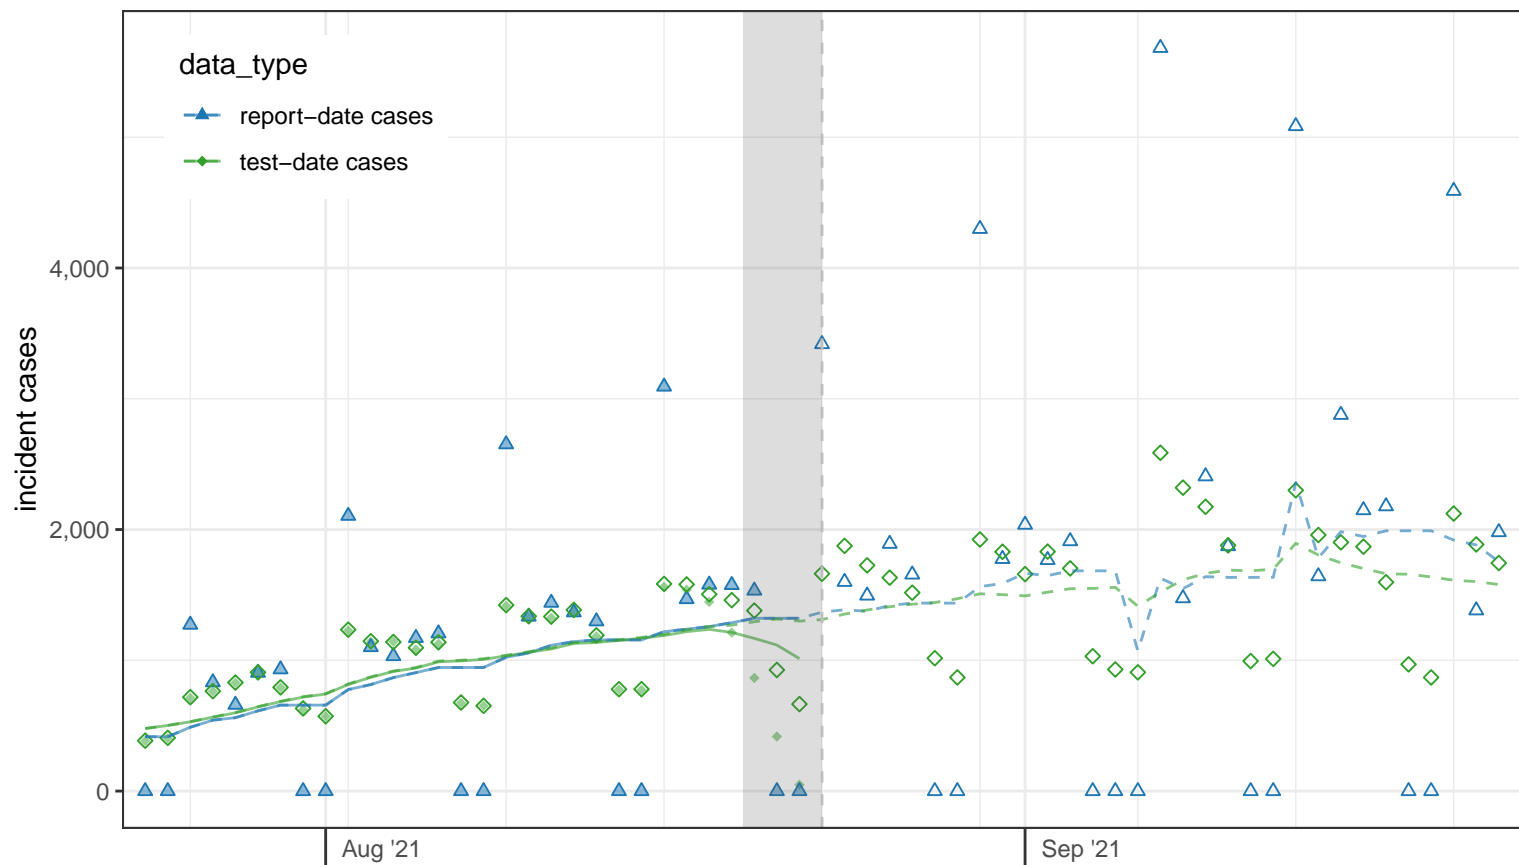

# Massachusetts case data as of: 2021-08-30

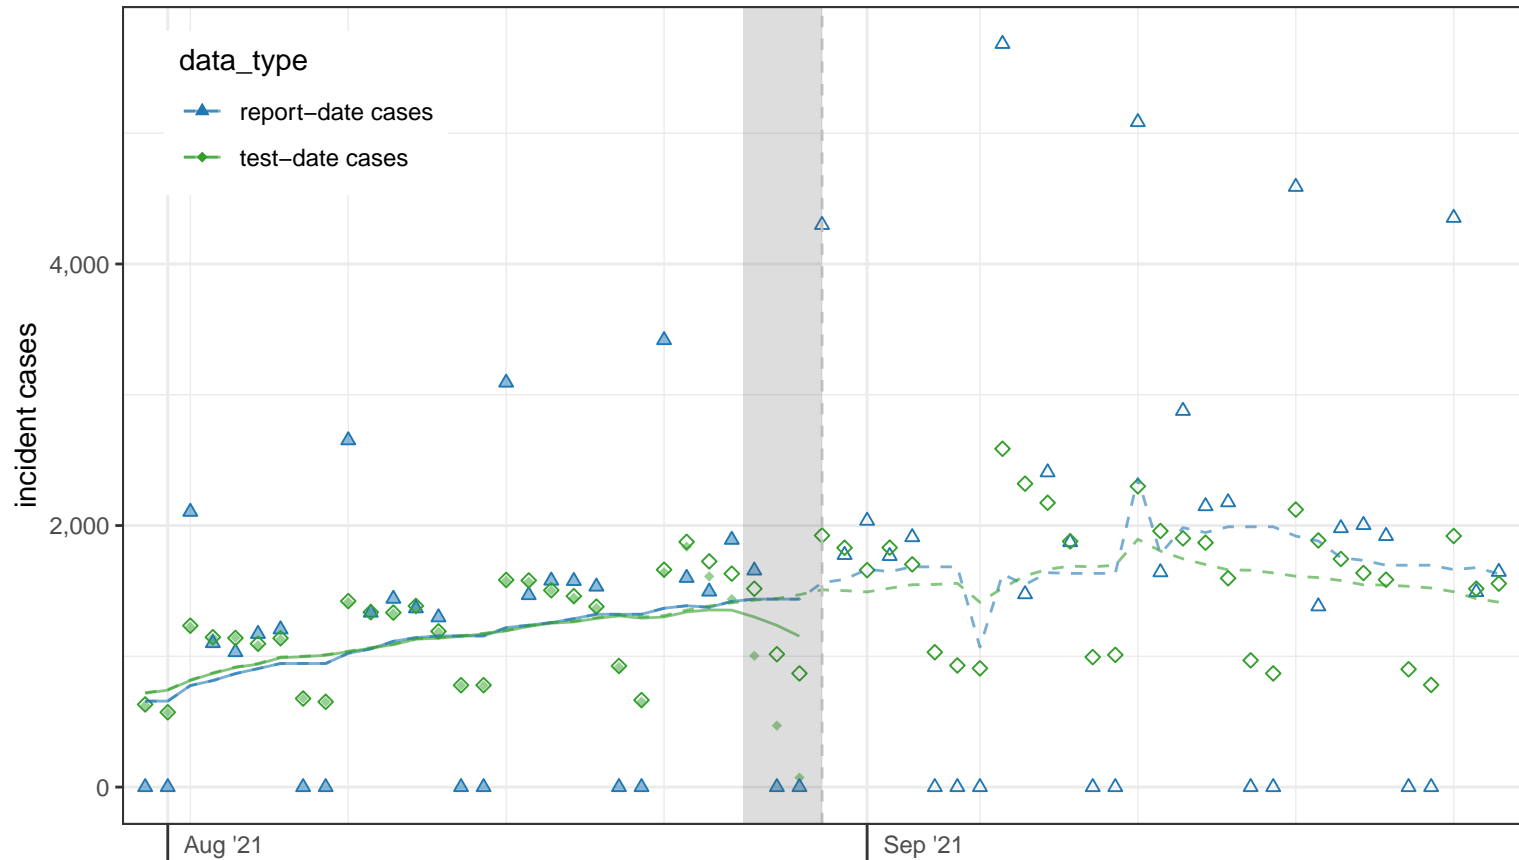

# Massachusetts case data as of: 2021-09-13

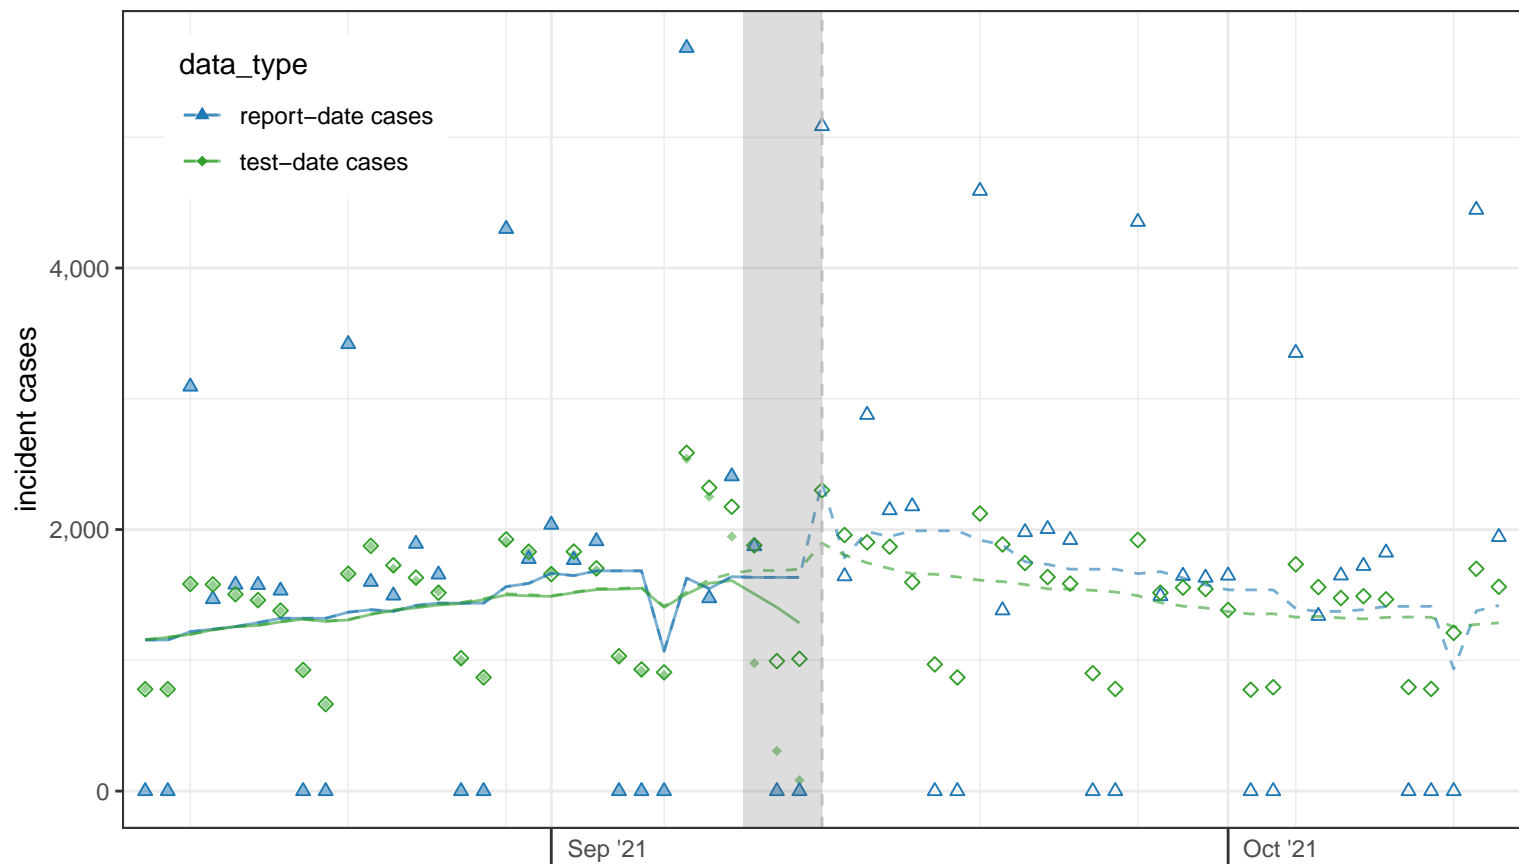



# Massachusetts case data as of: 2021-09-20

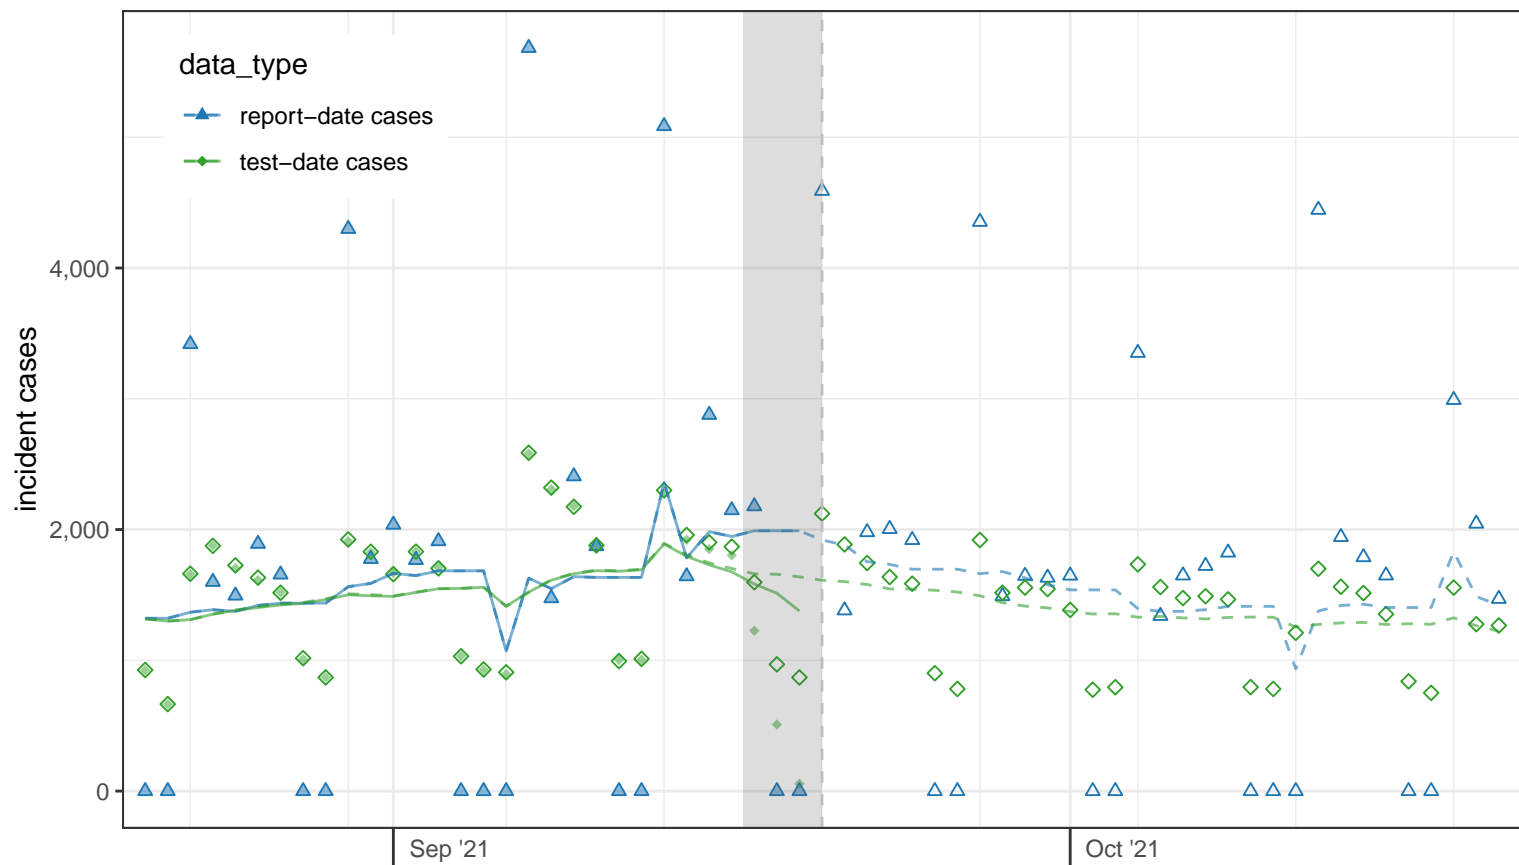

# Massachusetts case data as of: 2021-09-27

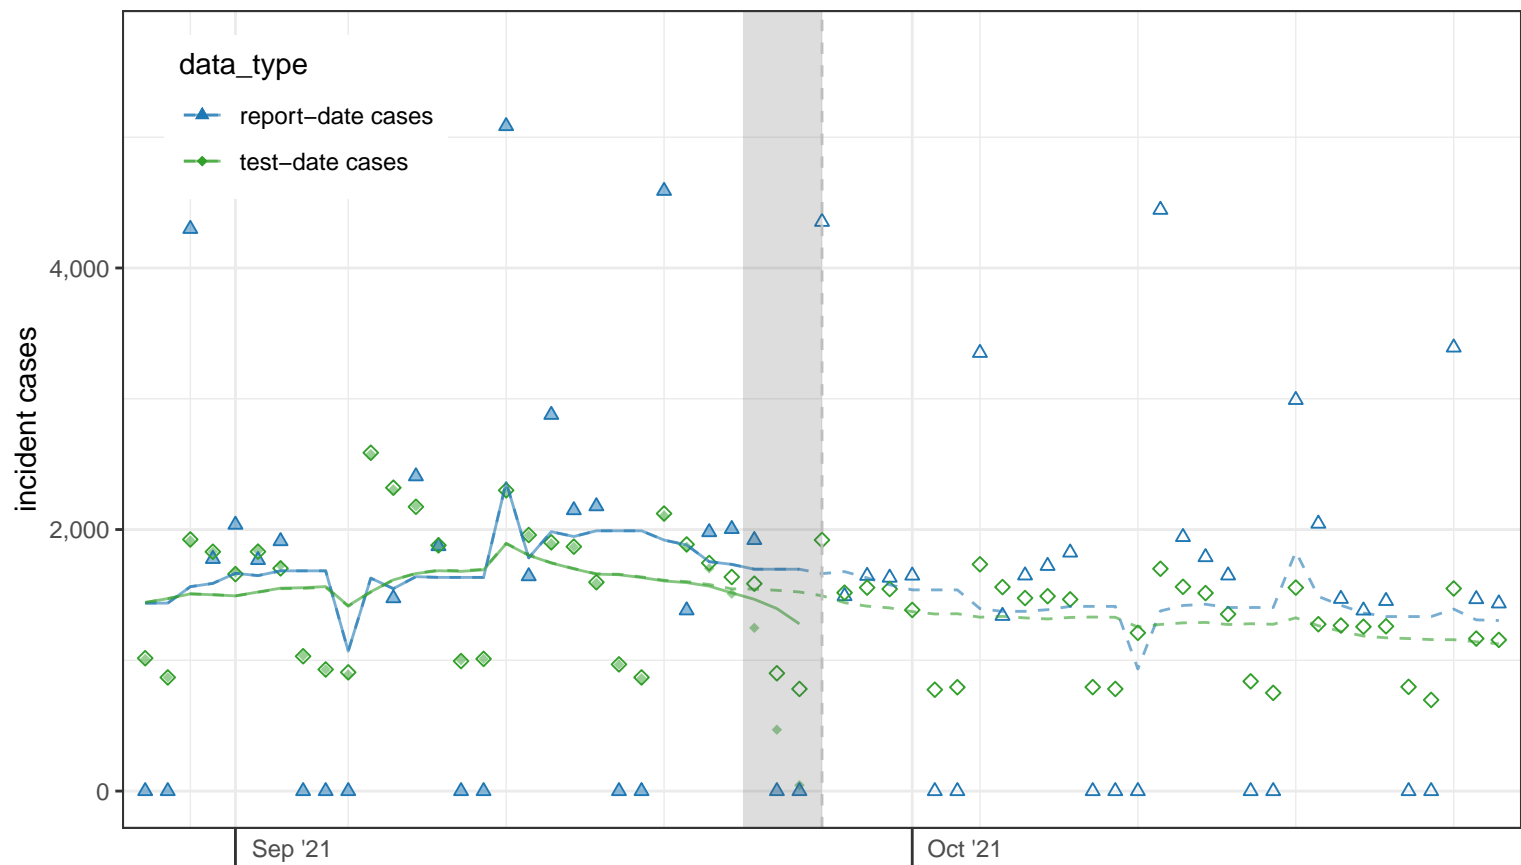

# Massachusetts case data as of: 2021-10-04

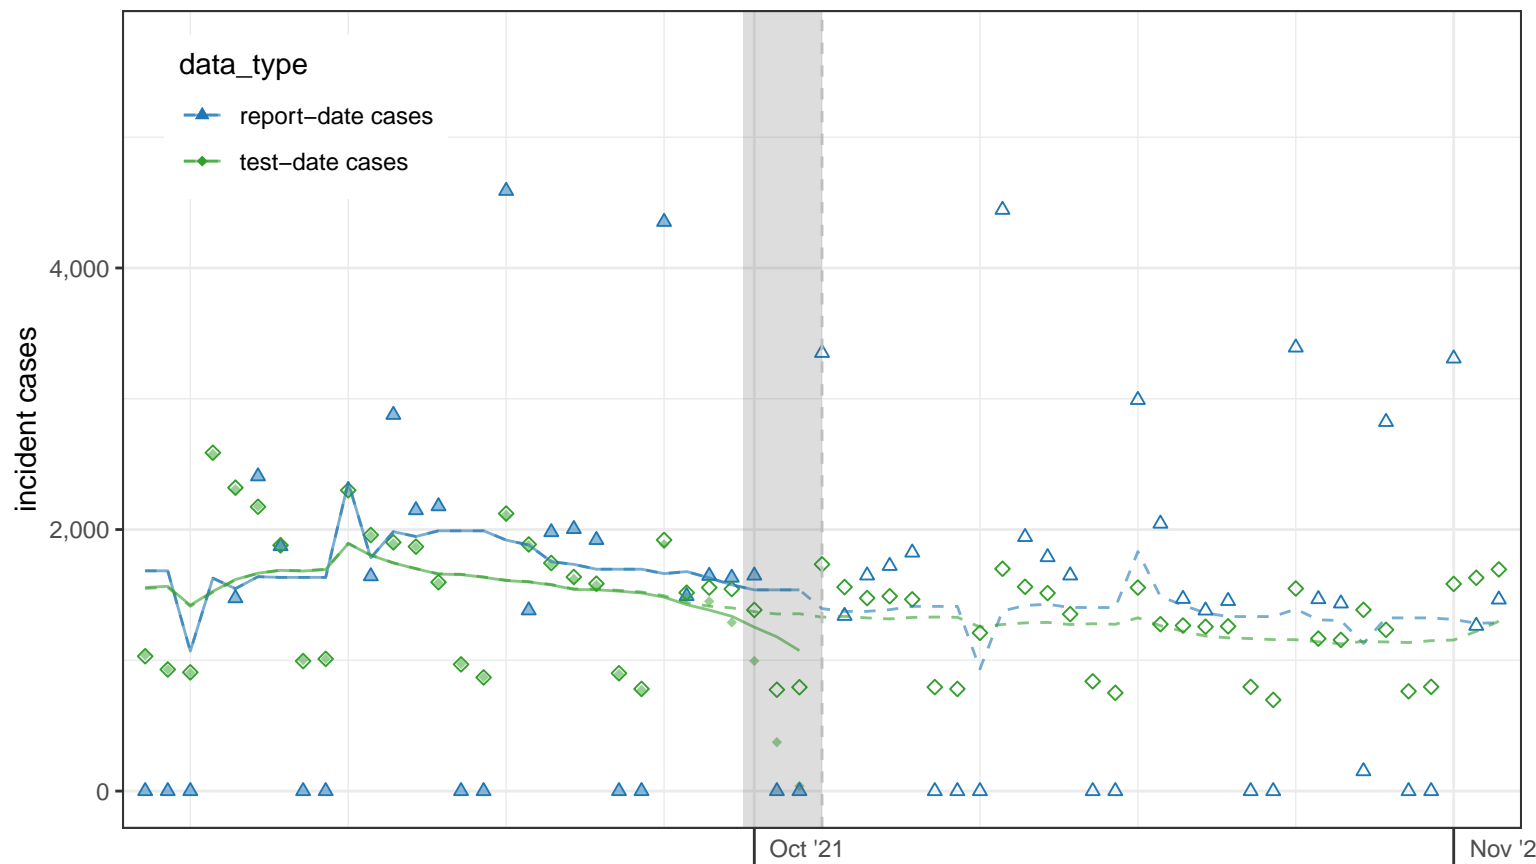

Massachusetts case data as of: 2021-10-18

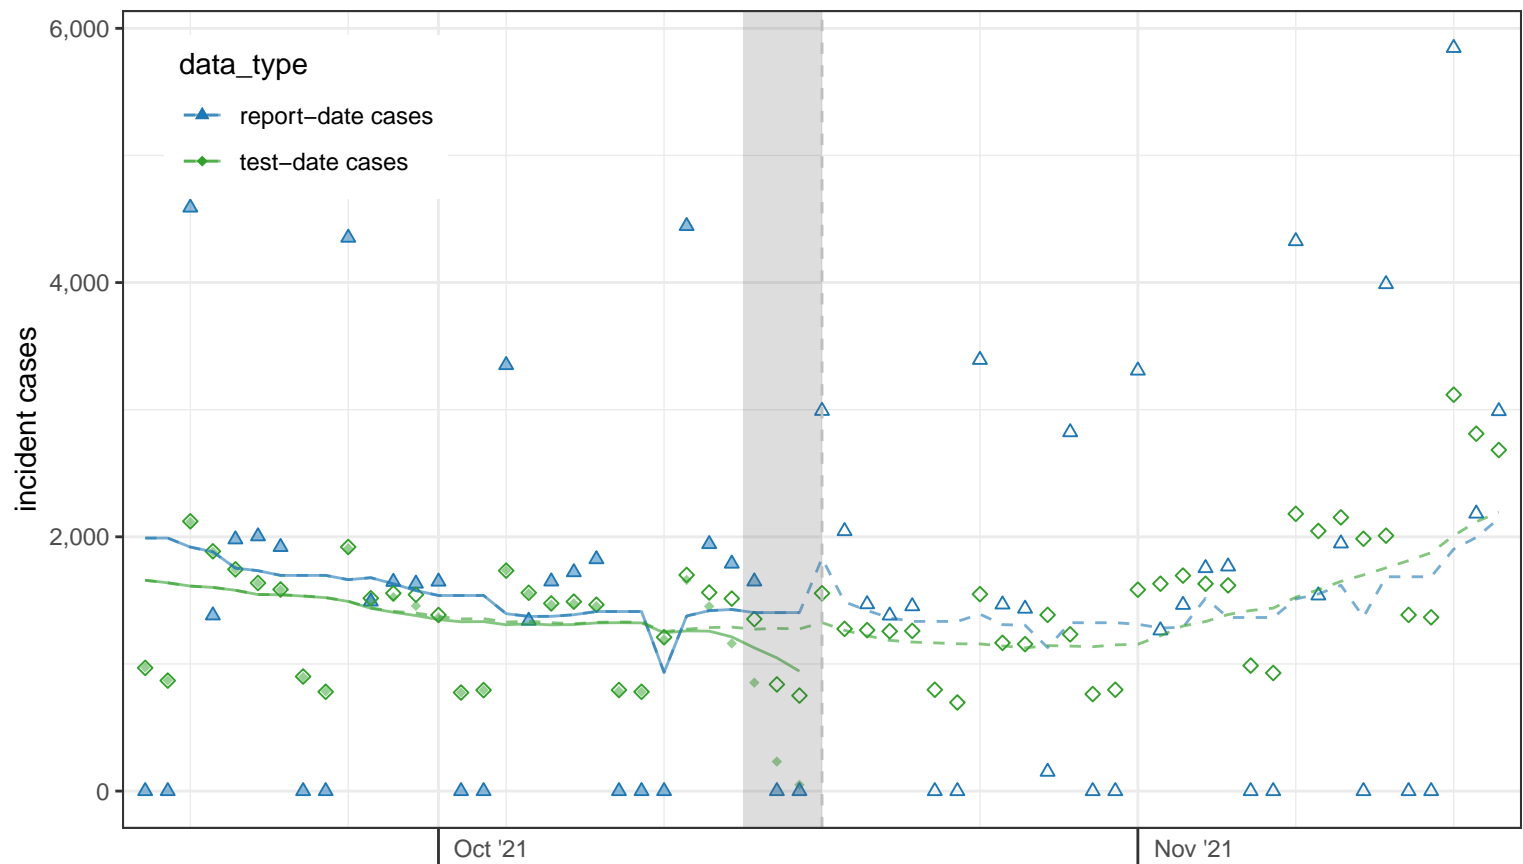

# Massachusetts case data as of: 2021-10-25

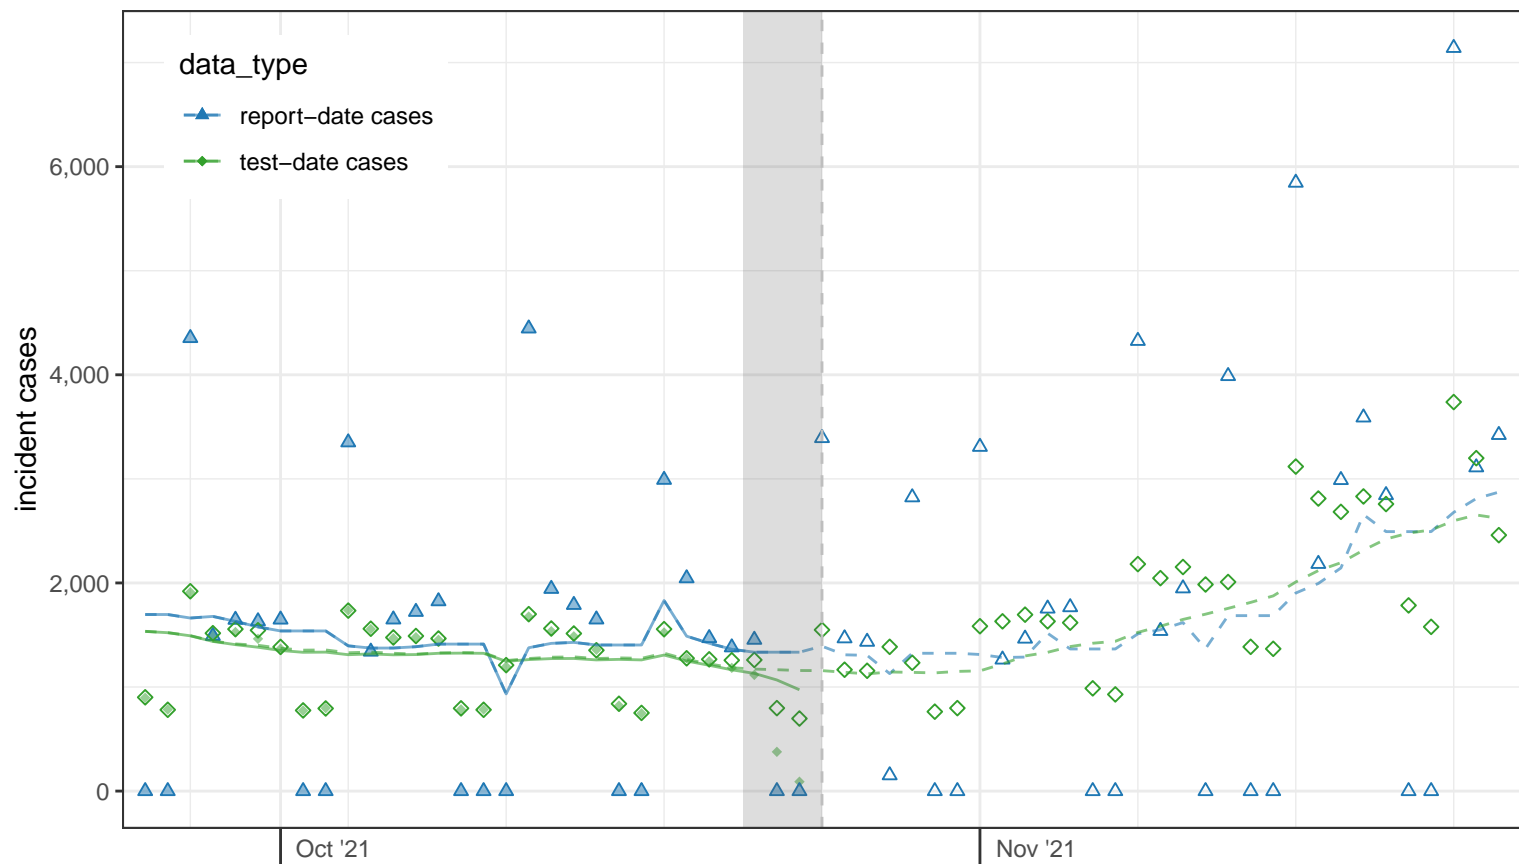

# Massachusetts case data as of: 2021-11-01

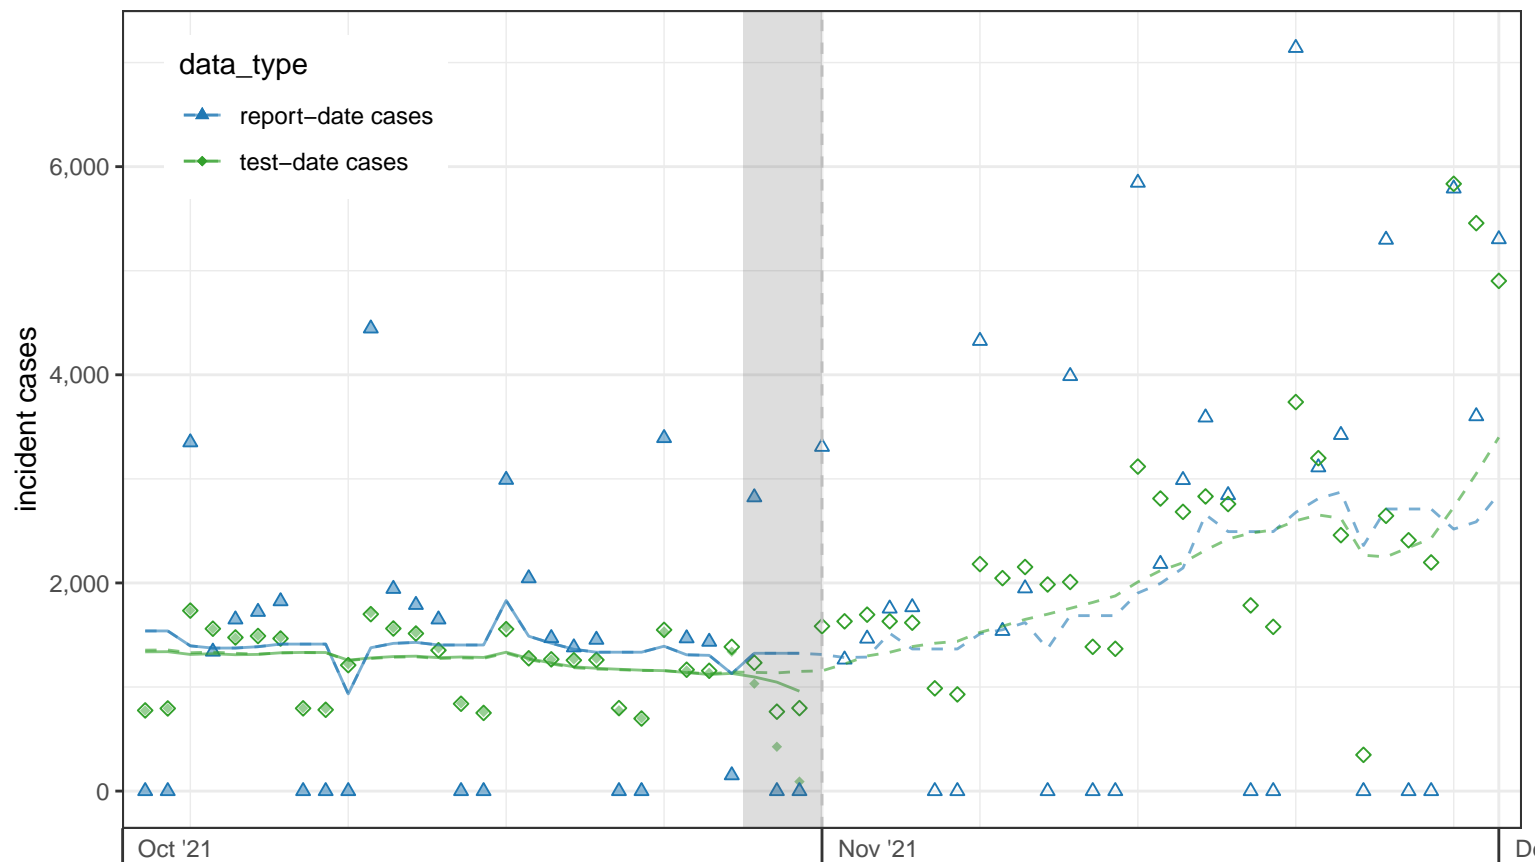

# Massachusetts case data as of: 2021-11-08

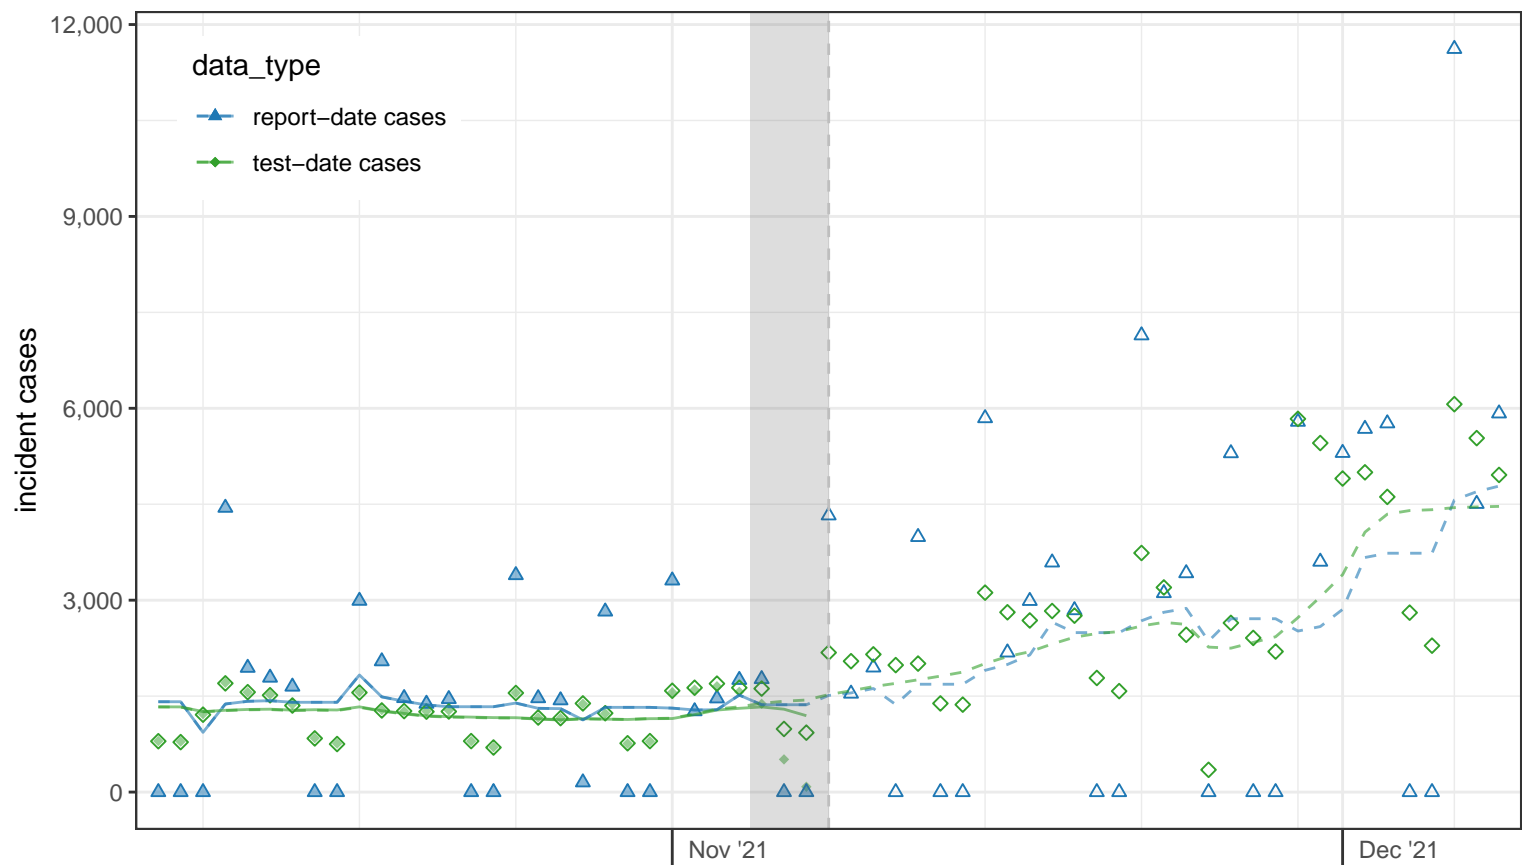

Massachusetts case data as of: 2021-11-15

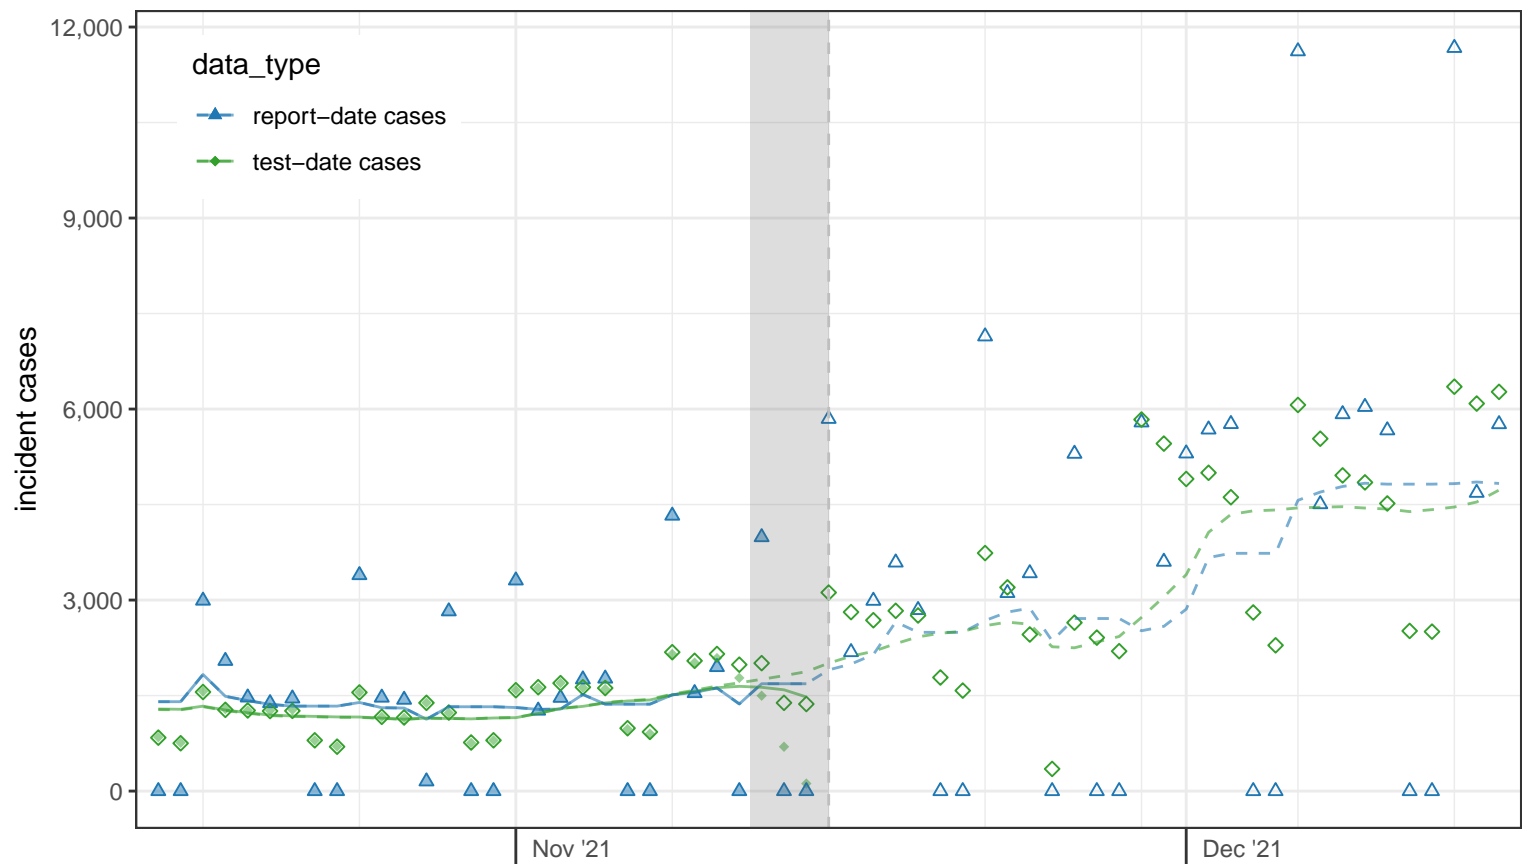



# Massachusetts case data as of: 2021-11-22

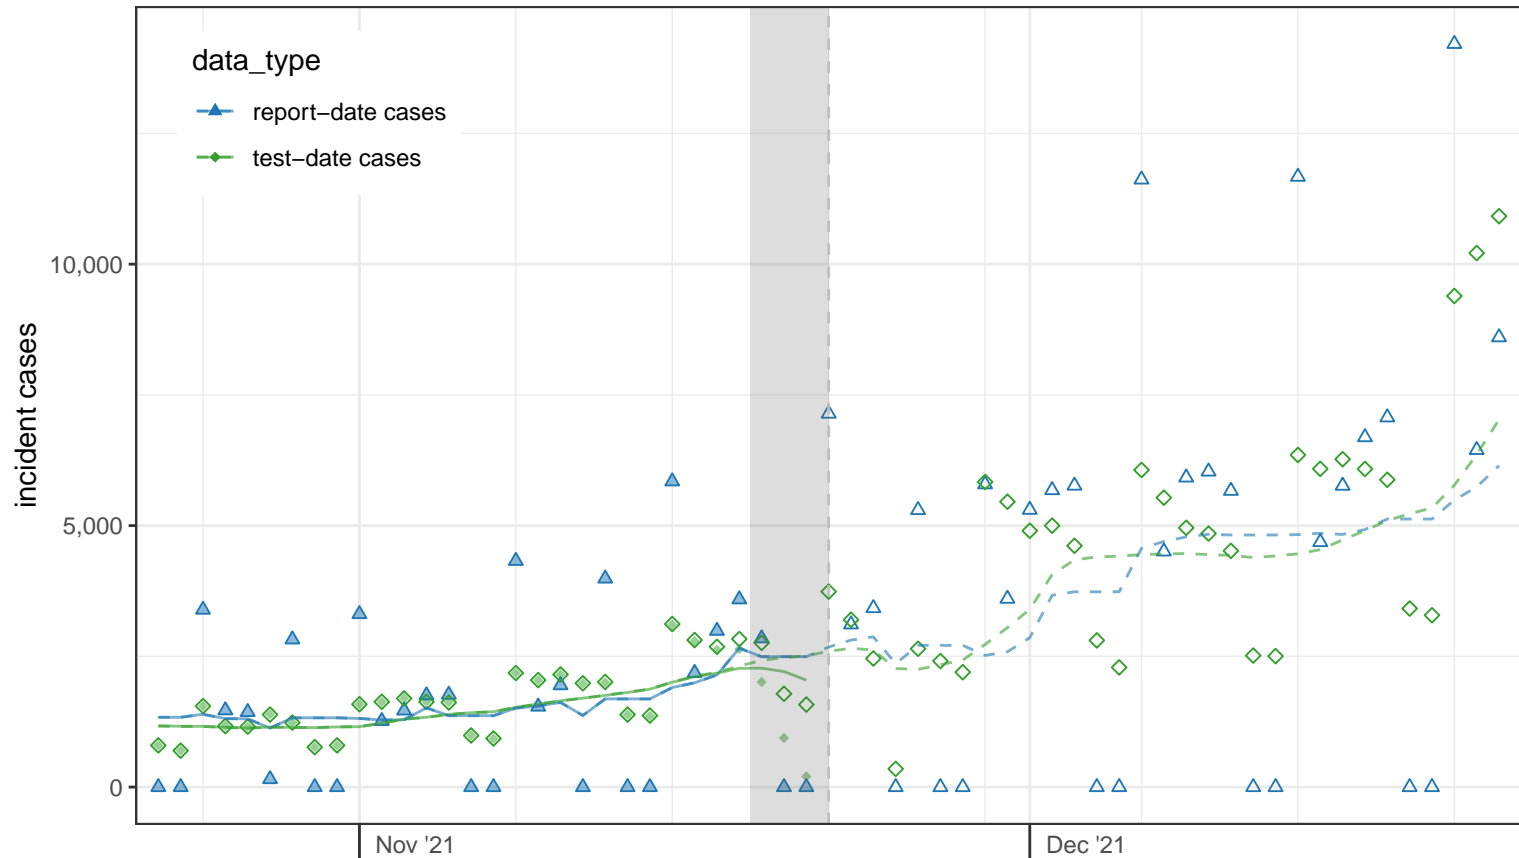

Massachusetts case data as of: 2021-11-29

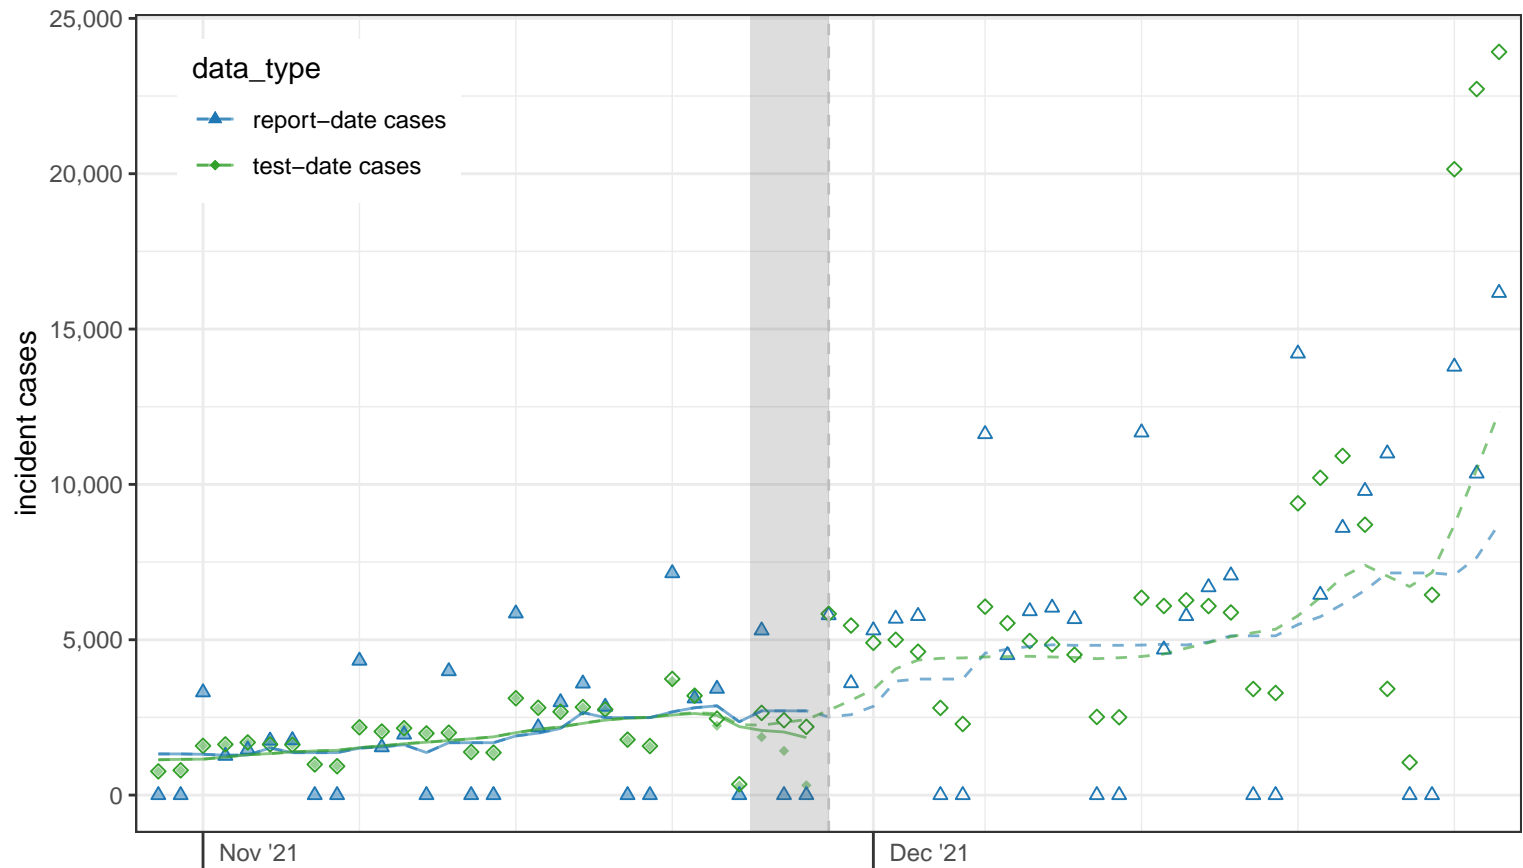

# Massachusetts case data as of: 2021-12-06

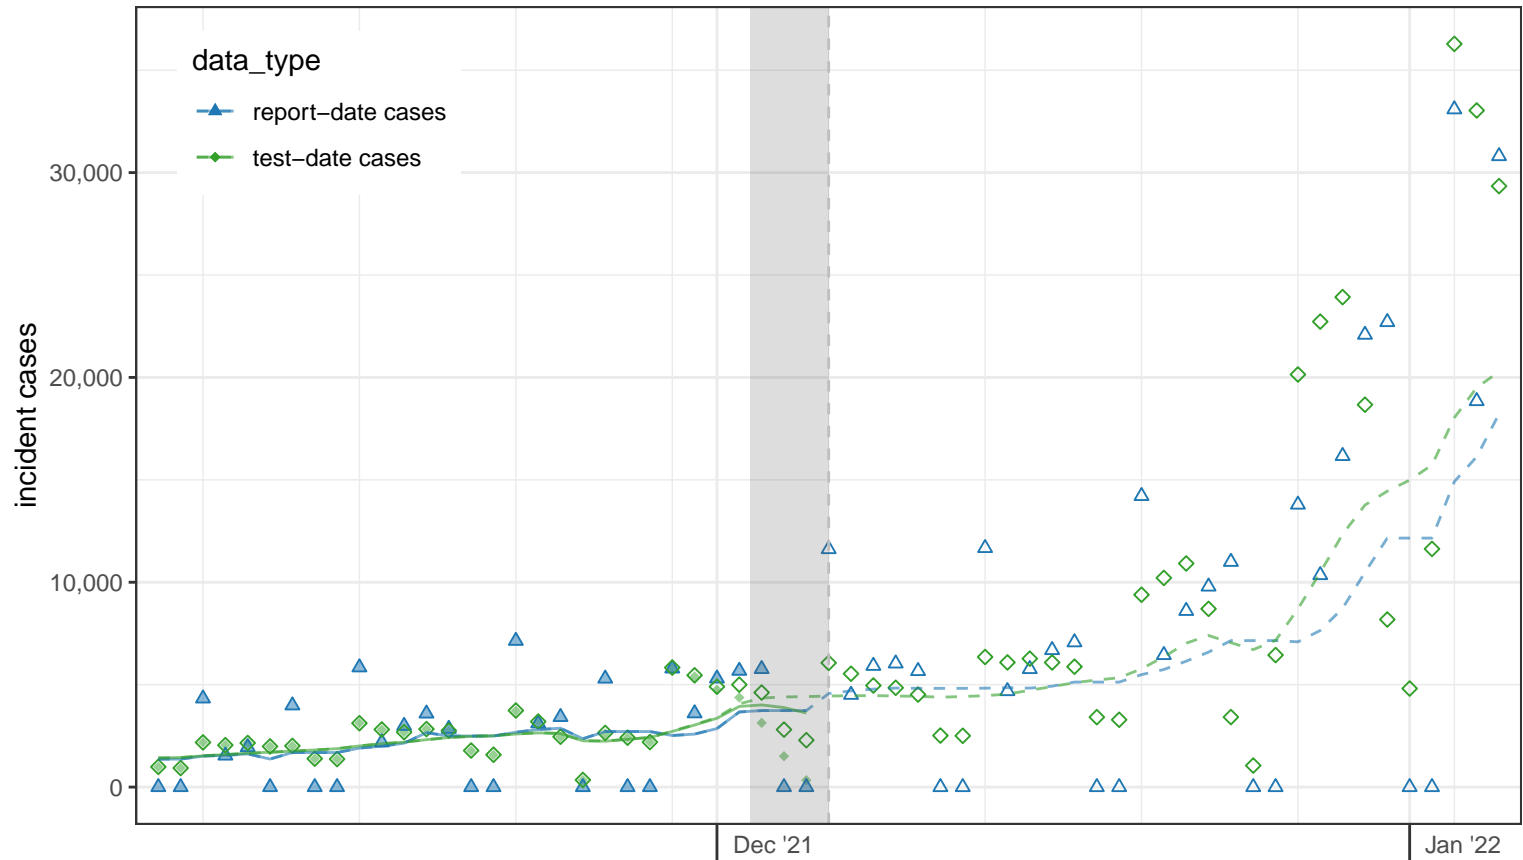

# Massachusetts case data as of: 2021-12-13

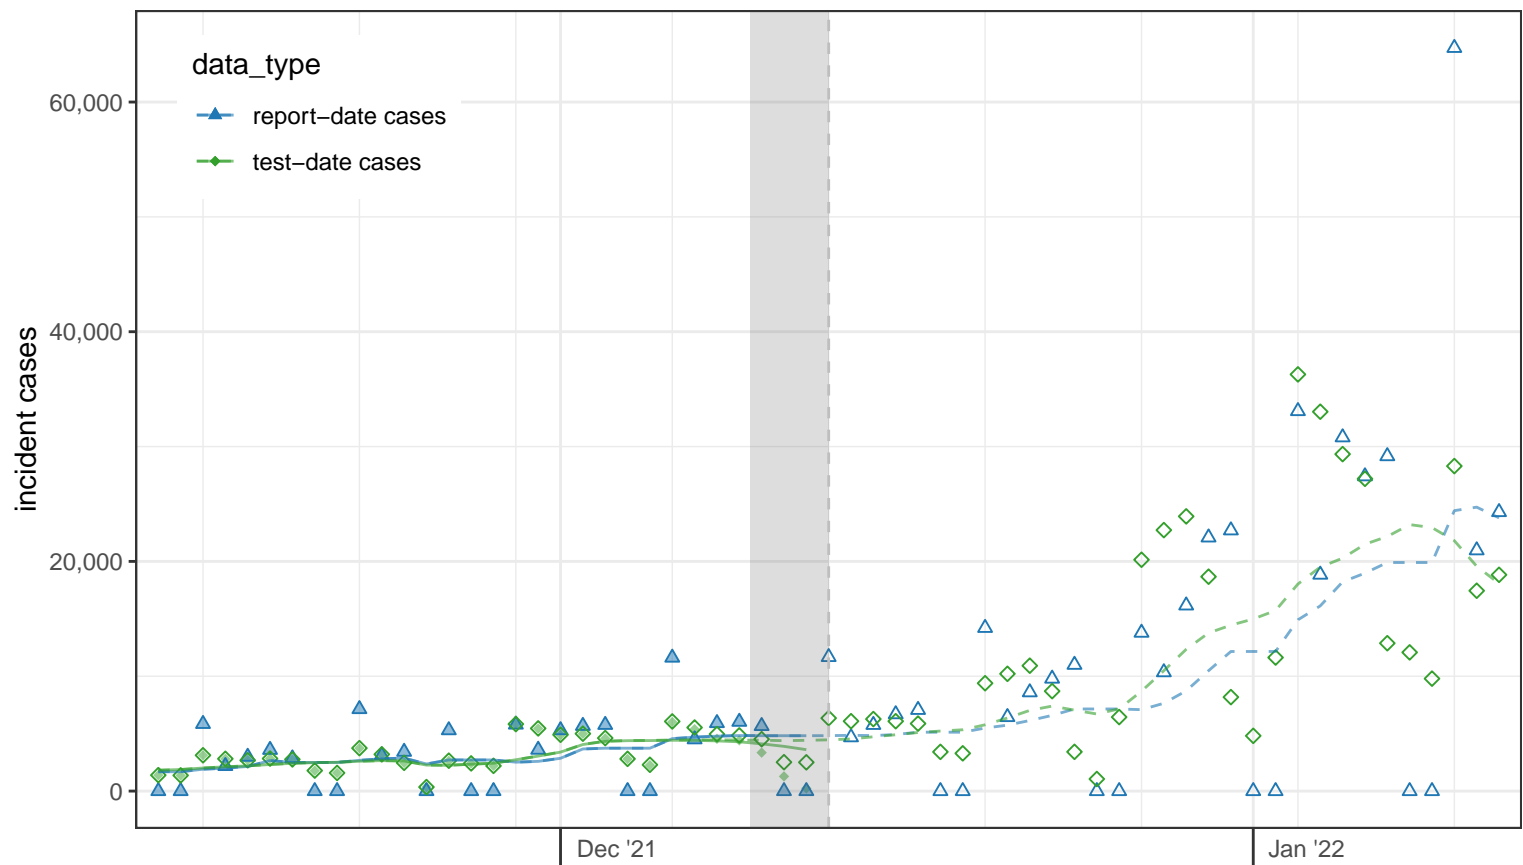

# Massachusetts case data as of: 2021-12-20

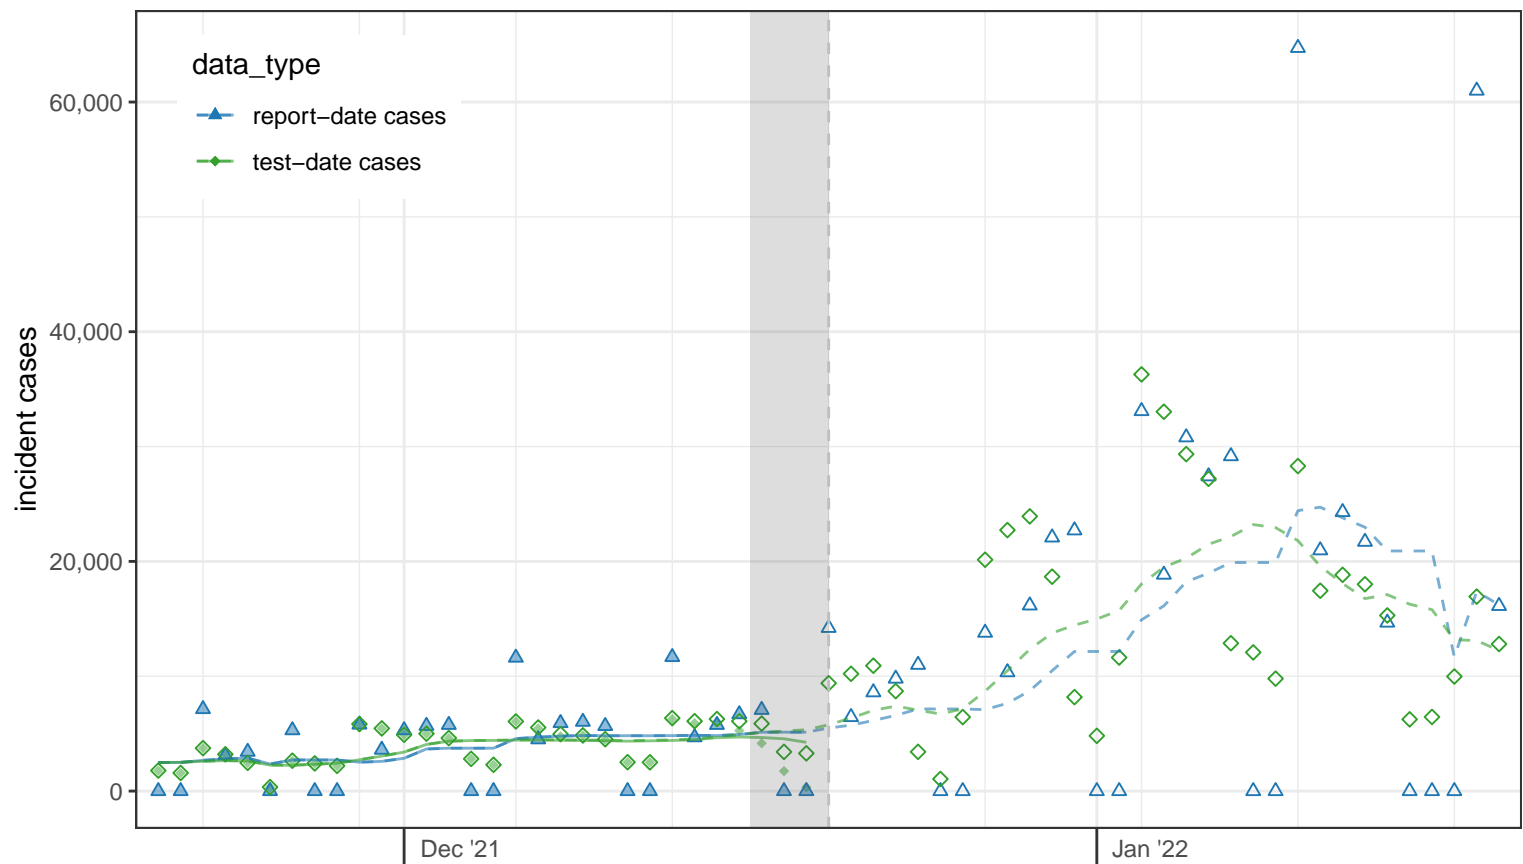

Massachusetts case data as of: 2021-12-27

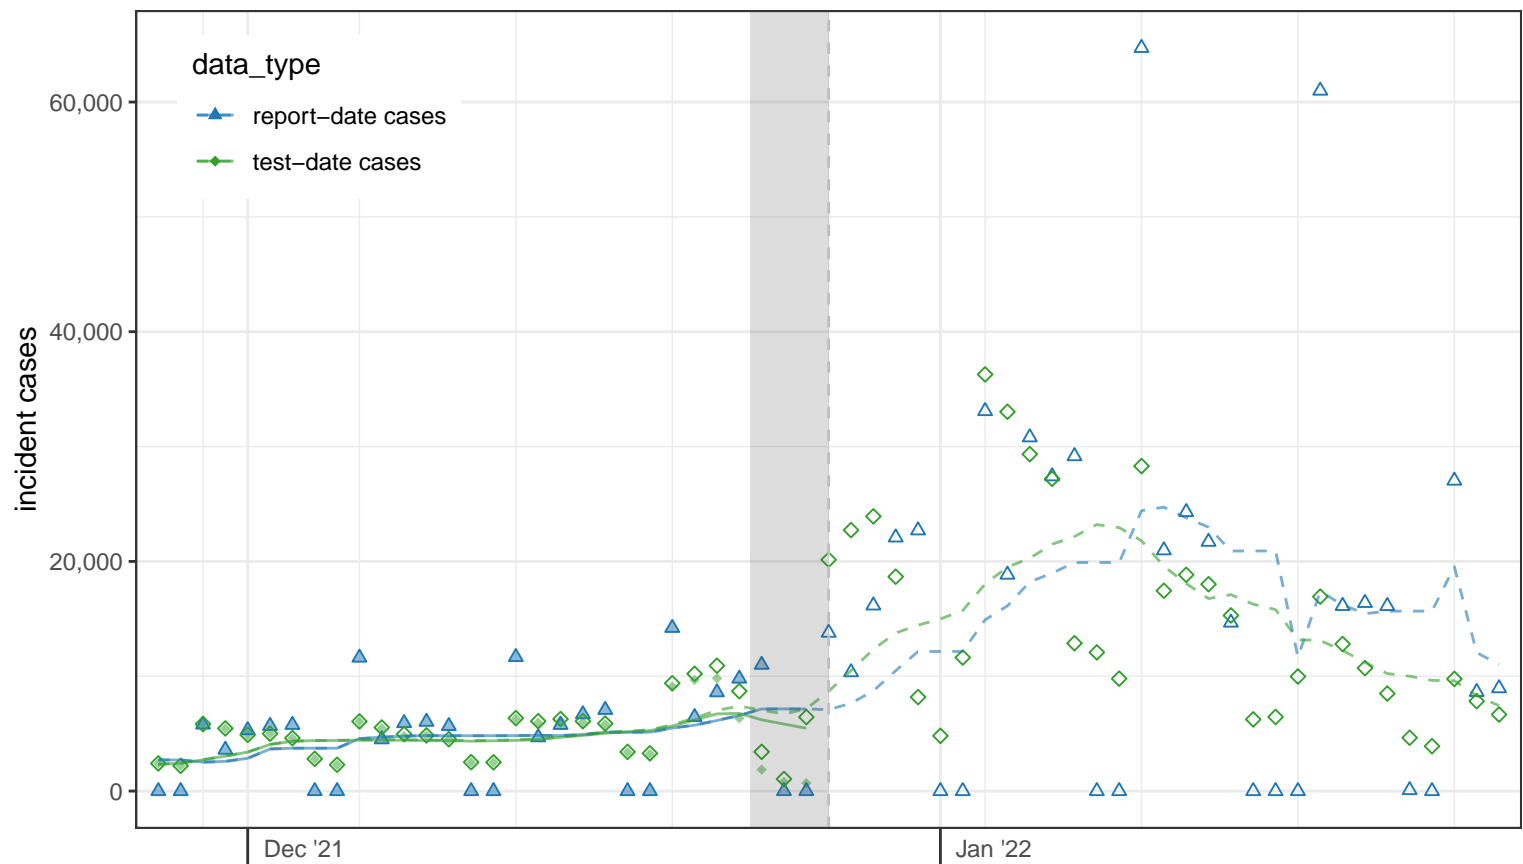

# Massachusetts case data as of: 2022-01-03

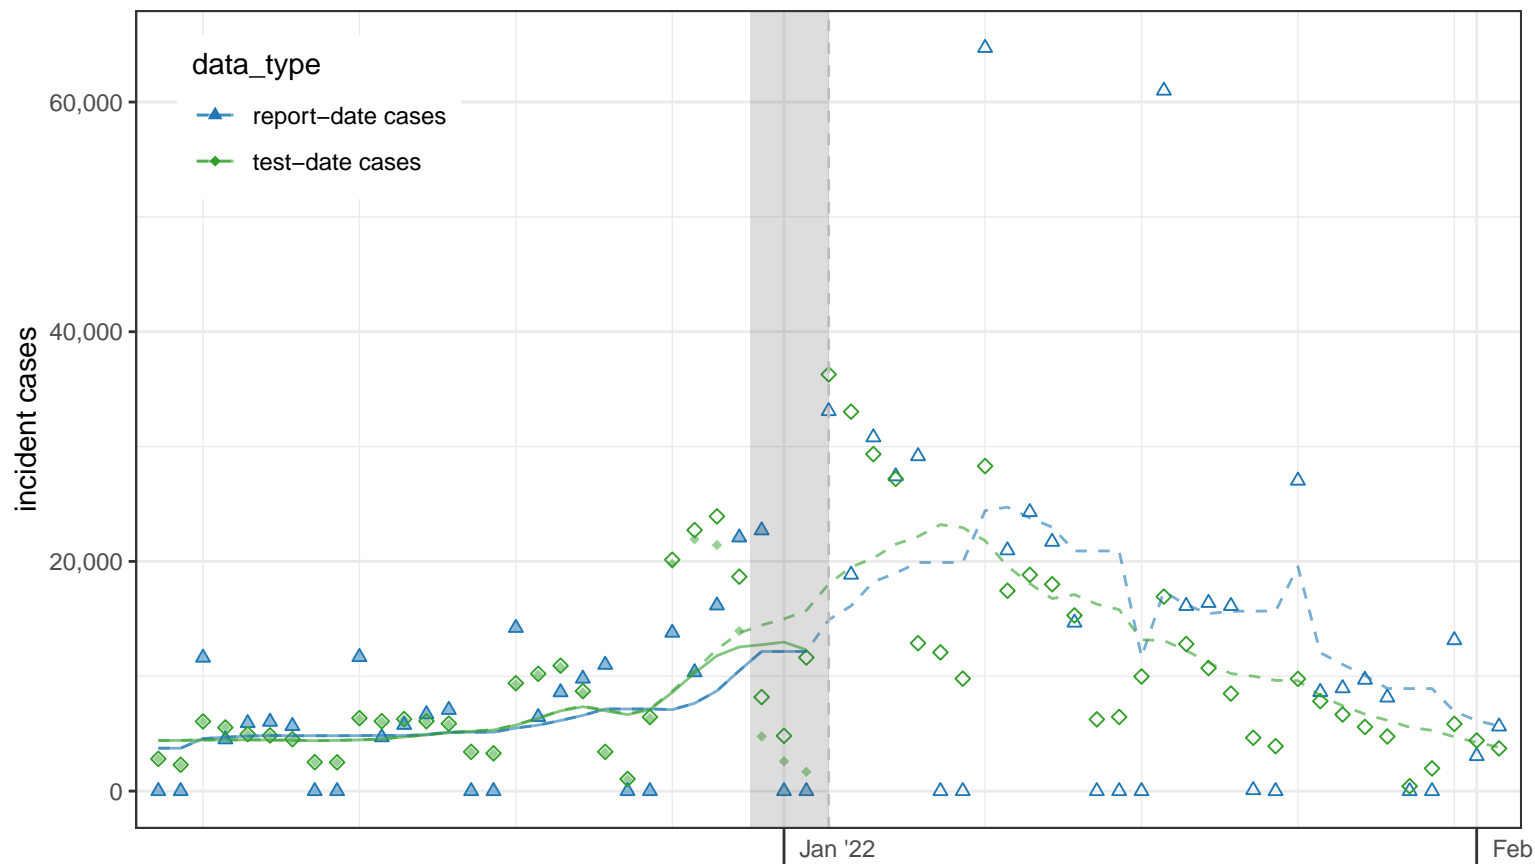

Massachusetts case data as of: 2022-01-10

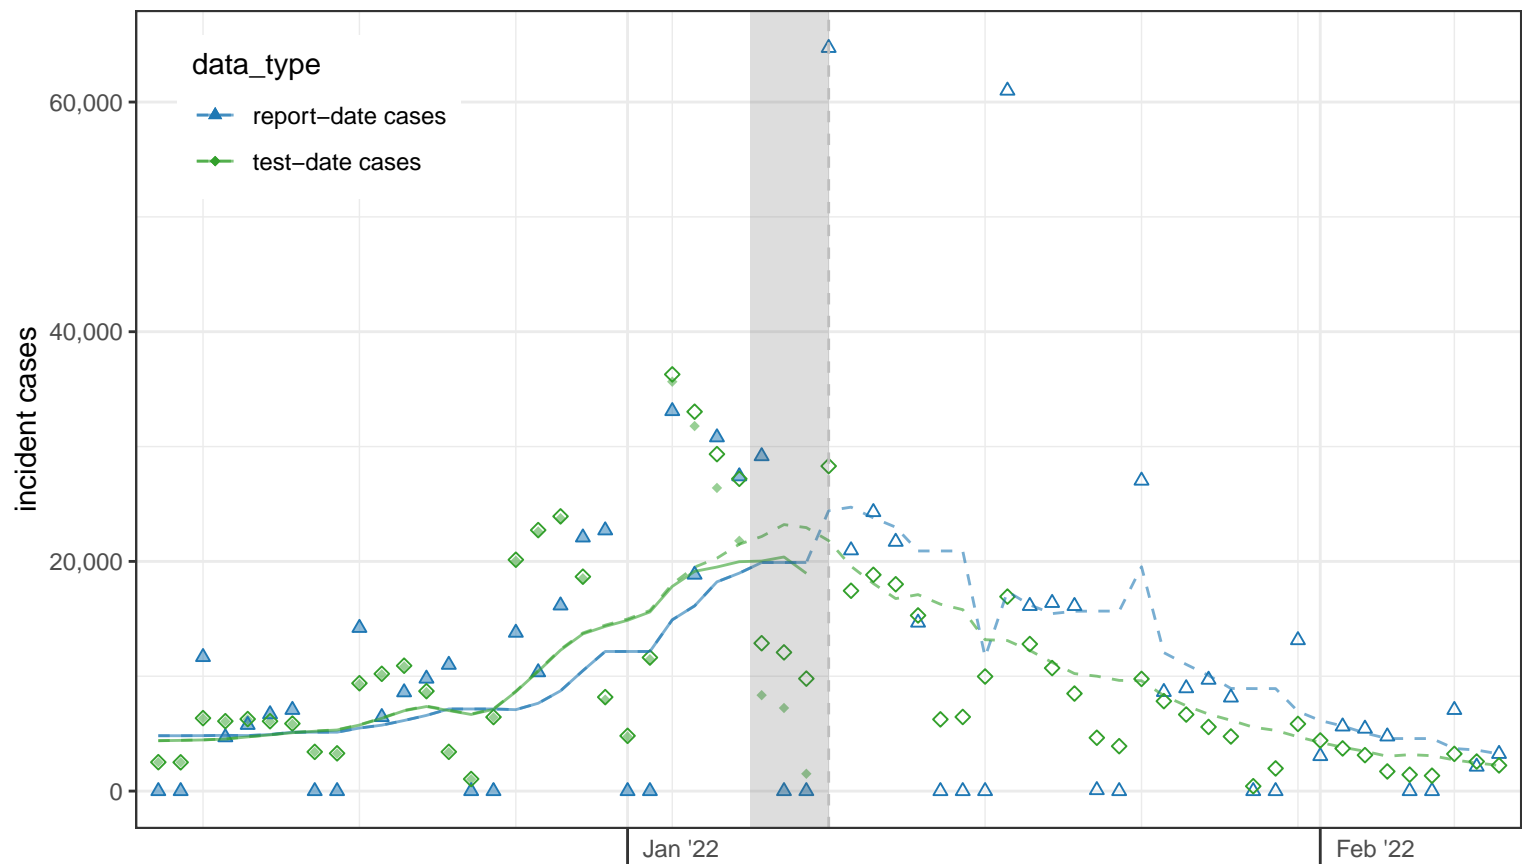



# Massachusetts case data as of: 2022-01-18

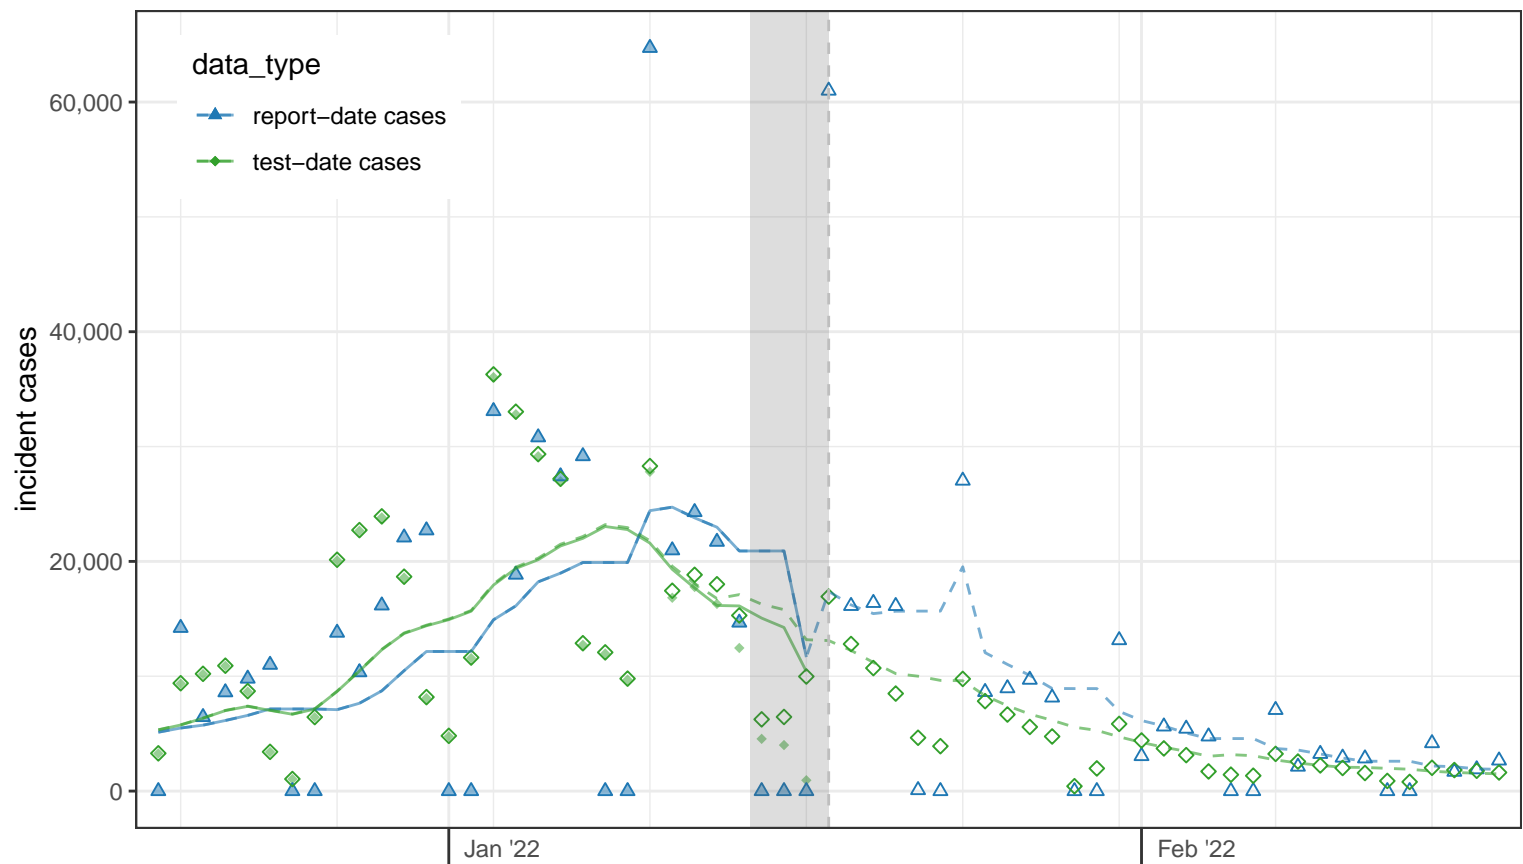

Massachusetts case data as of: 2022-01-24

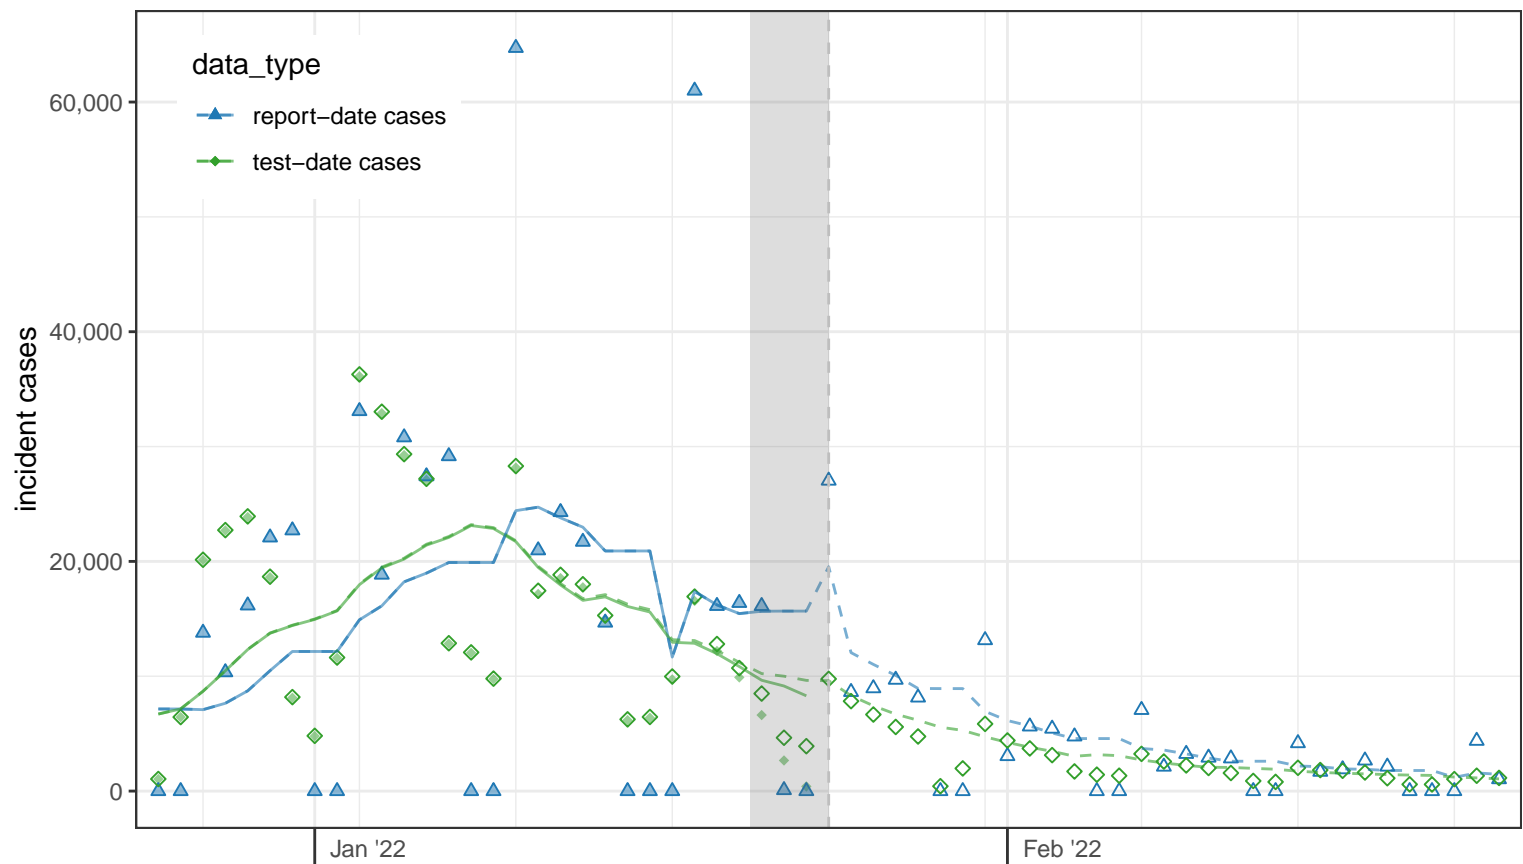

# Massachusetts case data as of: 2022-01-31

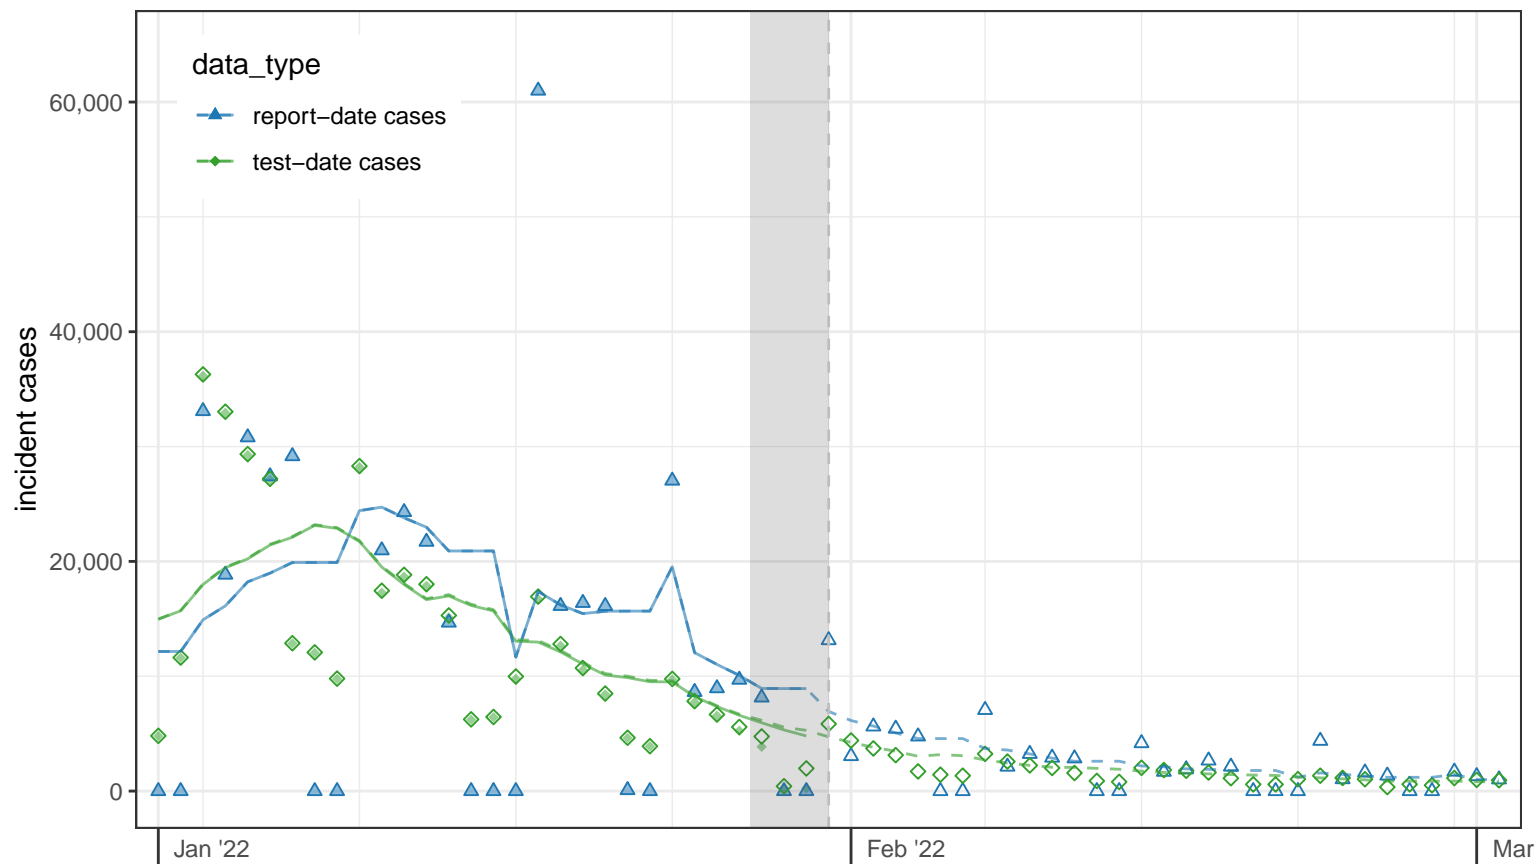

# Massachusetts case data as of: 2022-02-07

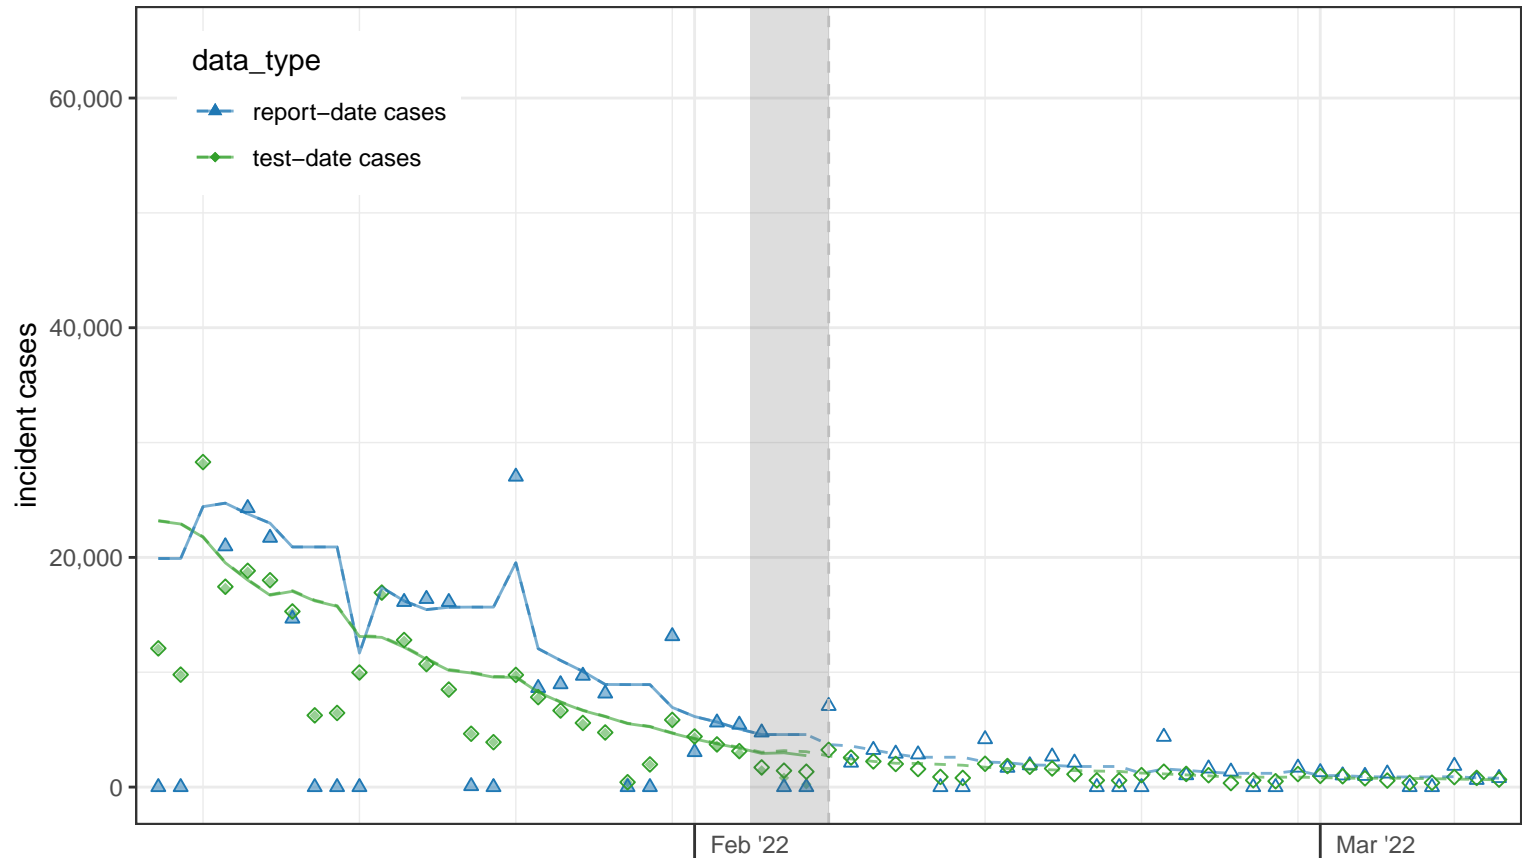

# Massachusetts case data as of: 2022-02-14

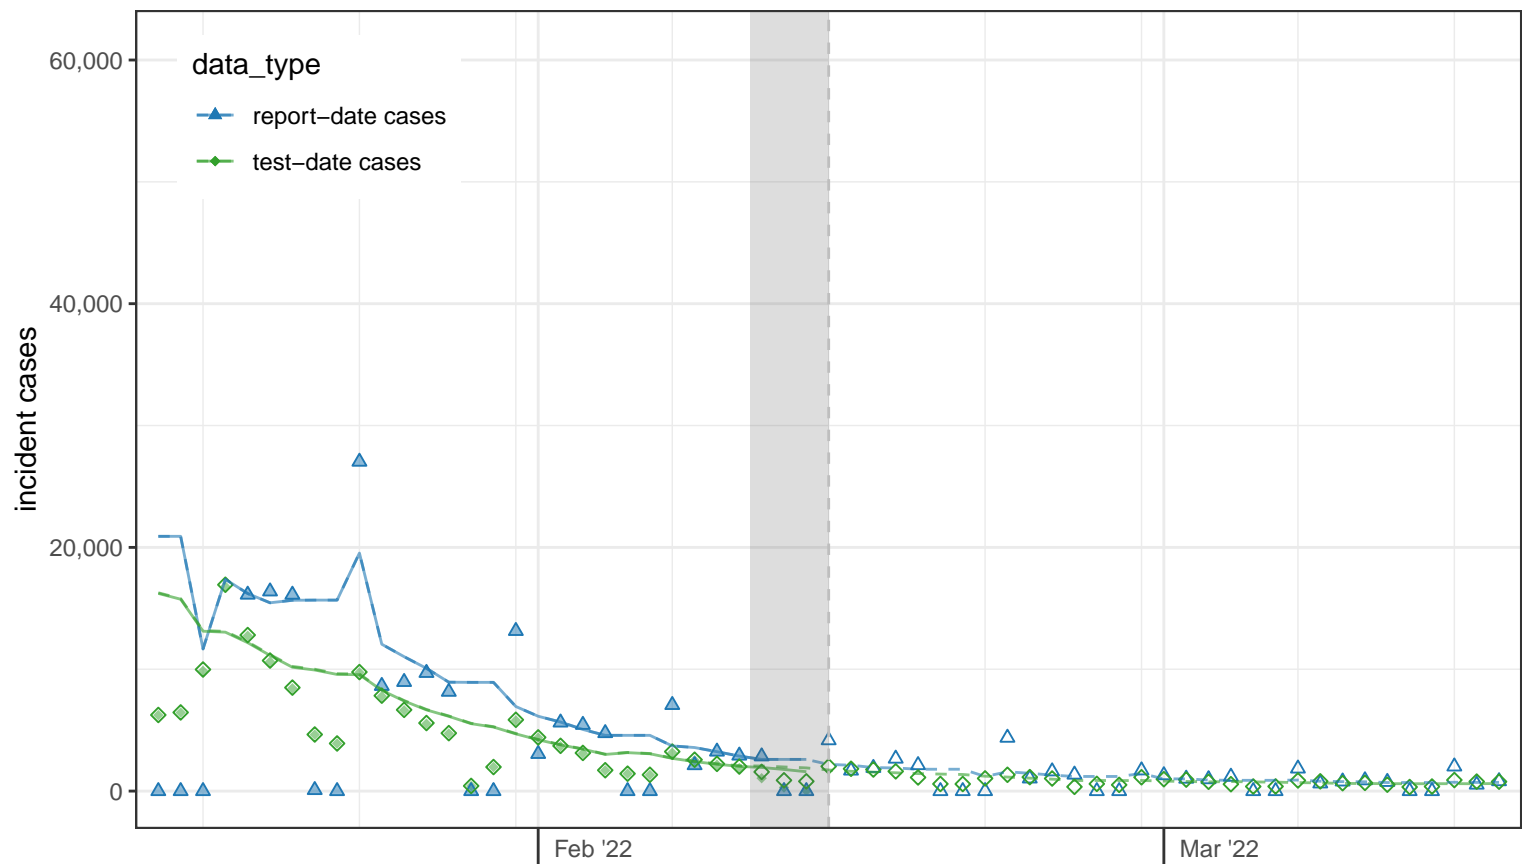

# Massachusetts case data as of: 2022-02-28

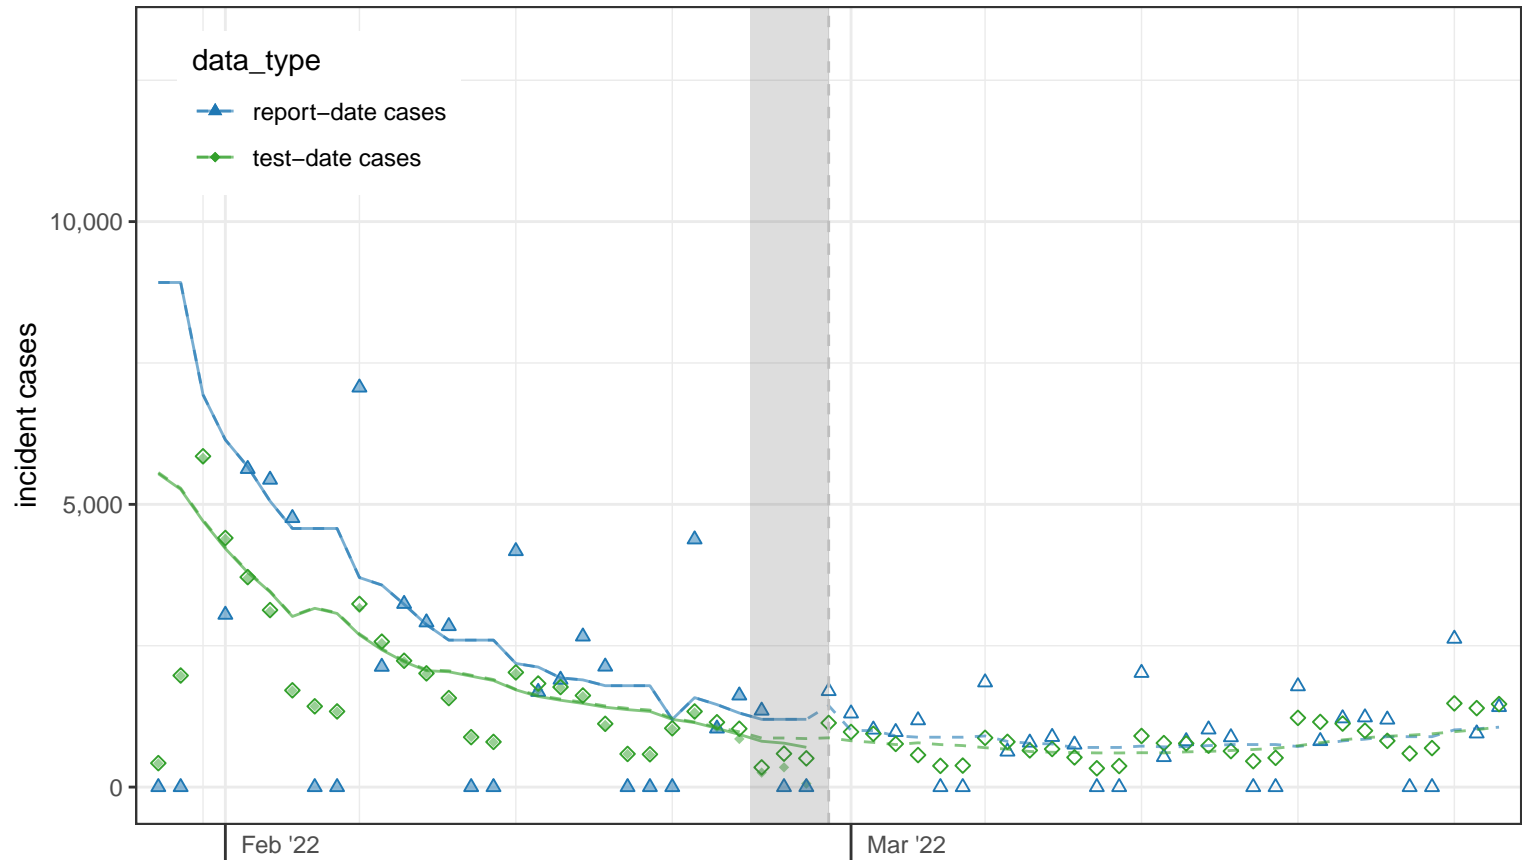

# Massachusetts case data as of: 2022-03-07

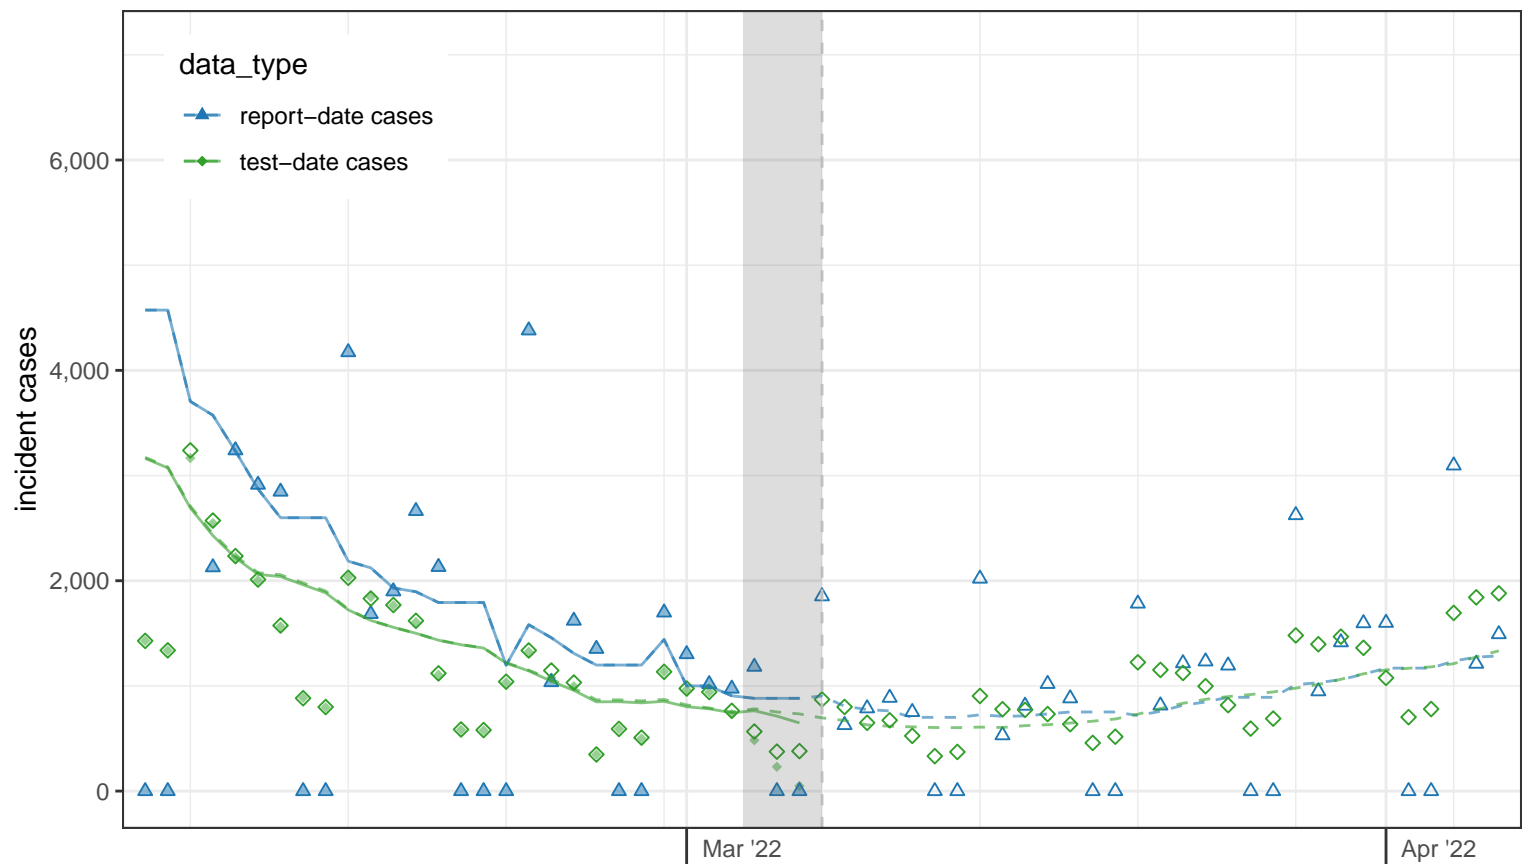

# Massachusetts case data as of: 2022-03-14

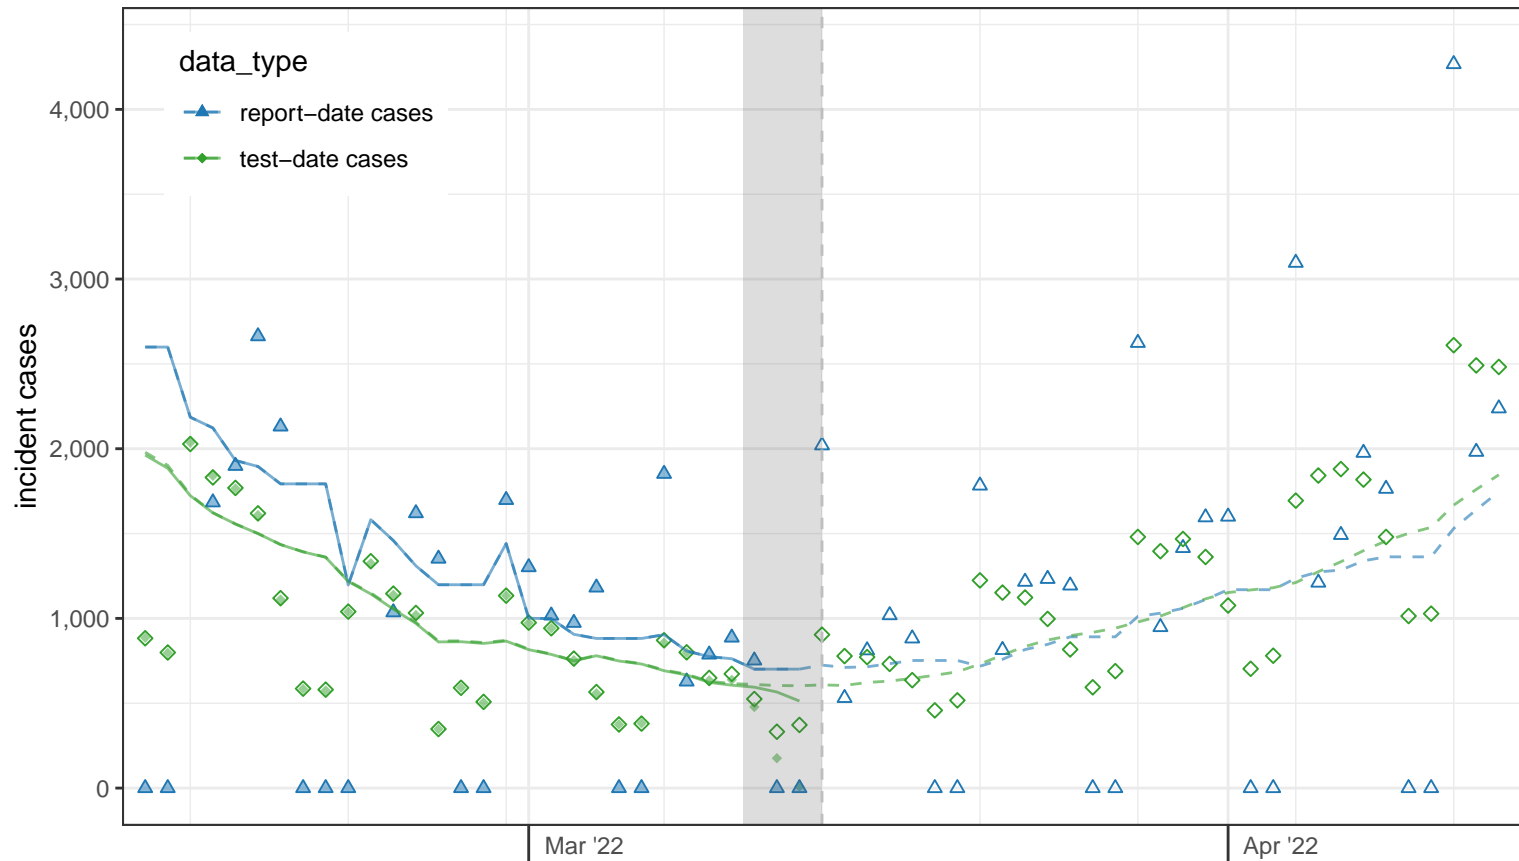



# Massachusetts case data as of: 2022-03-21

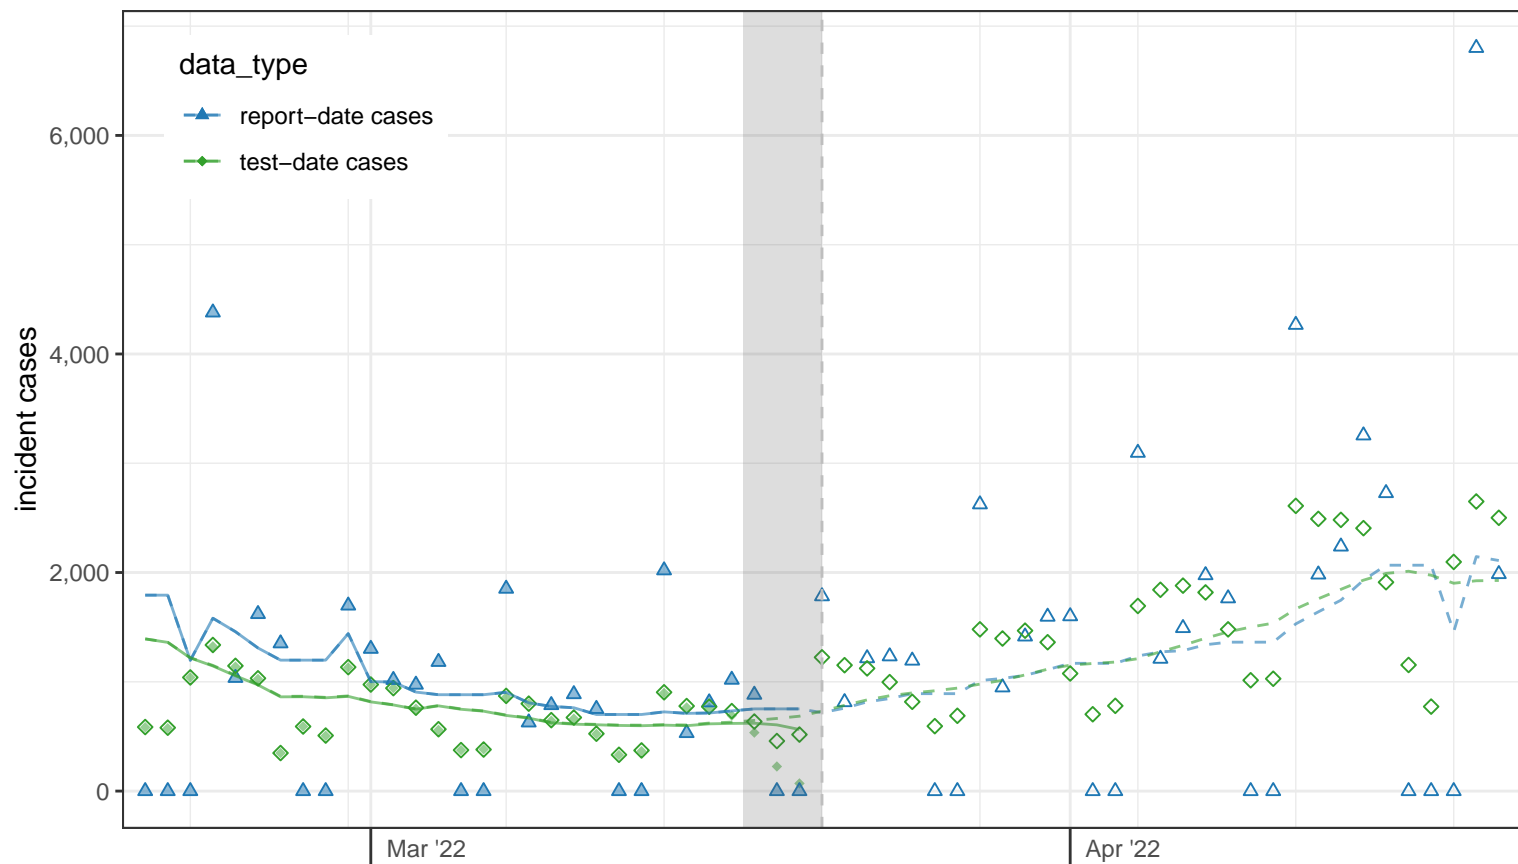

# Massachusetts case data as of: 2022-03-28

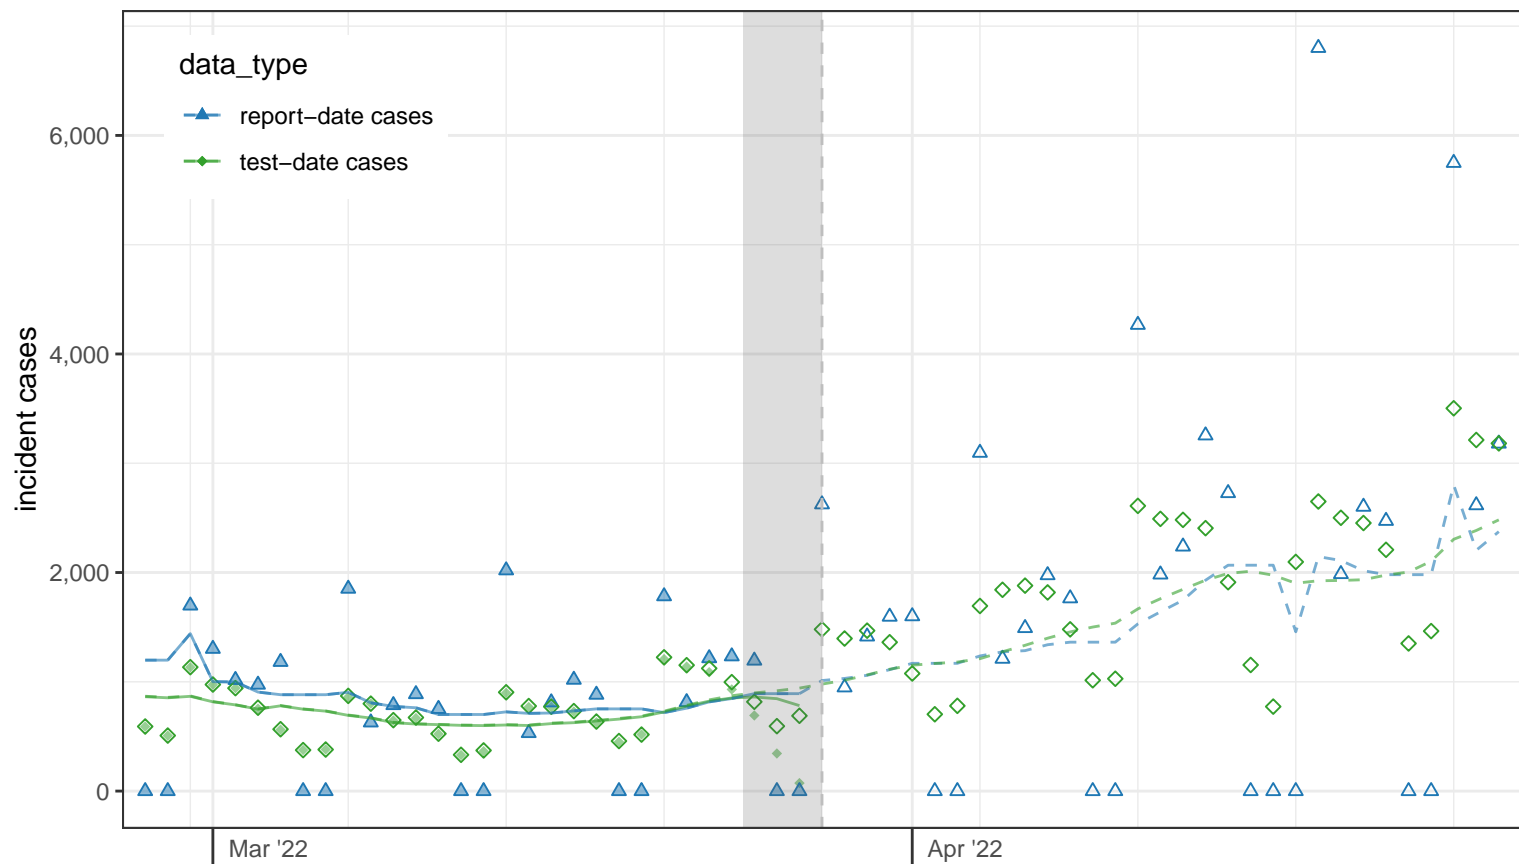

# Massachusetts case data as of: 2022-04-04

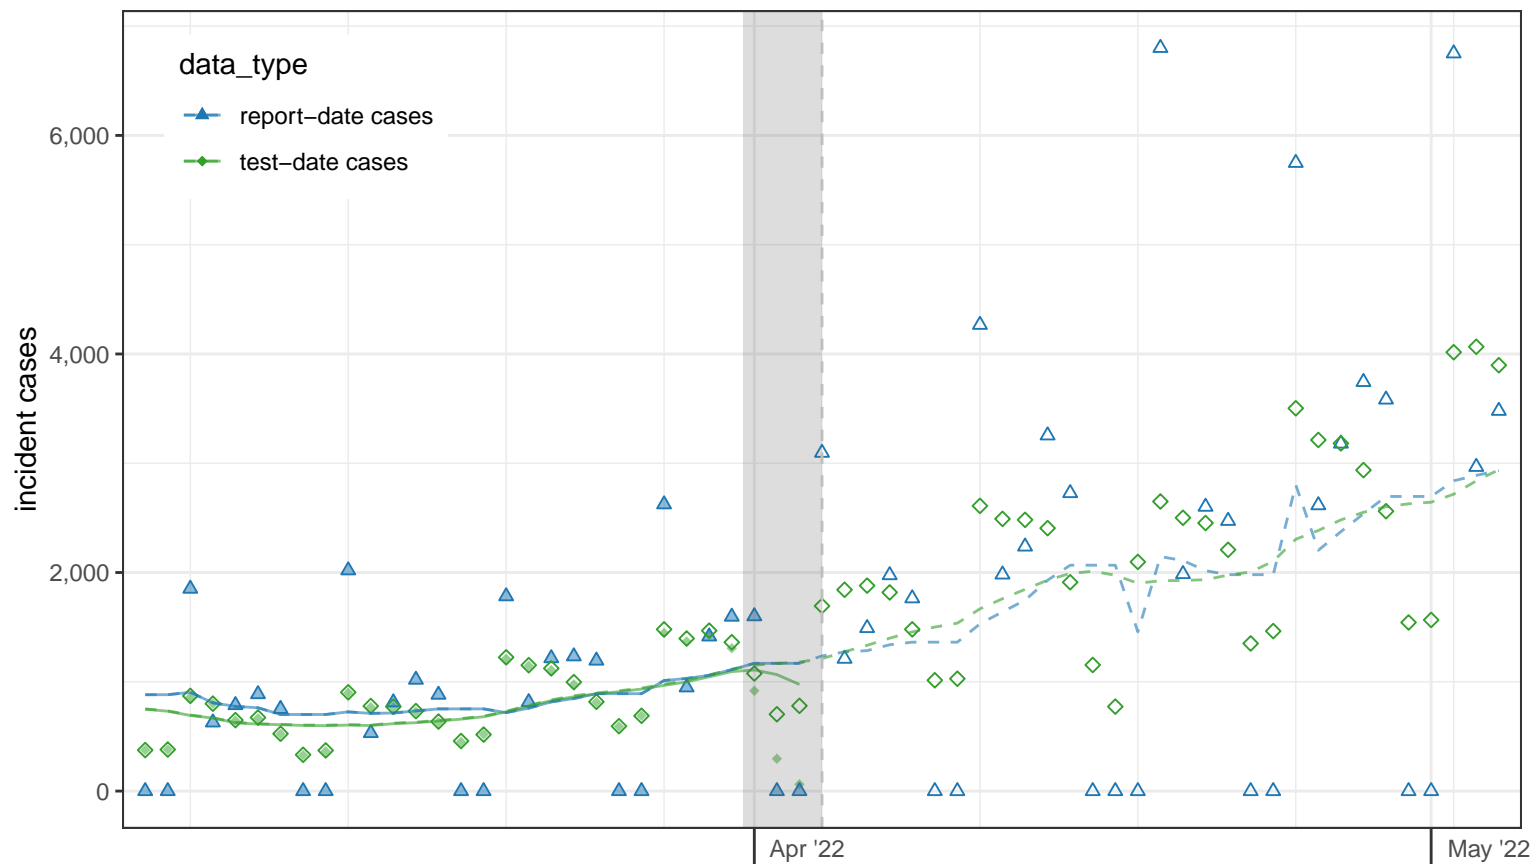

# Massachusetts case data as of: 2022-04-11

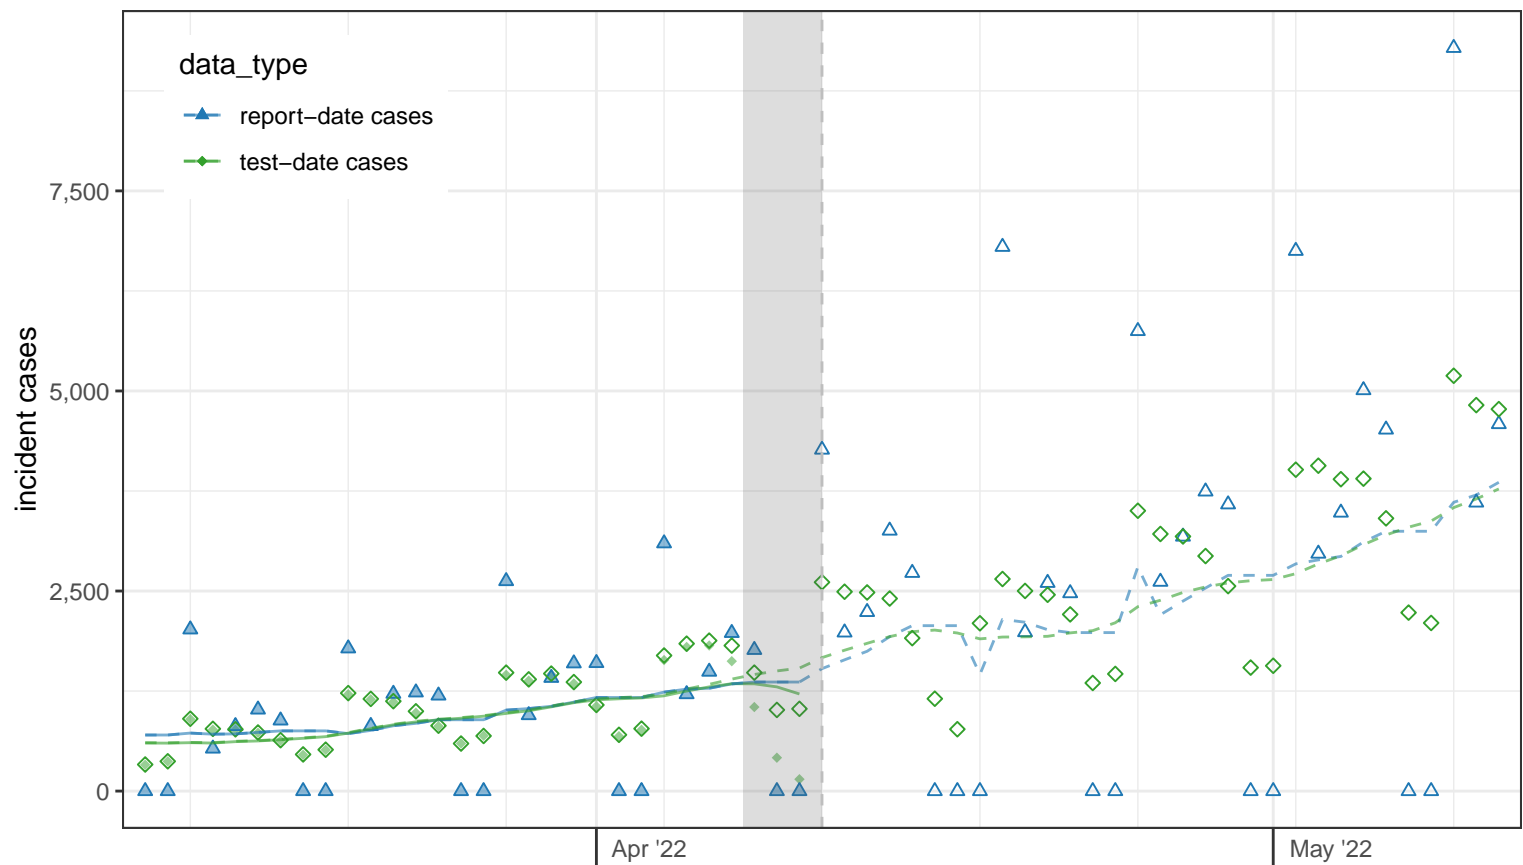

# Massachusetts case data as of: 2022-04-25

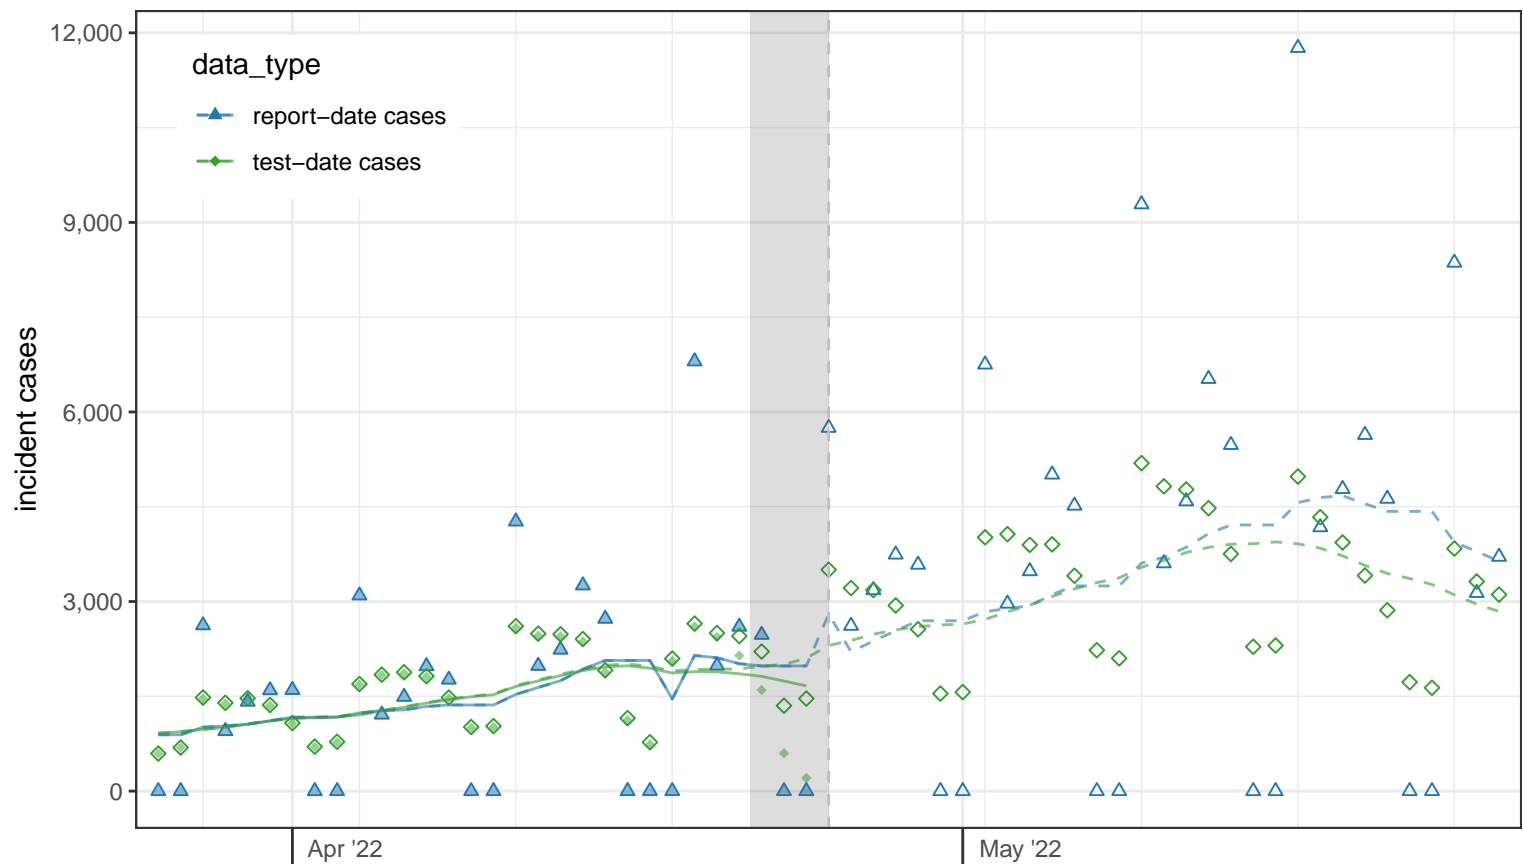

# Massachusetts case data as of: 2022-05-02

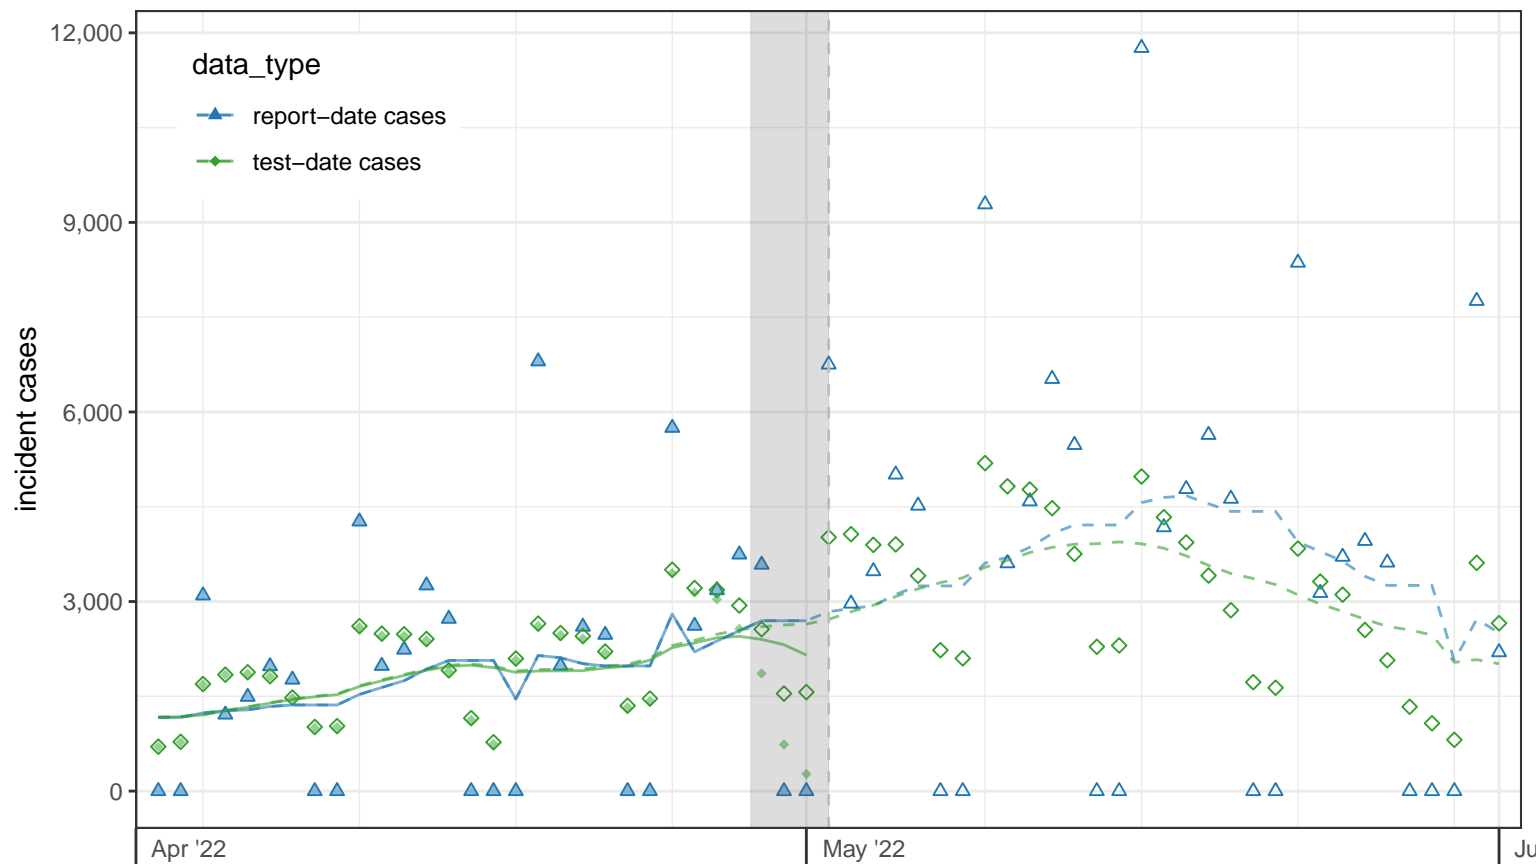

Massachusetts case data as of: 2022-05-09

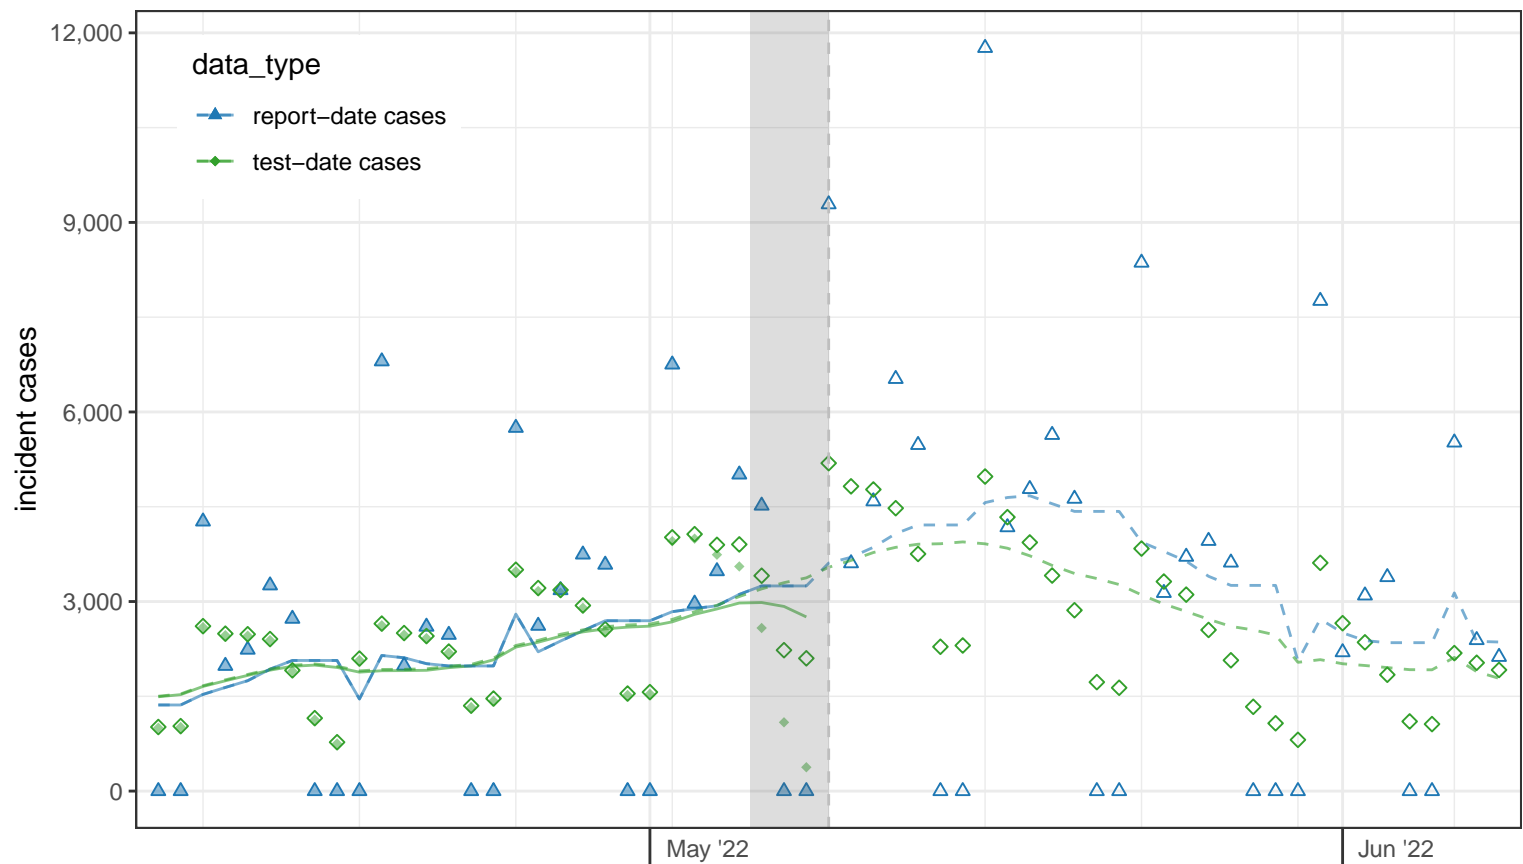

Massachusetts case data as of: 2022-05-16

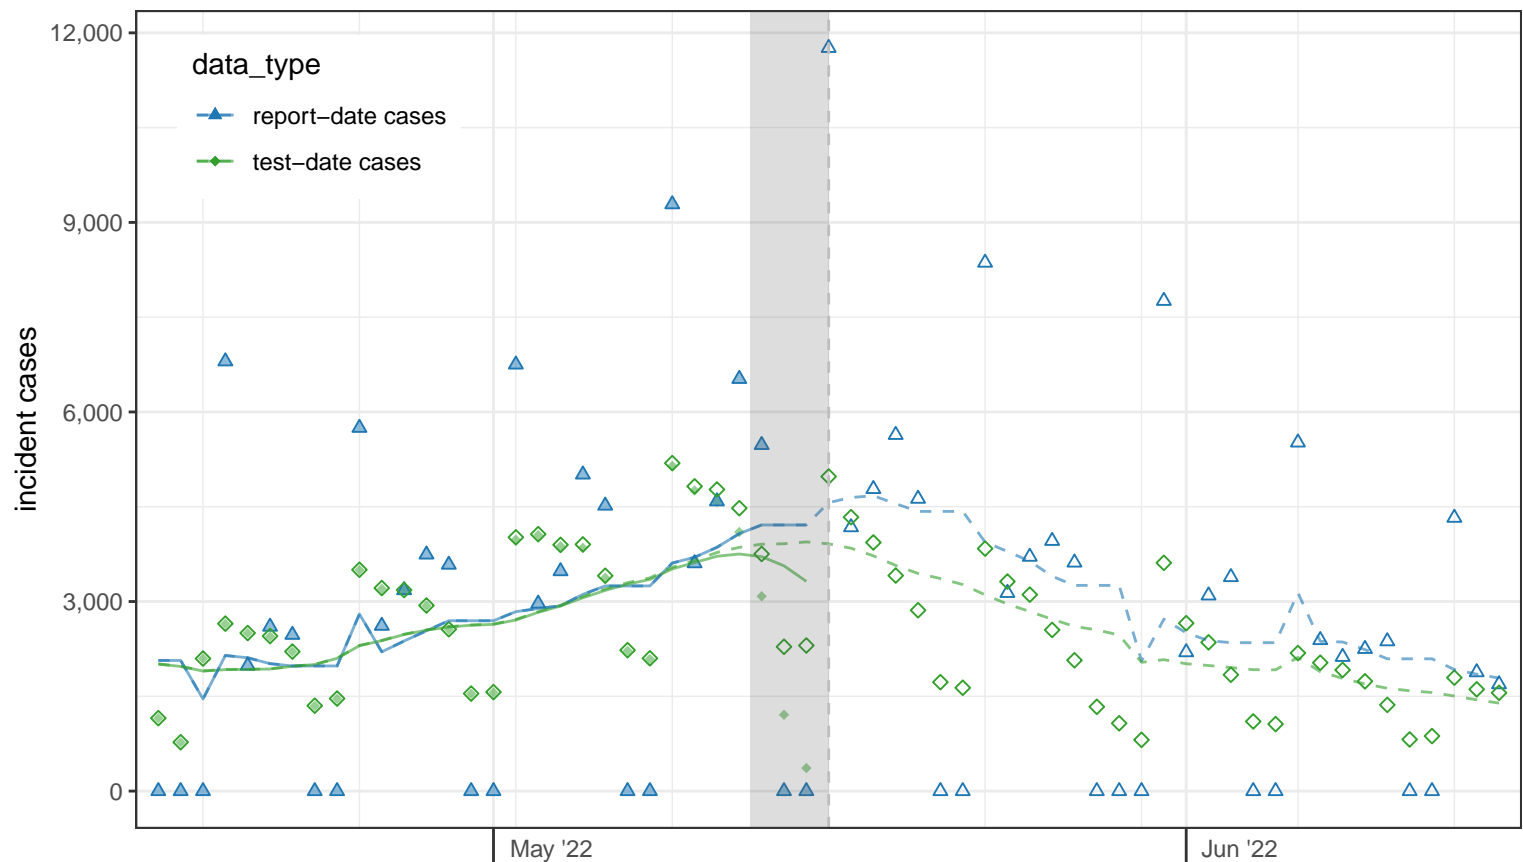



# Massachusetts case data as of: 2022-05-23

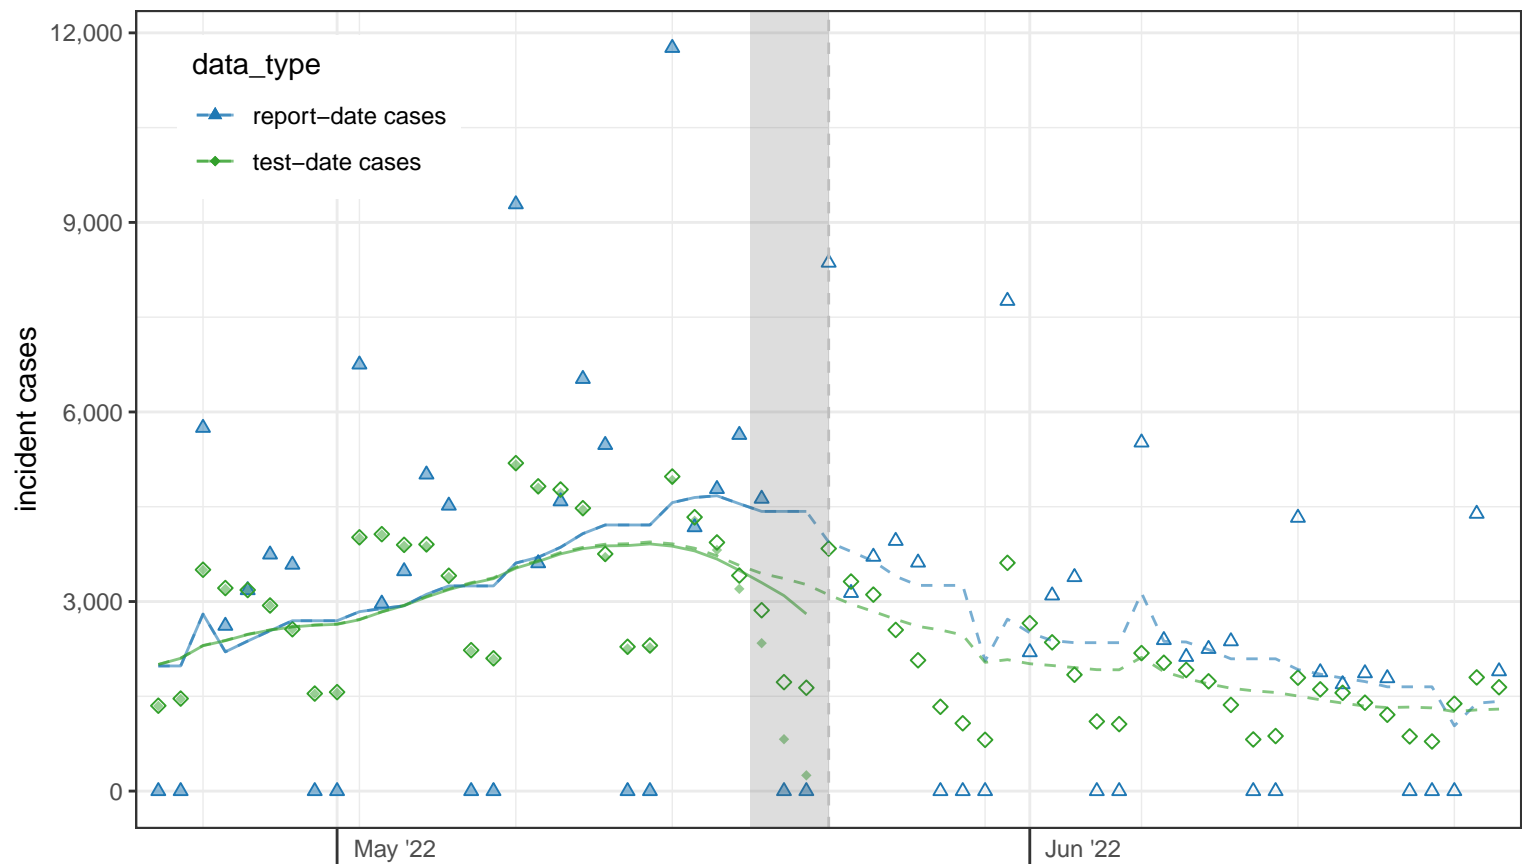

Massachusetts case data as of: 2022-06-06

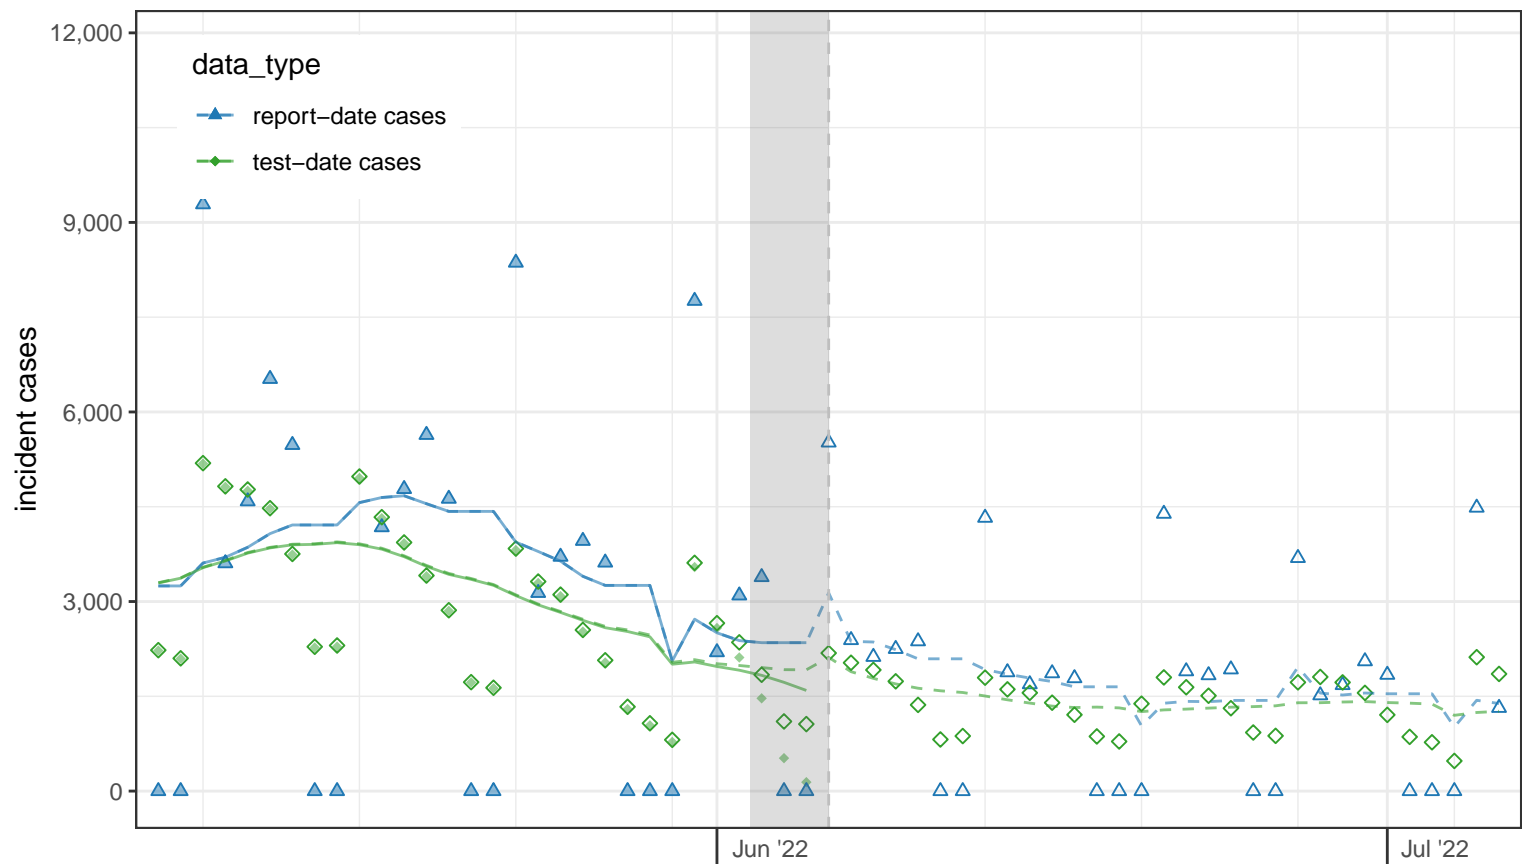

Massachusetts case data as of: 2022-06-13

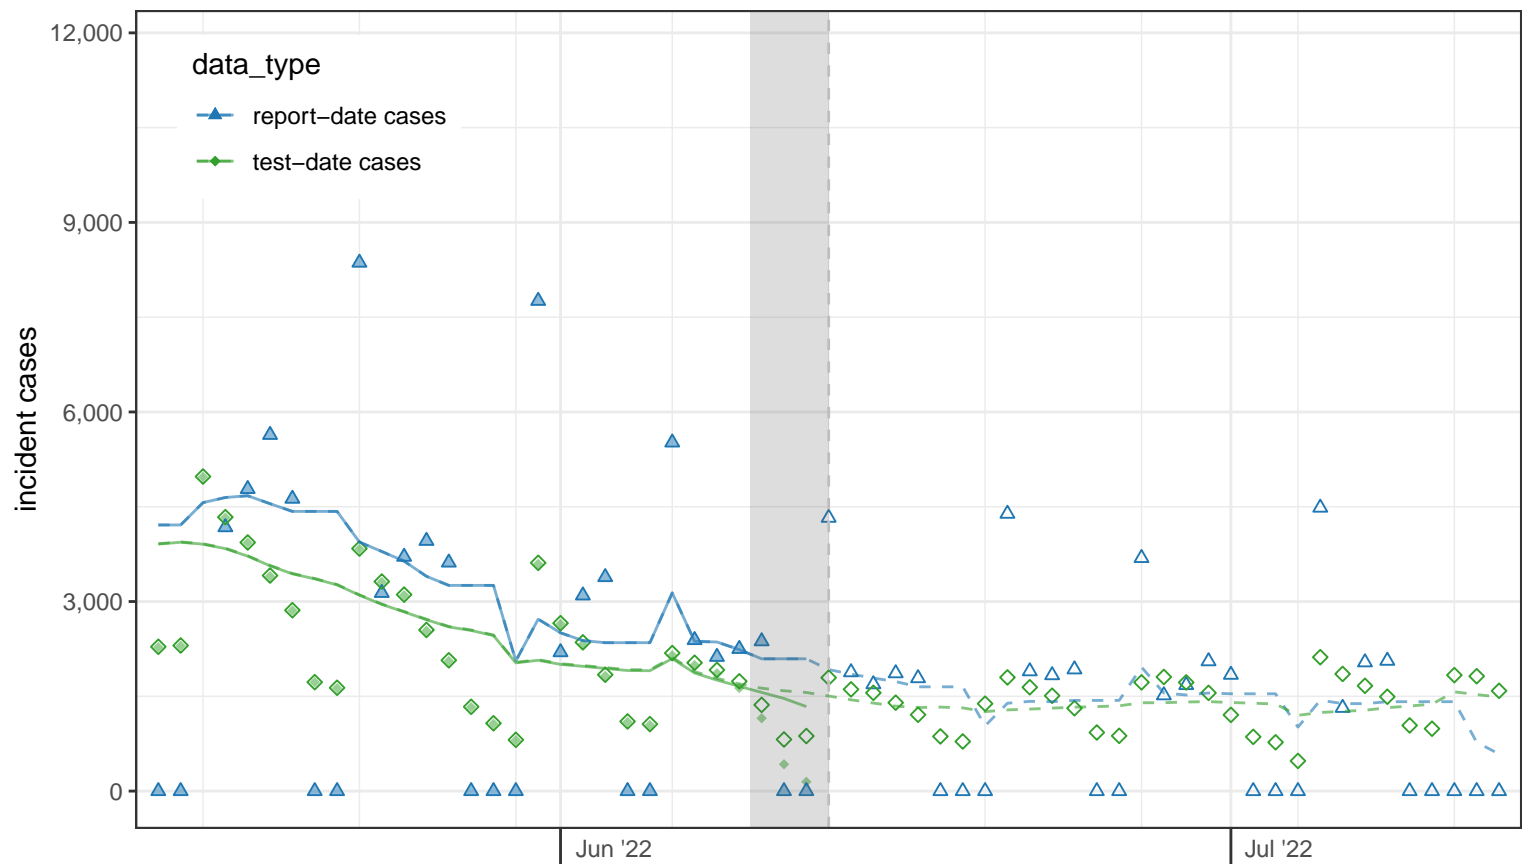

Massachusetts case data as of: 2022-06-27

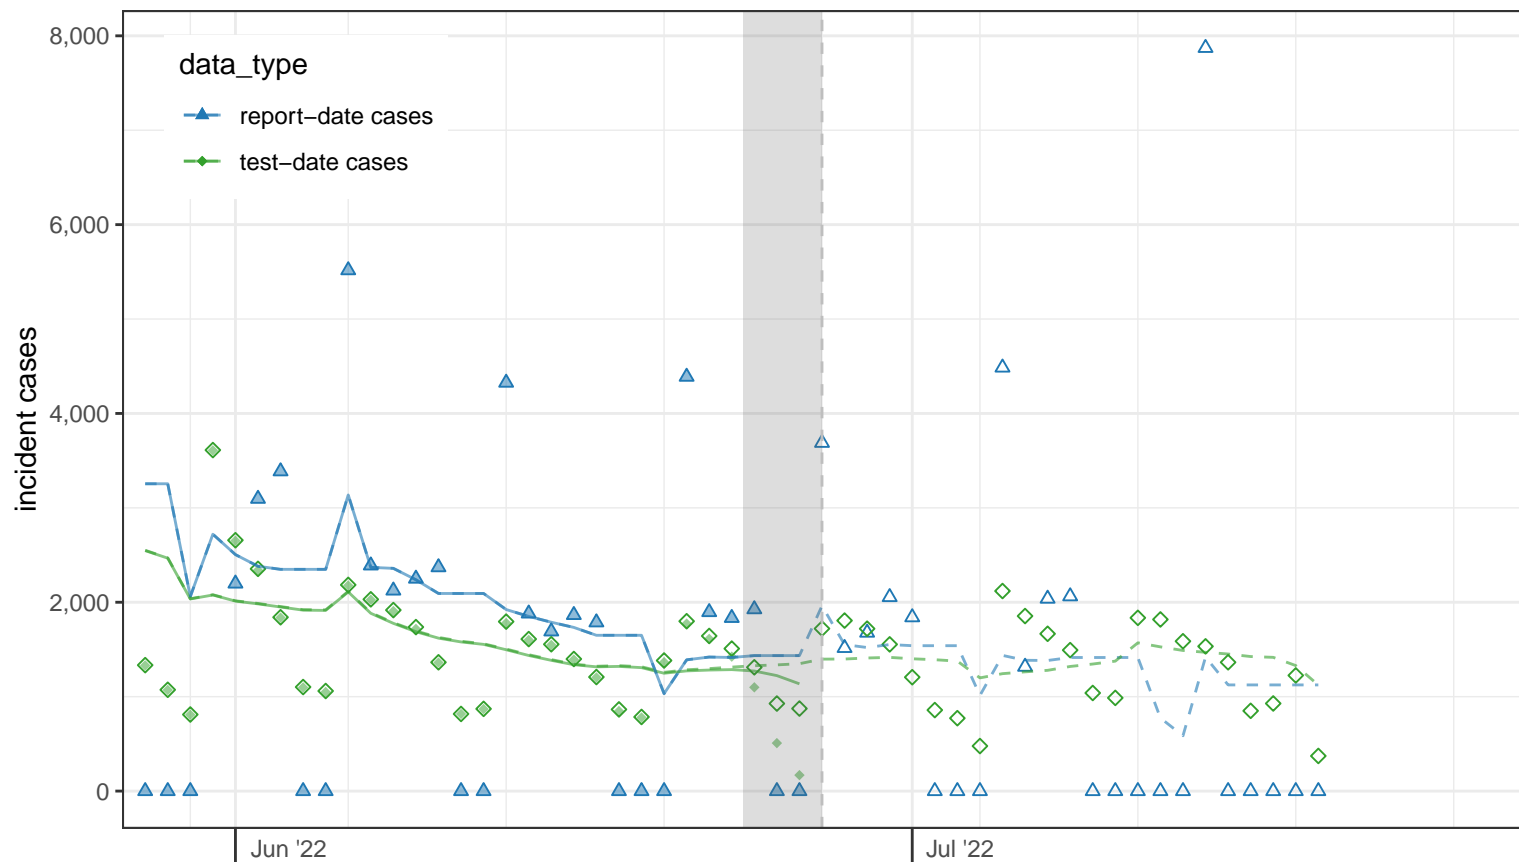

Supplement: Supplementary file [file media-1.pdf]
