# Supplementary material for: Assessing the utility of COVID-19 case reports as a leading indicator for hospitalization forecasting in the United States
Source: bioRxiv or medRxiv preprint supplement (doi:10.1101/2023.03.08.23286582), 2023-03-10

### California case data and forecasts: 2020-12-07

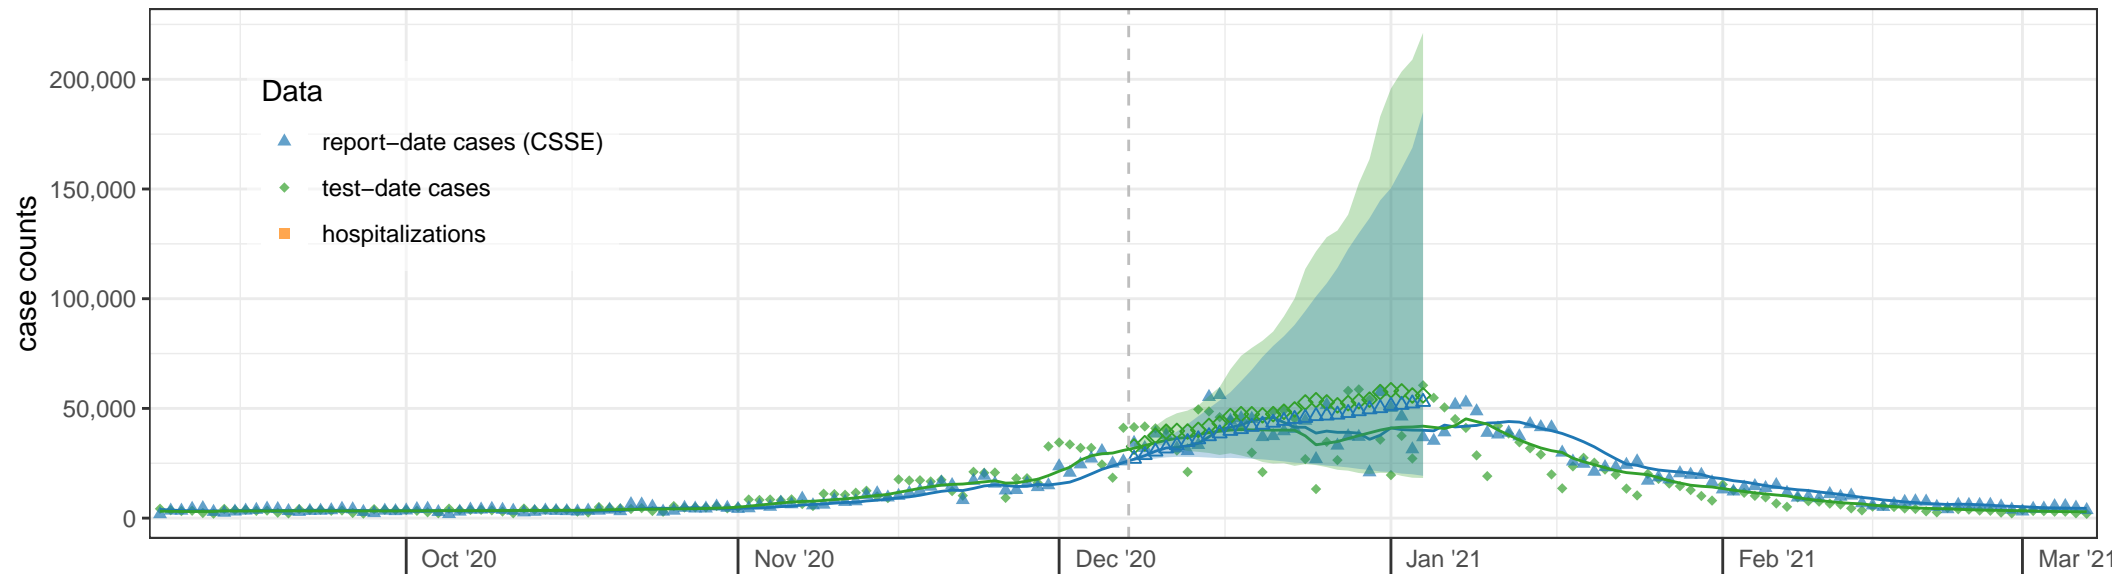

### California hospitalization data and forecasts: 2020-12-07

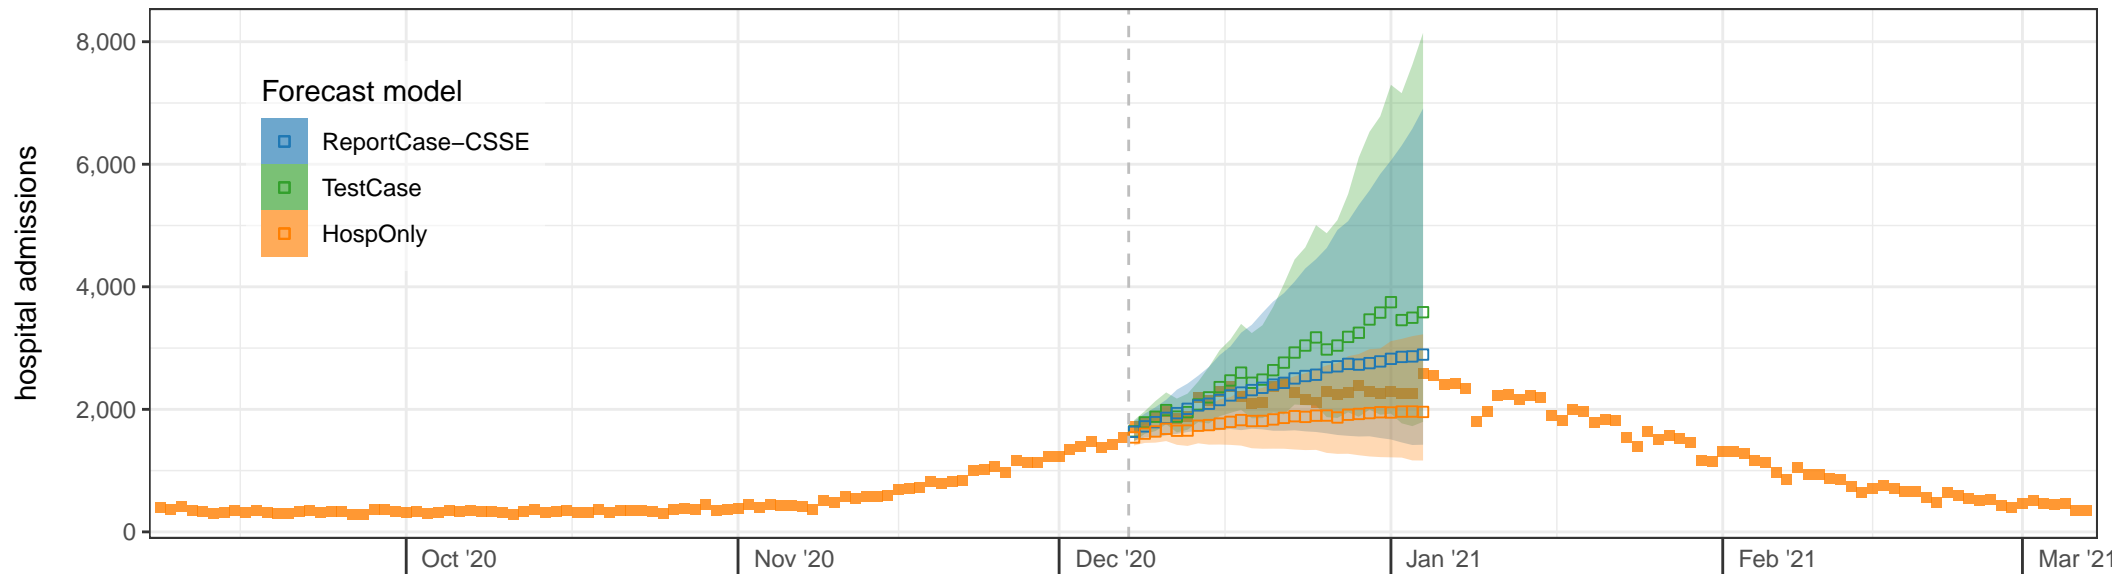

### California case data and forecasts: 2020-12-14

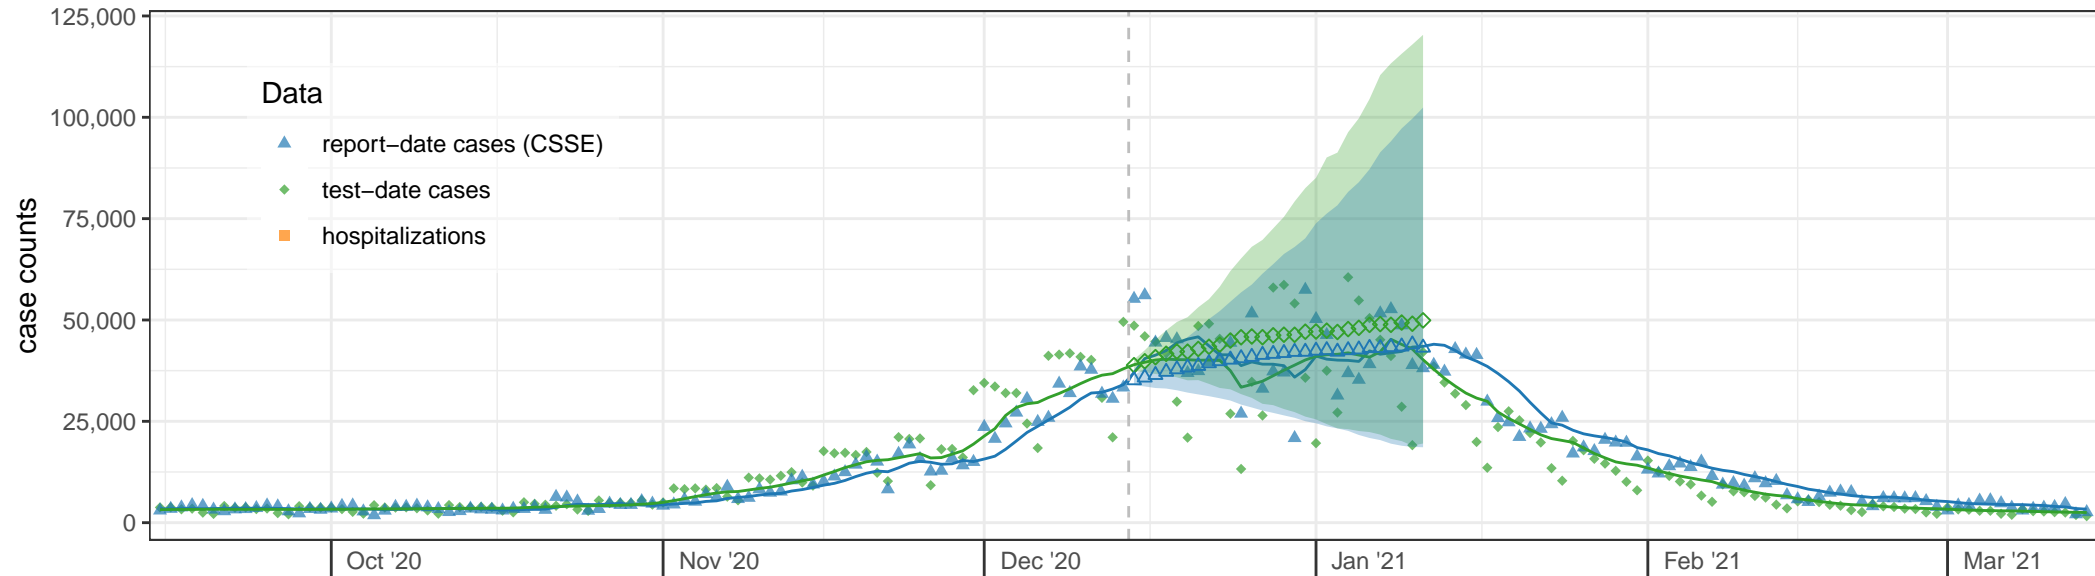

### California hospitalization data and forecasts: 2020-12-14

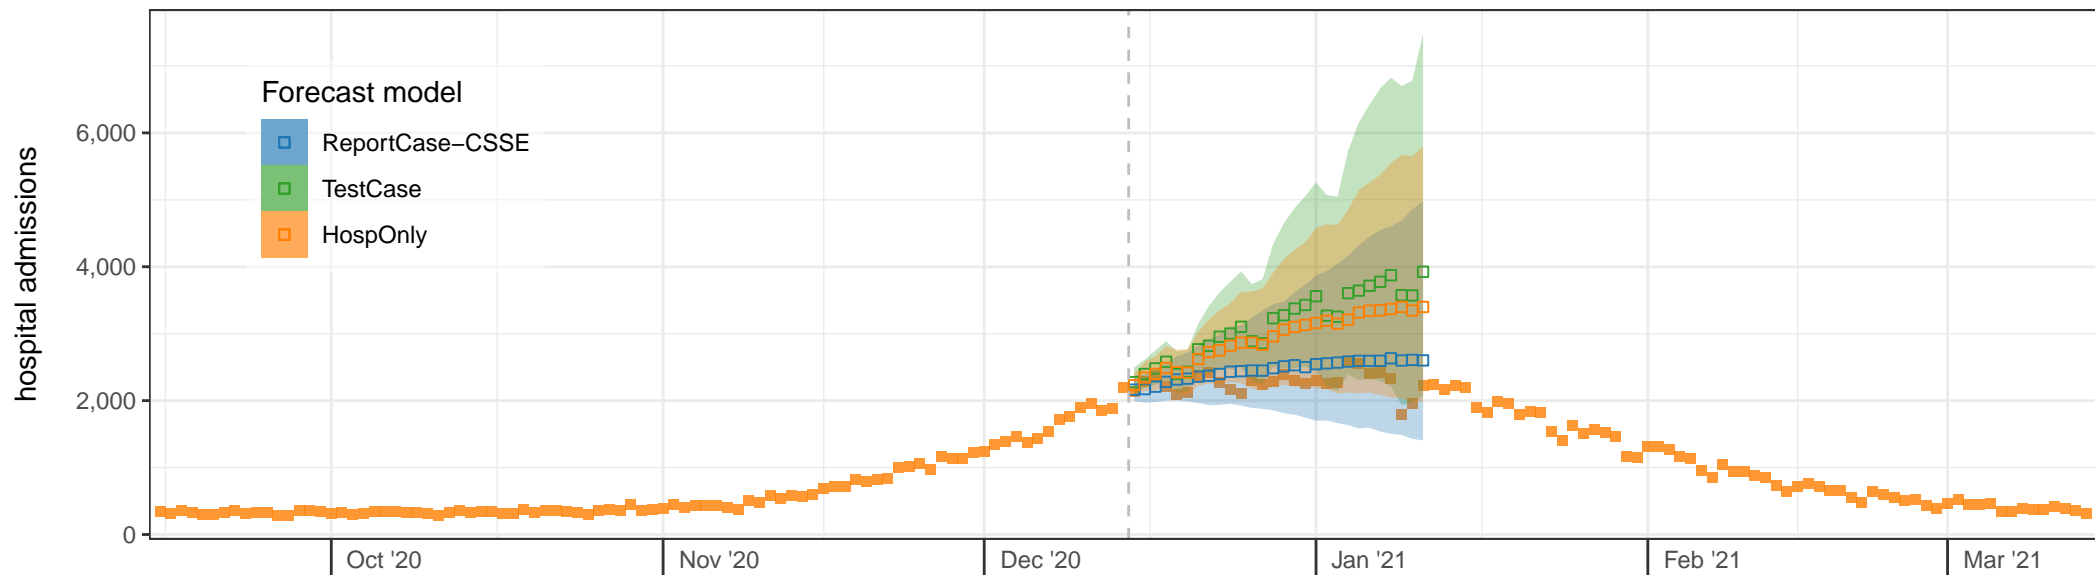

California case data and forecasts: 2020–12–21

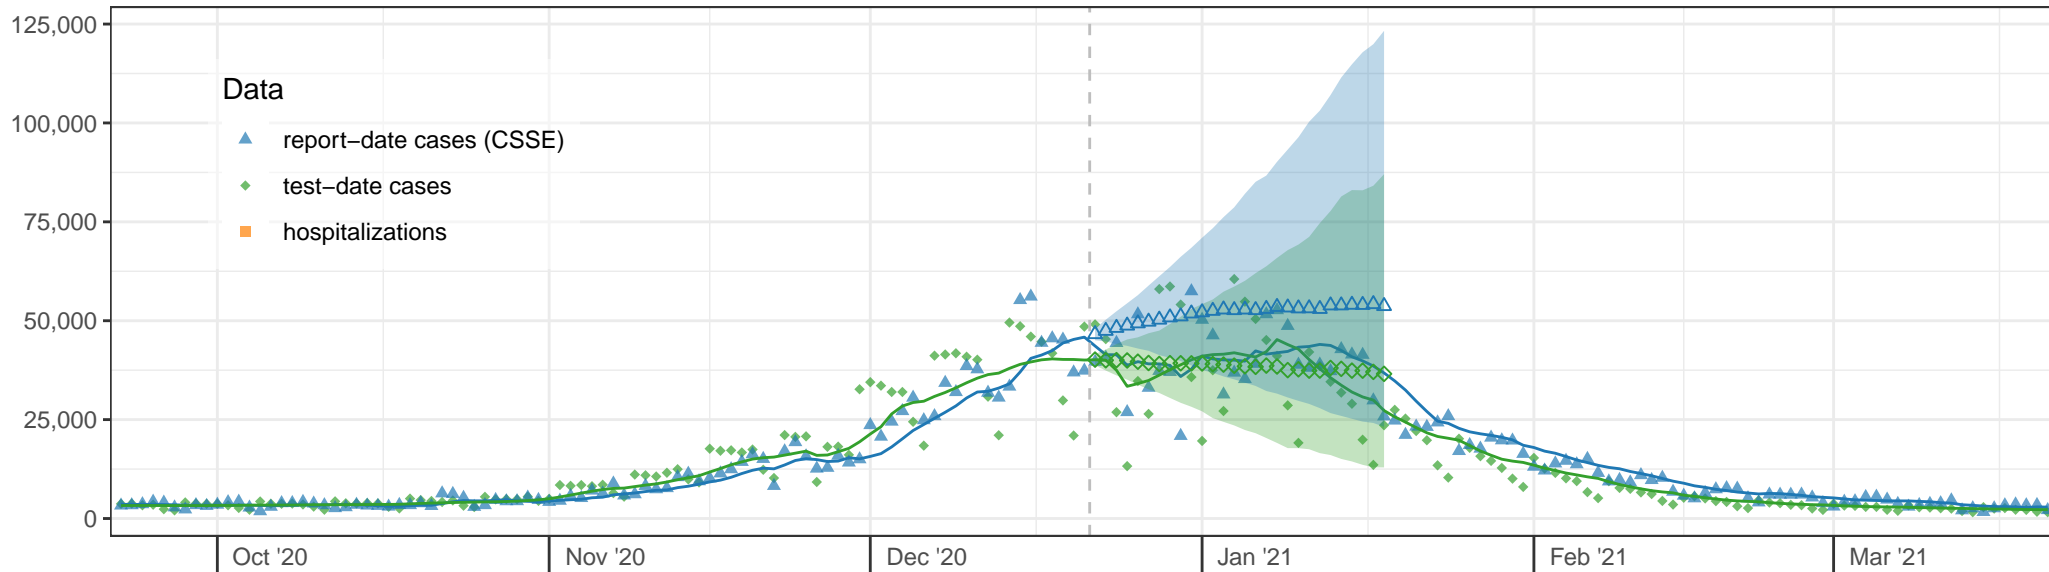

California hospitalization data and forecasts: 2020–12–21

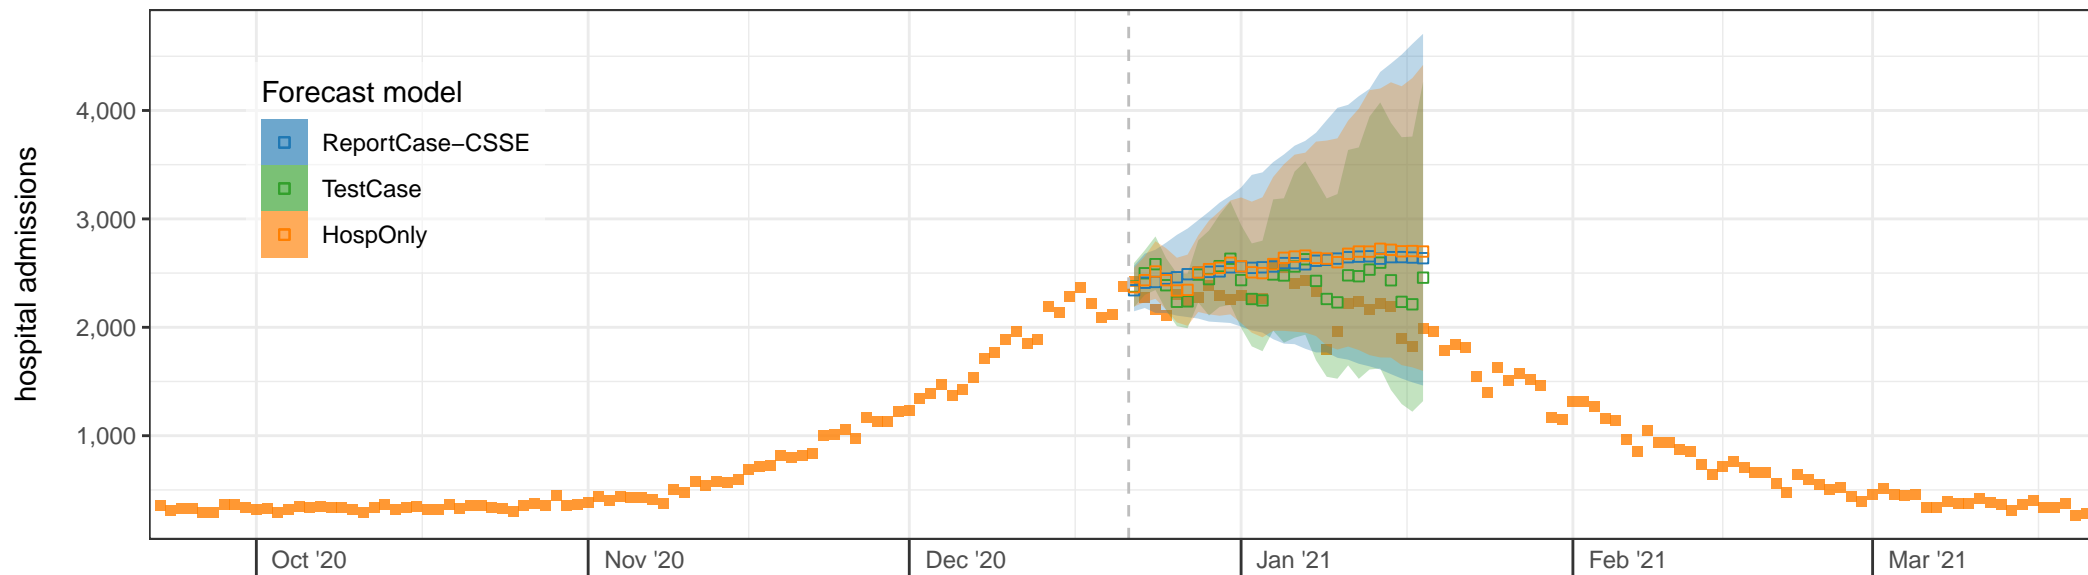

California case data and forecasts: 2020–12–28

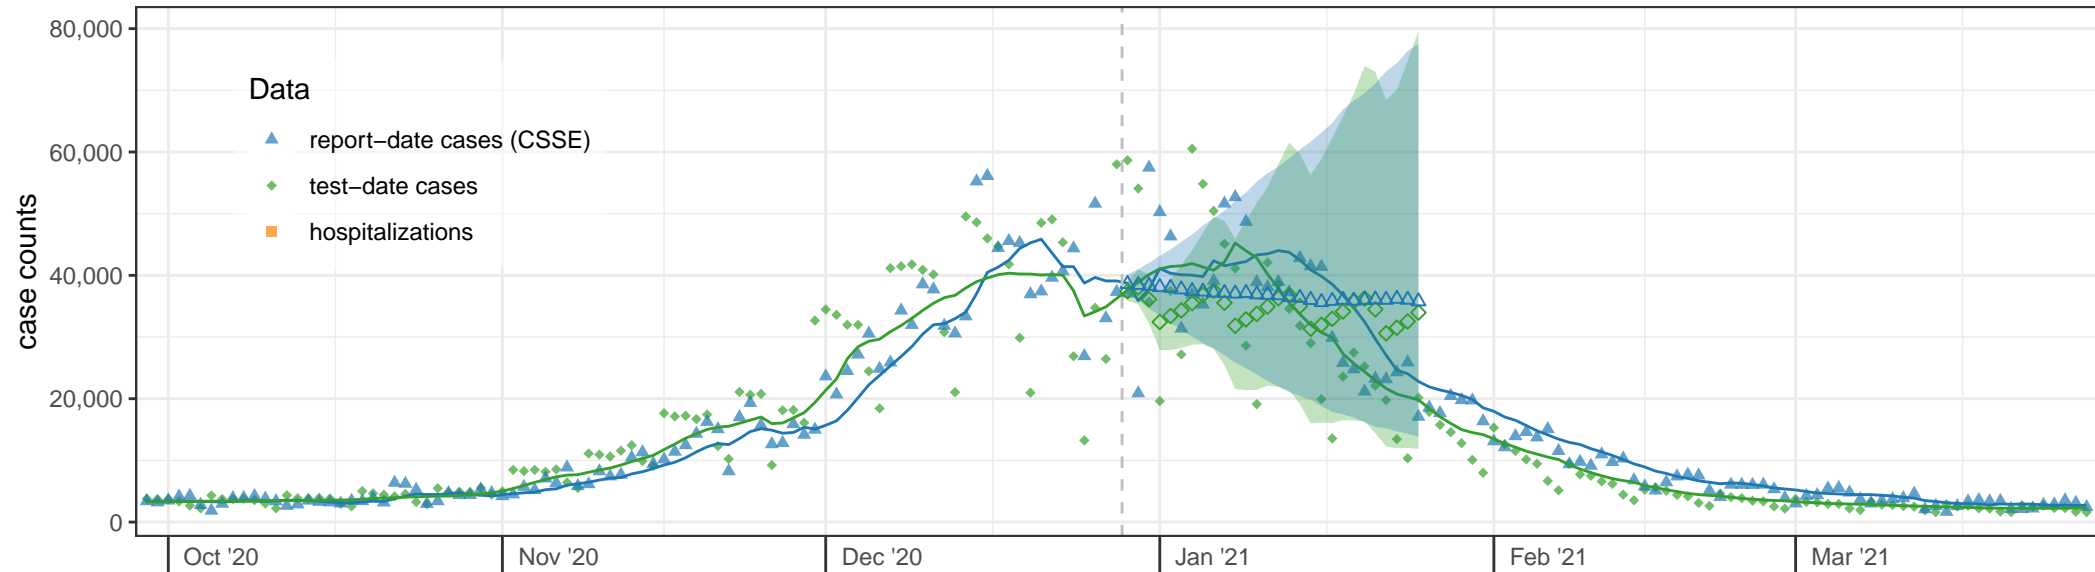

California hospitalization data and forecasts: 2020–12–28

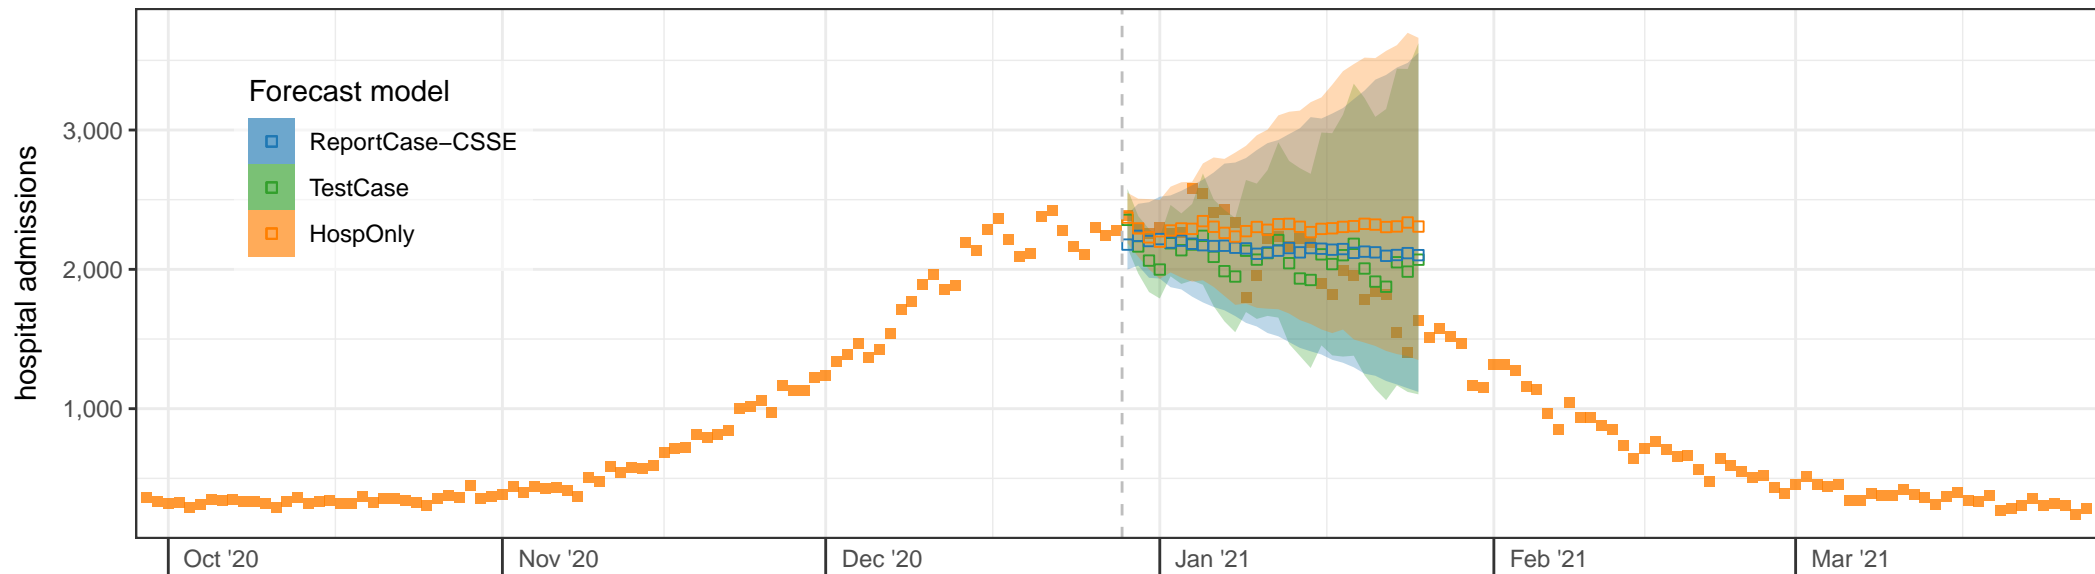

California case data and forecasts: 2021-01-04

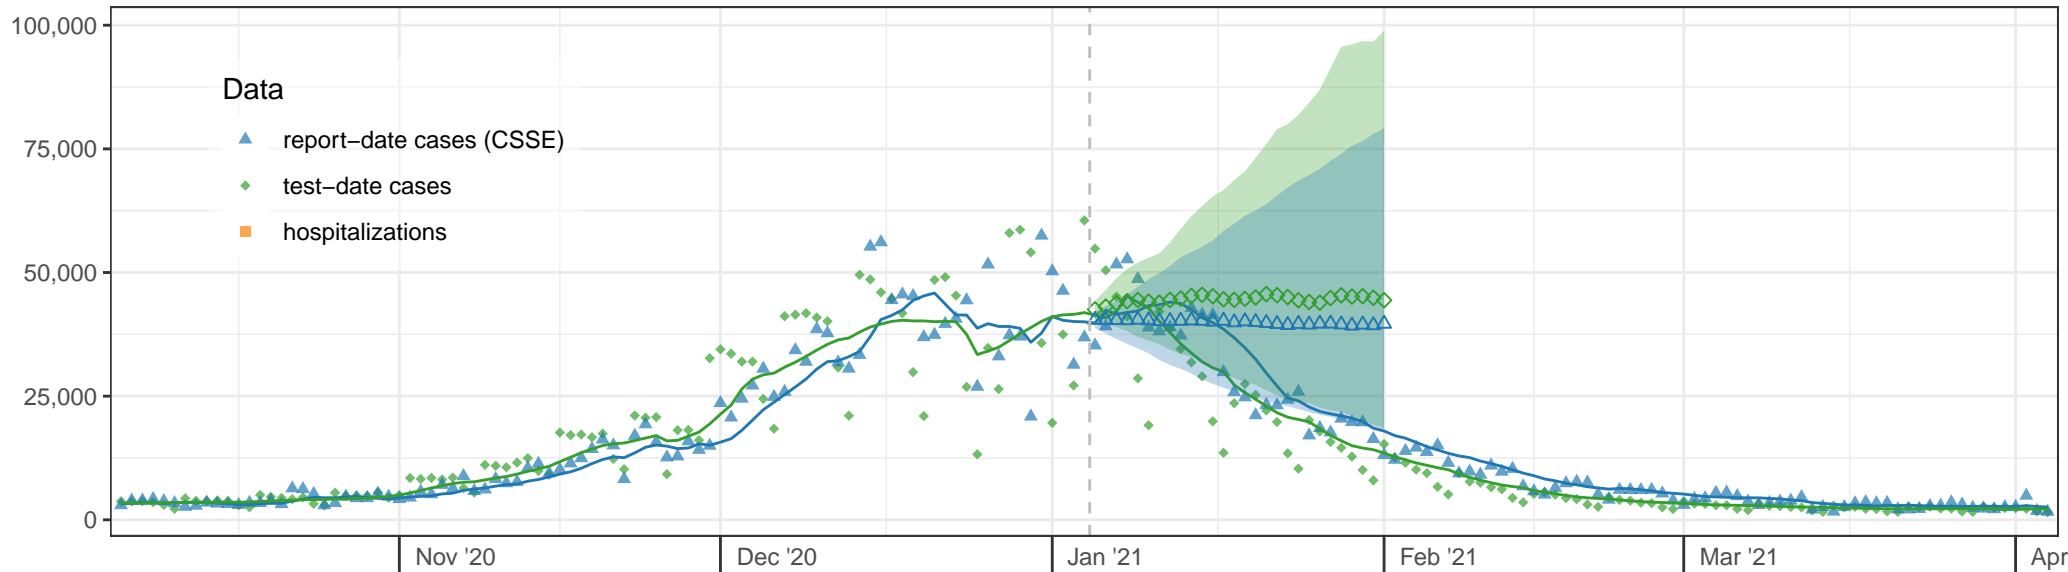

California hospitalization data and forecasts: 2021-01-04

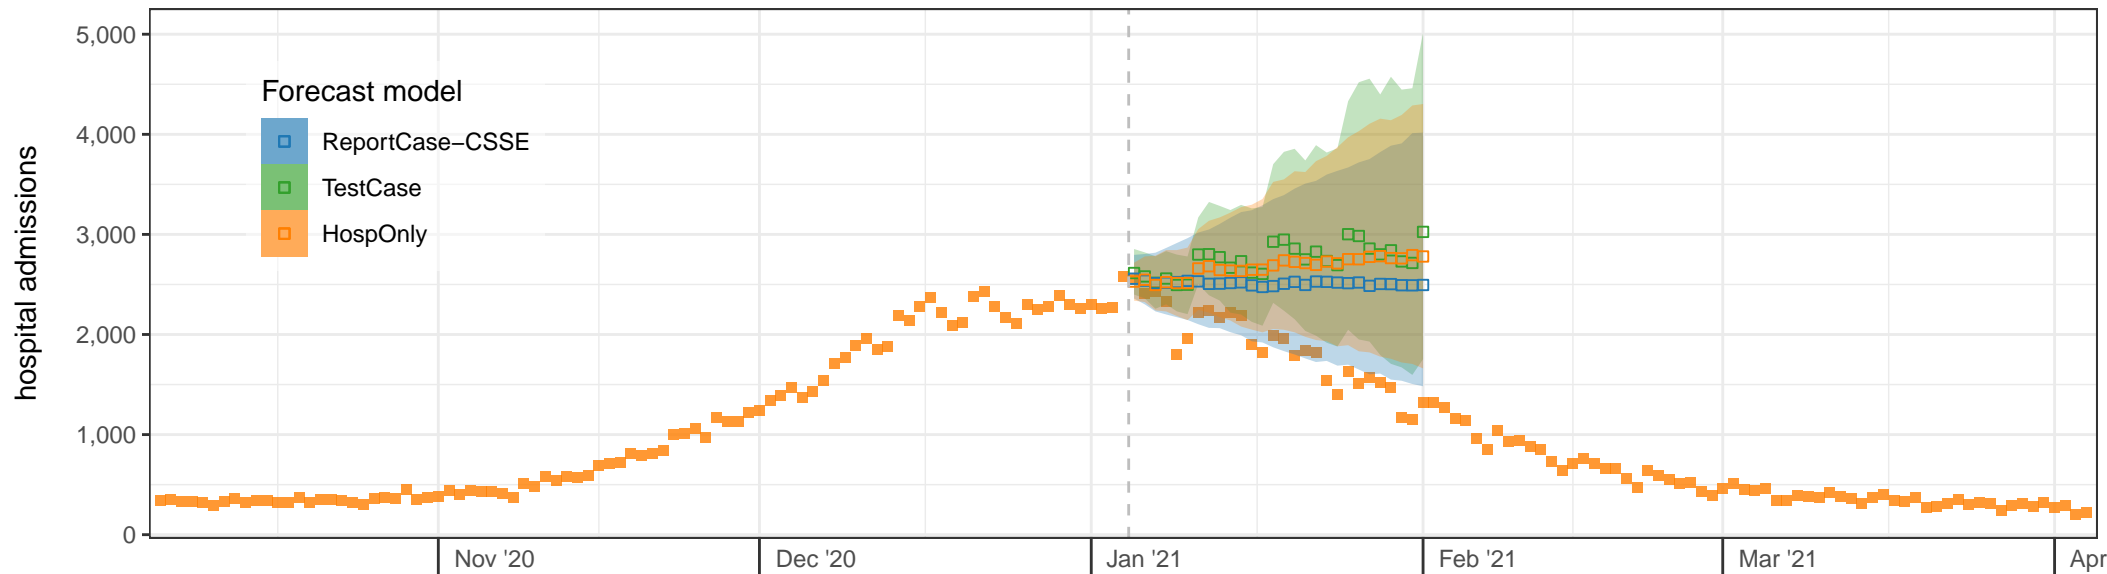

California case data and forecasts: 2021-01-11

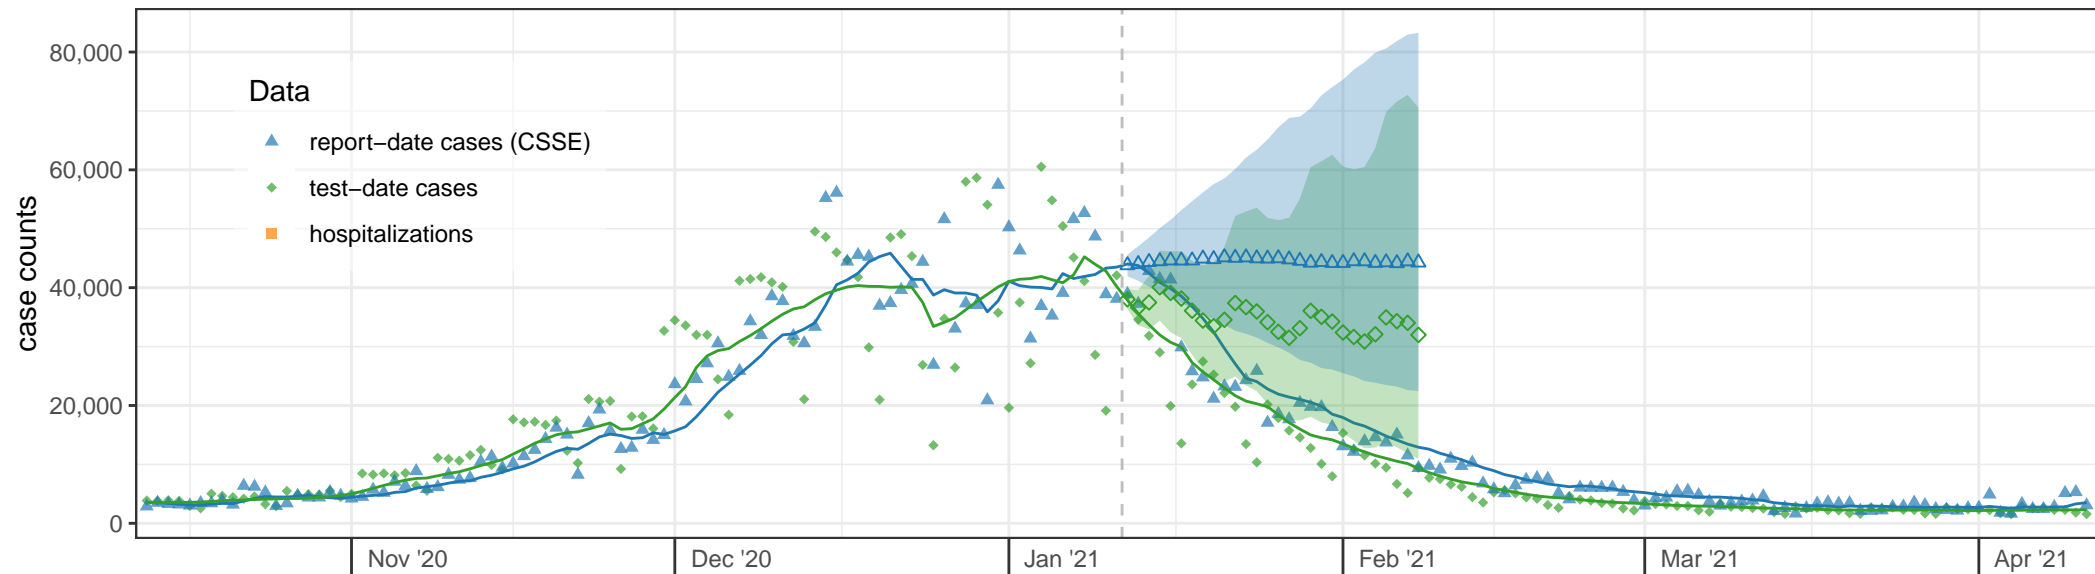

California hospitalization data and forecasts: 2021-01-11

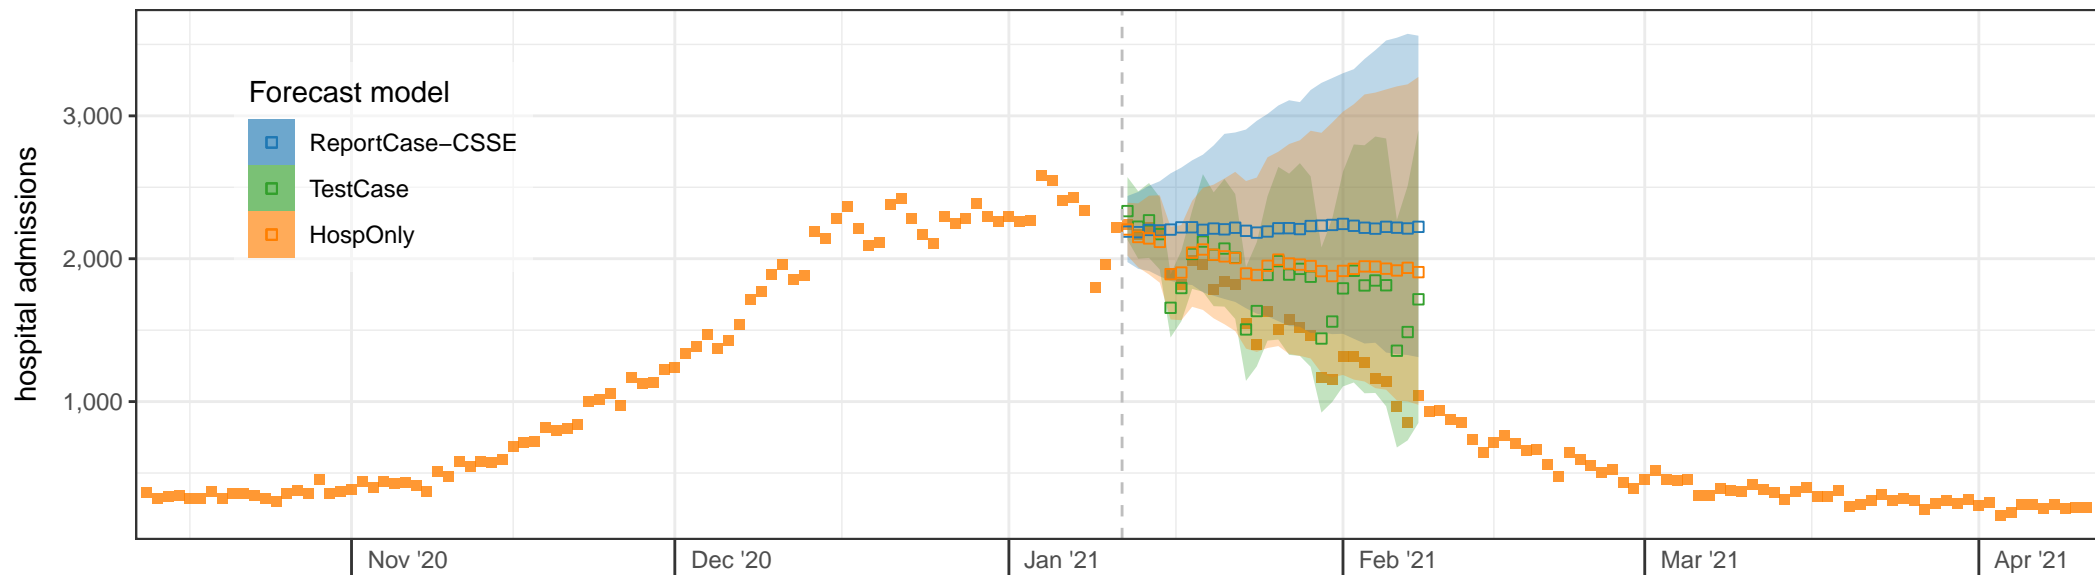

California case data and forecasts: 2021-01-18

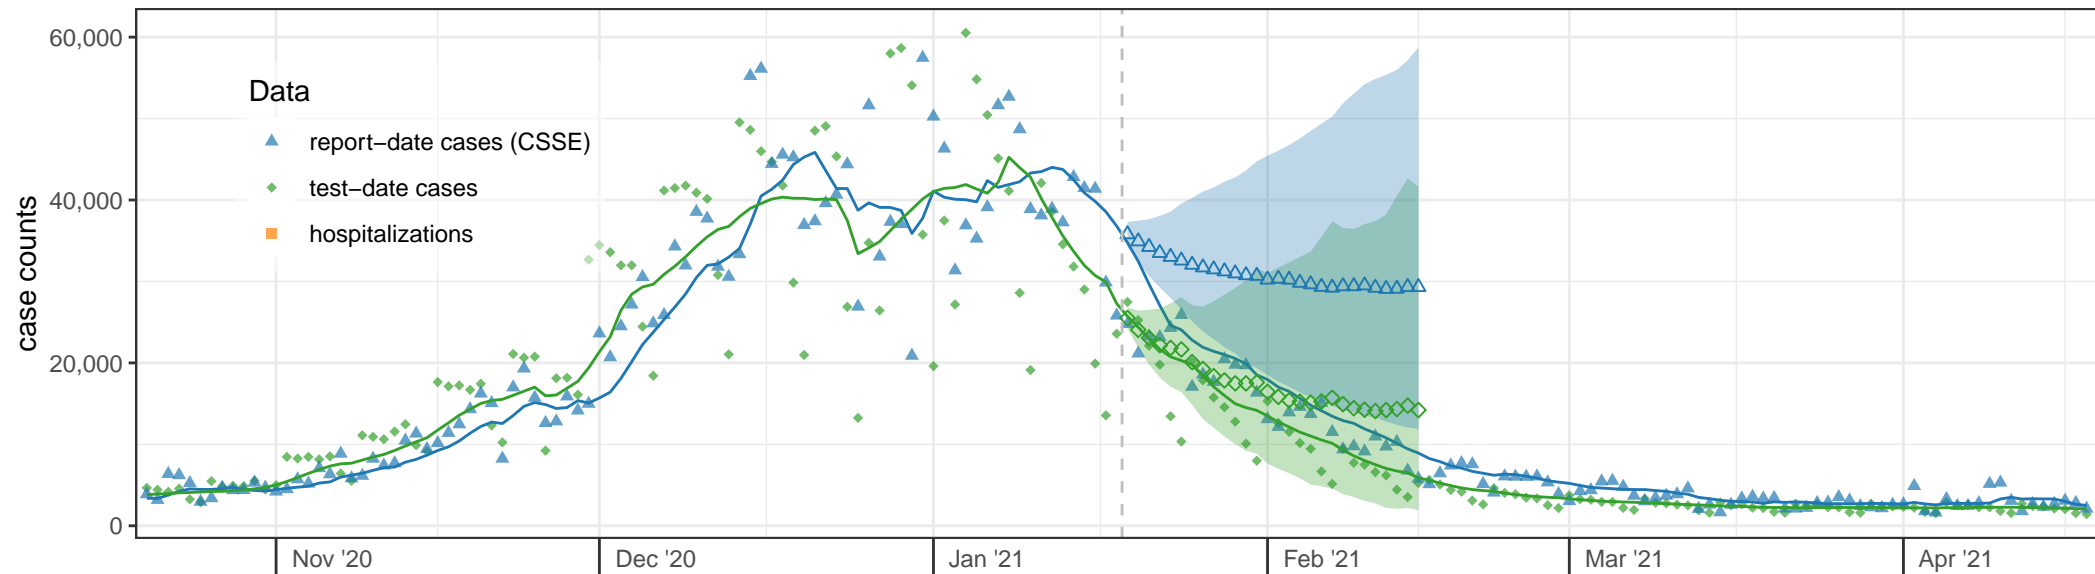

California hospitalization data and forecasts: 2021-01-18

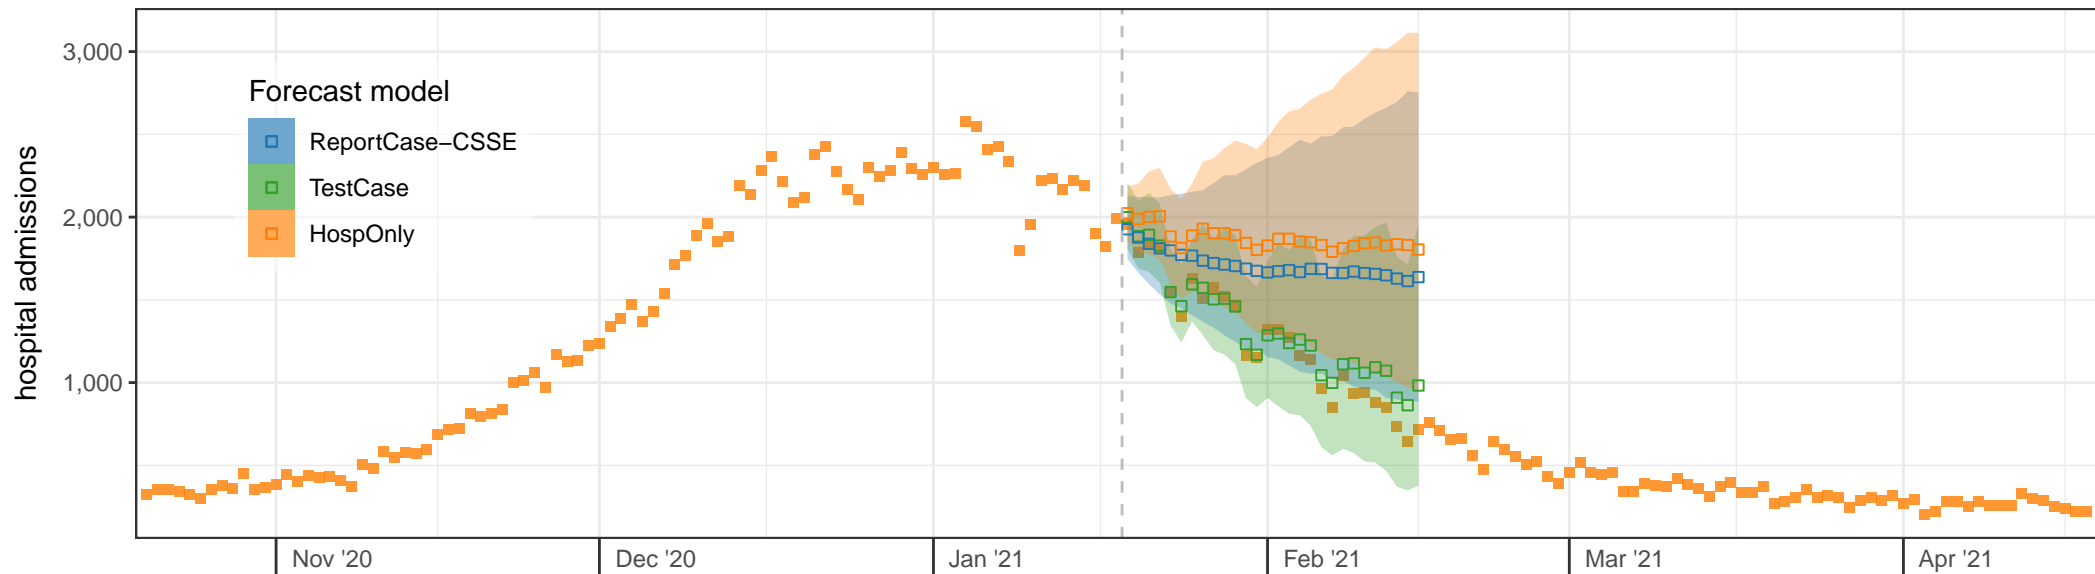

California case data and forecasts: 2021-01-25

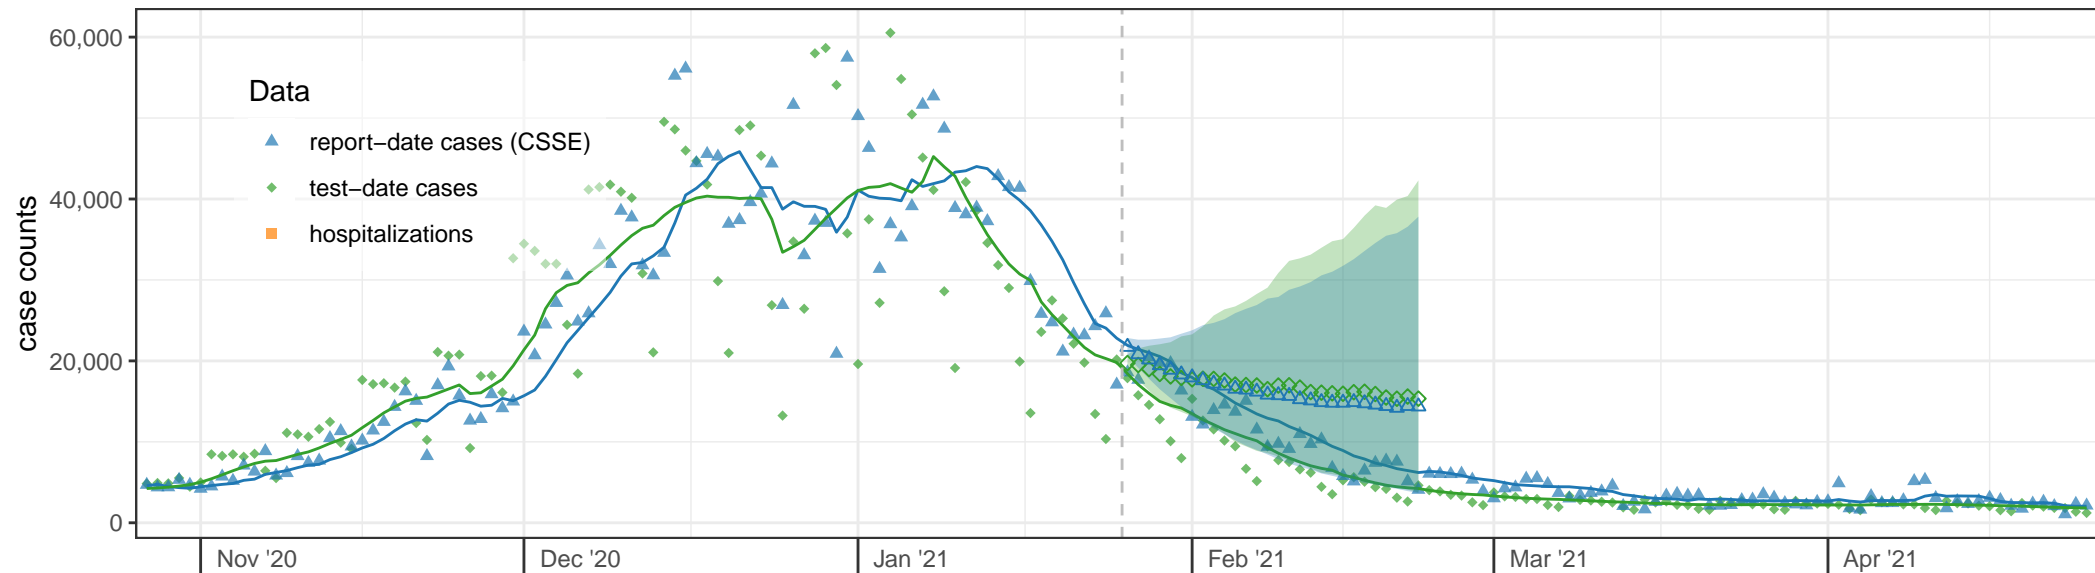

California hospitalization data and forecasts: 2021-01-25

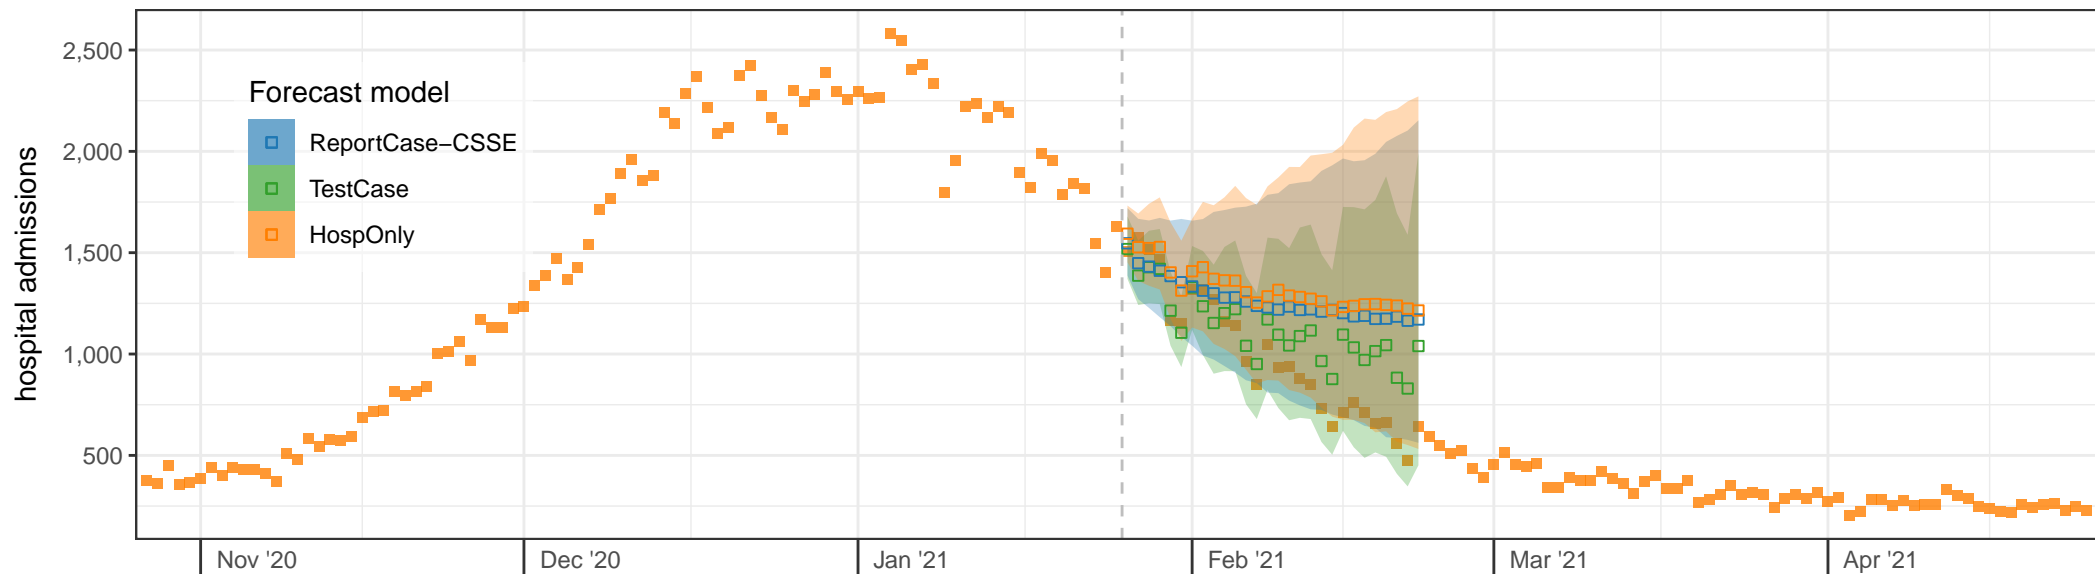



California case data and forecasts: 2021-02-01

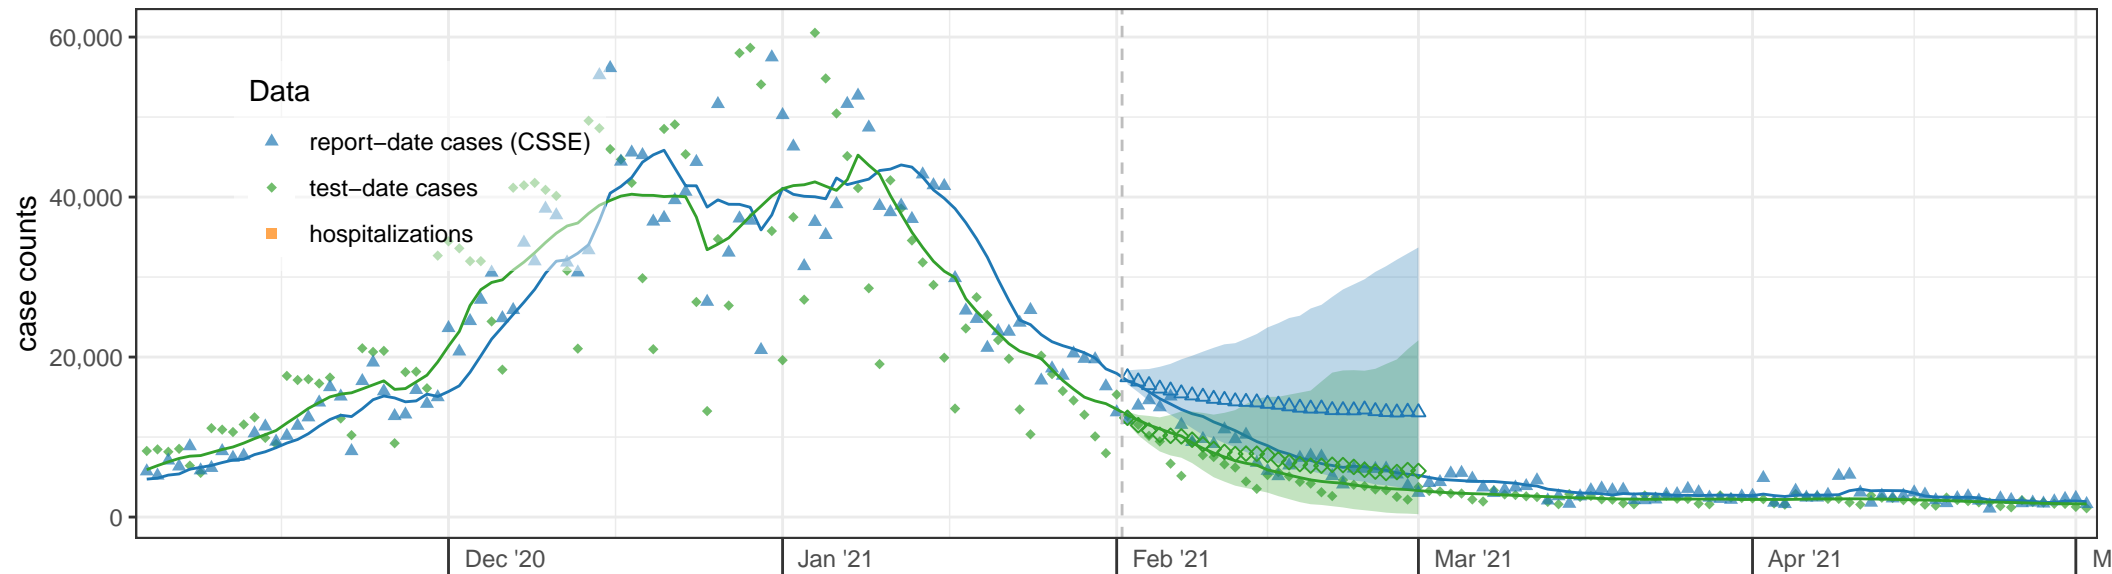

California hospitalization data and forecasts: 2021-02-01

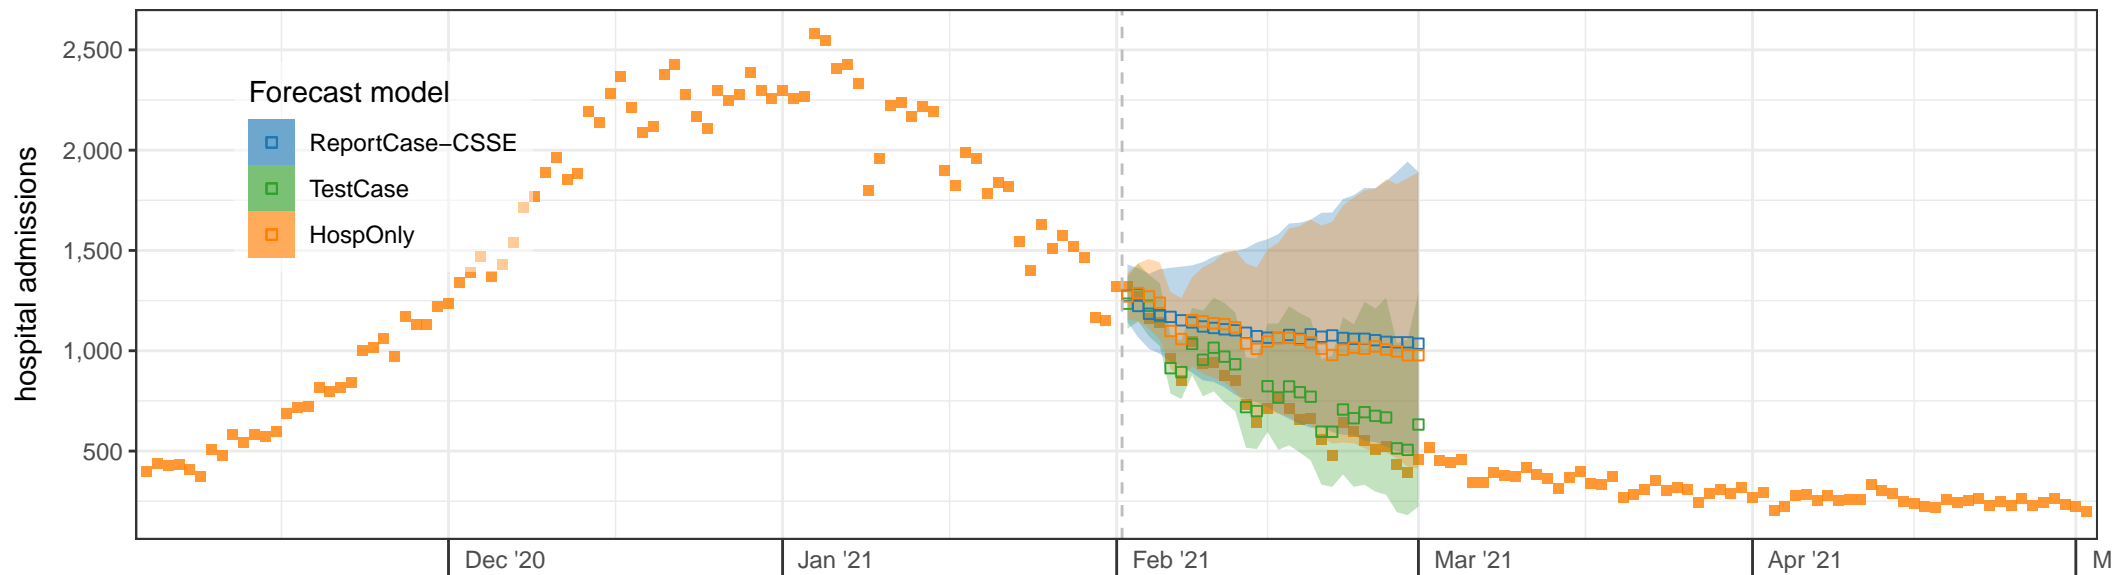

California case data and forecasts: 2021-02-08

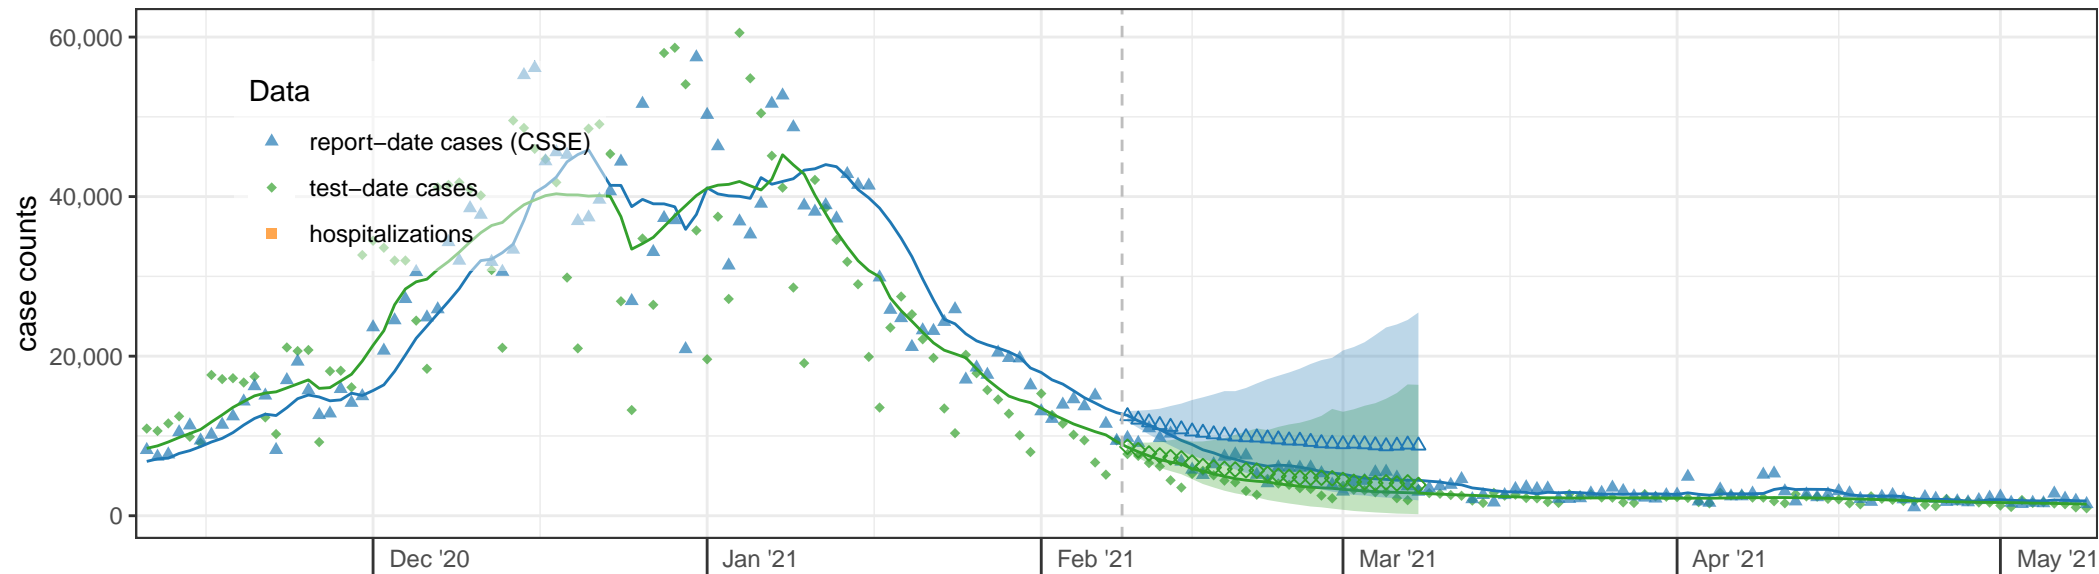

California hospitalization data and forecasts: 2021-02-08

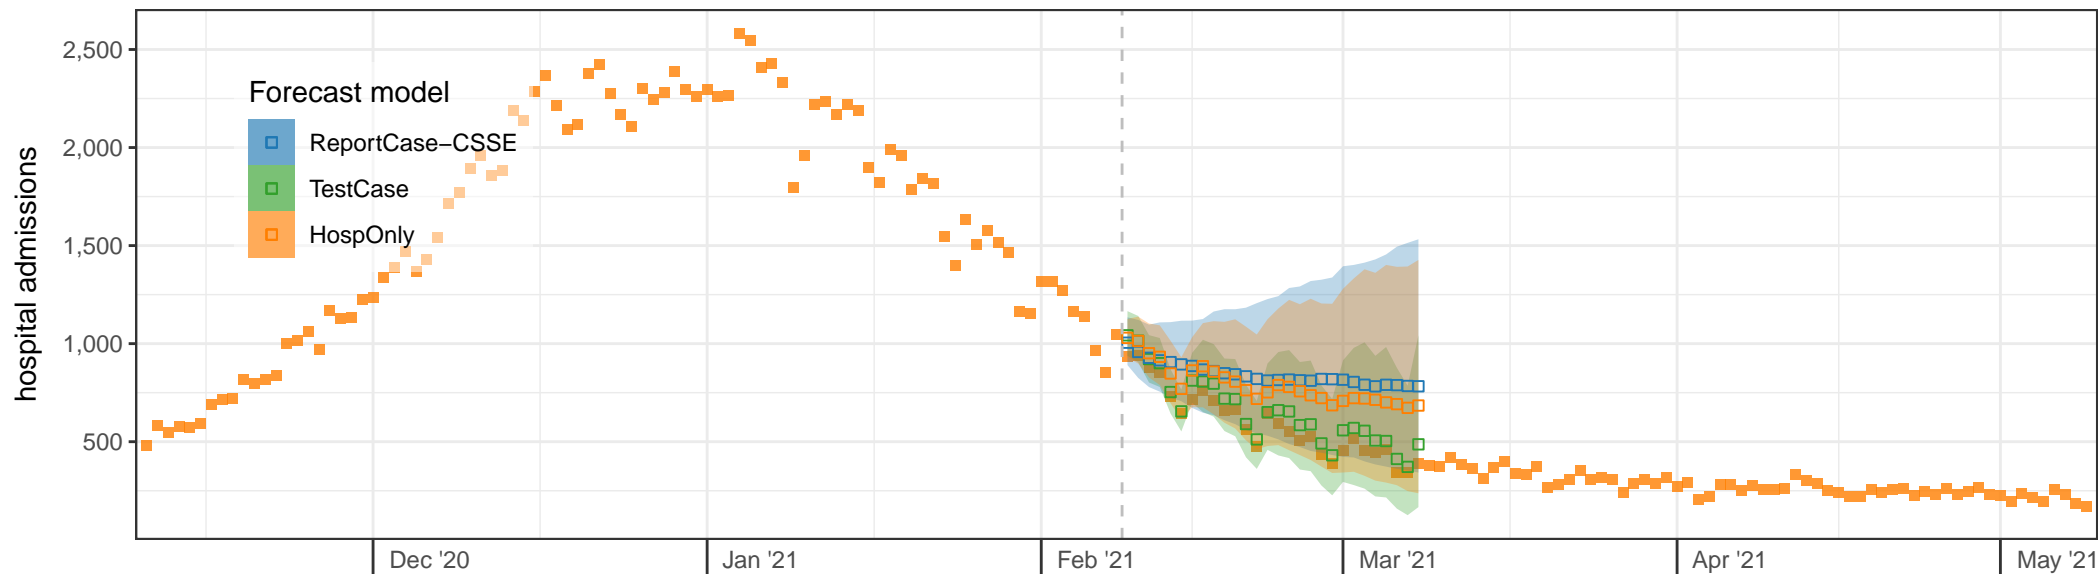

California case data and forecasts: 2021-02-15

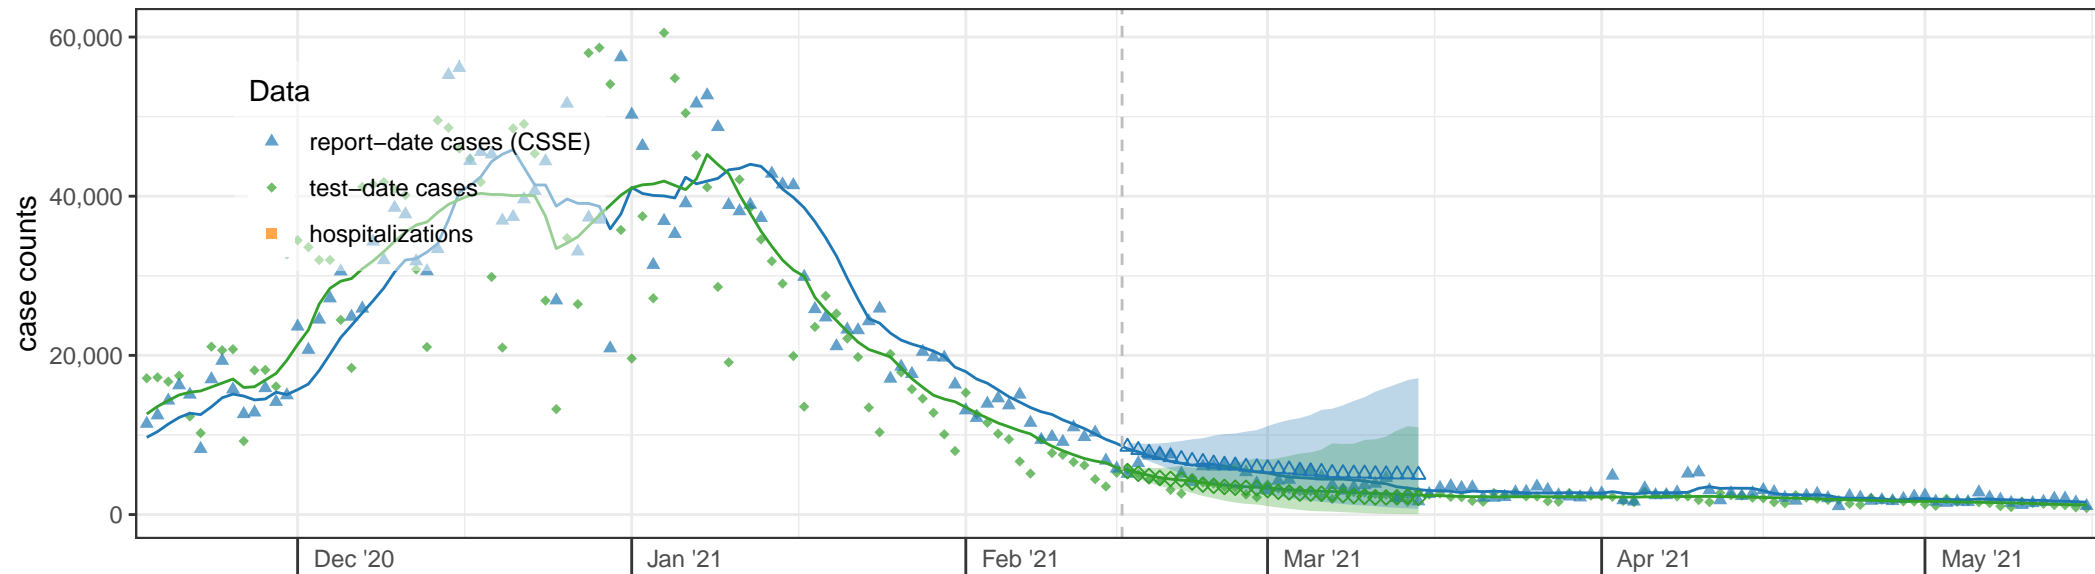

California hospitalization data and forecasts: 2021-02-15

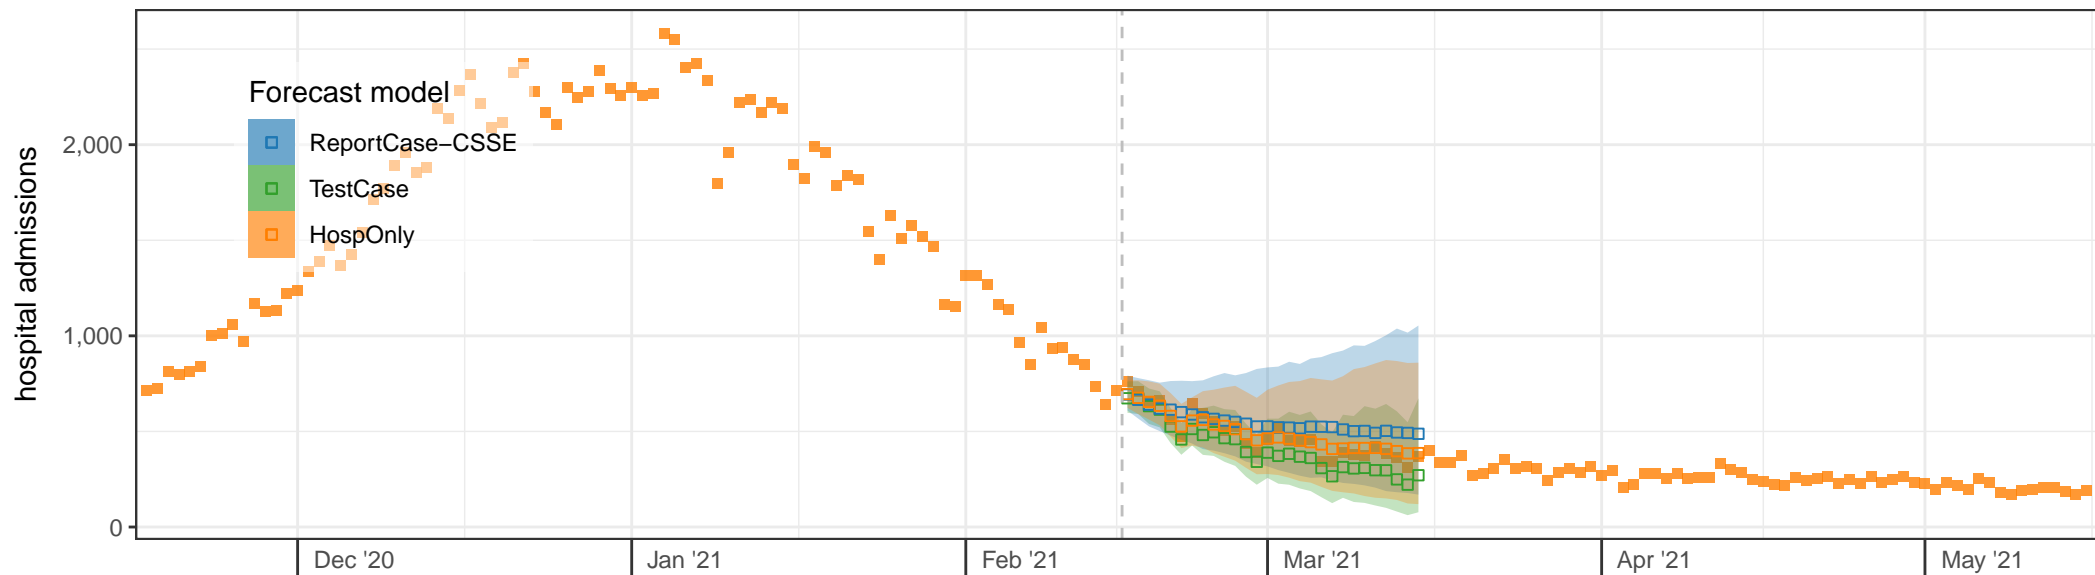

California case data and forecasts: 2021-02-22

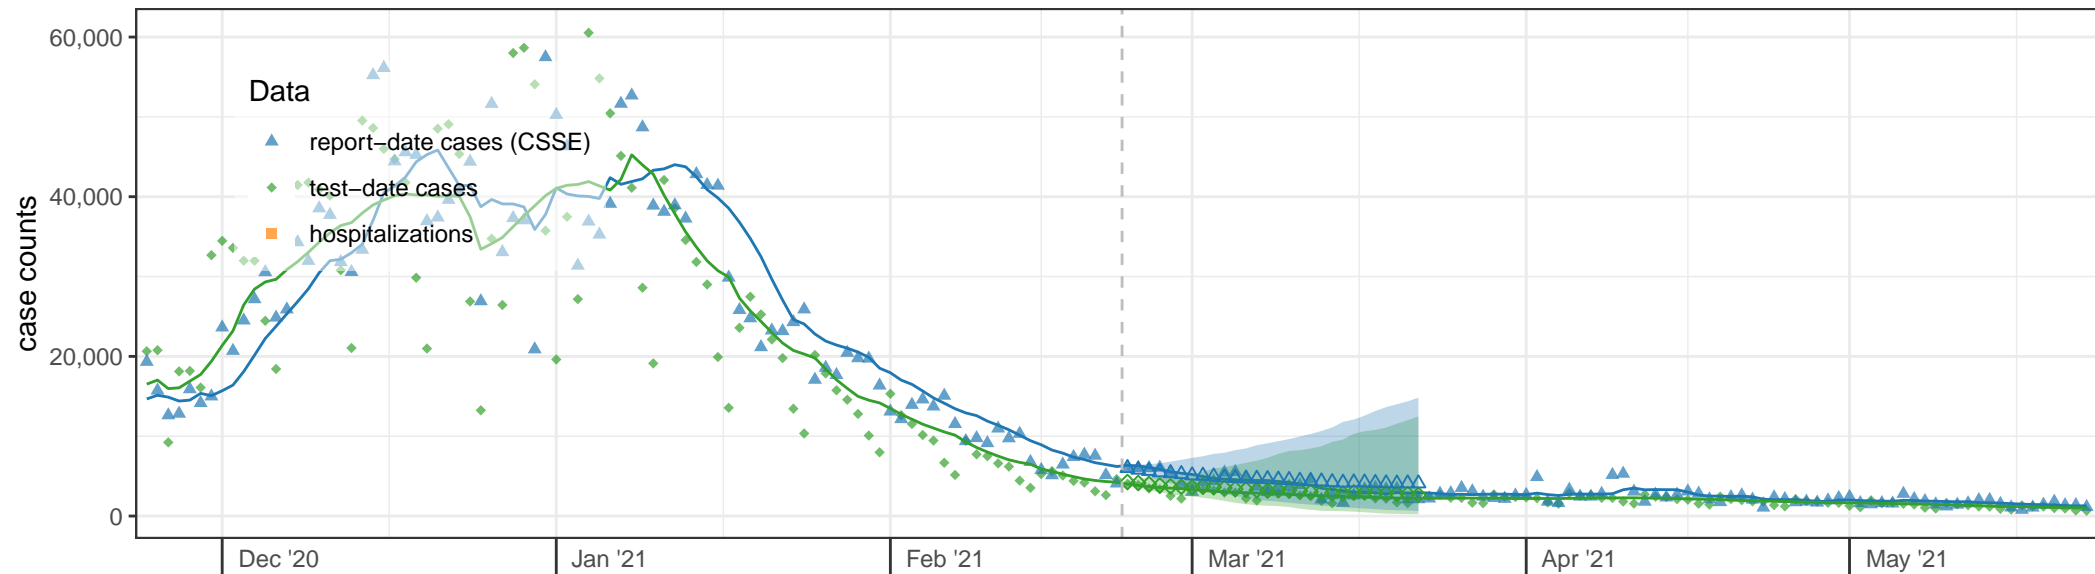

California hospitalization data and forecasts: 2021-02-22

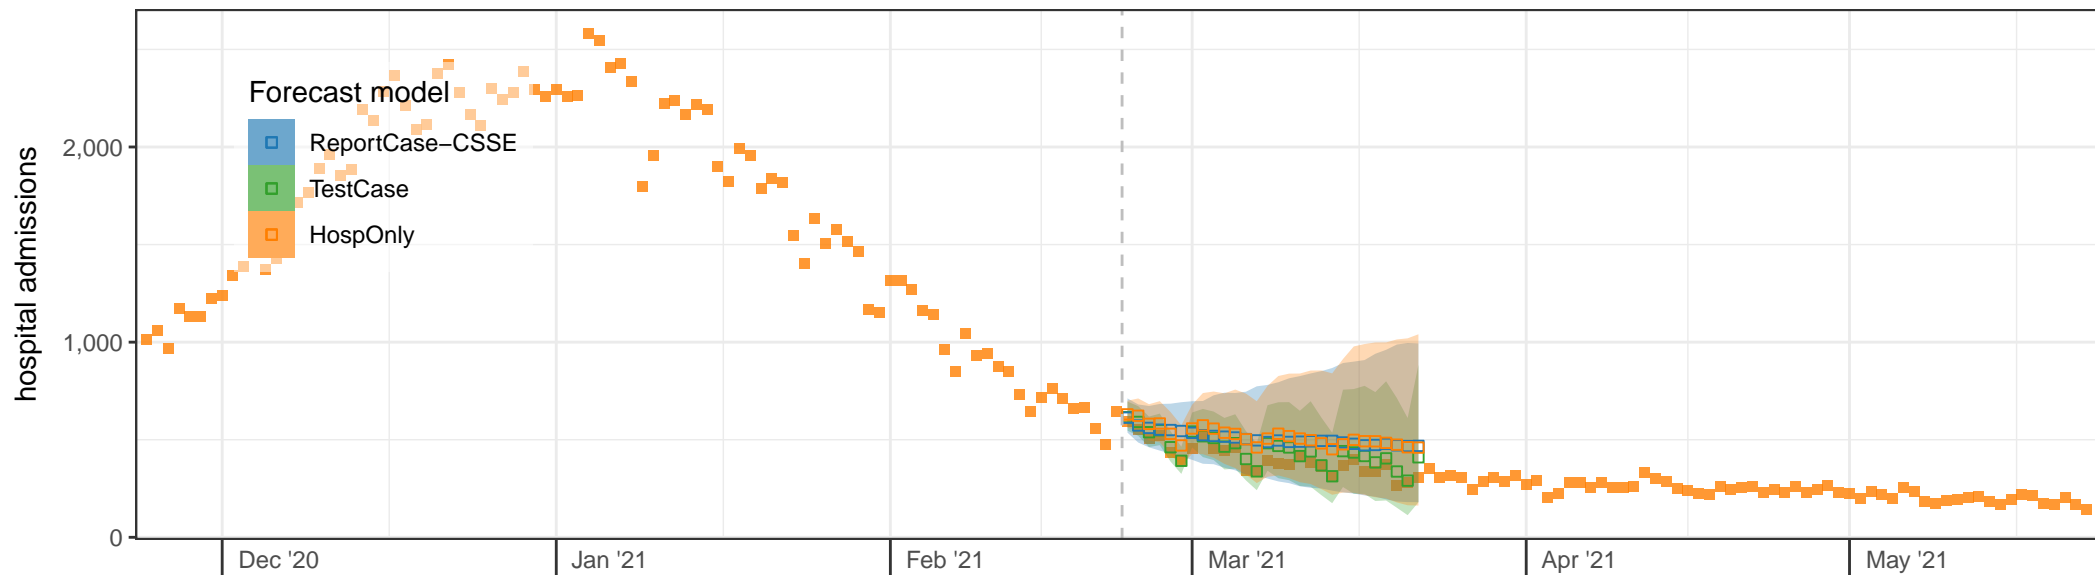

California case data and forecasts: 2021-03-01

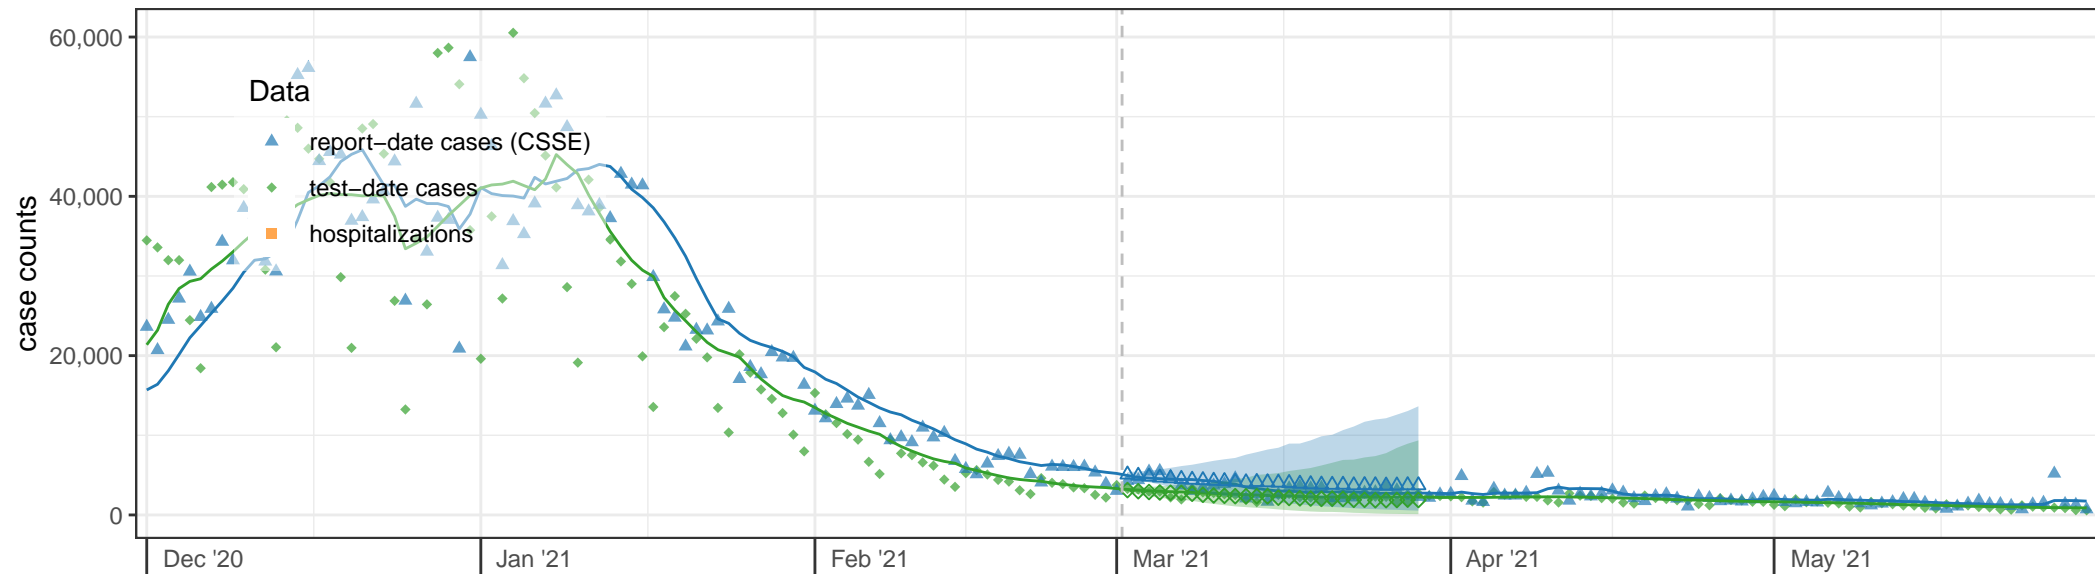

California hospitalization data and forecasts: 2021-03-01

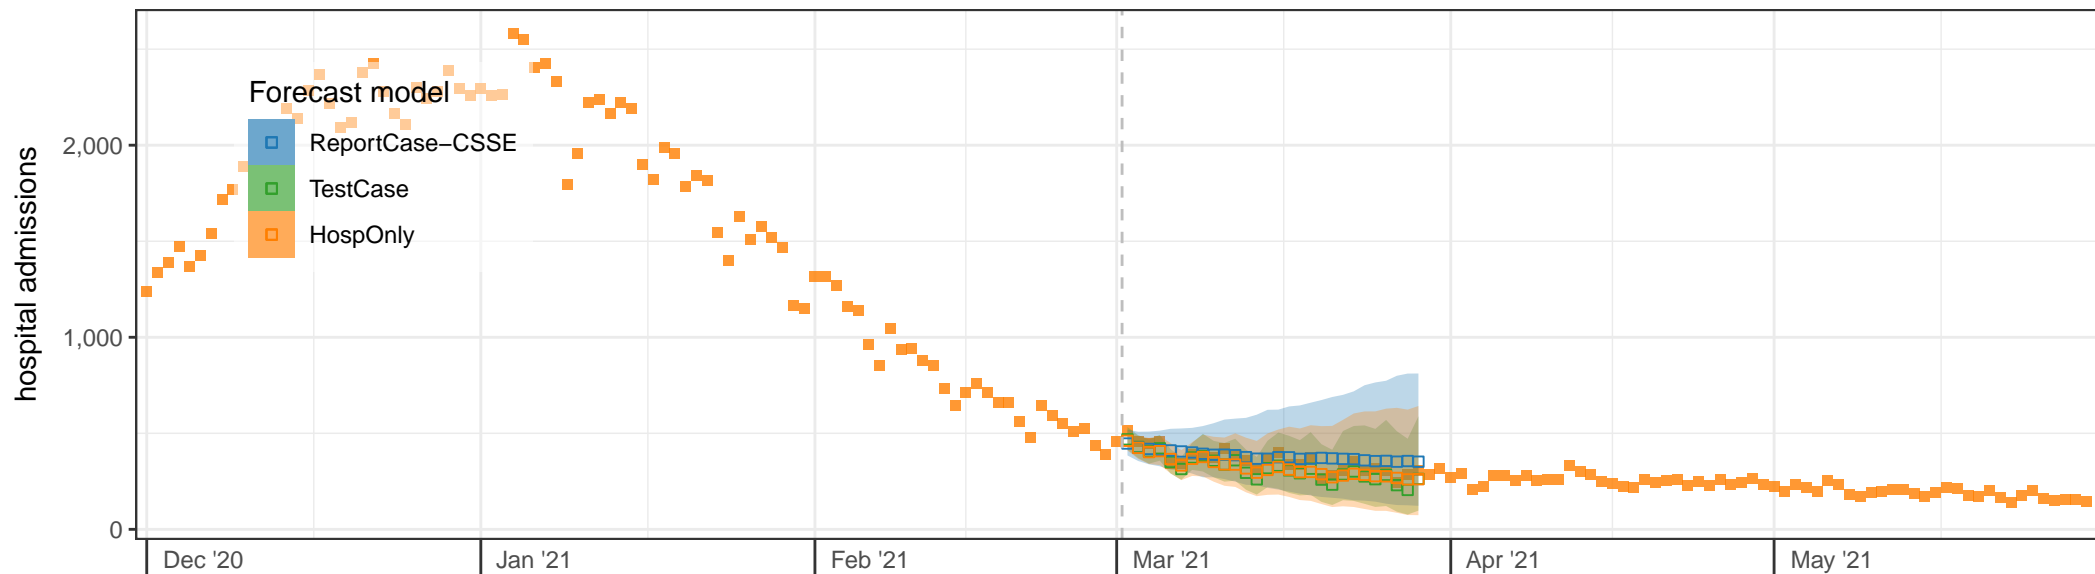

California case data and forecasts: 2021-03-08

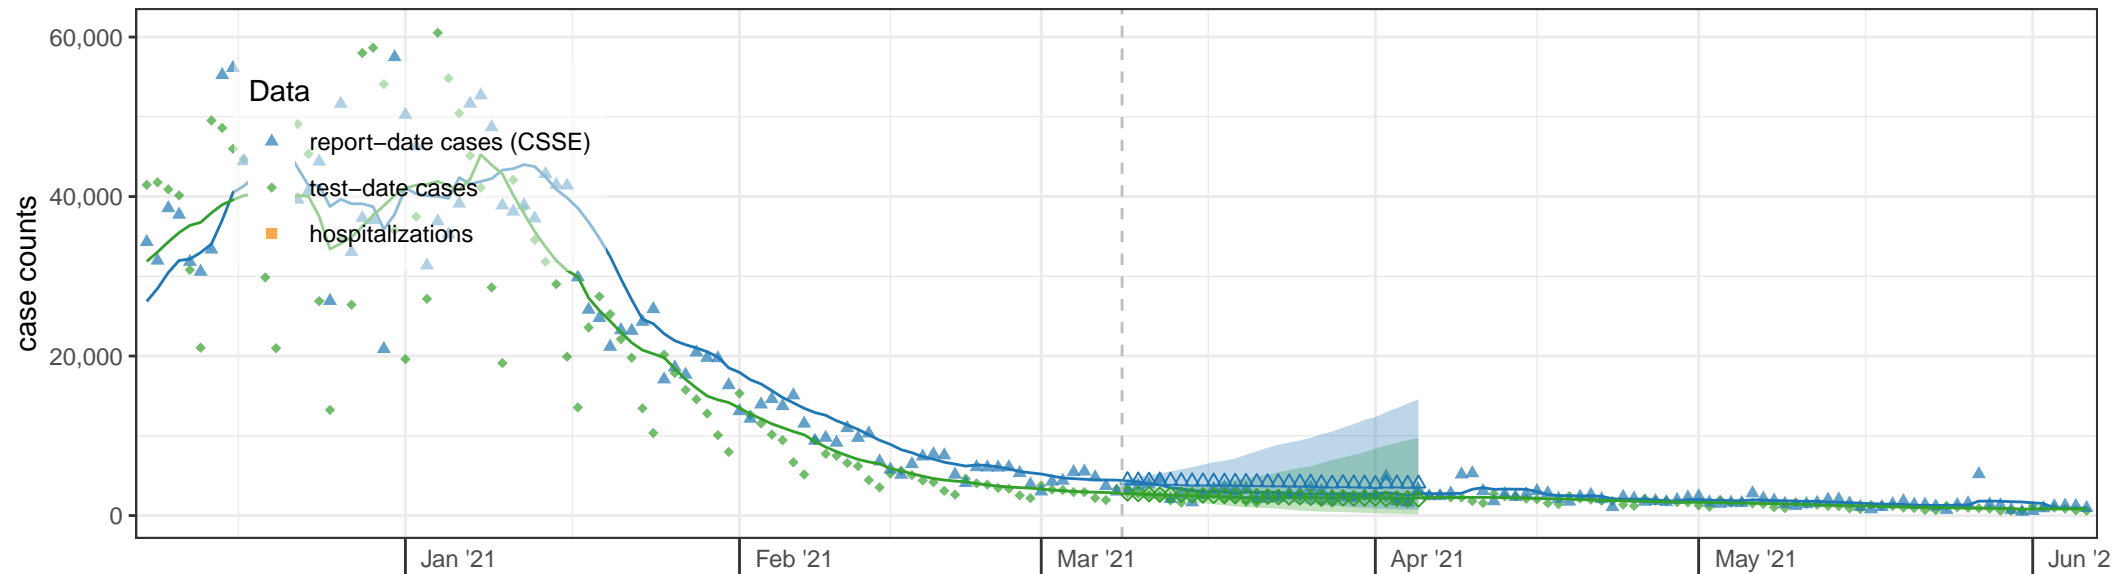

California hospitalization data and forecasts: 2021-03-08

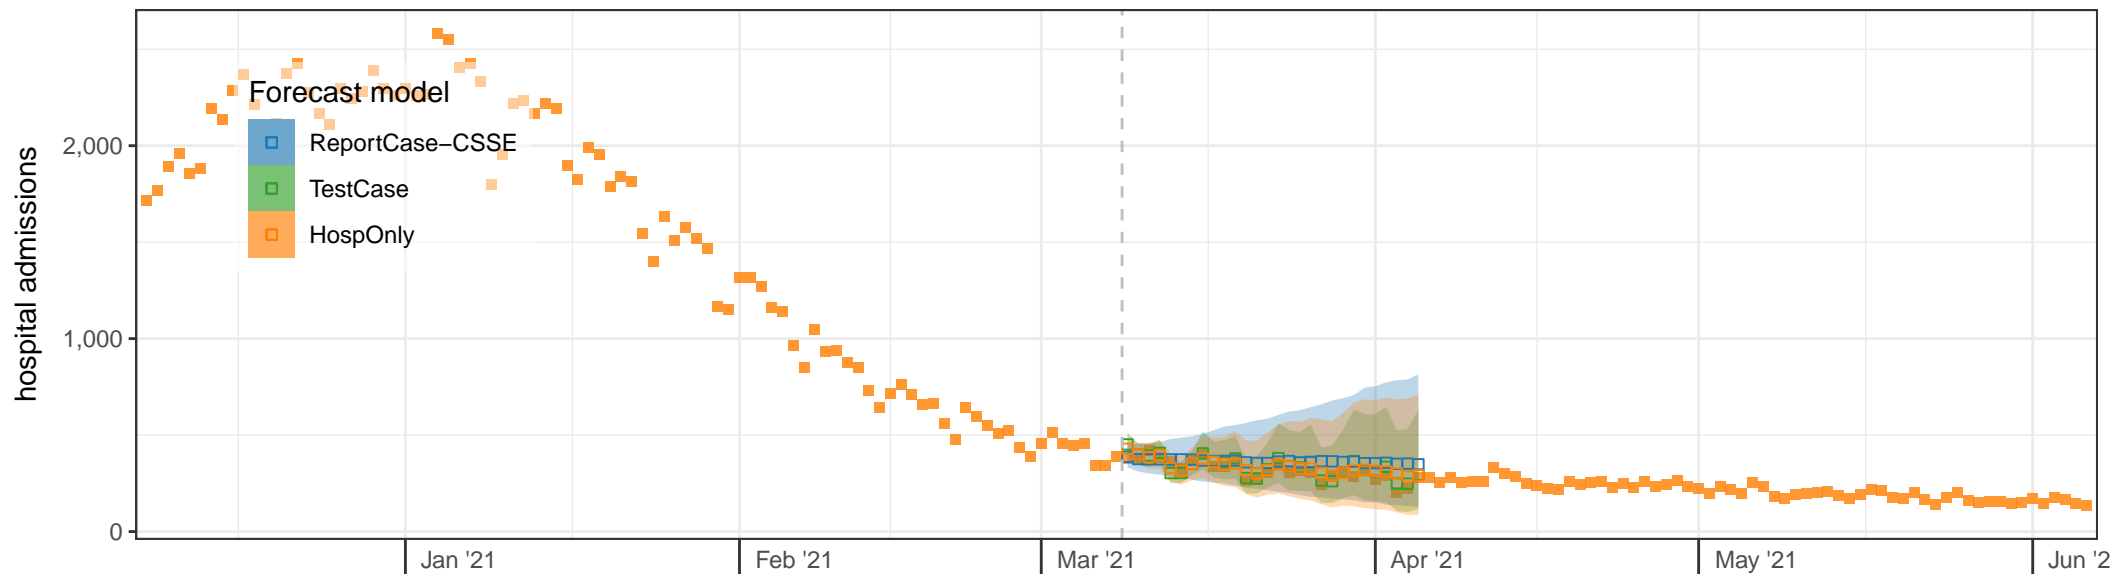

California case data and forecasts: 2021-03-15

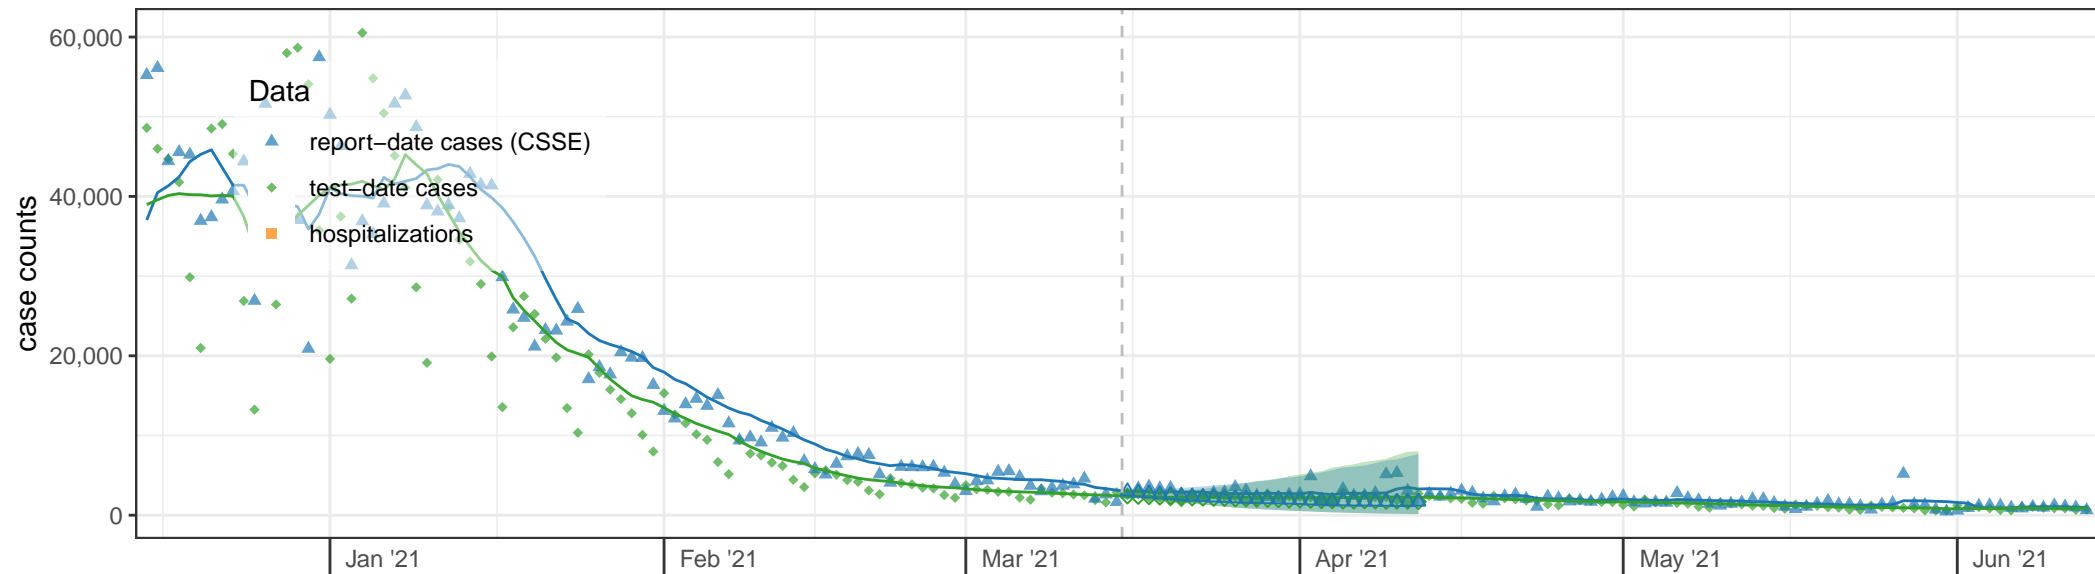

California hospitalization data and forecasts: 2021-03-15

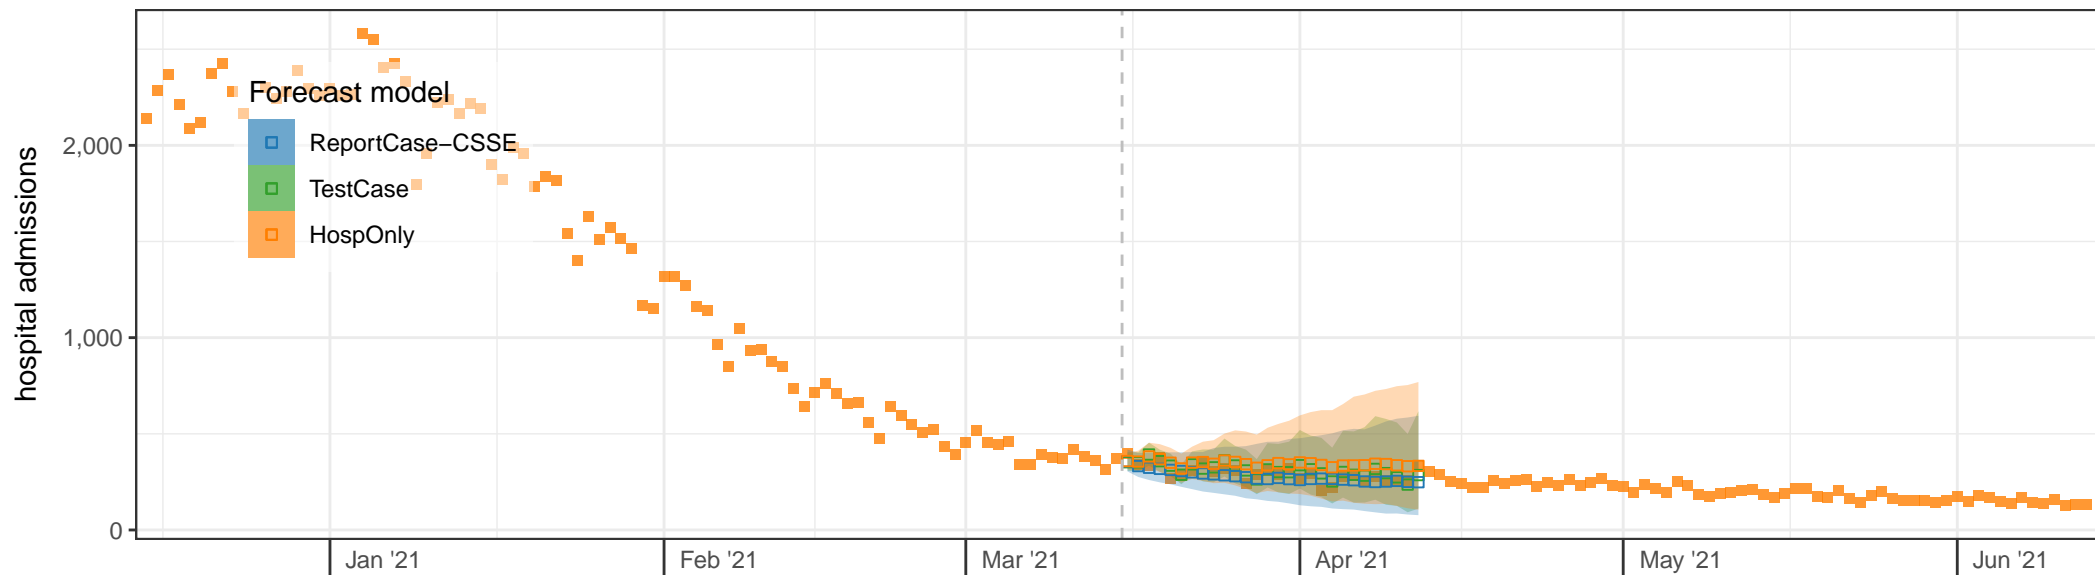

California case data and forecasts: 2021-03-22

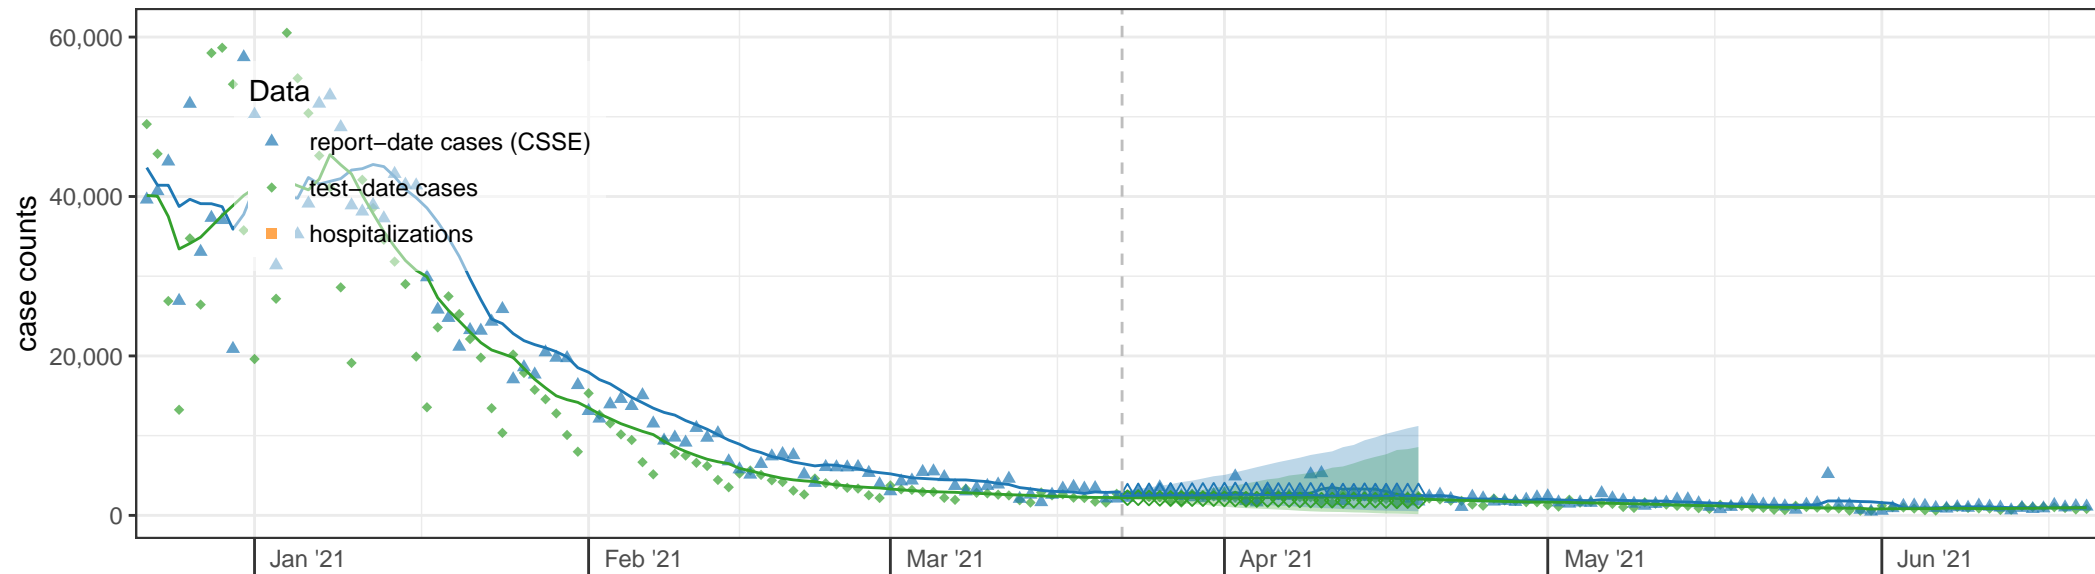

California hospitalization data and forecasts: 2021-03-22

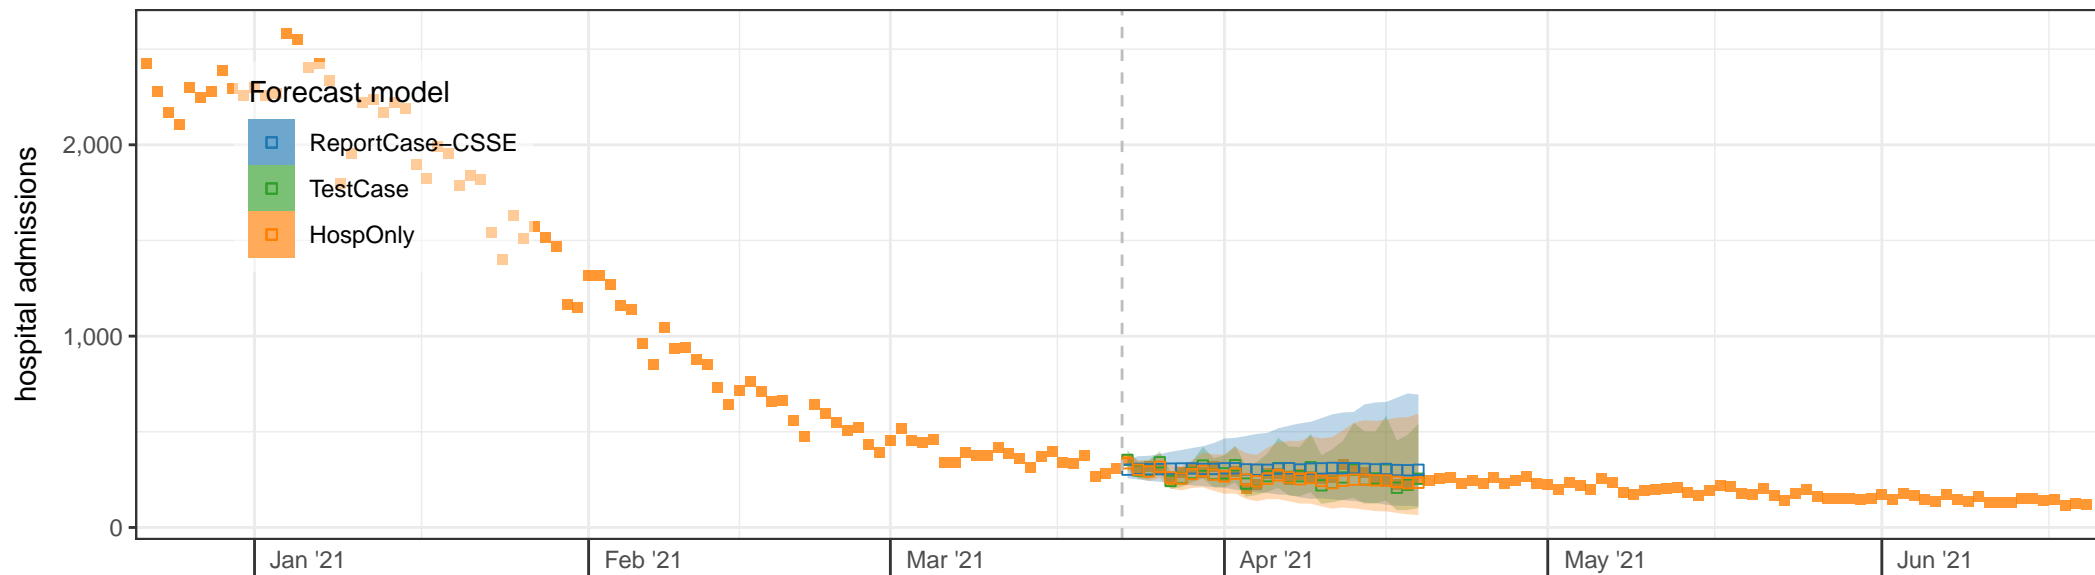



California case data and forecasts: 2021-03-29

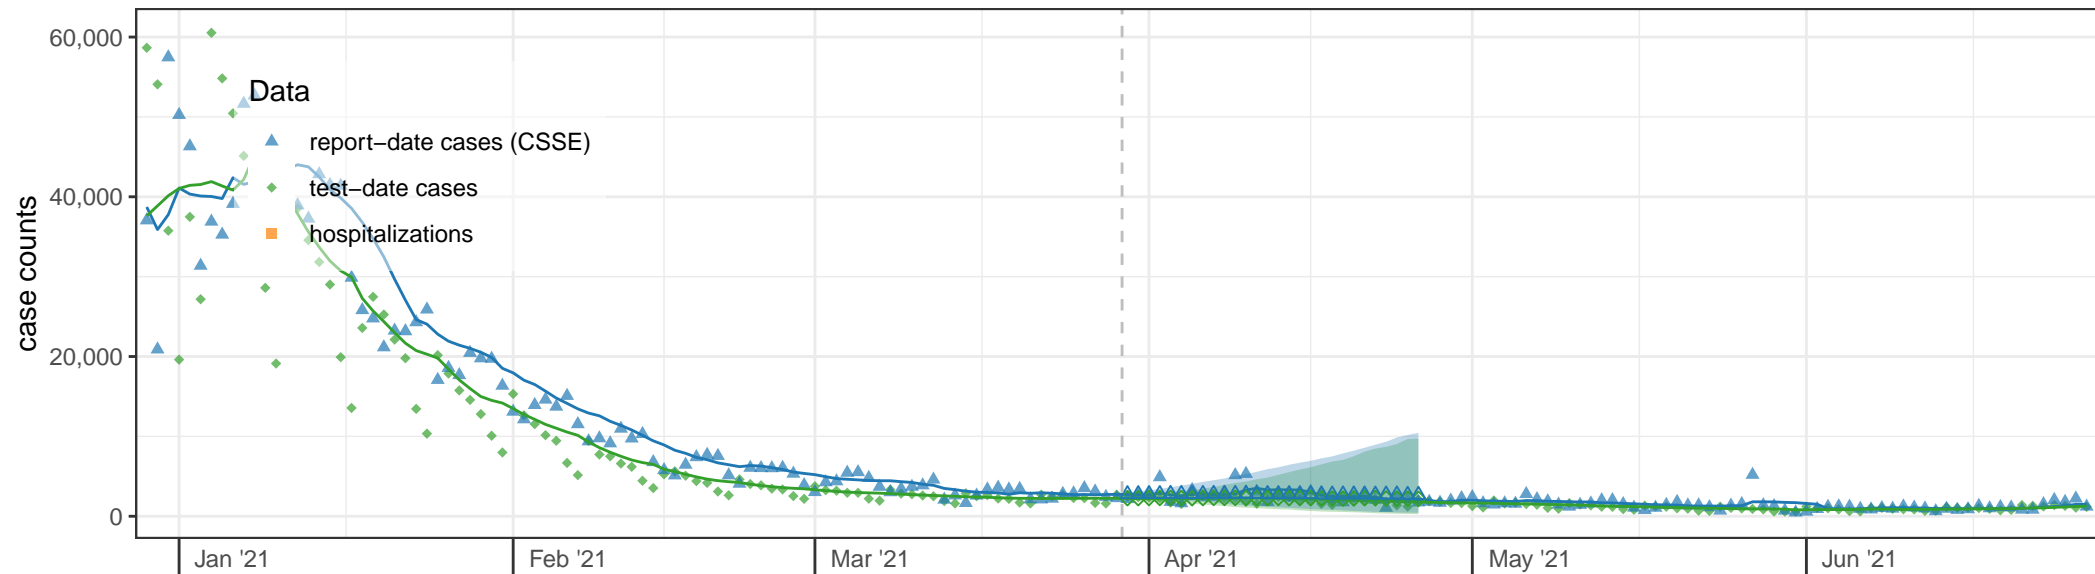

California hospitalization data and forecasts: 2021-03-29

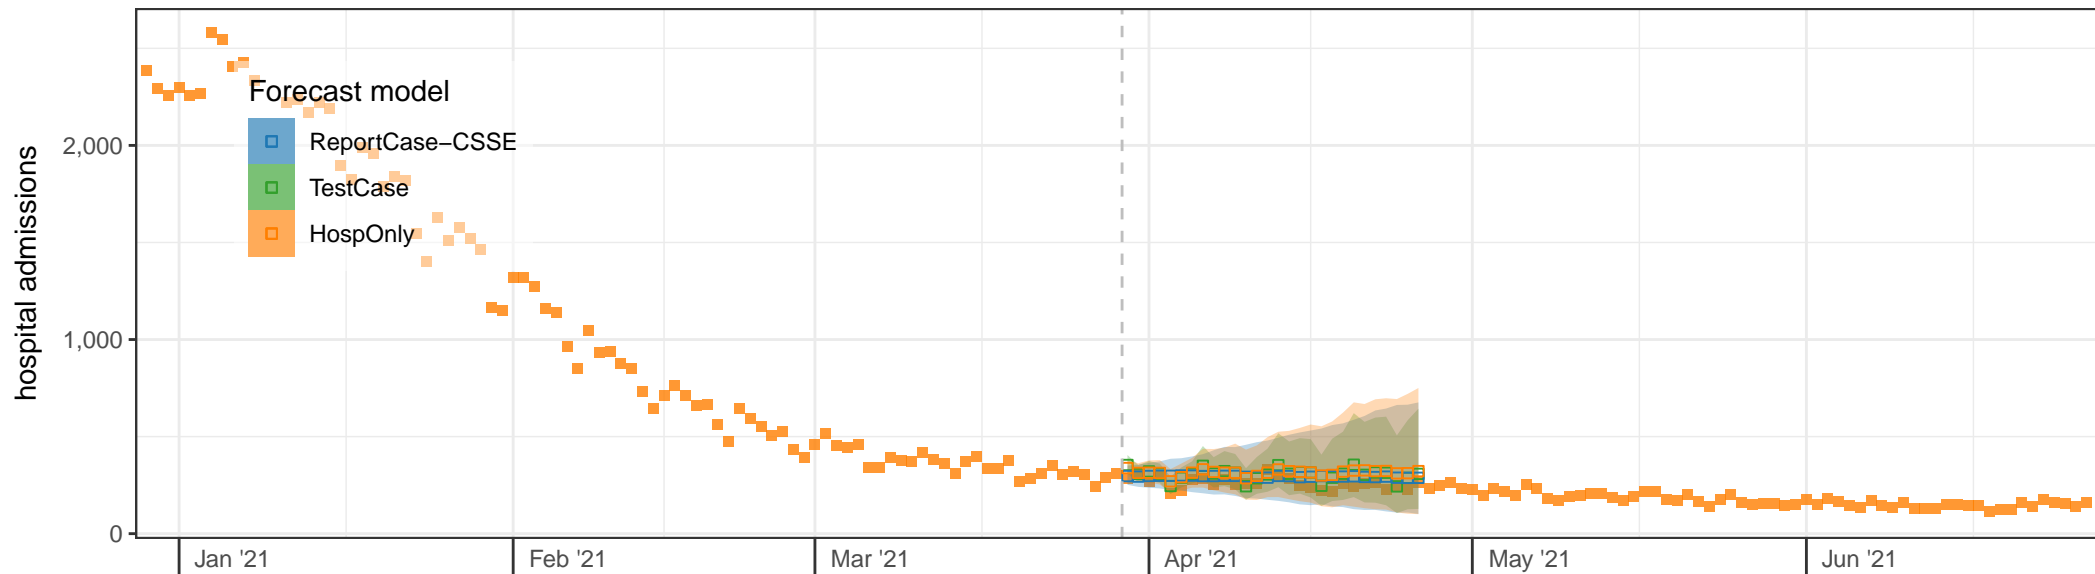

California case data and forecasts: 2021-04-05

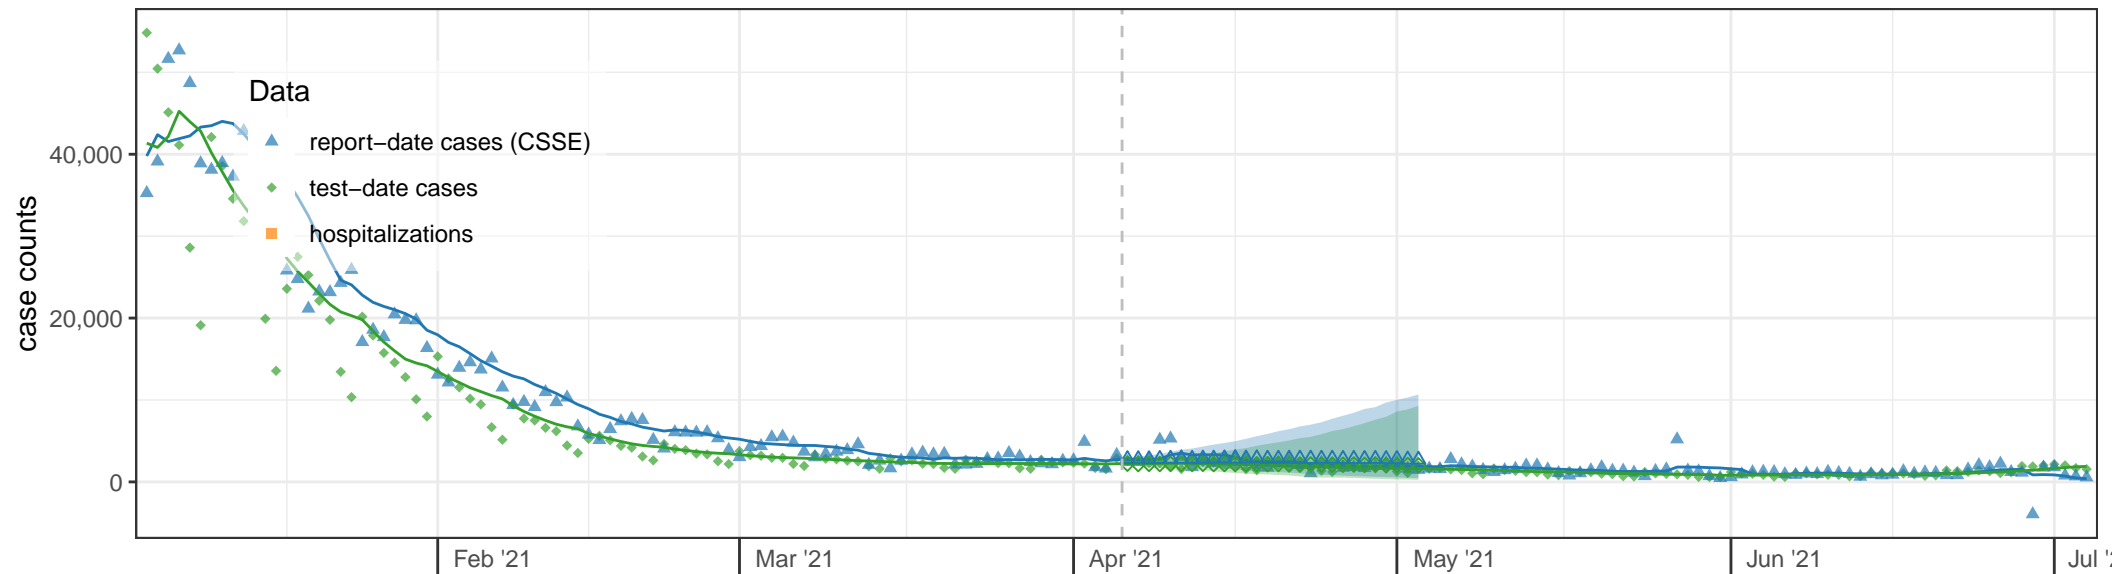

California hospitalization data and forecasts: 2021-04-05

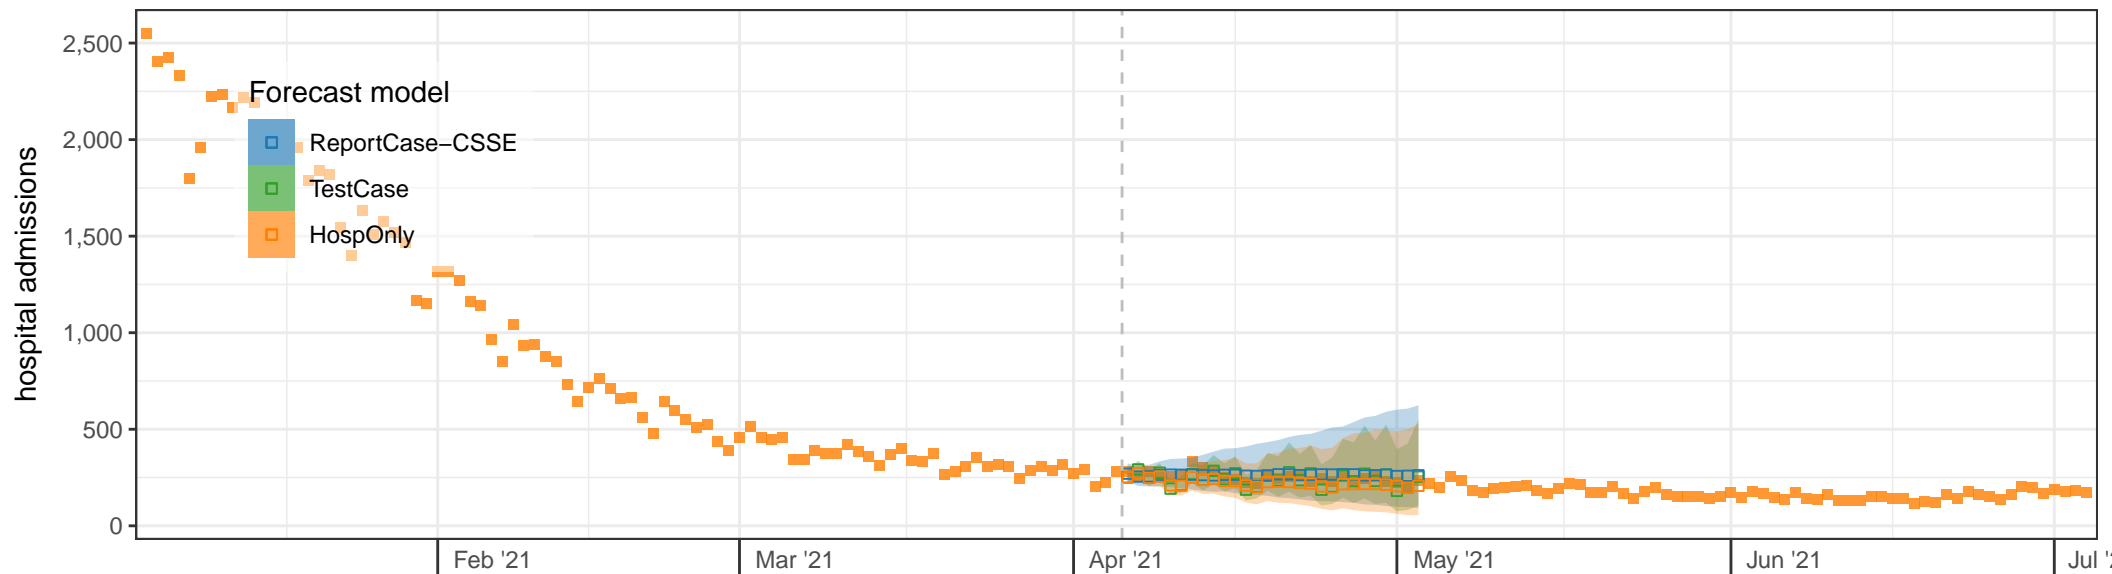

California case data and forecasts: 2021-04-12

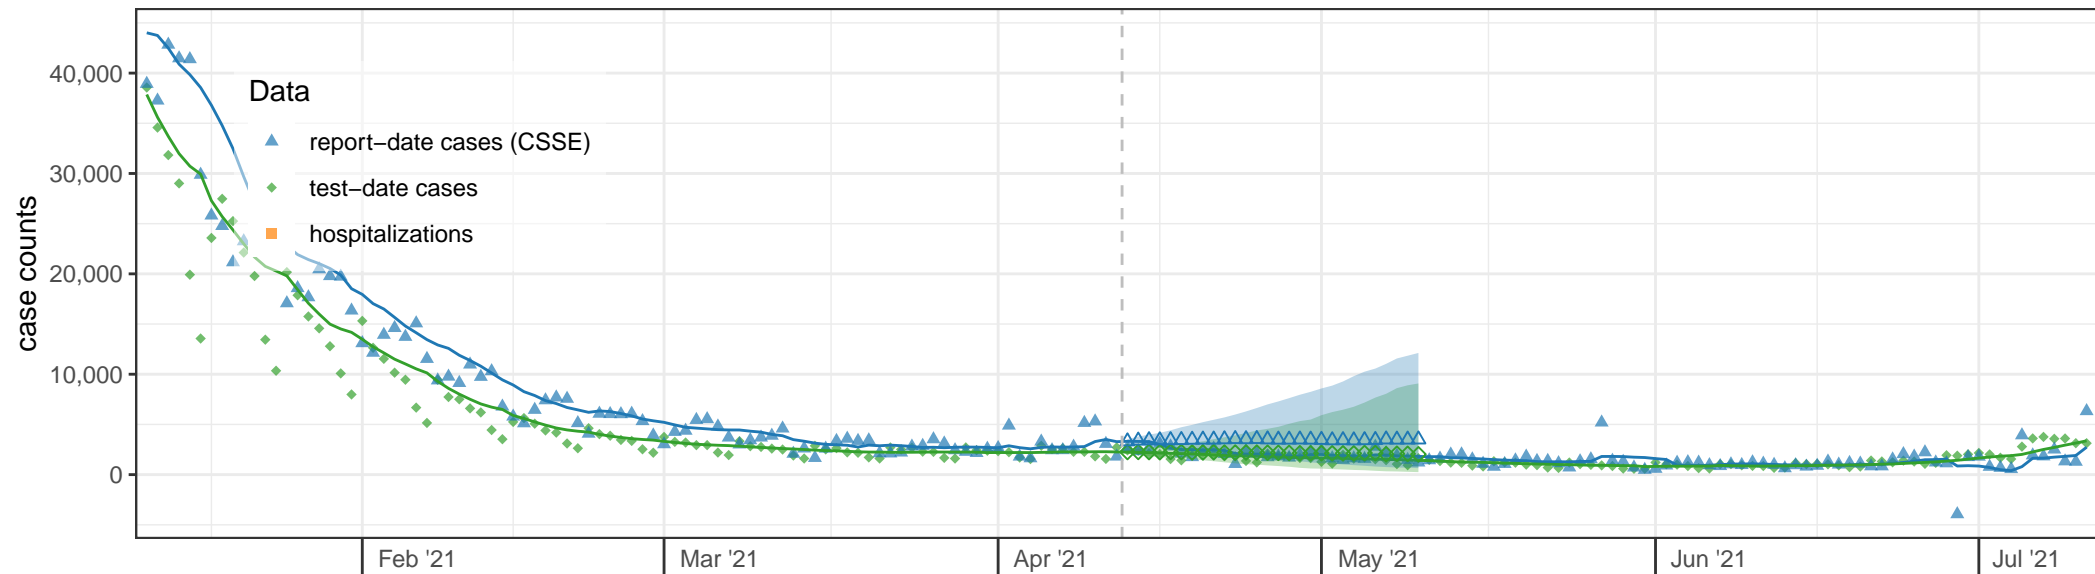

California hospitalization data and forecasts: 2021-04-12

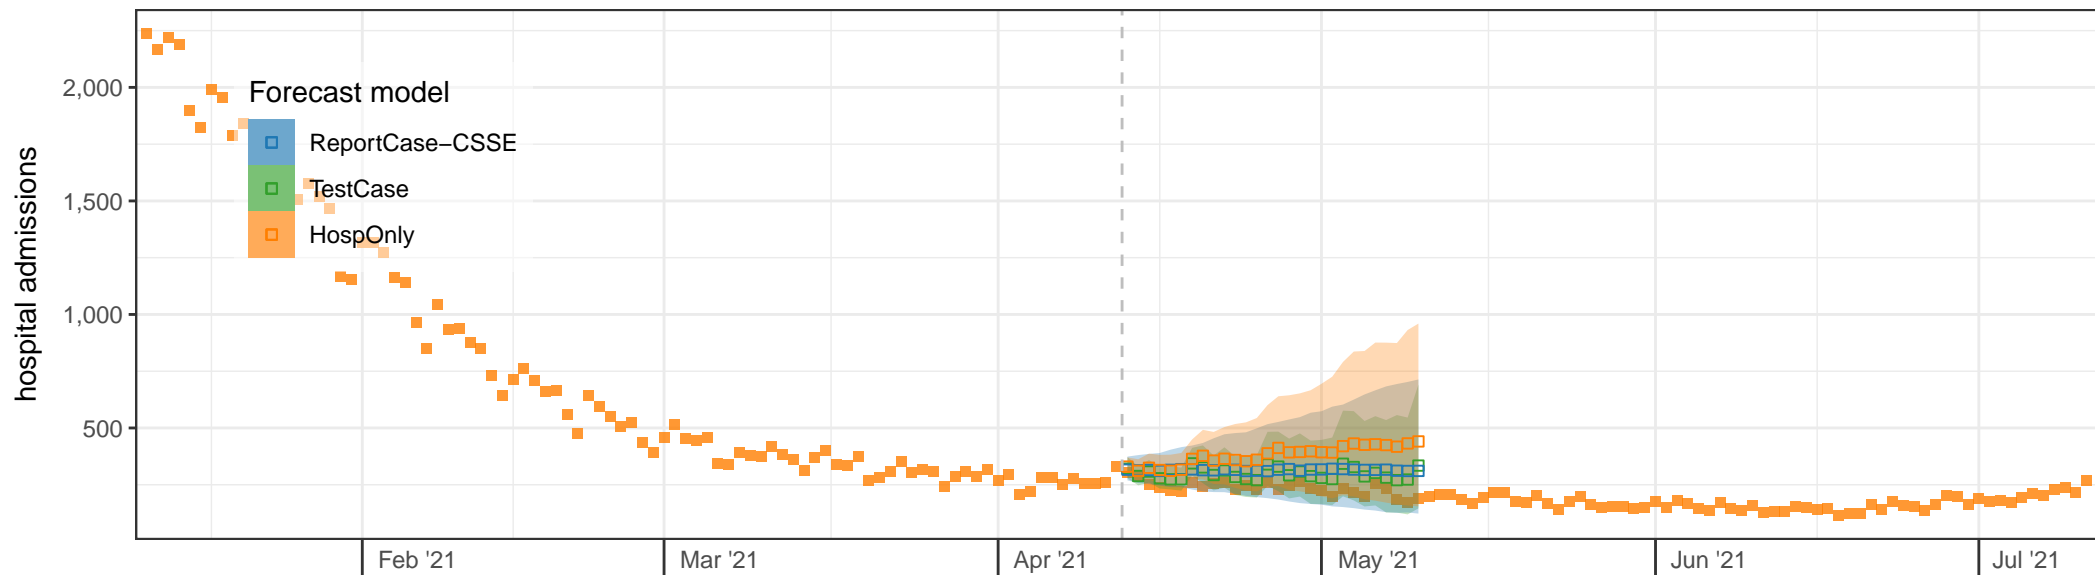

California case data and forecasts: 2021-04-19

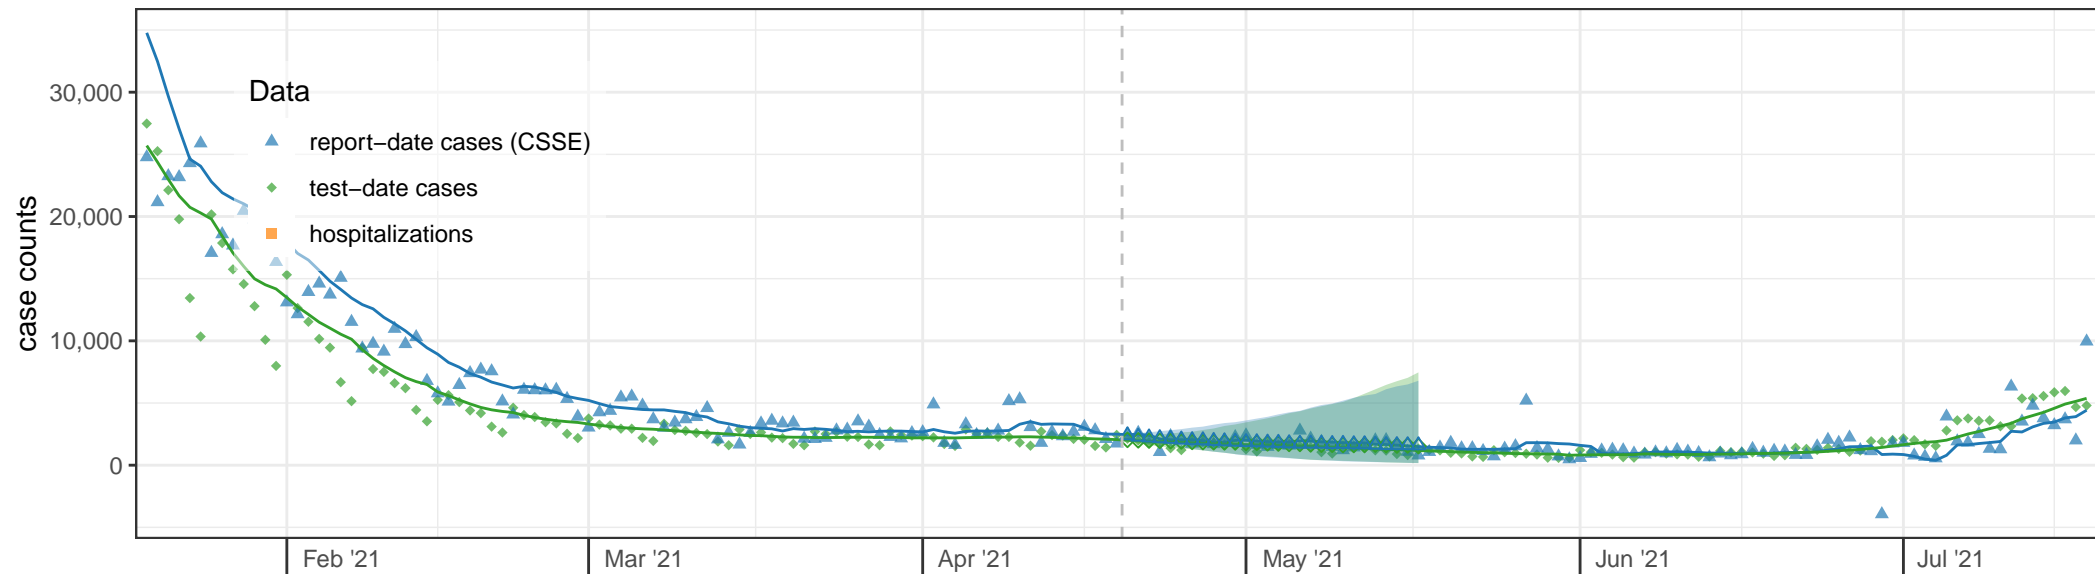

California hospitalization data and forecasts: 2021-04-19

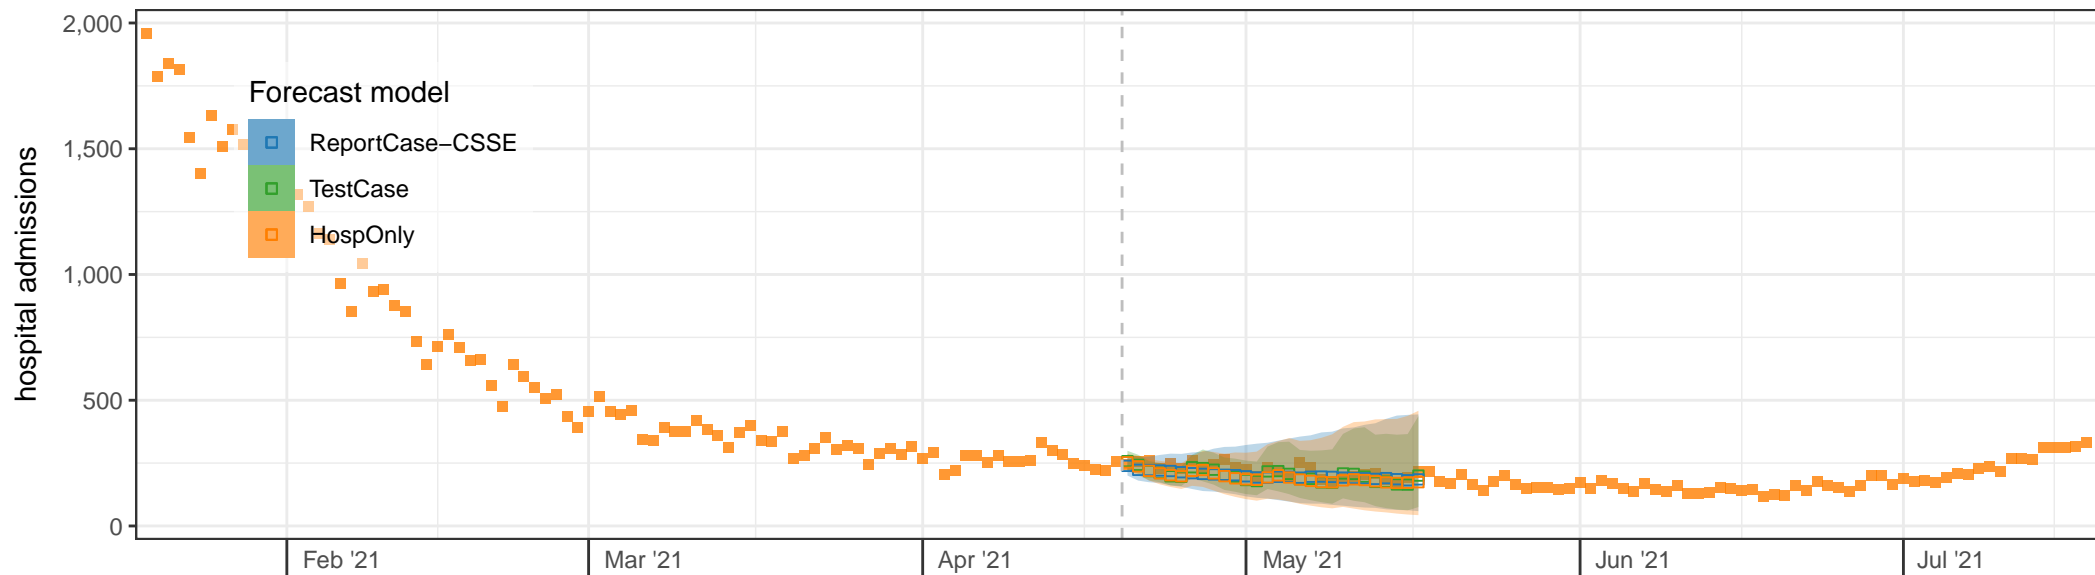

California case data and forecasts: 2021-04-26

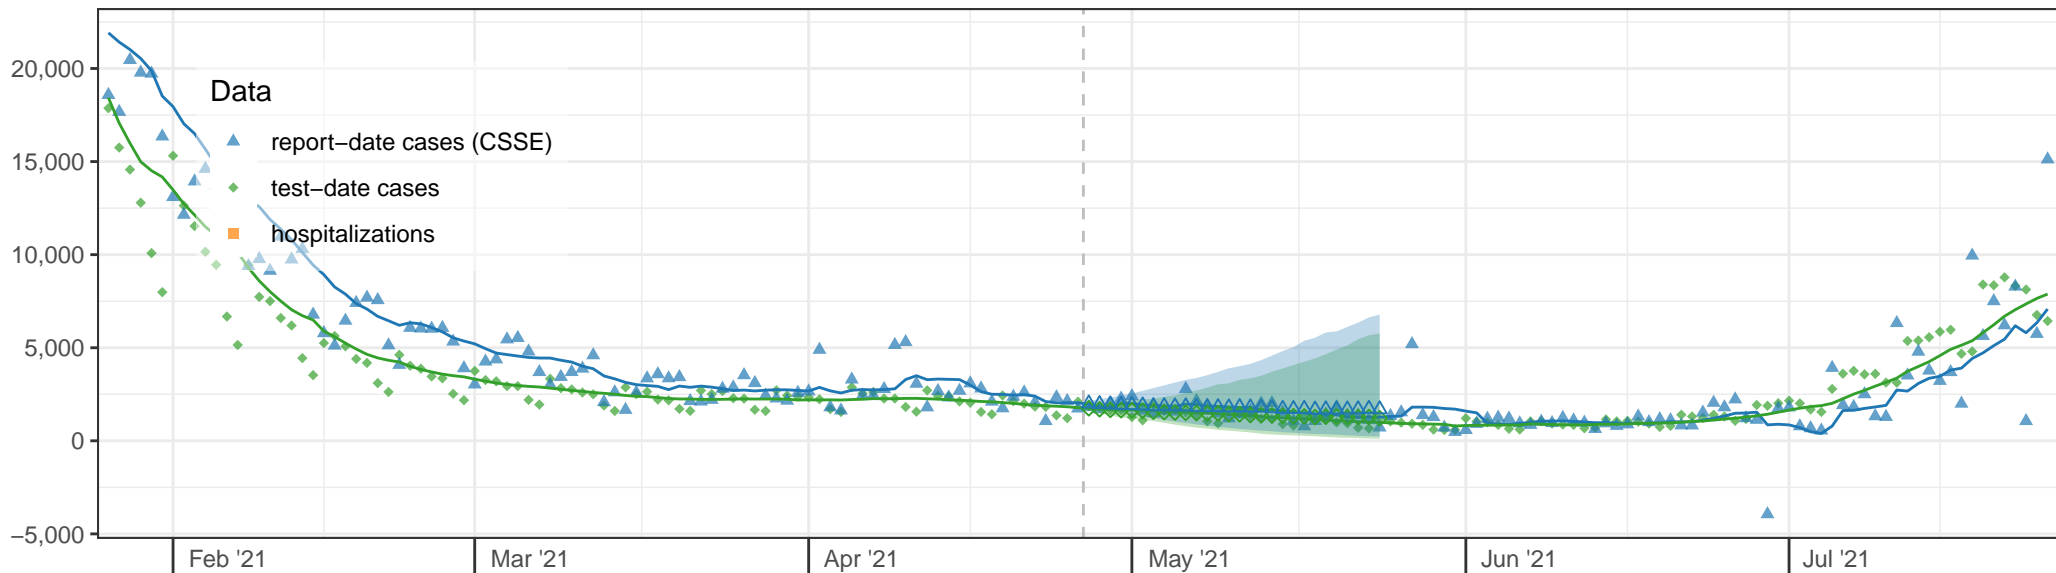

California hospitalization data and forecasts: 2021-04-26

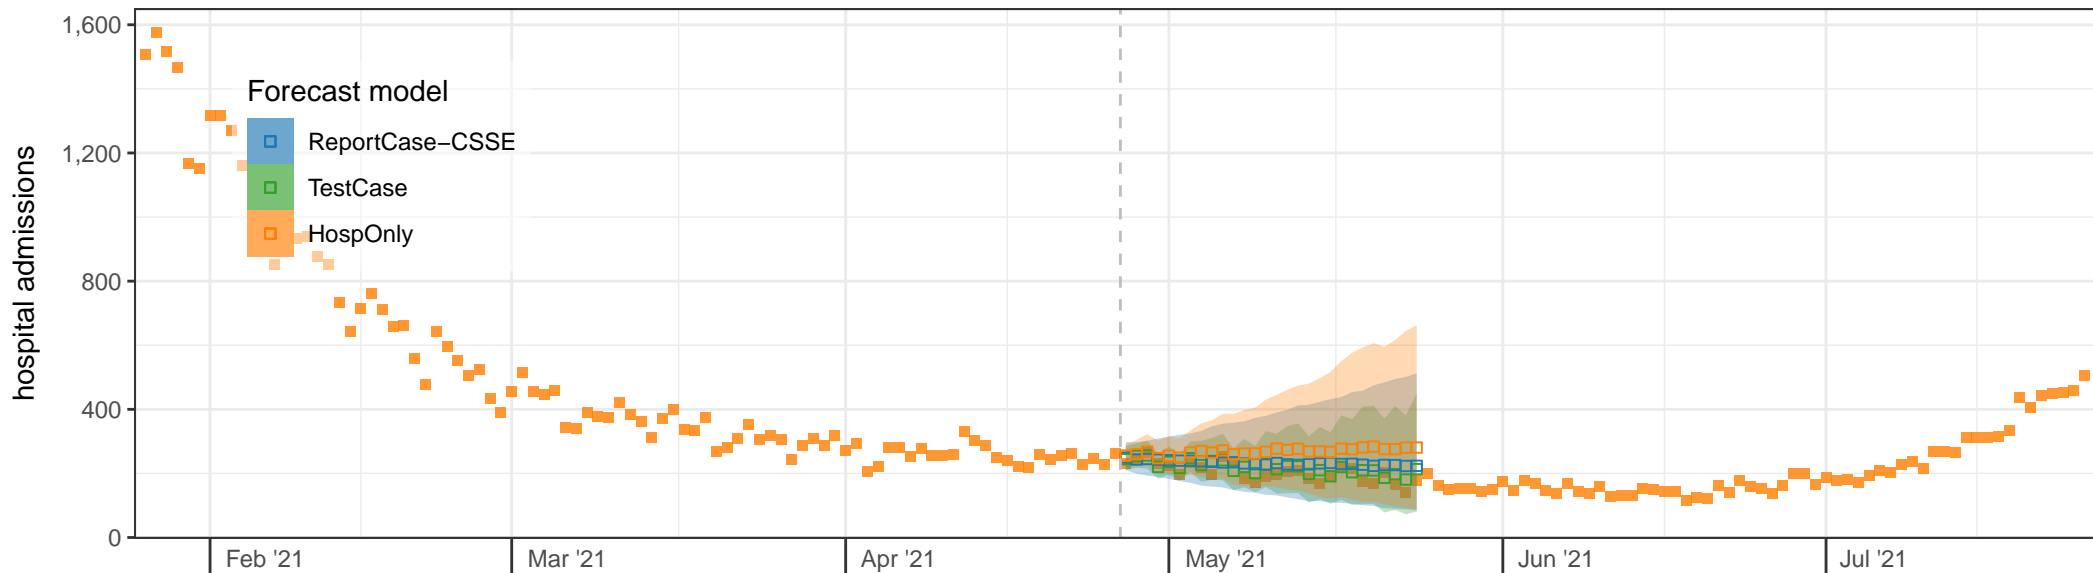

California case data and forecasts: 2021-05-03

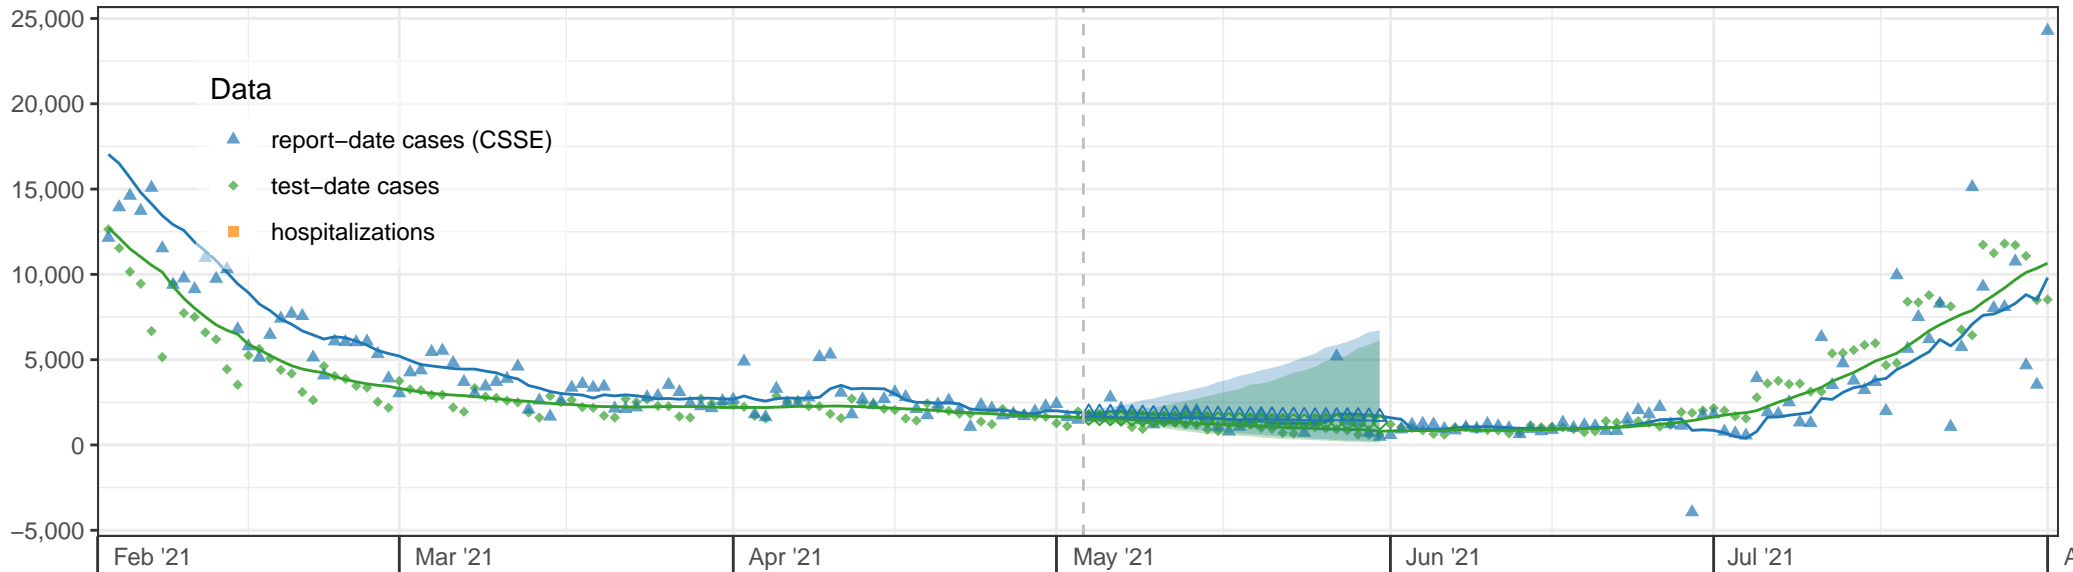

California hospitalization data and forecasts: 2021-05-03

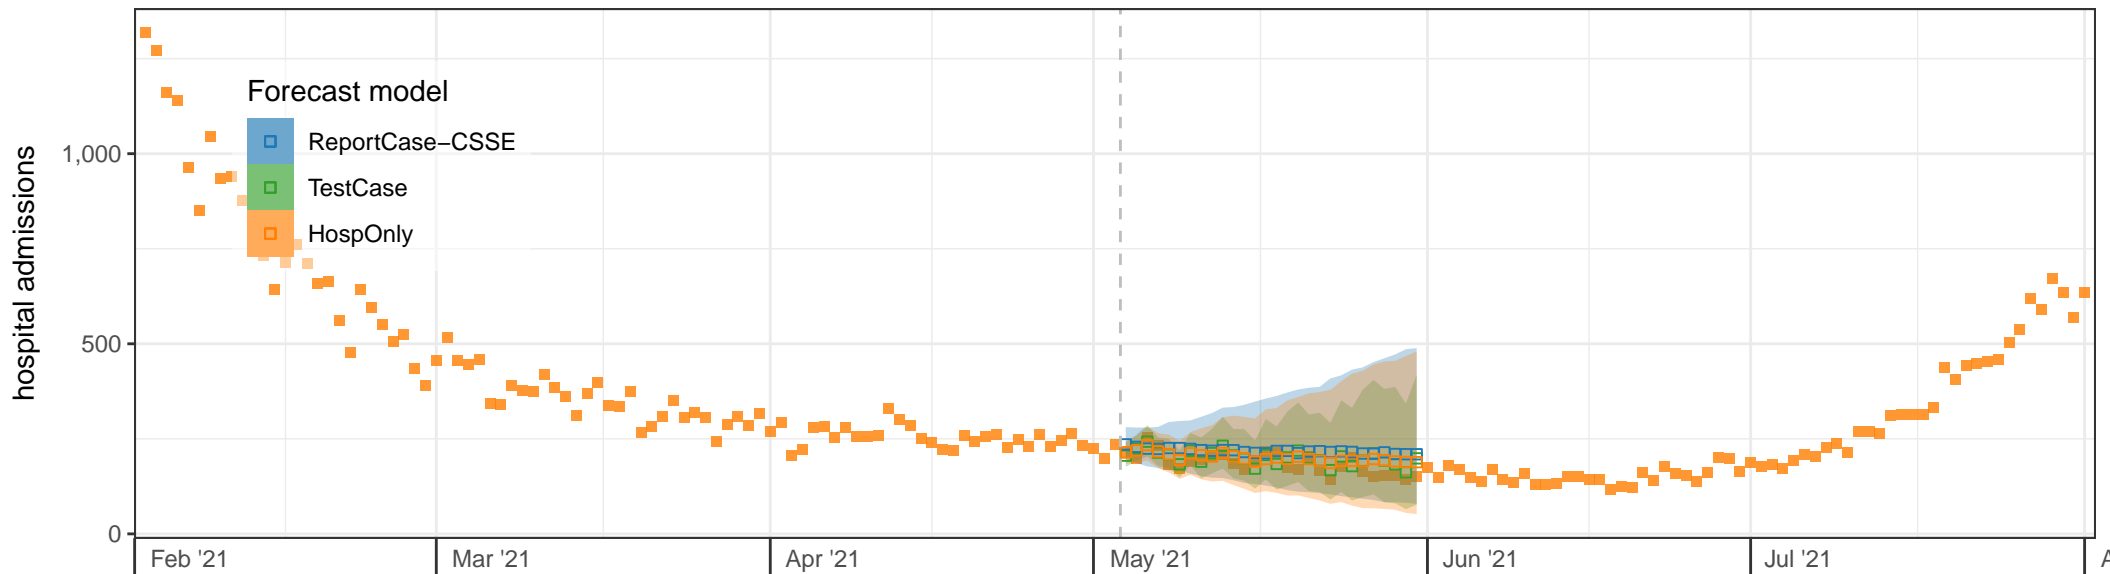

California case data and forecasts: 2021-05-10

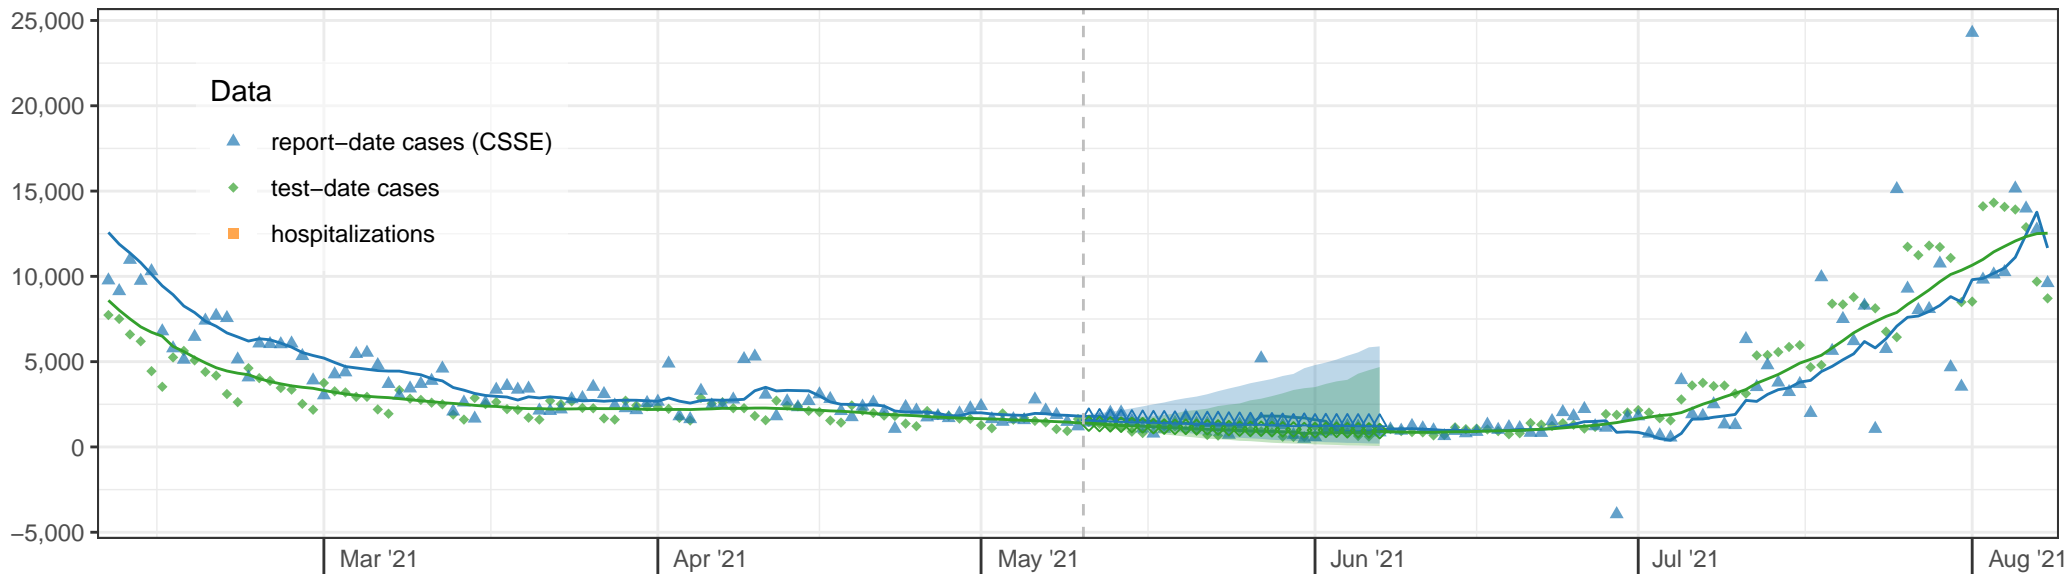

California hospitalization data and forecasts: 2021-05-10

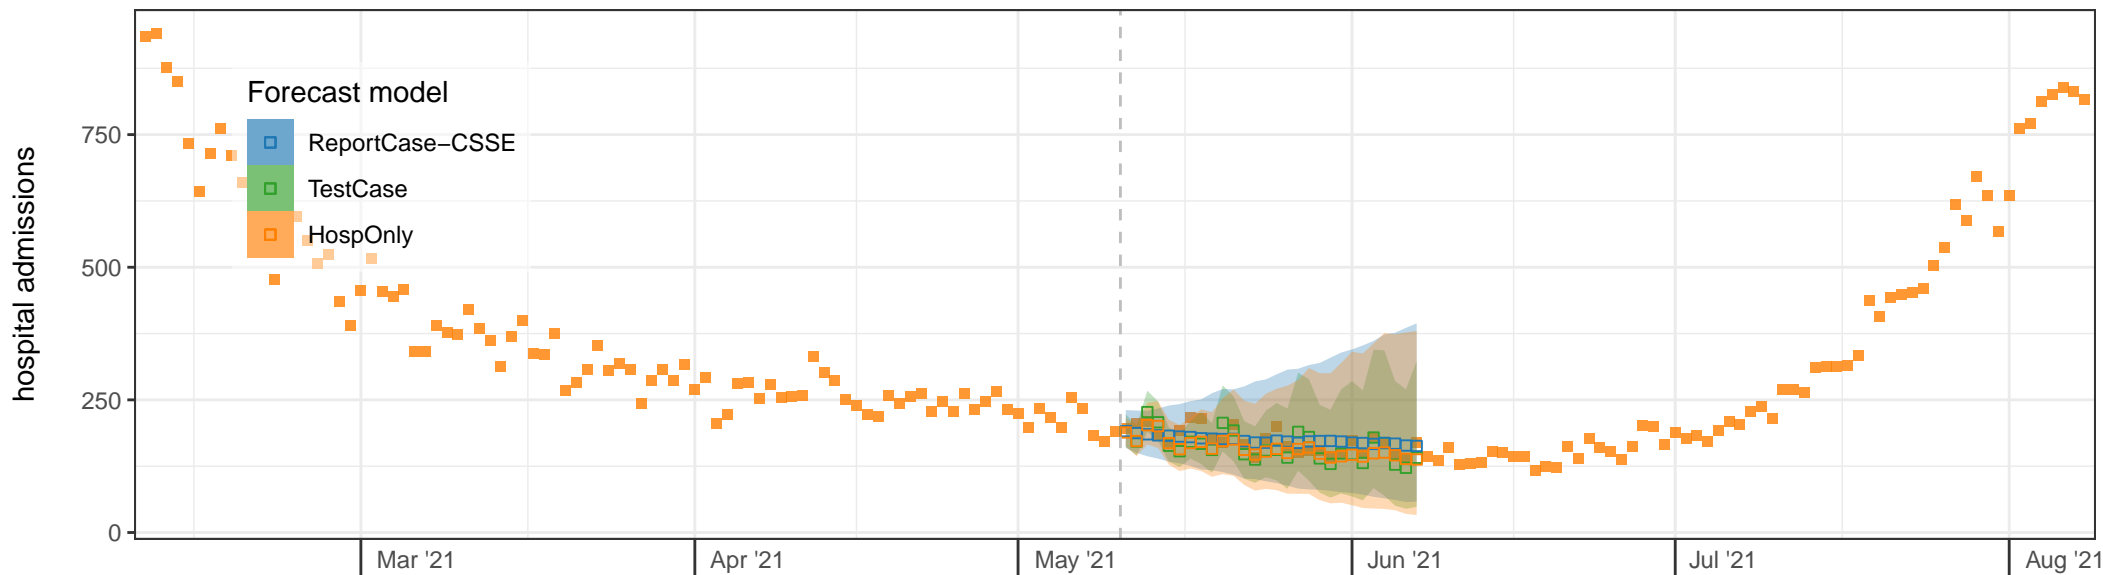

California case data and forecasts: 2021-05-17

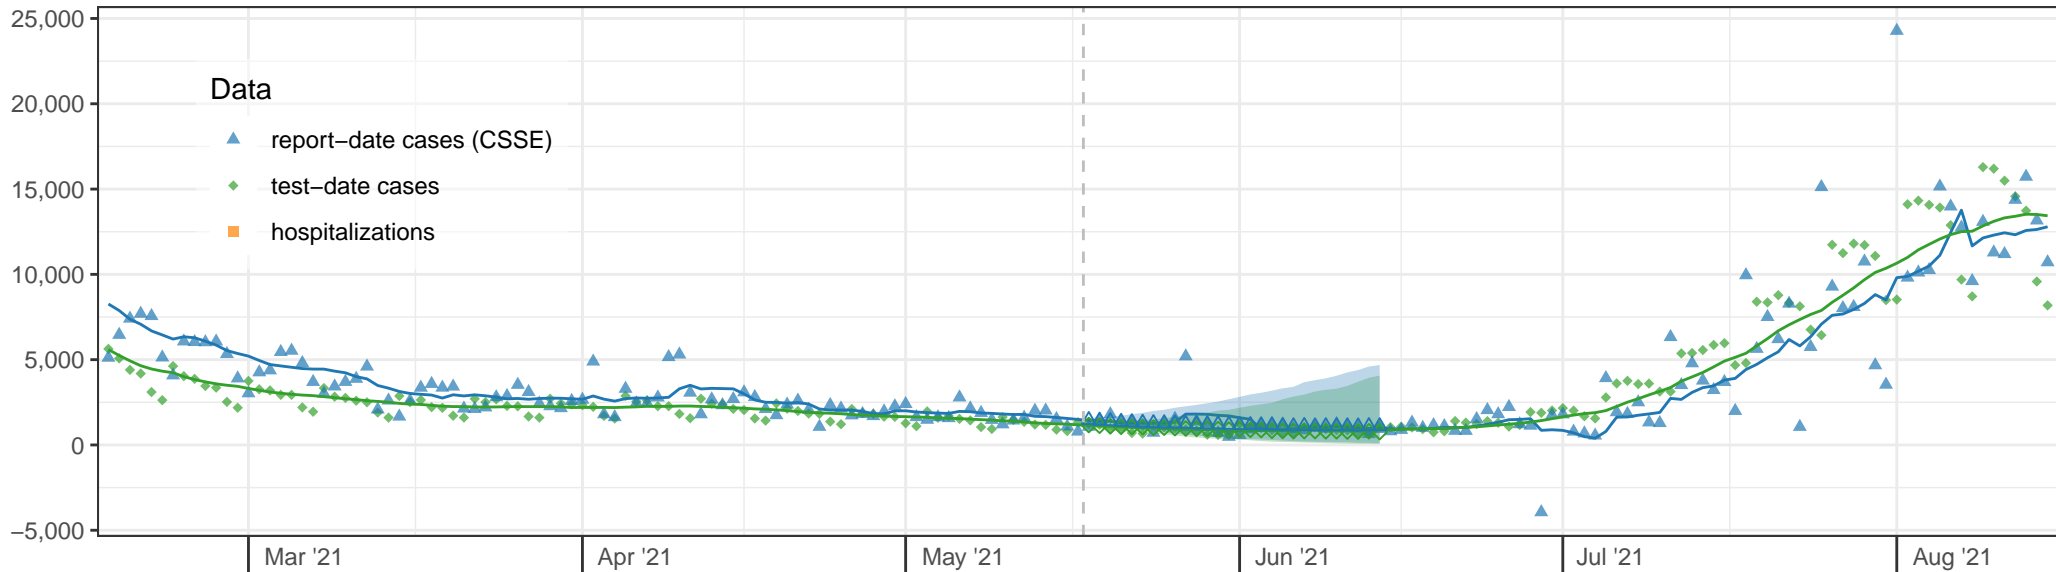

California hospitalization data and forecasts: 2021-05-17

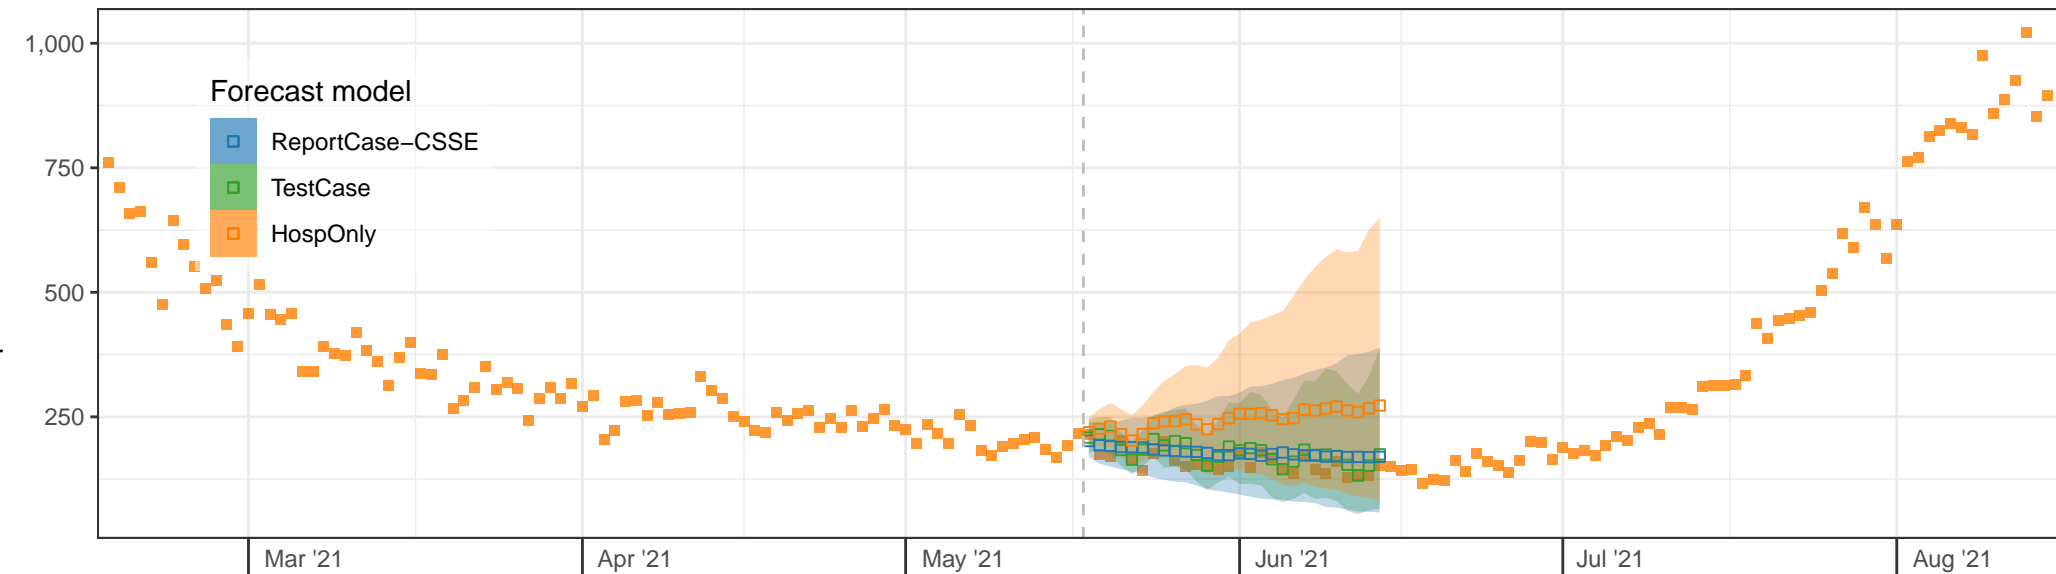



California case data and forecasts: 2021-05-24

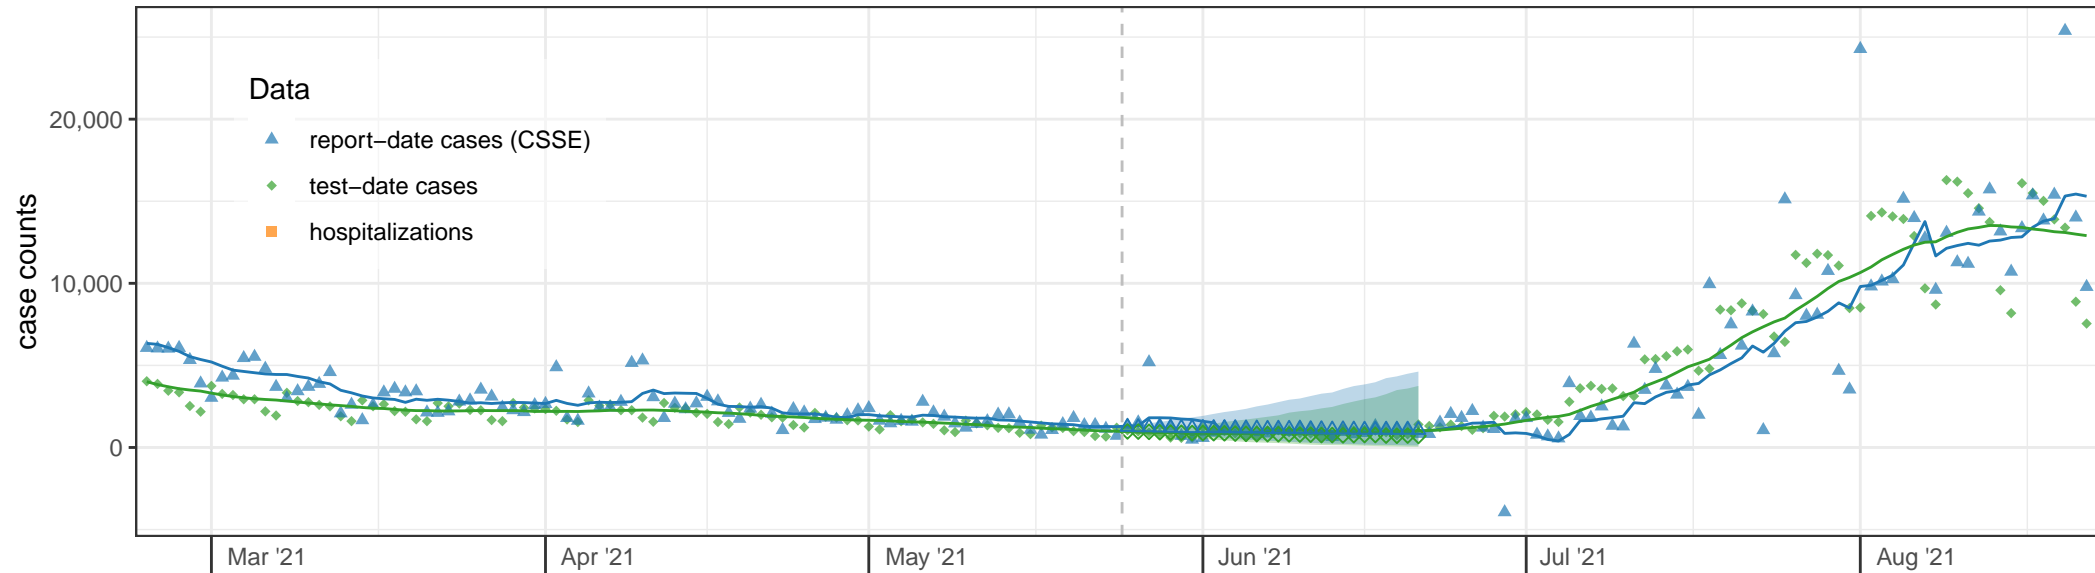

California hospitalization data and forecasts: 2021-05-24

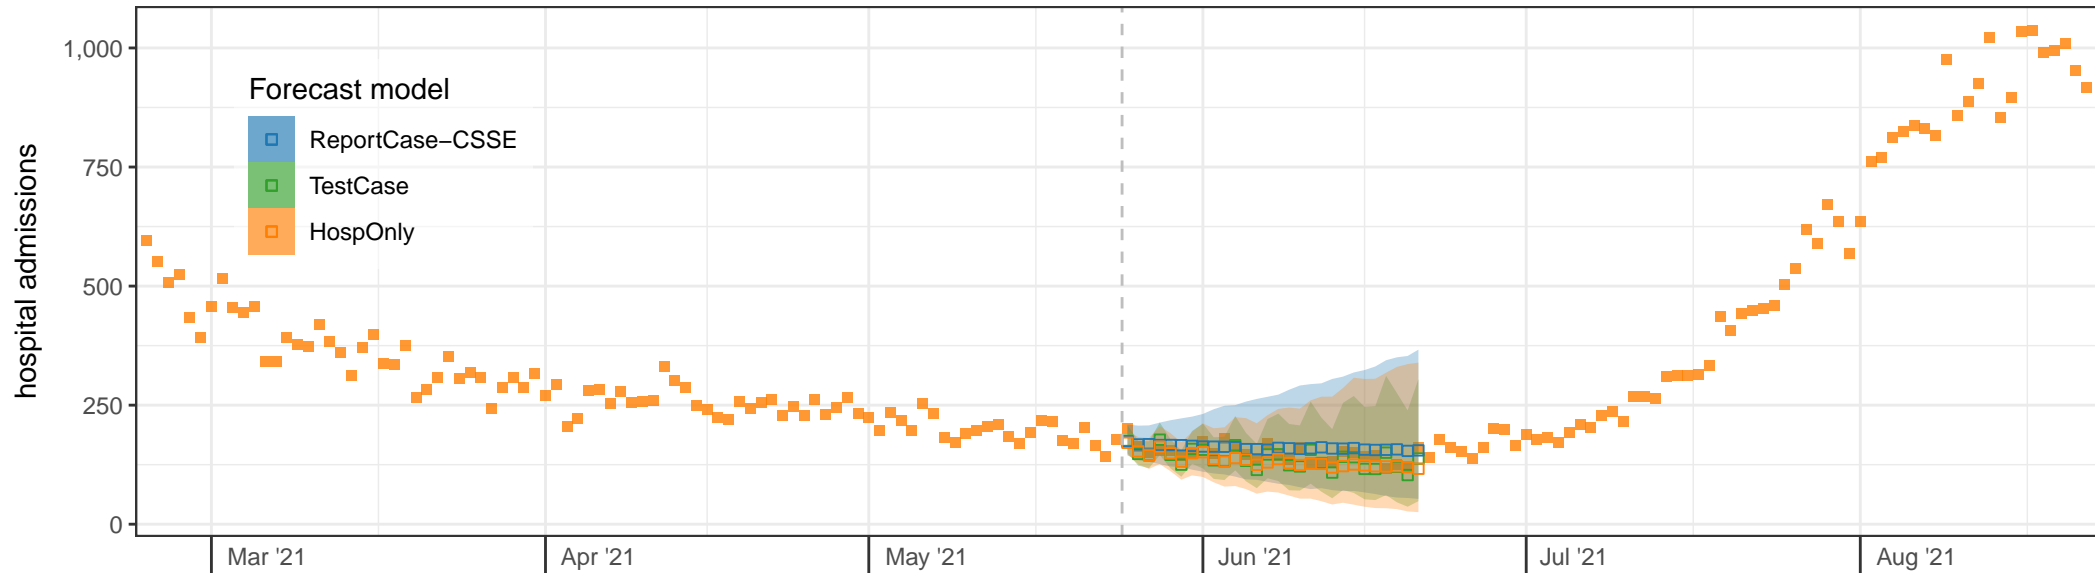

California case data and forecasts: 2021-05-31

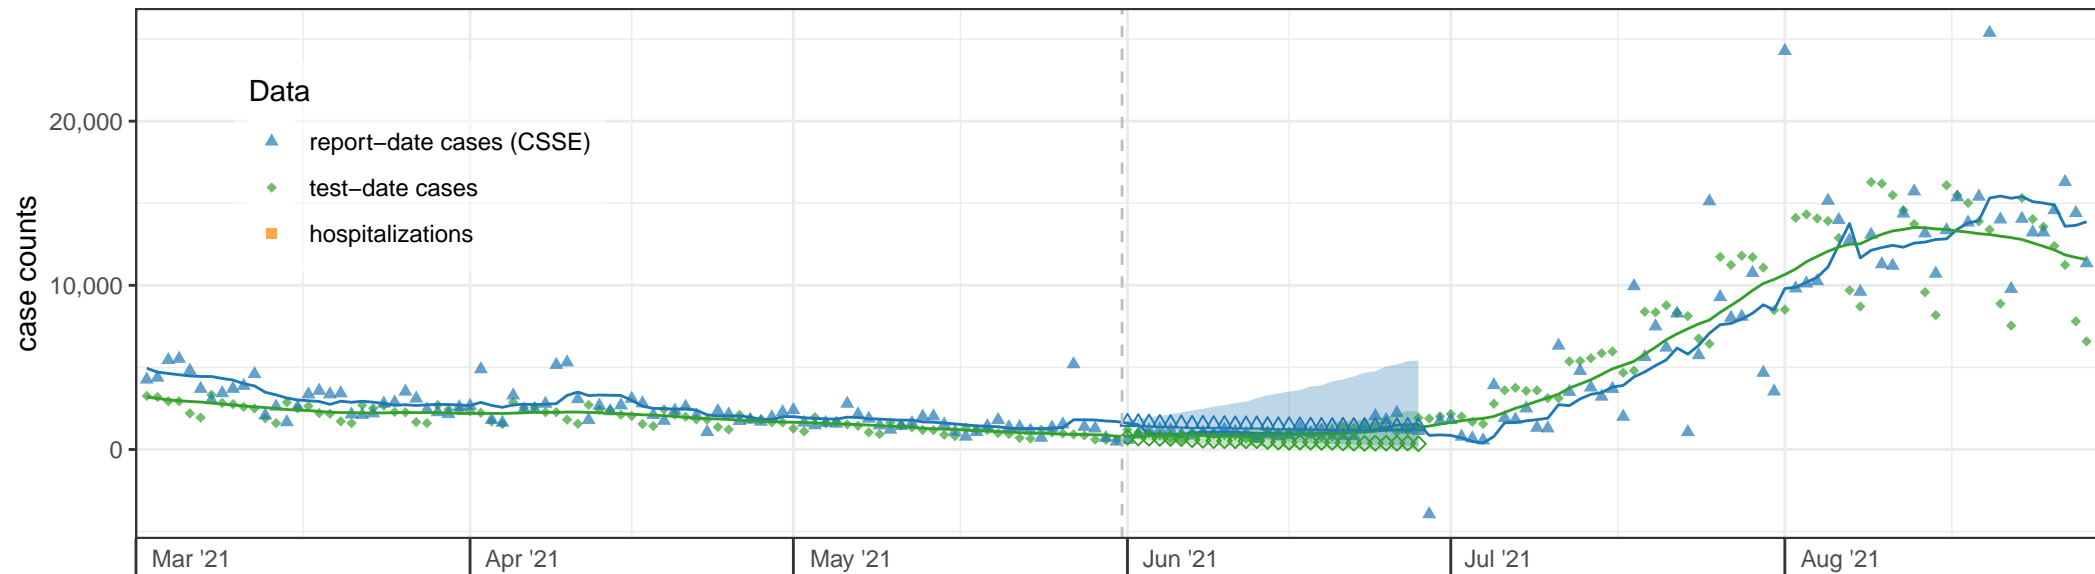

California hospitalization data and forecasts: 2021-05-31

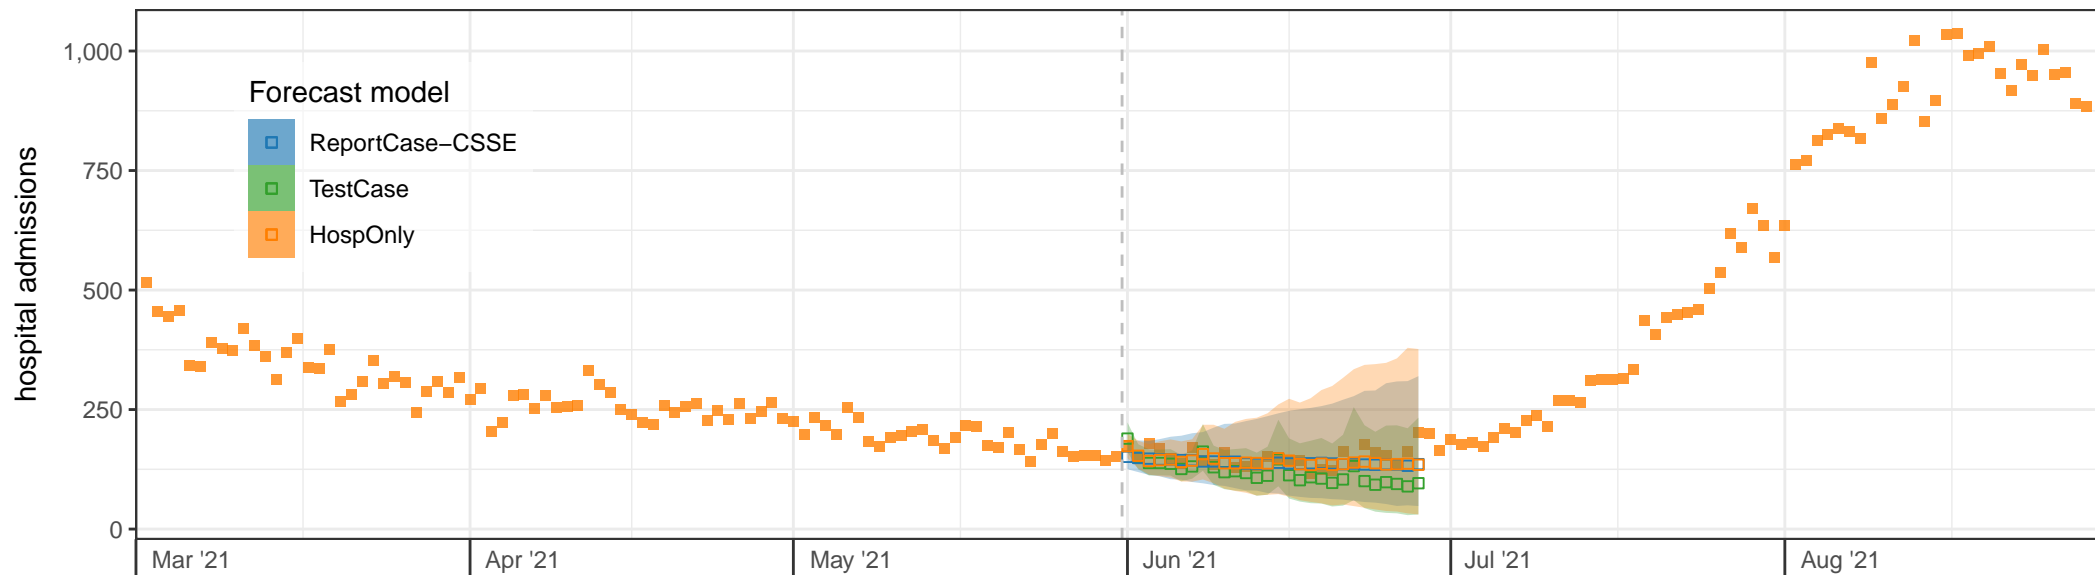

California case data and forecasts: 2021-06-07

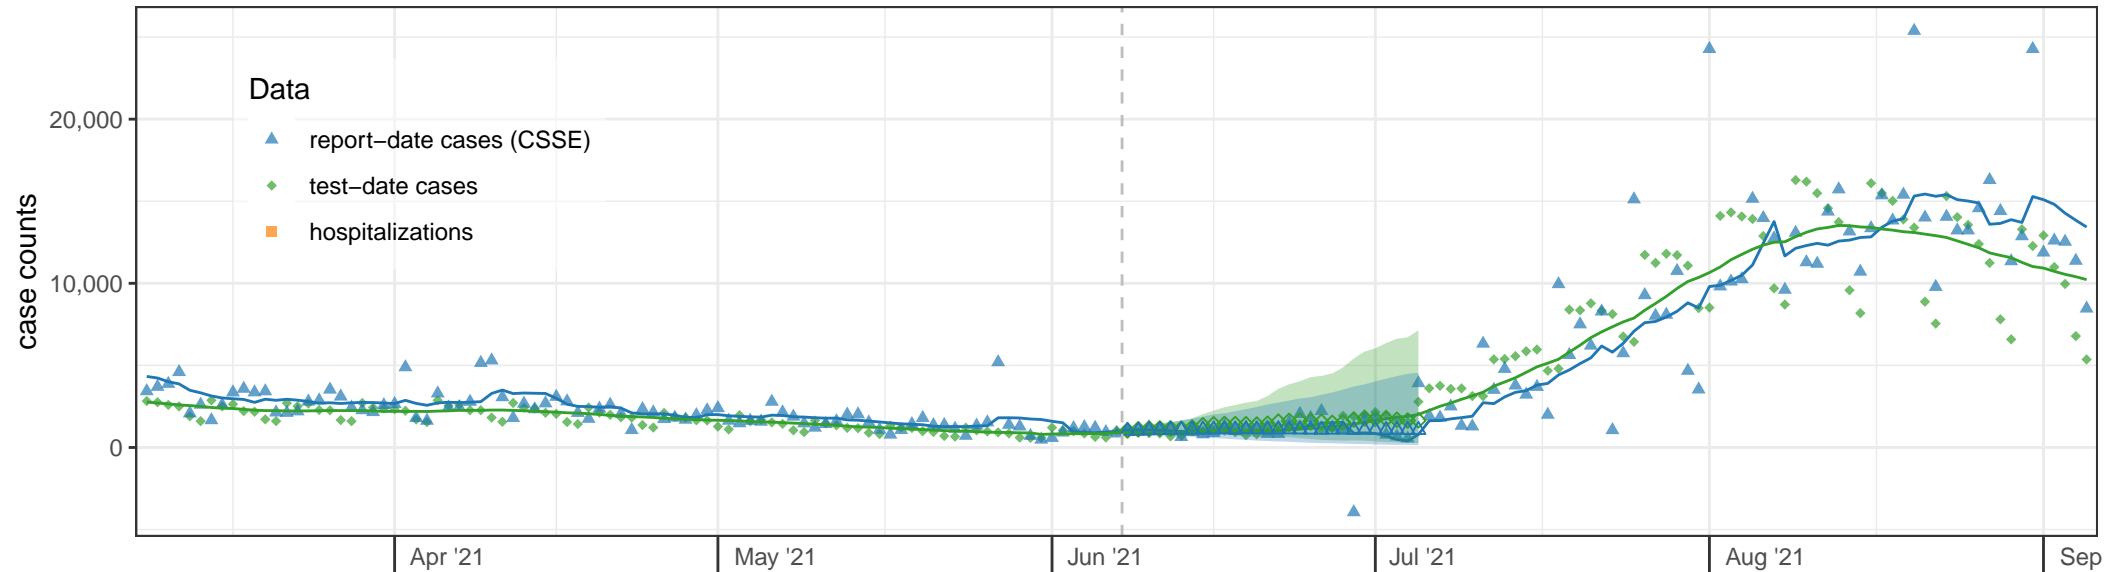

California hospitalization data and forecasts: 2021-06-07

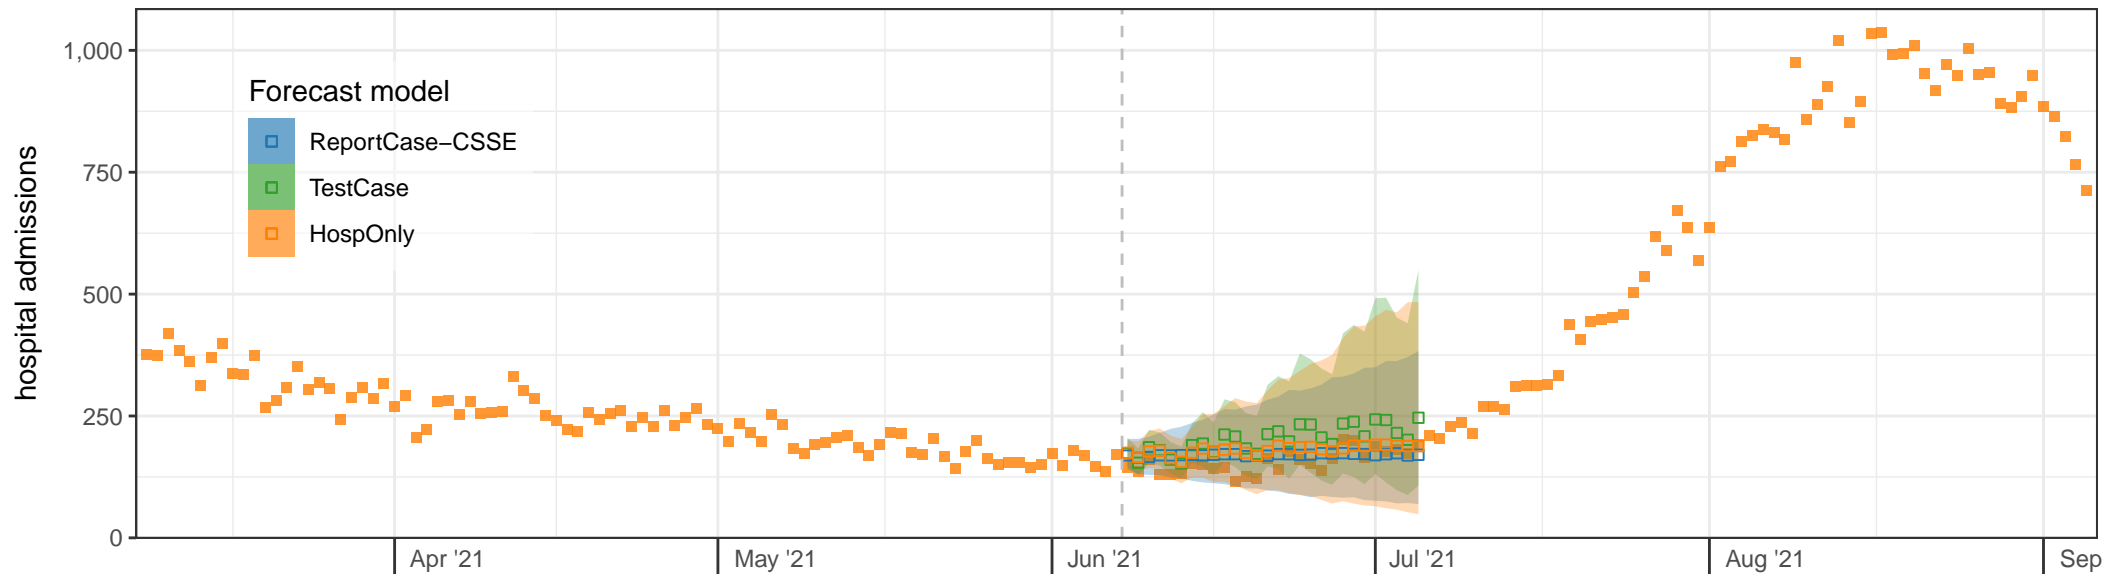

California case data and forecasts: 2021-06-14

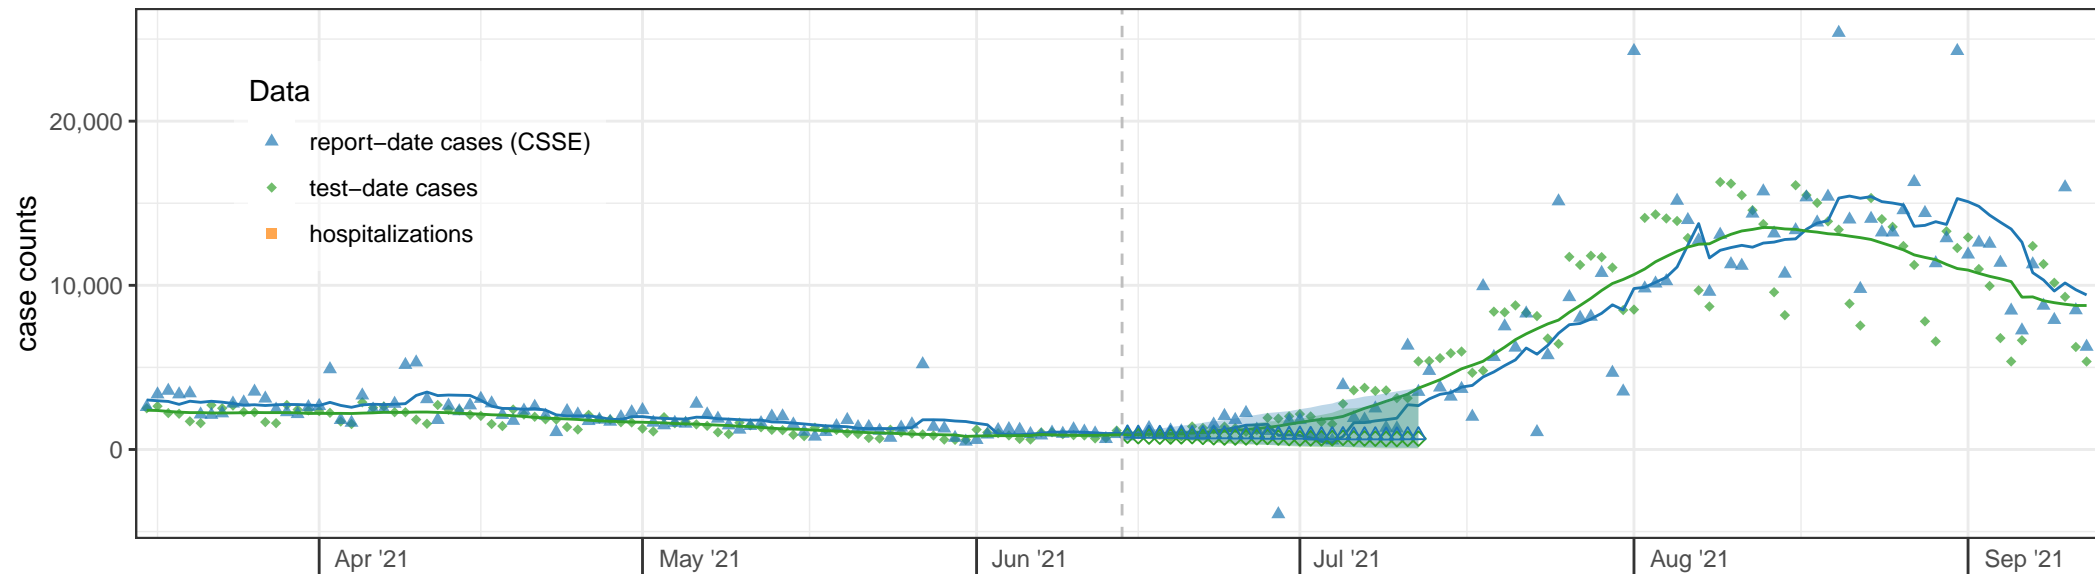

California hospitalization data and forecasts: 2021-06-14

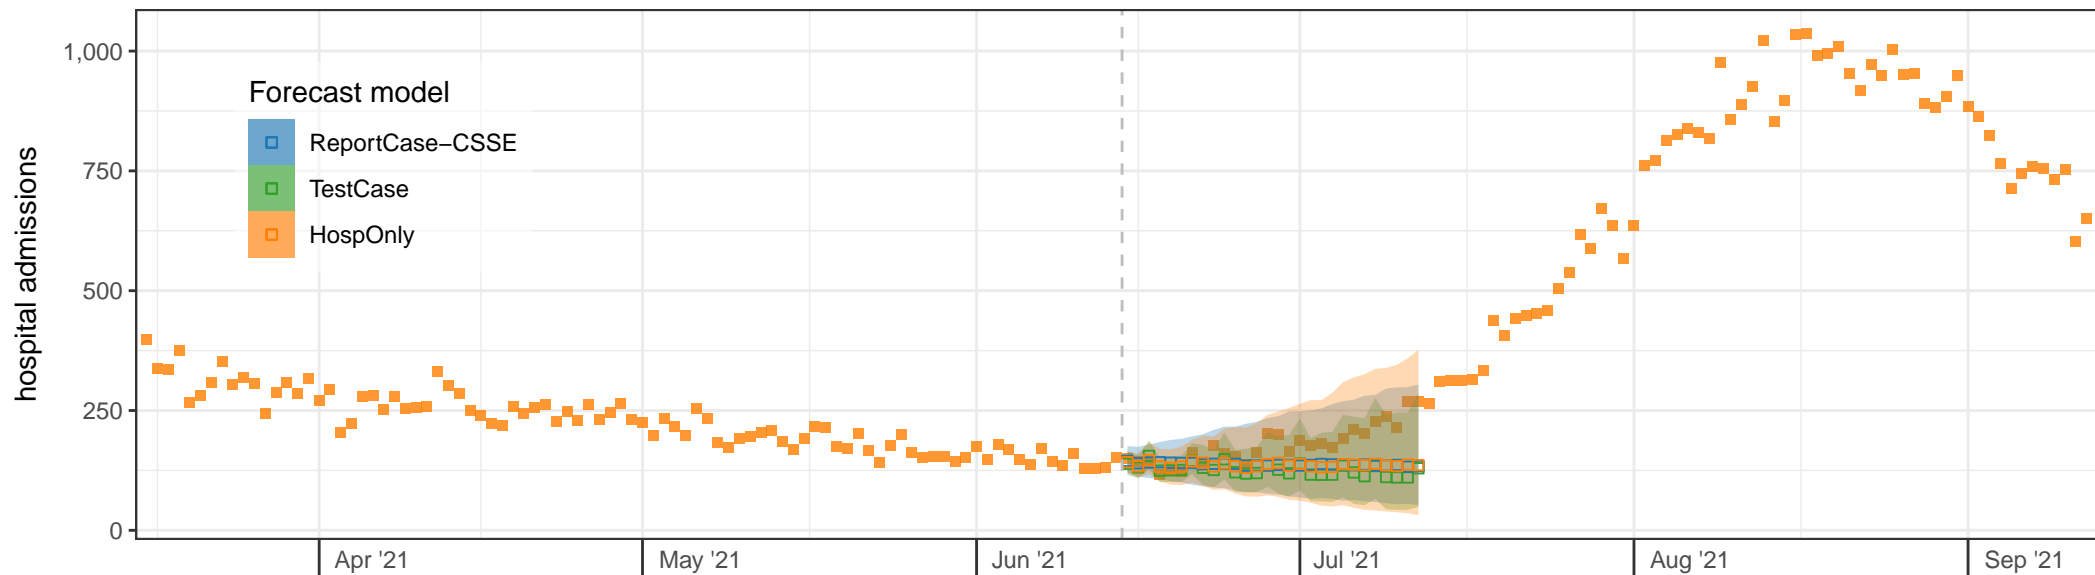

California case data and forecasts: 2021-06-21

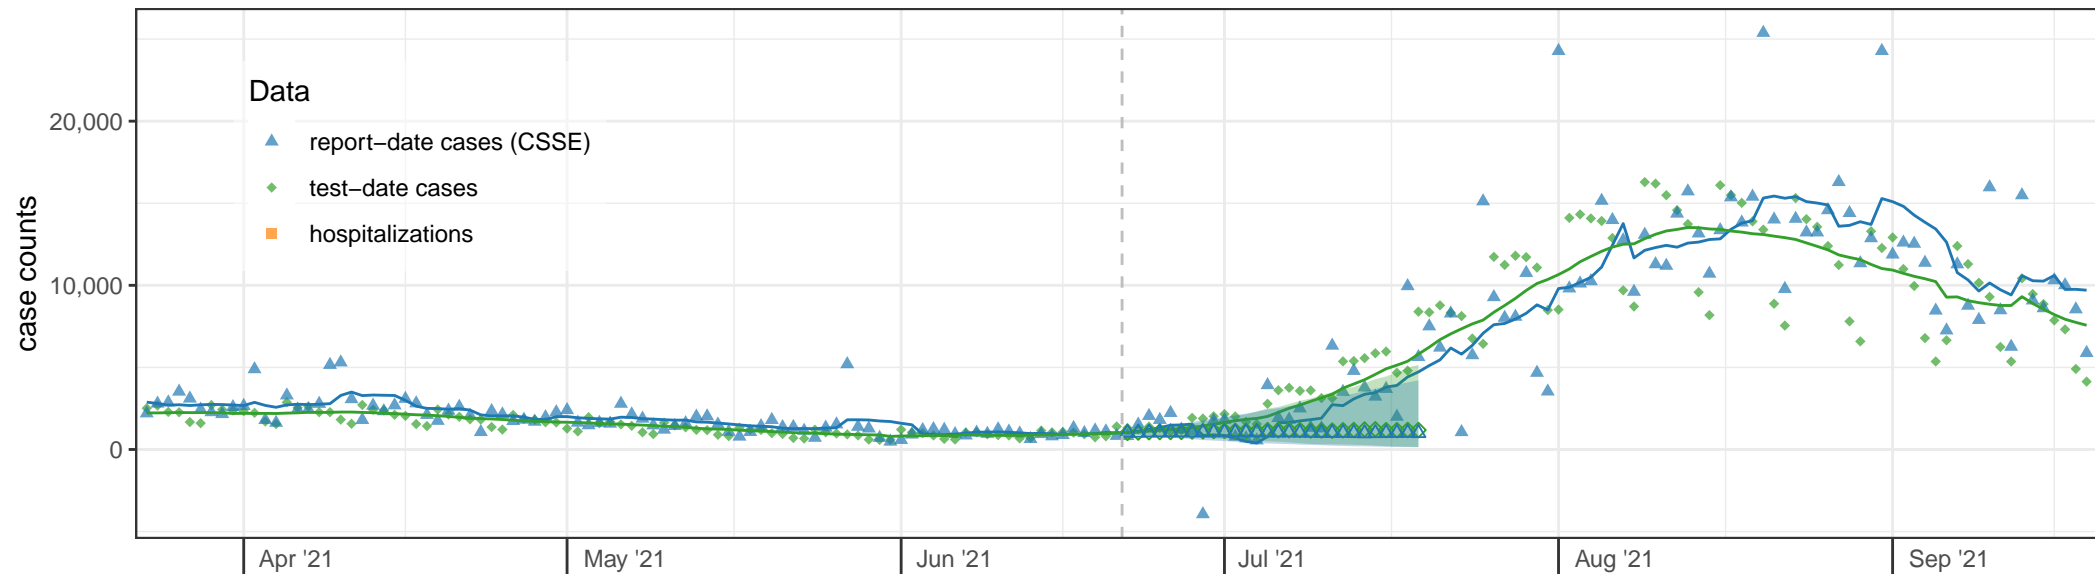

California hospitalization data and forecasts: 2021-06-21

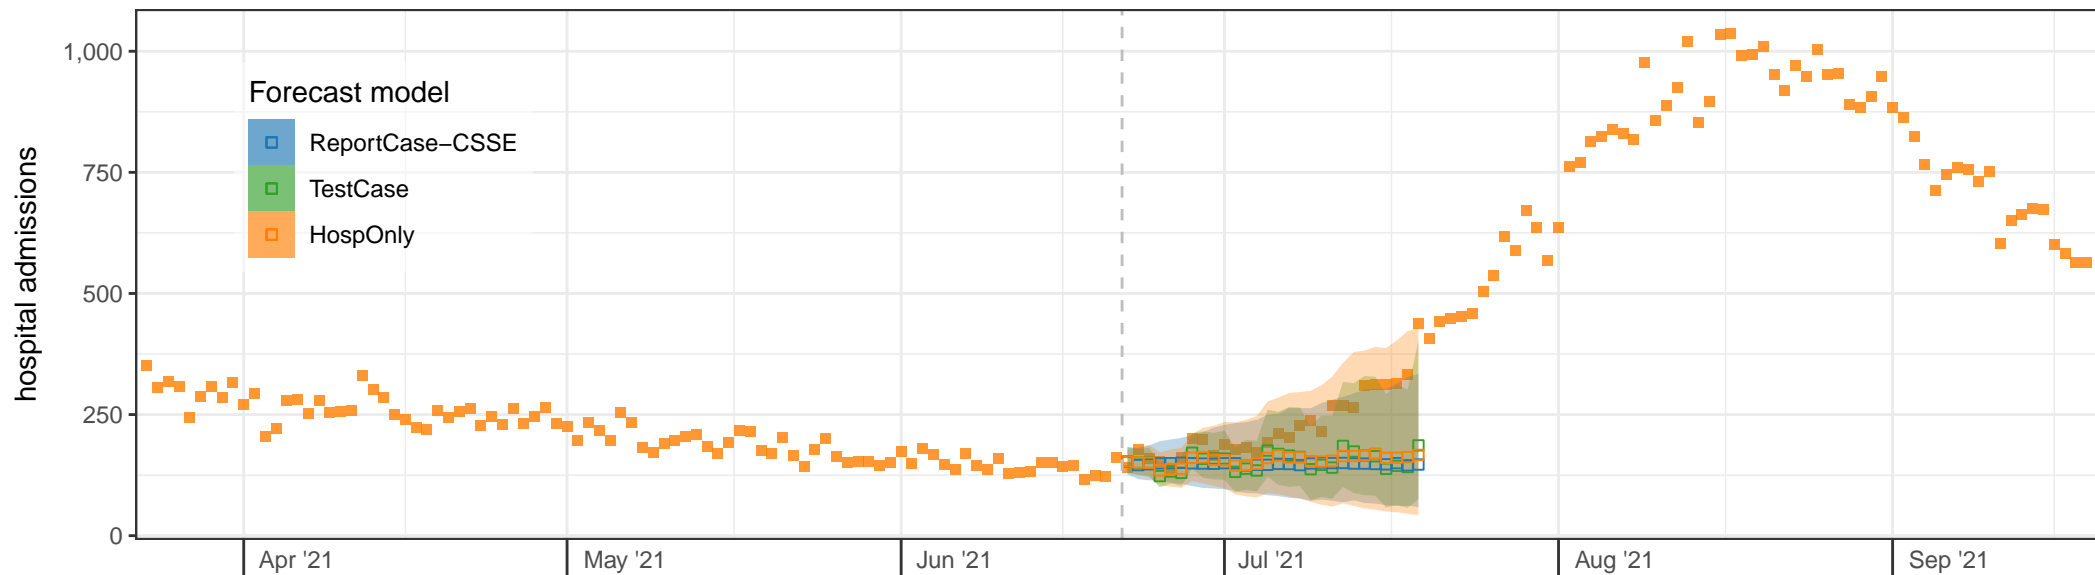

California case data and forecasts: 2021-06-28

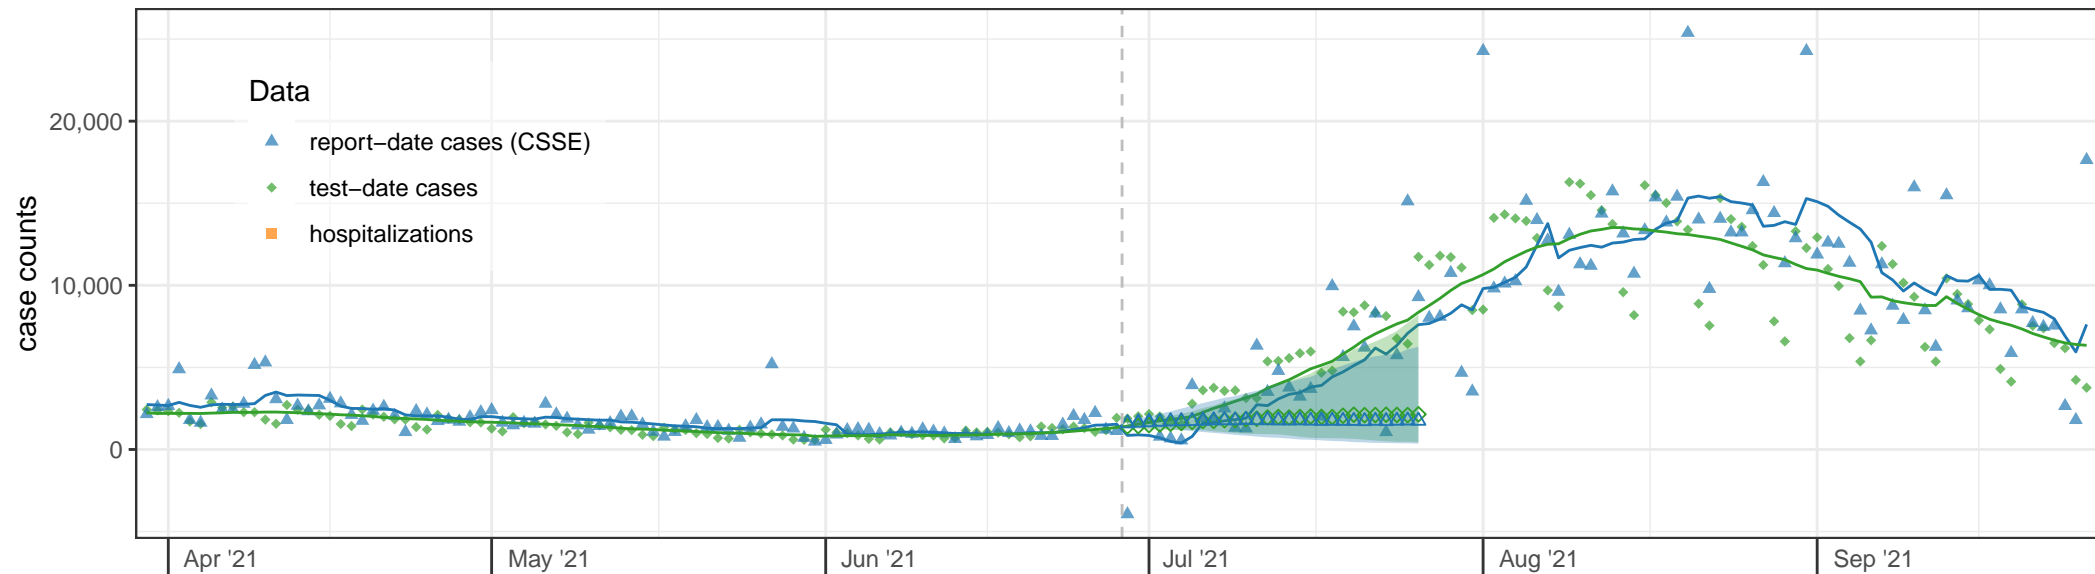

California hospitalization data and forecasts: 2021-06-28

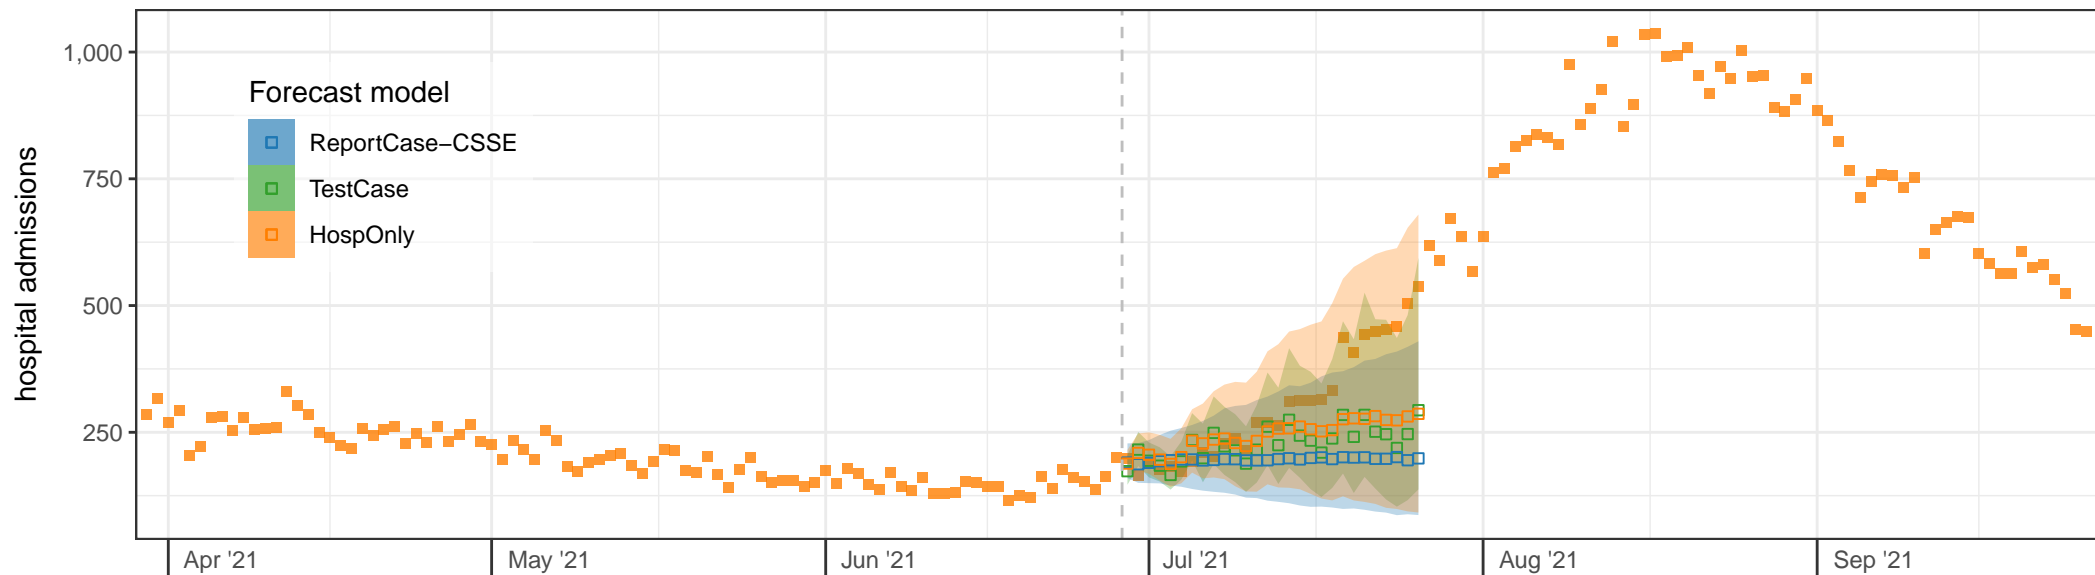

California case data and forecasts: 2021-07-05

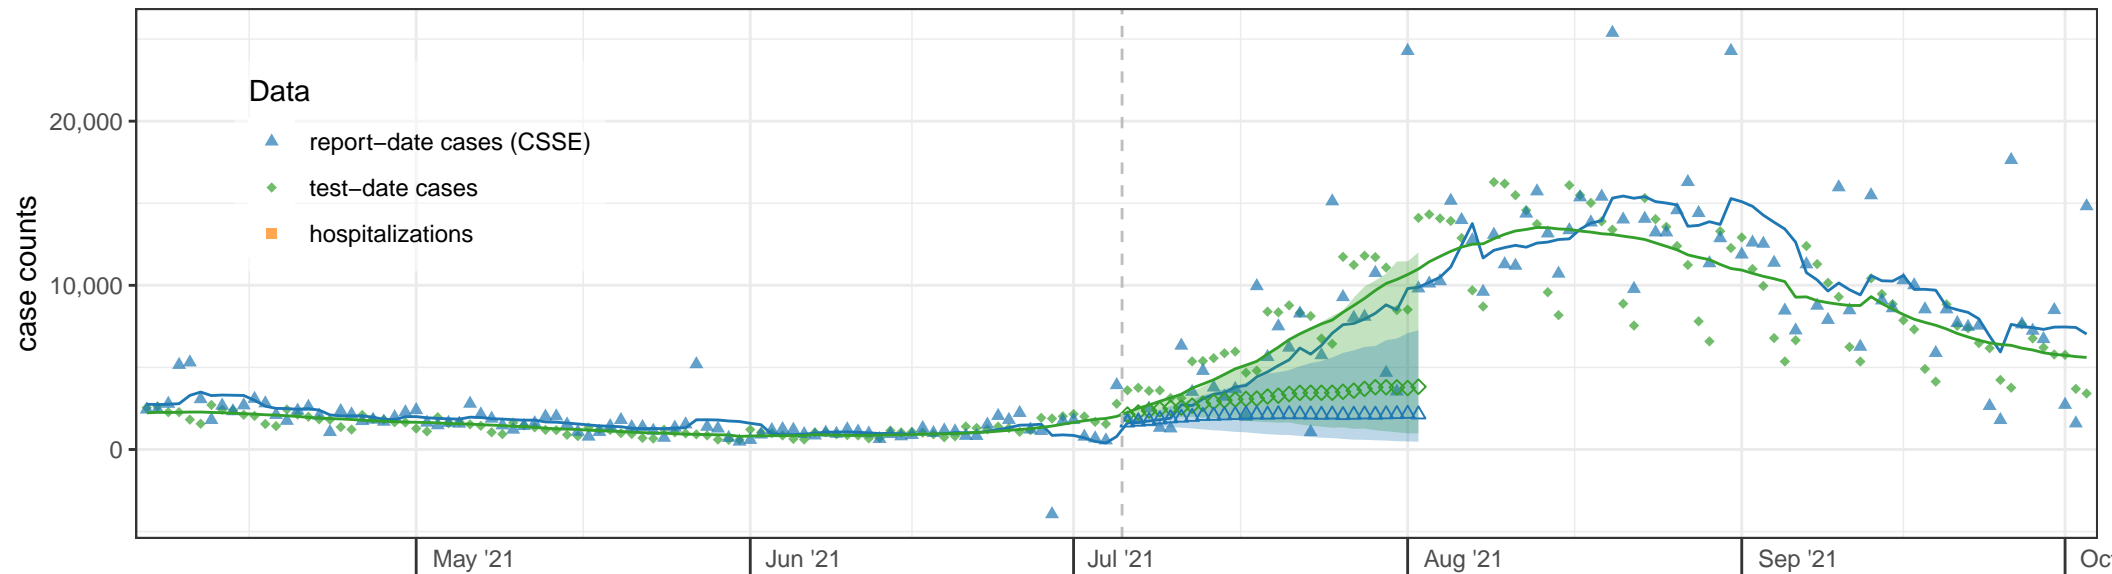

California hospitalization data and forecasts: 2021-07-05

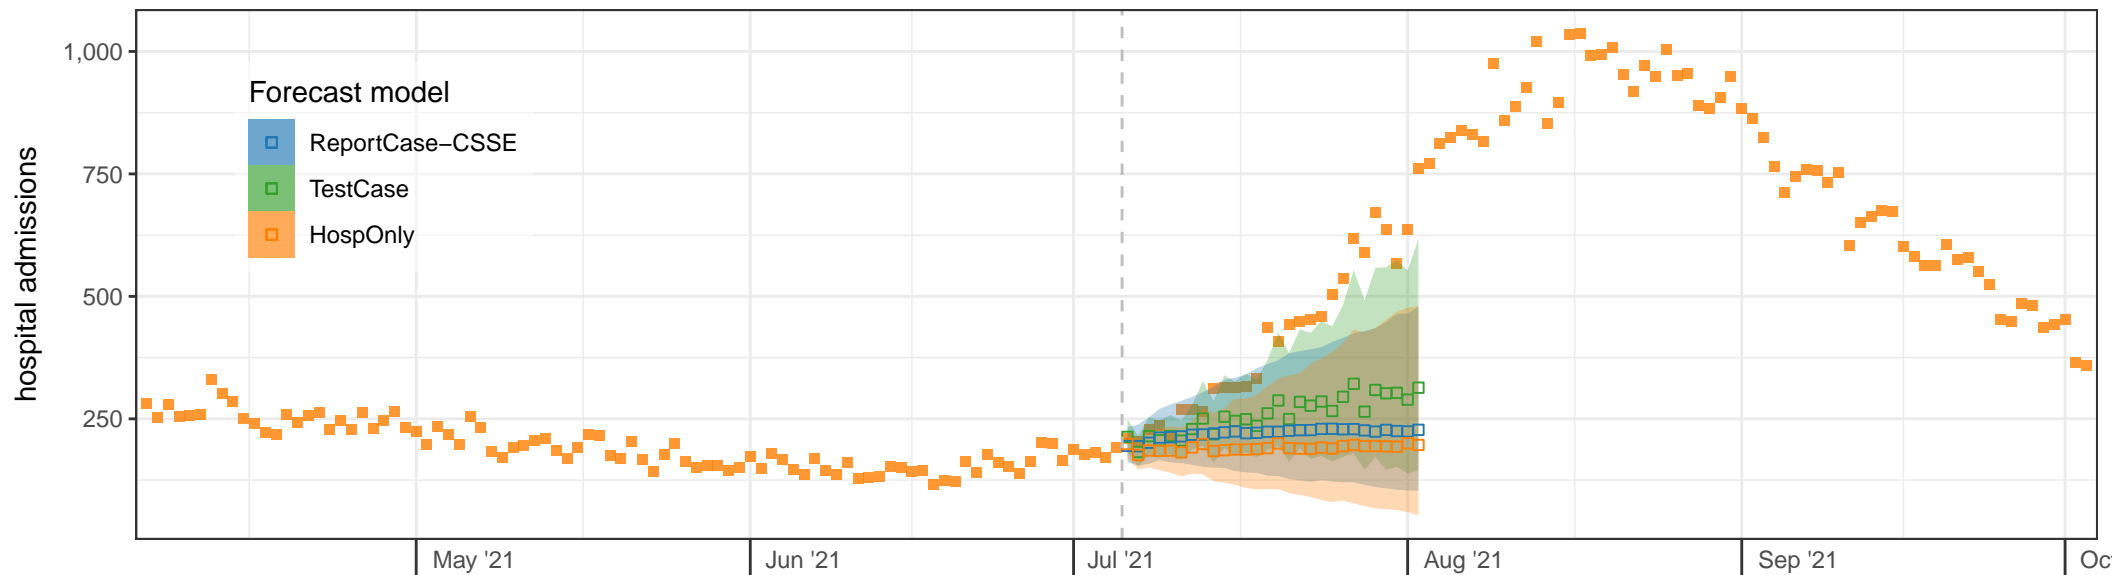

California case data and forecasts: 2021-07-12

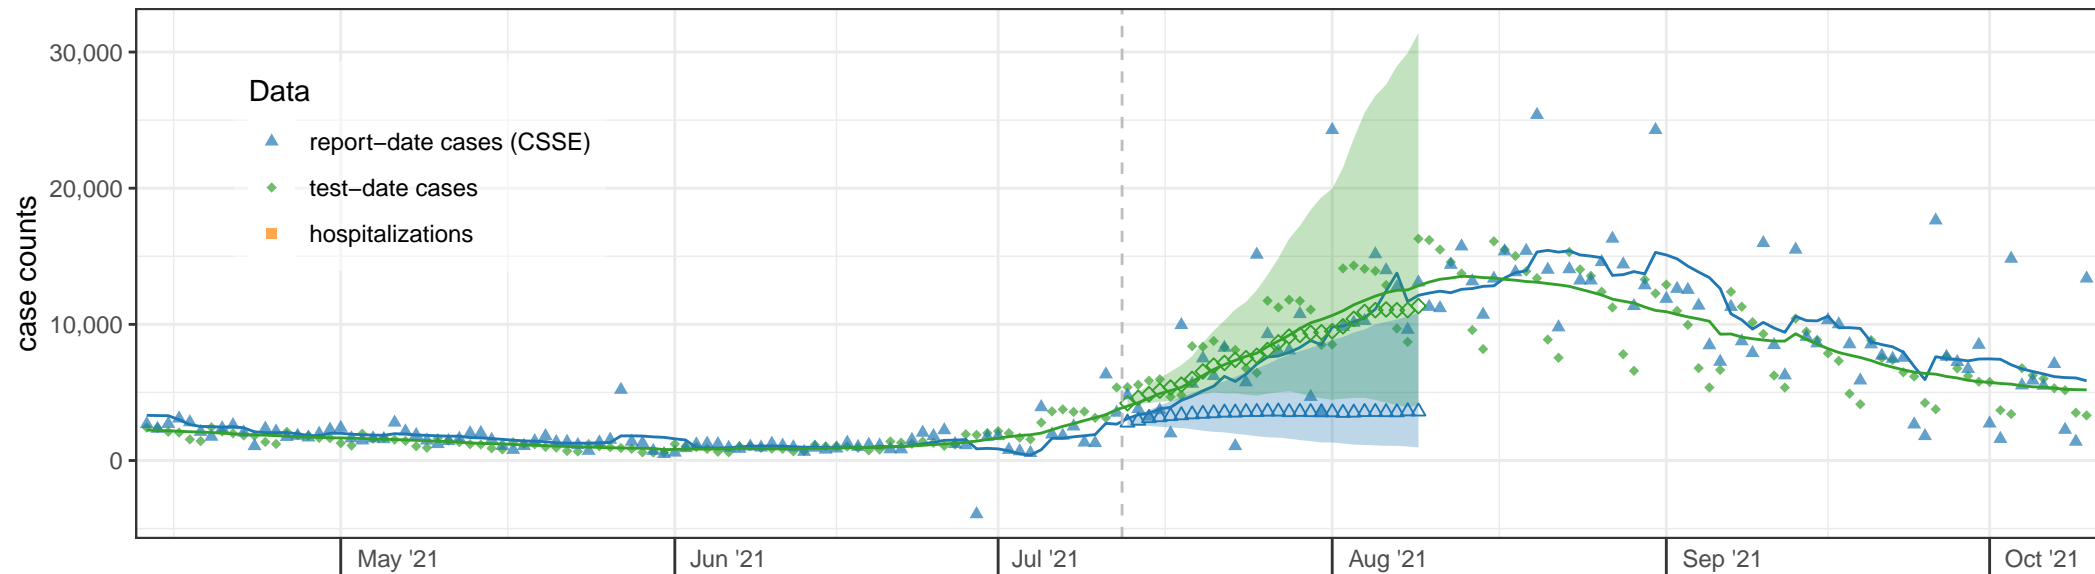

California hospitalization data and forecasts: 2021-07-12

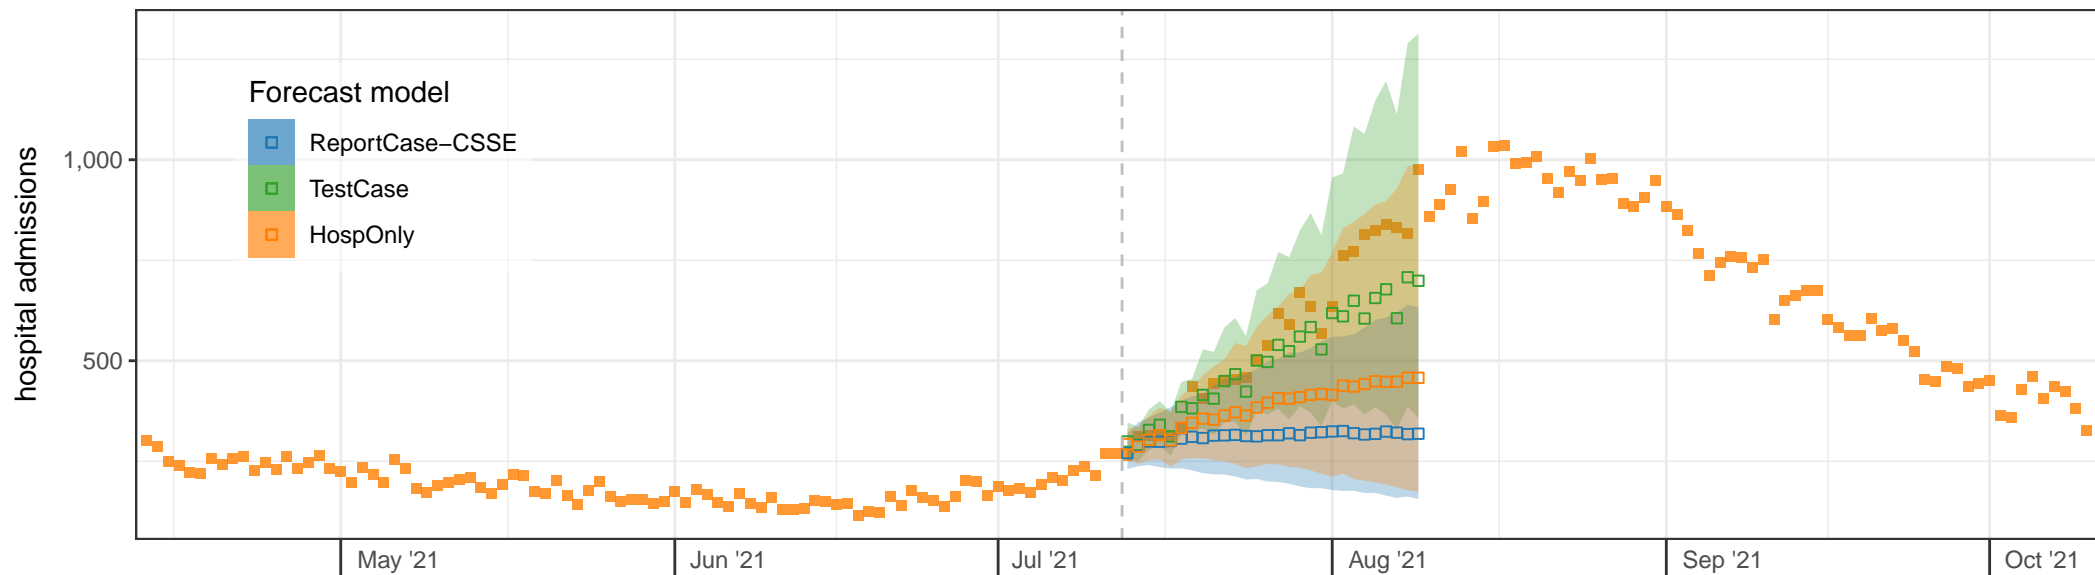



California case data and forecasts: 2021-07-19

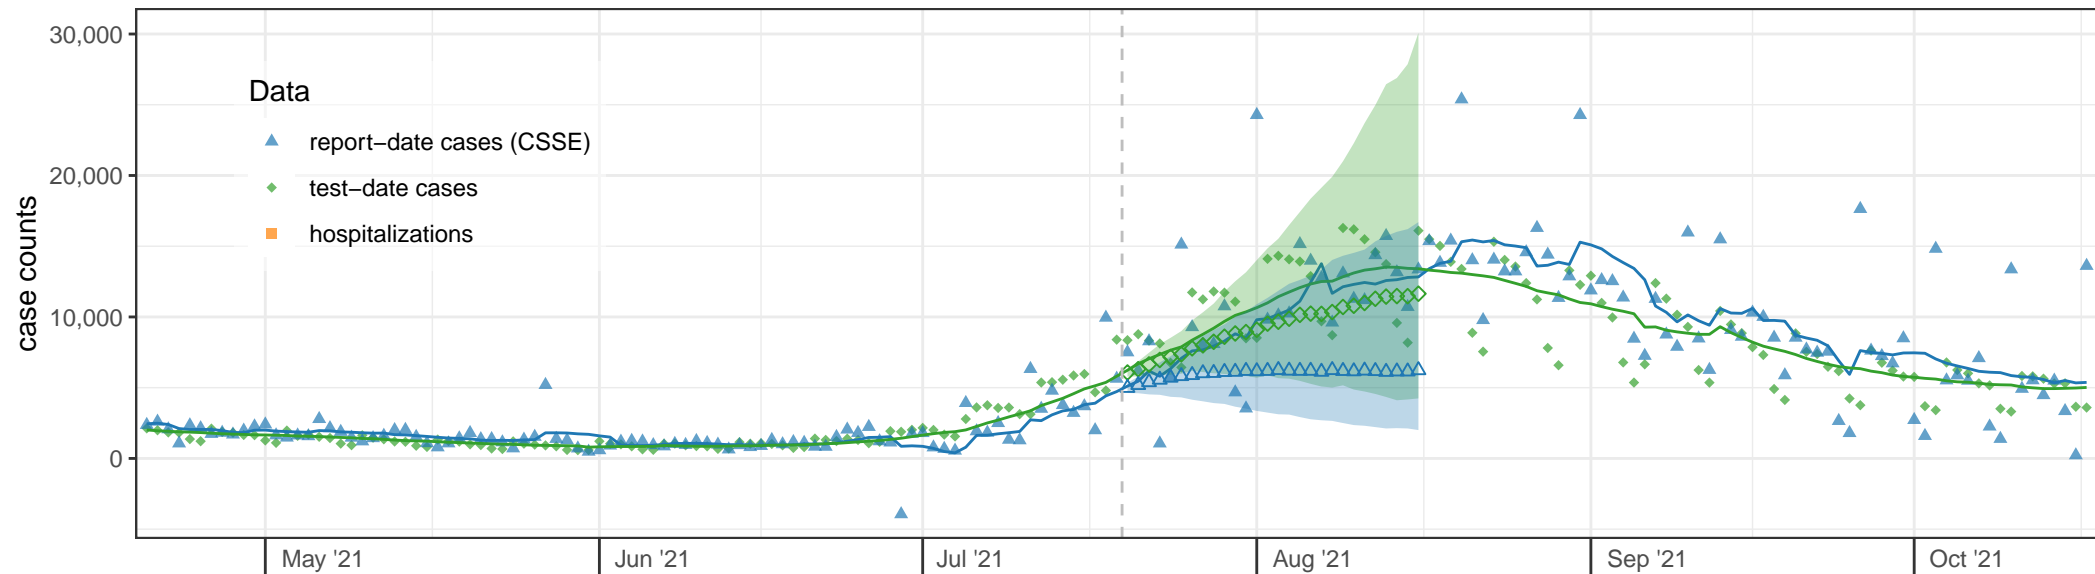

California hospitalization data and forecasts: 2021-07-19

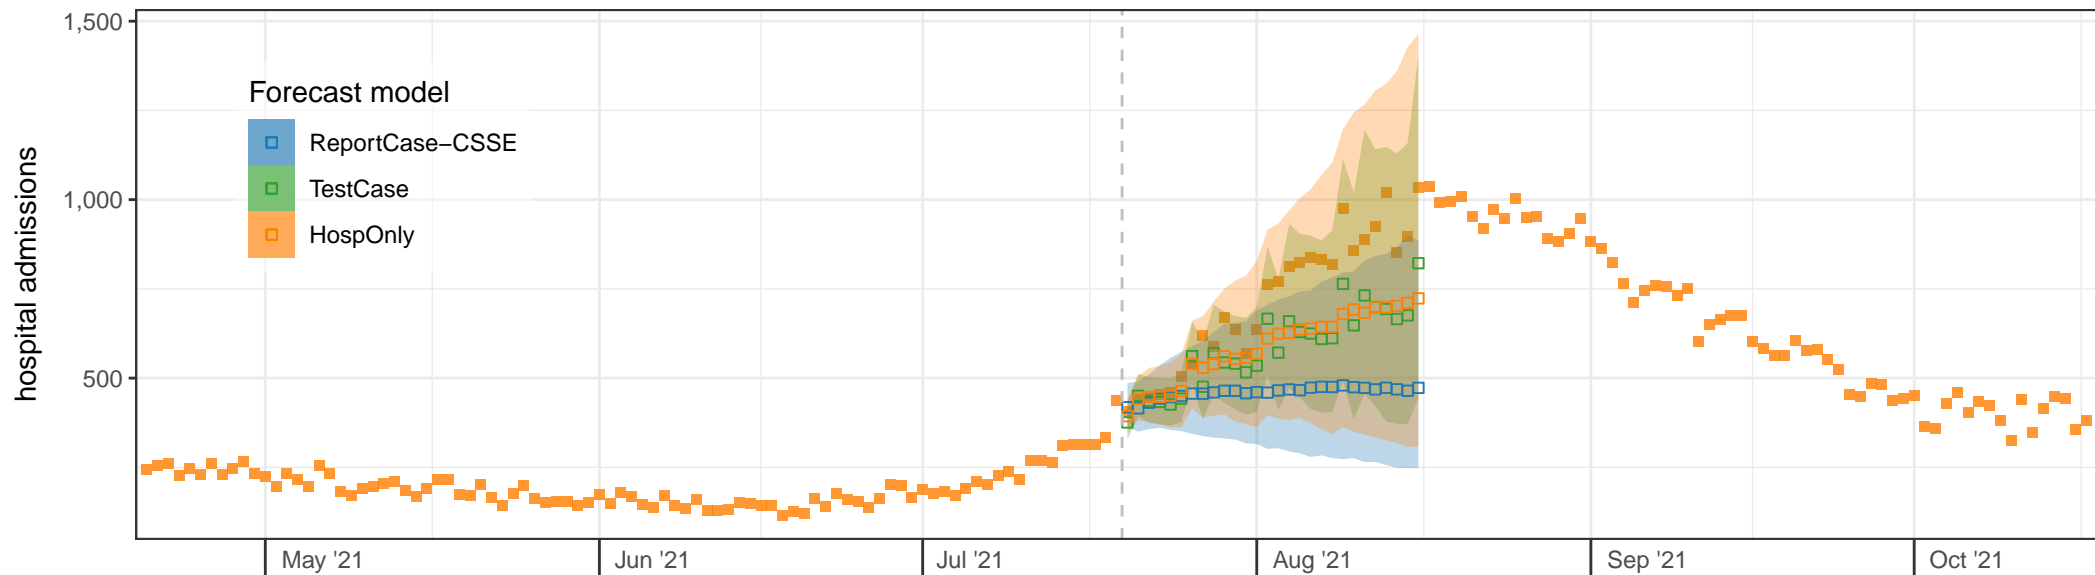

California case data and forecasts: 2021-07-26

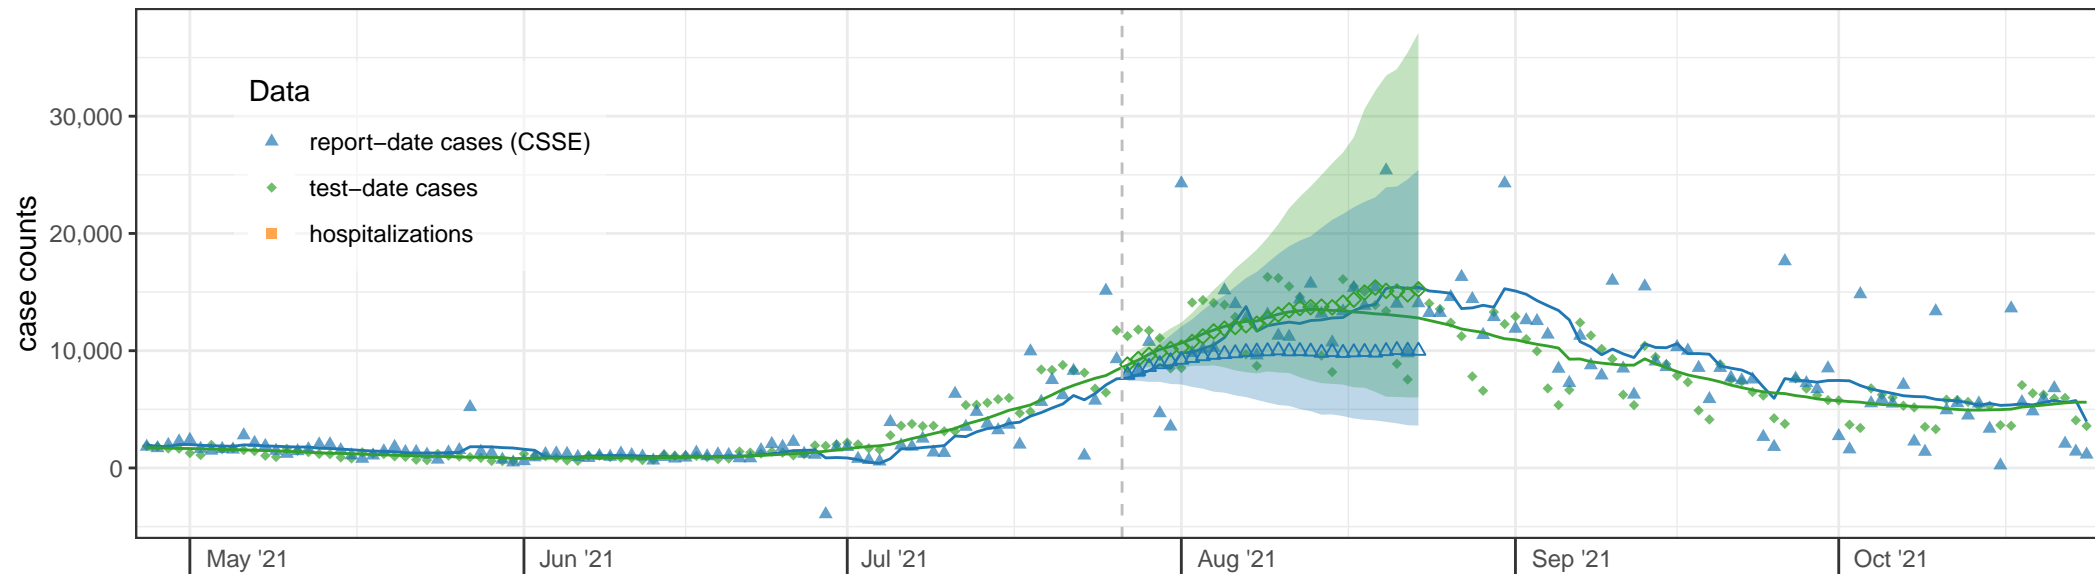

California hospitalization data and forecasts: 2021-07-26

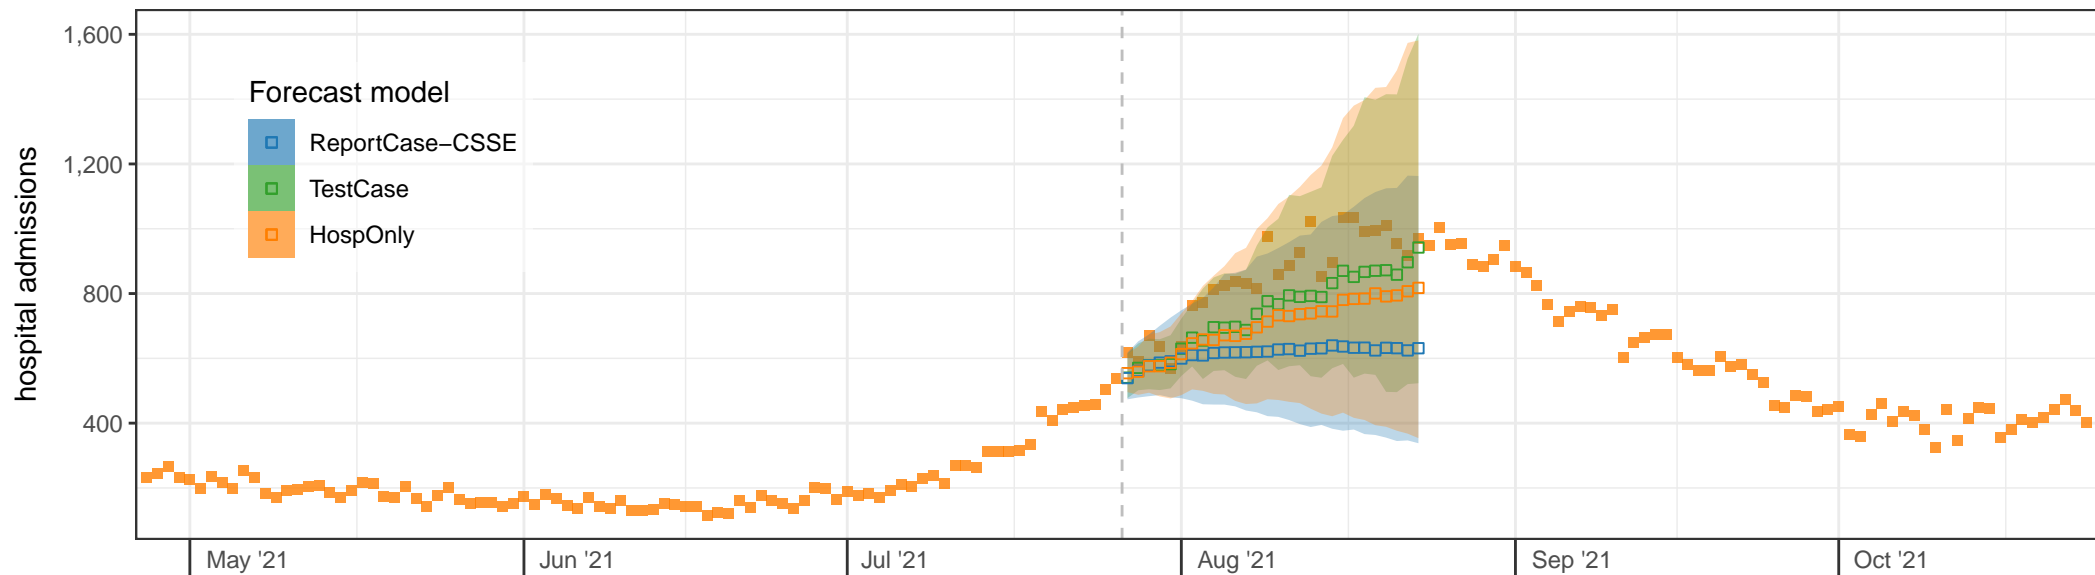

California case data and forecasts: 2021-08-02

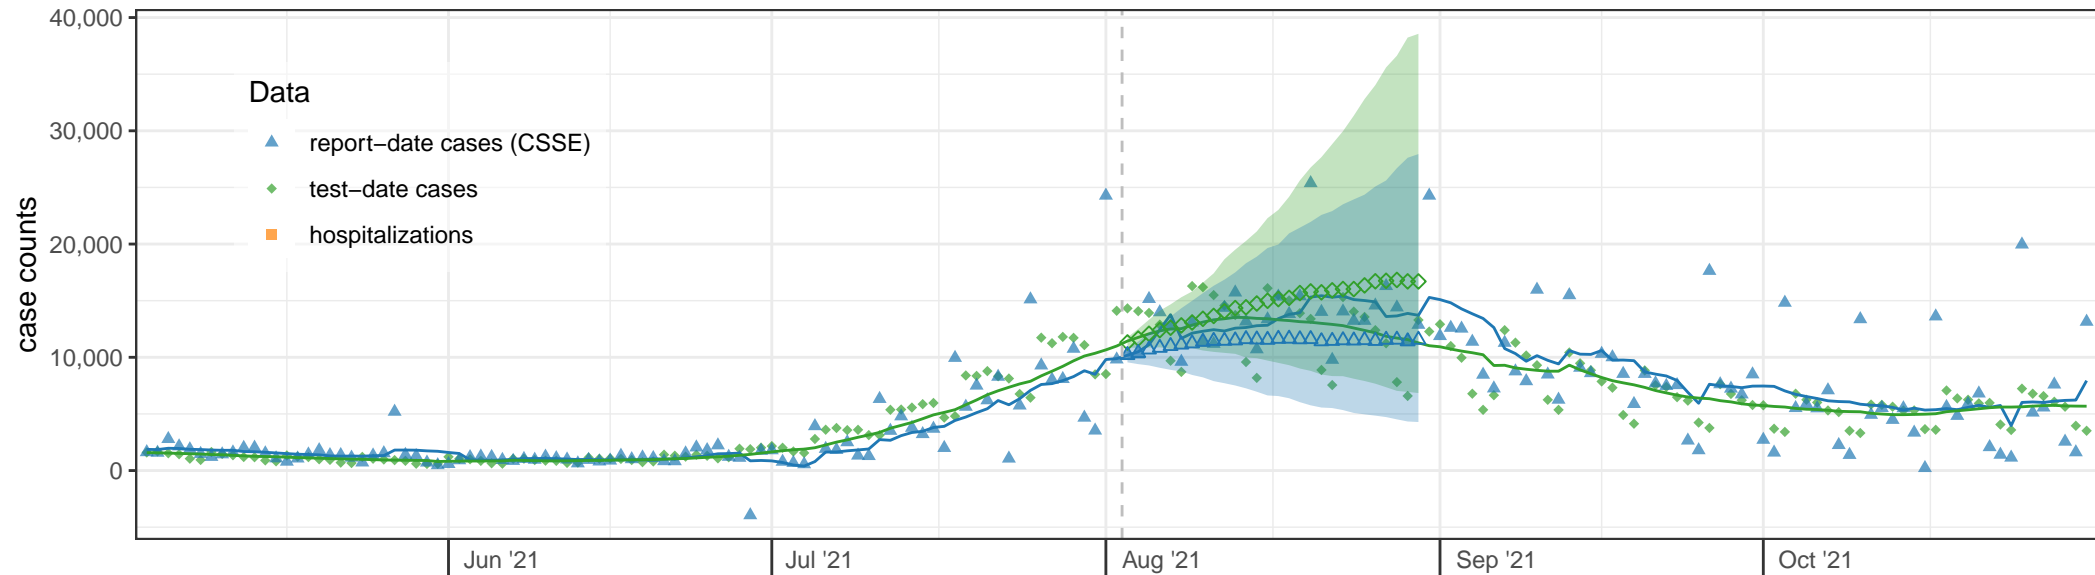

California hospitalization data and forecasts: 2021-08-02

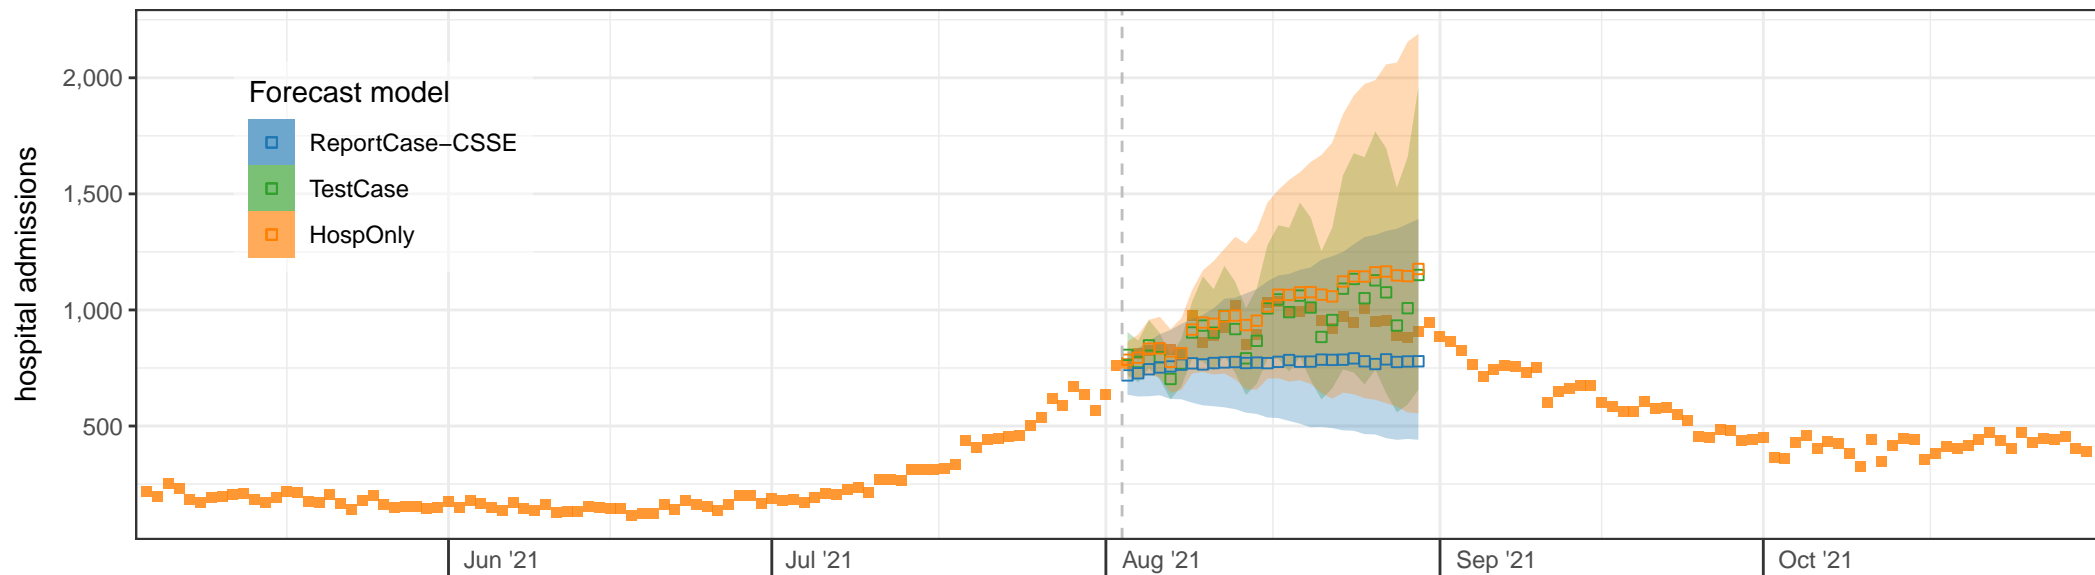

California case data and forecasts: 2021-08-09

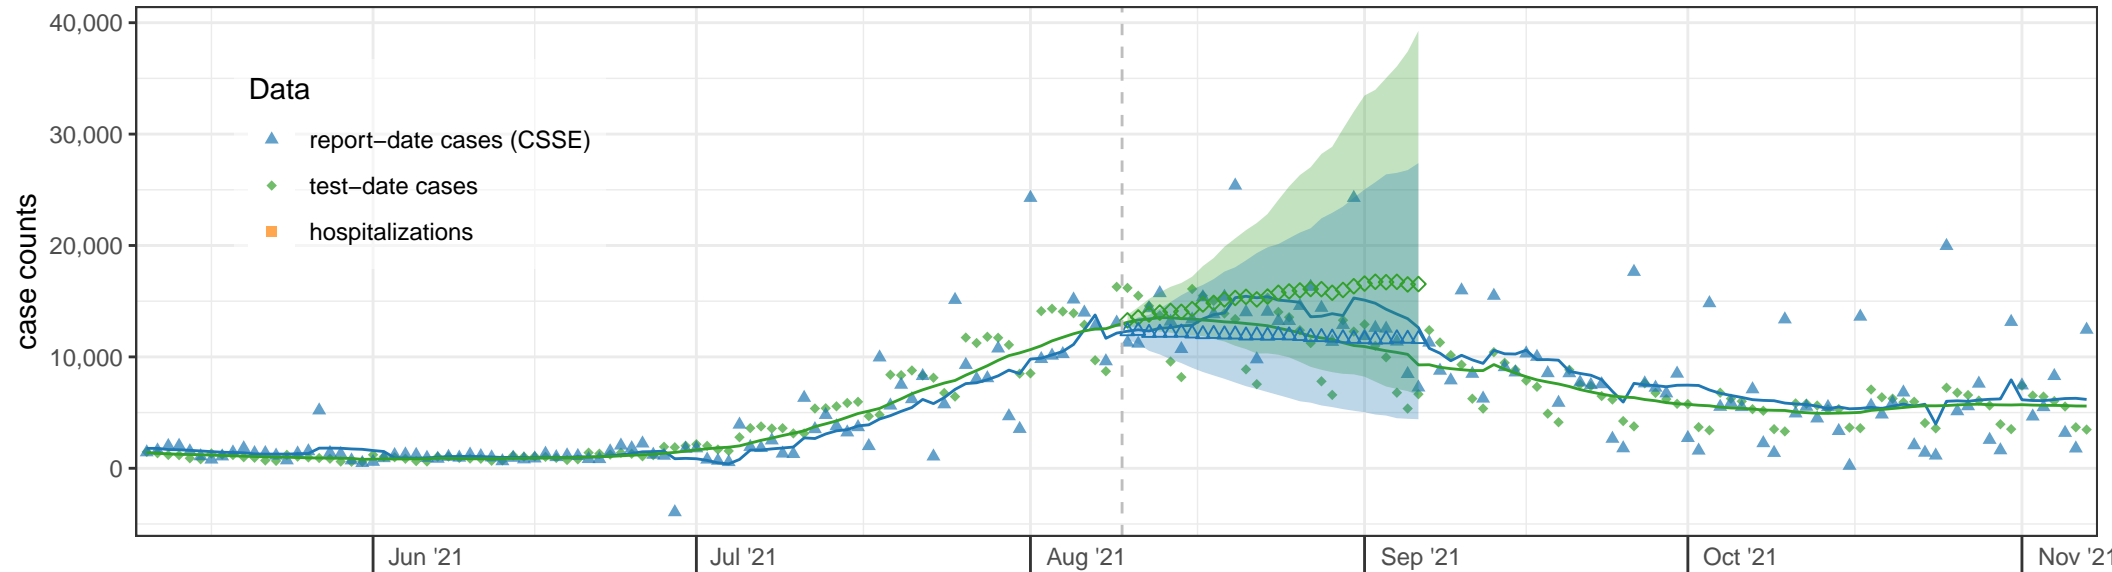

California hospitalization data and forecasts: 2021-08-09

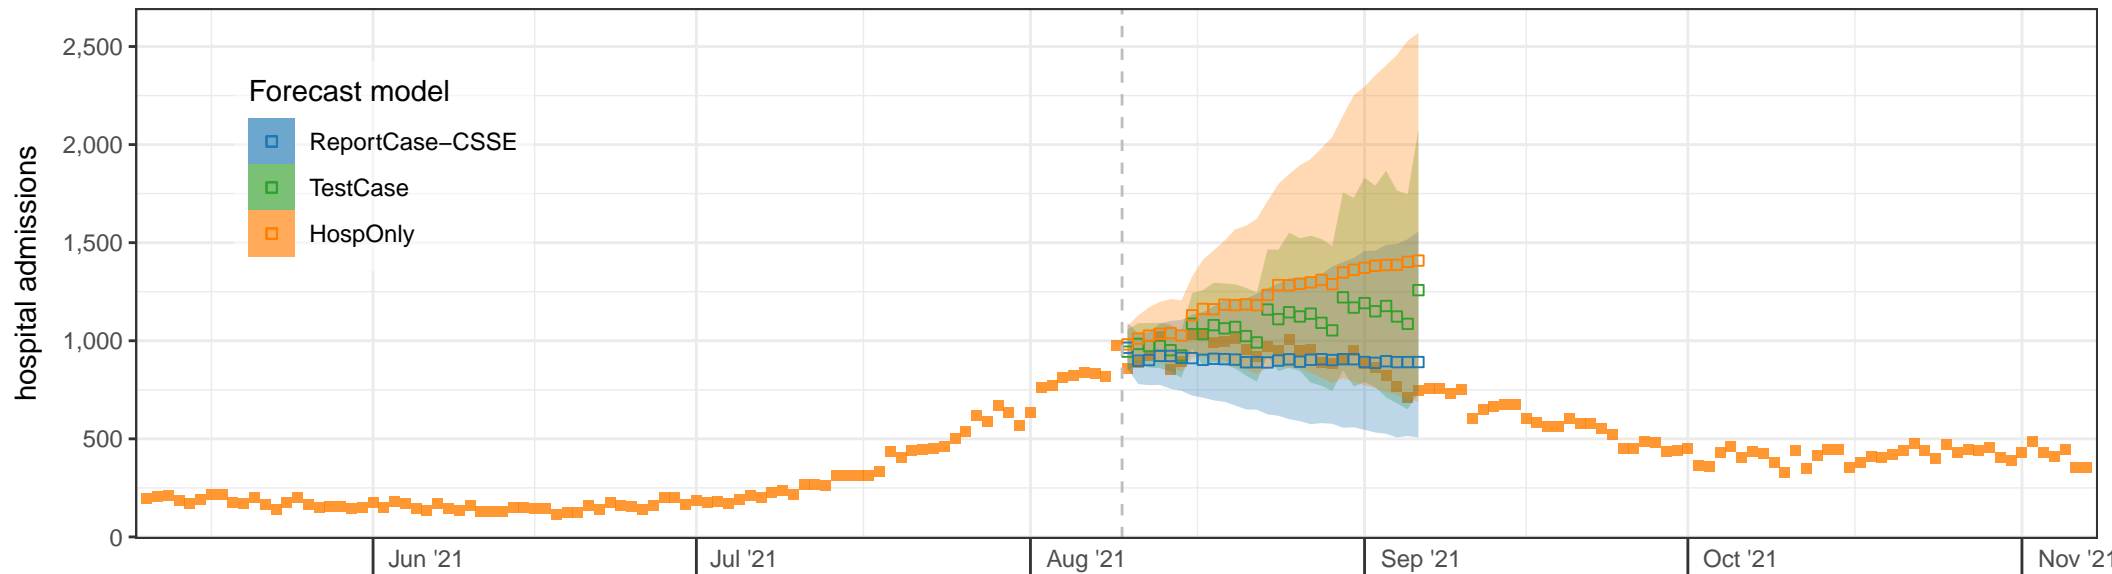

California case data and forecasts: 2021-08-16

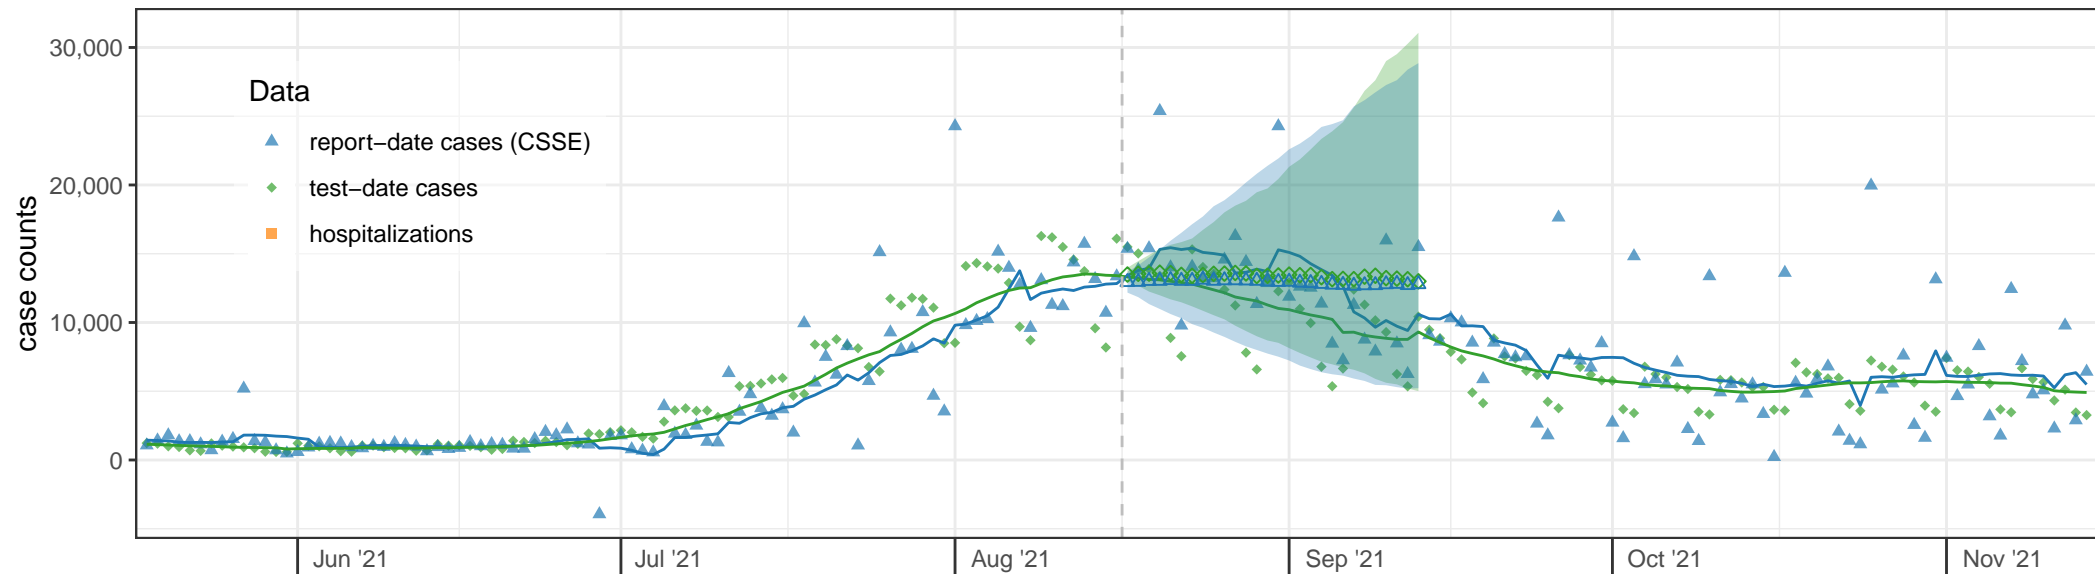

California hospitalization data and forecasts: 2021-08-16

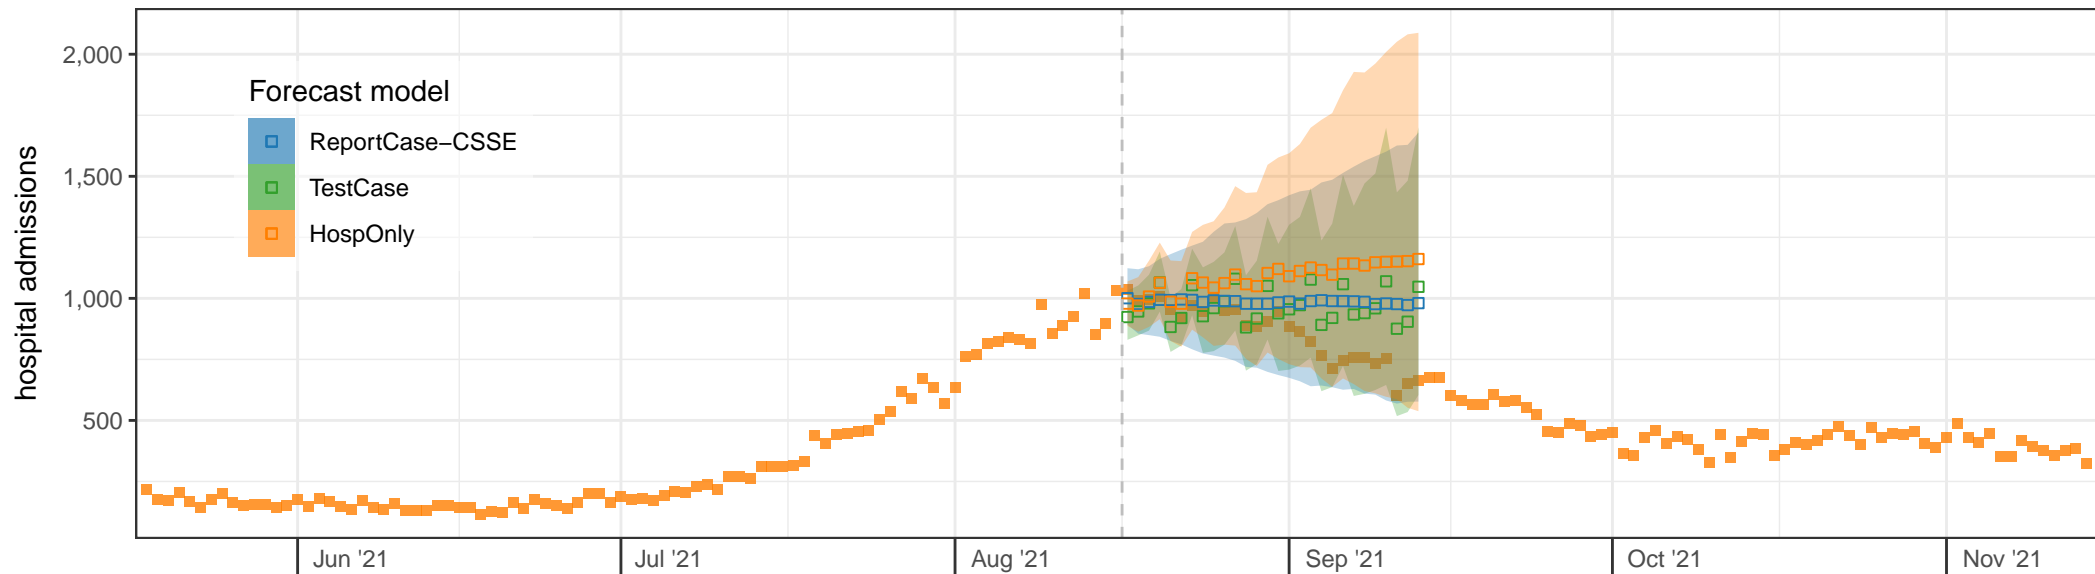

California case data and forecasts: 2021-08-23

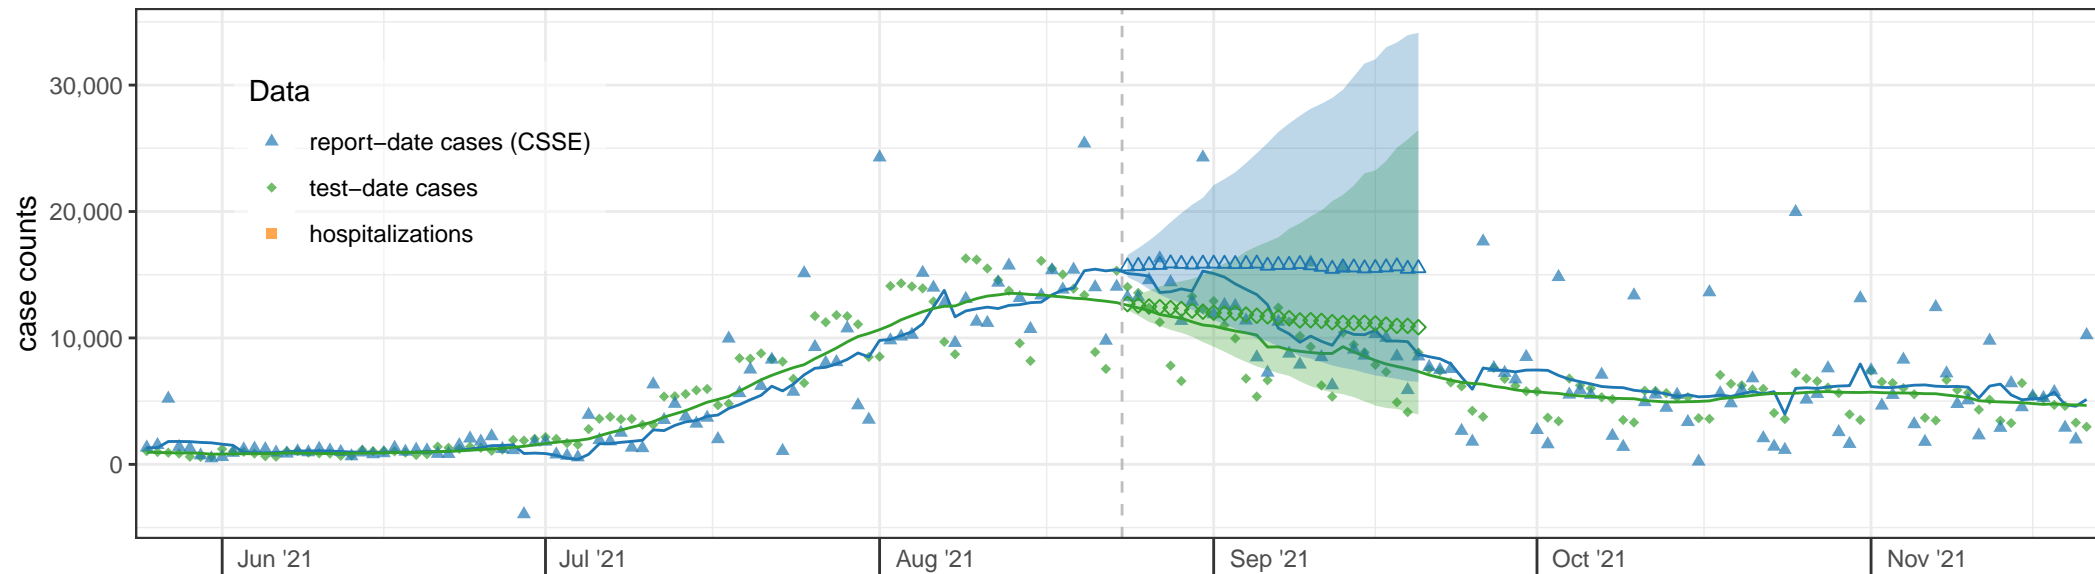

California hospitalization data and forecasts: 2021-08-23

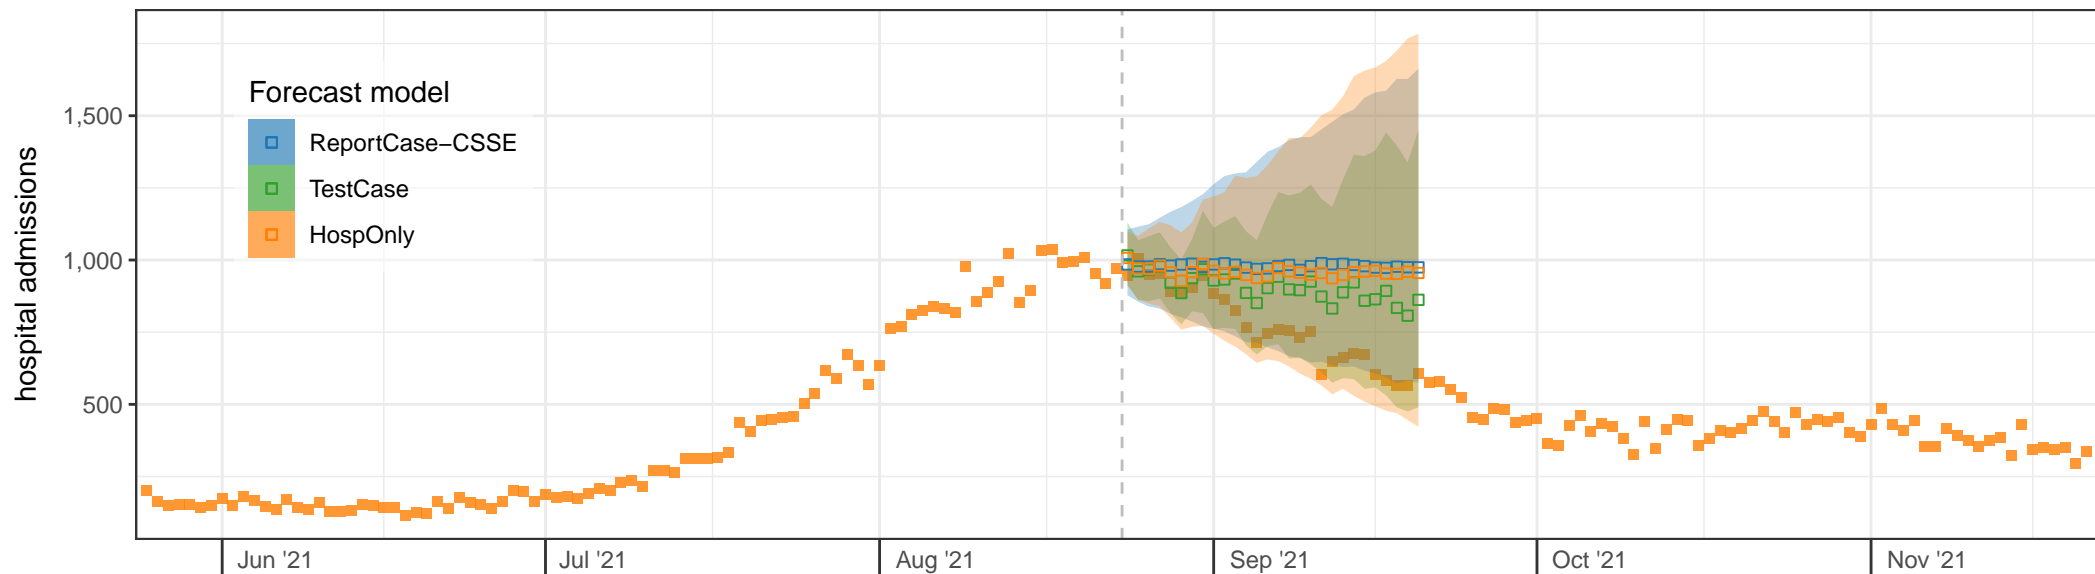

California case data and forecasts: 2021-08-30

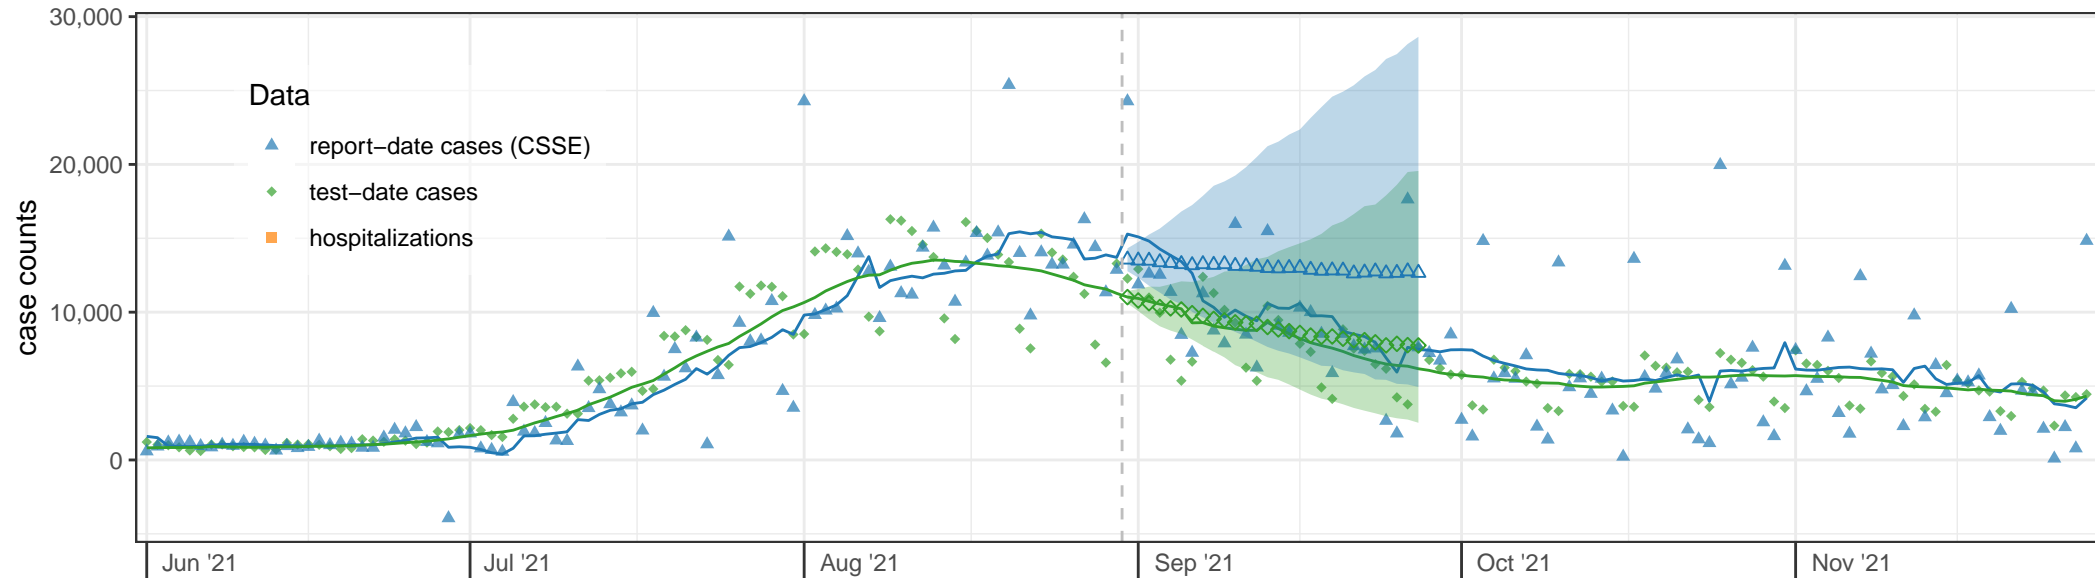

California hospitalization data and forecasts: 2021-08-30

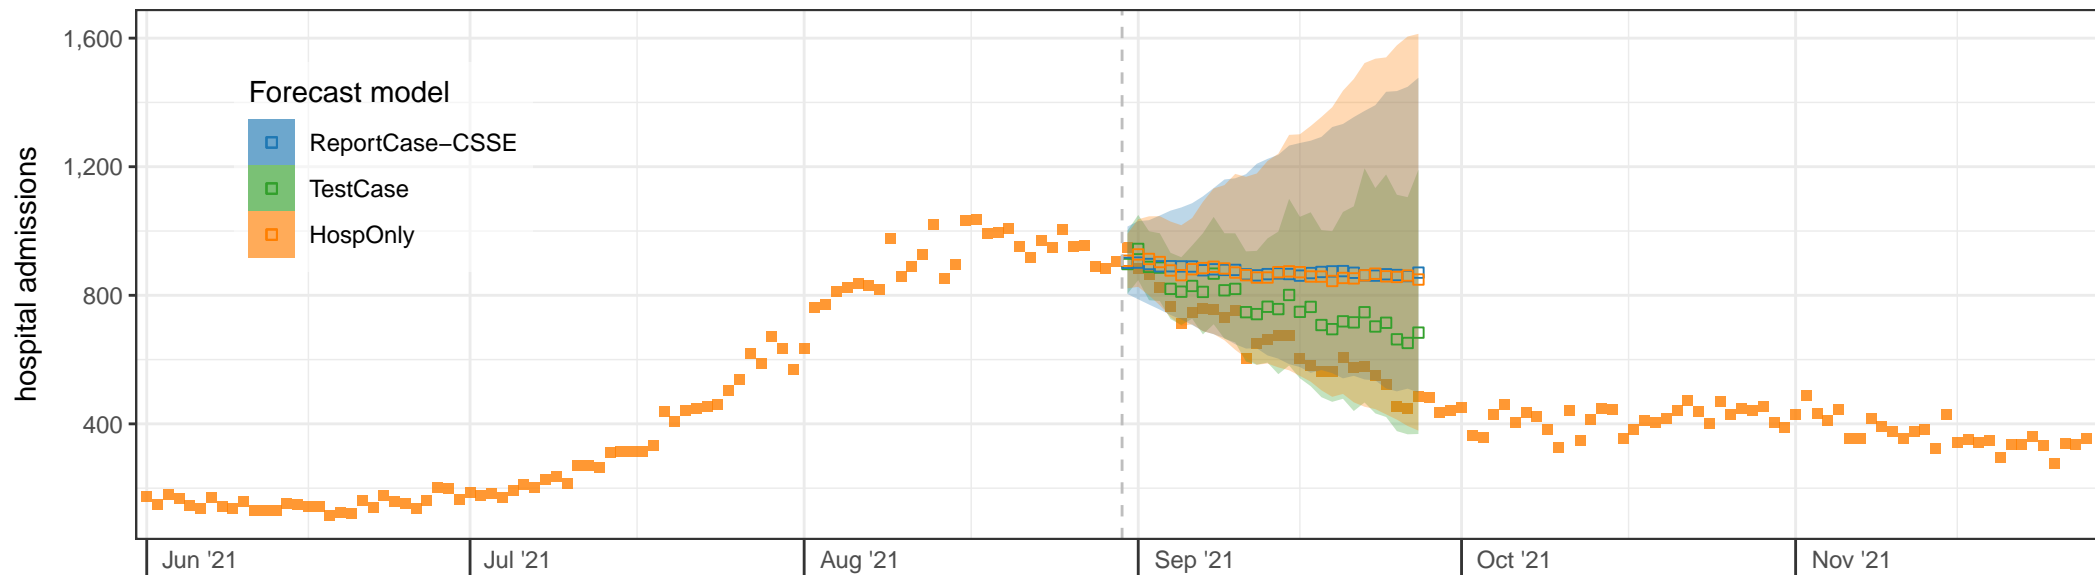

California case data and forecasts: 2021-09-06

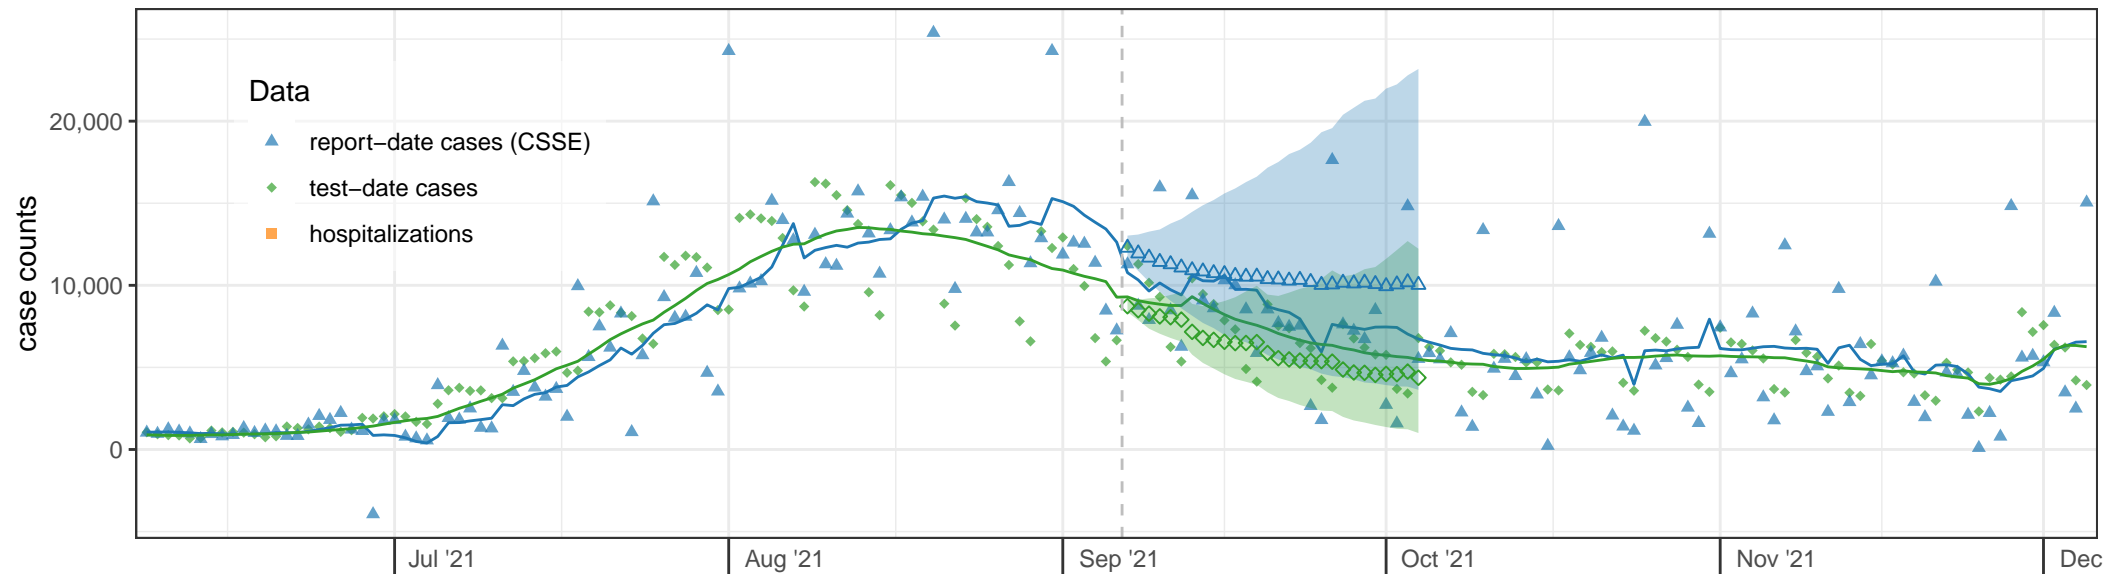

California hospitalization data and forecasts: 2021-09-06

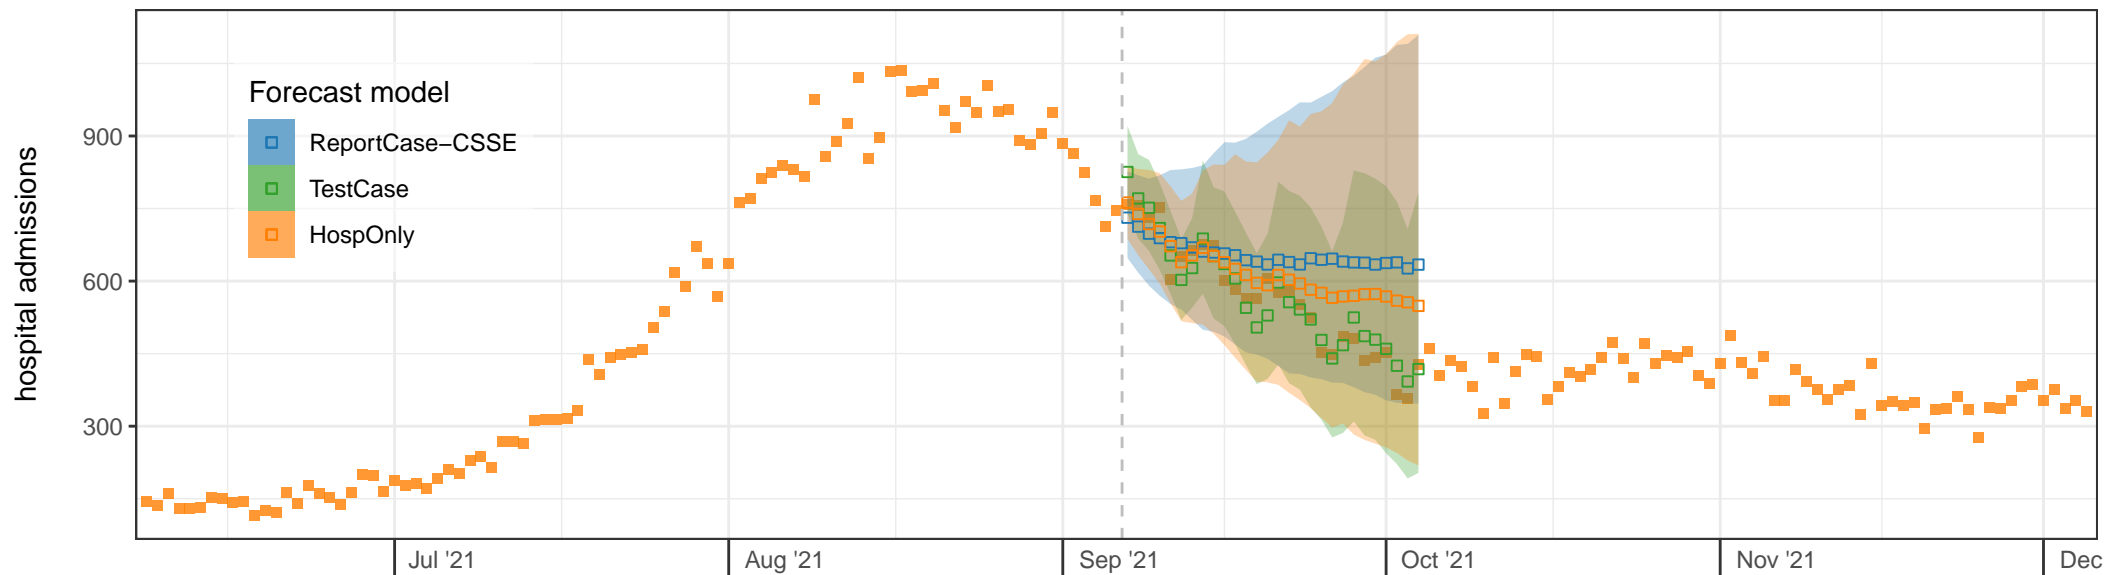



California case data and forecasts: 2021-09-13

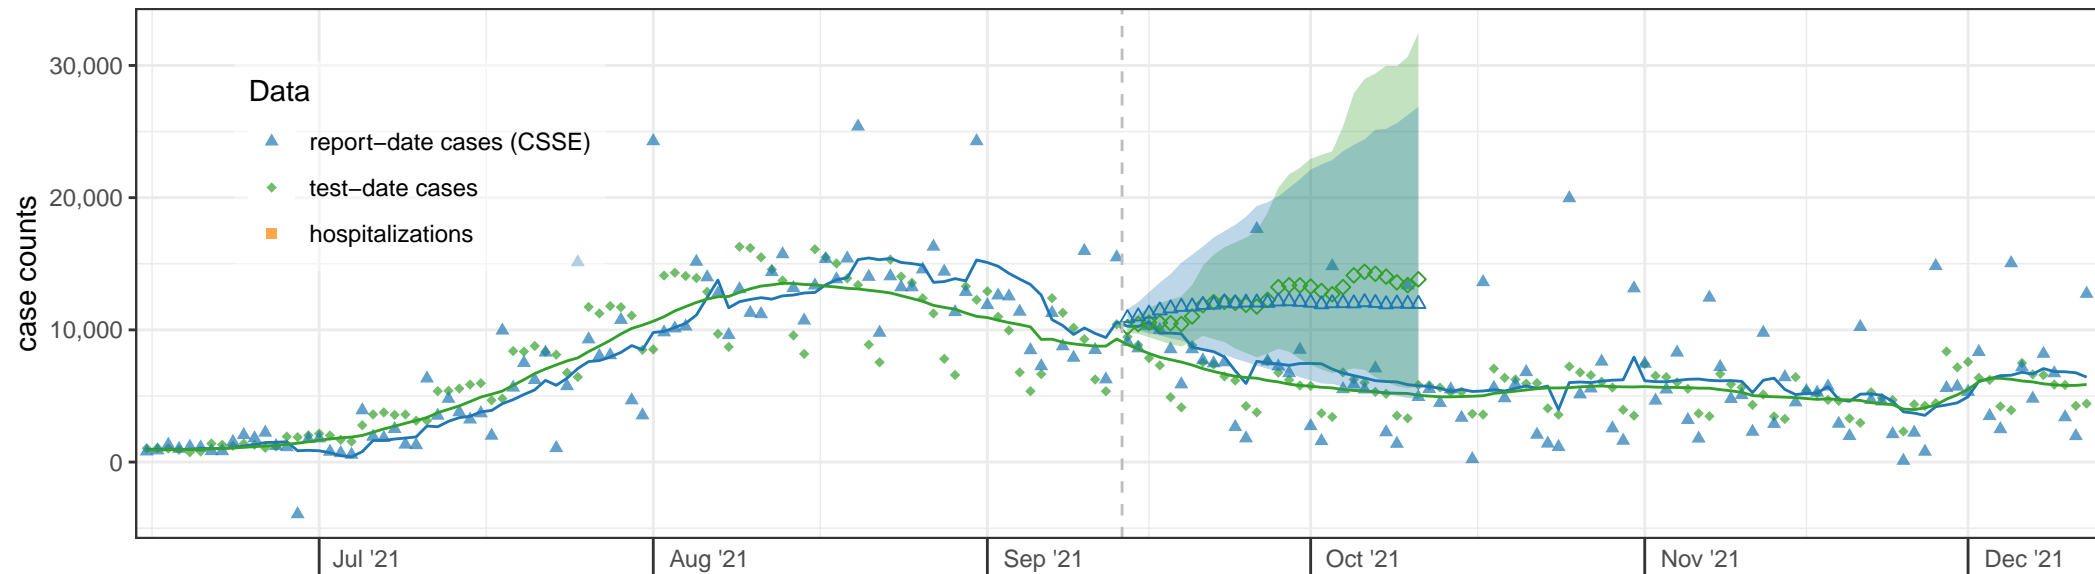

California hospitalization data and forecasts: 2021-09-13

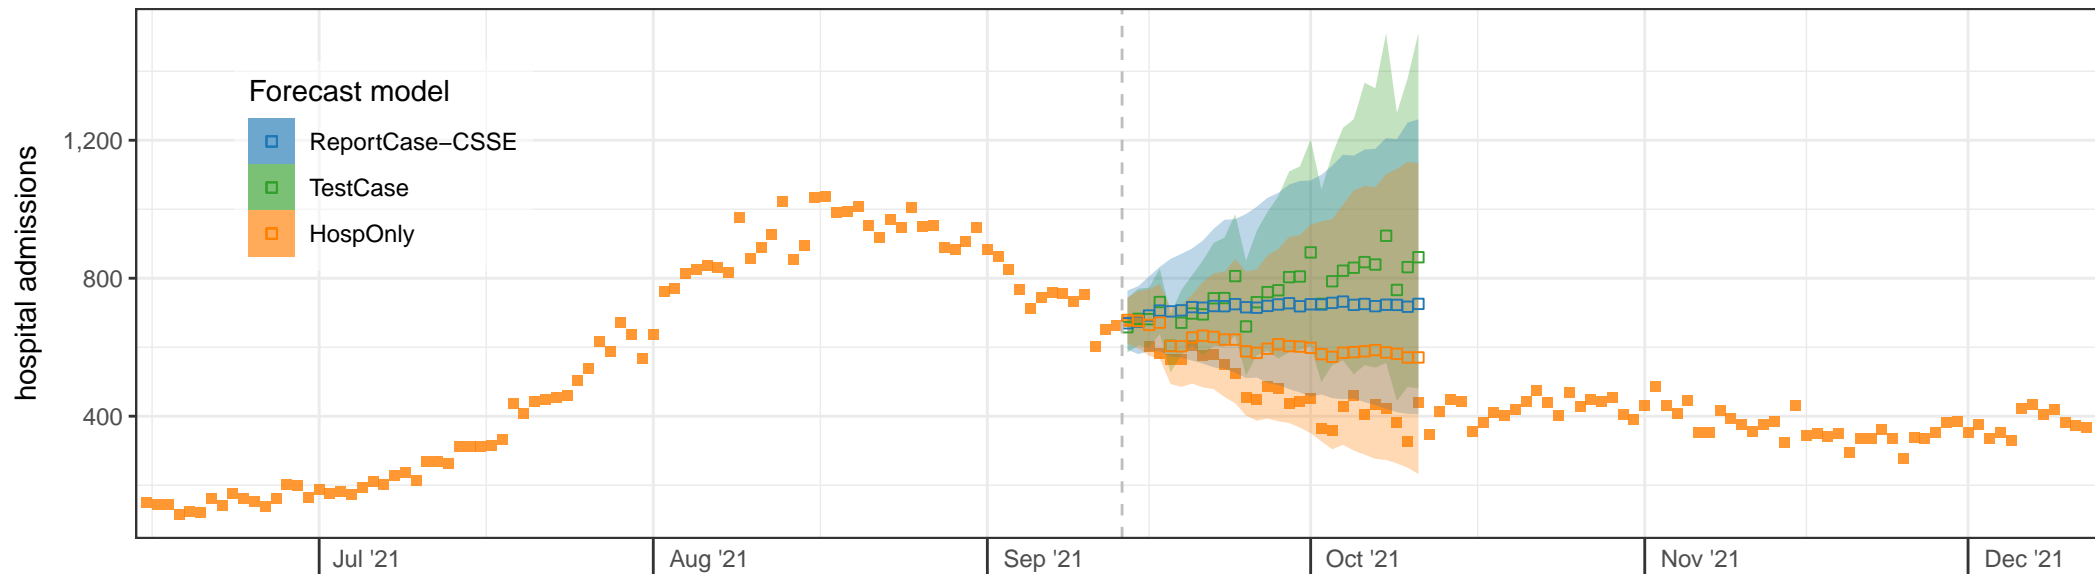

California case data and forecasts: 2021-09-20

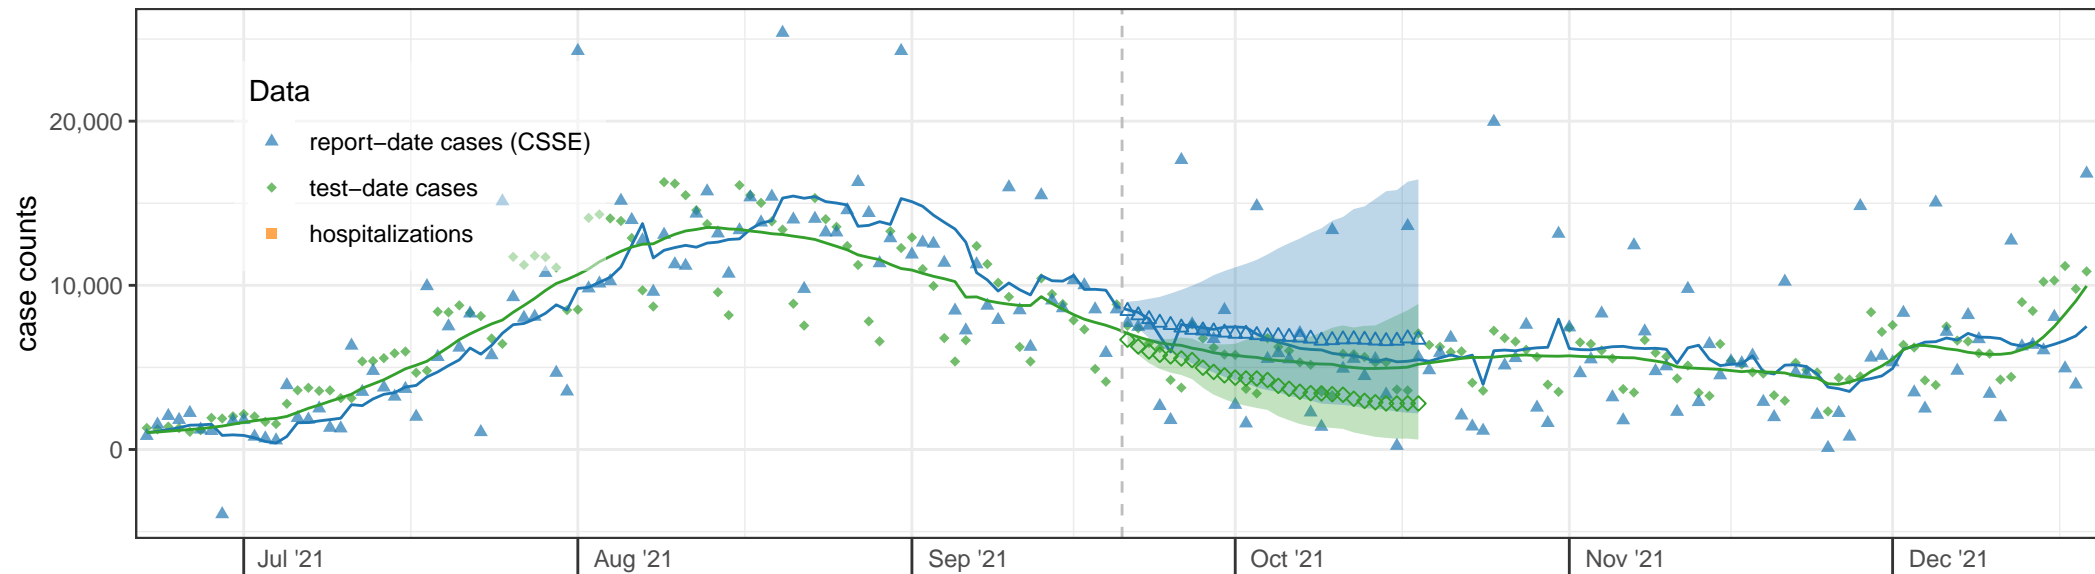

California hospitalization data and forecasts: 2021-09-20

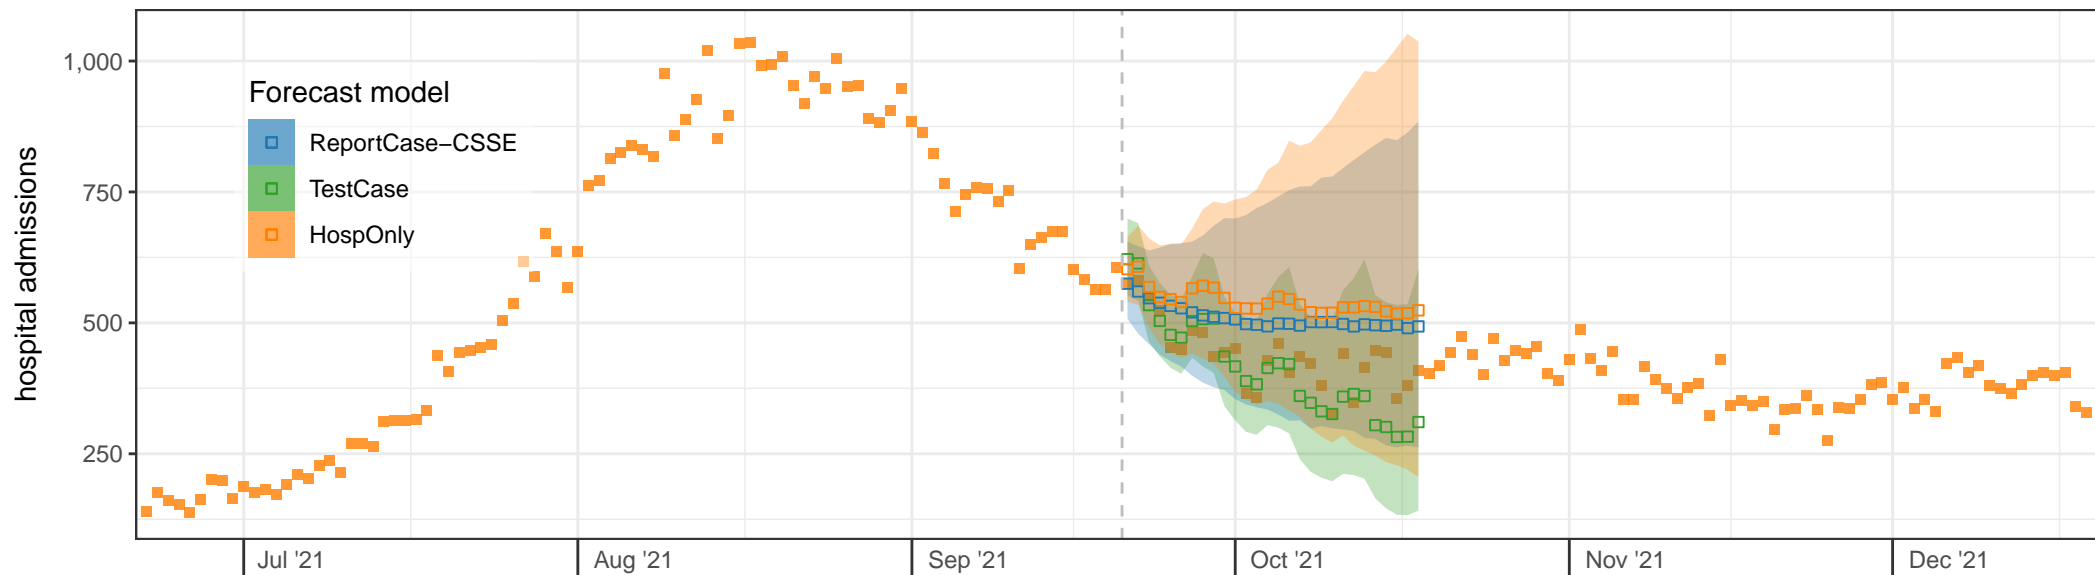

California case data and forecasts: 2021-09-27

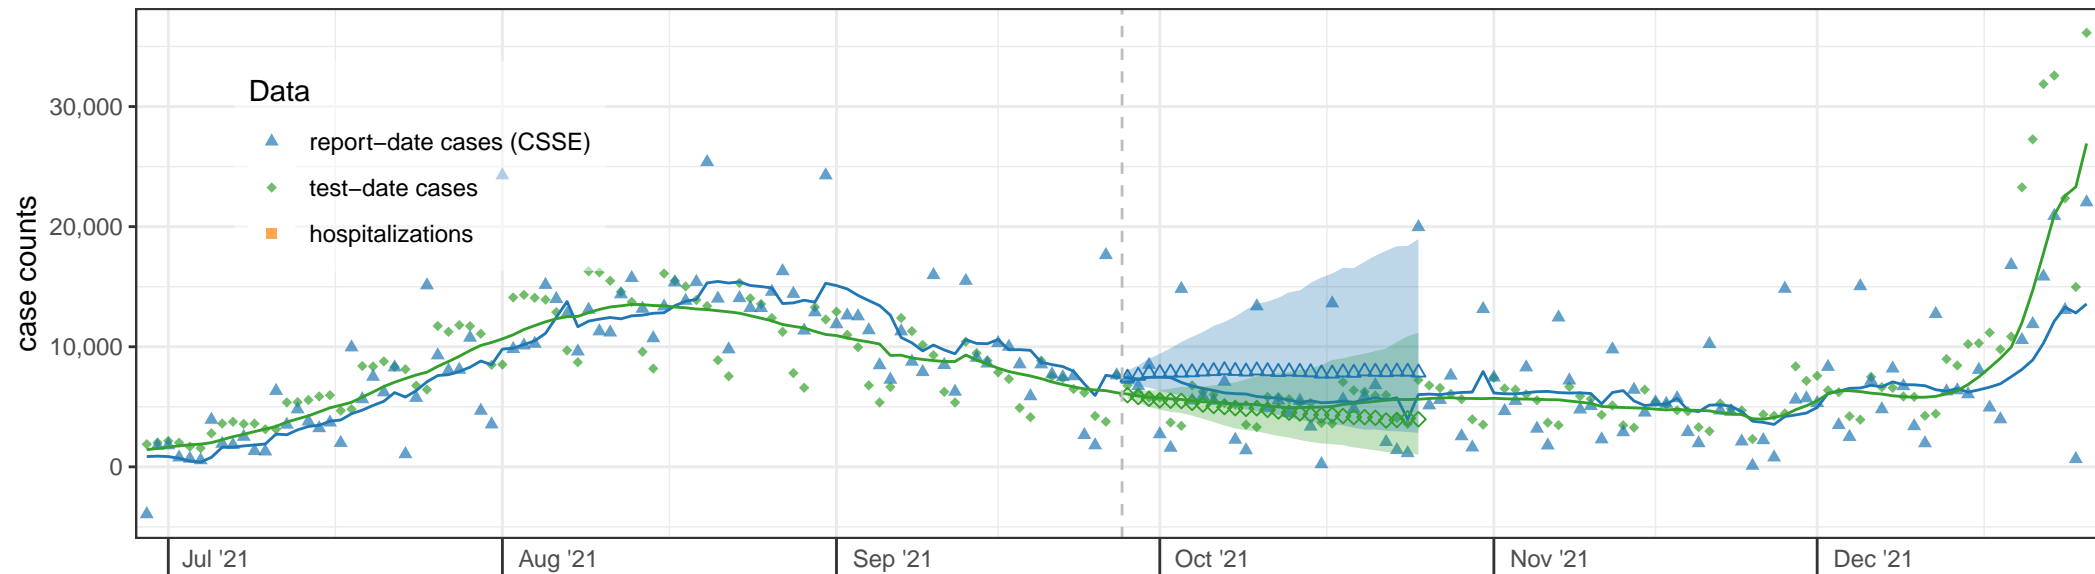

California hospitalization data and forecasts: 2021-09-27

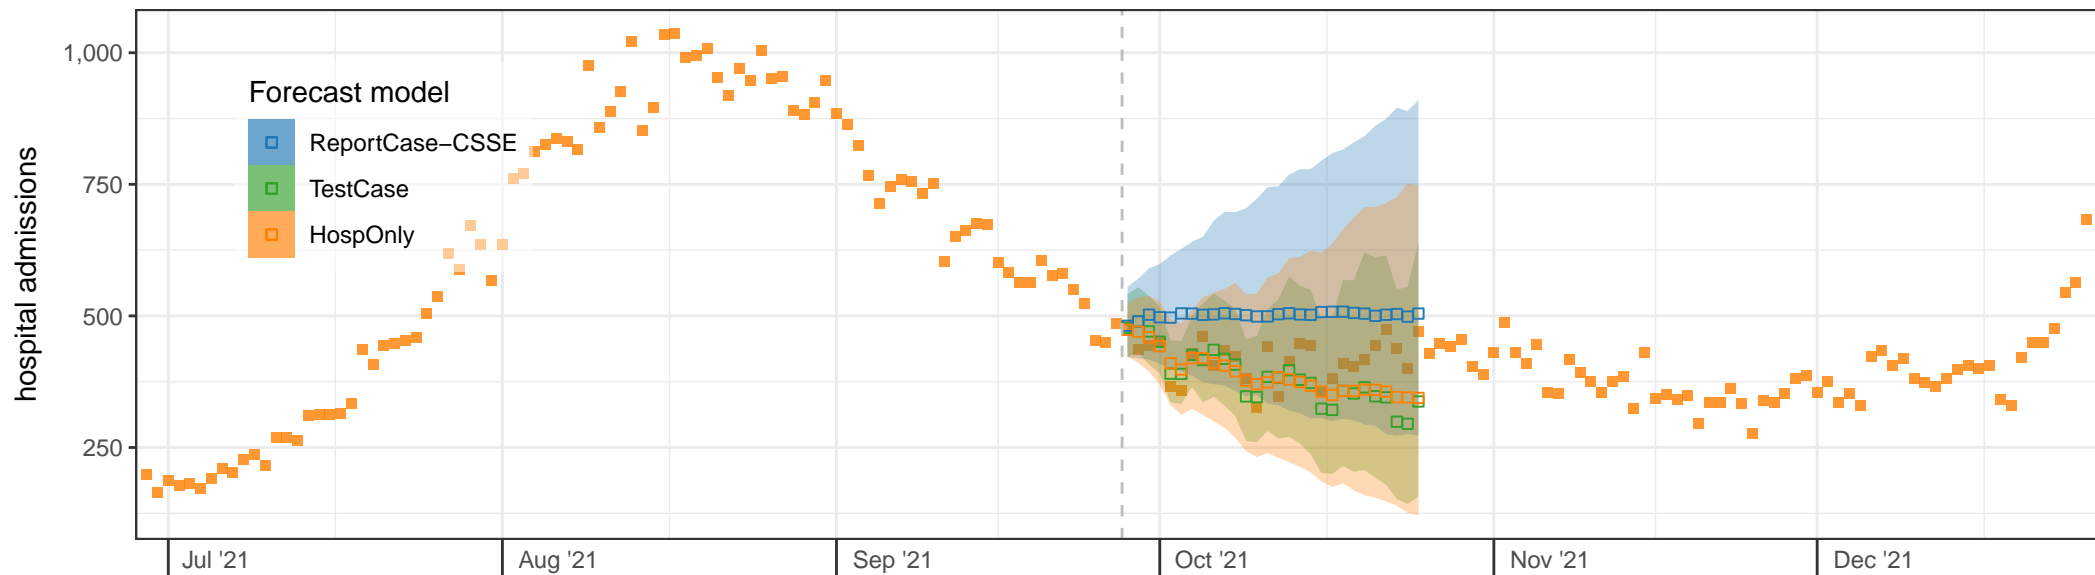

California case data and forecasts: 2021-10-04

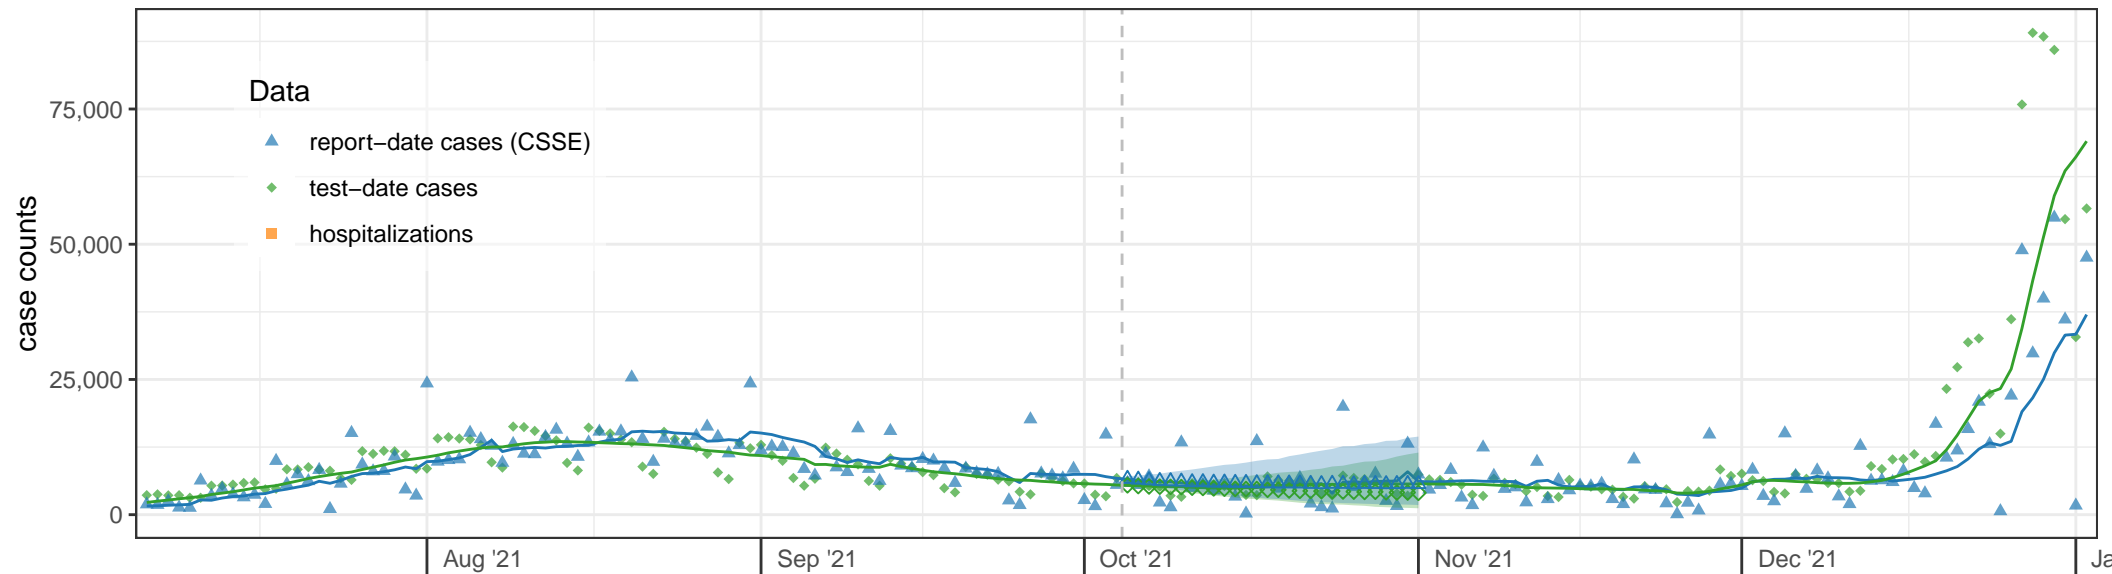

California hospitalization data and forecasts: 2021-10-04

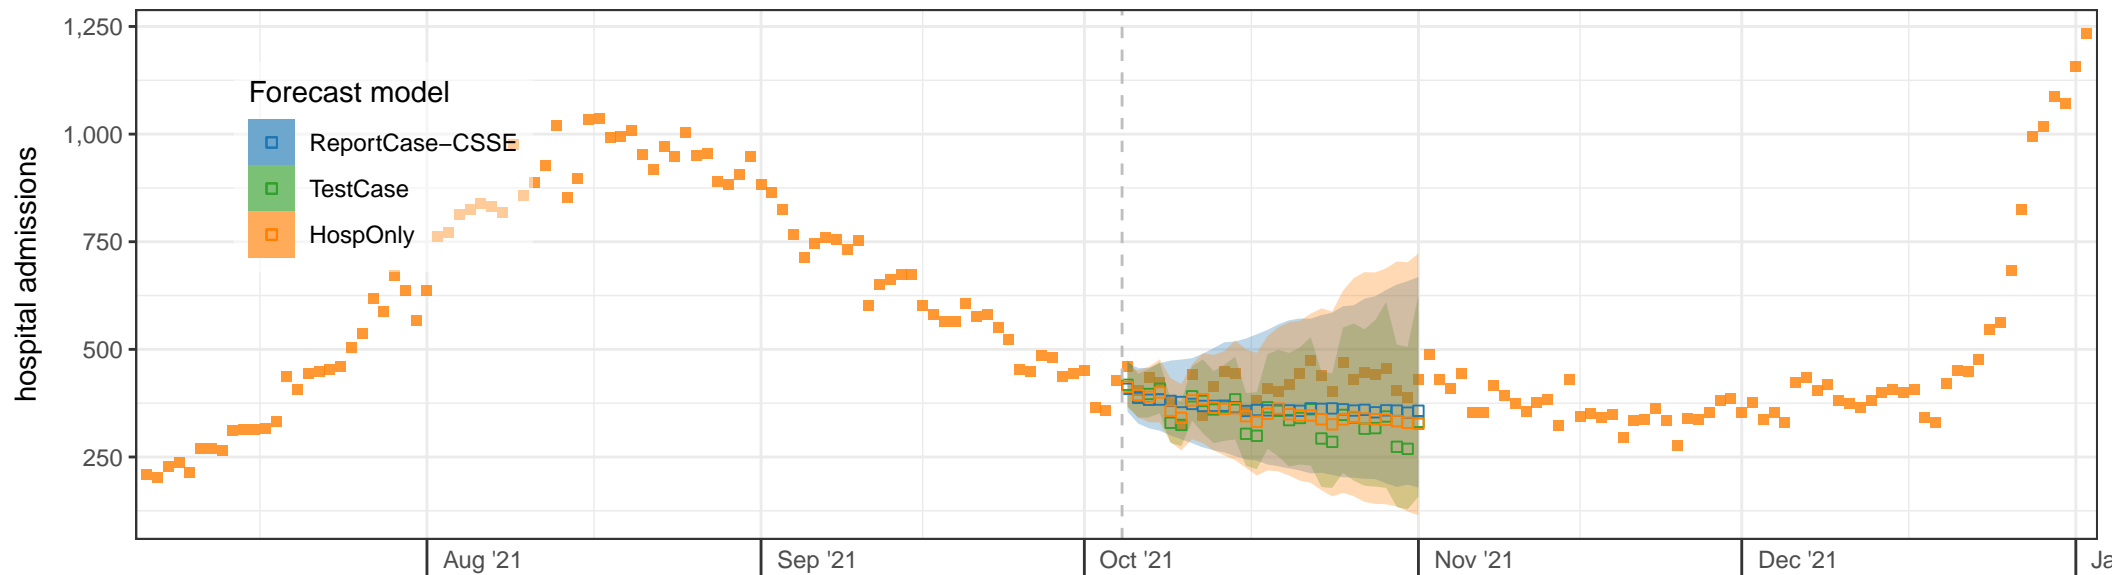

### California case data and forecasts: 2021-10-11

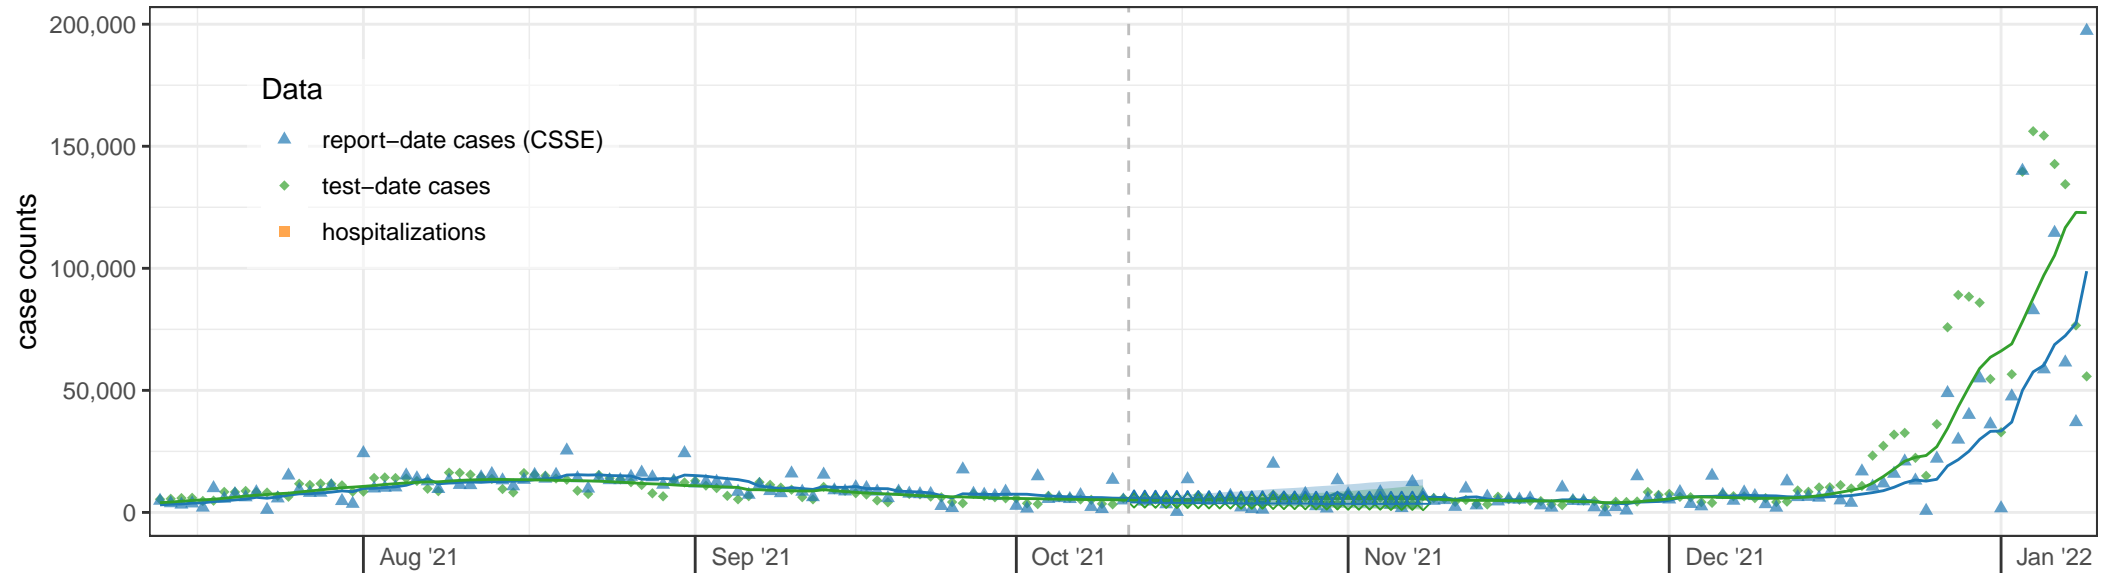

### California hospitalization data and forecasts: 2021-10-11

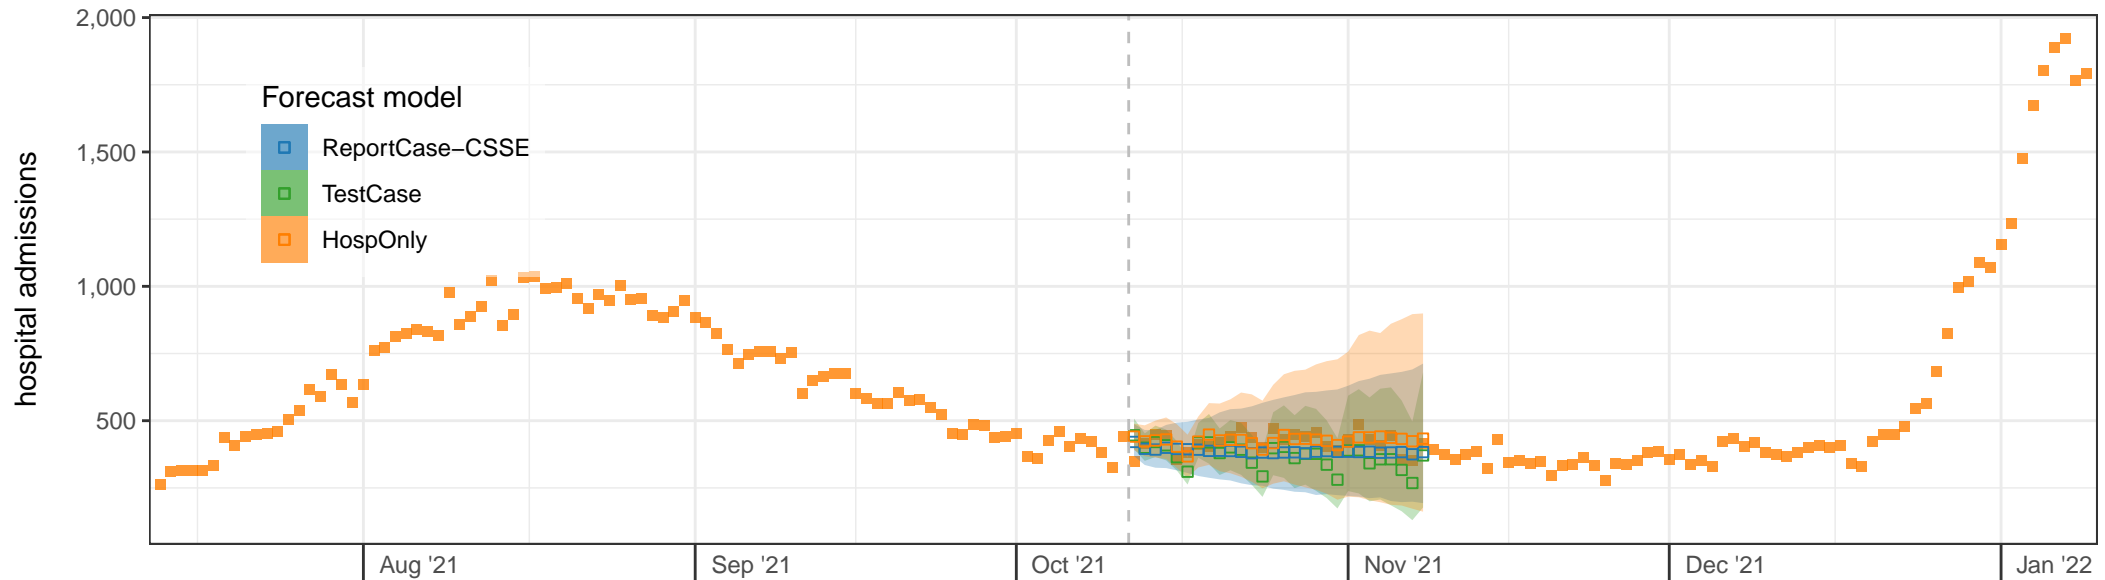

California case data and forecasts: 2021-10-18

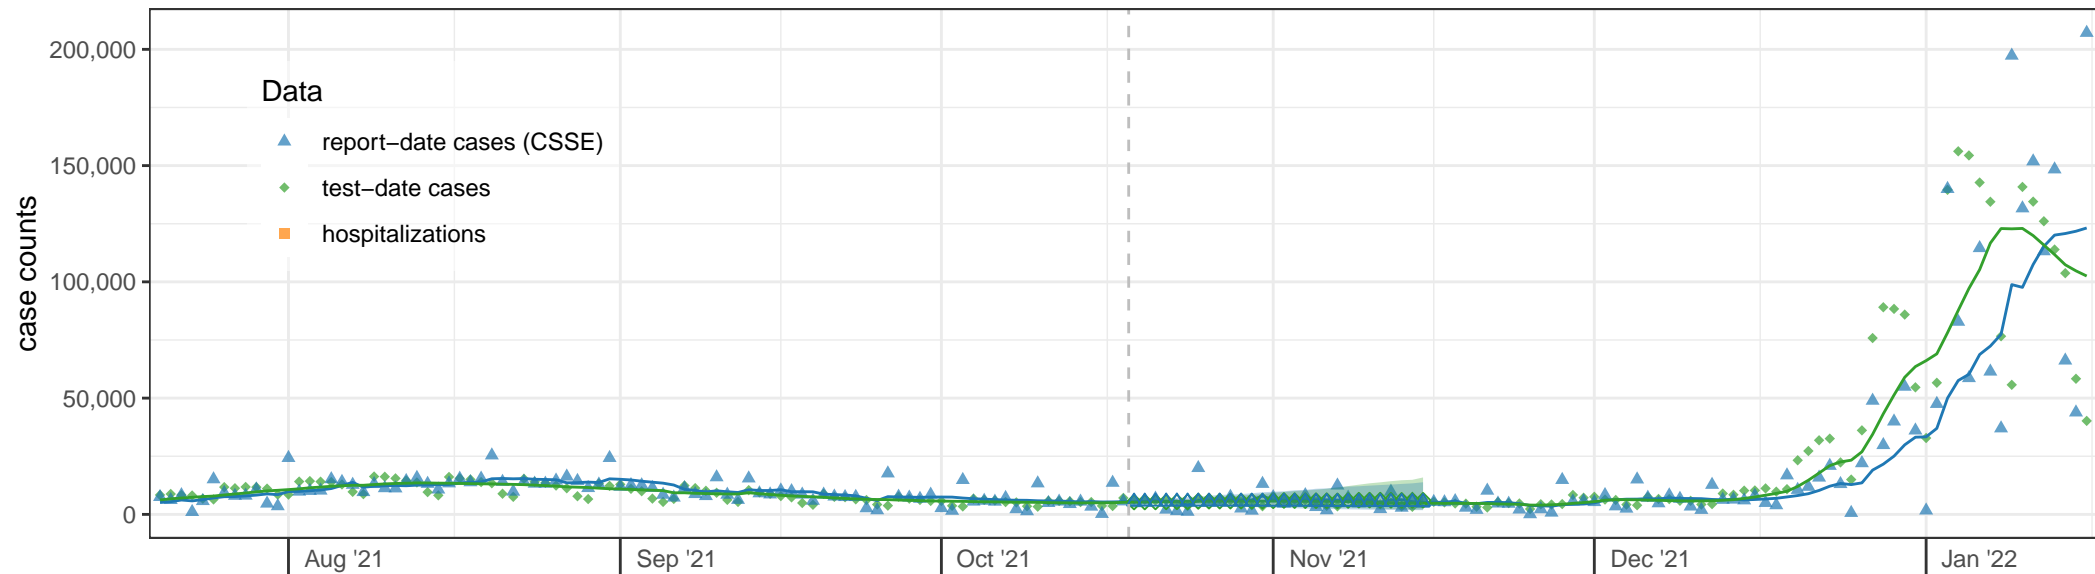

California hospitalization data and forecasts: 2021-10-18

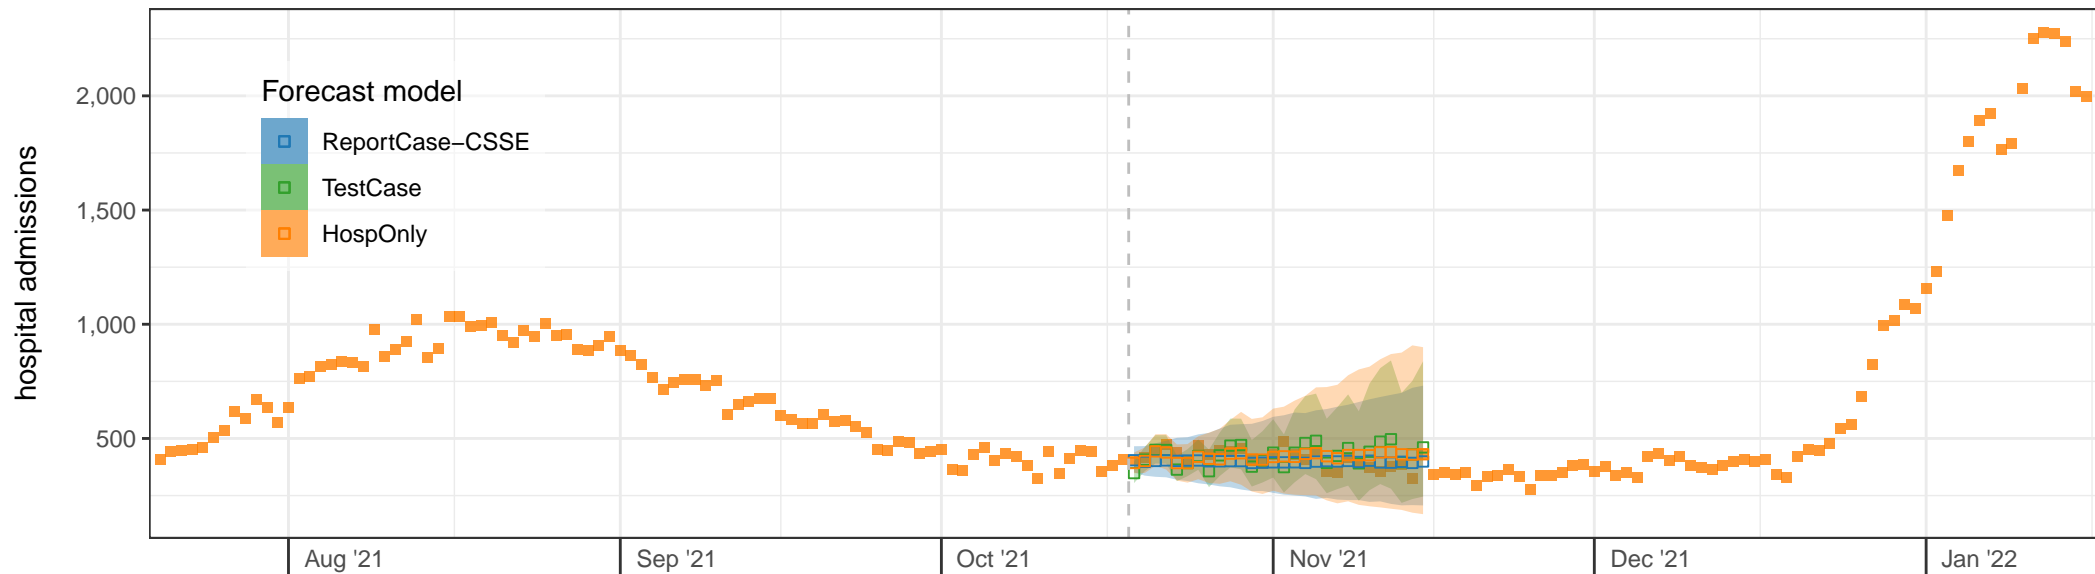

### California case data and forecasts: 2021-10-25

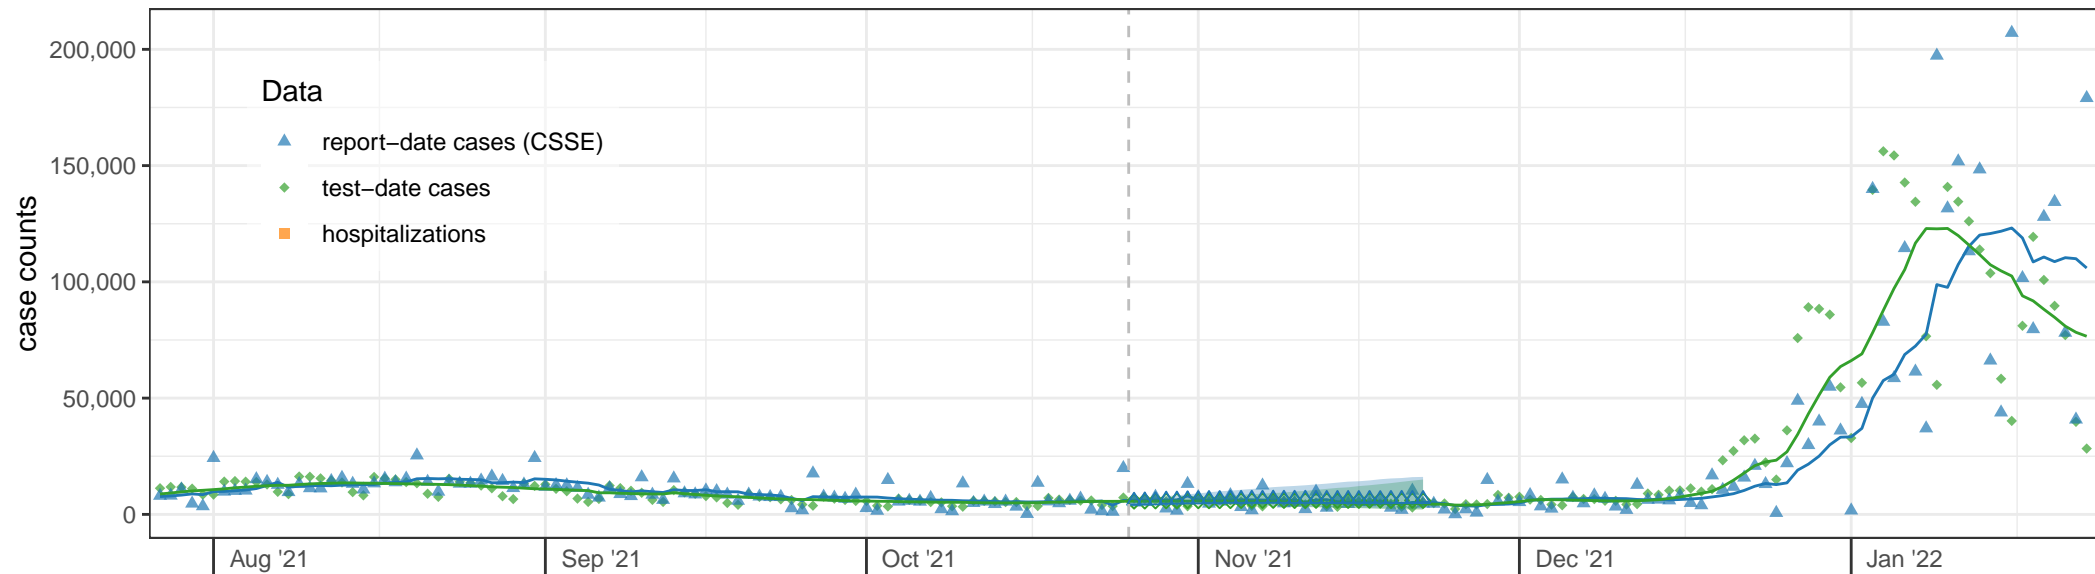

### California hospitalization data and forecasts: 2021-10-25

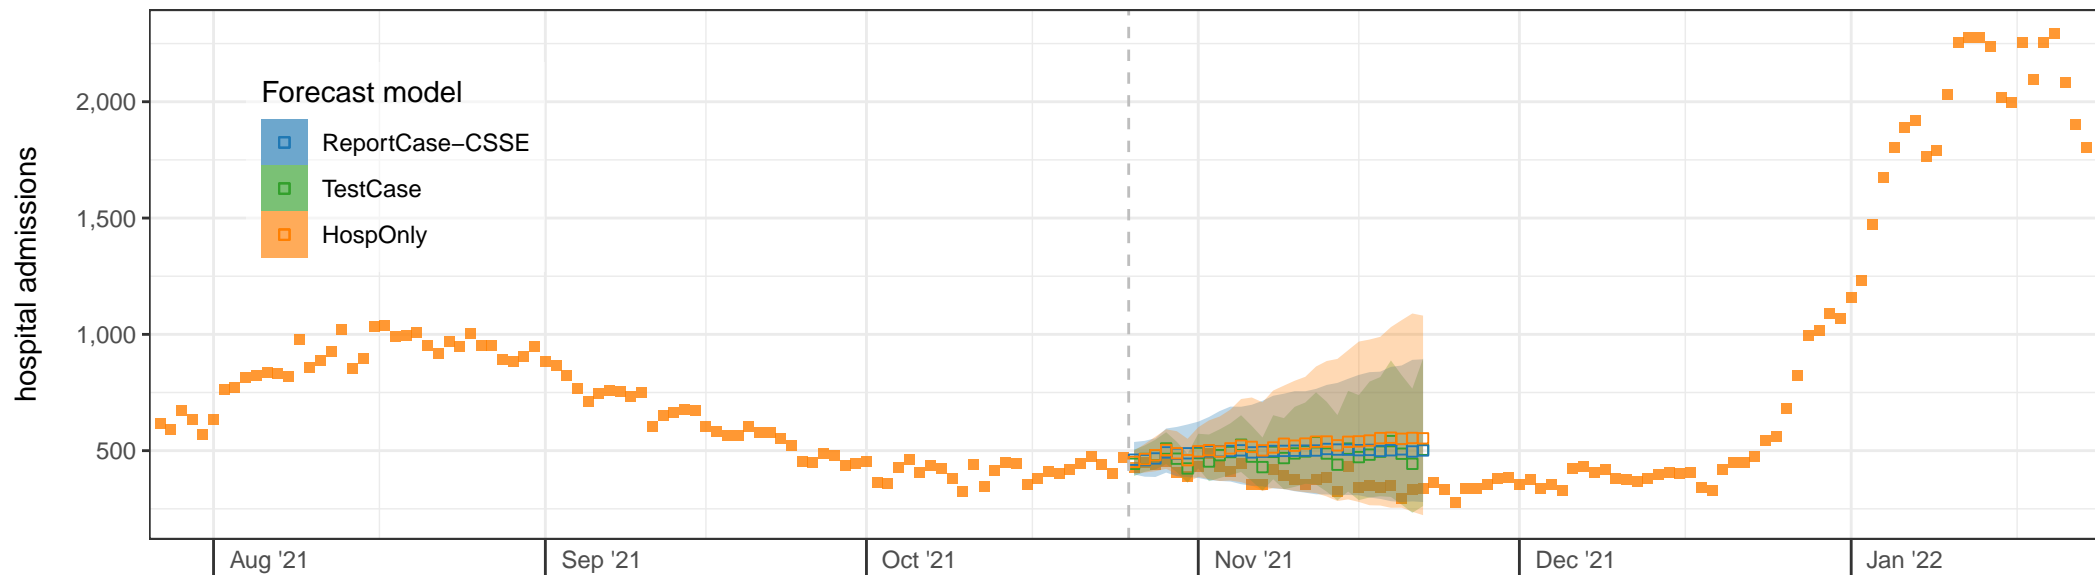

### California case data and forecasts: 2021-11-01

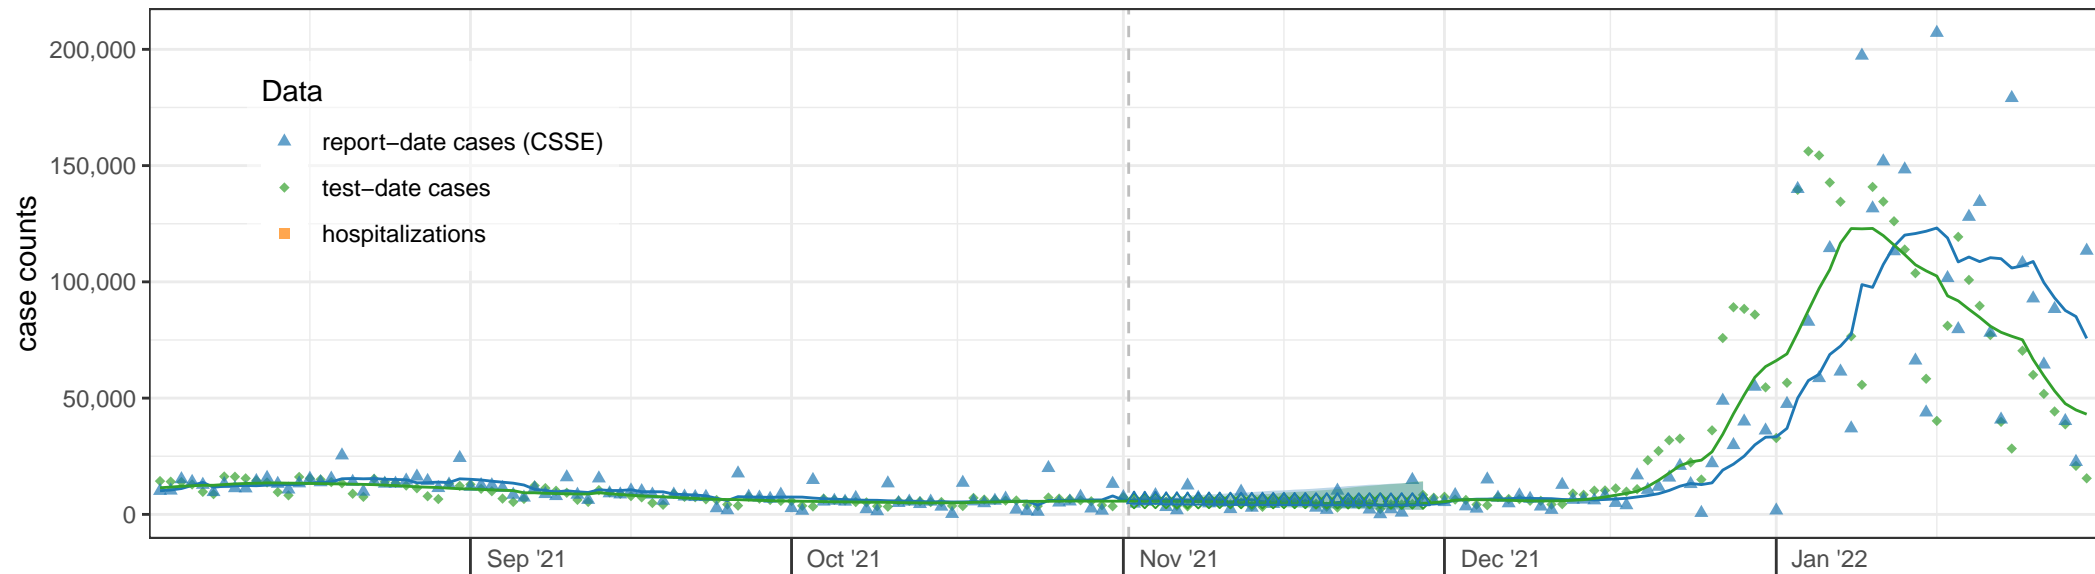

### California hospitalization data and forecasts: 2021-11-01

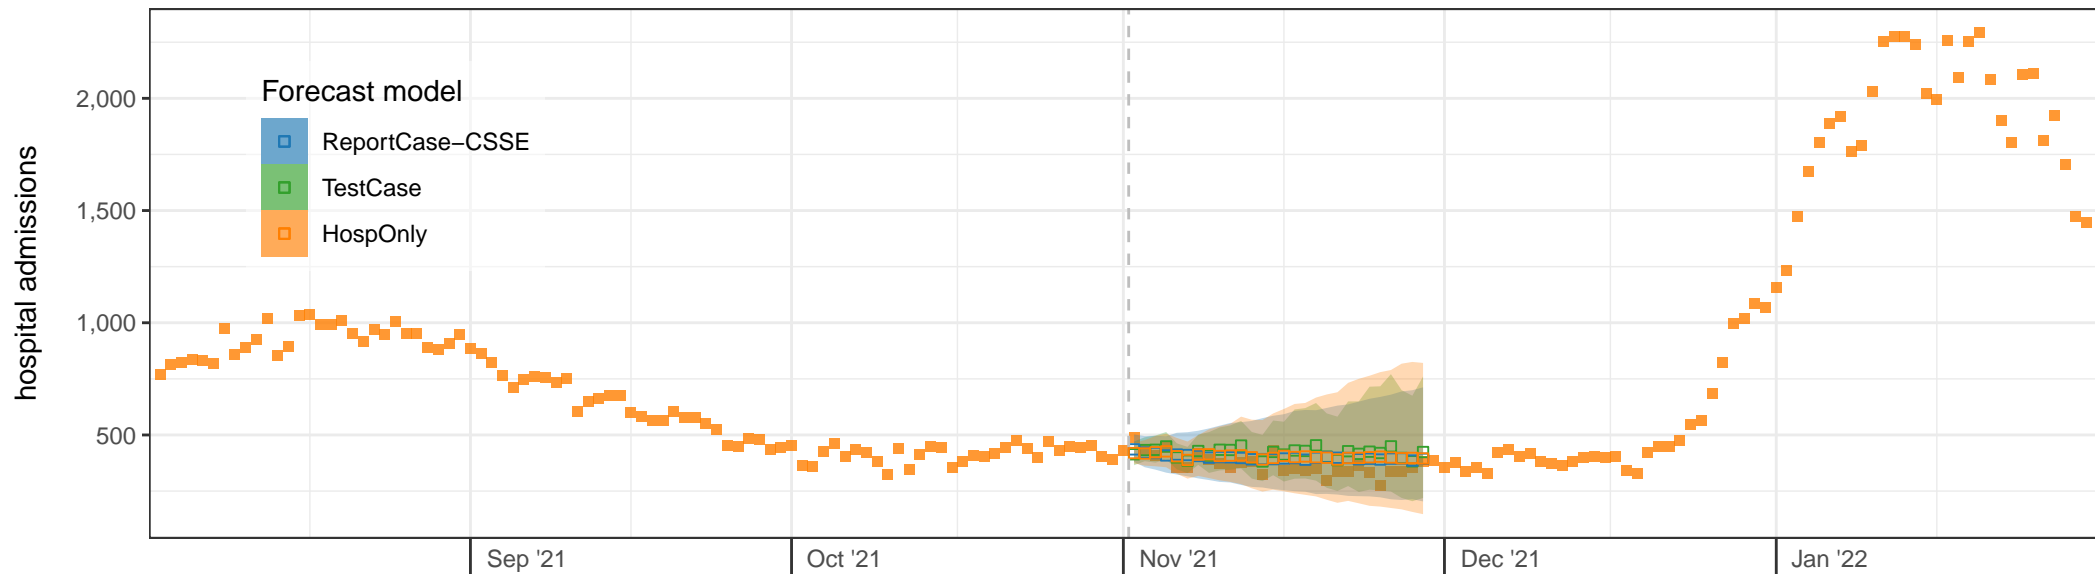



### California case data and forecasts: 2021-11-08

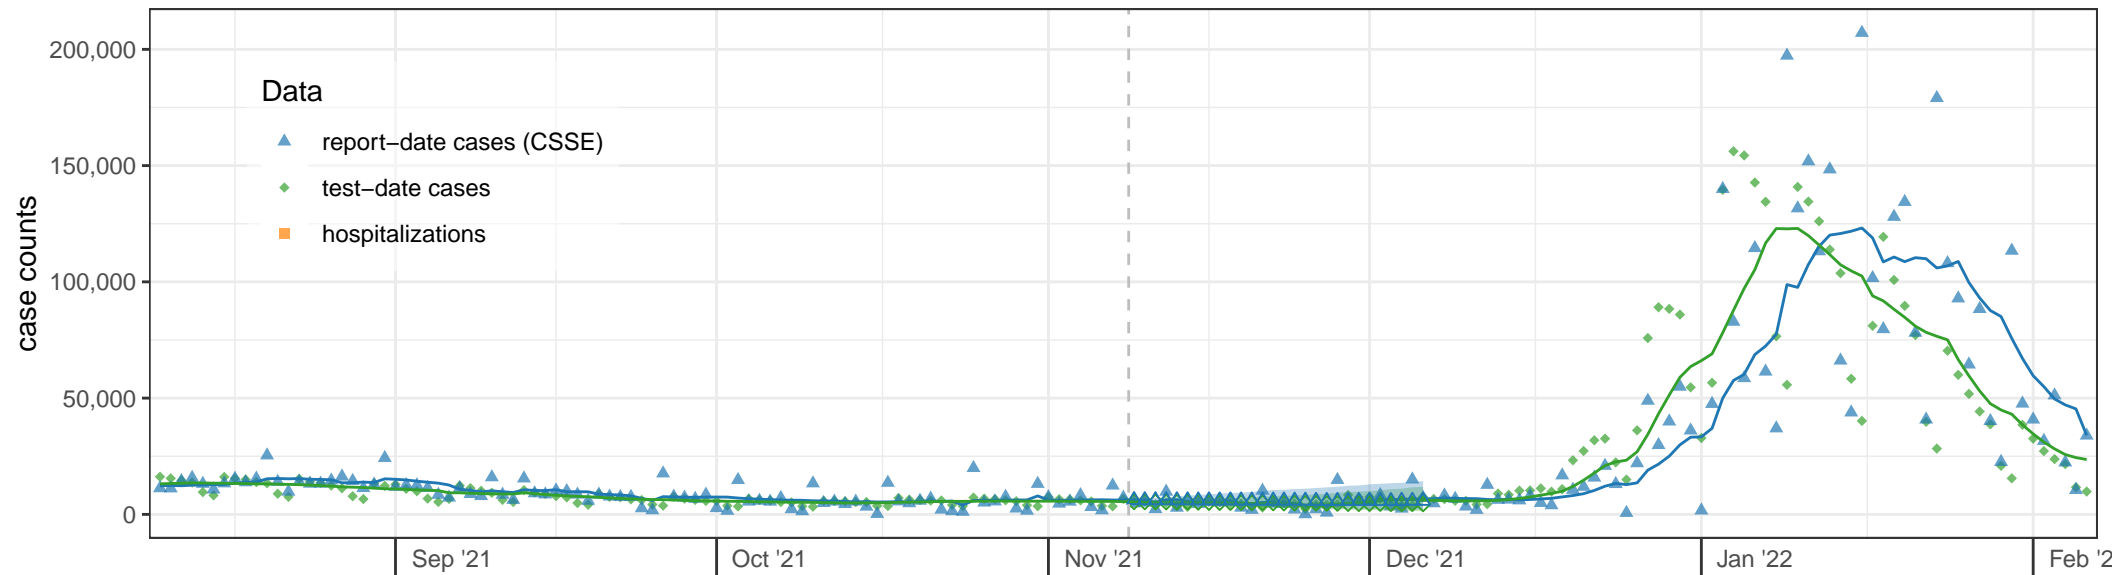

### California hospitalization data and forecasts: 2021-11-08

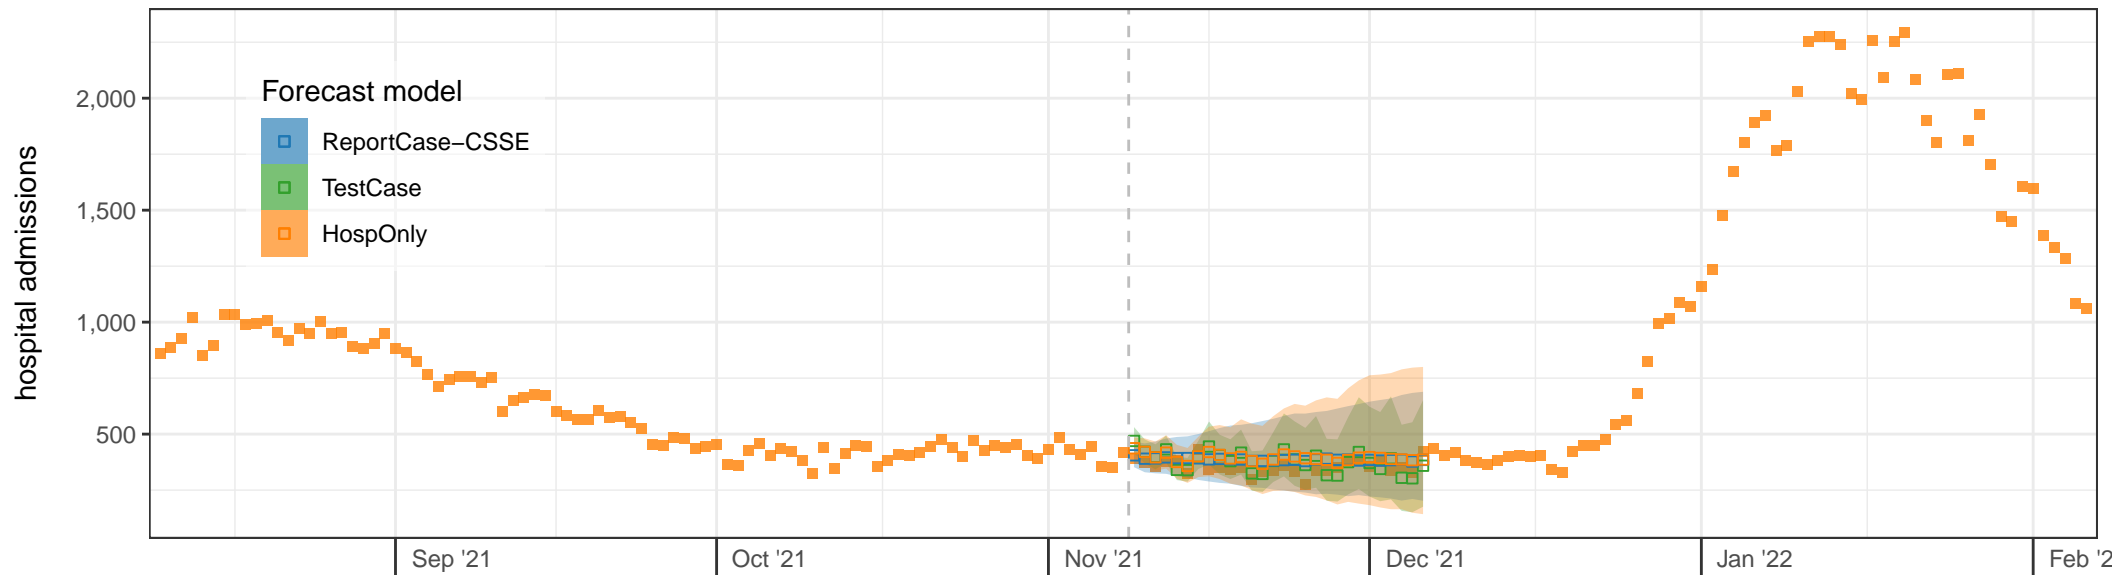

### California case data and forecasts: 2021-11-15

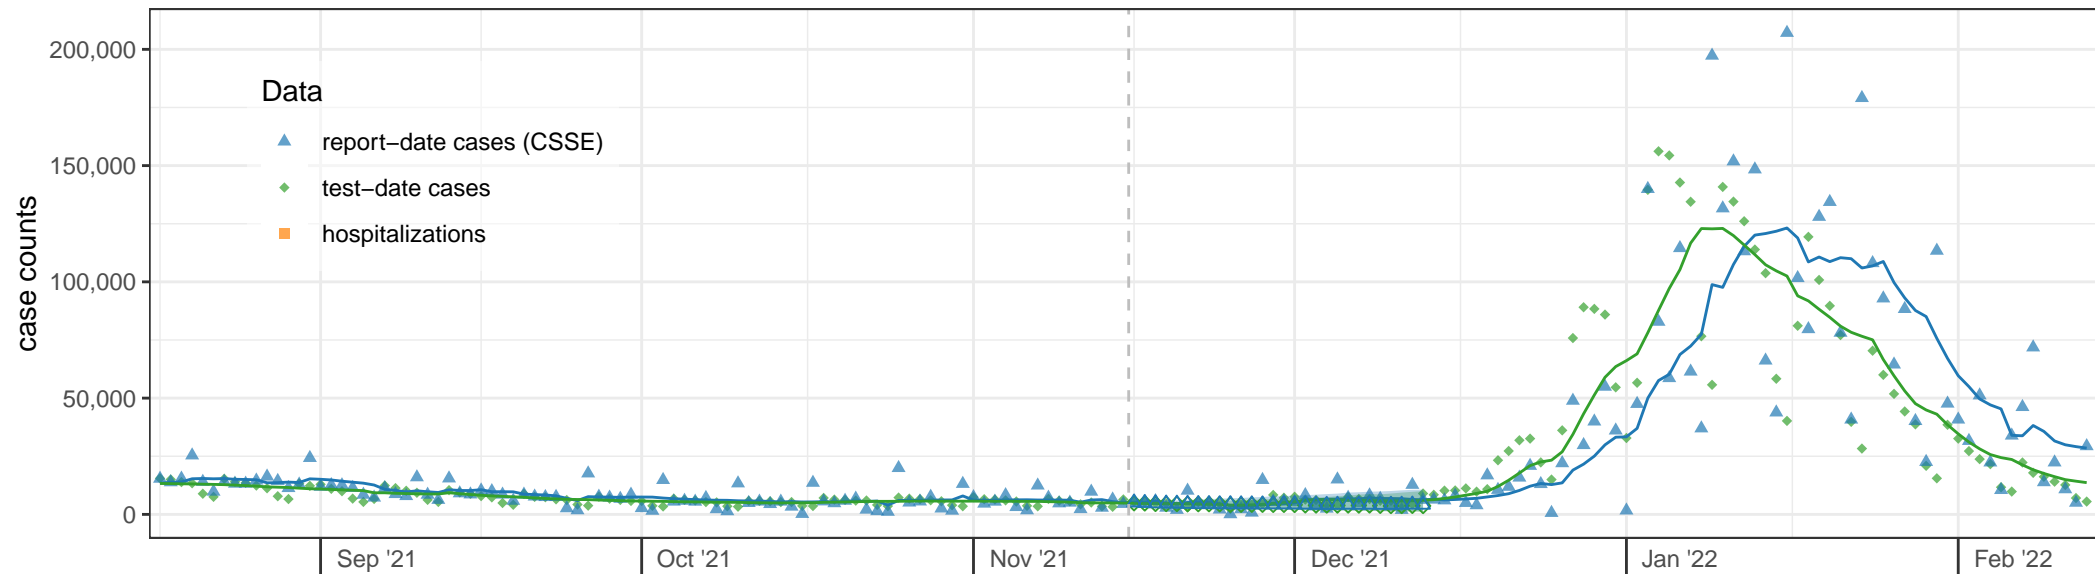

### California hospitalization data and forecasts: 2021-11-15

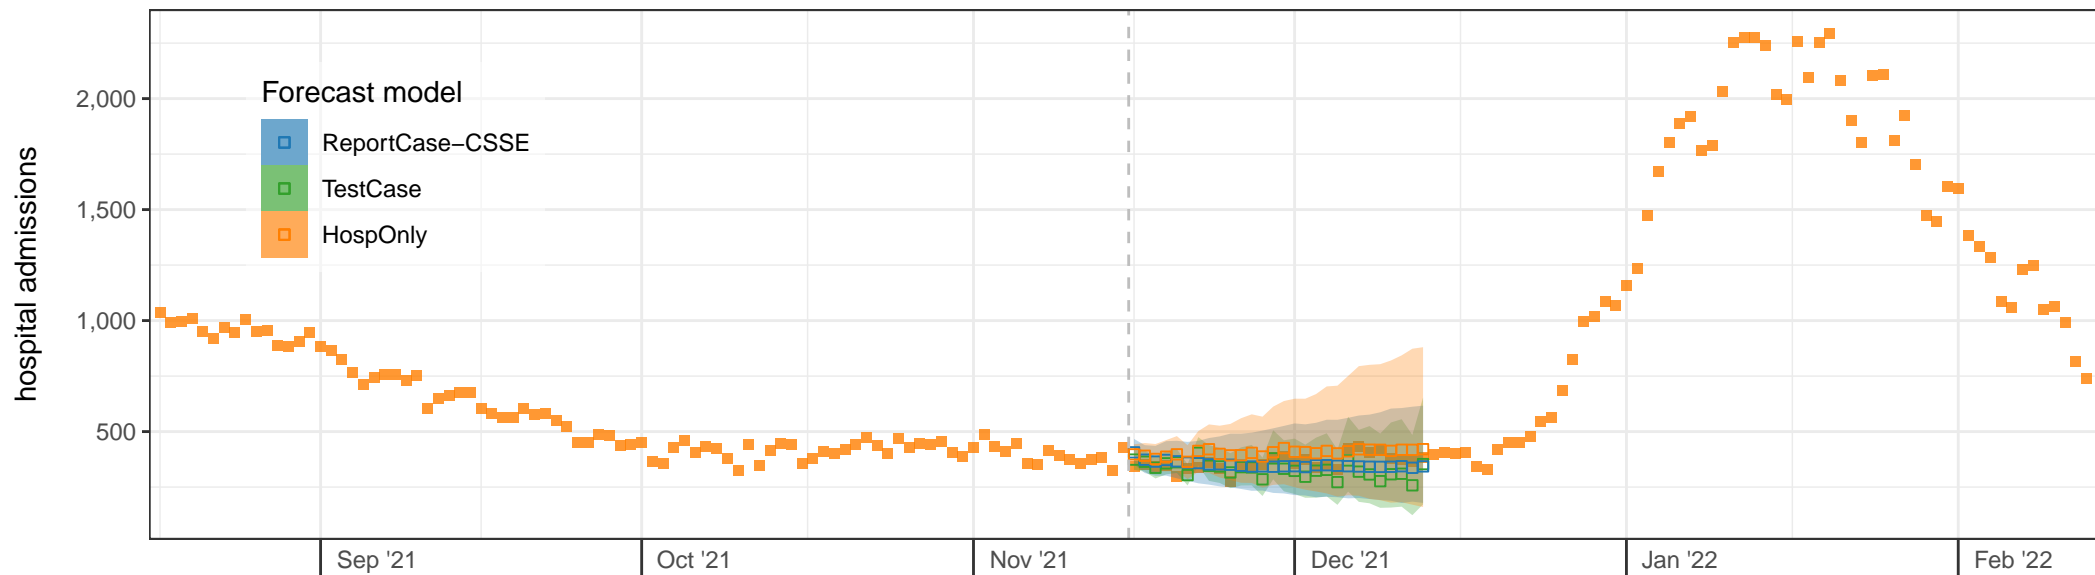

### California case data and forecasts: 2021-11-22

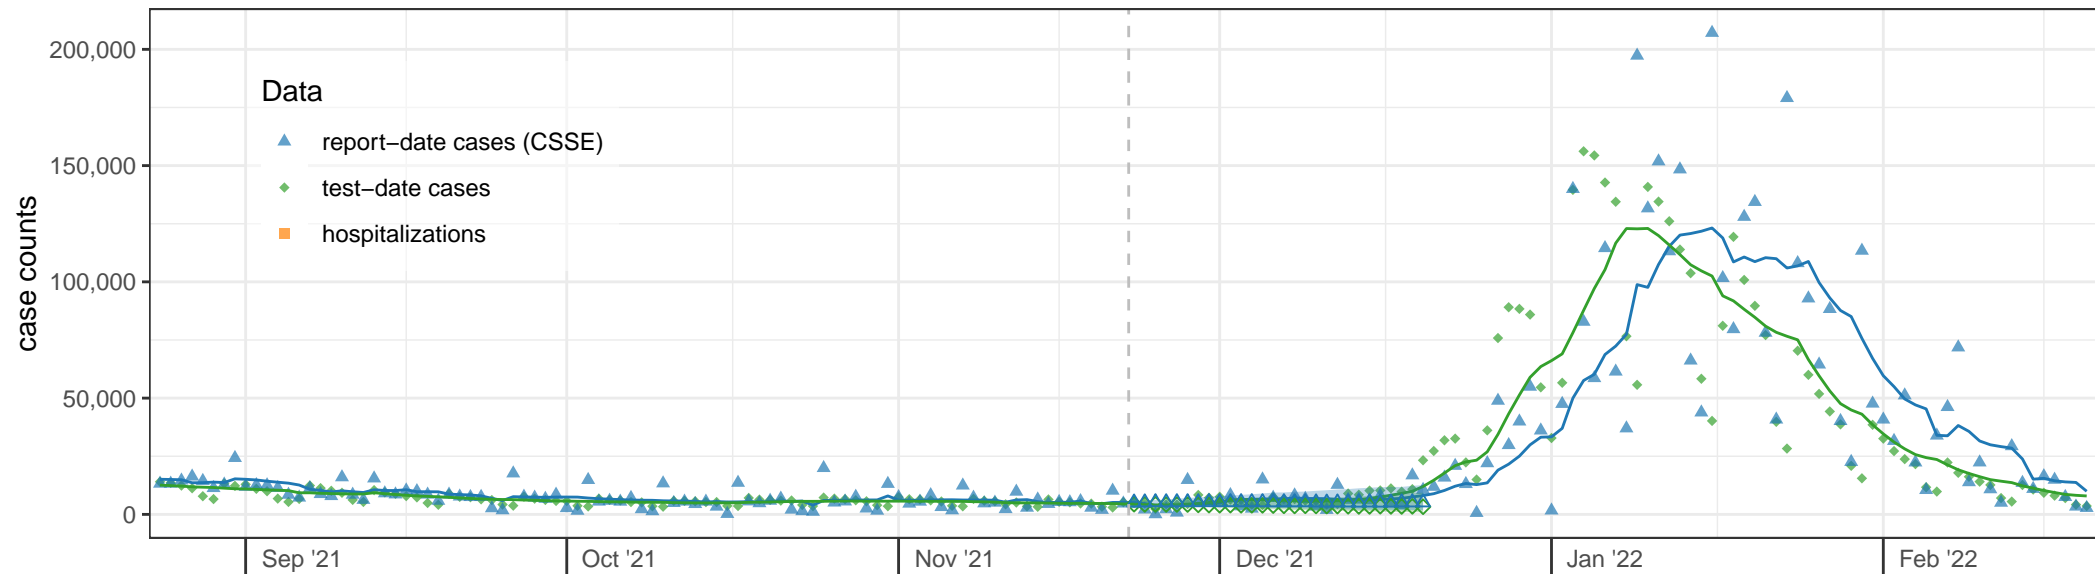

### California hospitalization data and forecasts: 2021-11-22

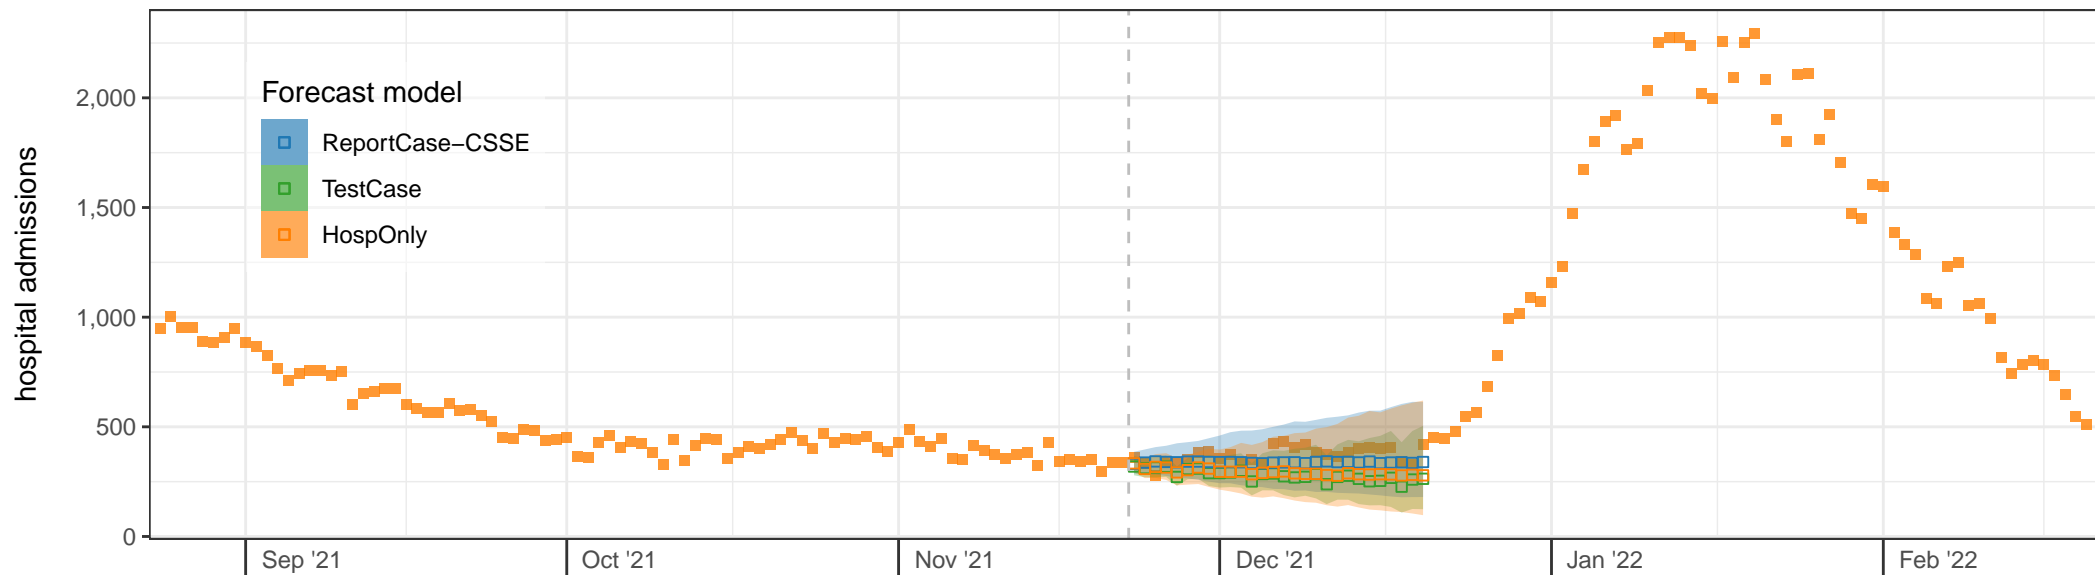

### California case data and forecasts: 2021-11-29

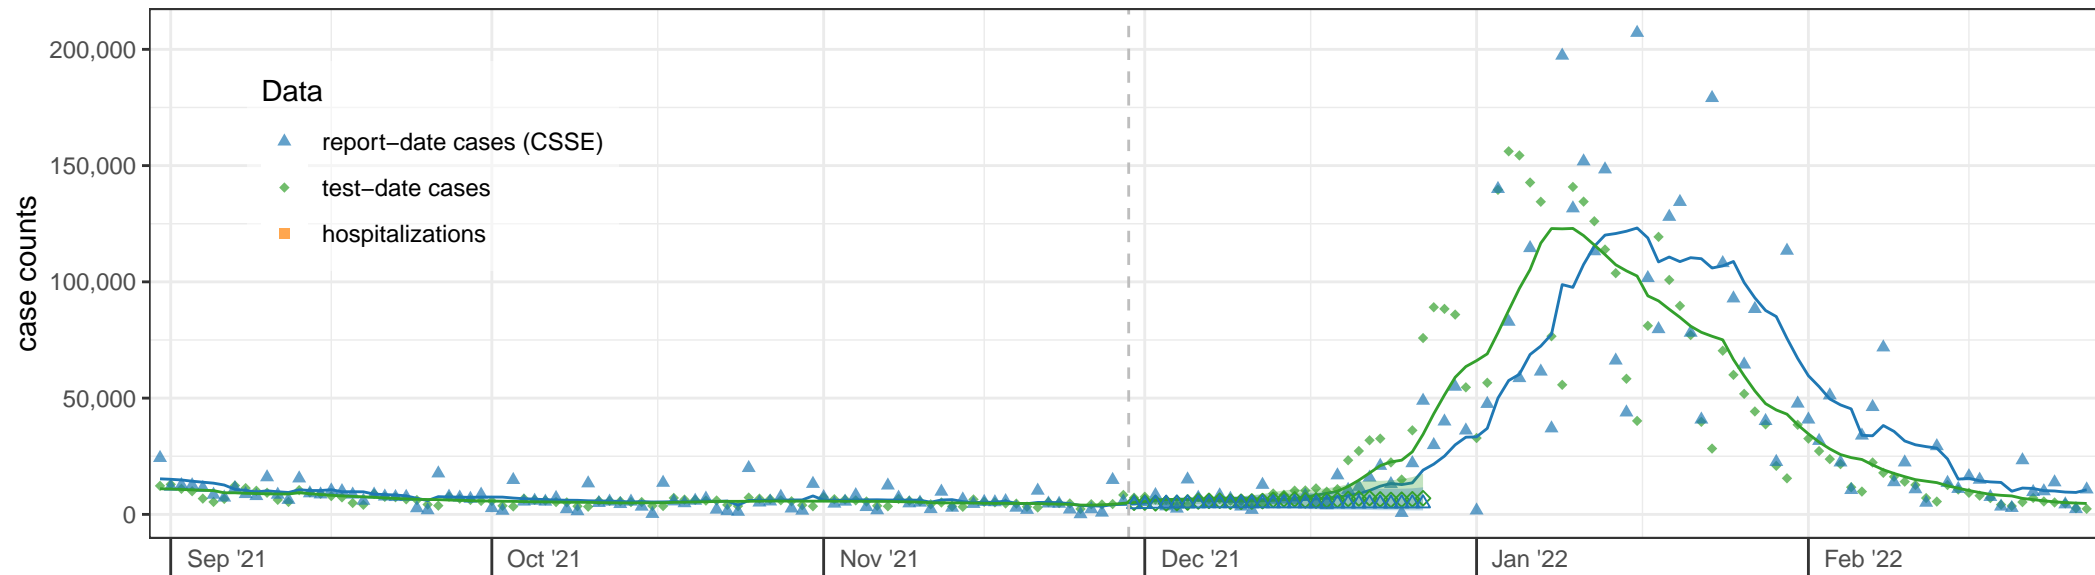

### California hospitalization data and forecasts: 2021-11-29

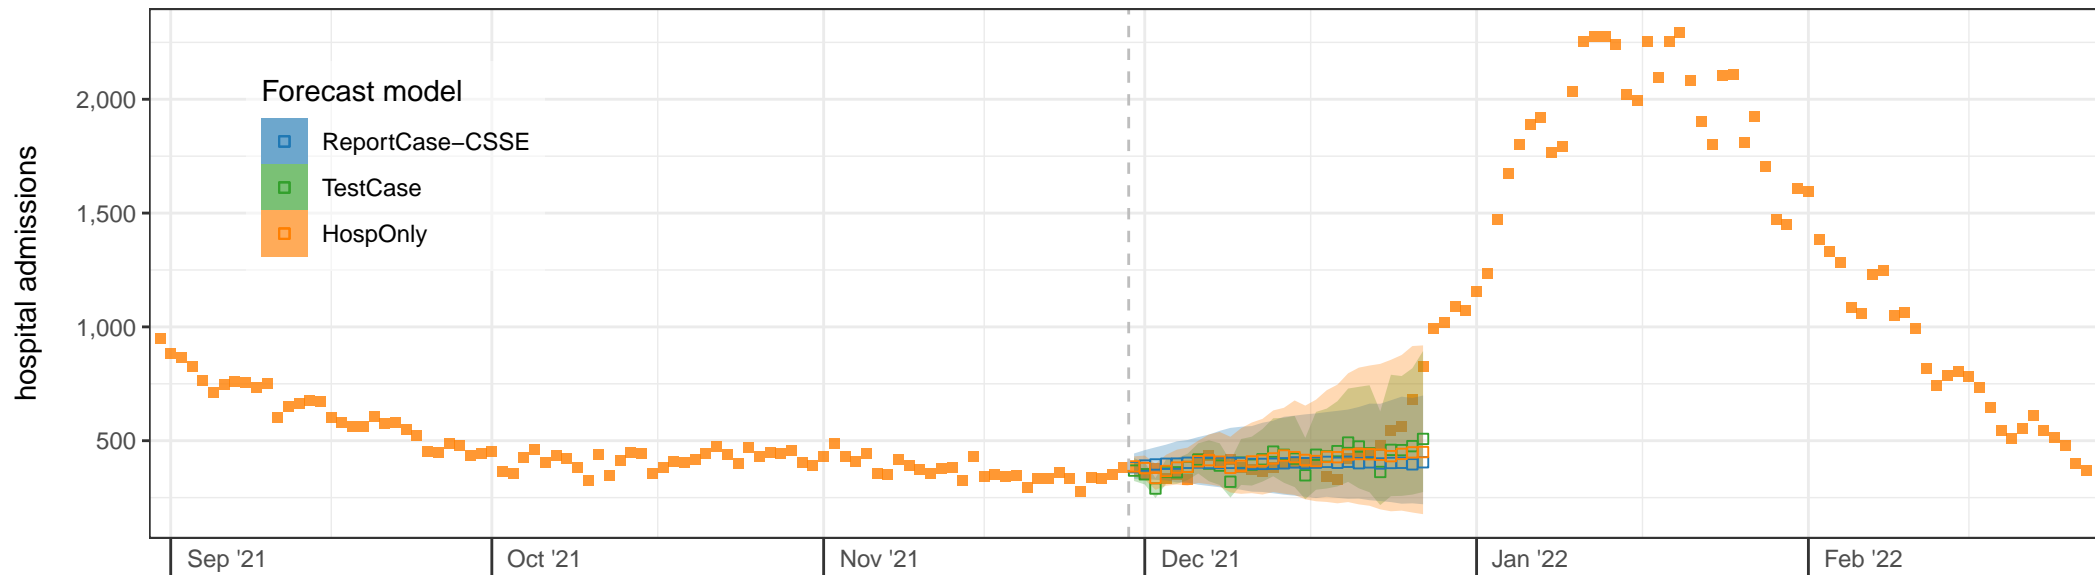

California case data and forecasts: 2021-12-06

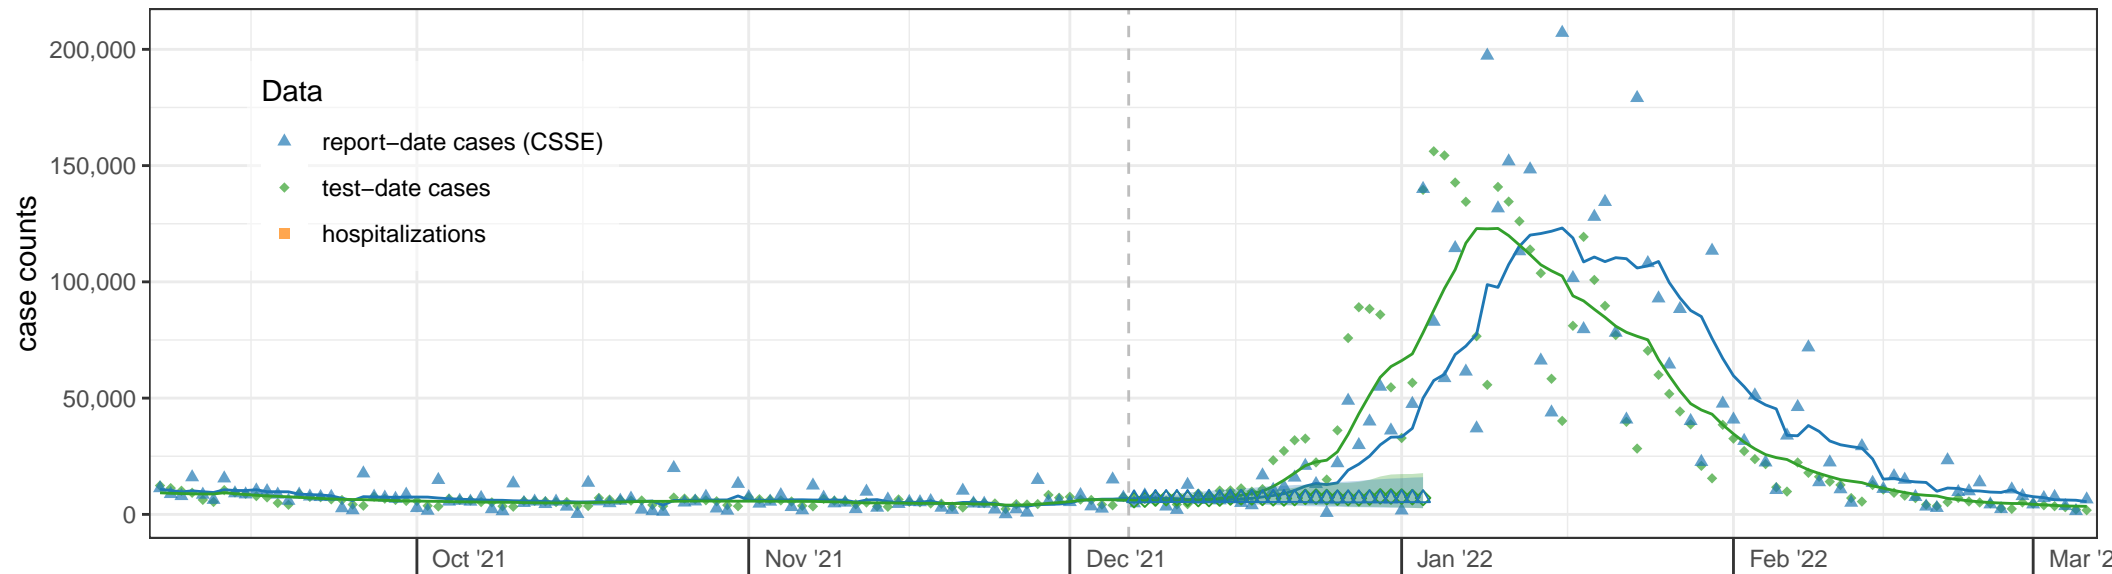

California hospitalization data and forecasts: 2021-12-06

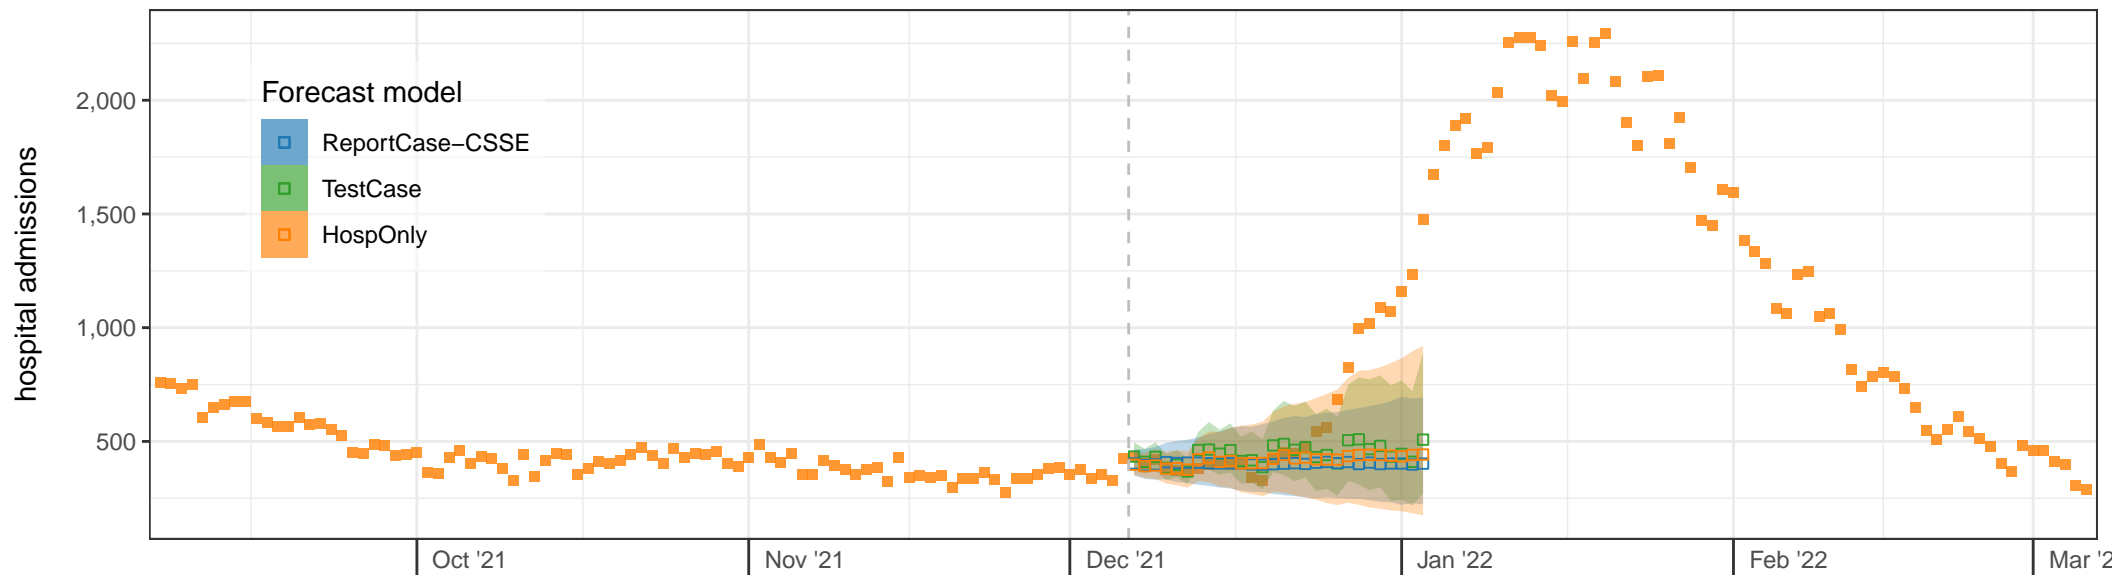

### California case data and forecasts: 2021-12-13

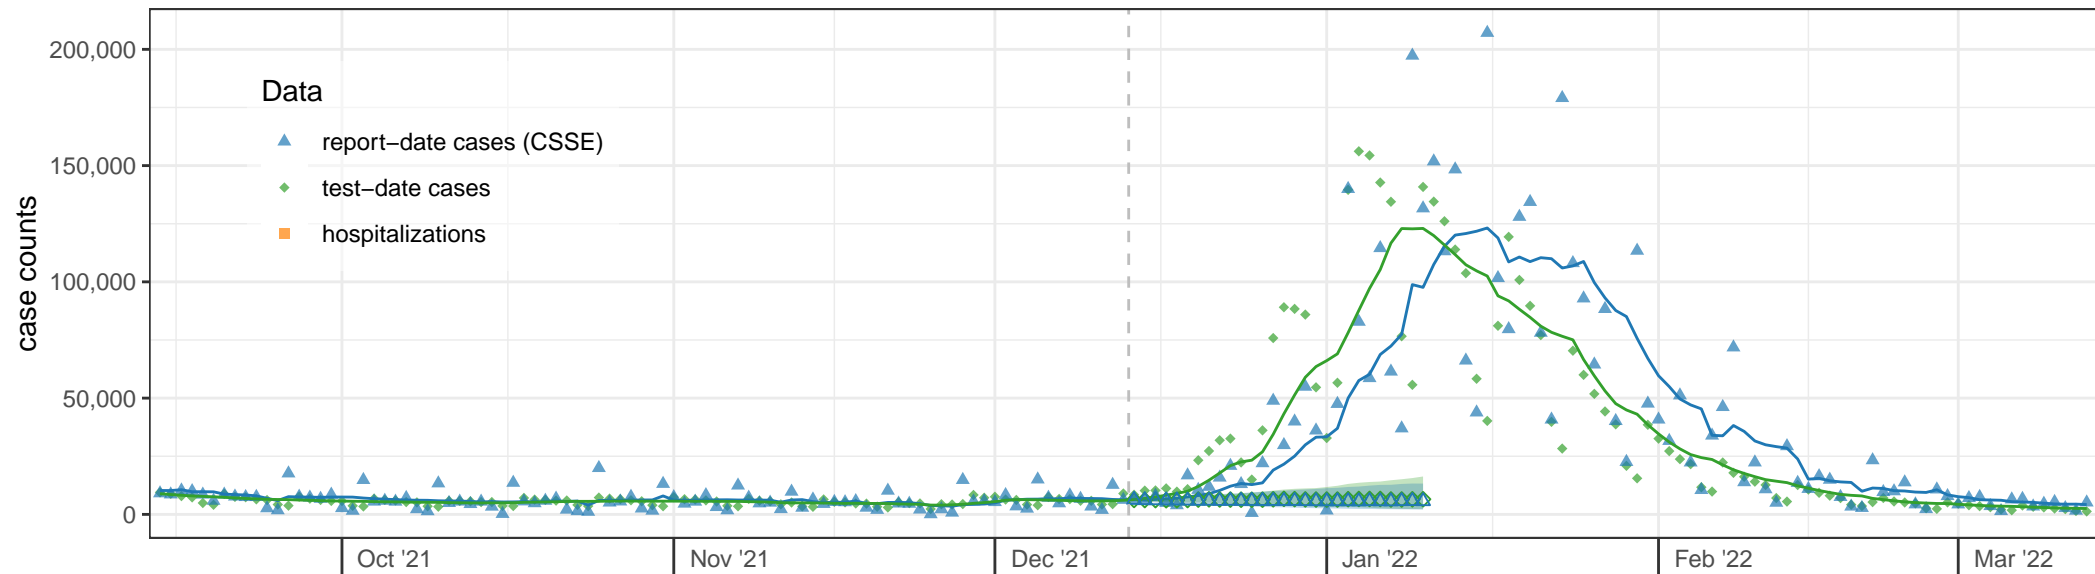

### California hospitalization data and forecasts: 2021-12-13

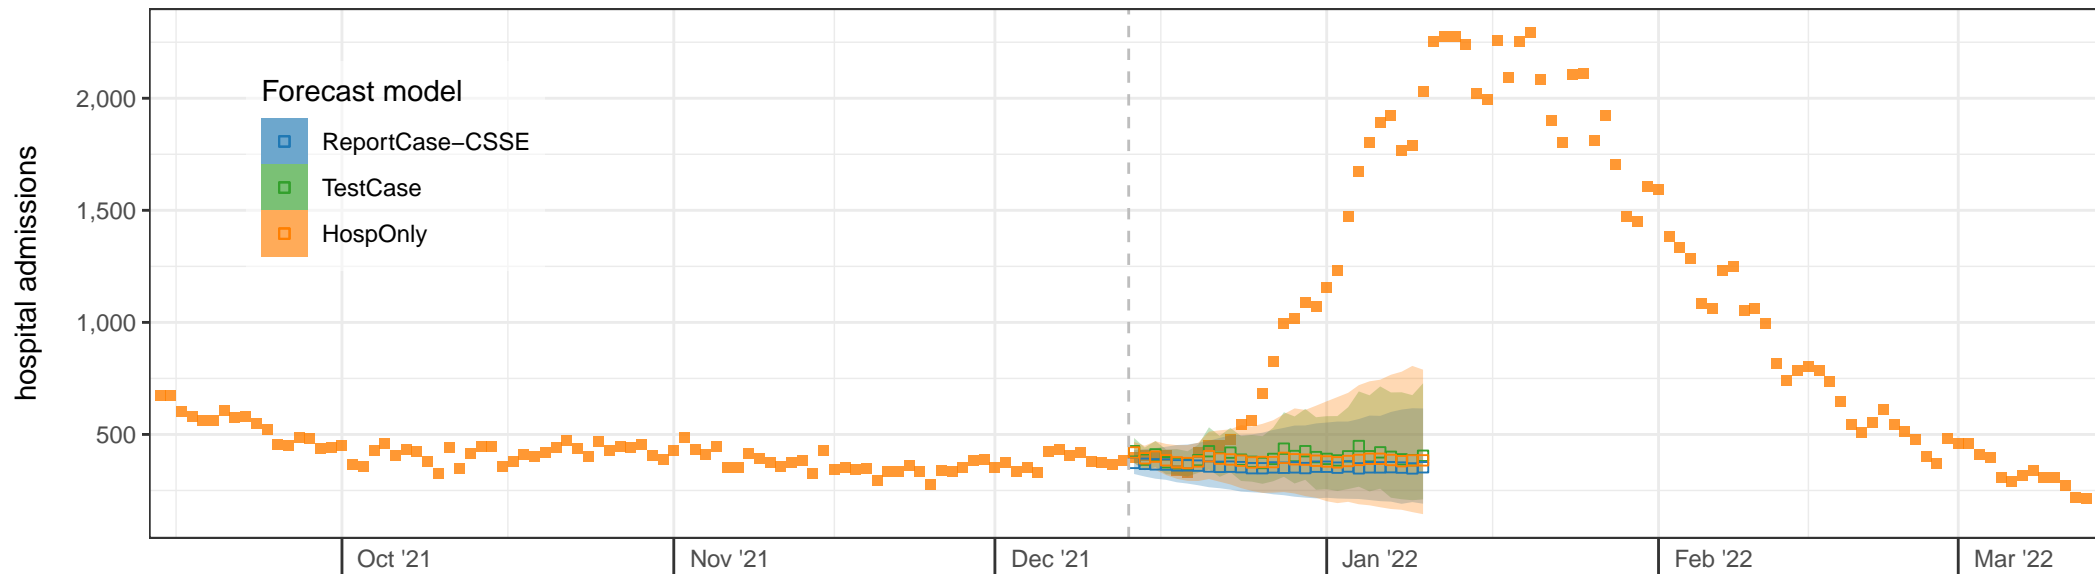

### California case data and forecasts: 2021-12-20

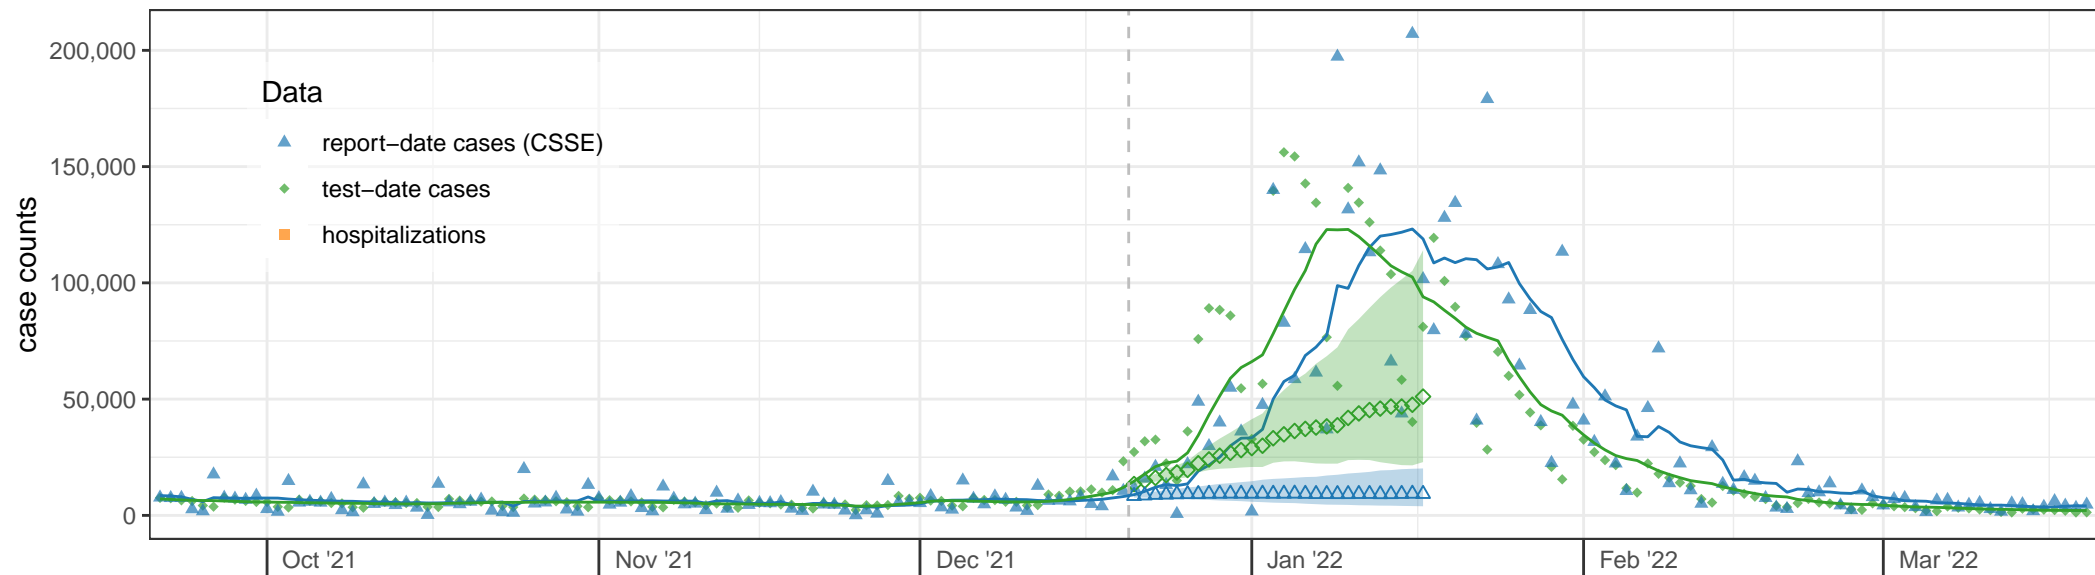

### California hospitalization data and forecasts: 2021-12-20

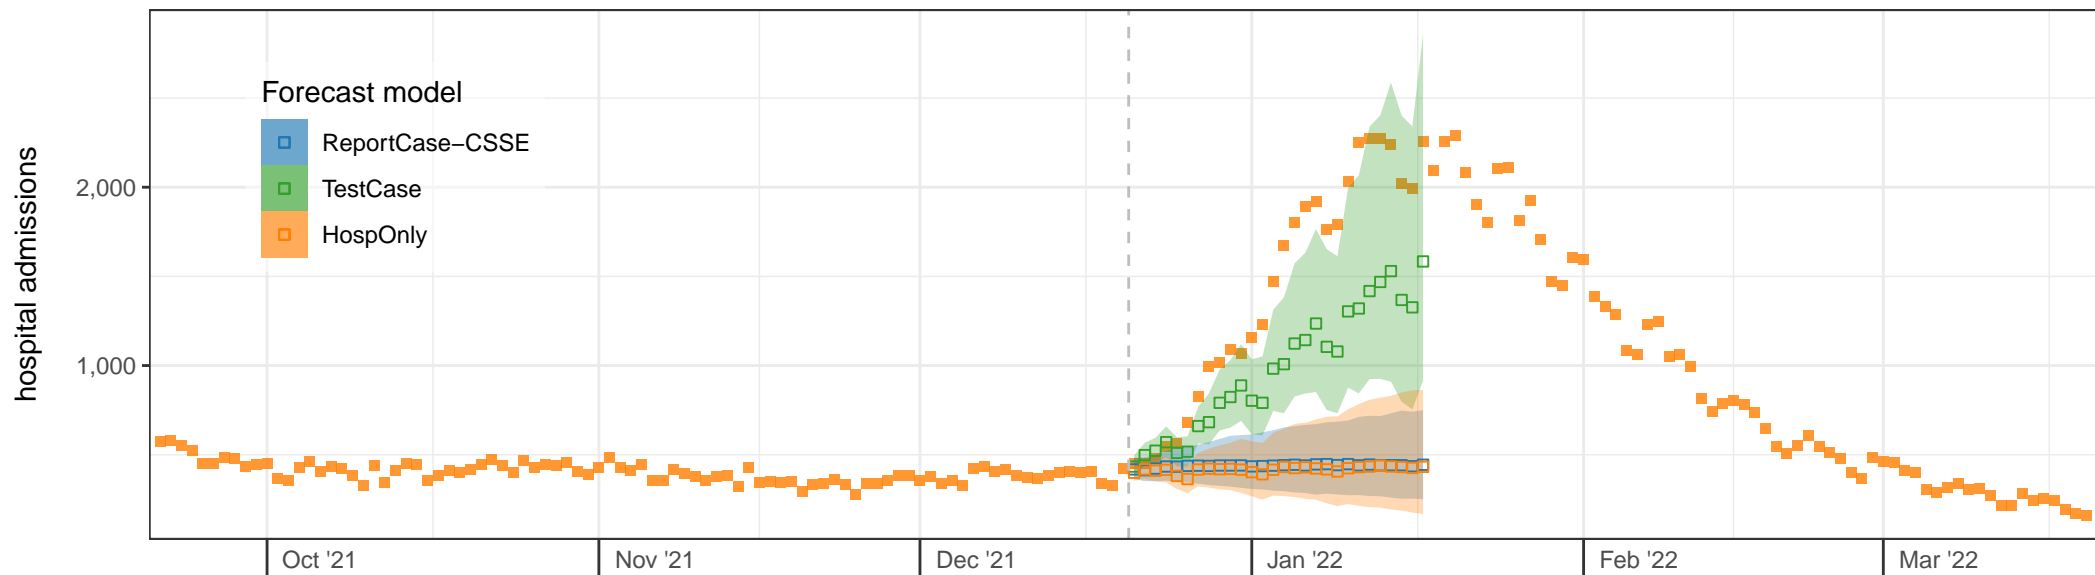

### California case data and forecasts: 2021-12-27

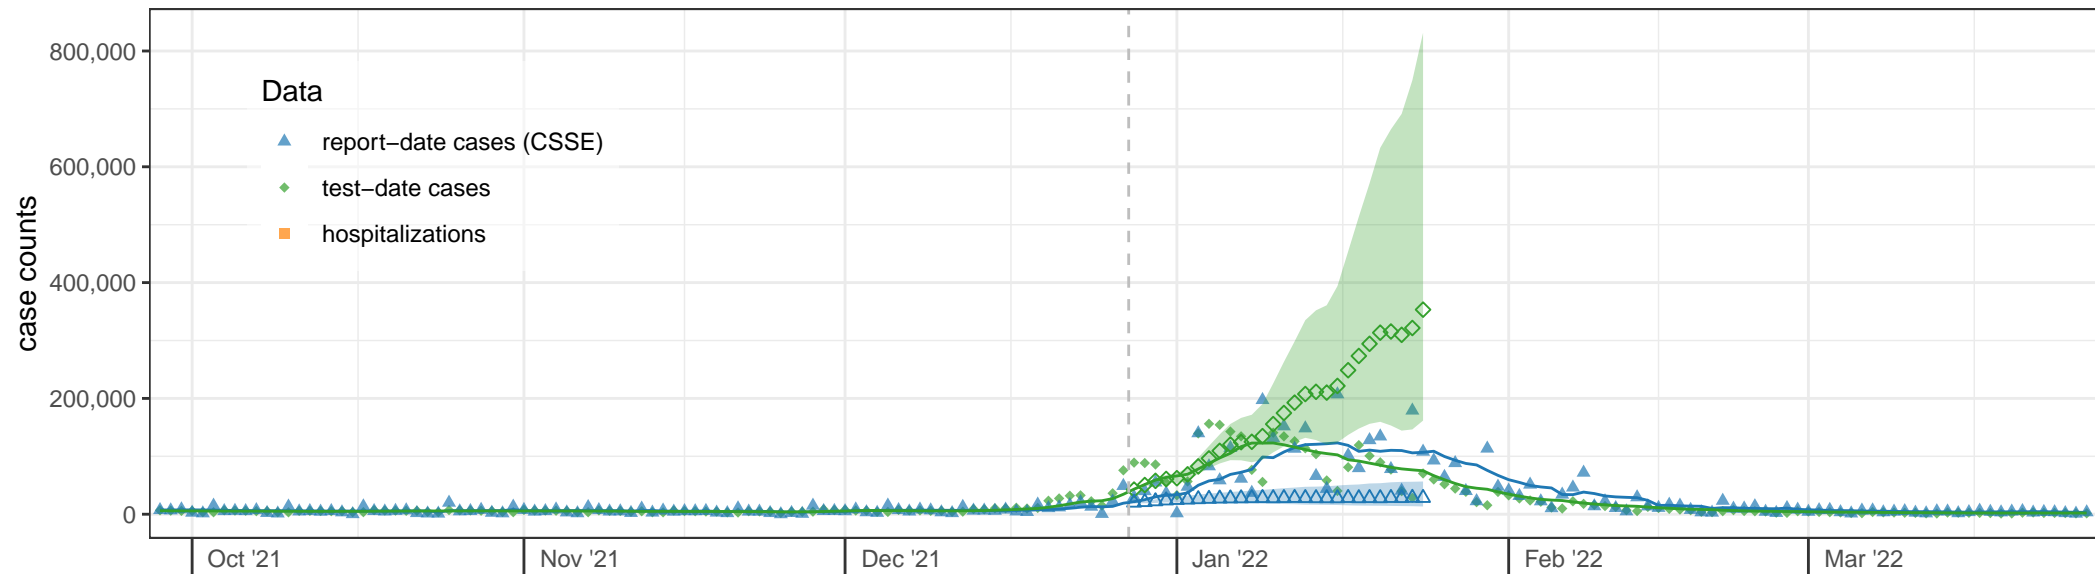

### California hospitalization data and forecasts: 2021-12-27

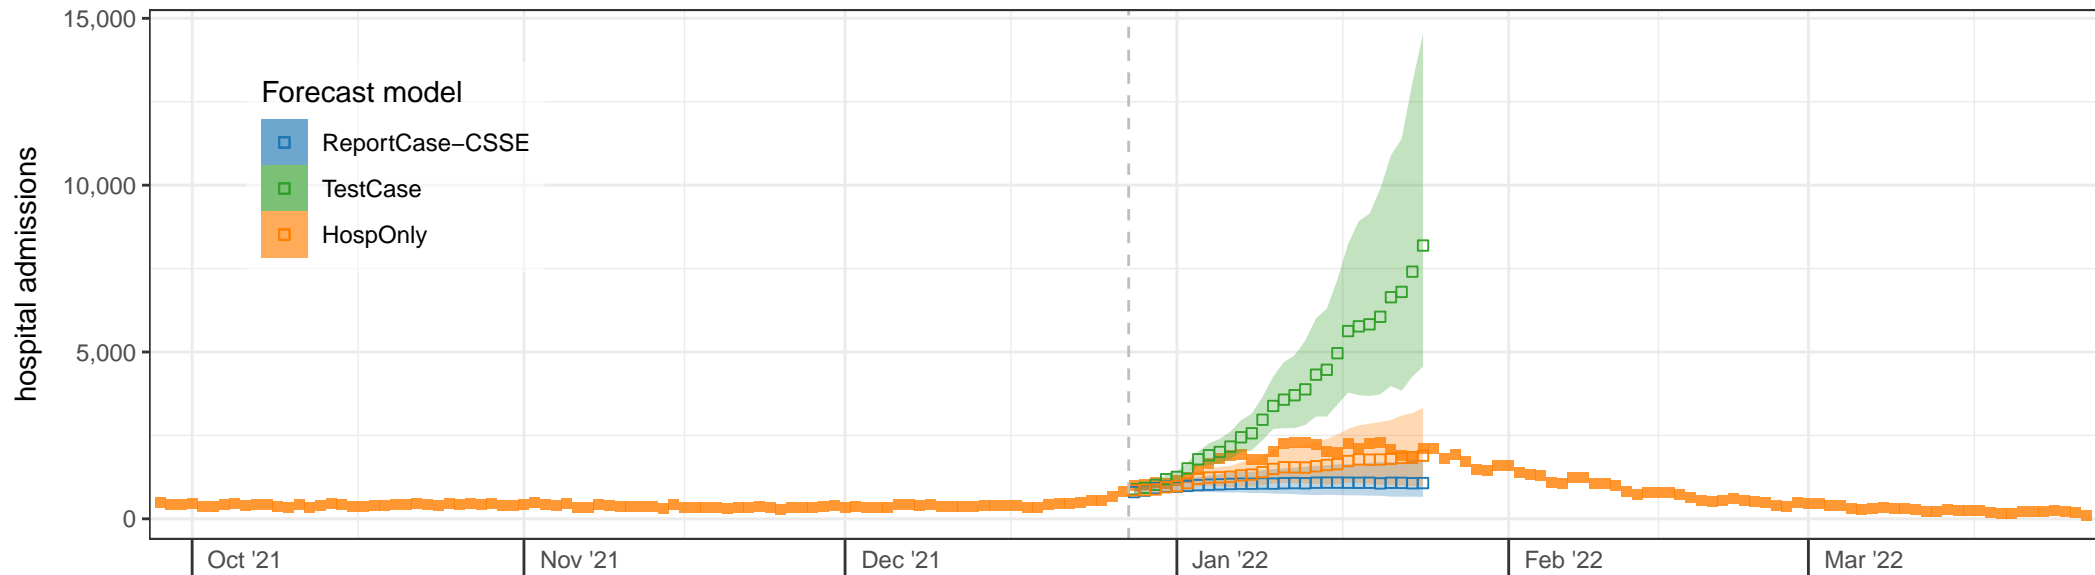



### California case data and forecasts: 2022-01-03

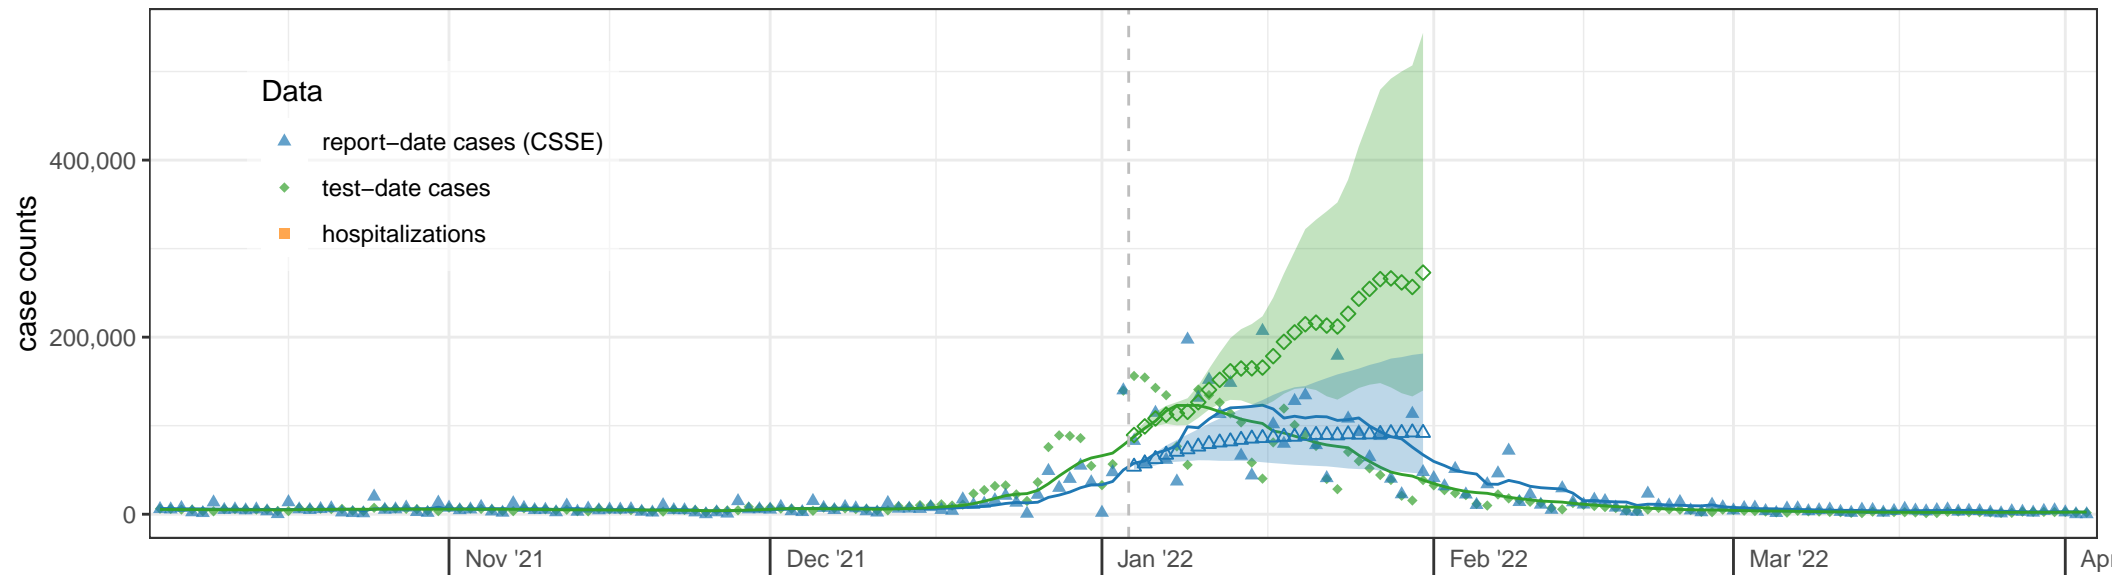

### California hospitalization data and forecasts: 2022-01-03

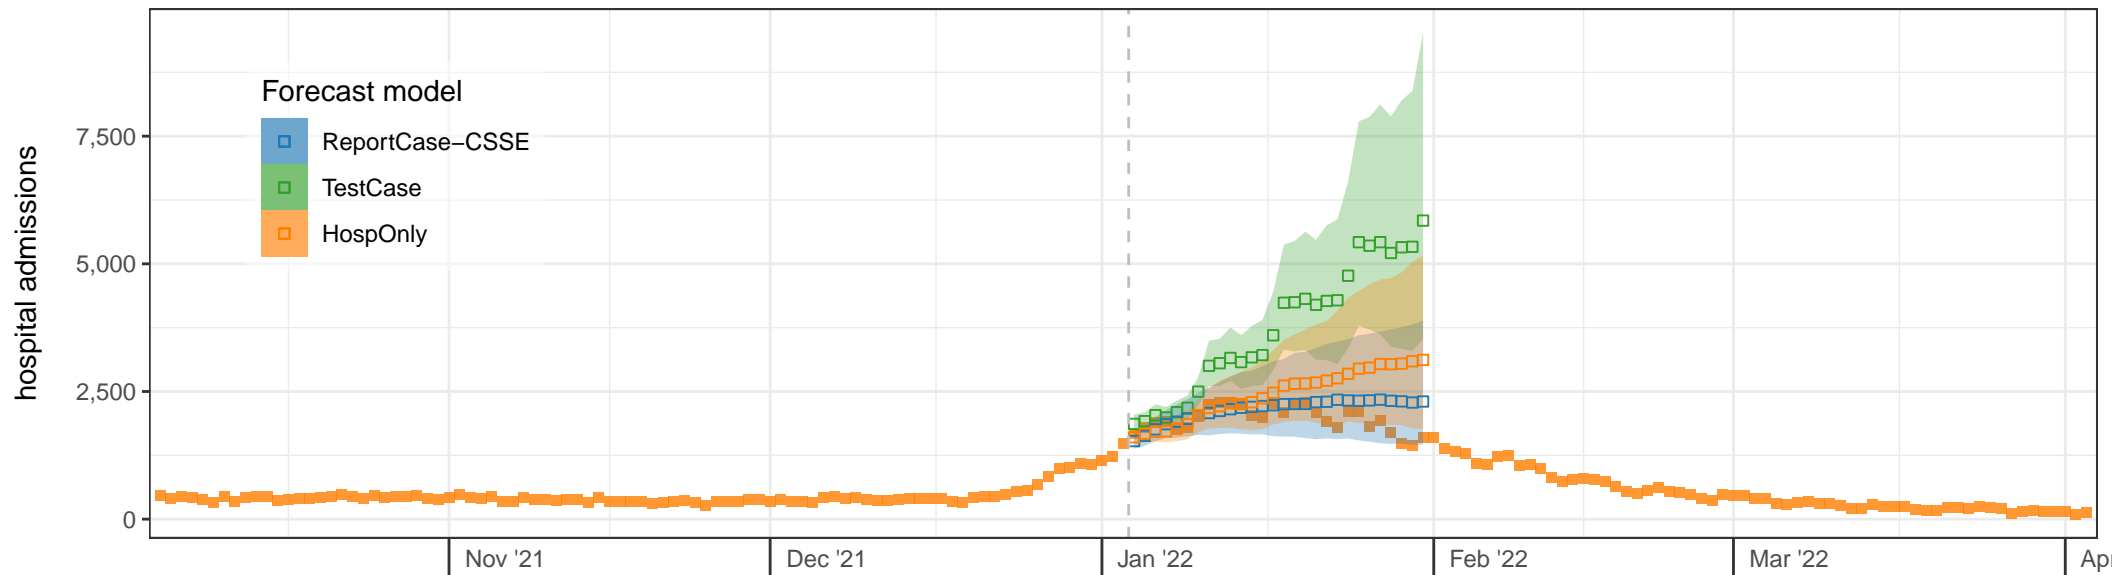

California case data and forecasts: 2022-01-10

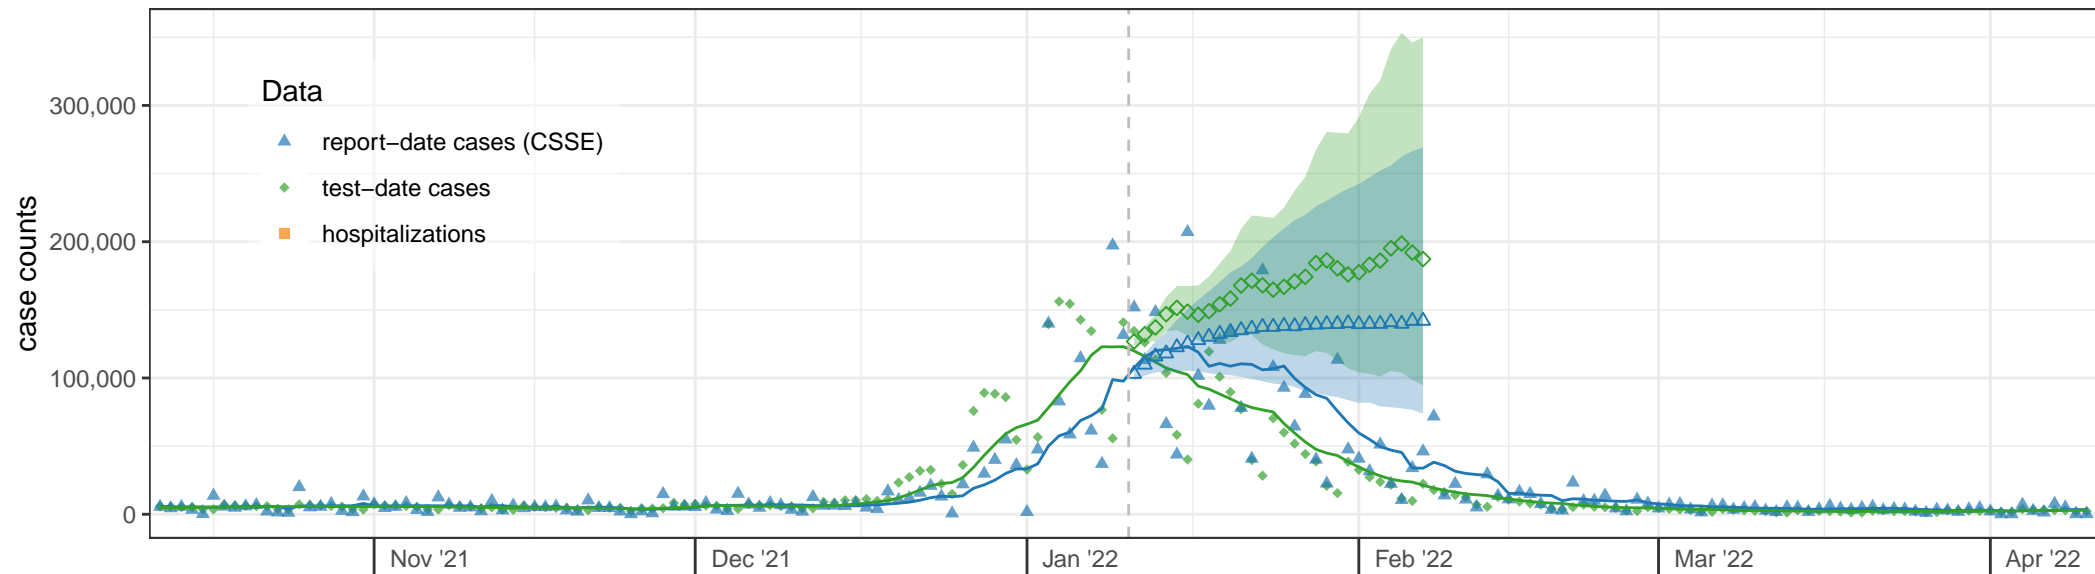

California hospitalization data and forecasts: 2022-01-10

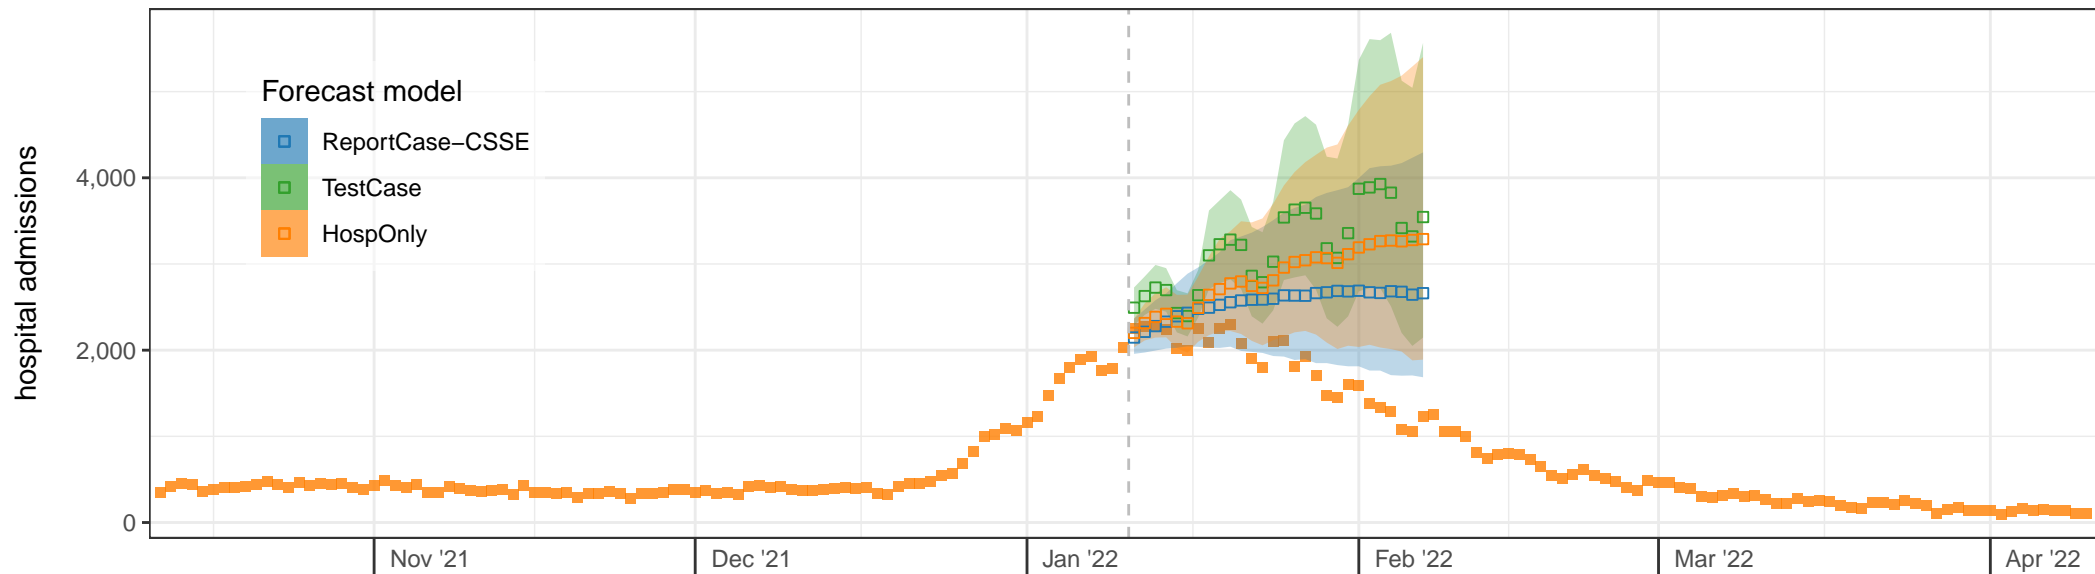

California case data and forecasts: 2022-01-17

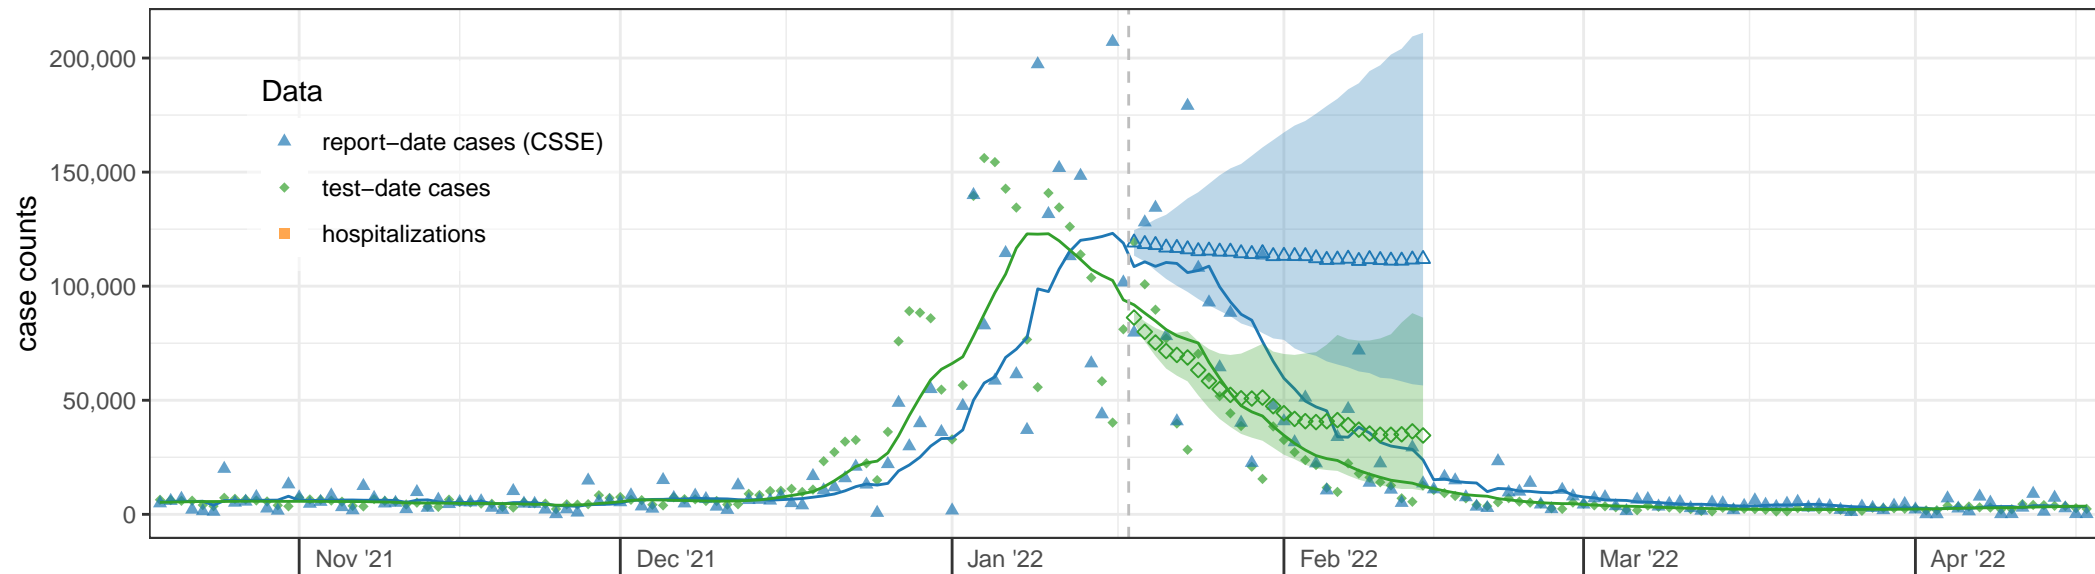

California hospitalization data and forecasts: 2022-01-17

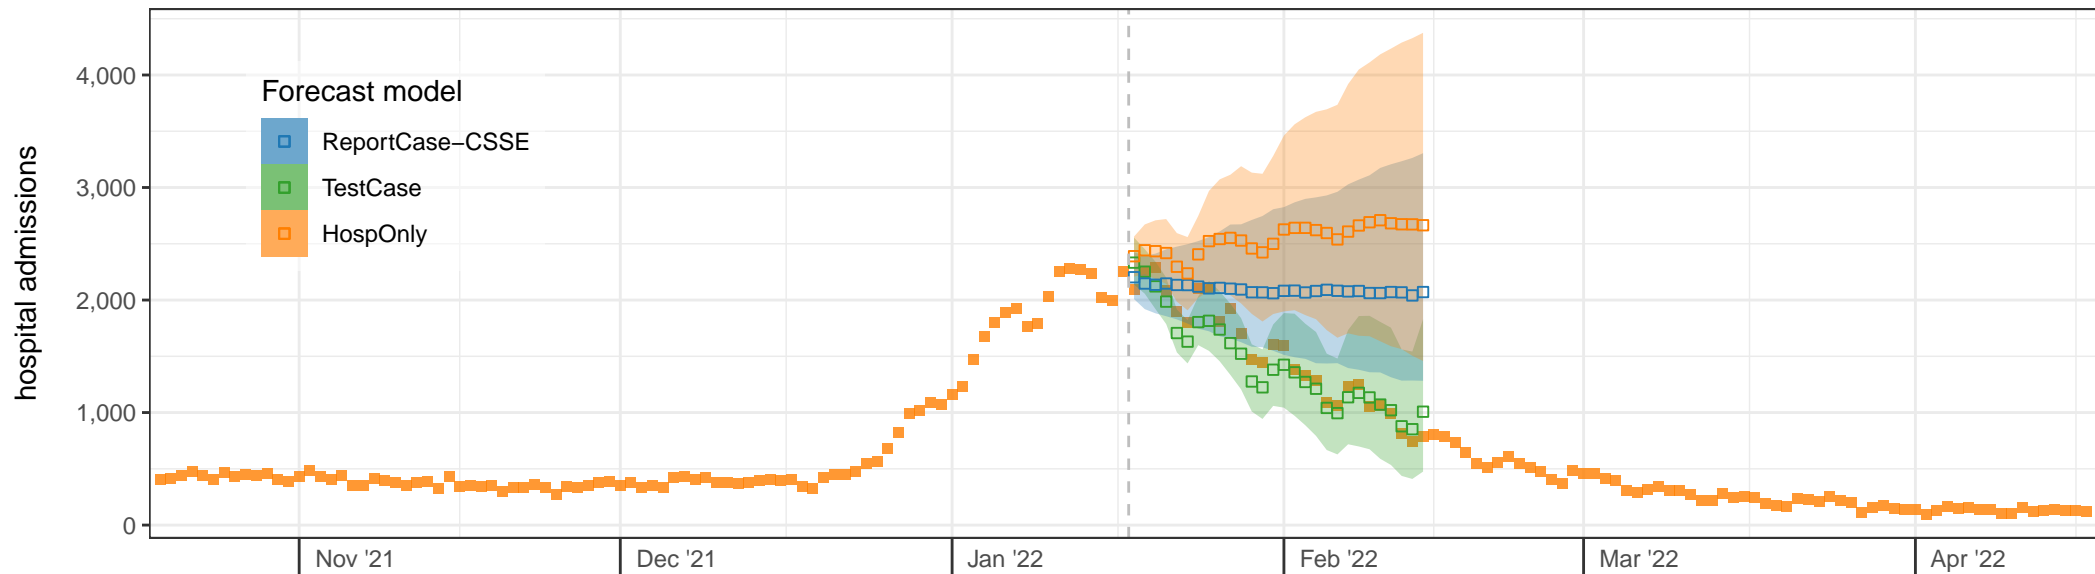

California case data and forecasts: 2022-01-24

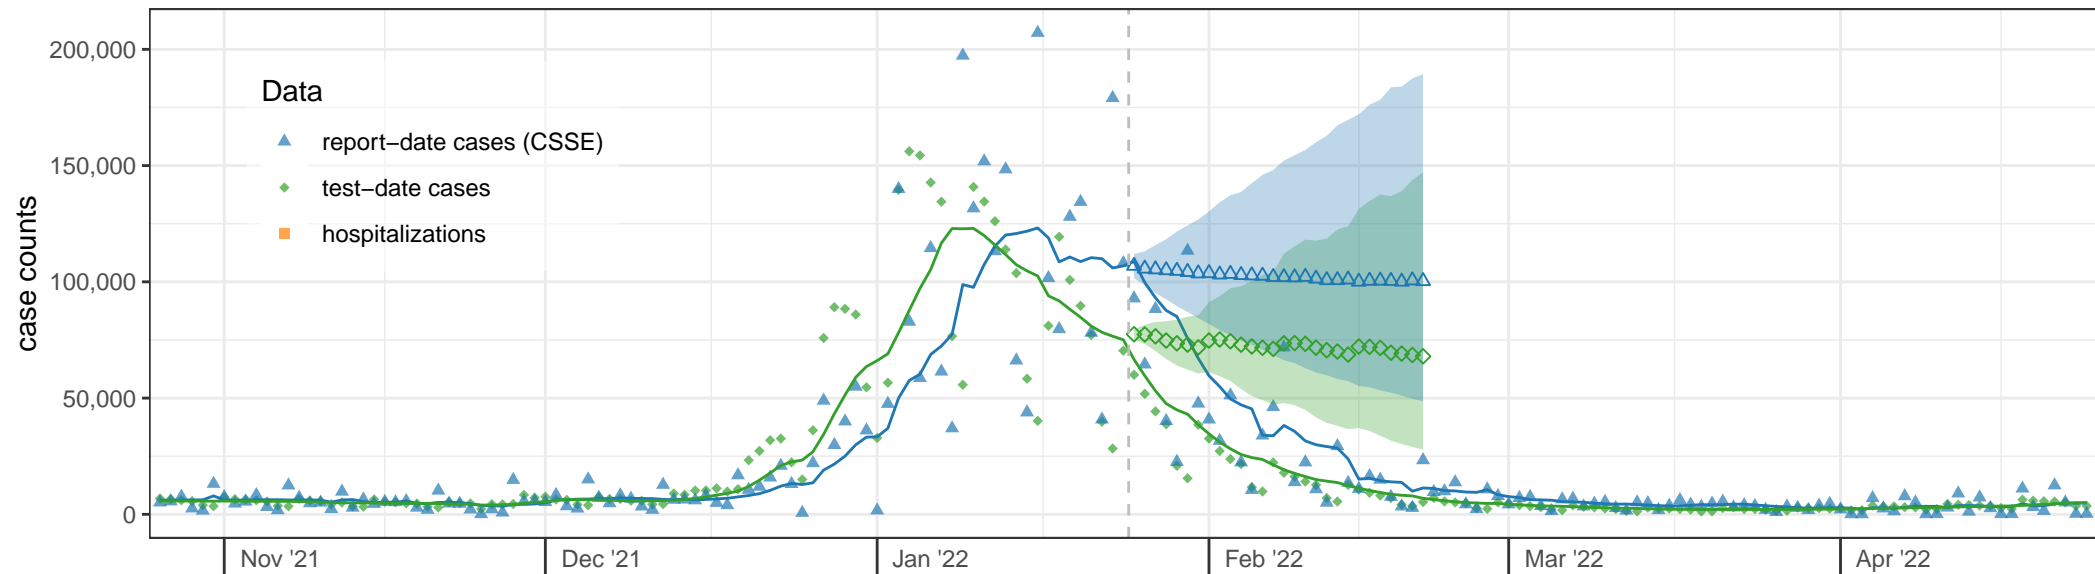

California hospitalization data and forecasts: 2022-01-24

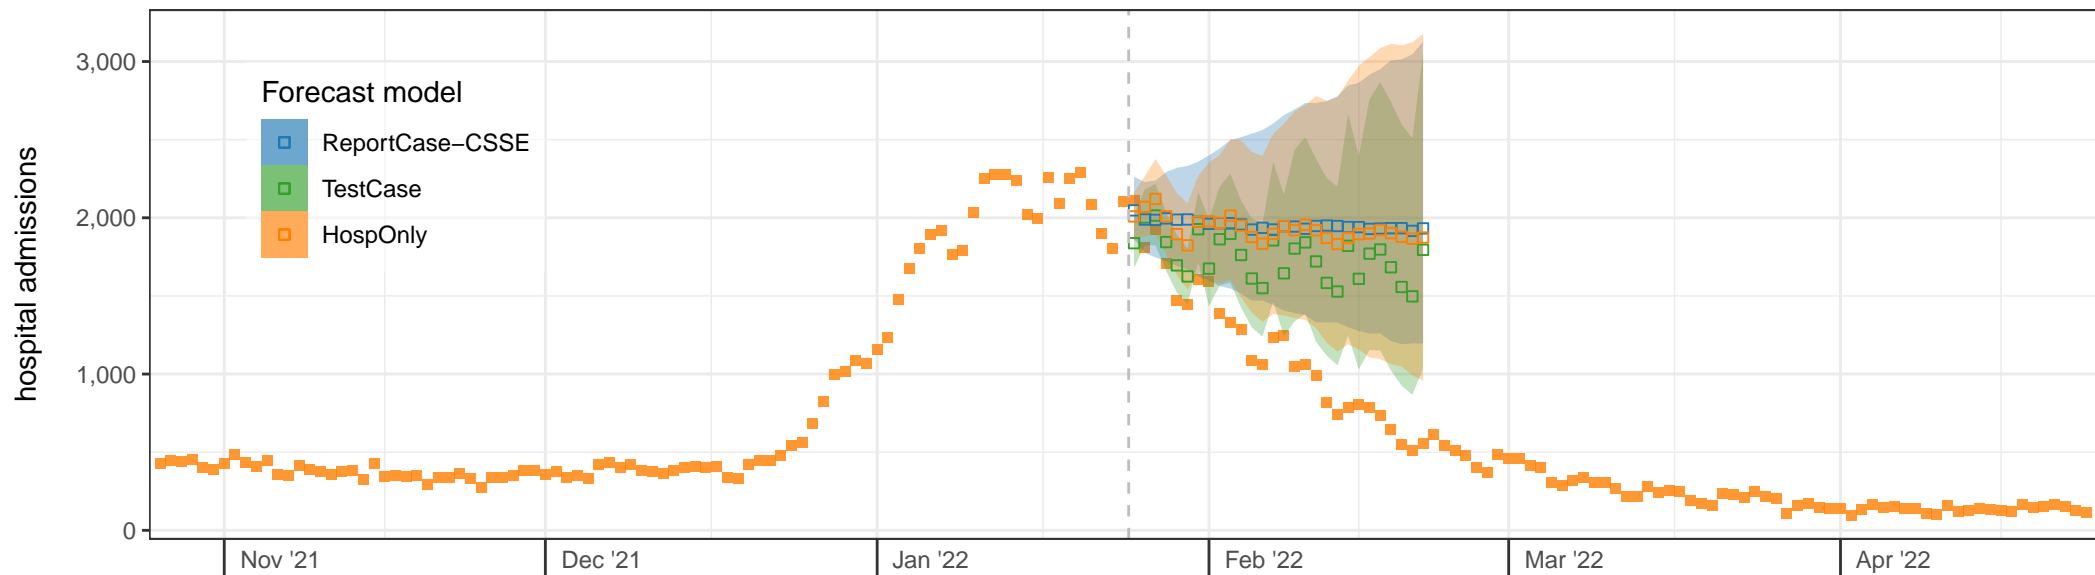

### California case data and forecasts: 2022-01-31

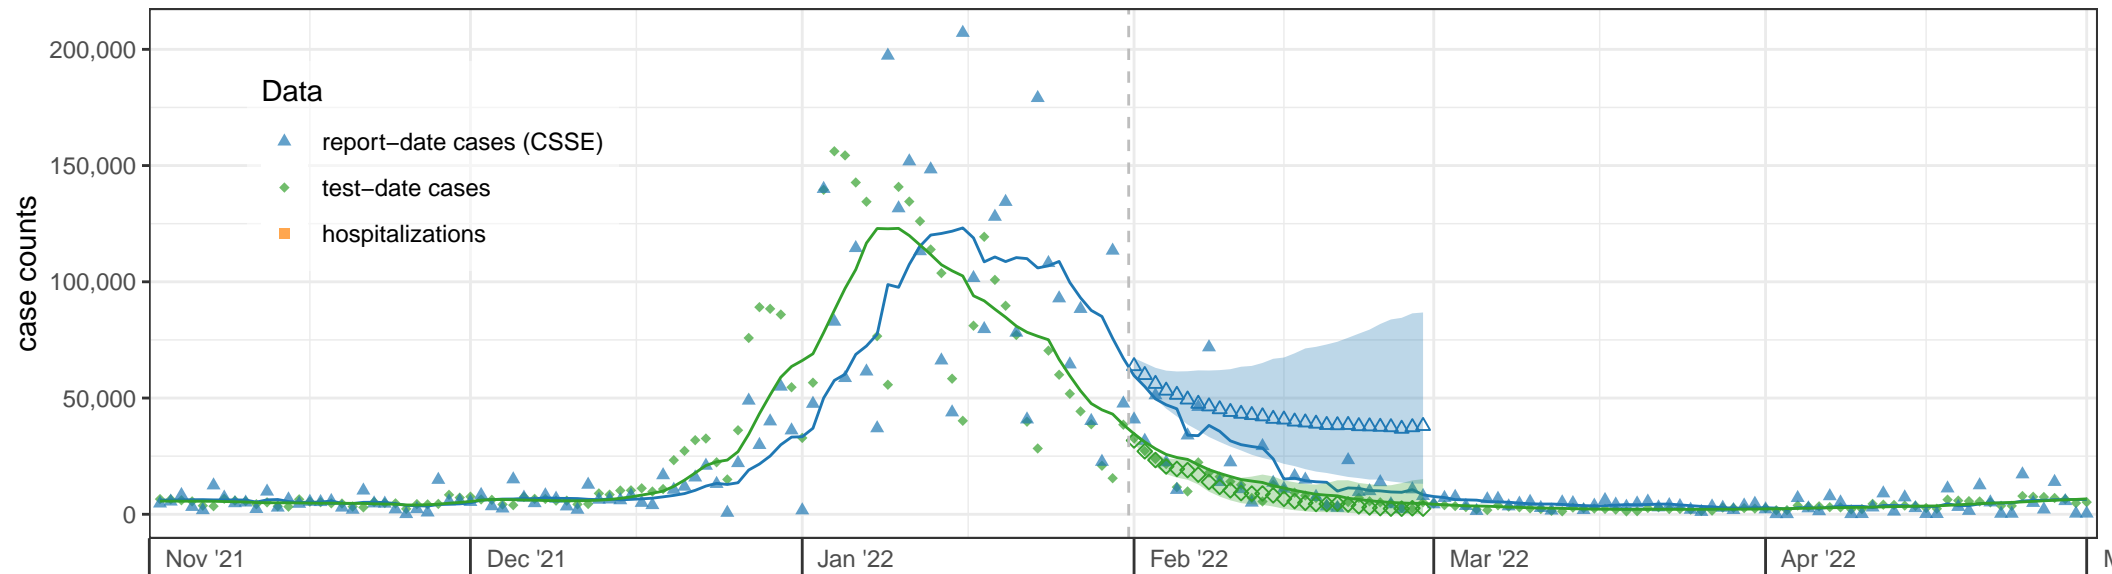

### California hospitalization data and forecasts: 2022-01-31

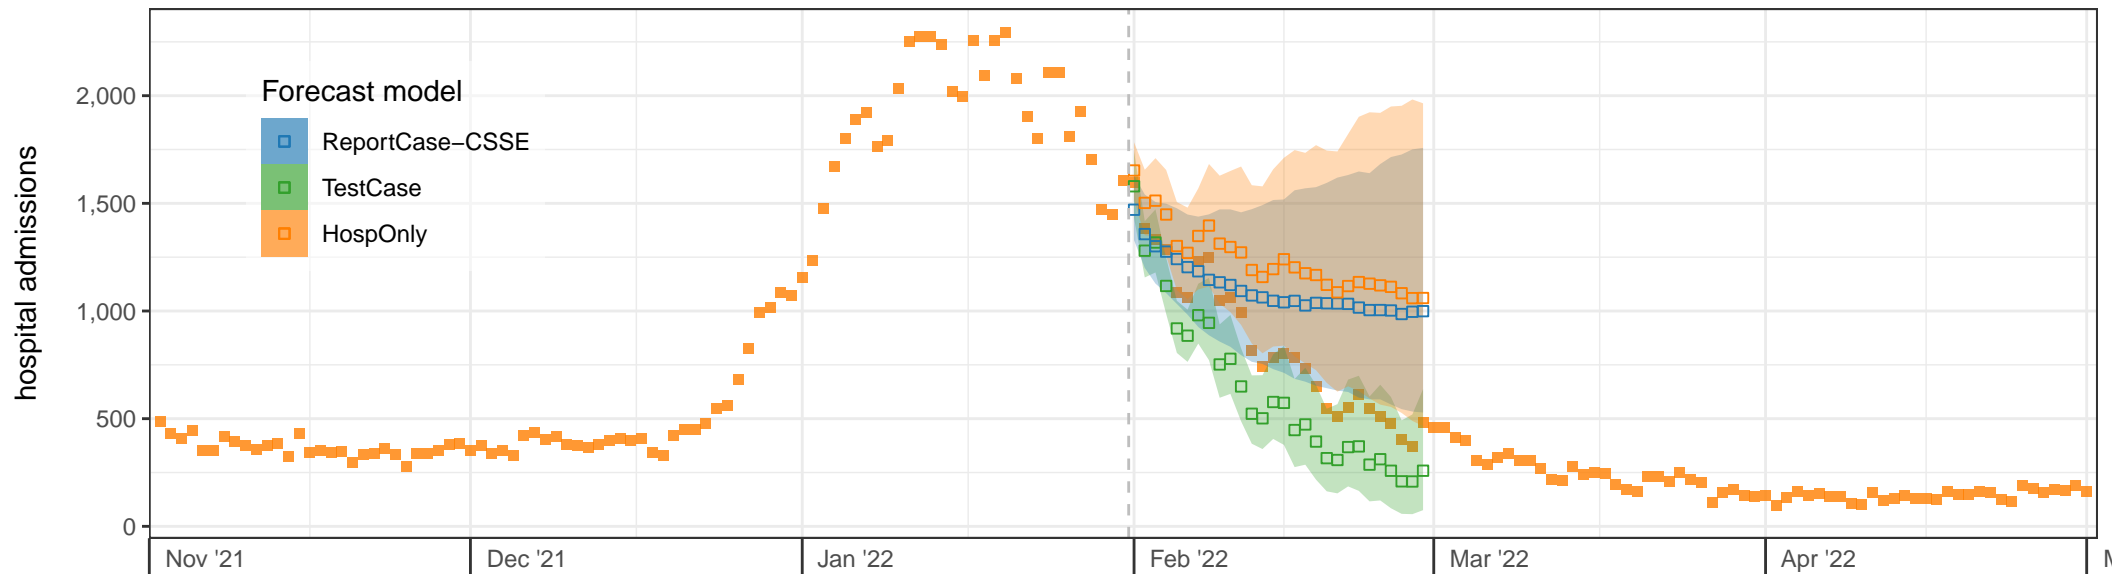

### California case data and forecasts: 2022-02-07

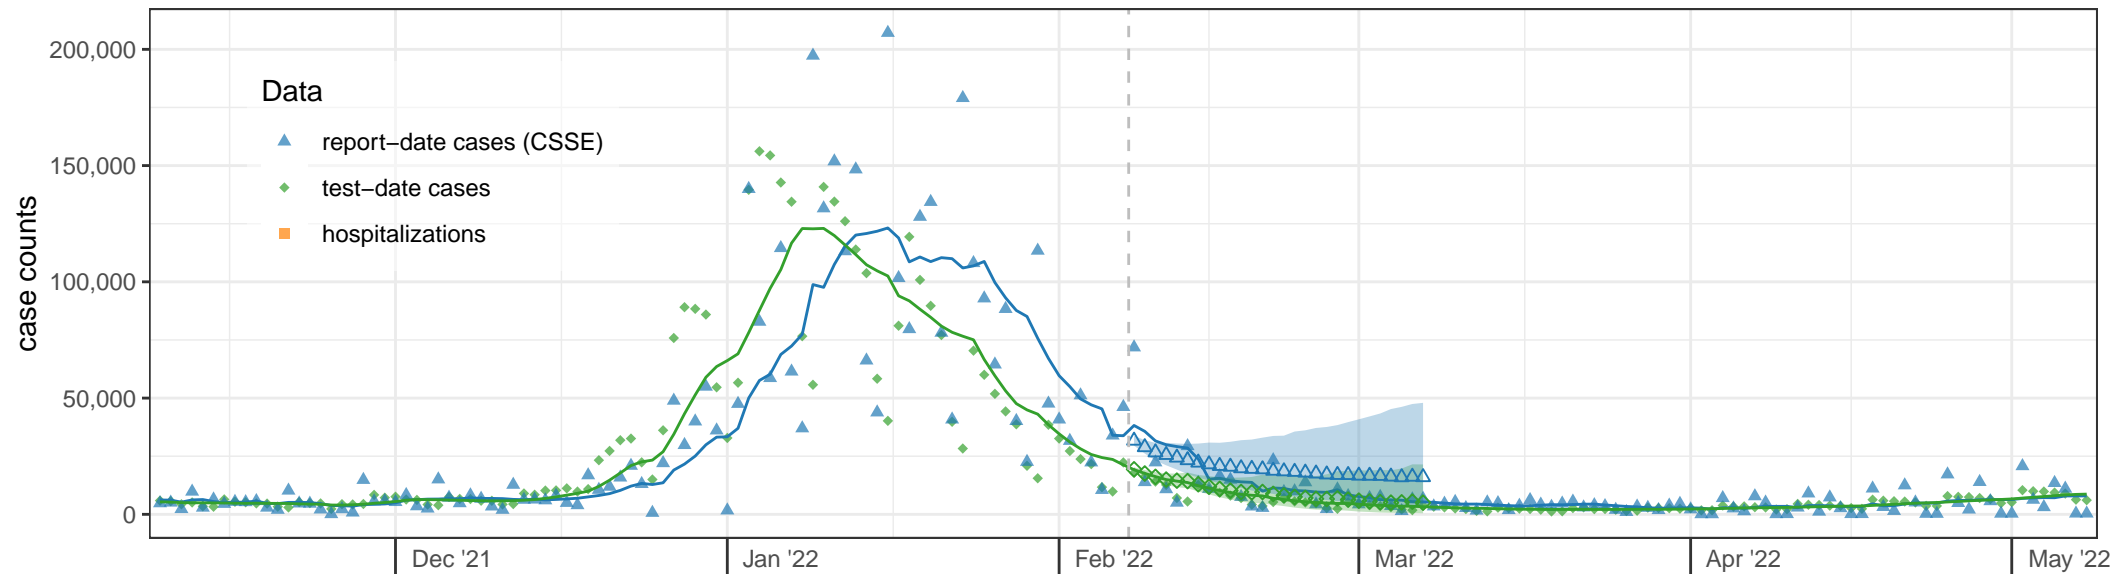

### California hospitalization data and forecasts: 2022-02-07

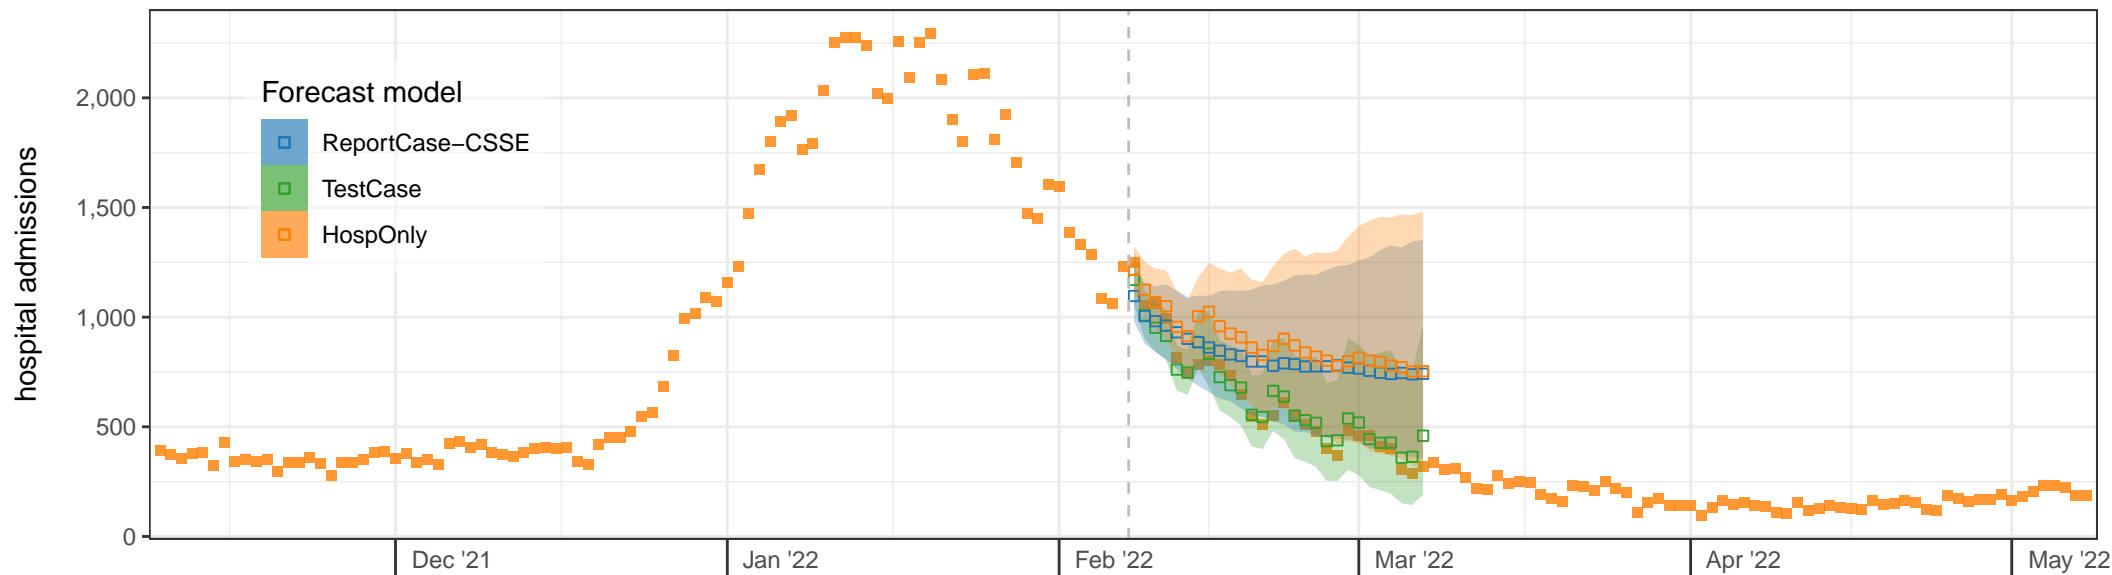

California case data and forecasts: 2022-02-14

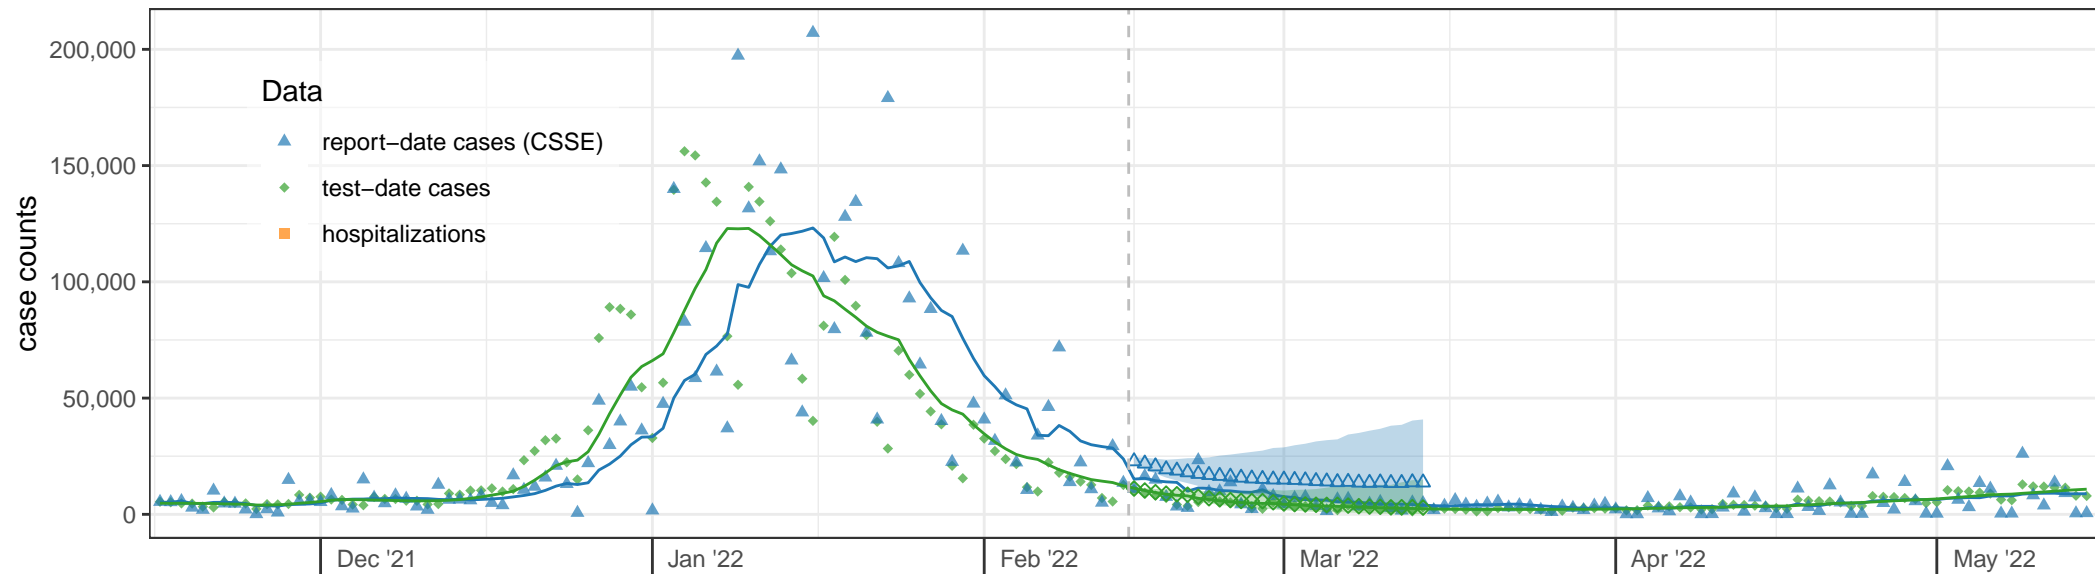

California hospitalization data and forecasts: 2022-02-14

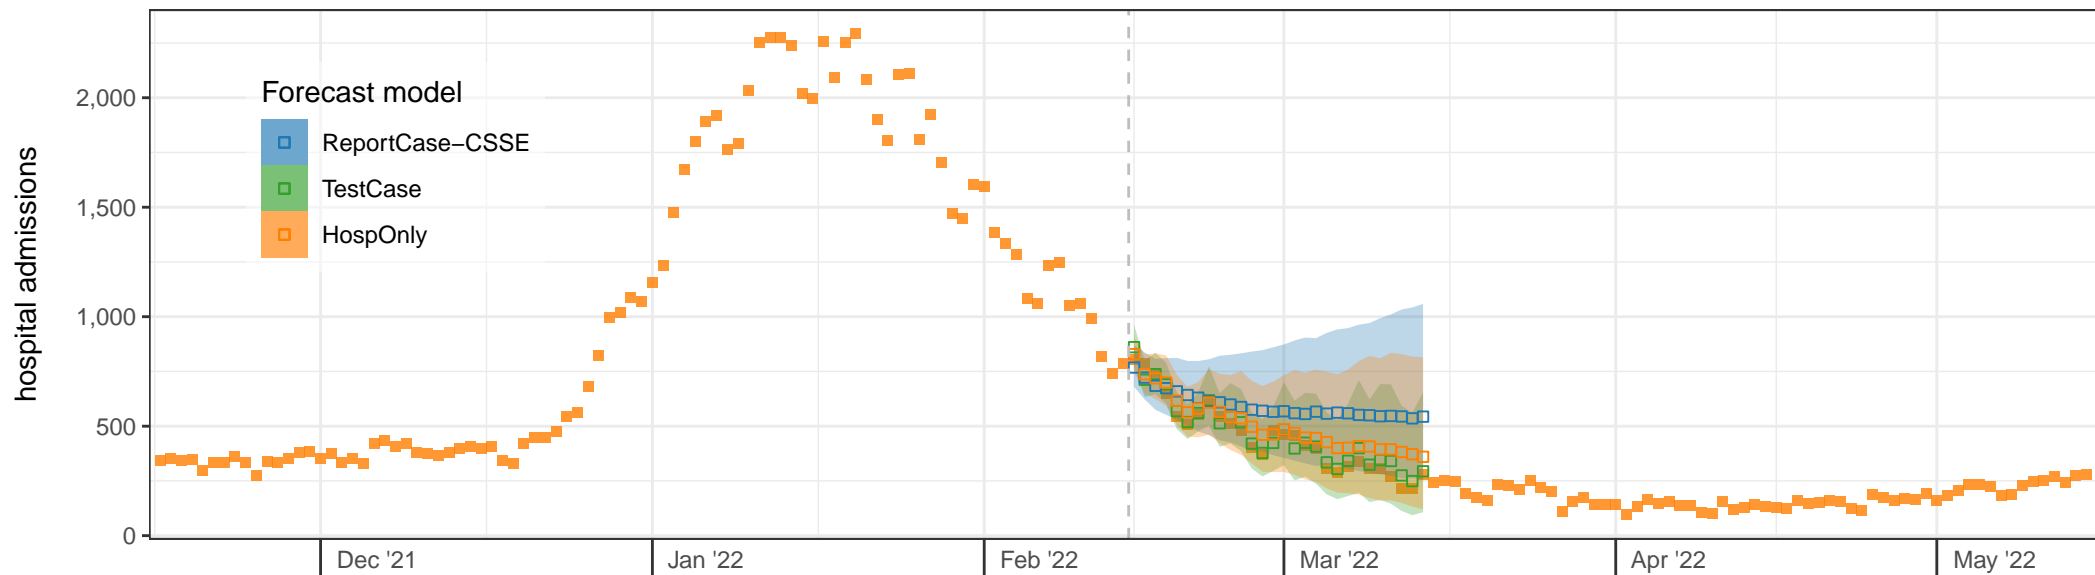

California case data and forecasts: 2022-02-21

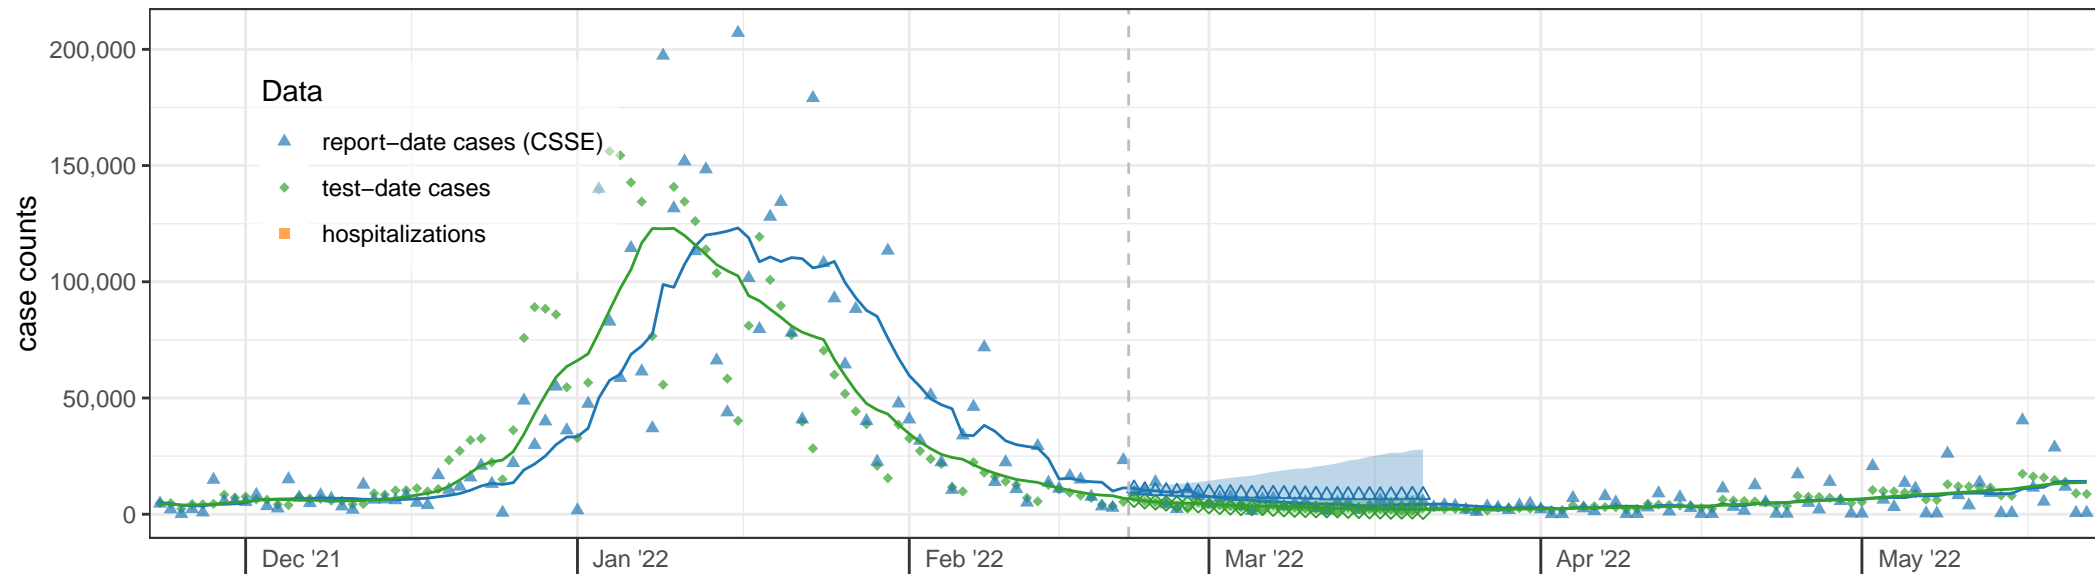

California hospitalization data and forecasts: 2022-02-21

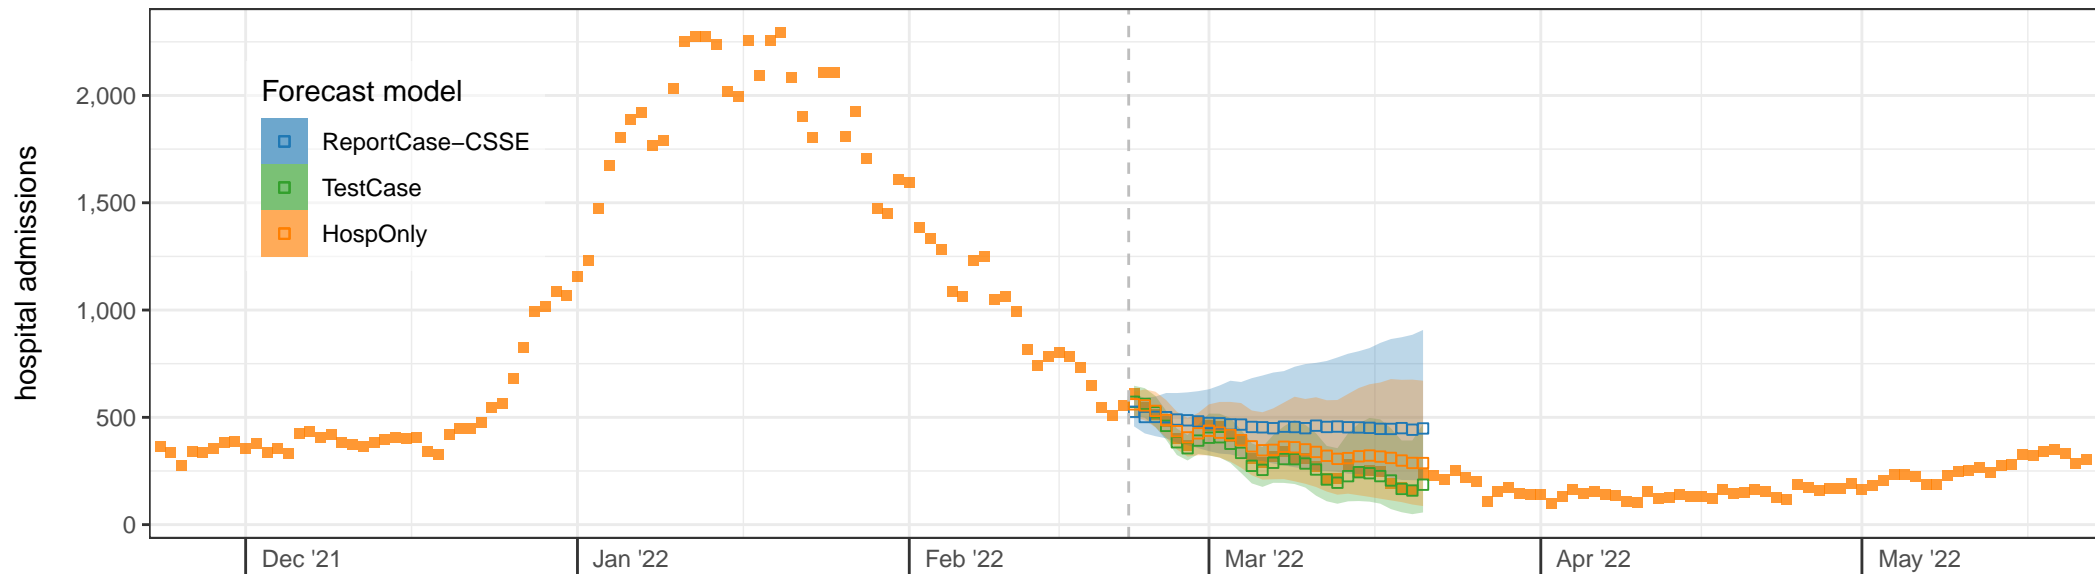



### California case data and forecasts: 2022-02-28

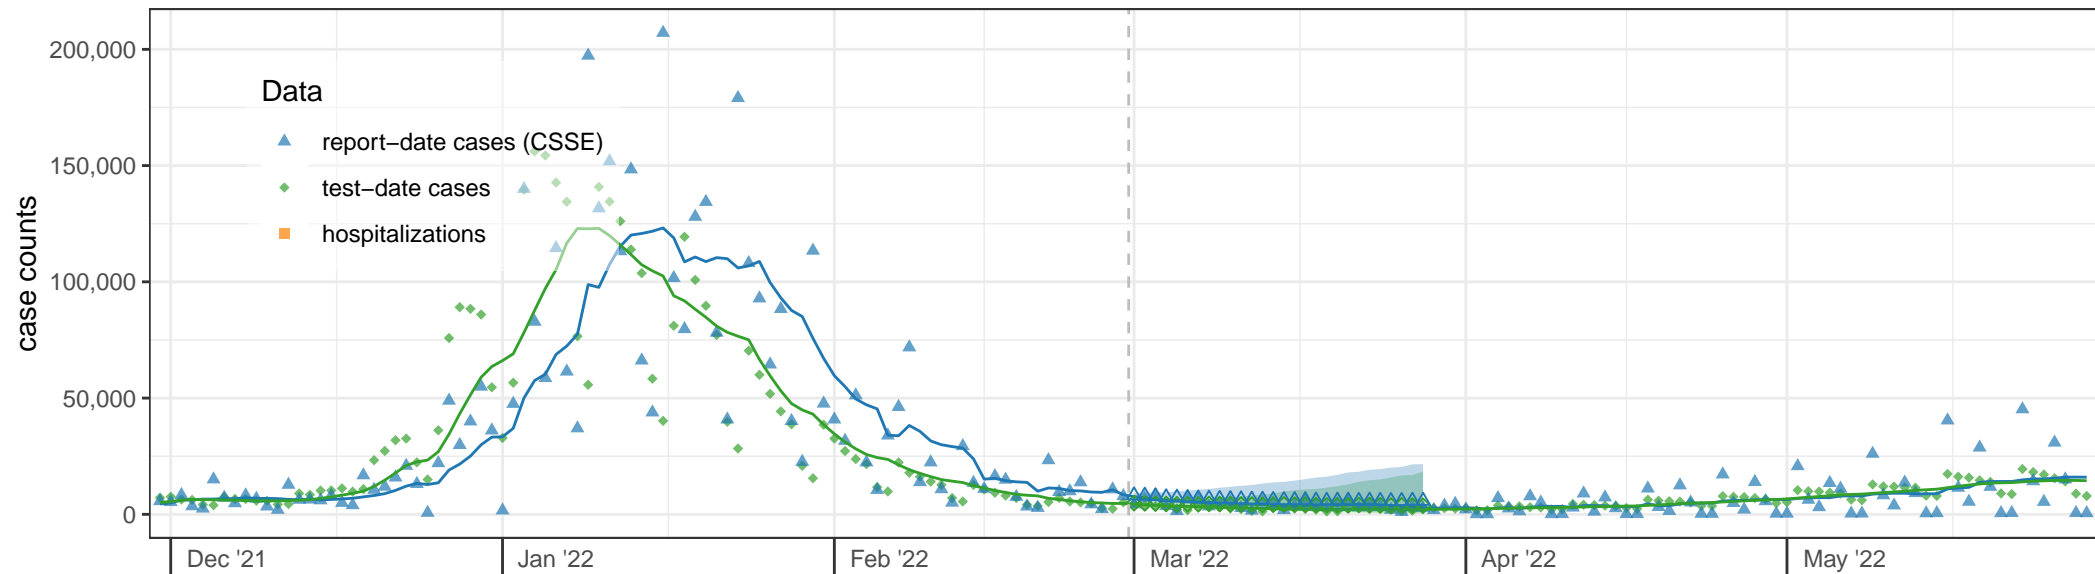

### California hospitalization data and forecasts: 2022-02-28

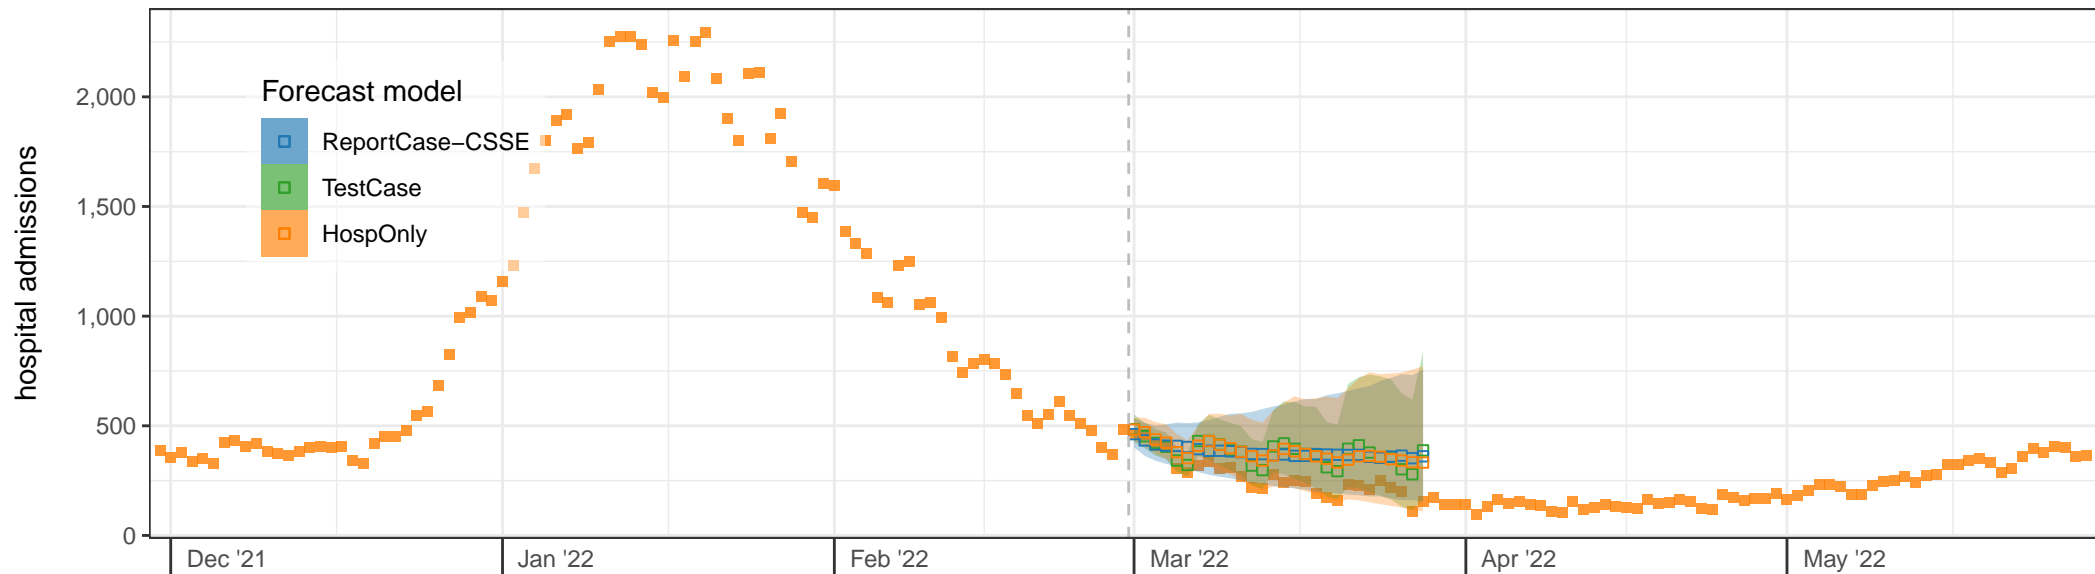

California case data and forecasts: 2022-03-07

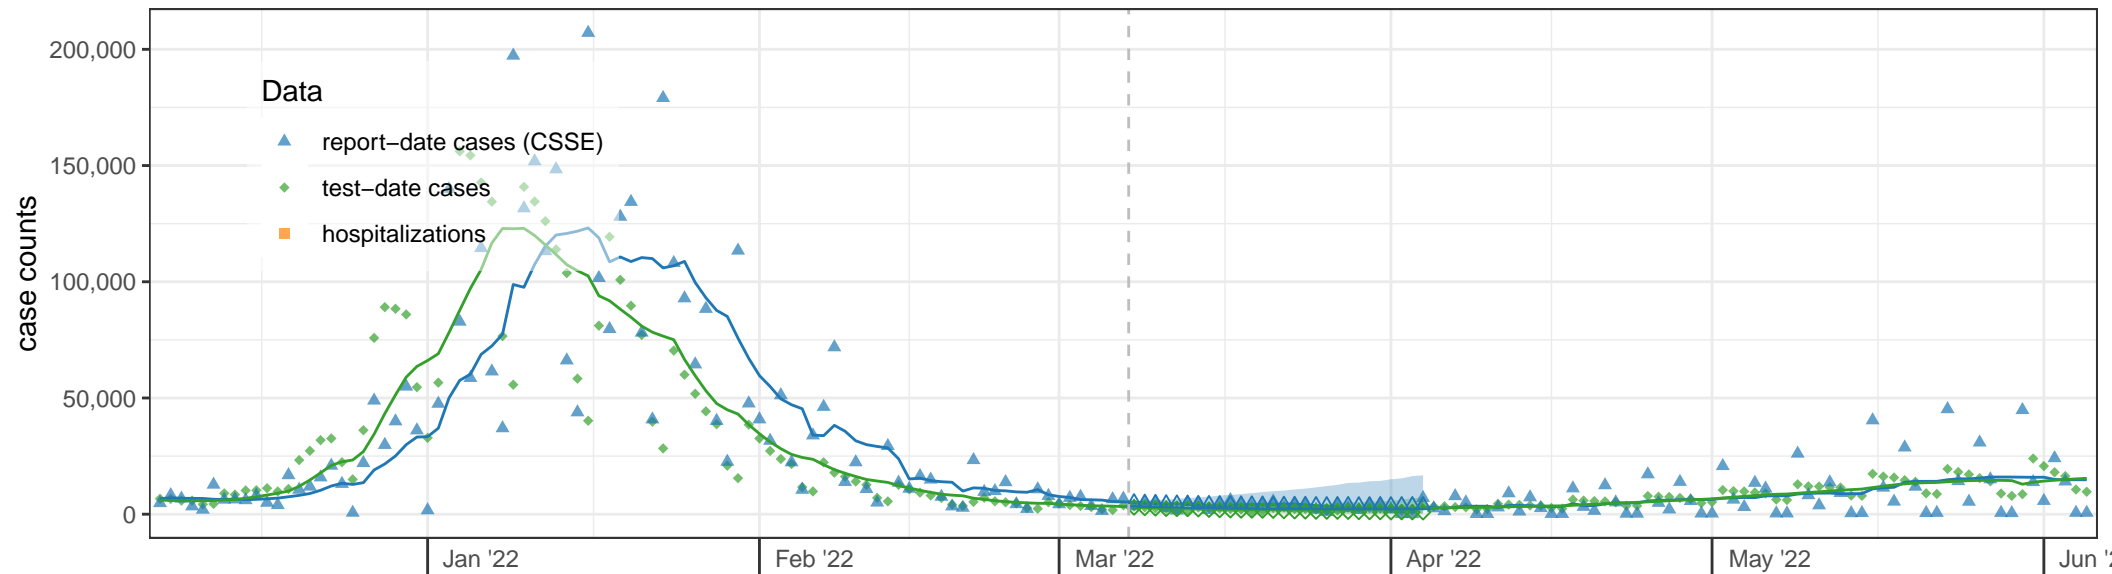

California hospitalization data and forecasts: 2022-03-07

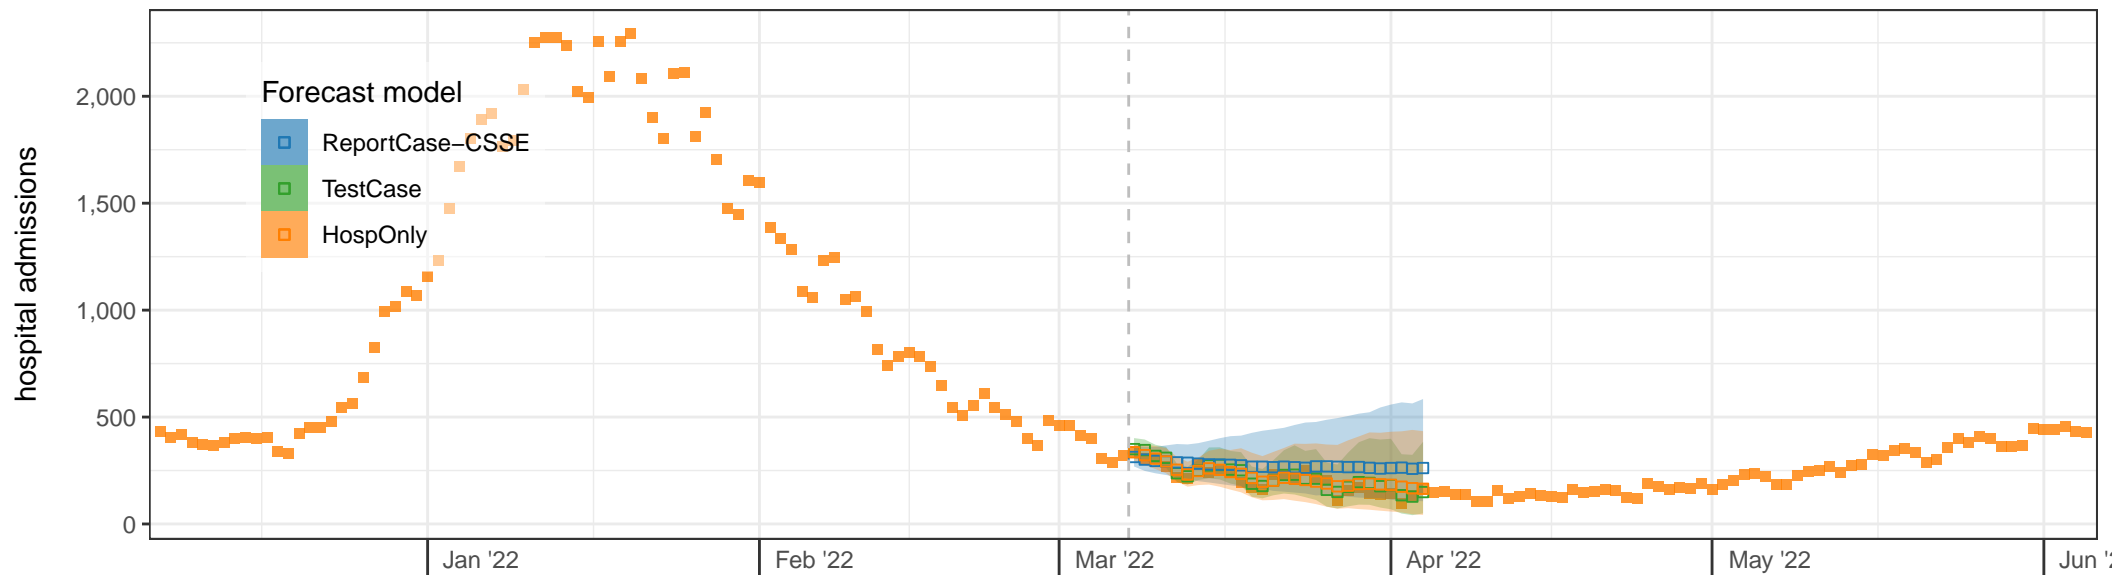

### California case data and forecasts: 2022-03-14

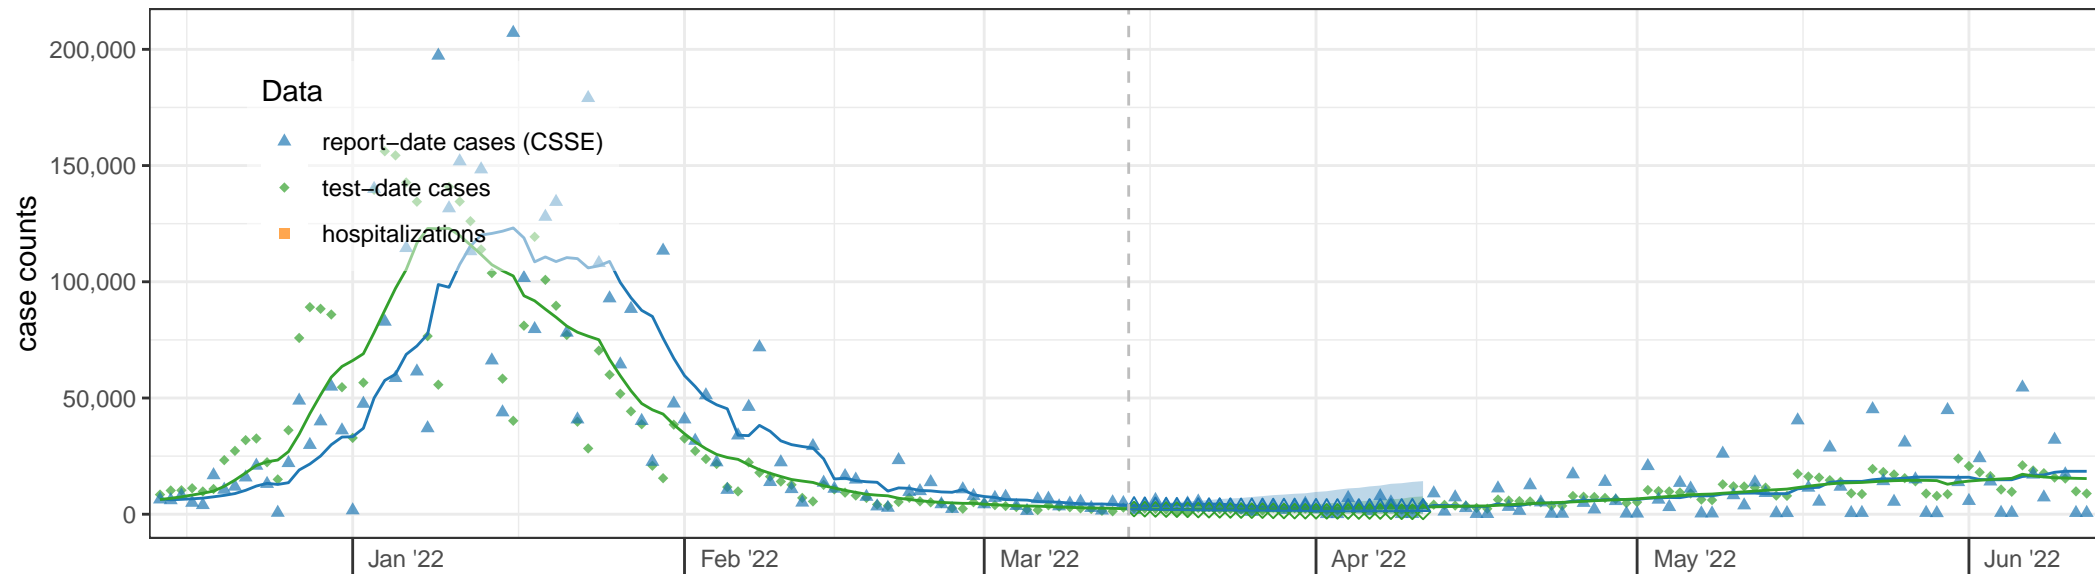

### California hospitalization data and forecasts: 2022-03-14

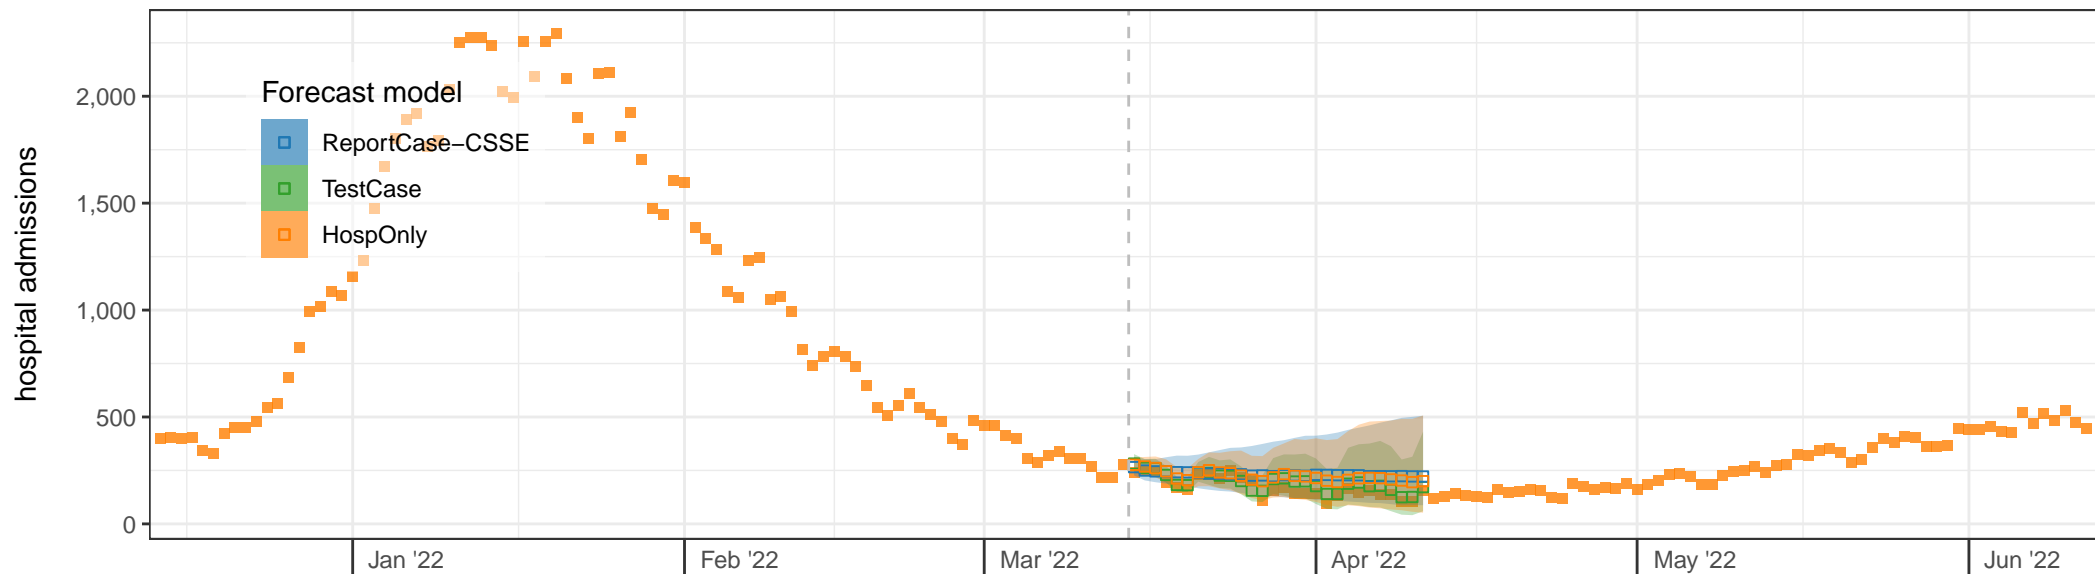

California case data and forecasts: 2022-03-21

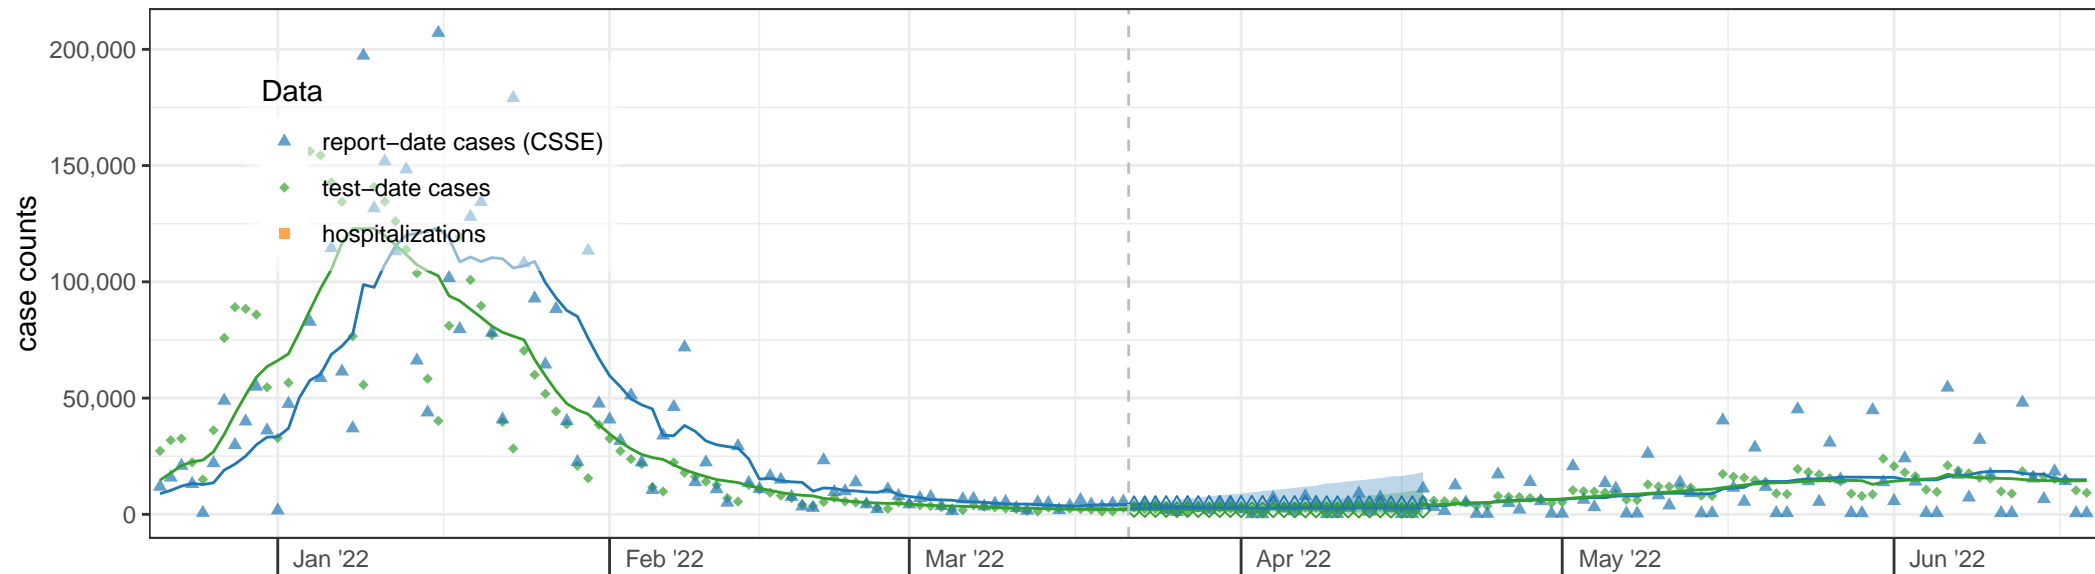

California hospitalization data and forecasts: 2022-03-21

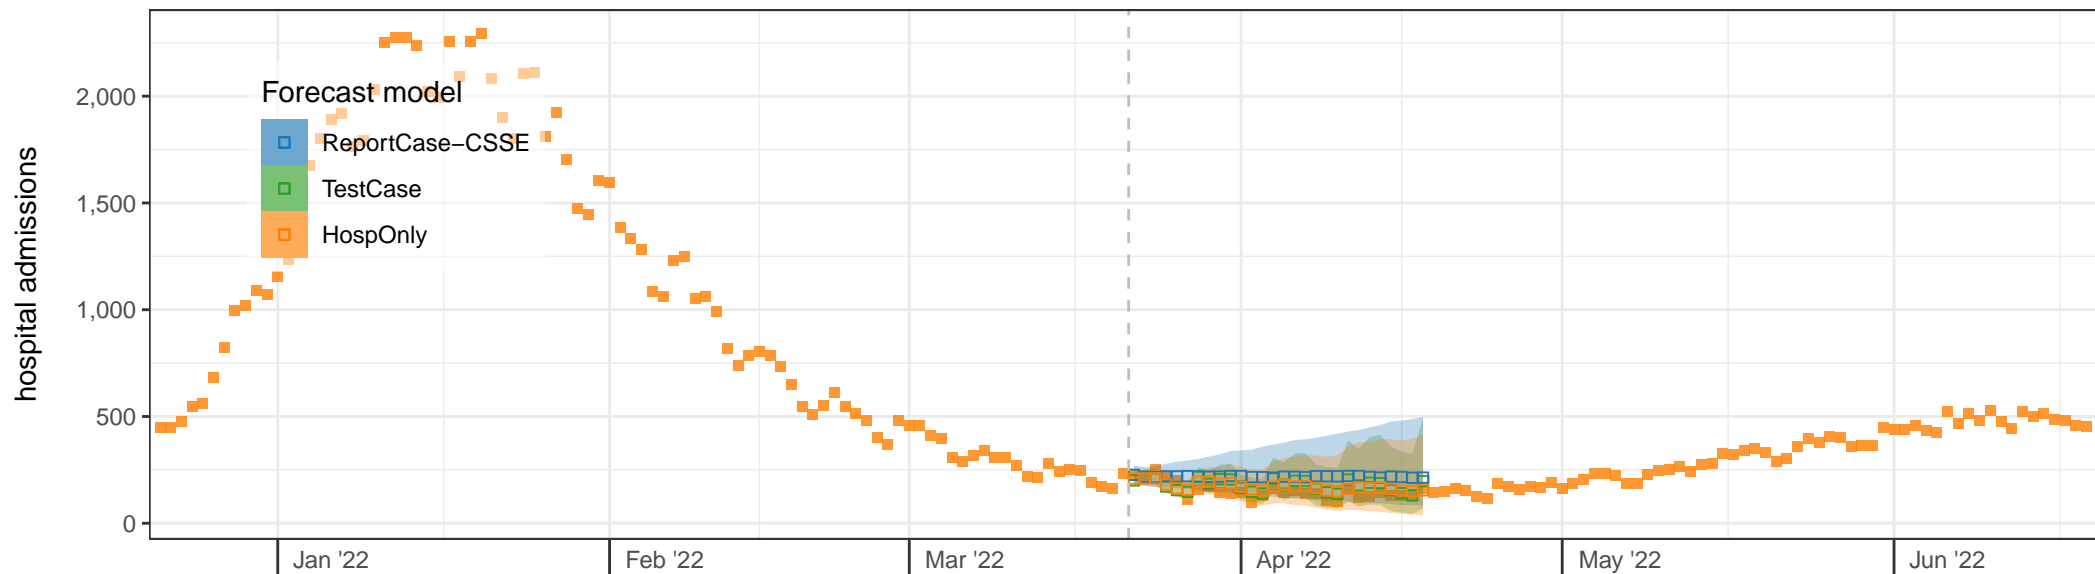

### California case data and forecasts: 2022-03-28

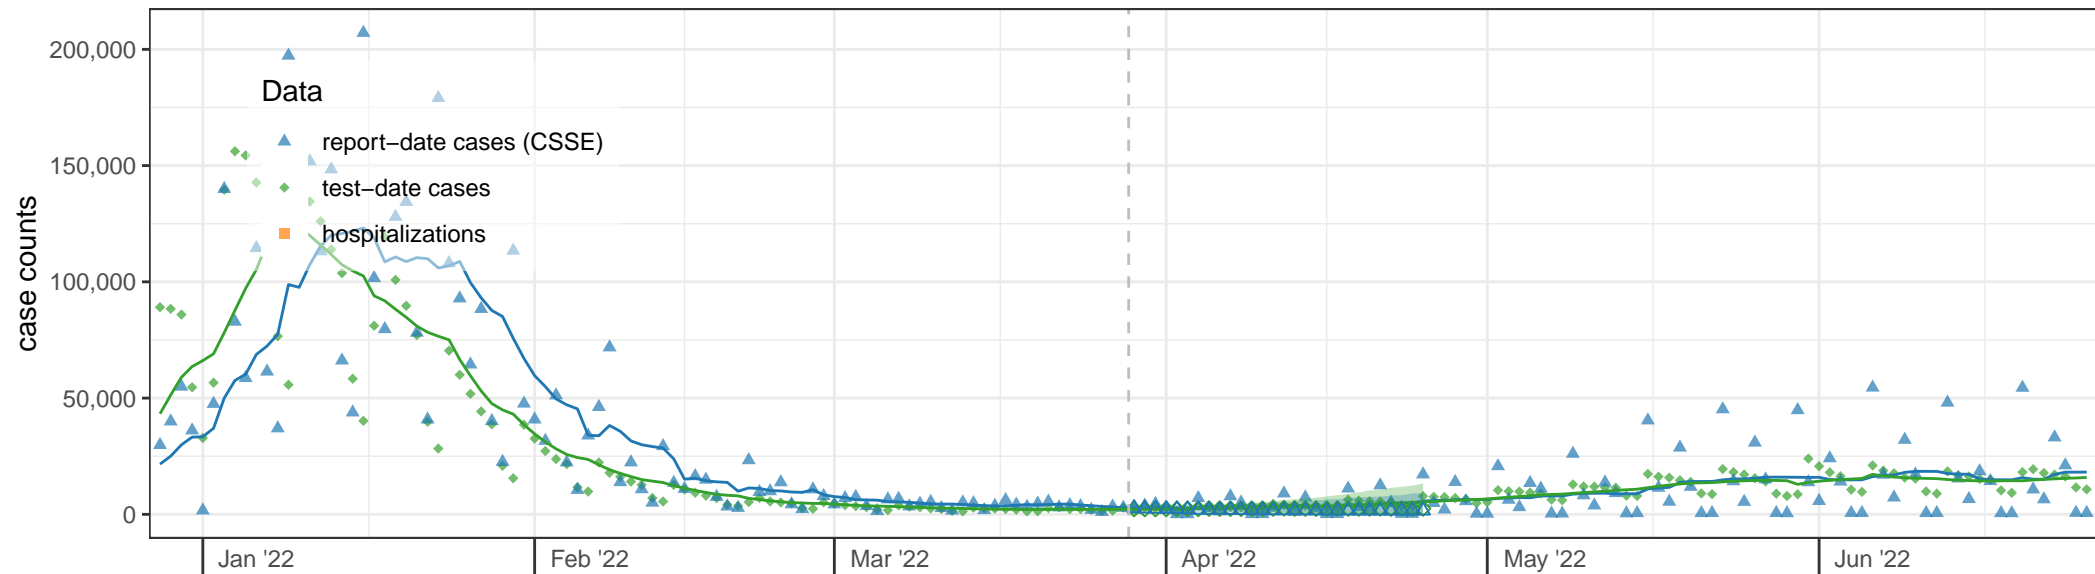

### California hospitalization data and forecasts: 2022-03-28

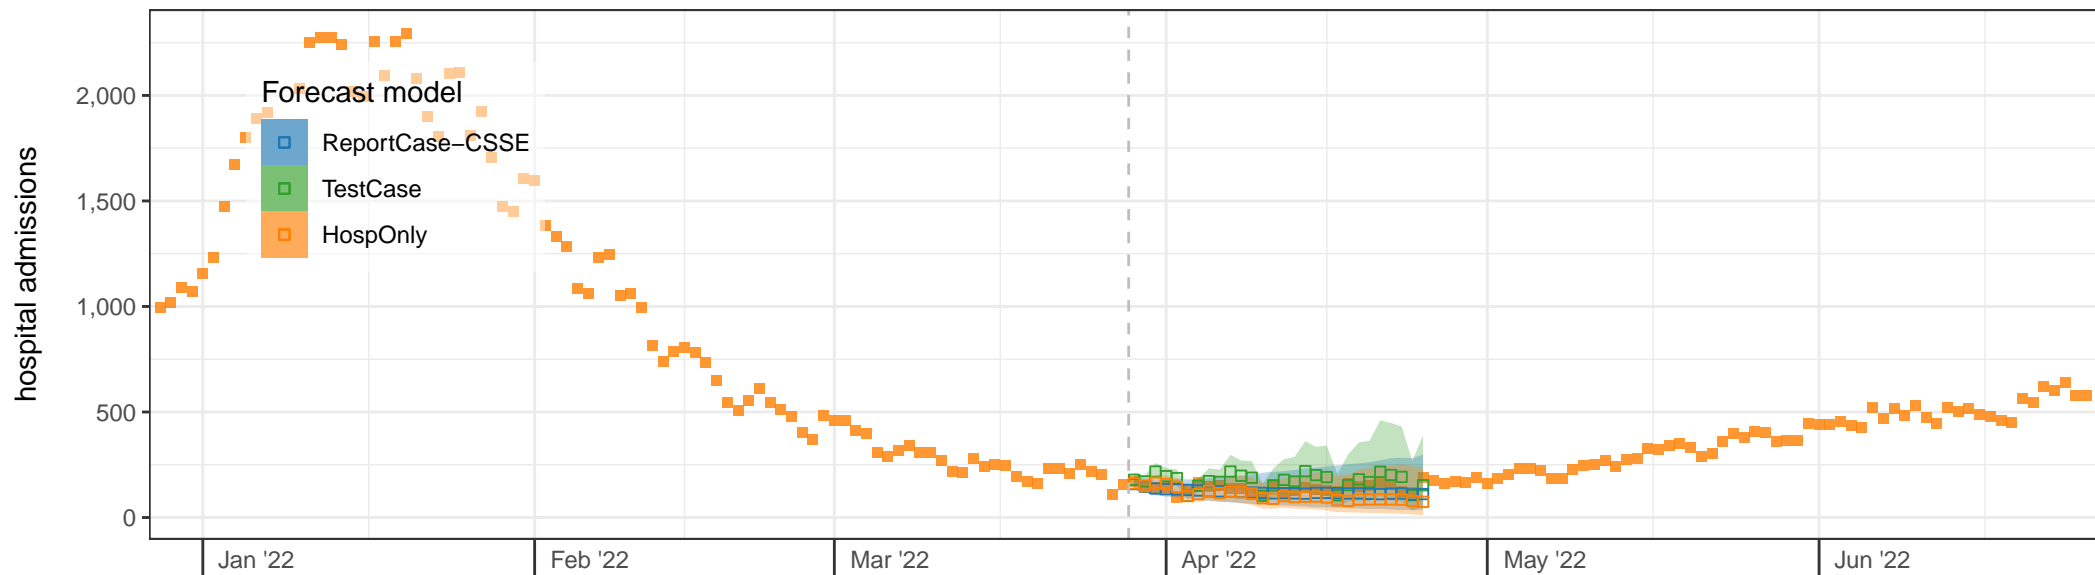

California case data and forecasts: 2022-04-04

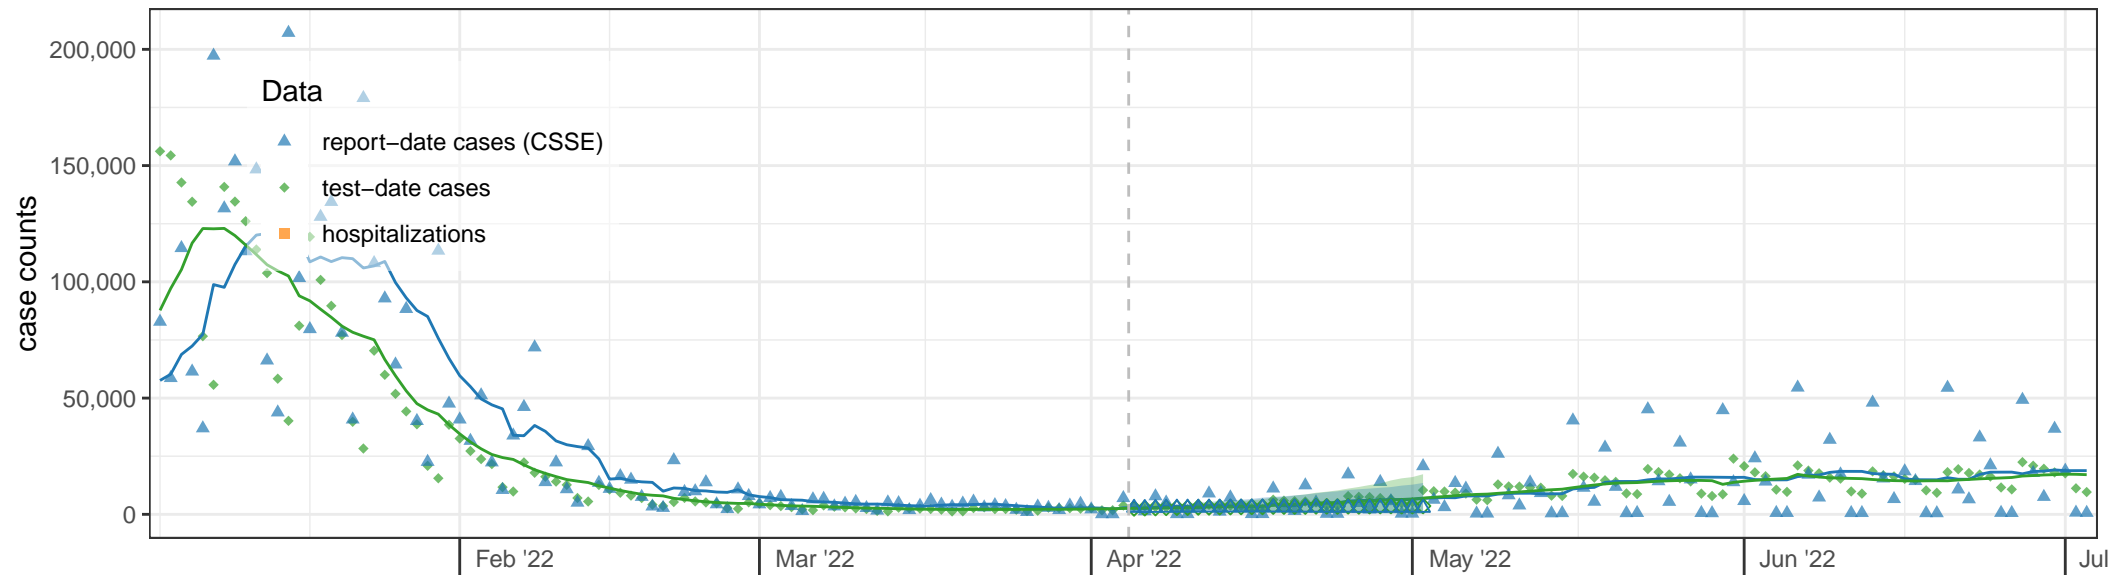

California hospitalization data and forecasts: 2022-04-04

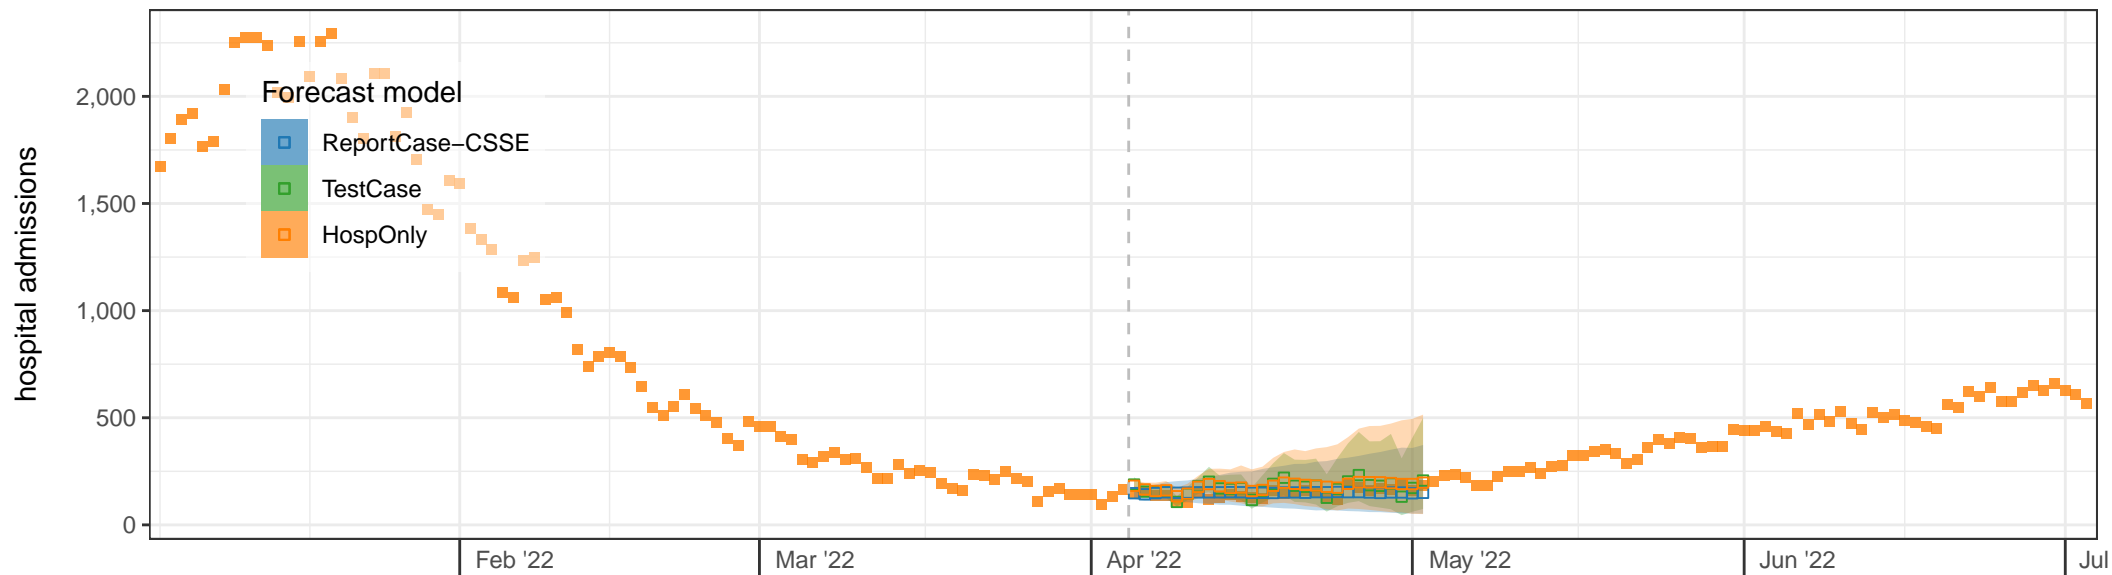

### California case data and forecasts: 2022-04-11

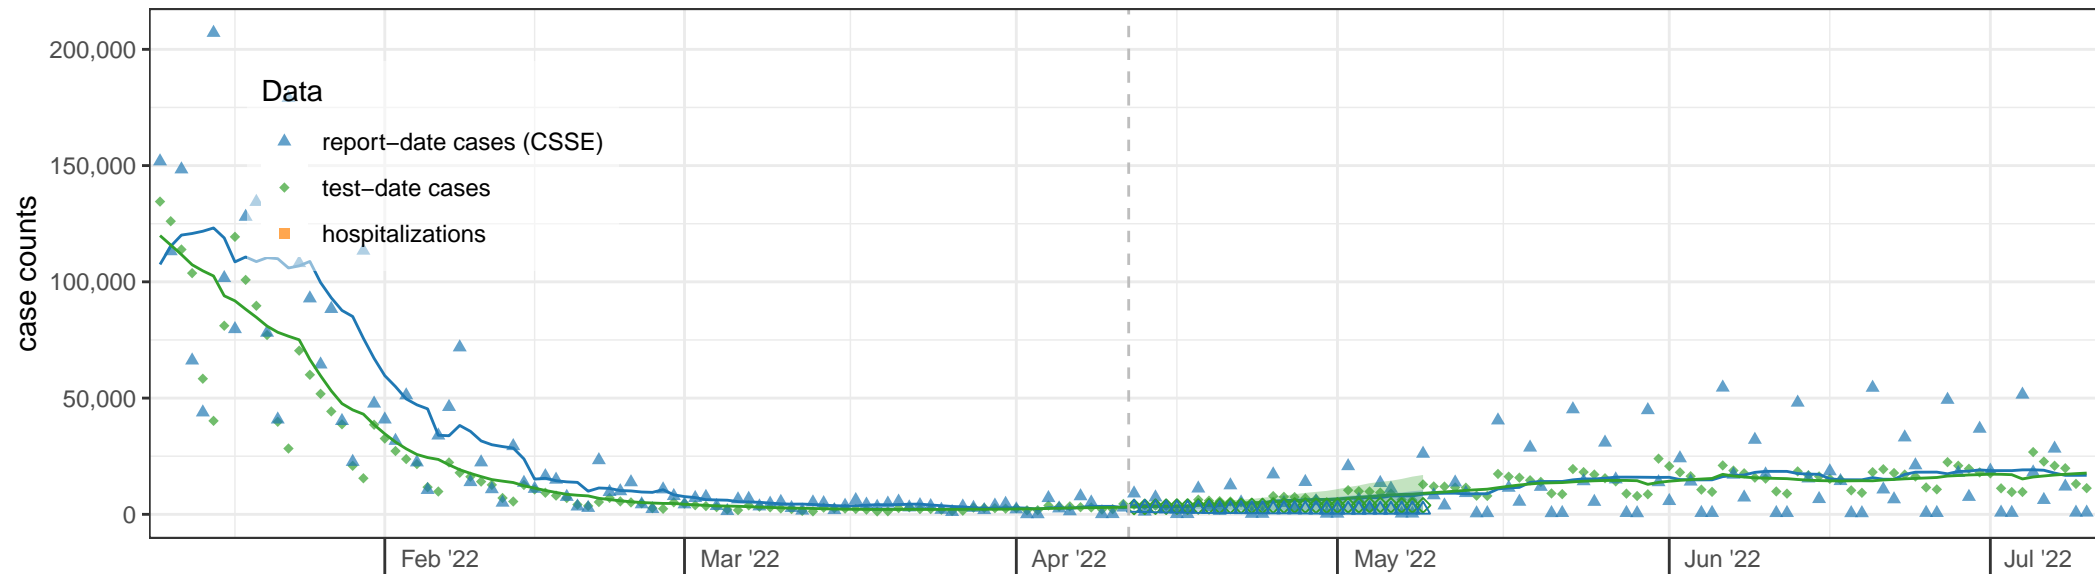

### California hospitalization data and forecasts: 2022-04-11

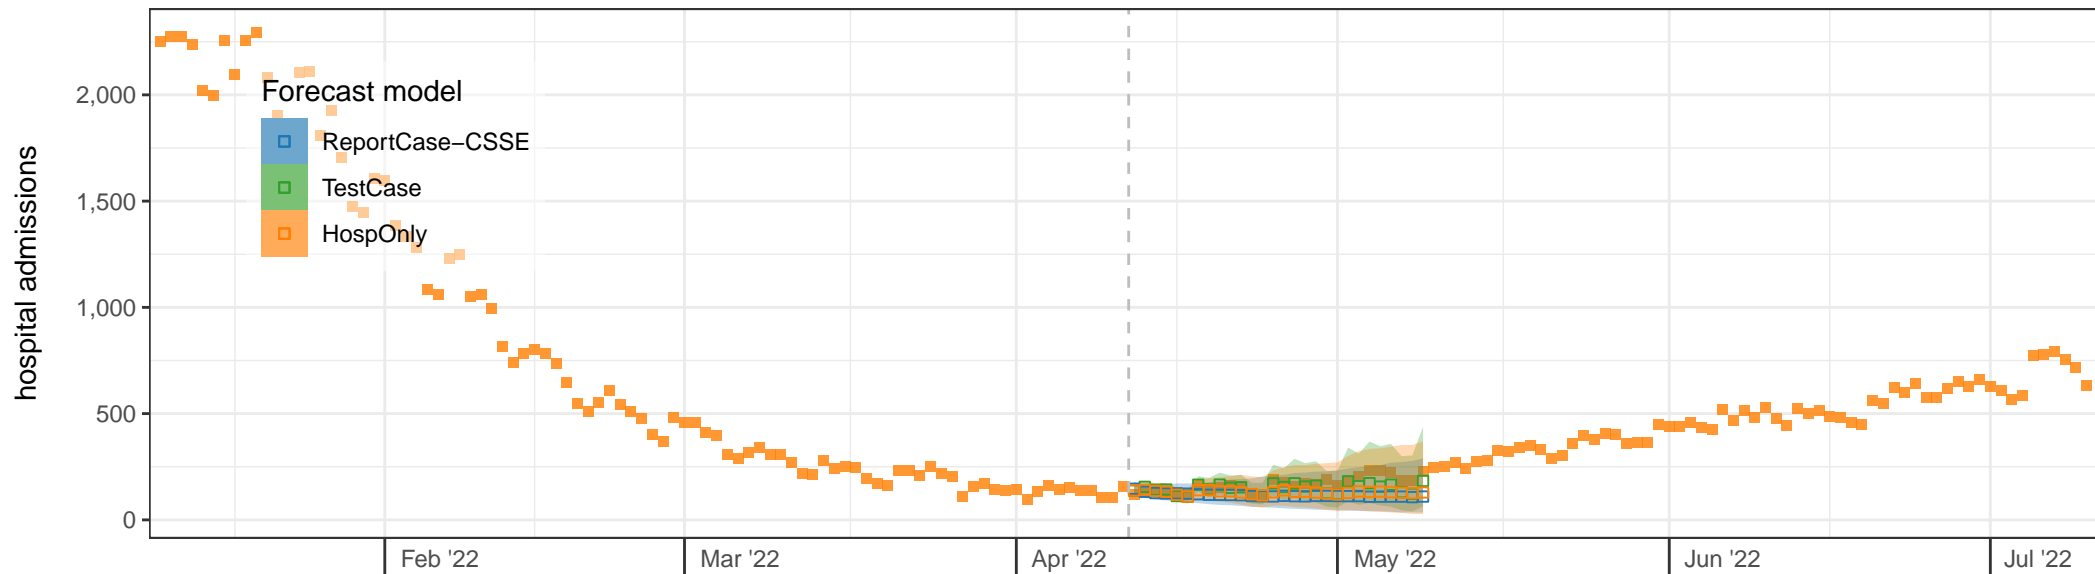

California case data and forecasts: 2022-04-18

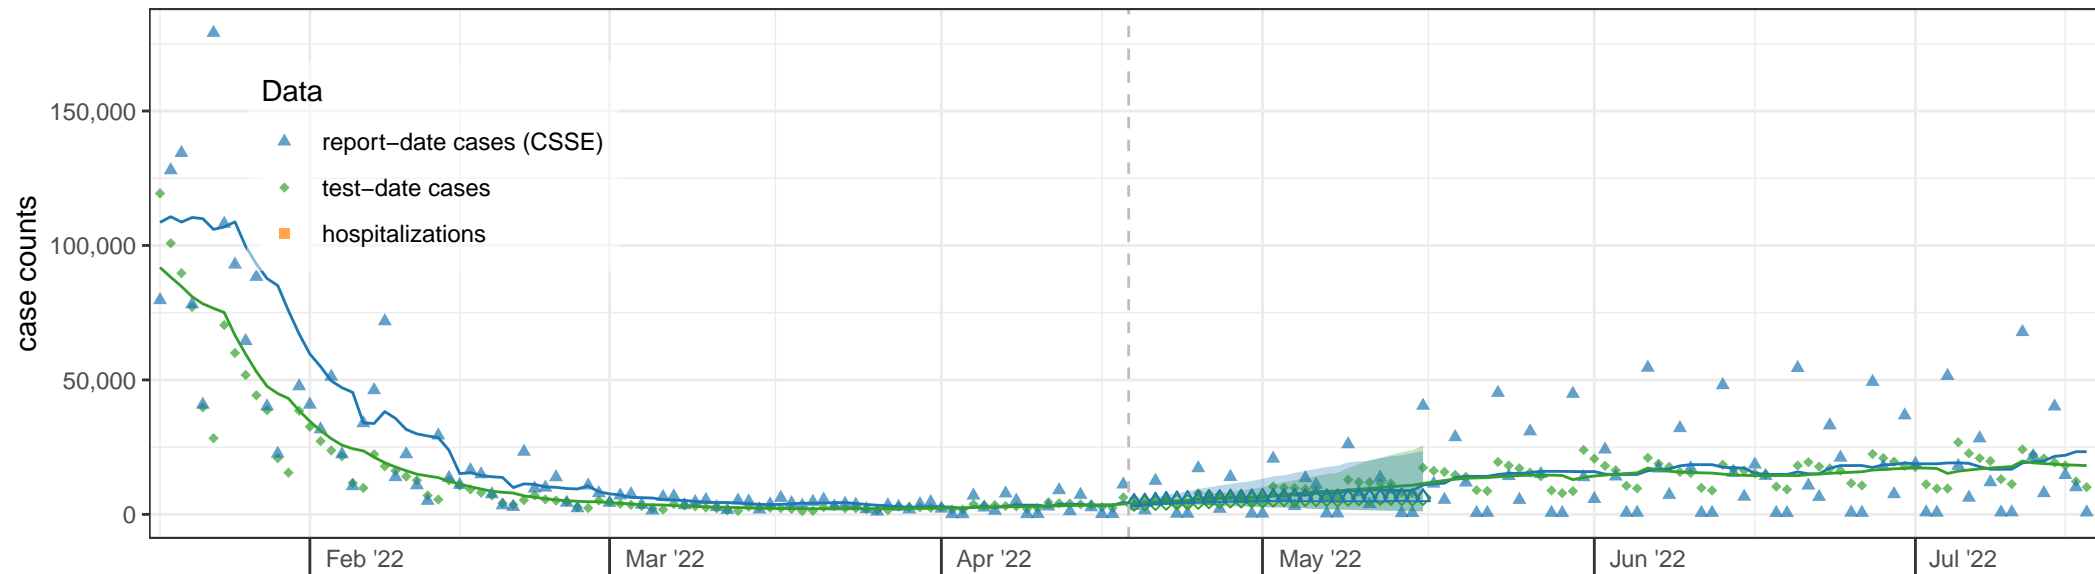

California hospitalization data and forecasts: 2022-04-18

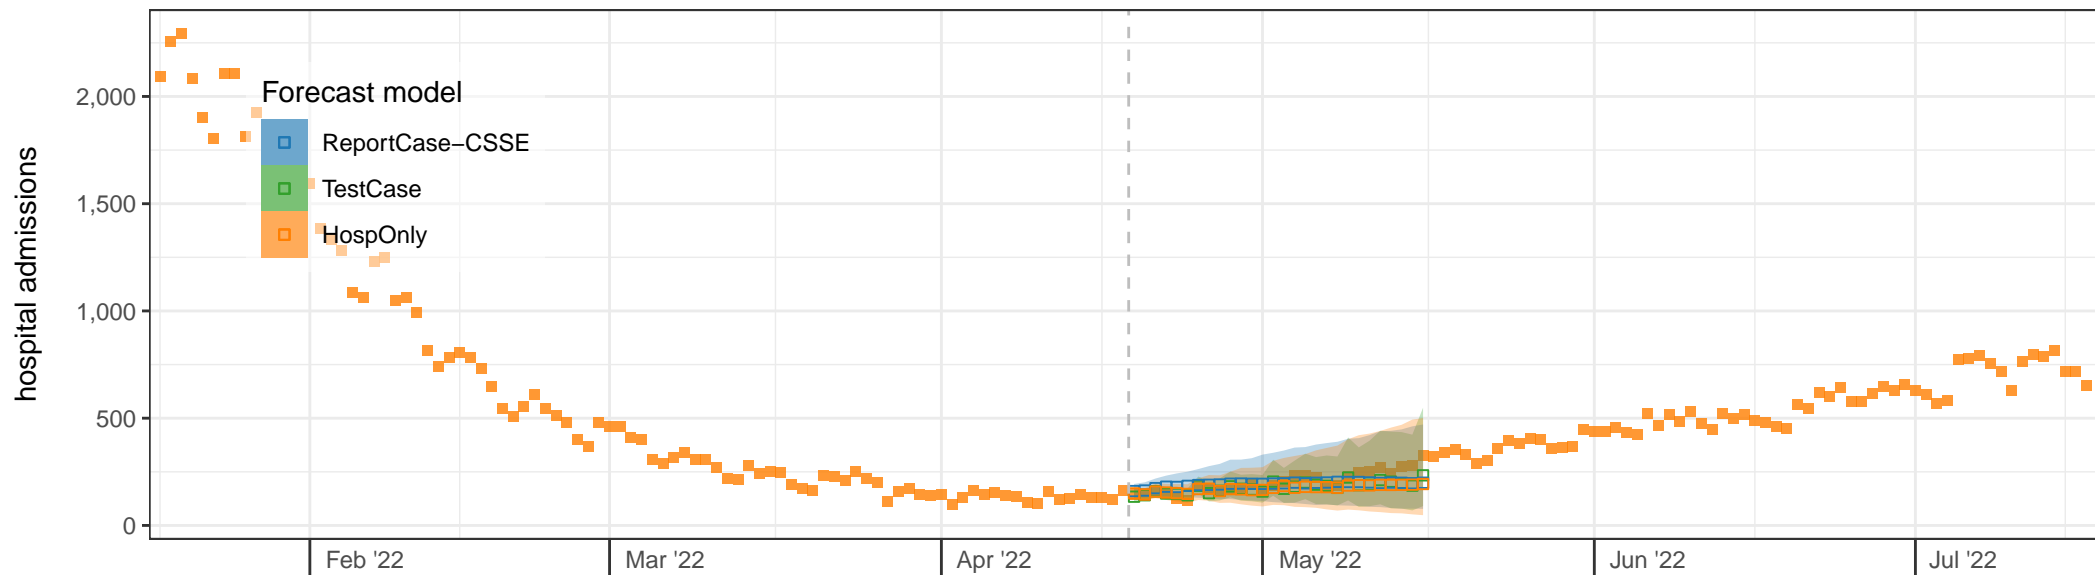



California case data and forecasts: 2022-04-25

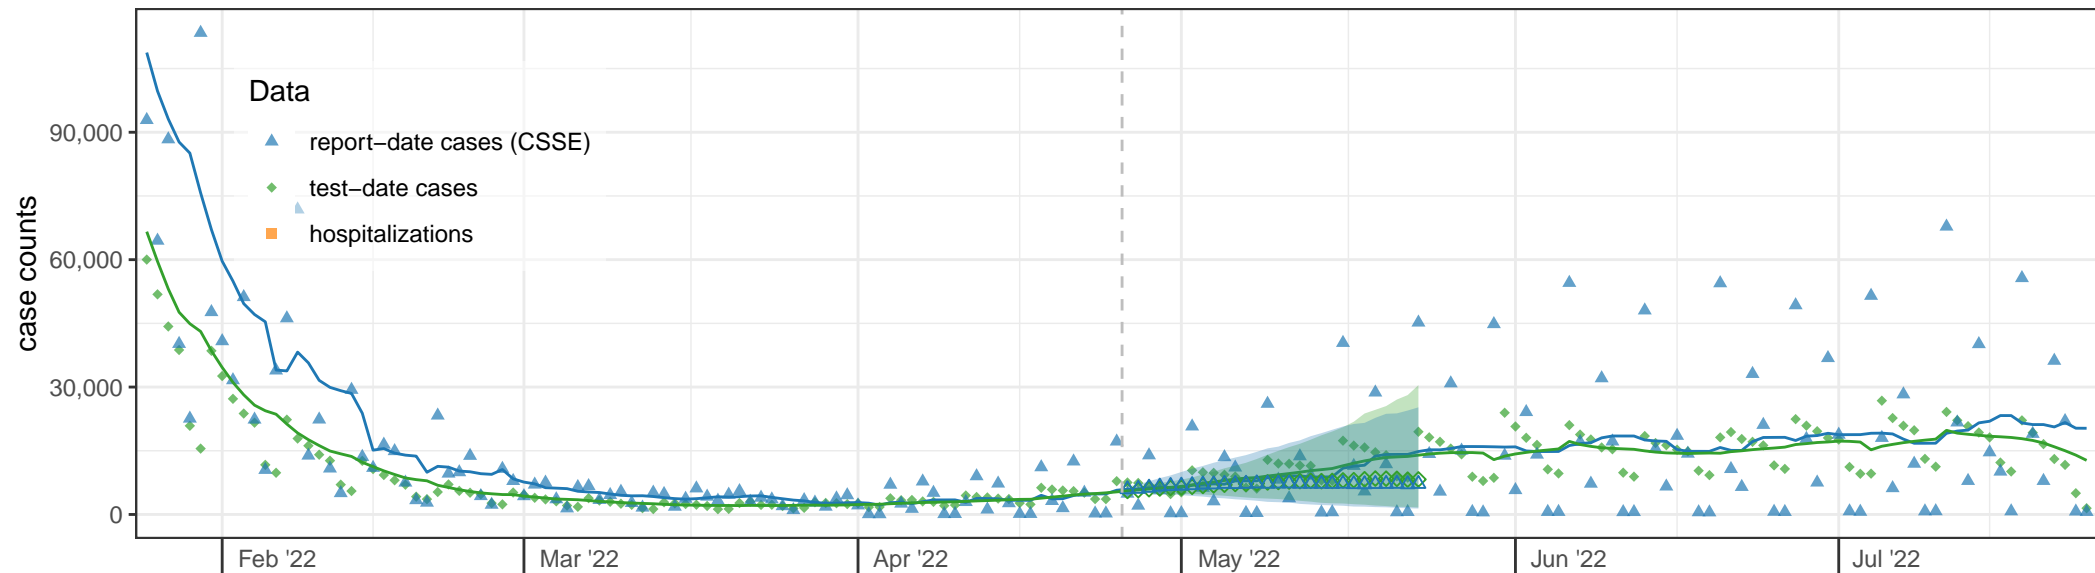

California hospitalization data and forecasts: 2022-04-25

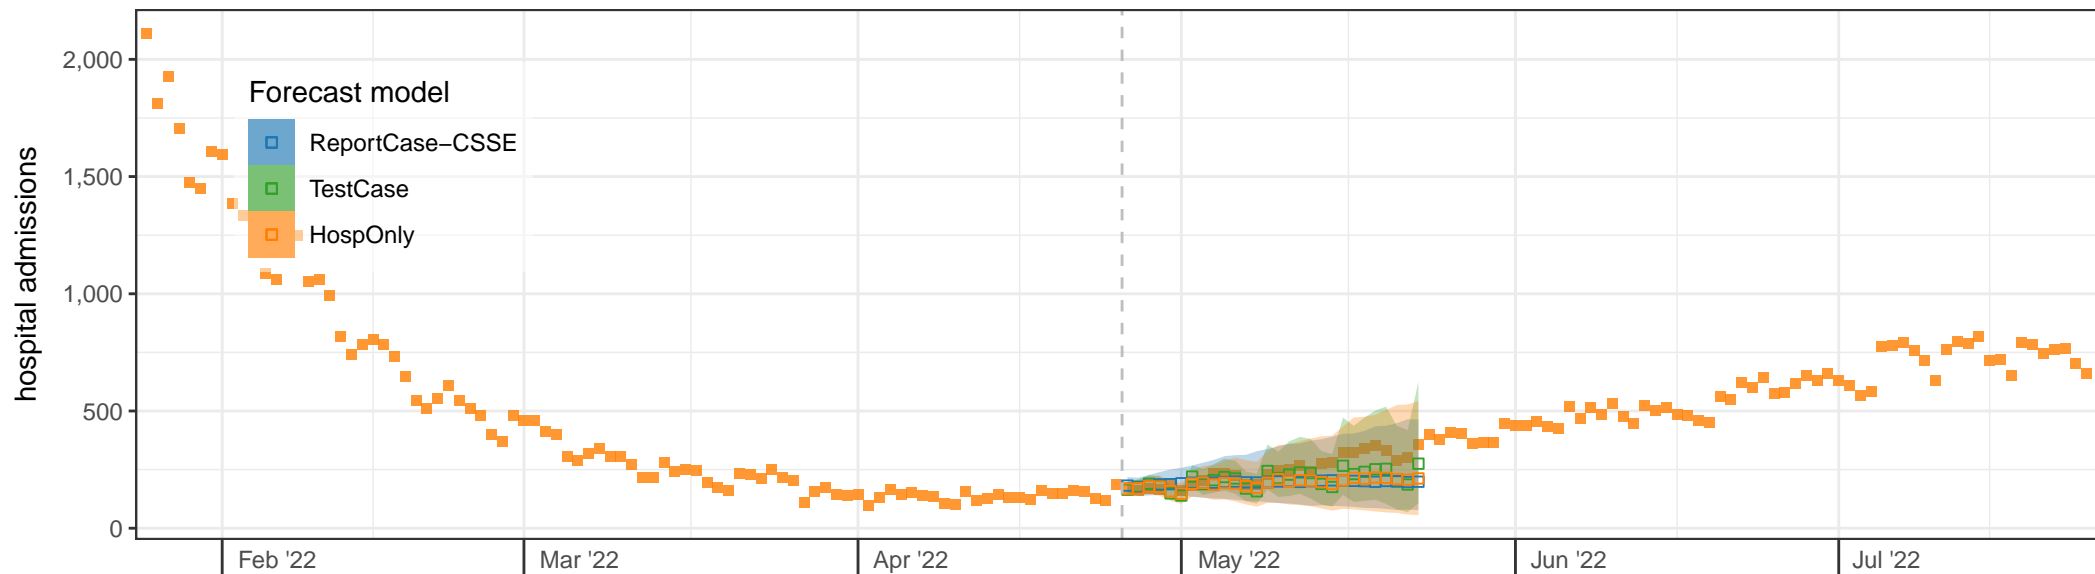

California case data and forecasts: 2022-05-02

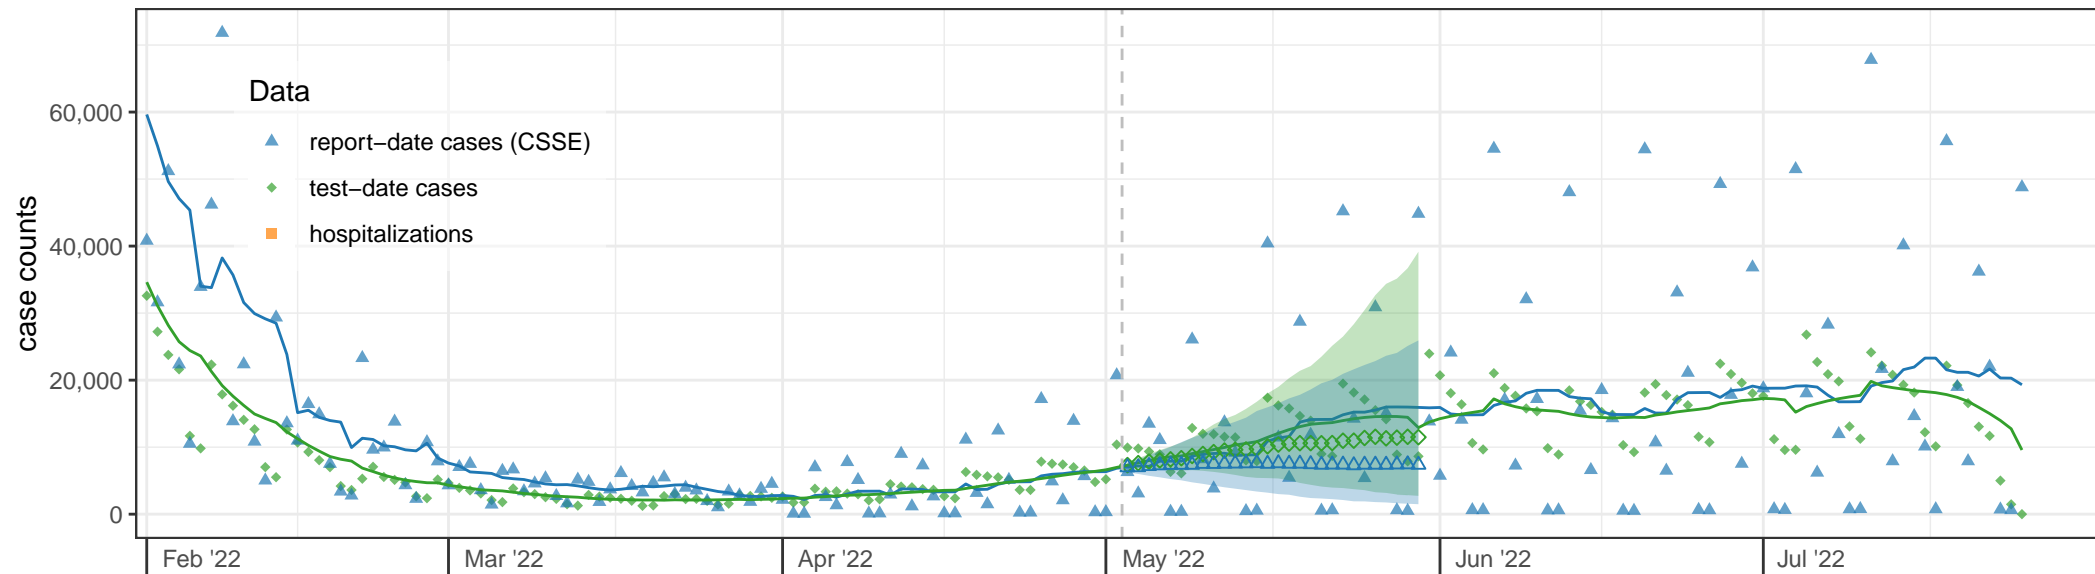

California hospitalization data and forecasts: 2022-05-02

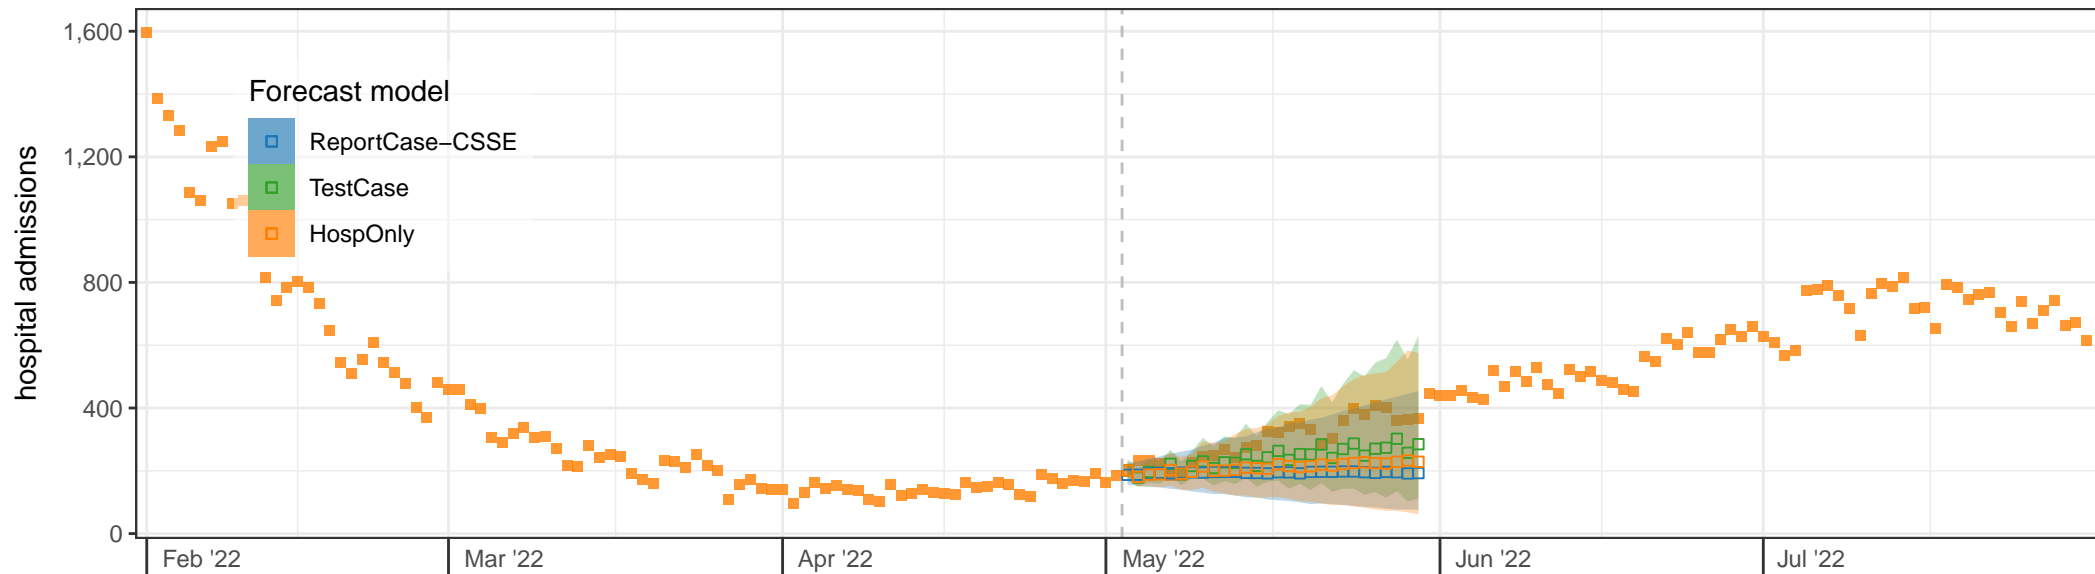

California case data and forecasts: 2022-05-09

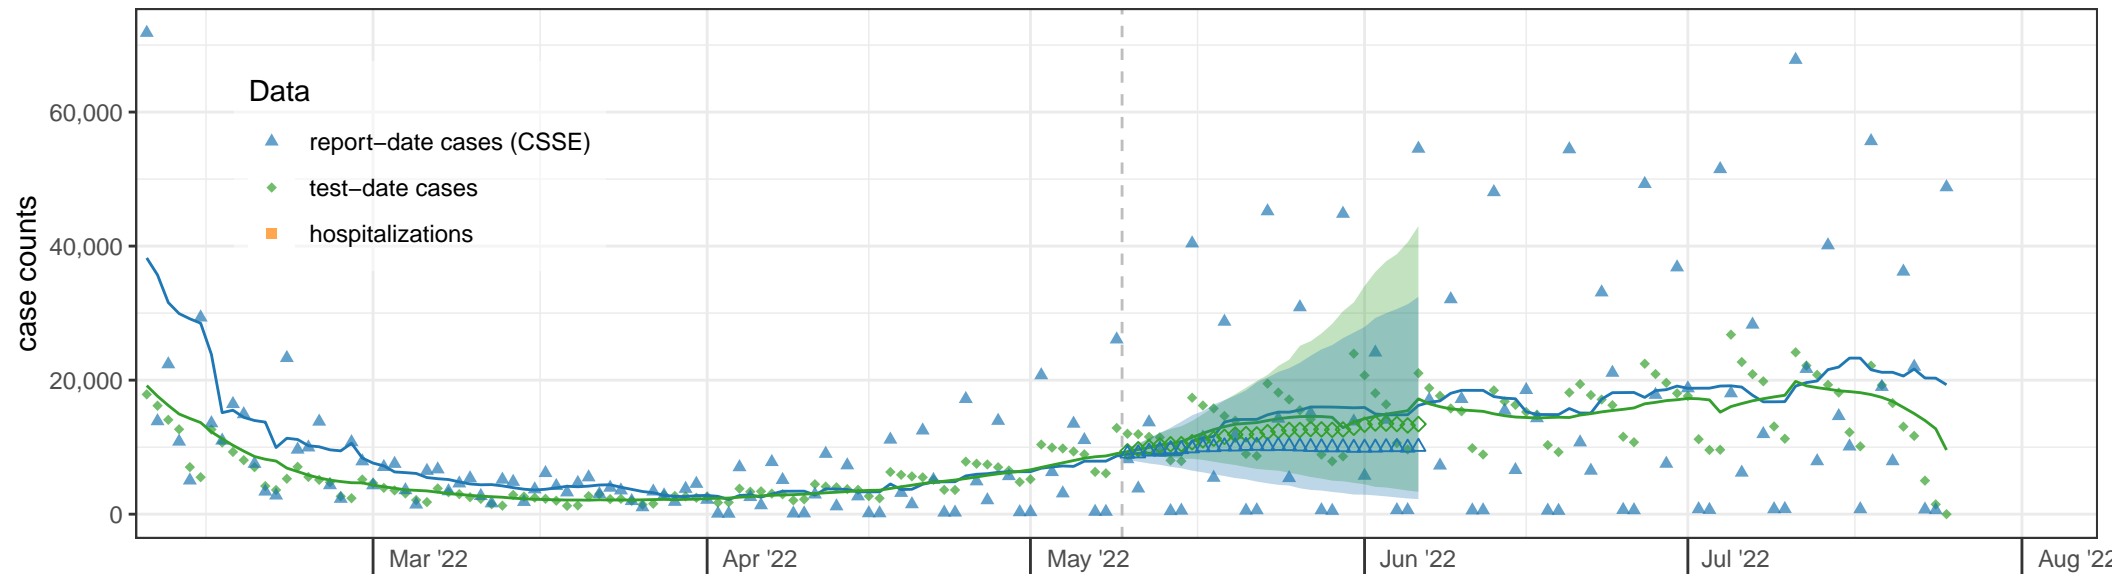

California hospitalization data and forecasts: 2022-05-09

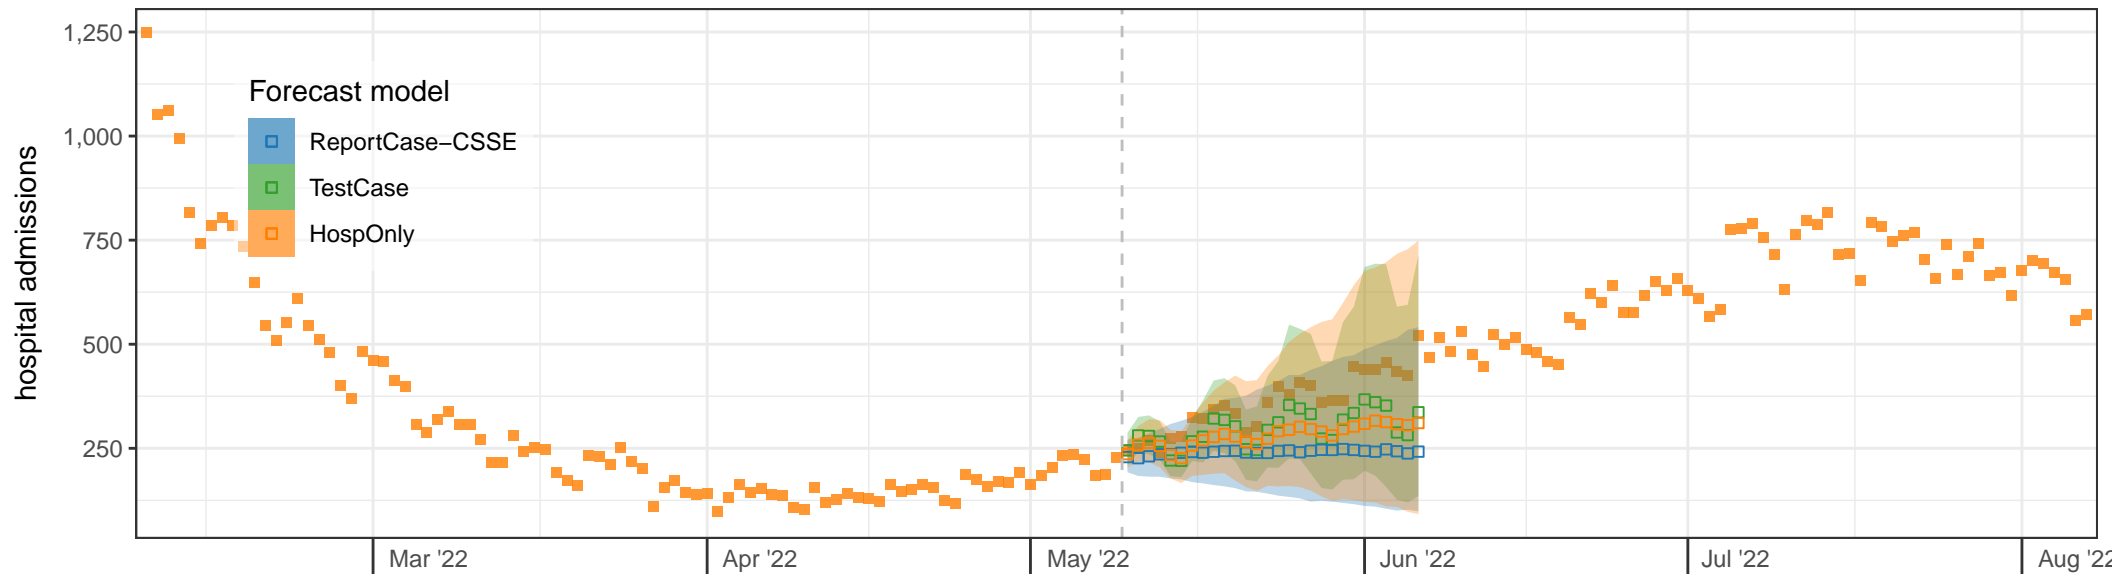

California case data and forecasts: 2022-05-16

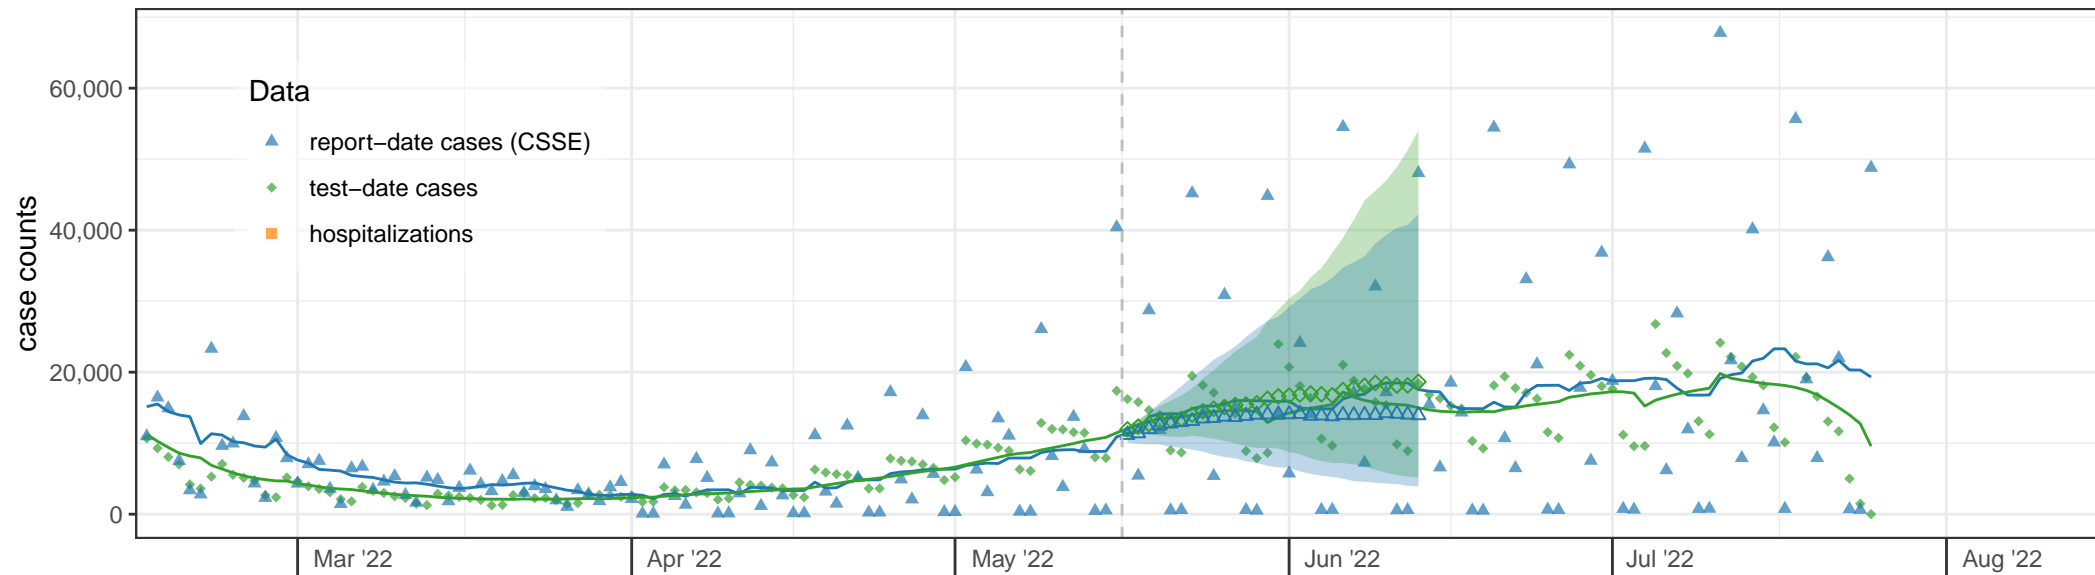

California hospitalization data and forecasts: 2022-05-16

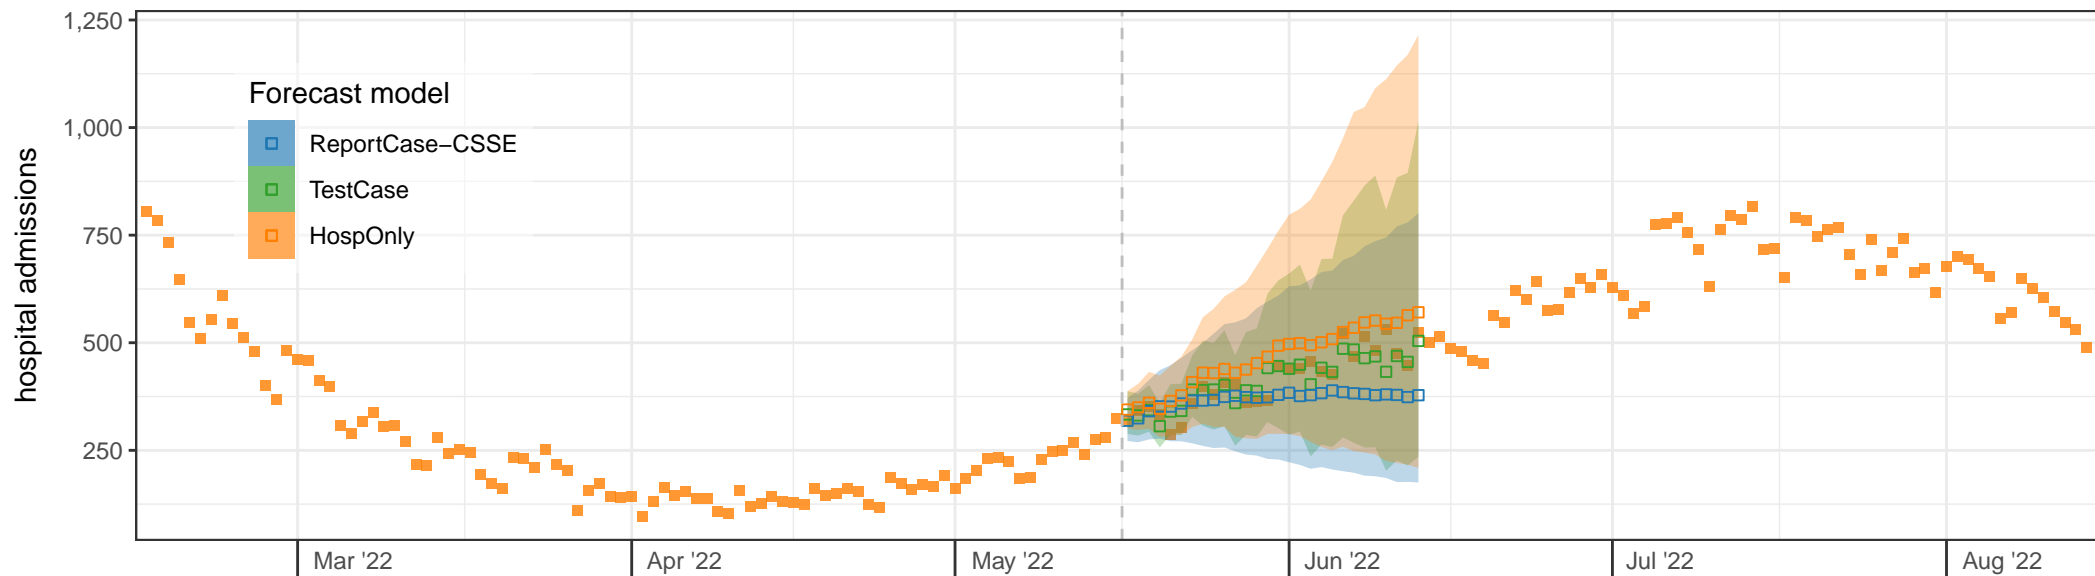

California case data and forecasts: 2022-05-23

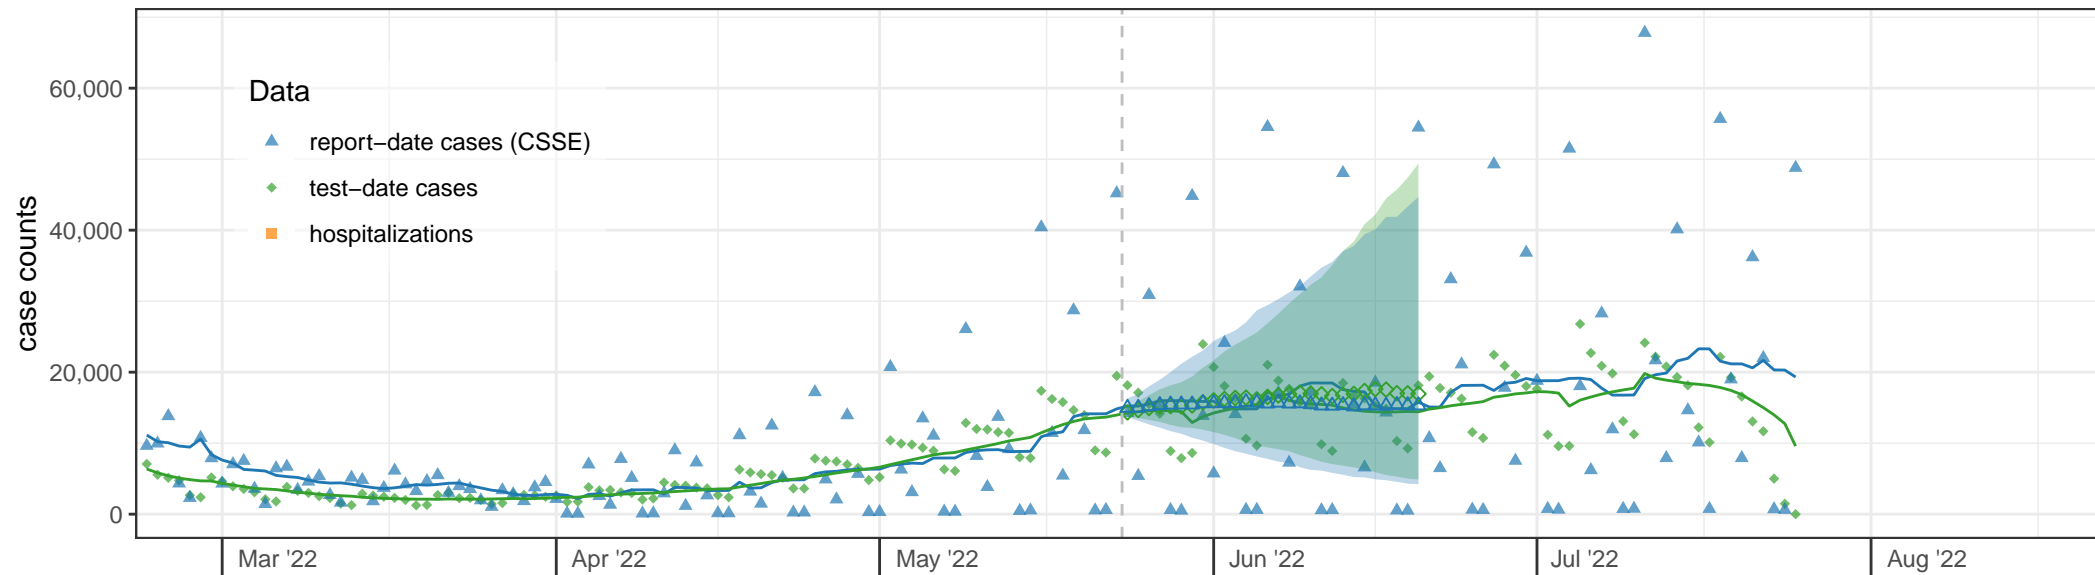

California hospitalization data and forecasts: 2022-05-23

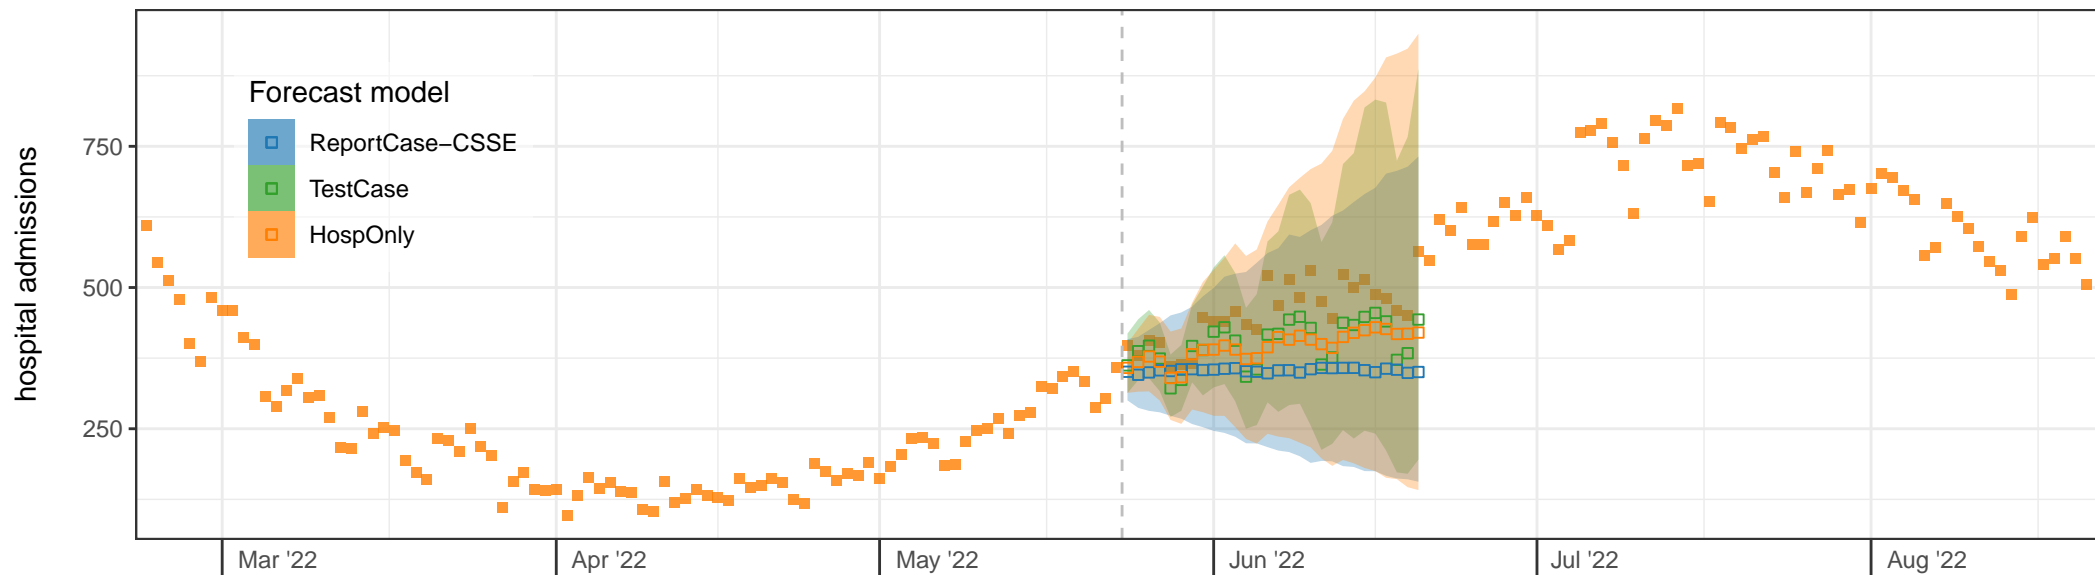

California case data and forecasts: 2022-05-30

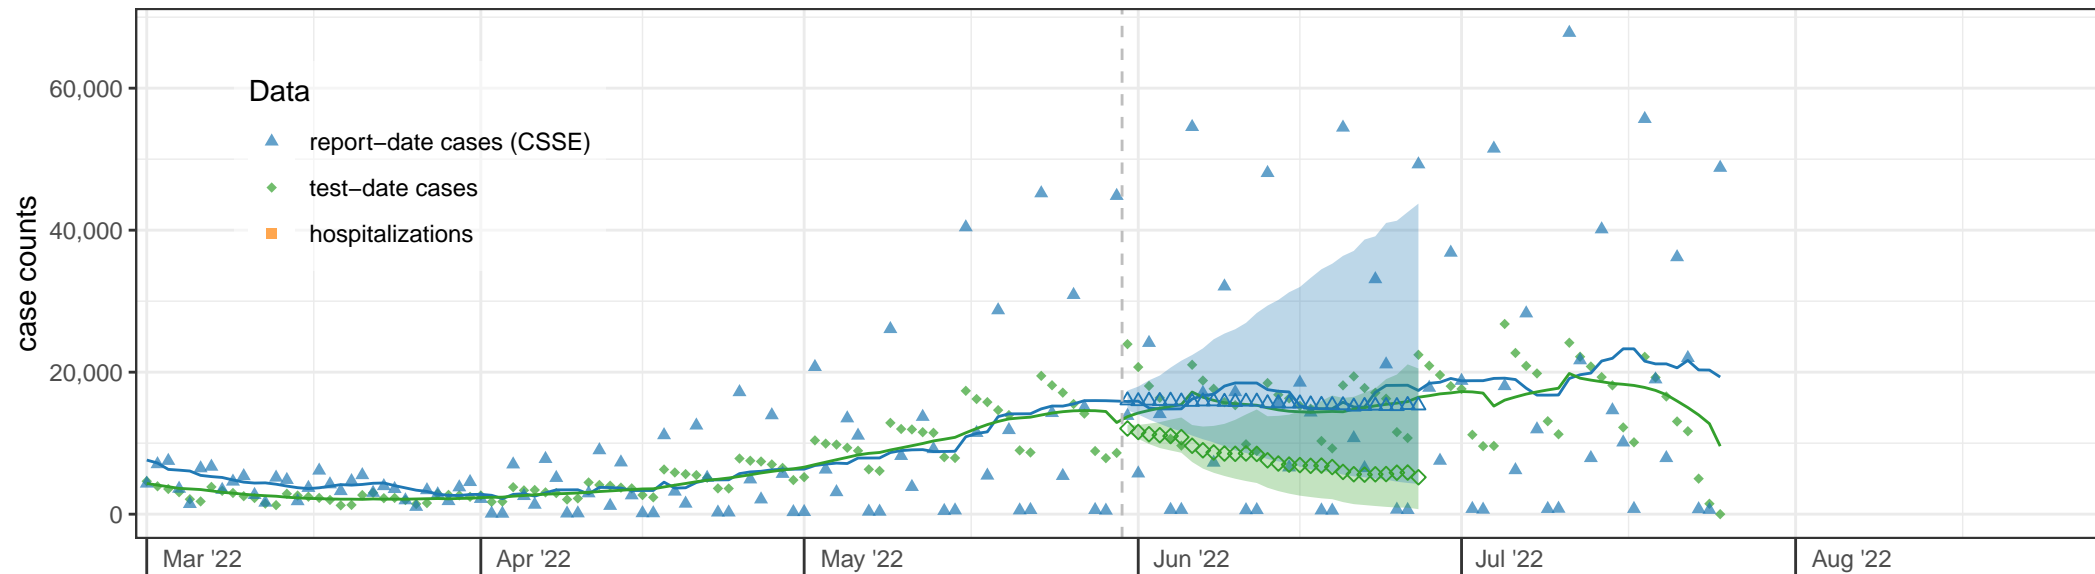

California hospitalization data and forecasts: 2022-05-30

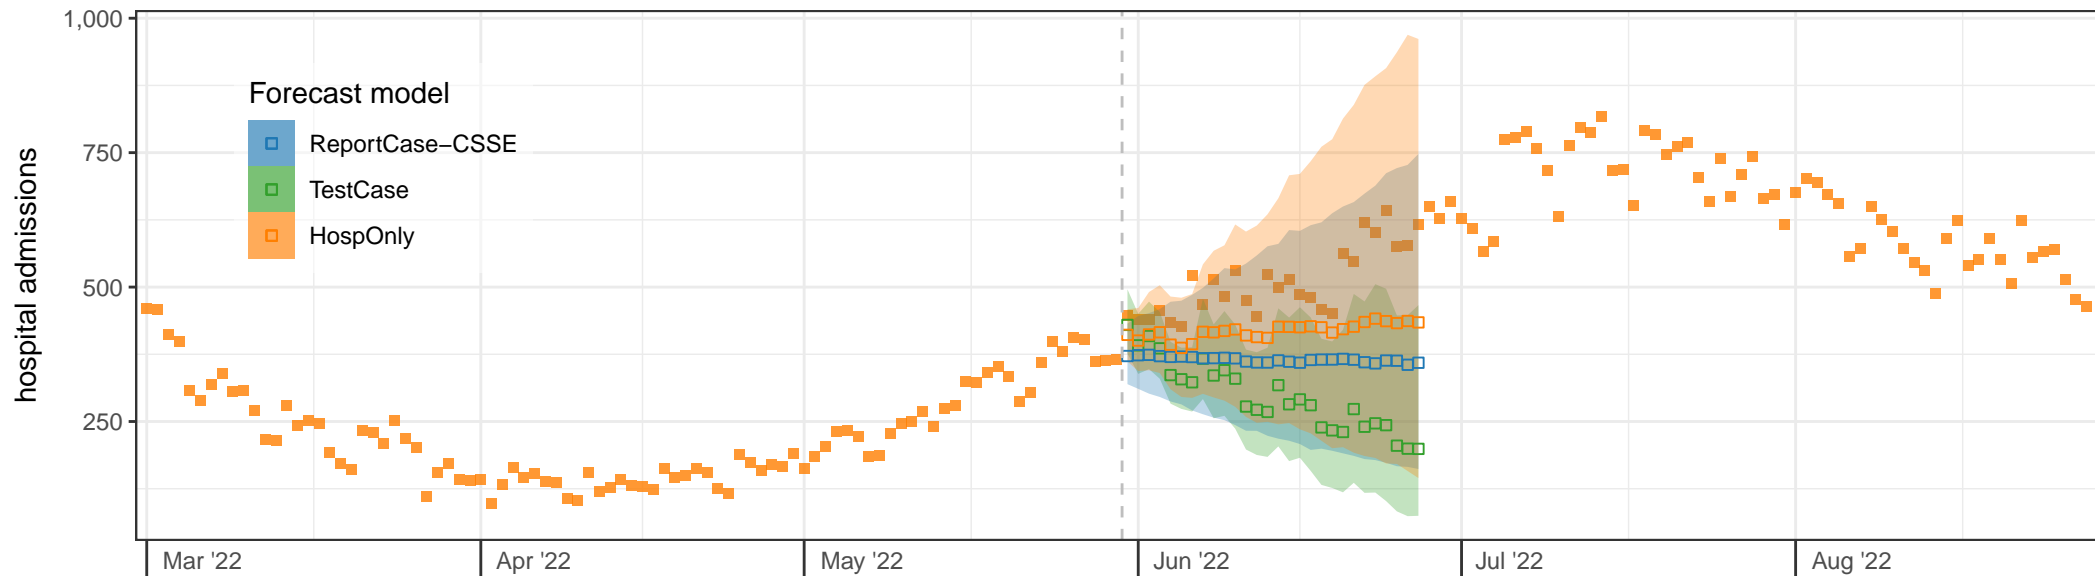

Massachusetts case data and forecasts: 2020-12-07

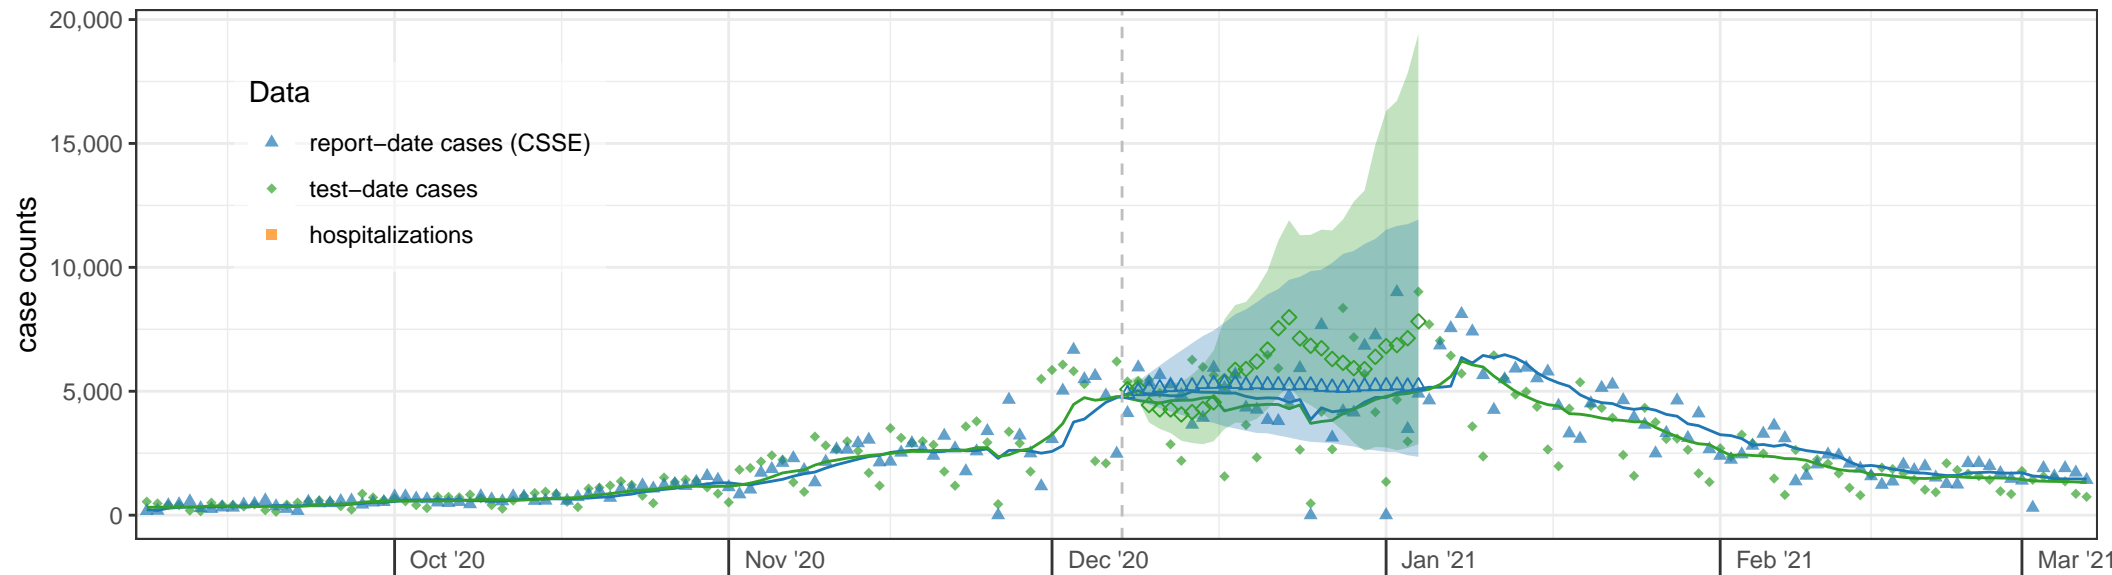

Massachusetts hospitalization data and forecasts: 2020-12-07

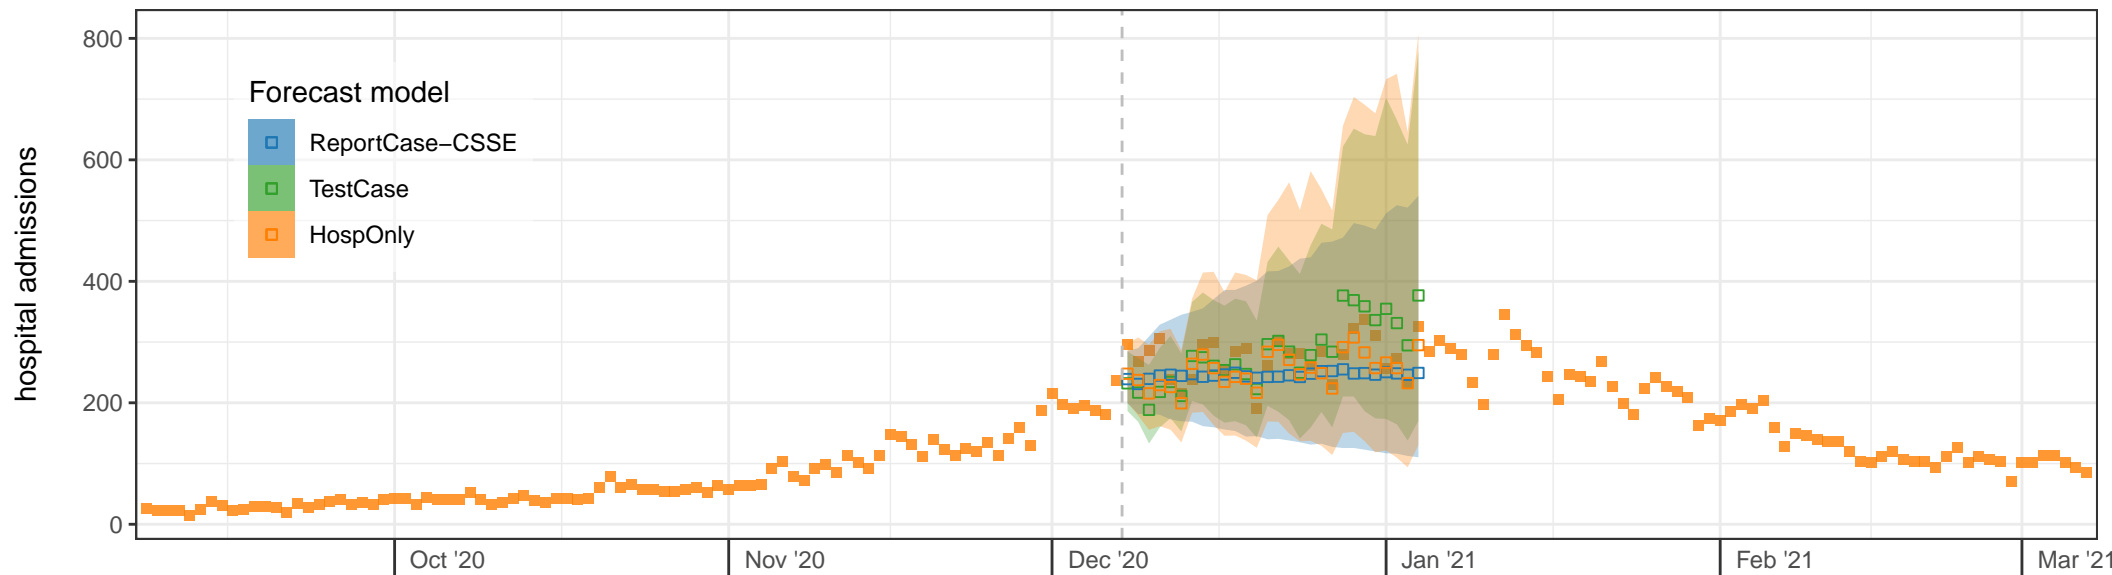

Massachusetts case data and forecasts: 2020-12-14

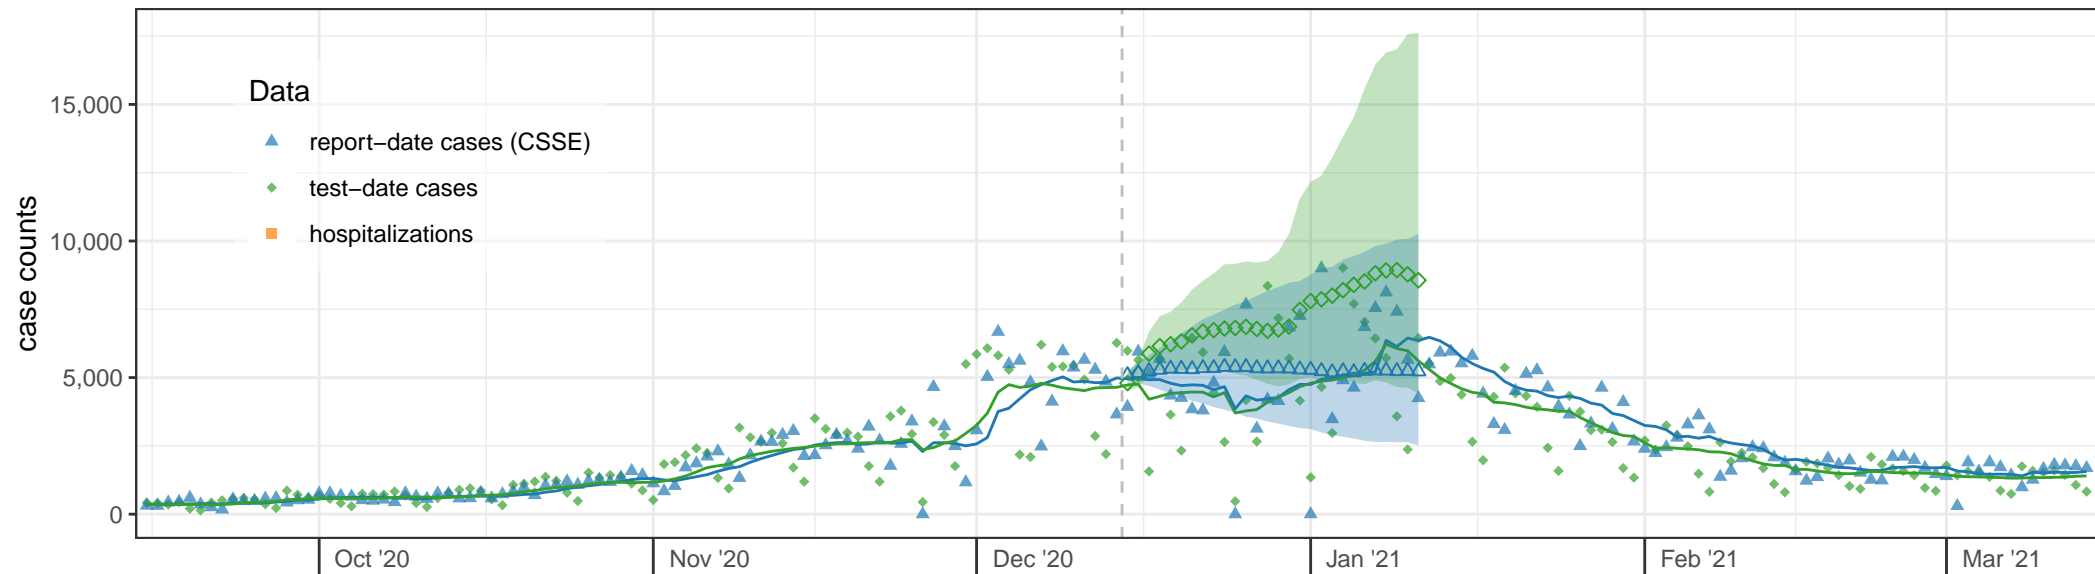

Massachusetts hospitalization data and forecasts: 2020-12-14

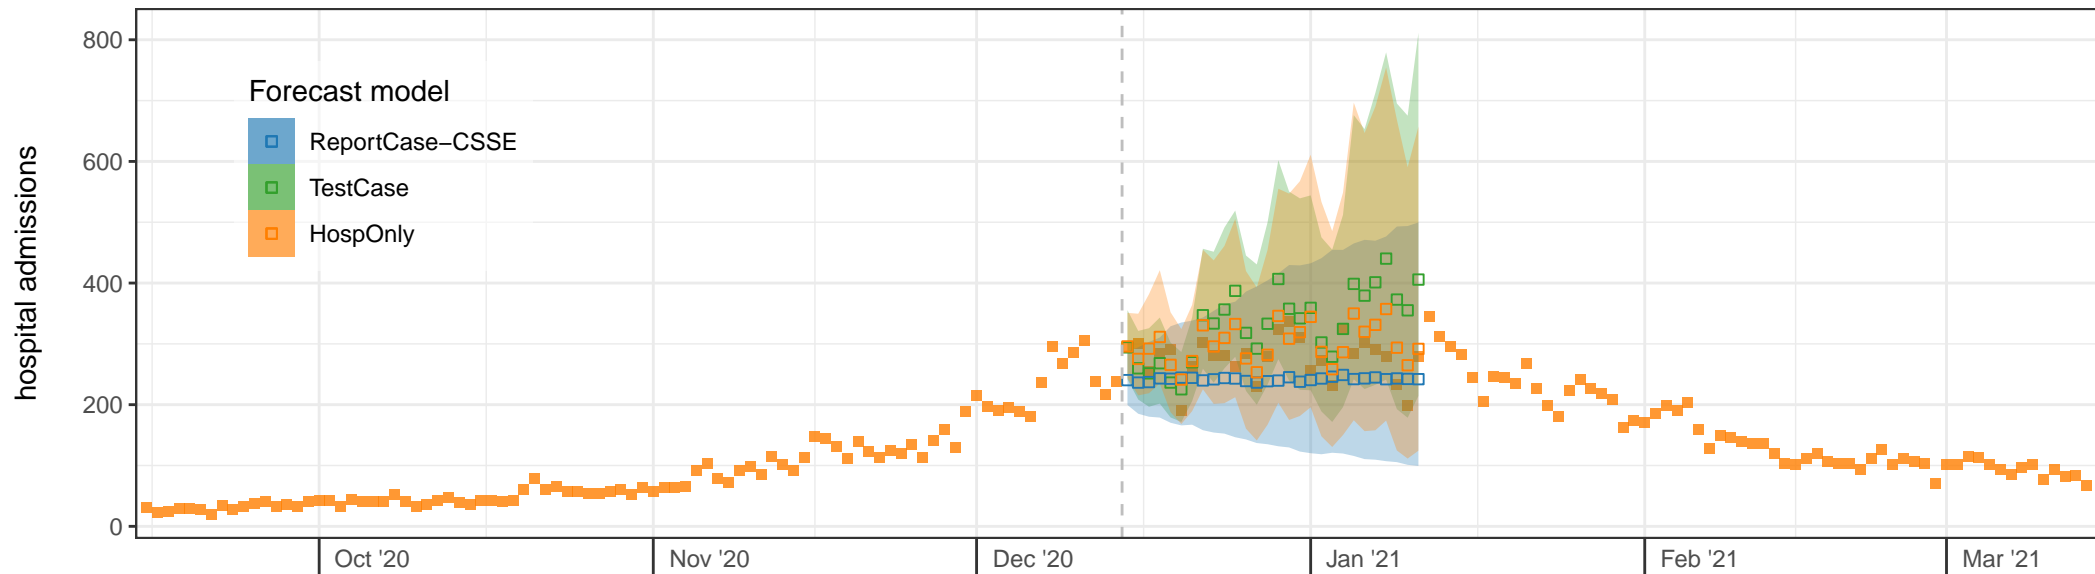



Massachusetts case data and forecasts: 2020–12–21

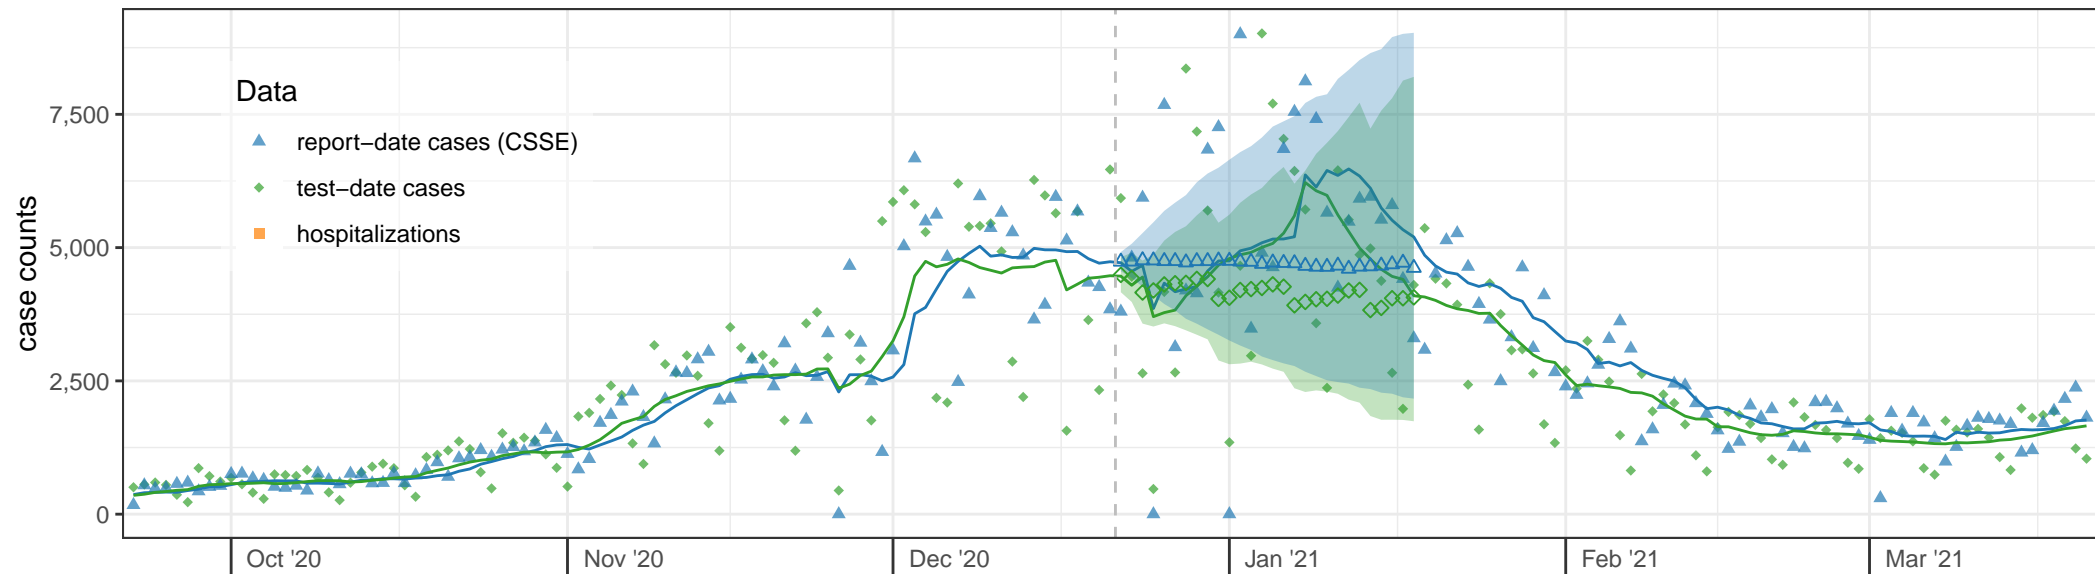

Massachusetts hospitalization data and forecasts: 2020–12–21

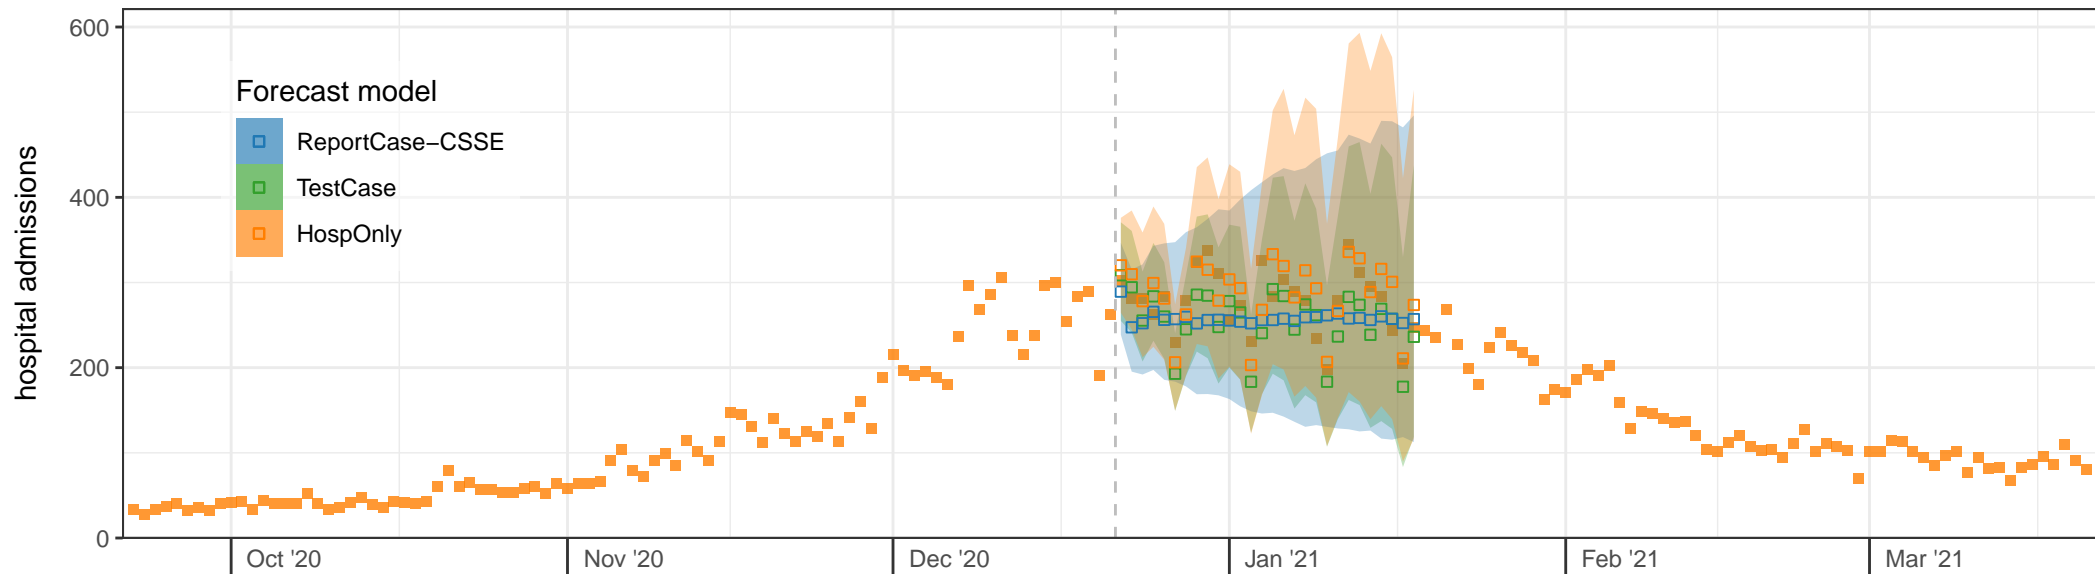

Massachusetts case data and forecasts: 2020–12–28

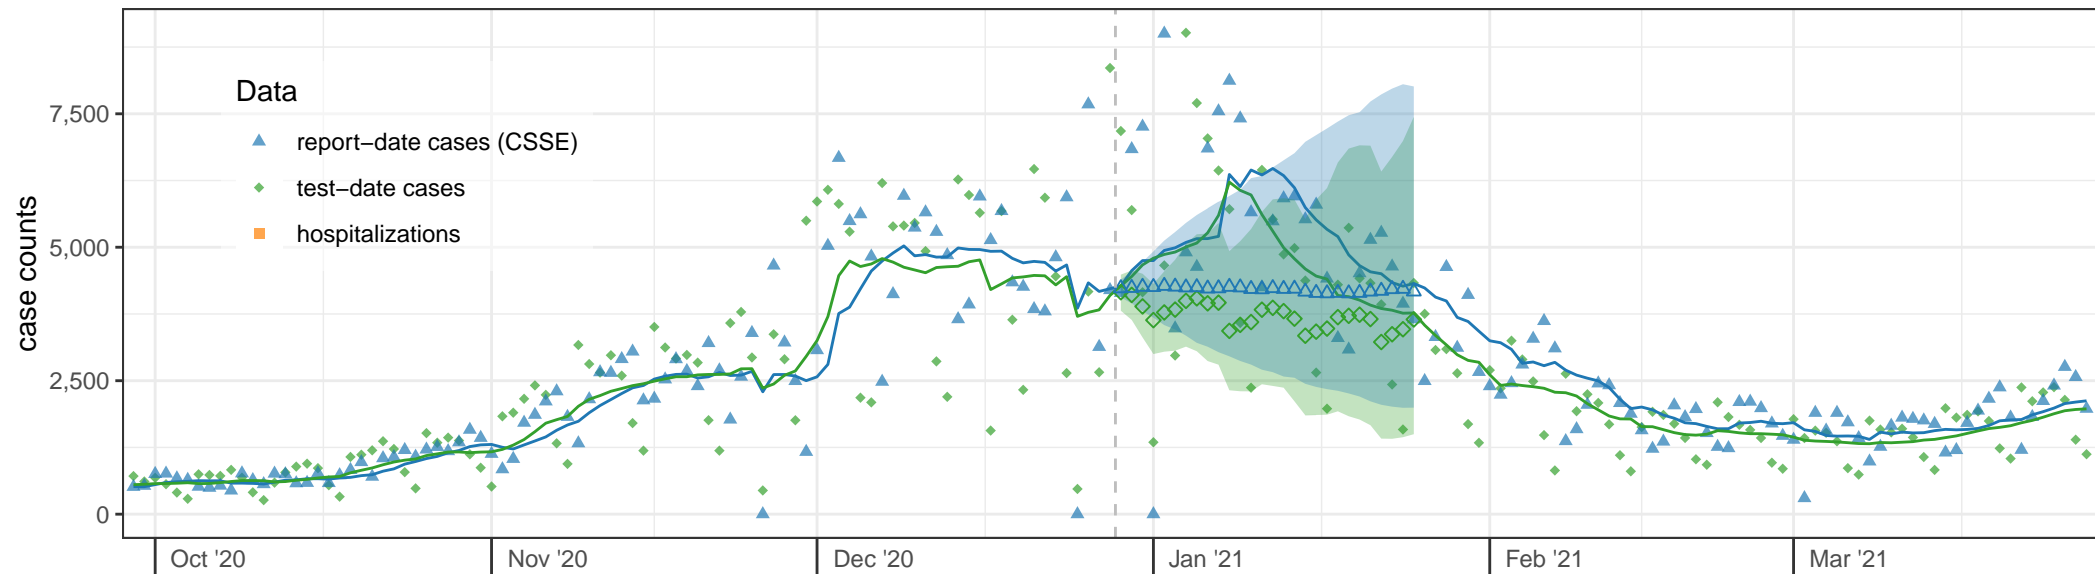

Massachusetts hospitalization data and forecasts: 2020–12–28

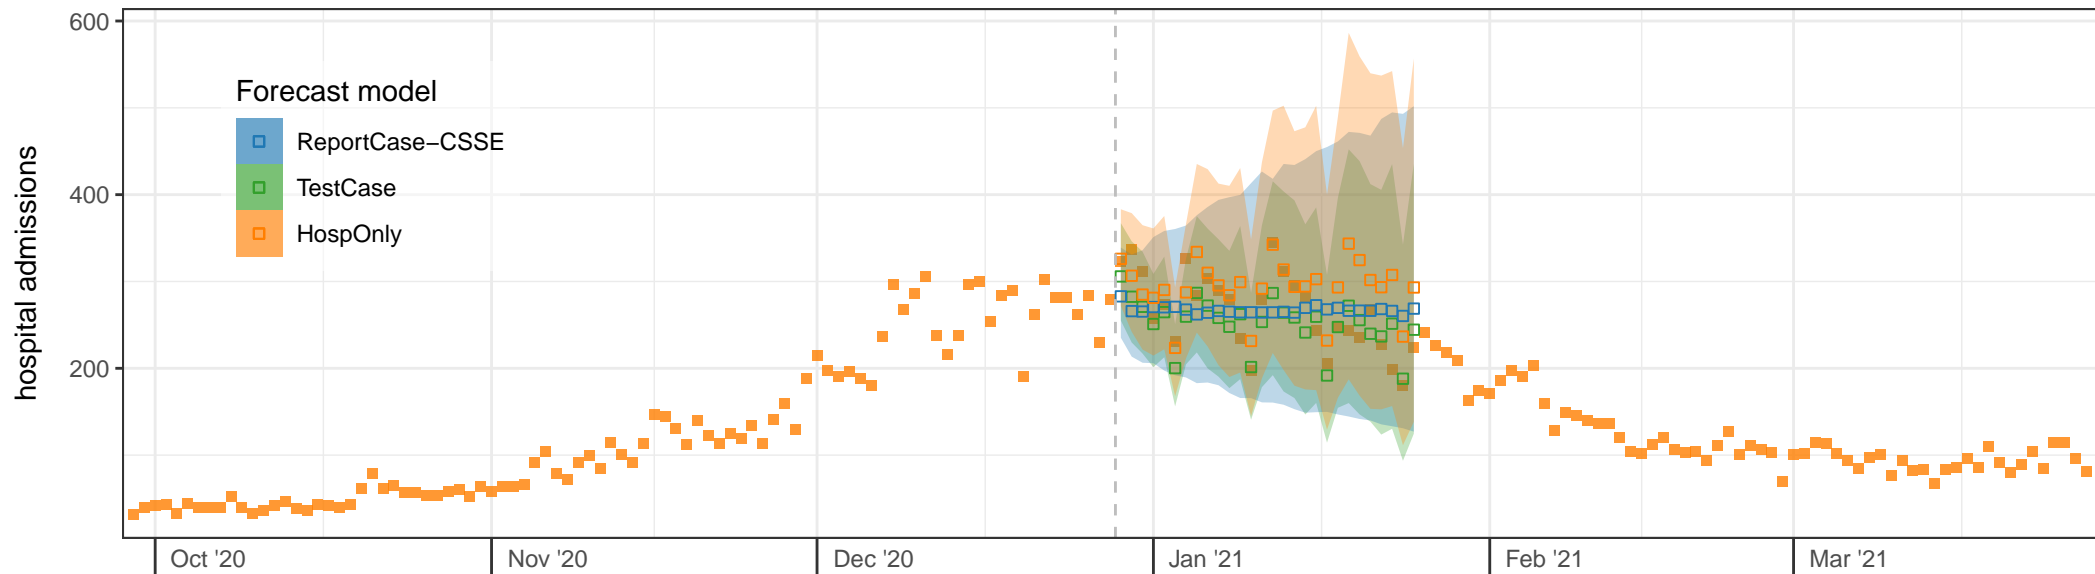

Massachusetts case data and forecasts: 2021-01-04

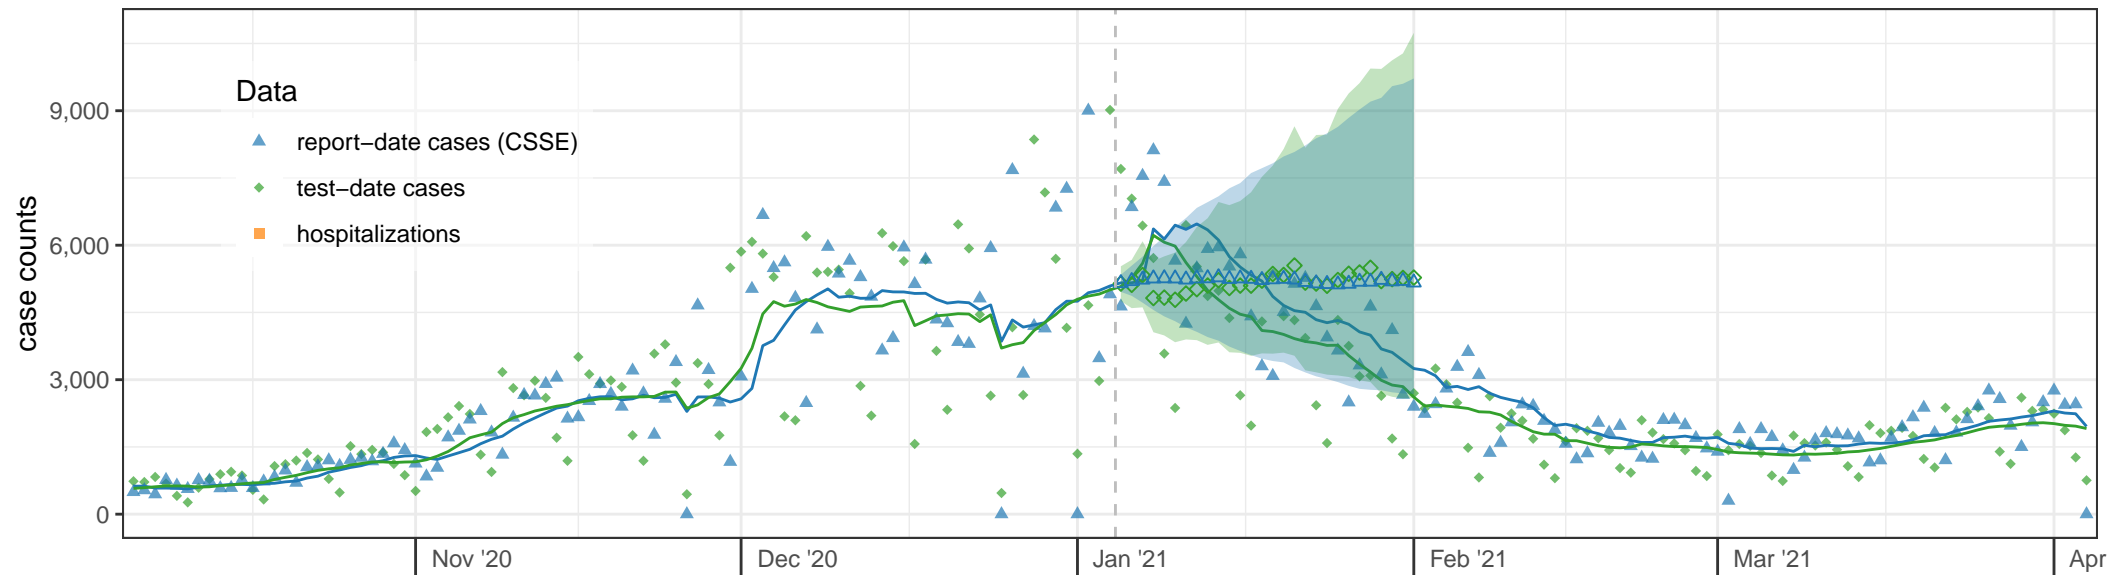

Massachusetts hospitalization data and forecasts: 2021-01-04

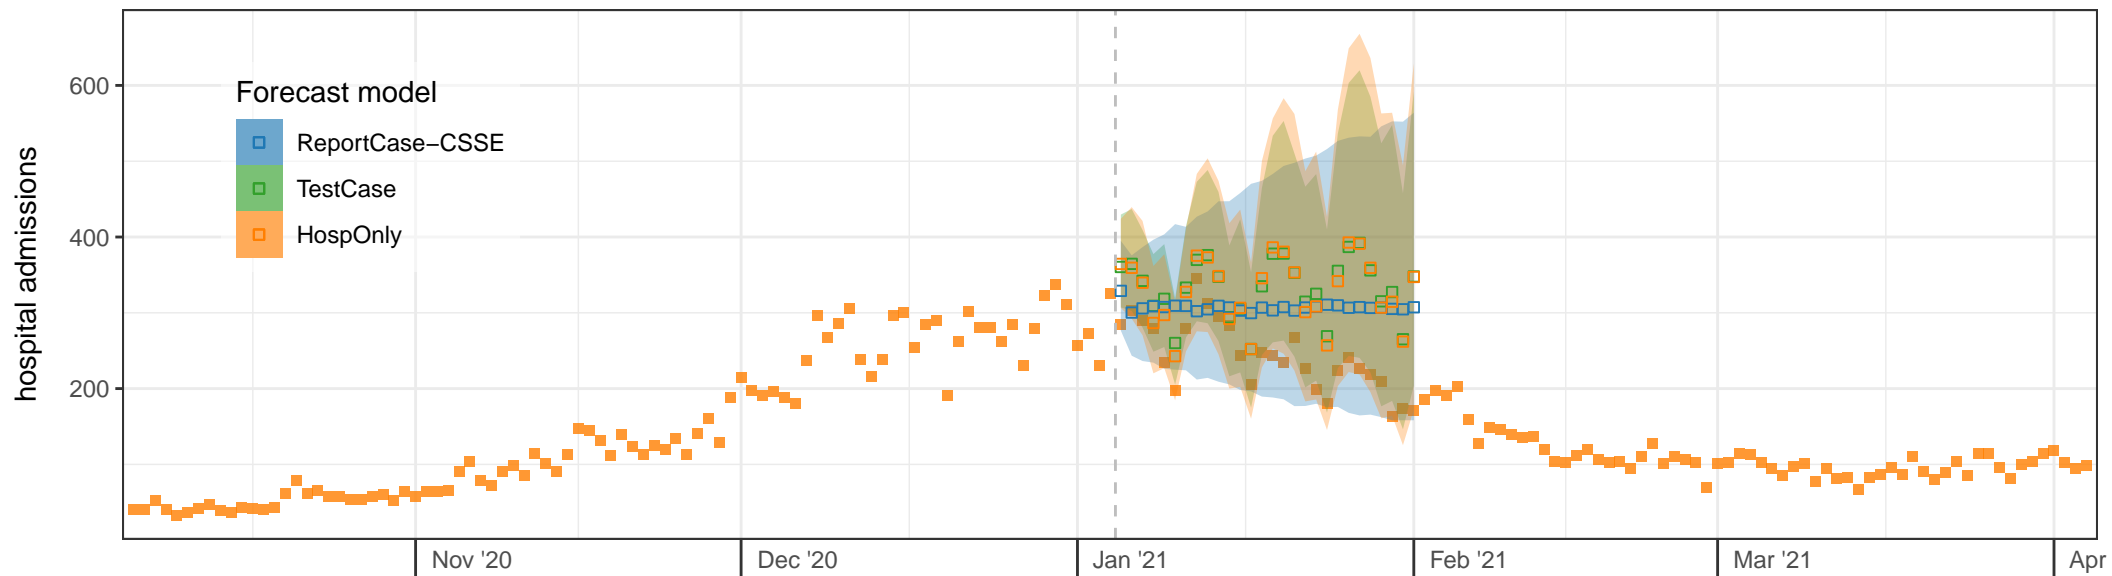

Massachusetts case data and forecasts: 2021-01-11

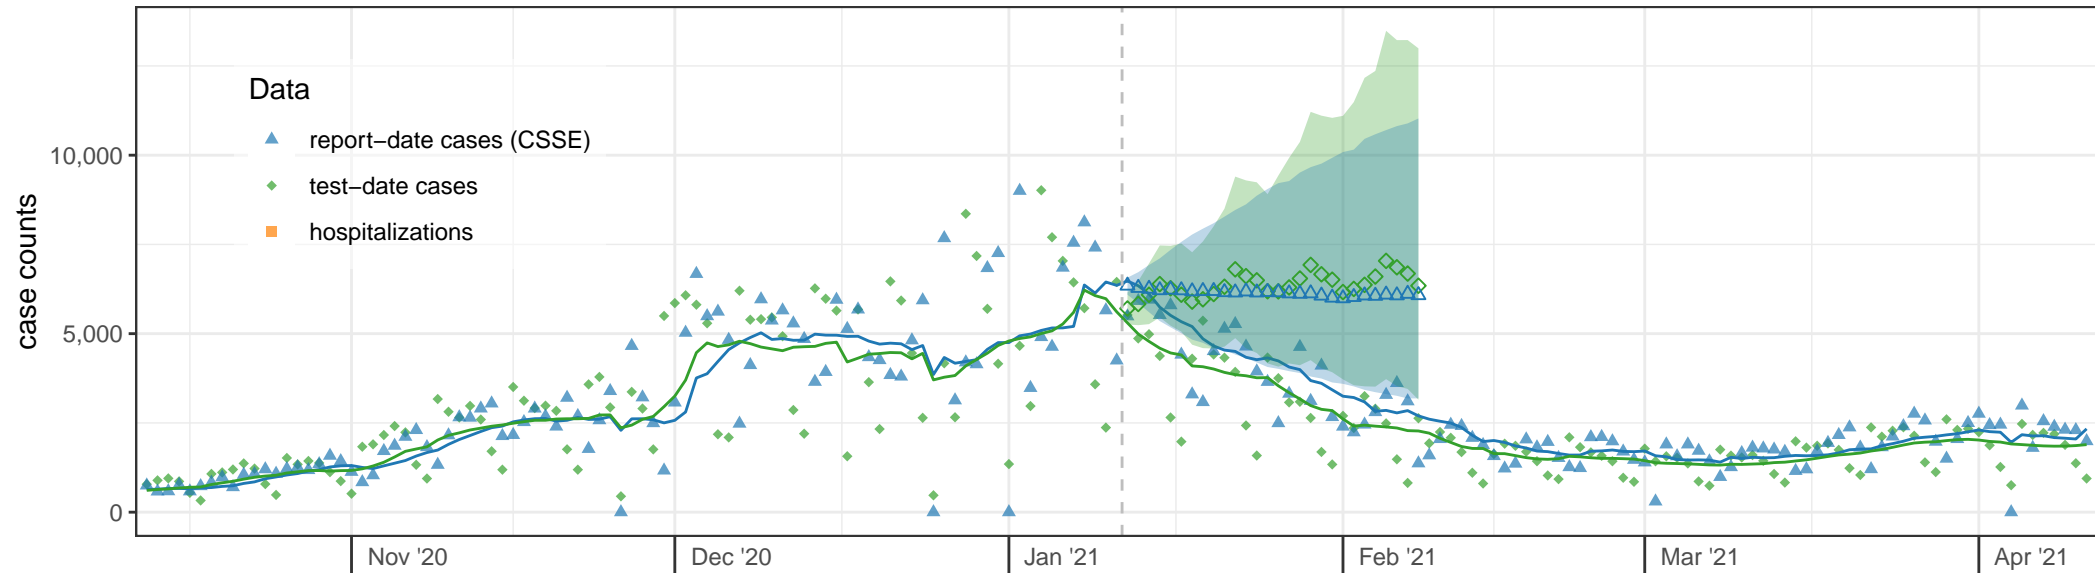

Massachusetts hospitalization data and forecasts: 2021-01-11

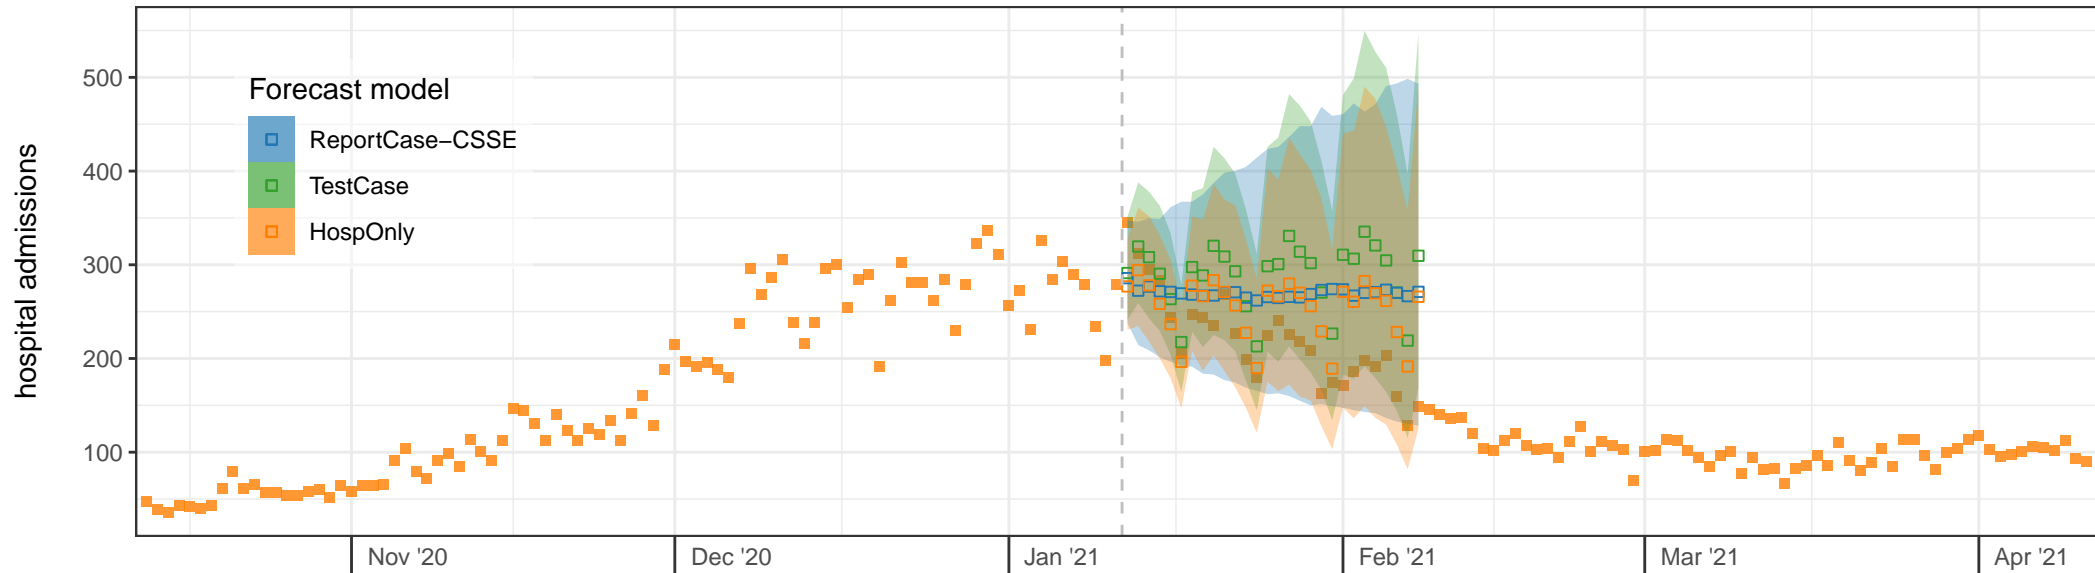

Massachusetts case data and forecasts: 2021-01-18

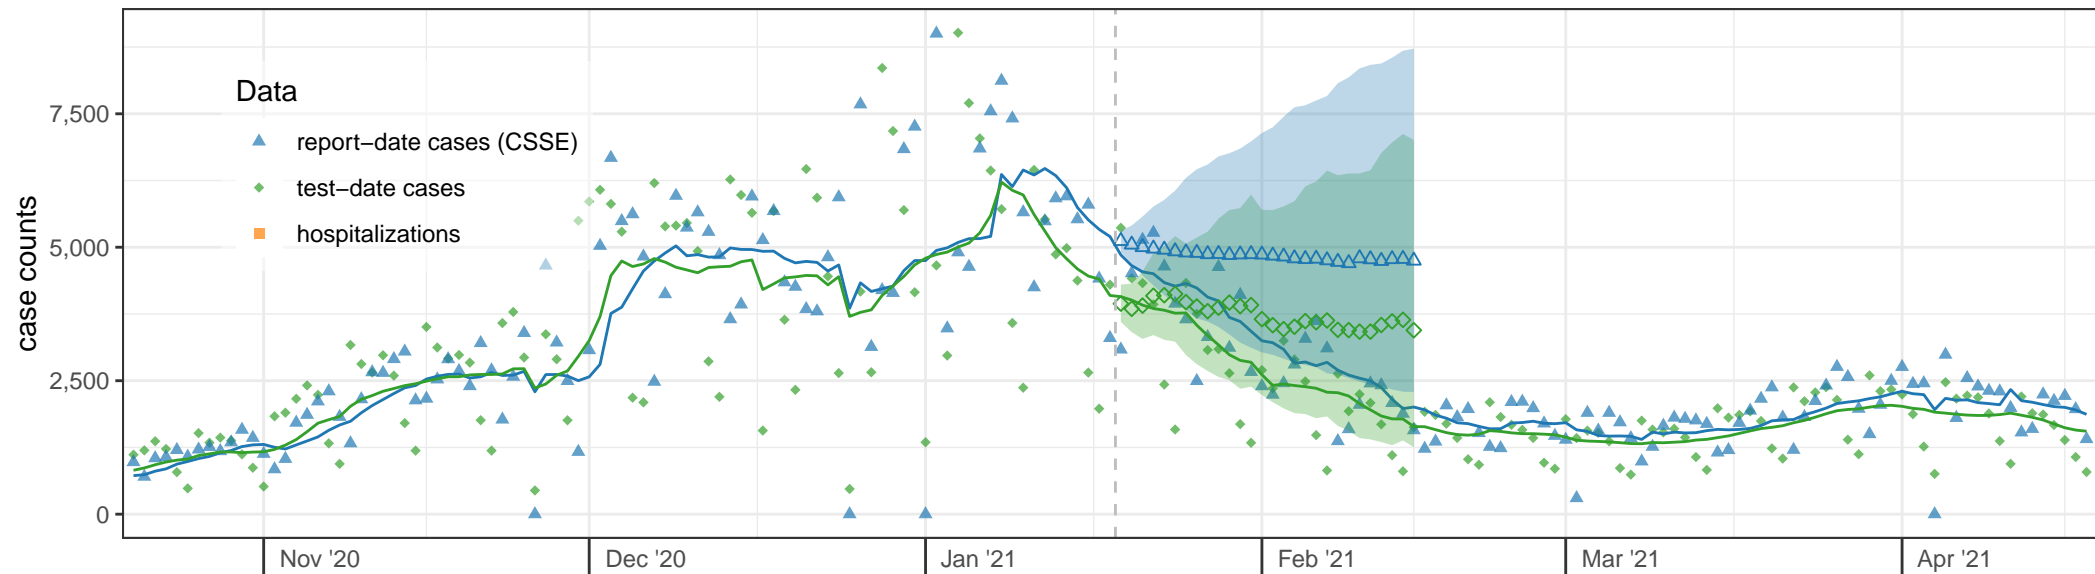

Massachusetts hospitalization data and forecasts: 2021-01-18

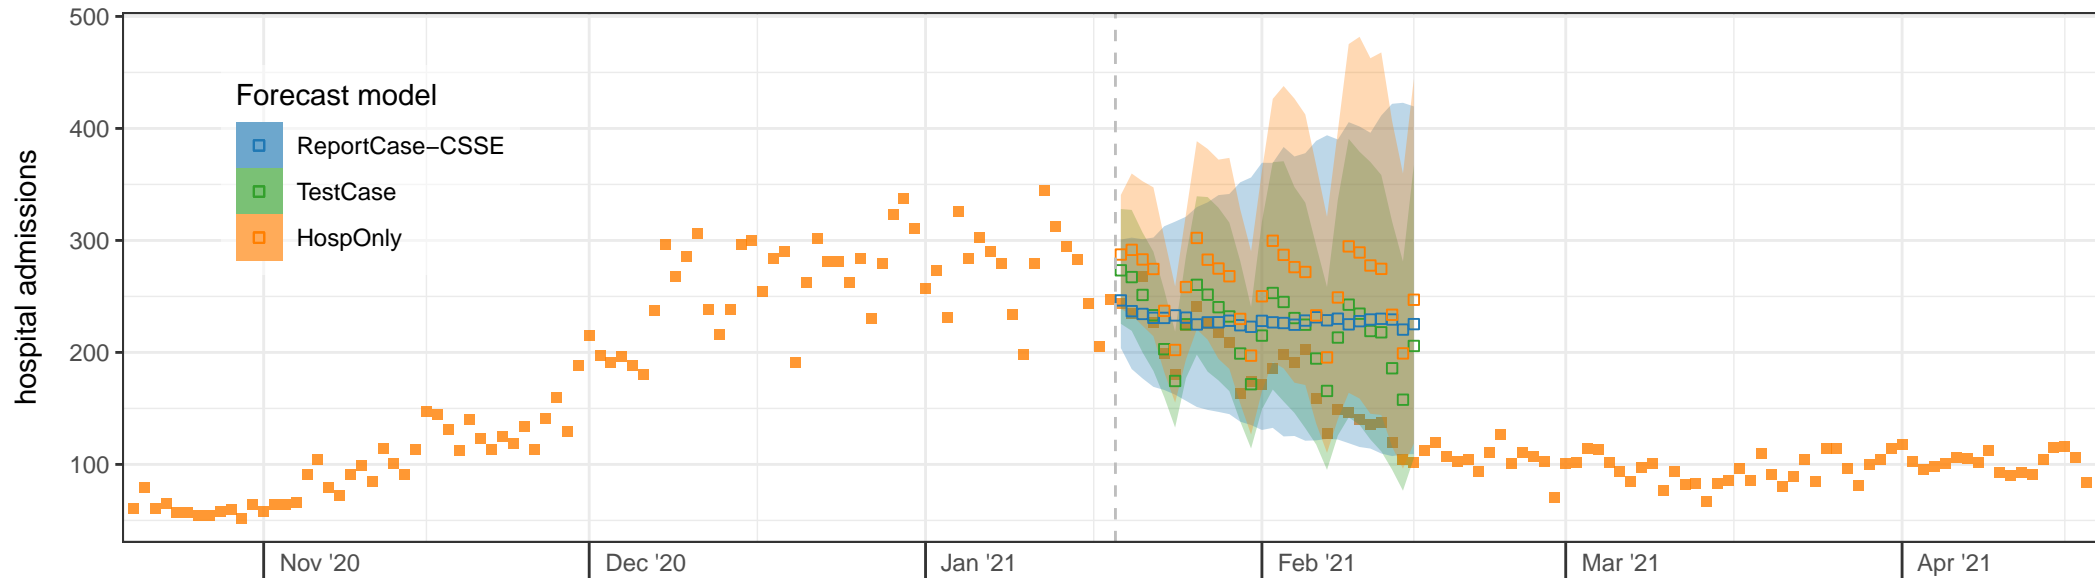

Massachusetts case data and forecasts: 2021-01-25

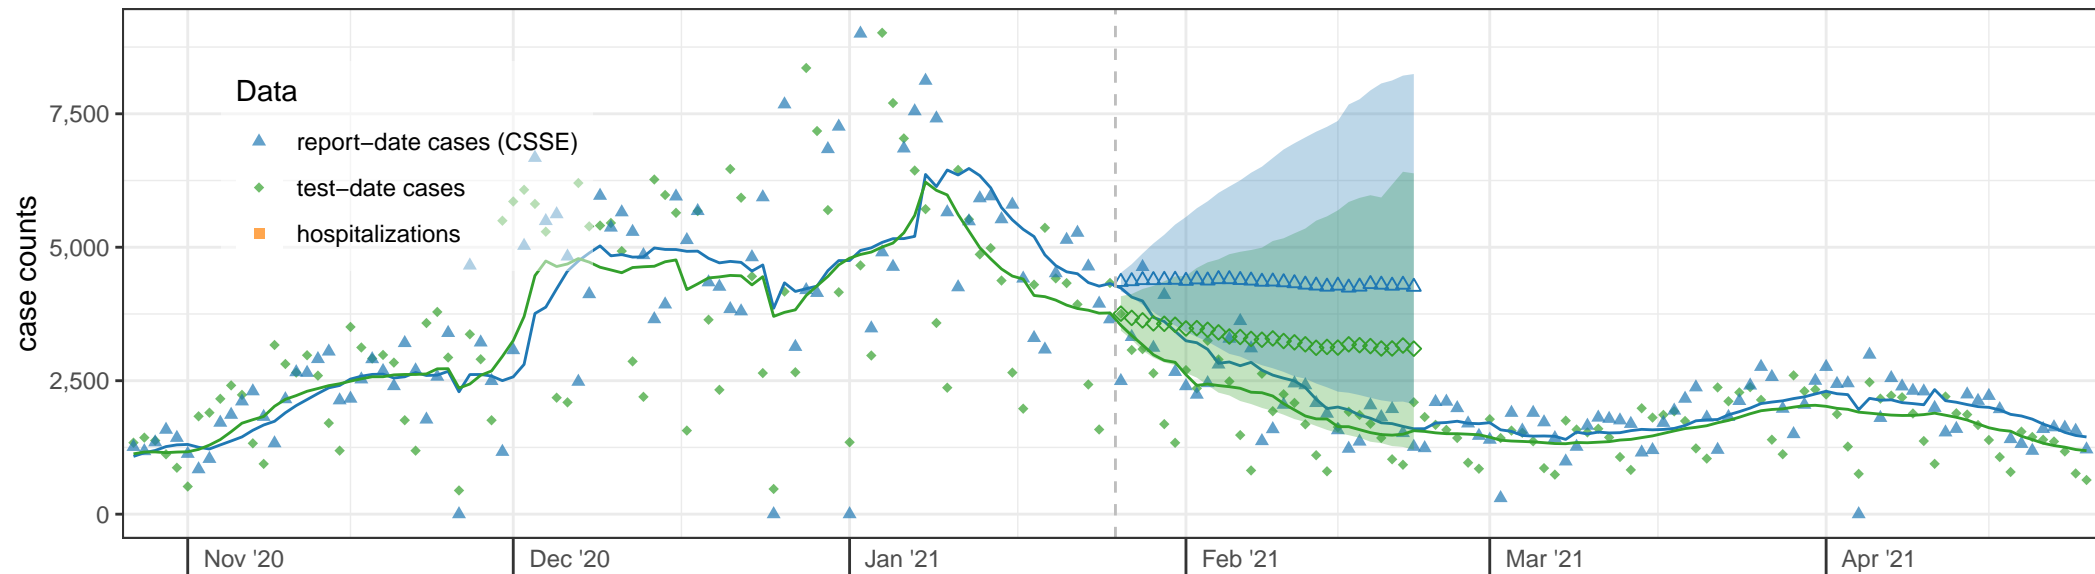

Massachusetts hospitalization data and forecasts: 2021-01-25

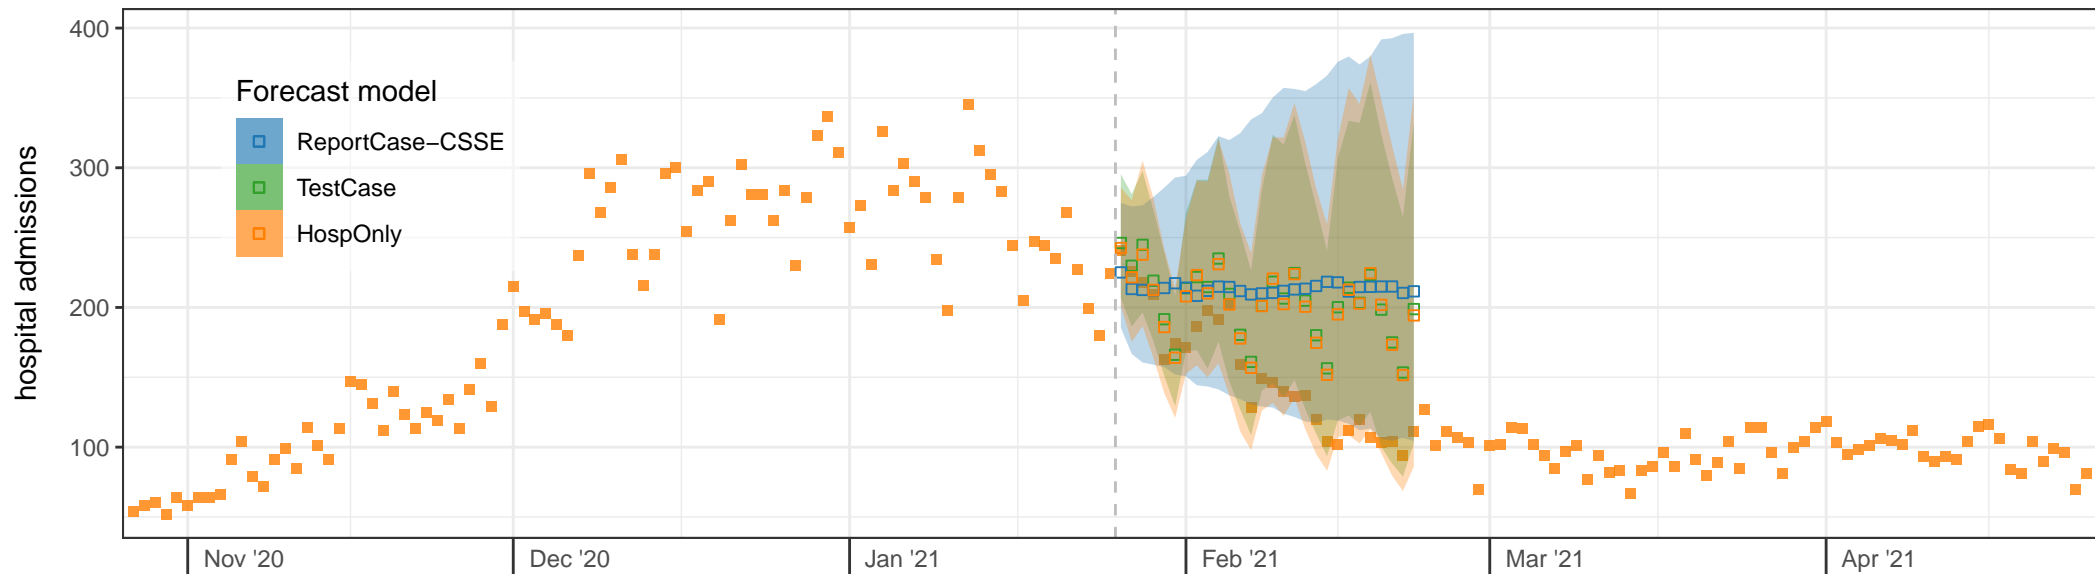

Massachusetts case data and forecasts: 2021-02-01

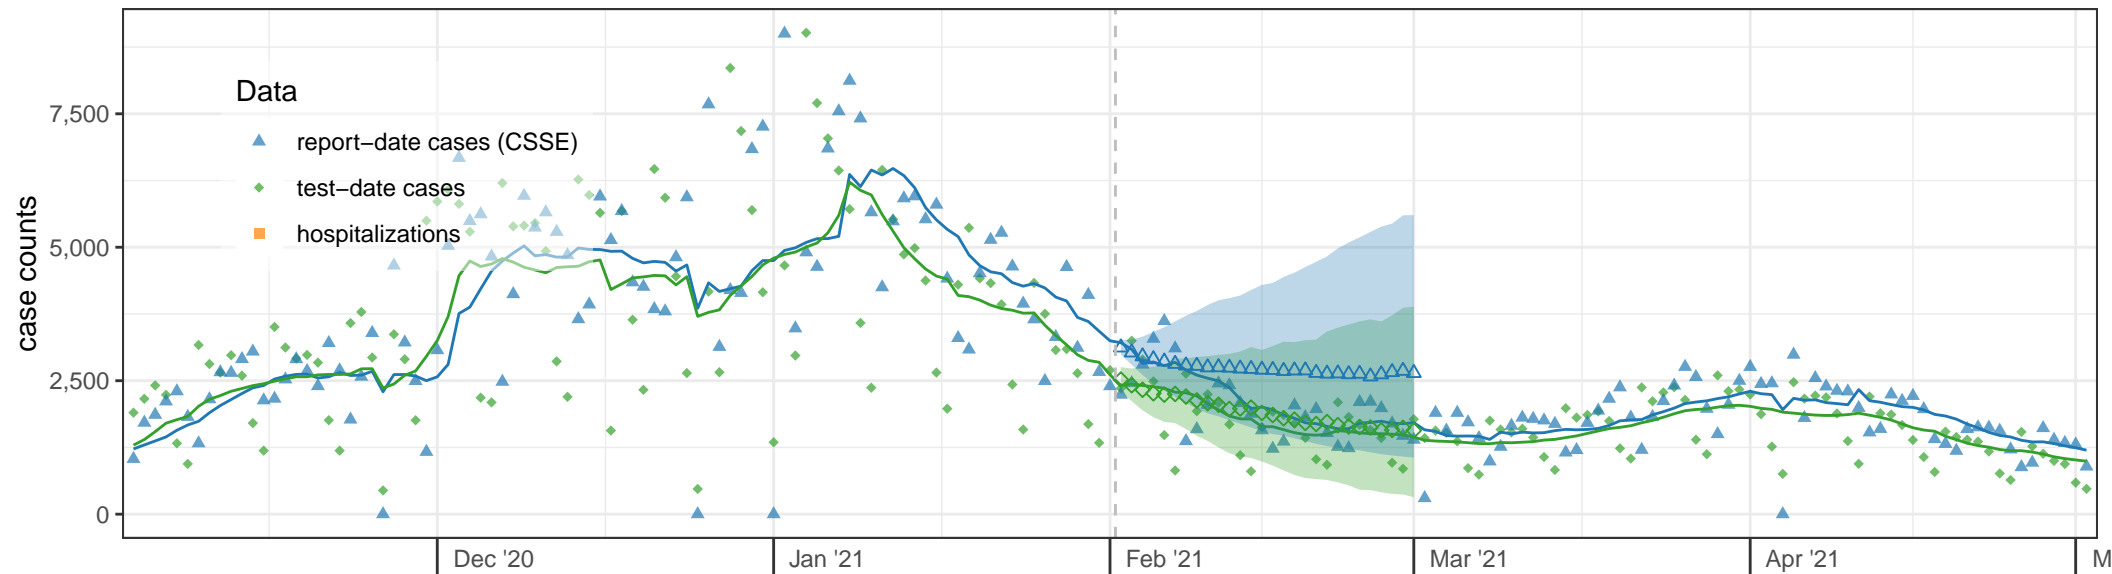

Massachusetts hospitalization data and forecasts: 2021-02-01

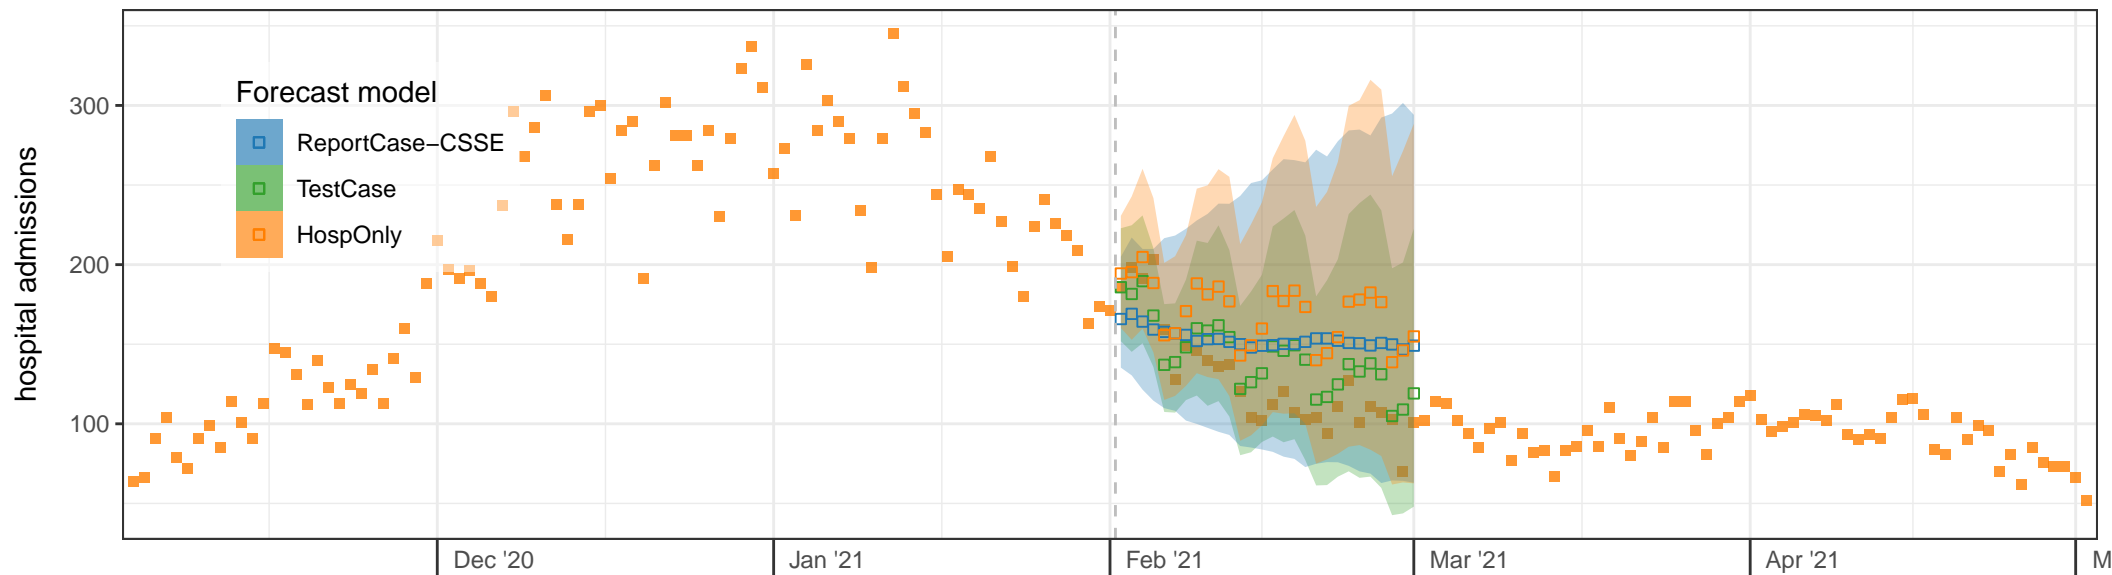

Massachusetts case data and forecasts: 2021-02-08

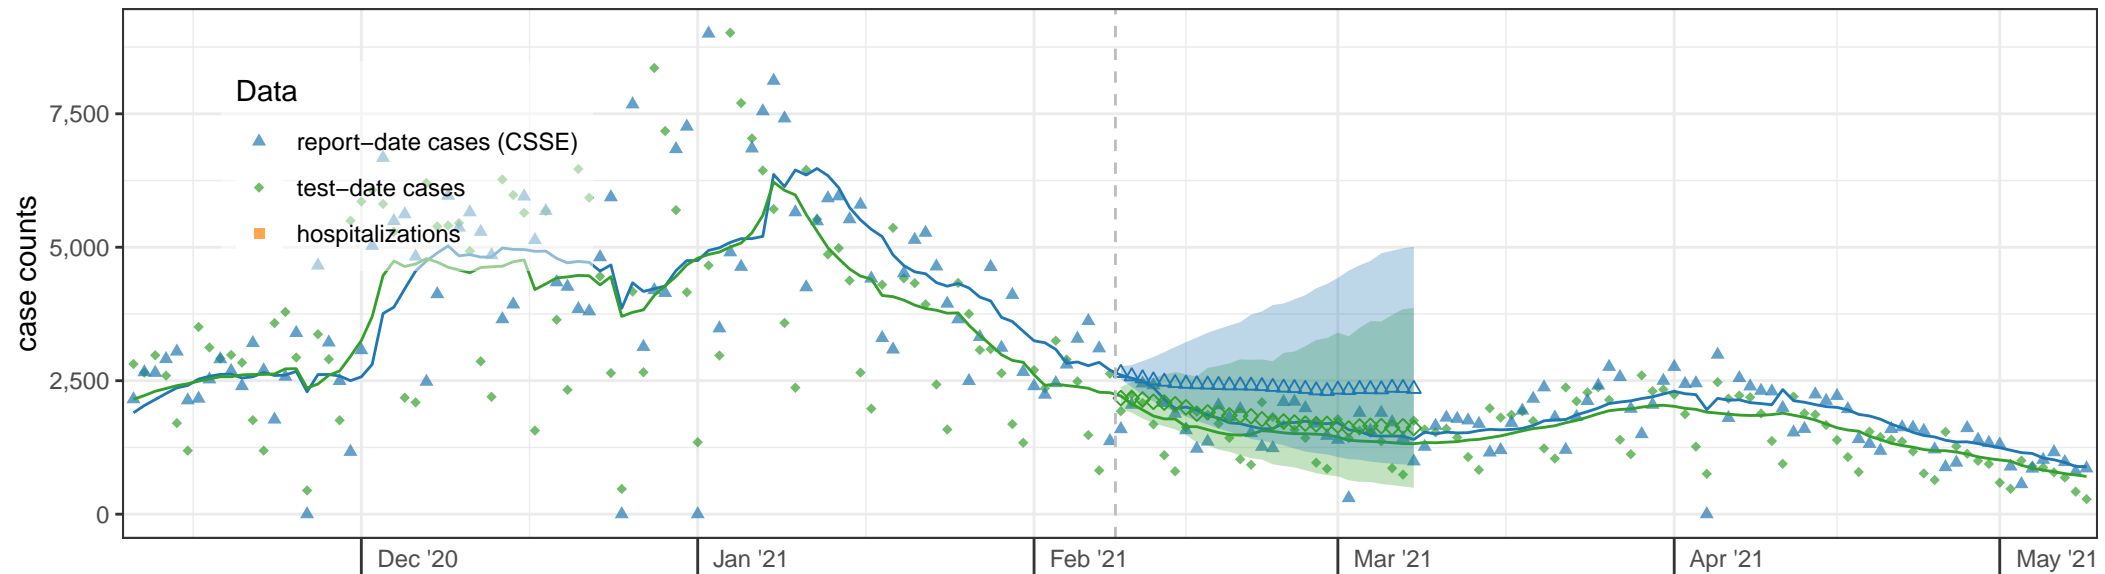

Massachusetts hospitalization data and forecasts: 2021-02-08

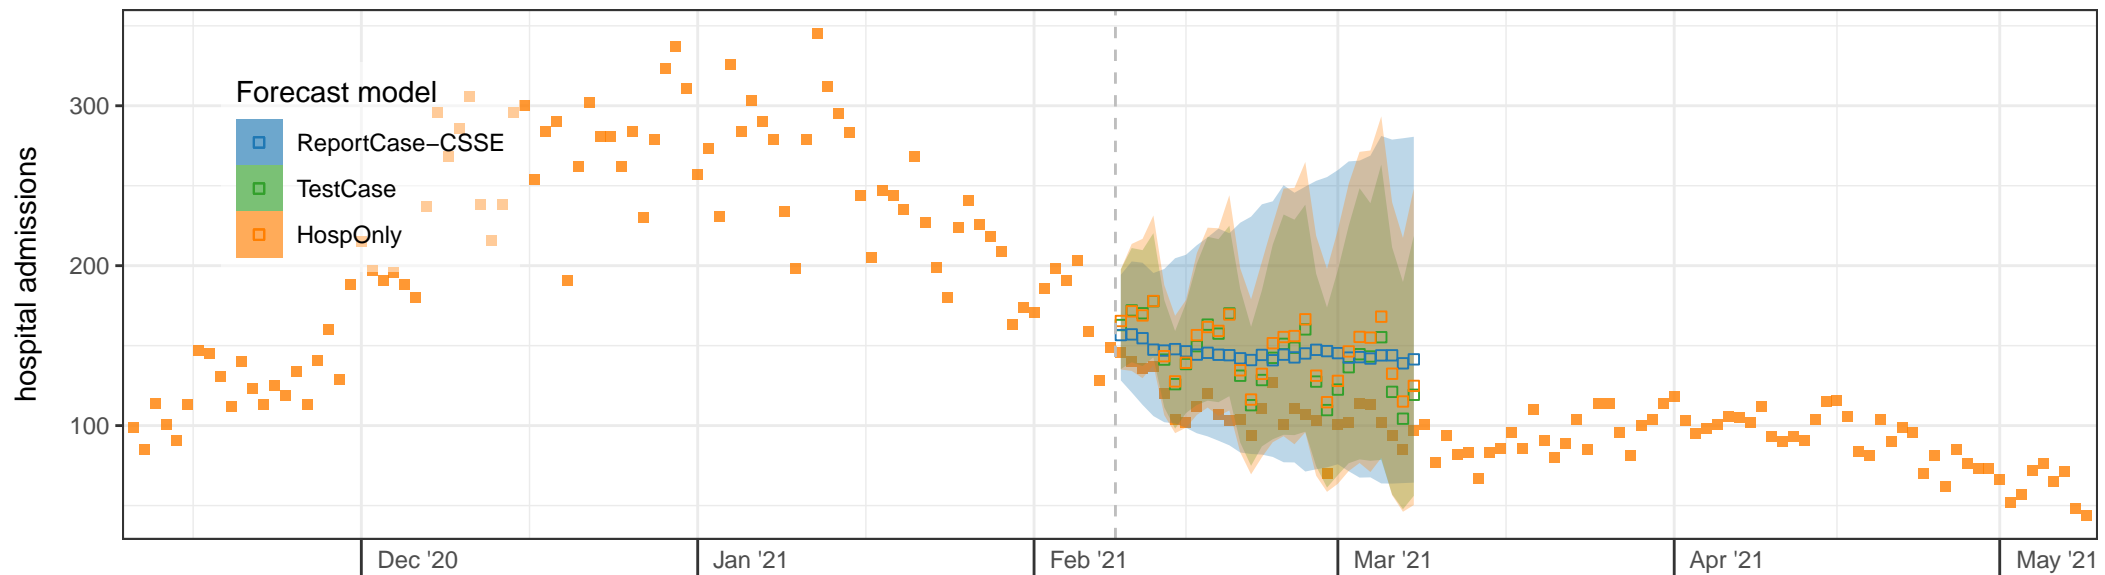



Massachusetts case data and forecasts: 2021-02-15

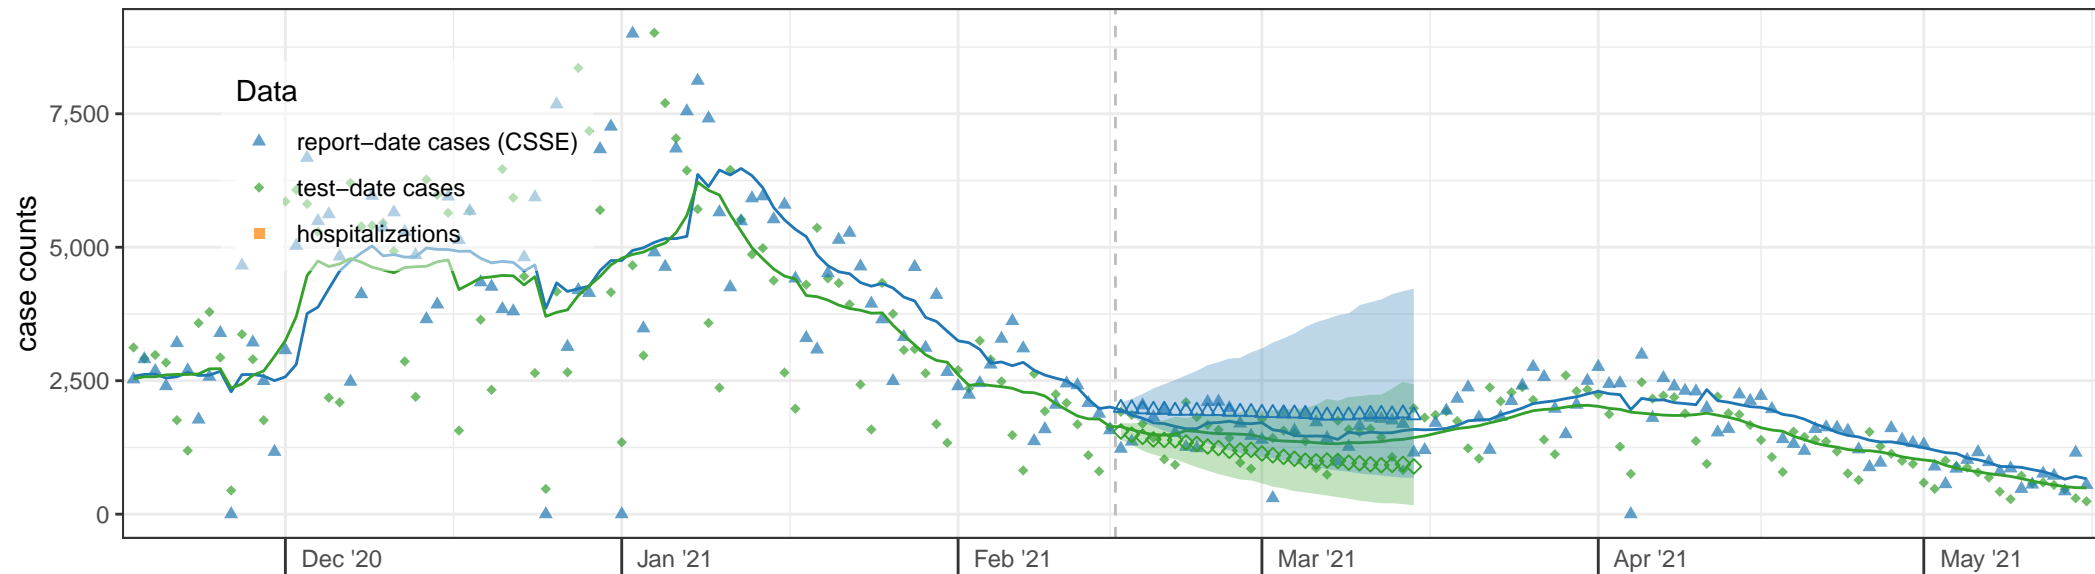

Massachusetts hospitalization data and forecasts: 2021-02-15

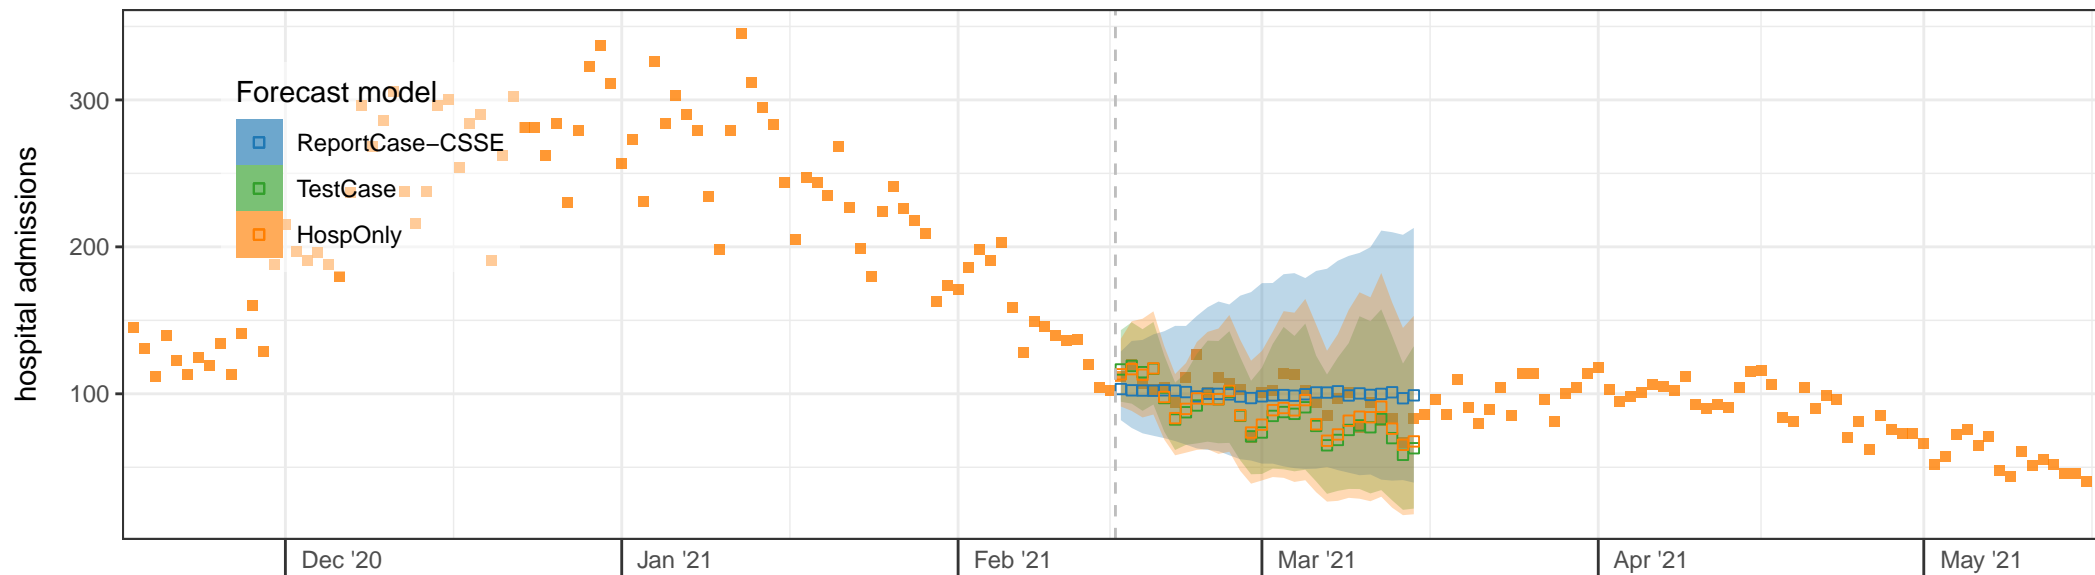

Massachusetts case data and forecasts: 2021-02-22

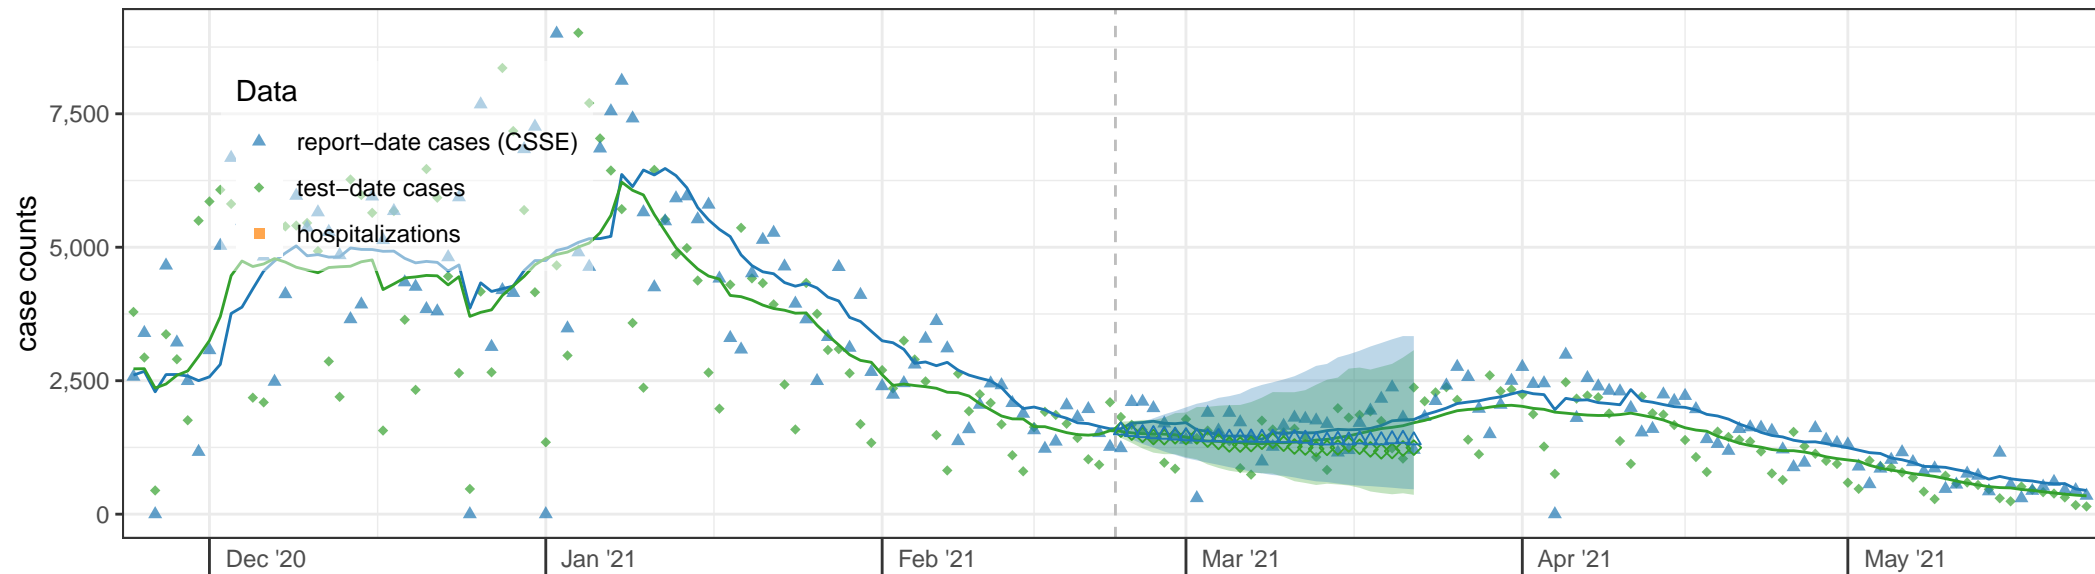

Massachusetts hospitalization data and forecasts: 2021-02-22

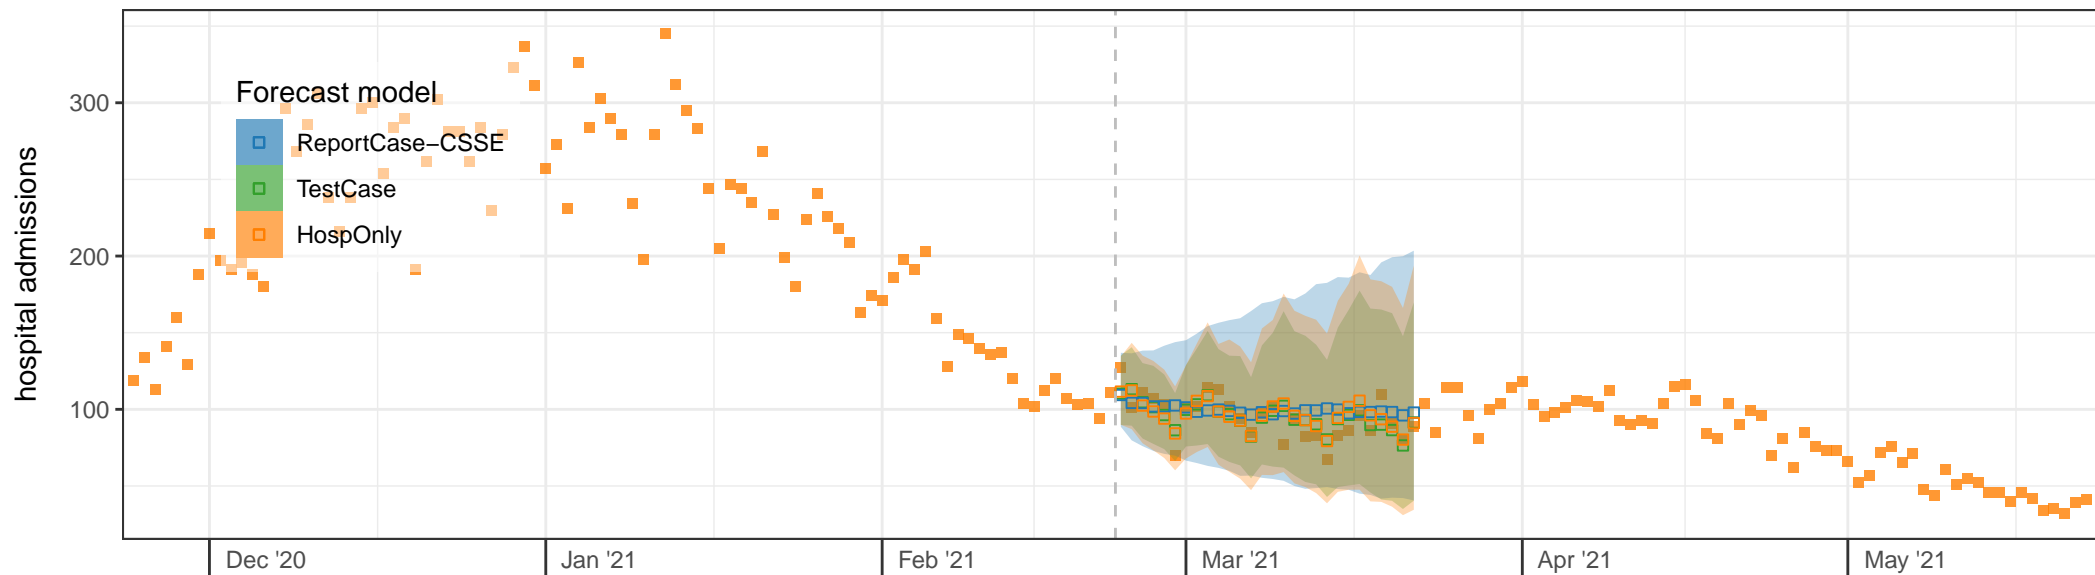

Massachusetts case data and forecasts: 2021-03-01

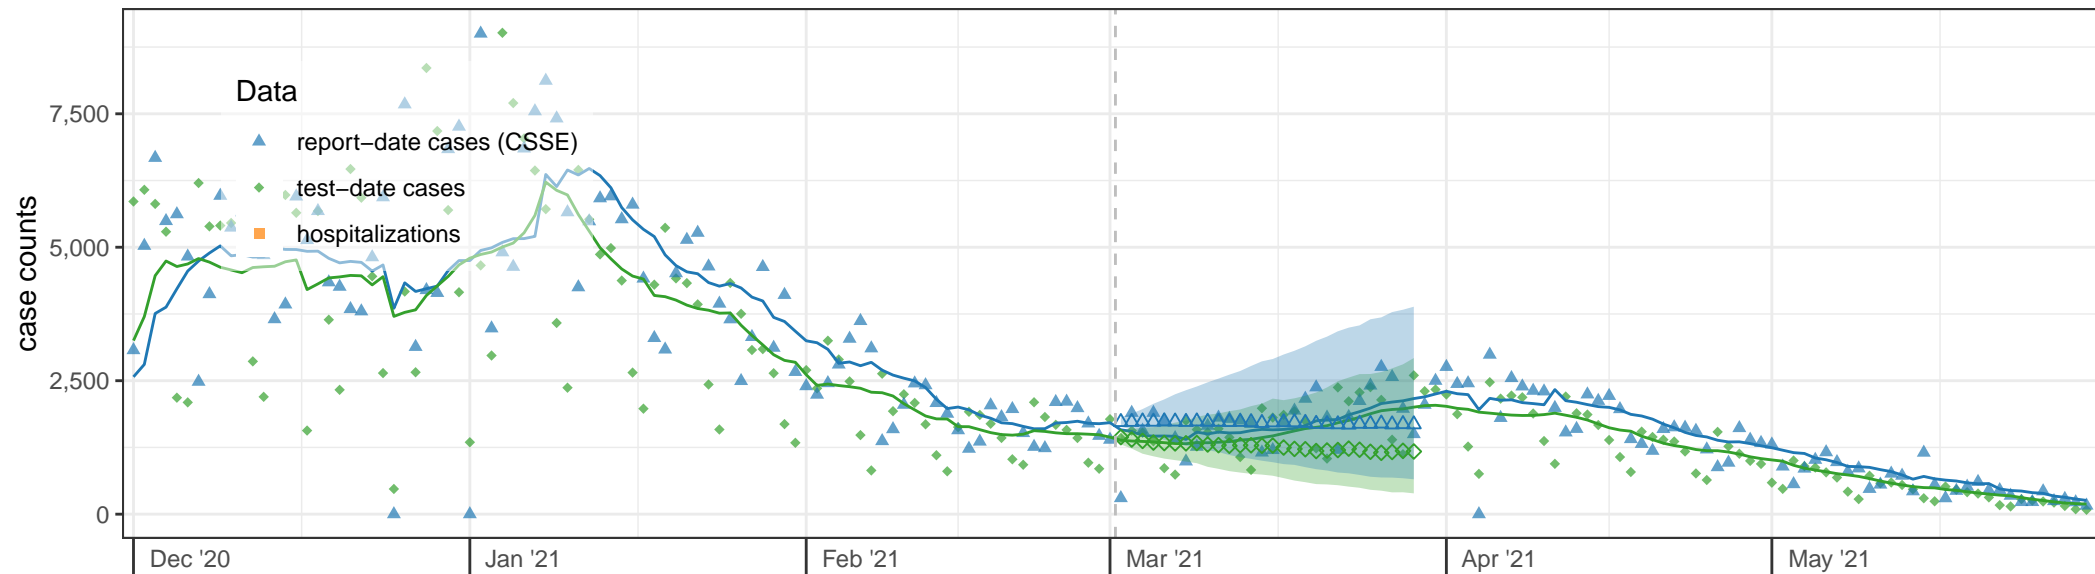

Massachusetts hospitalization data and forecasts: 2021-03-01

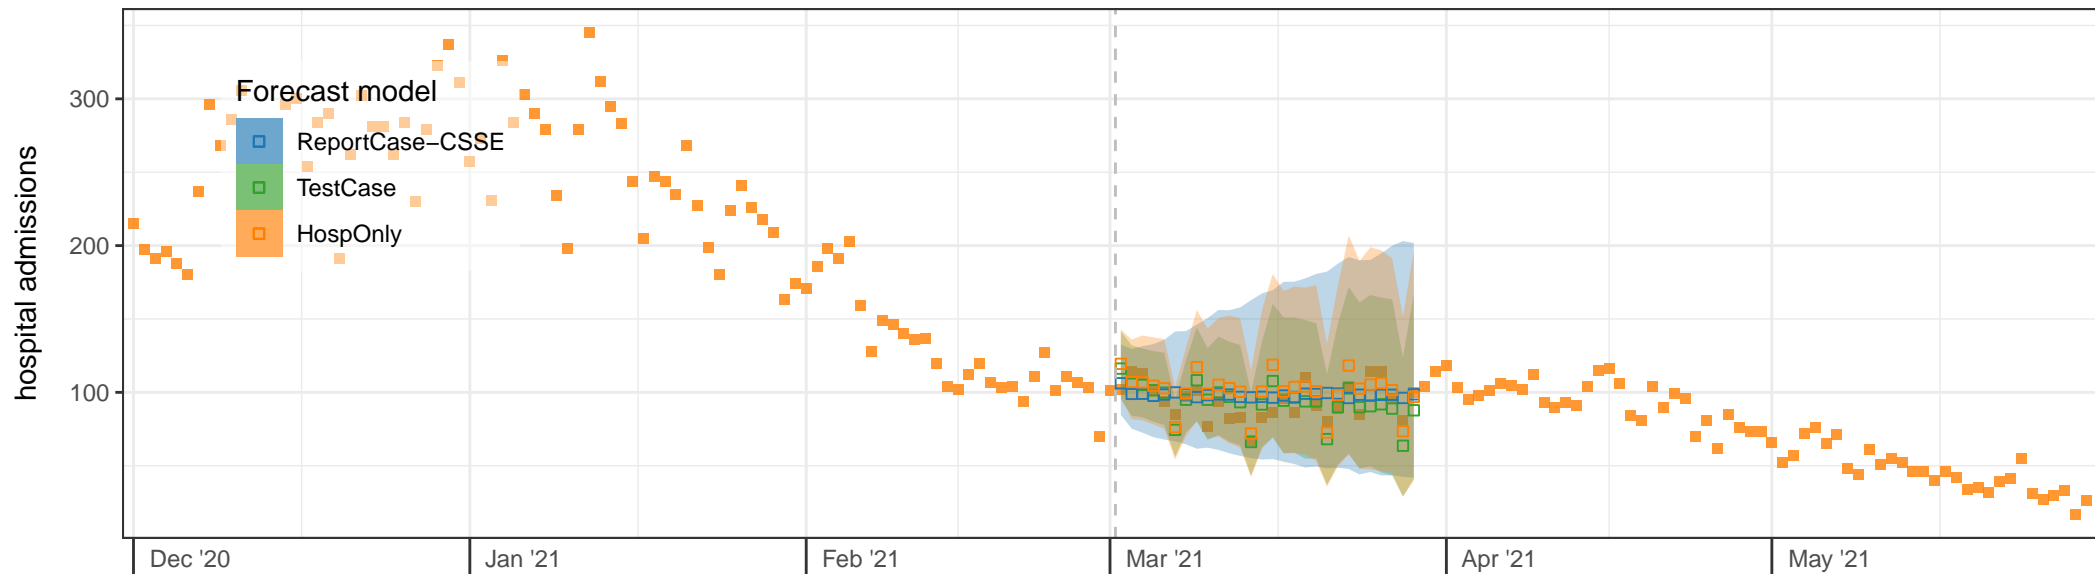

Massachusetts case data and forecasts: 2021-03-08

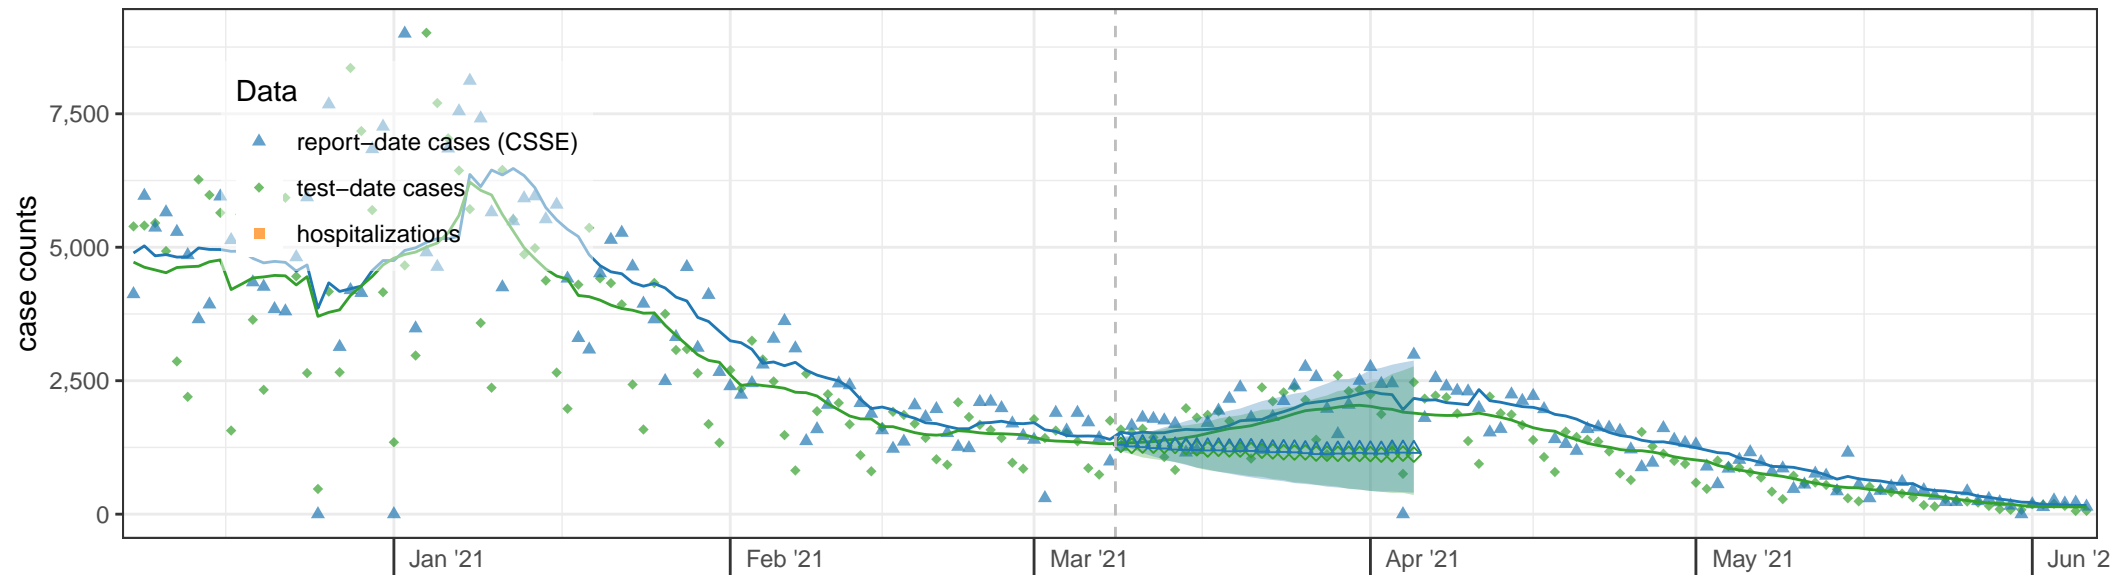

Massachusetts hospitalization data and forecasts: 2021-03-08

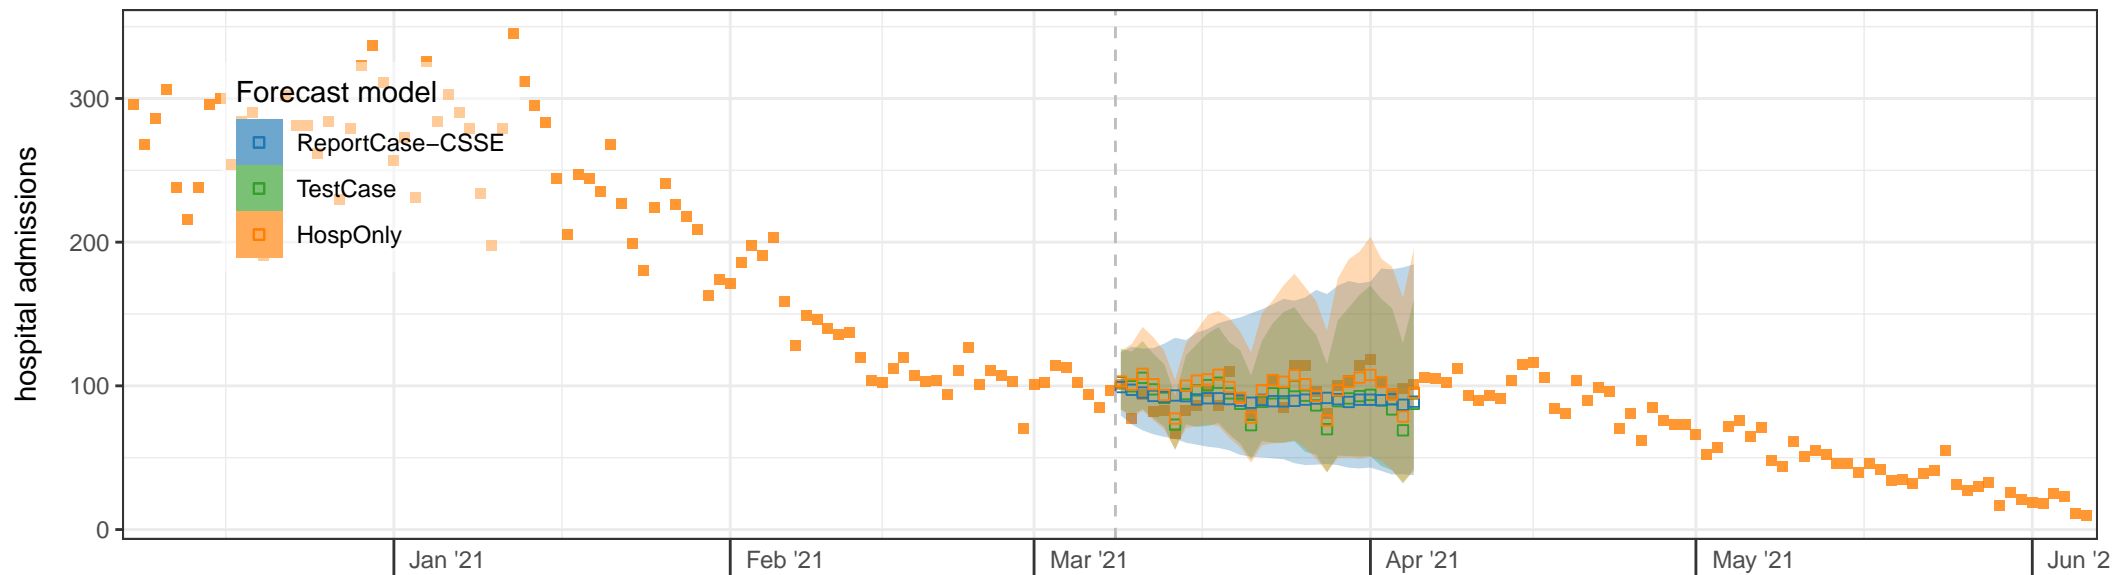

Massachusetts case data and forecasts: 2021-03-15

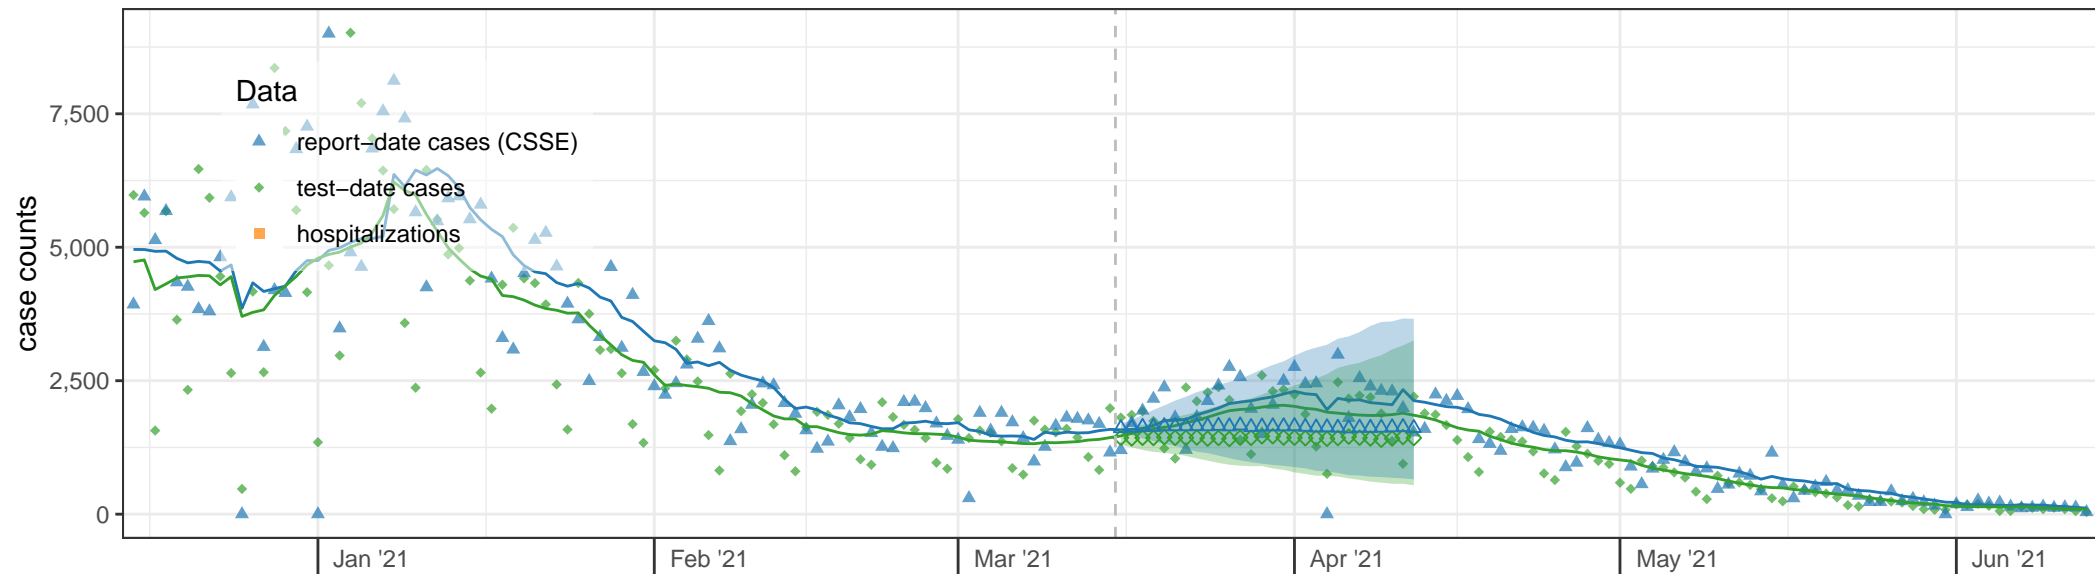

Massachusetts hospitalization data and forecasts: 2021-03-15

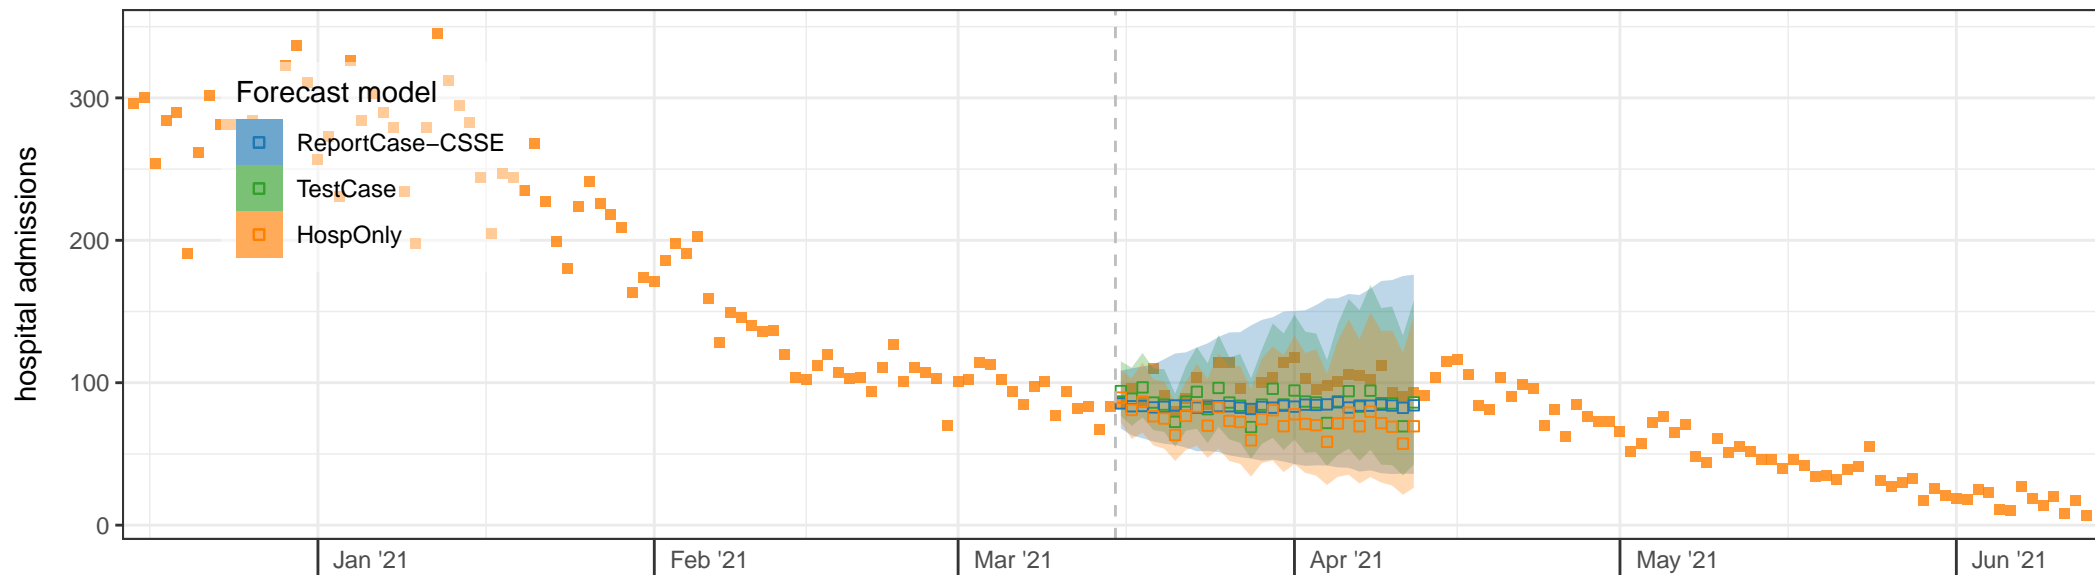

Massachusetts case data and forecasts: 2021-03-22

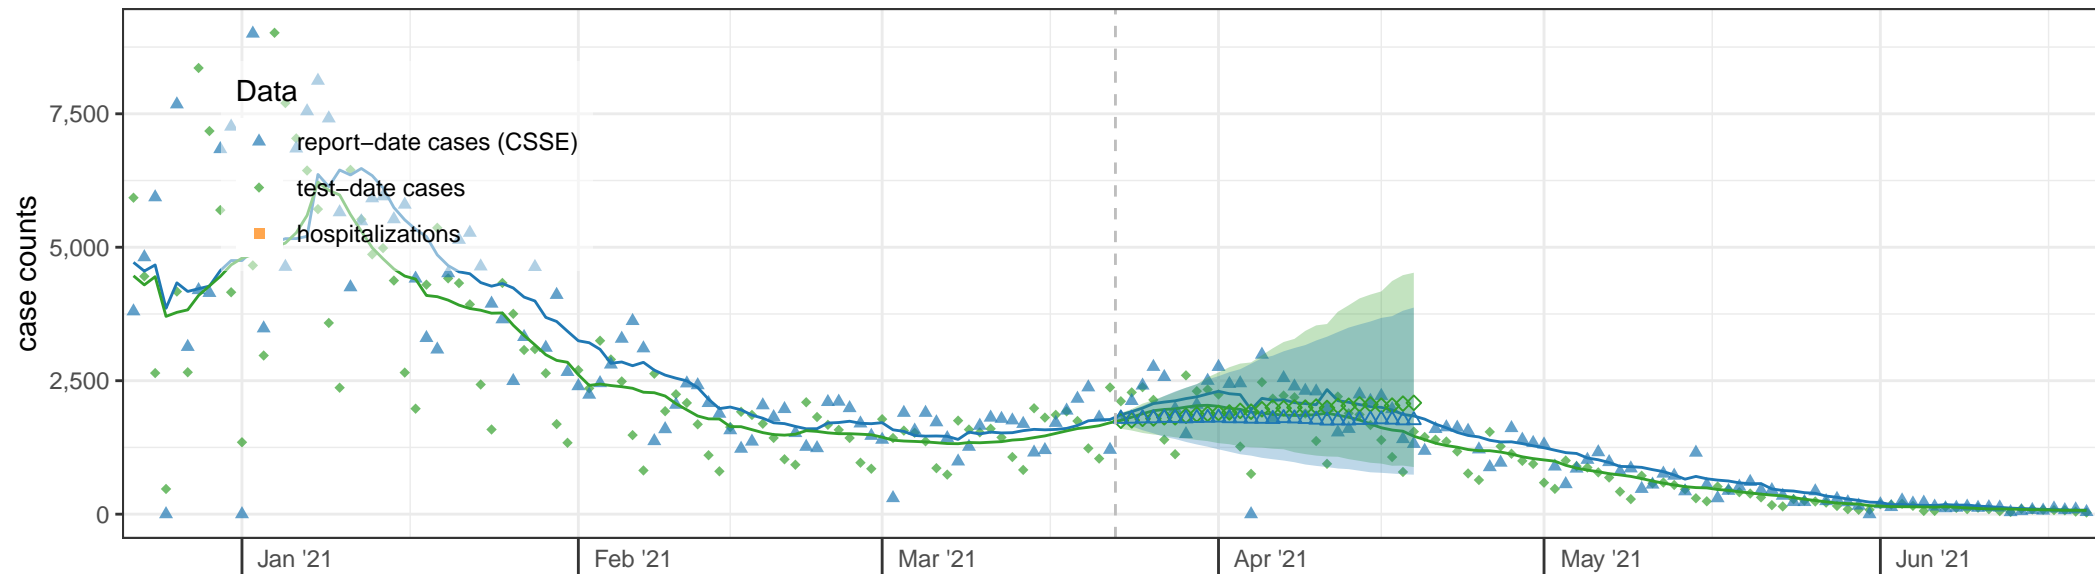

Massachusetts hospitalization data and forecasts: 2021-03-22

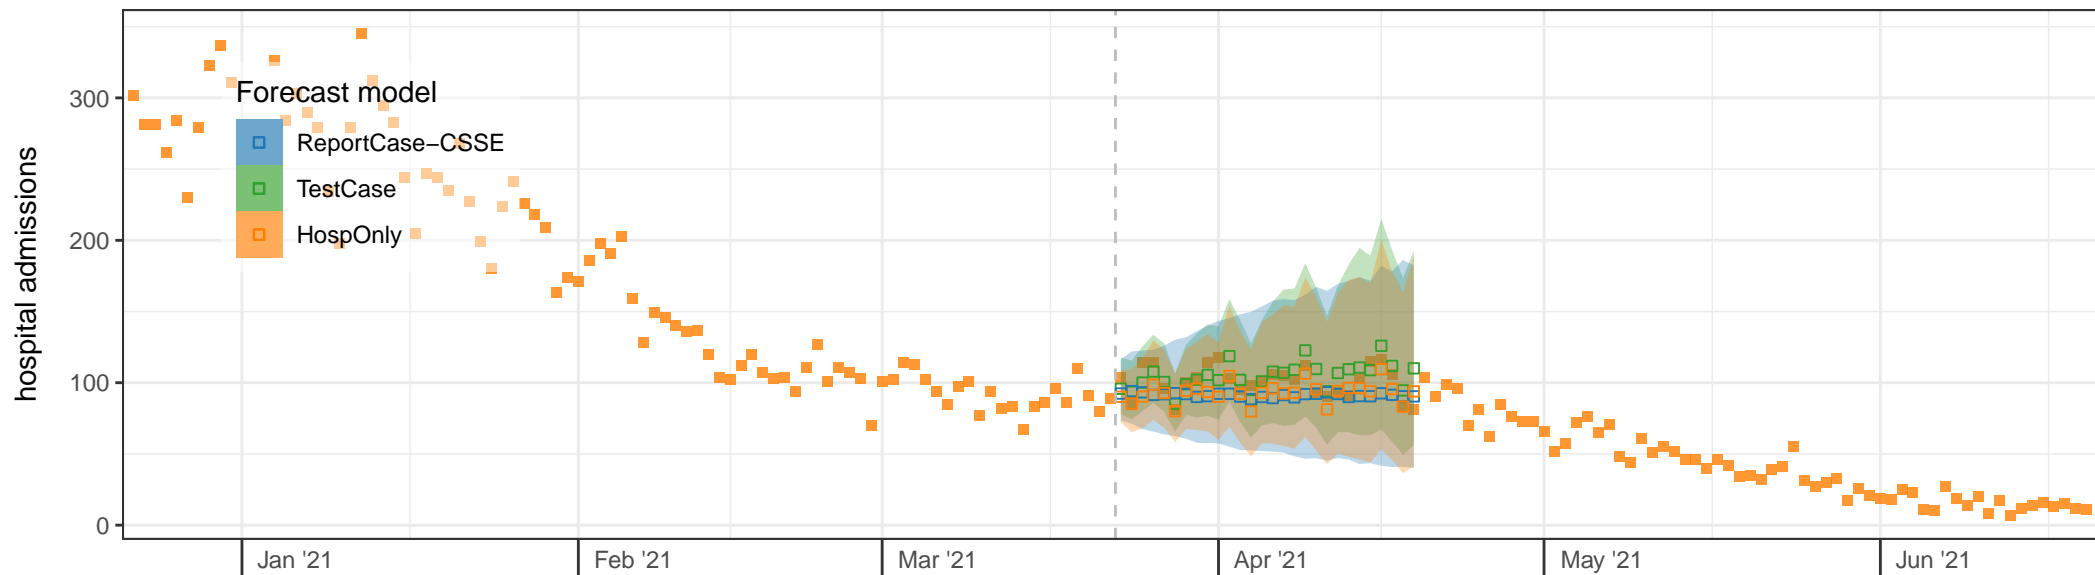

Massachusetts case data and forecasts: 2021-03-29

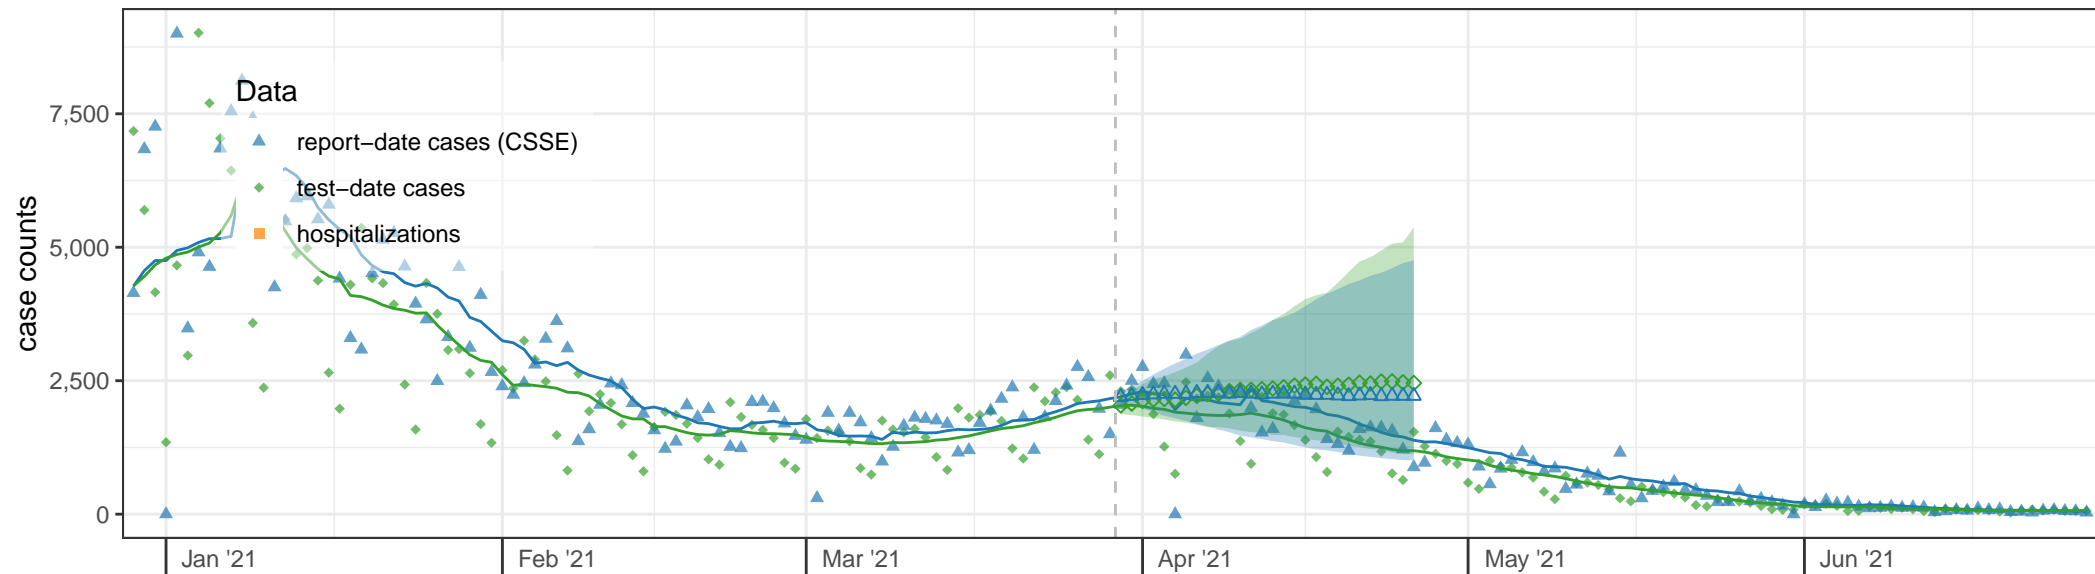

Massachusetts hospitalization data and forecasts: 2021-03-29

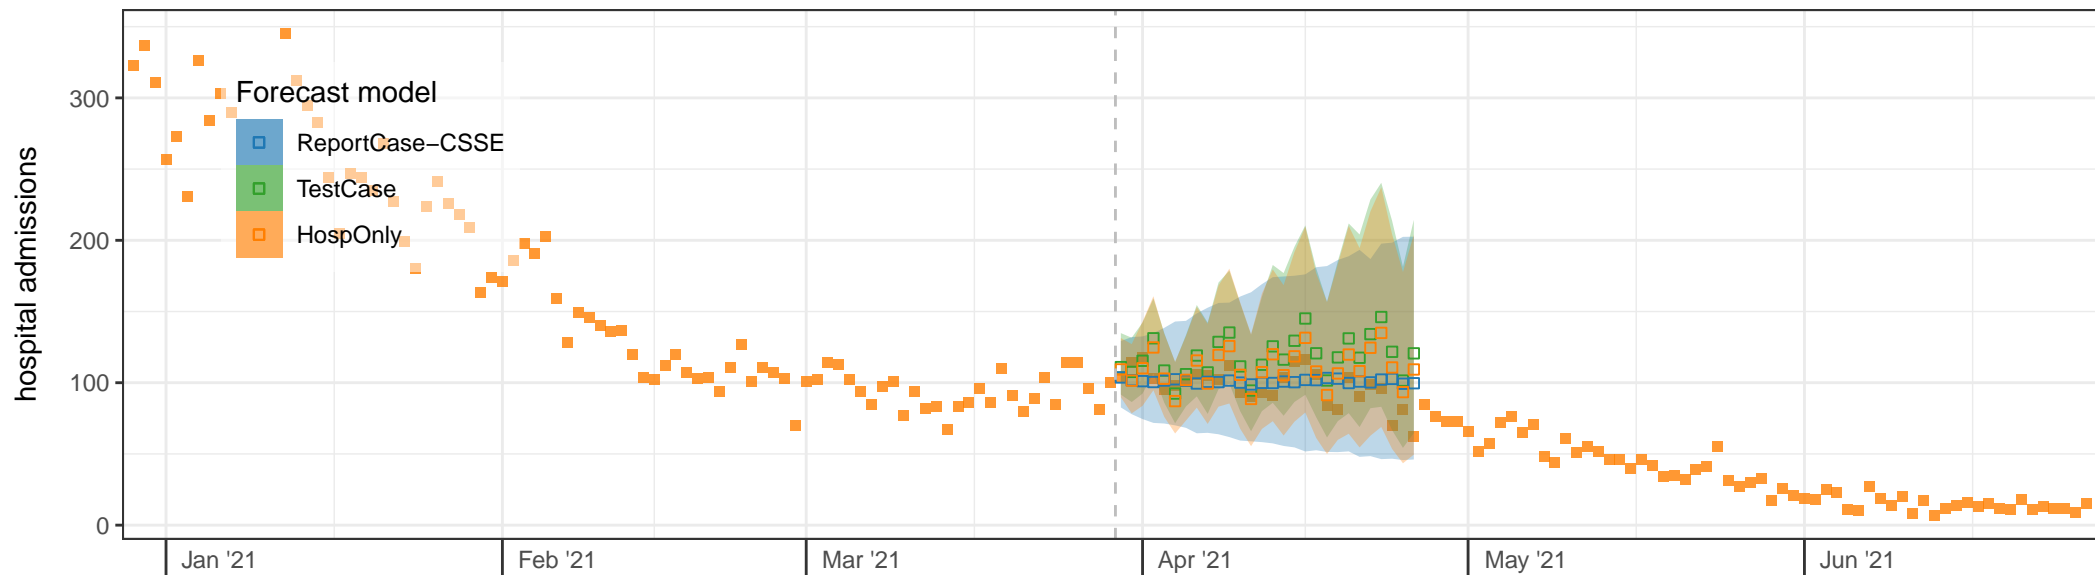

Massachusetts case data and forecasts: 2021-04-05

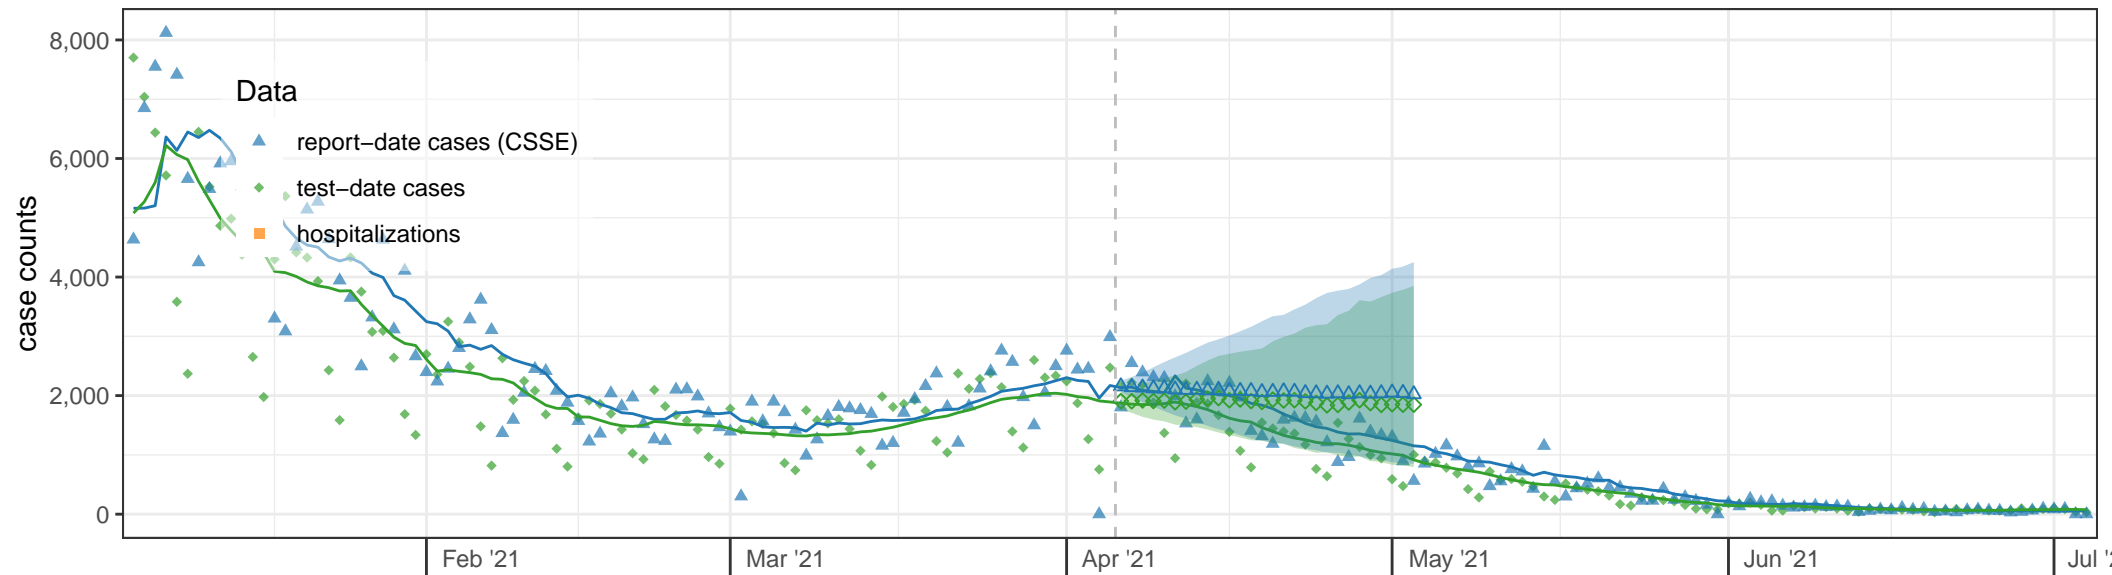

Massachusetts hospitalization data and forecasts: 2021-04-05

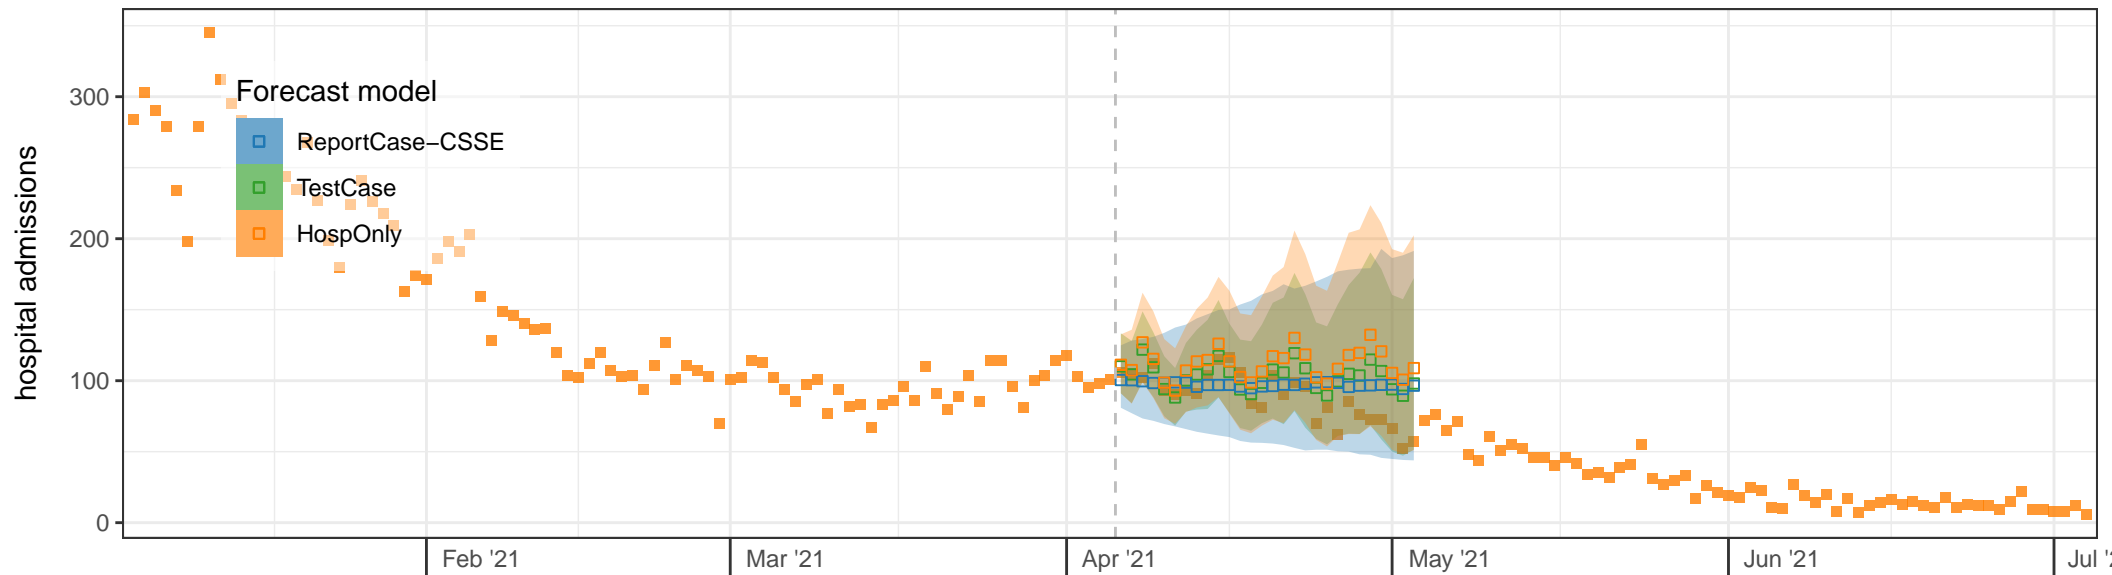



Massachusetts case data and forecasts: 2021-04-12

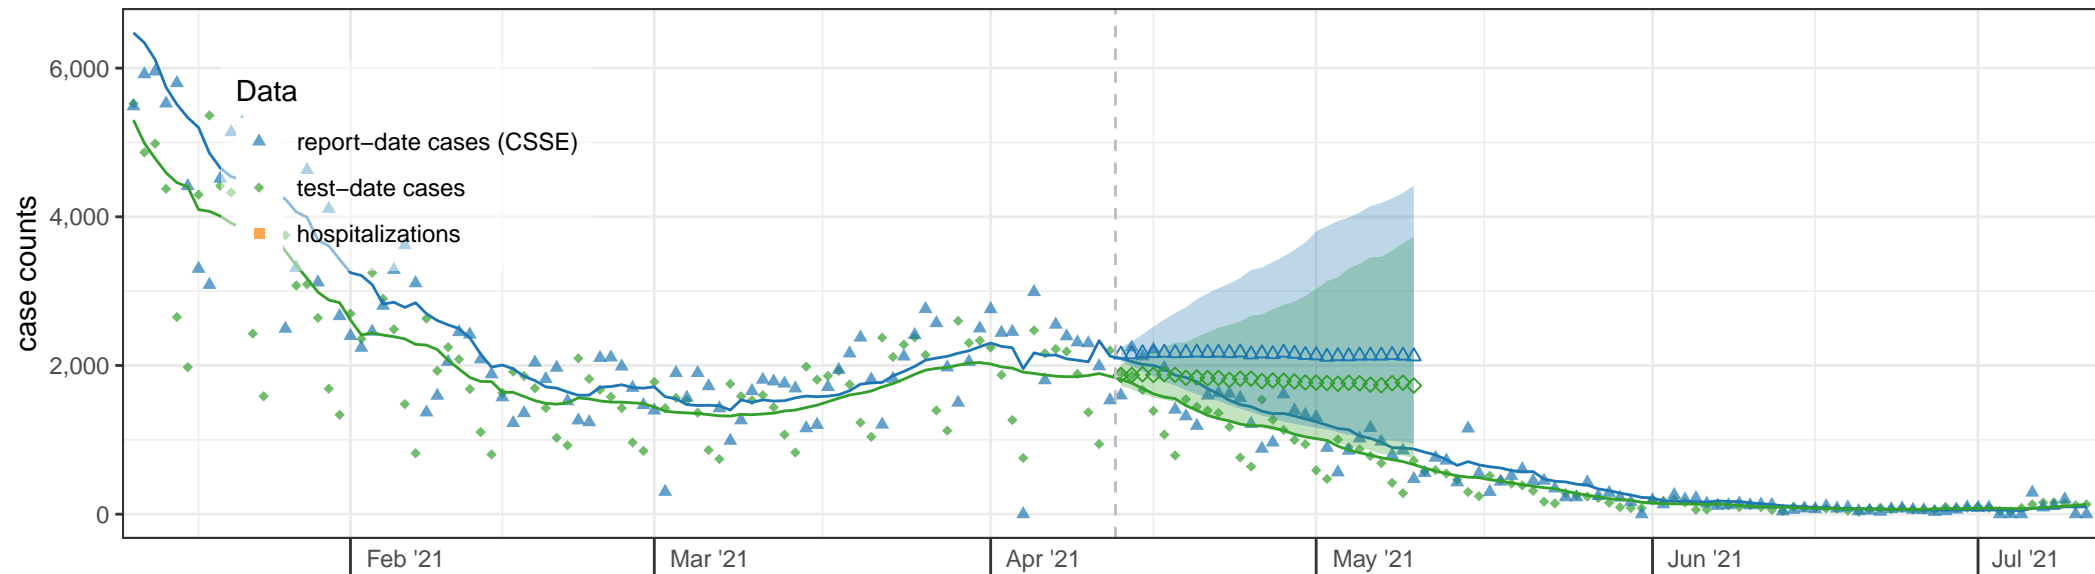

Massachusetts hospitalization data and forecasts: 2021-04-12

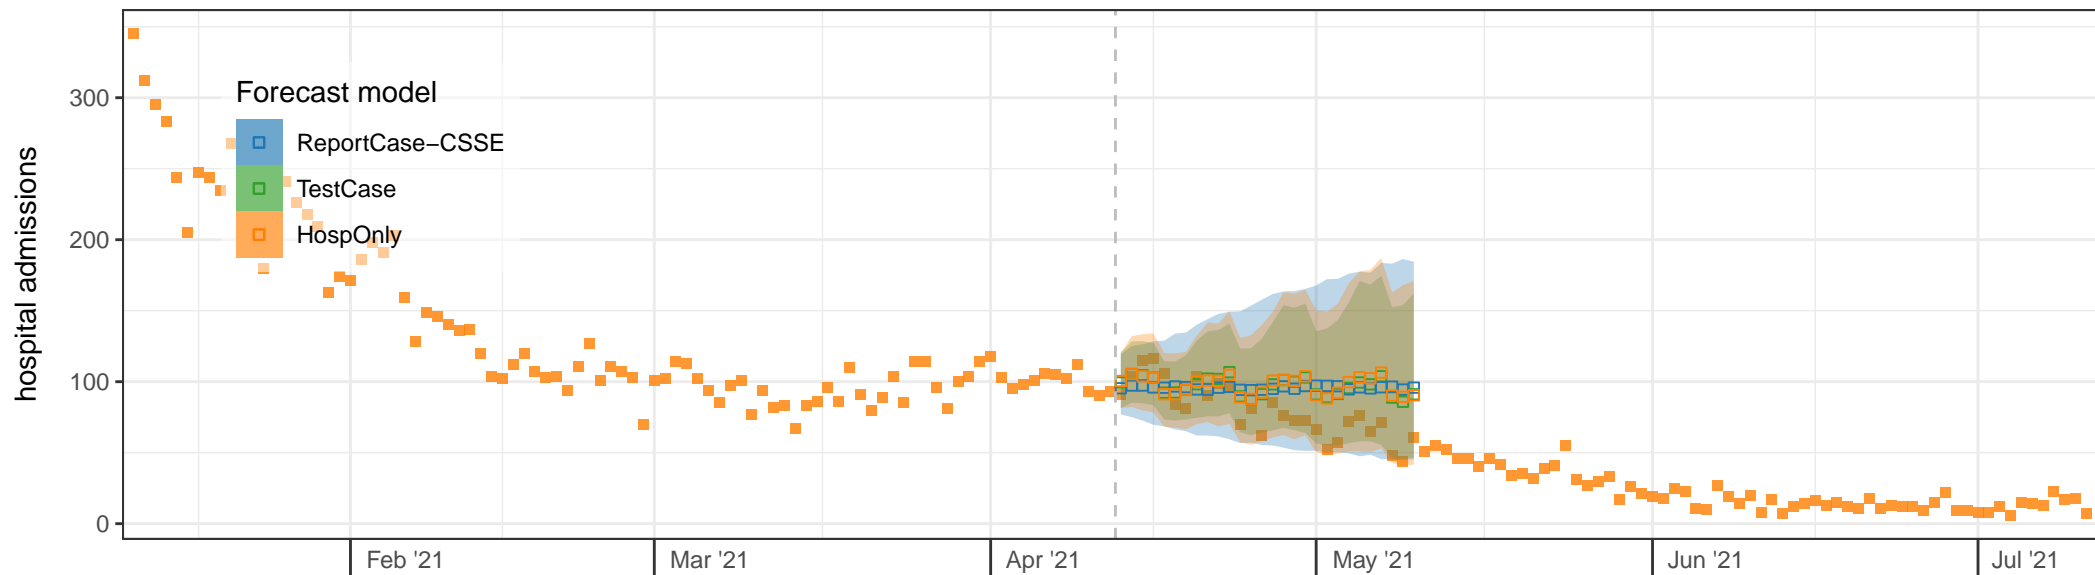

Massachusetts case data and forecasts: 2021-04-19

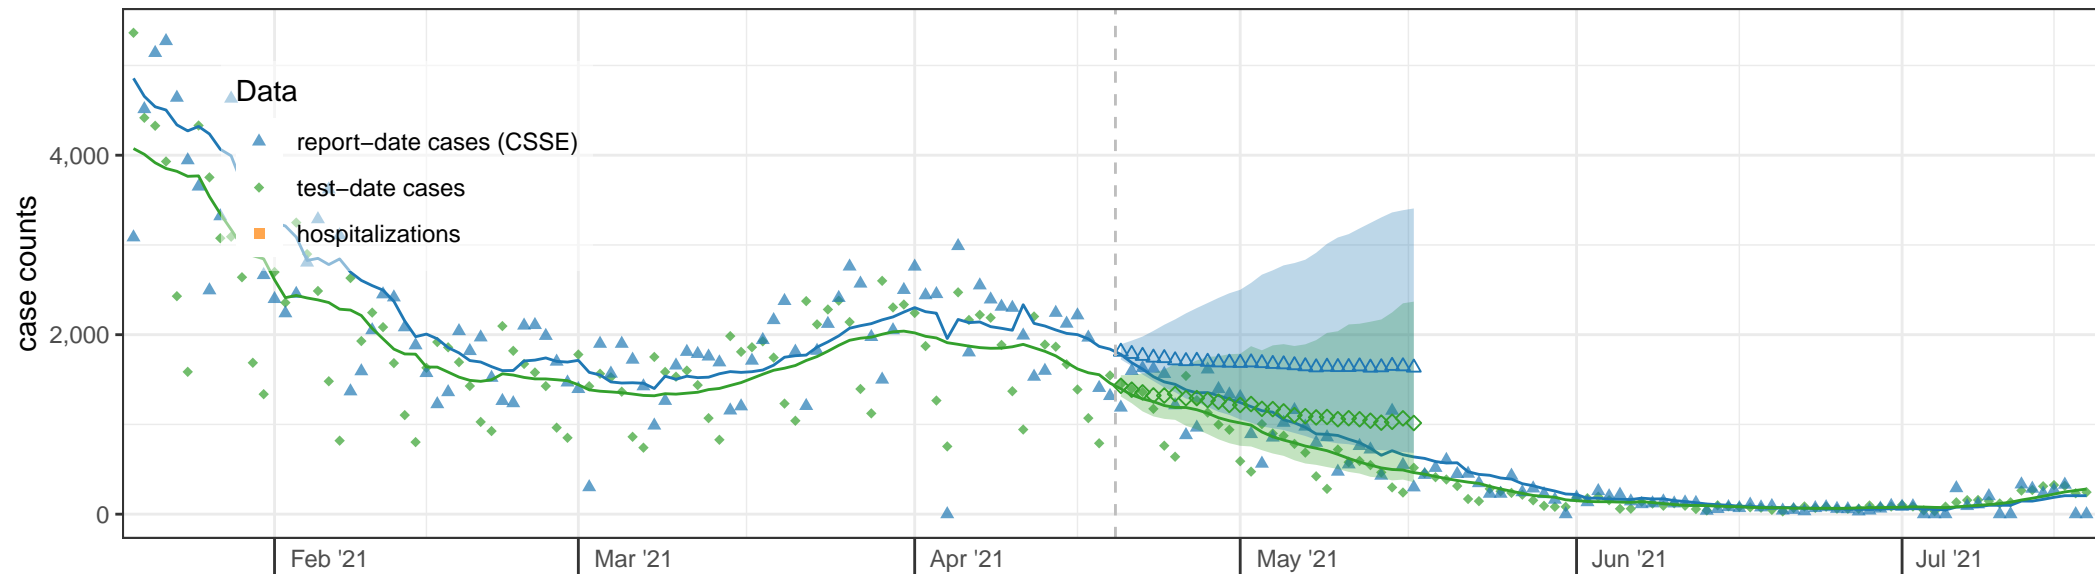

Massachusetts hospitalization data and forecasts: 2021-04-19

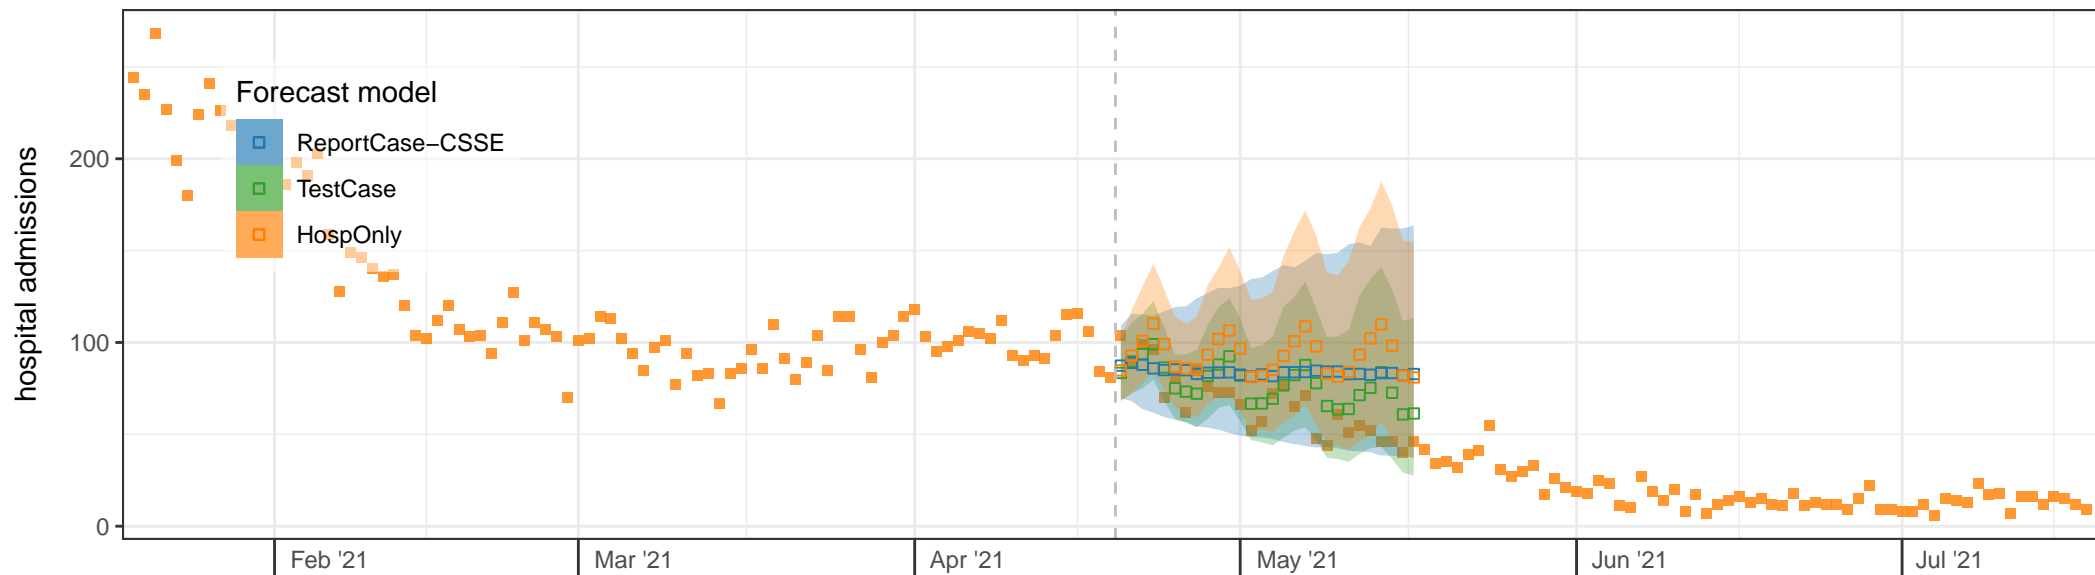

Massachusetts case data and forecasts: 2021-04-26

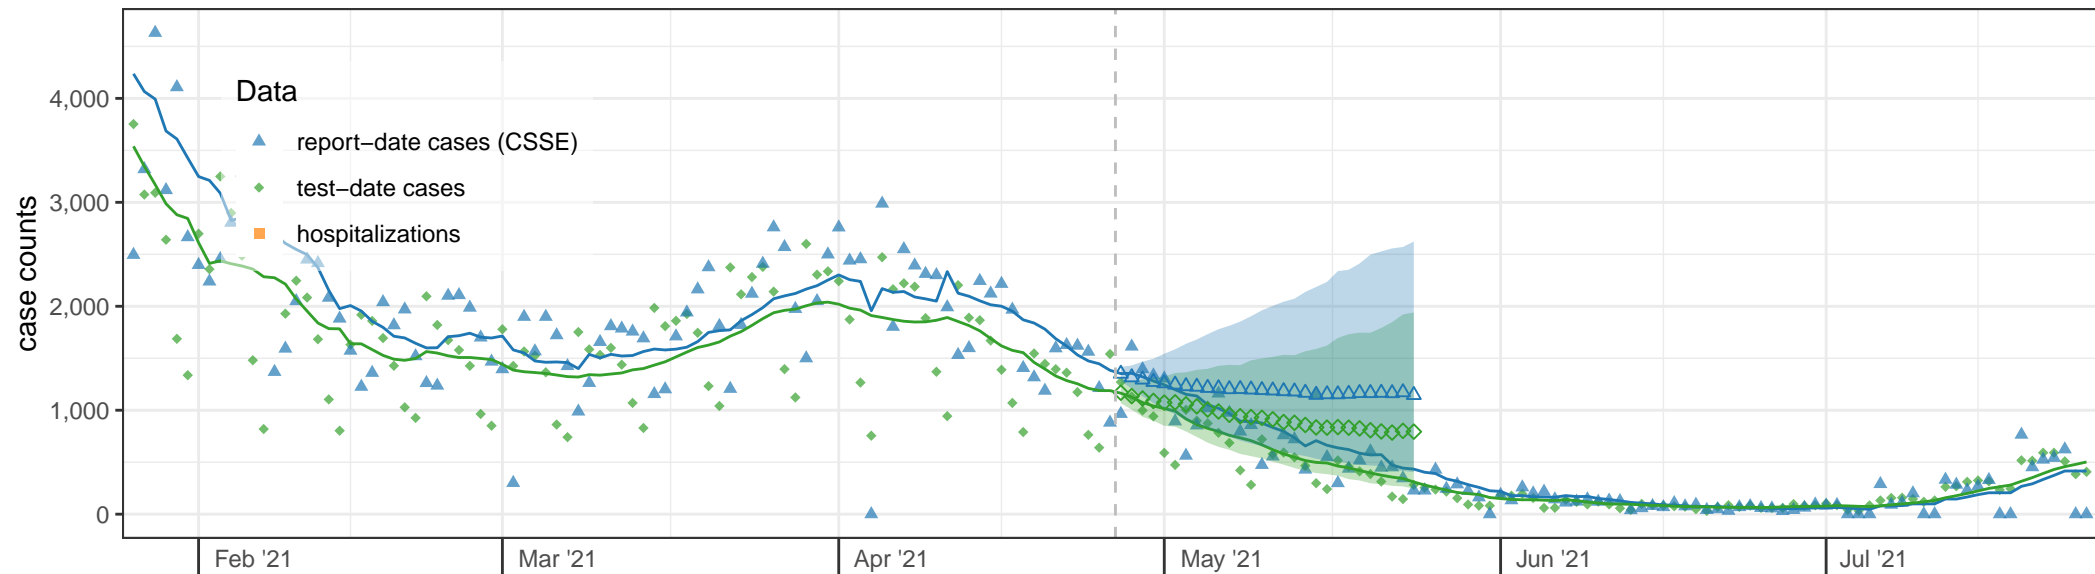

Massachusetts hospitalization data and forecasts: 2021-04-26

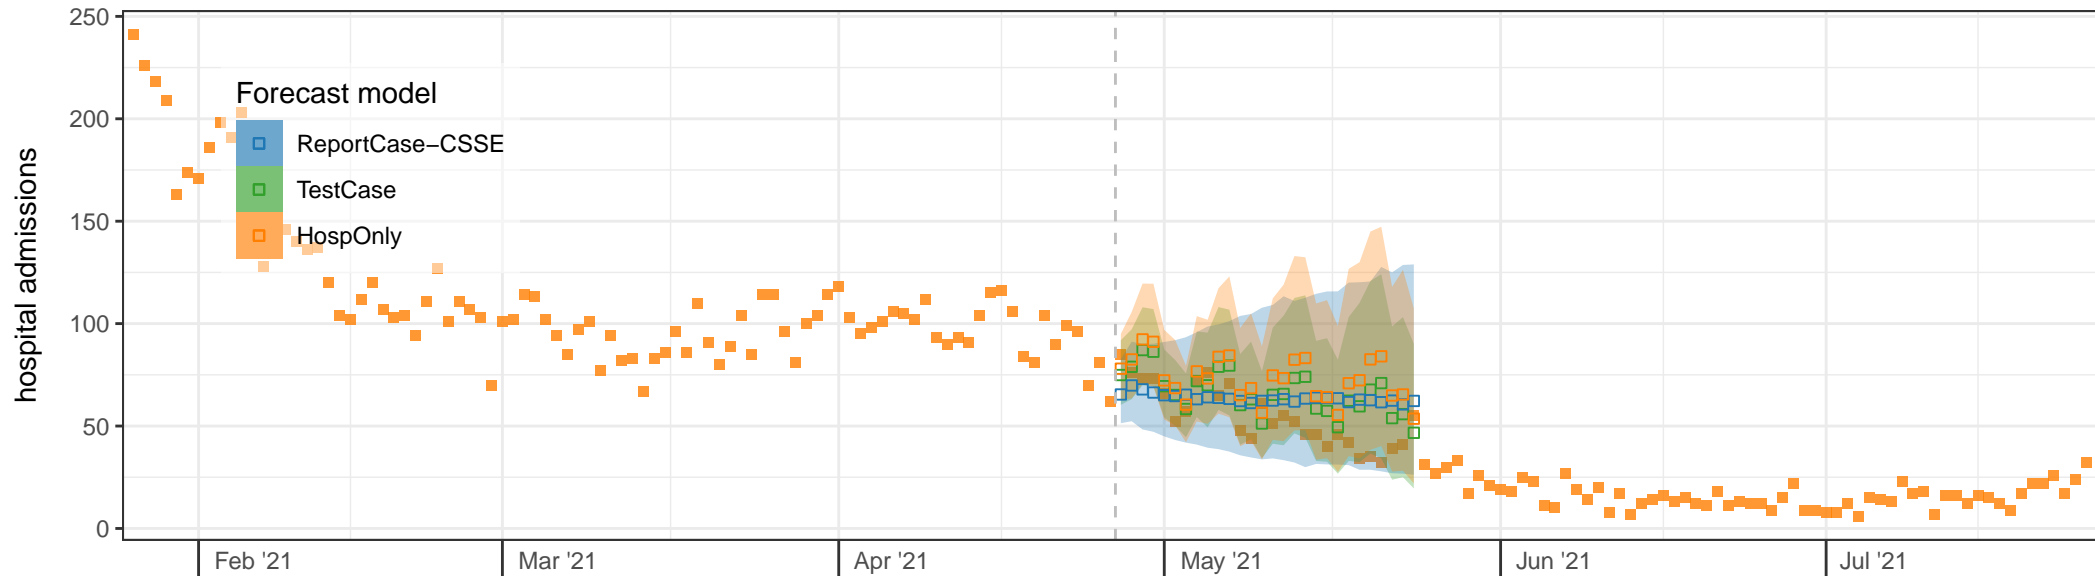

Massachusetts case data and forecasts: 2021-05-03

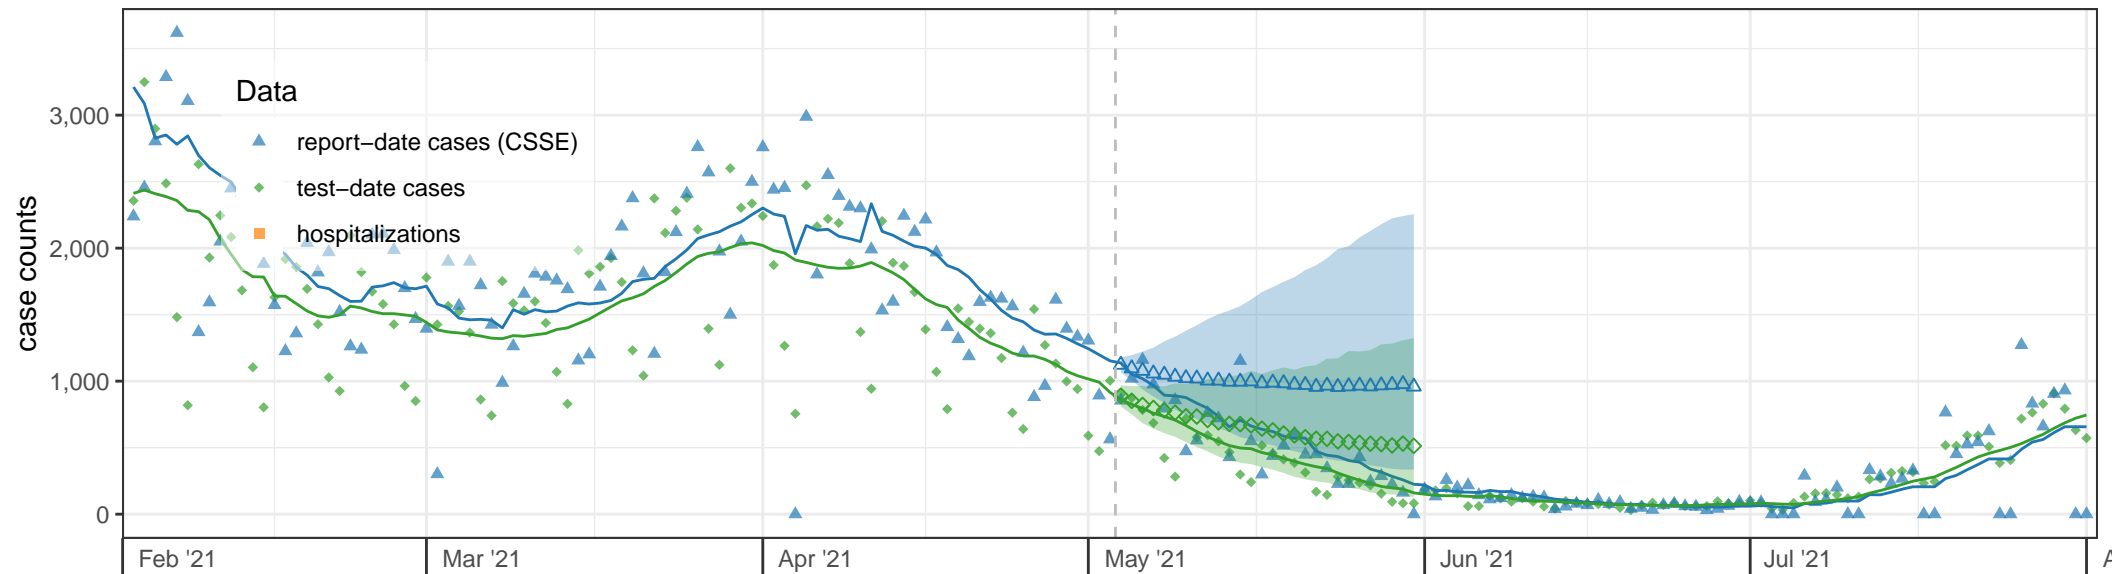

Massachusetts hospitalization data and forecasts: 2021-05-03

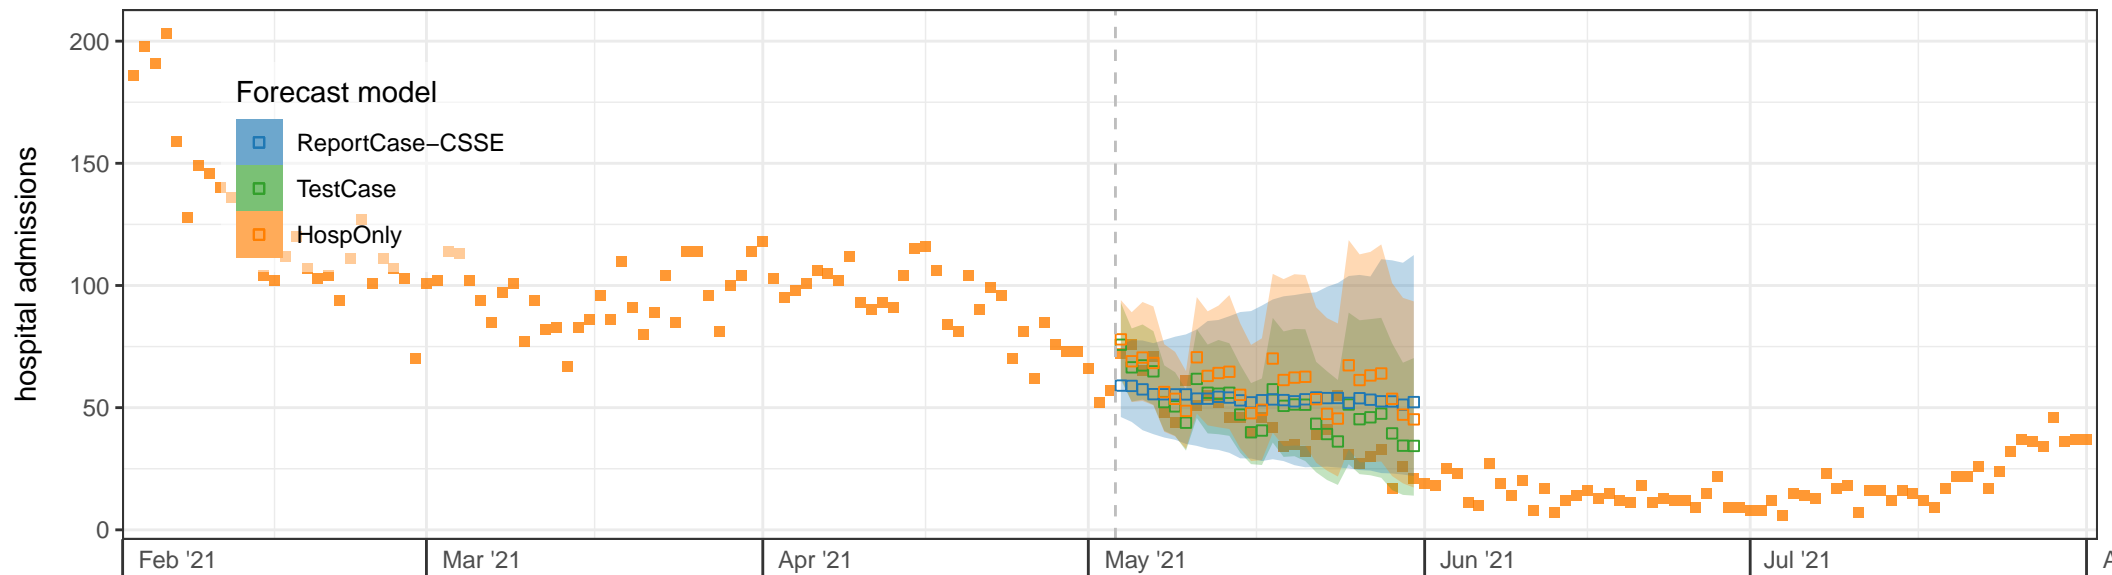

Massachusetts case data and forecasts: 2021-05-10

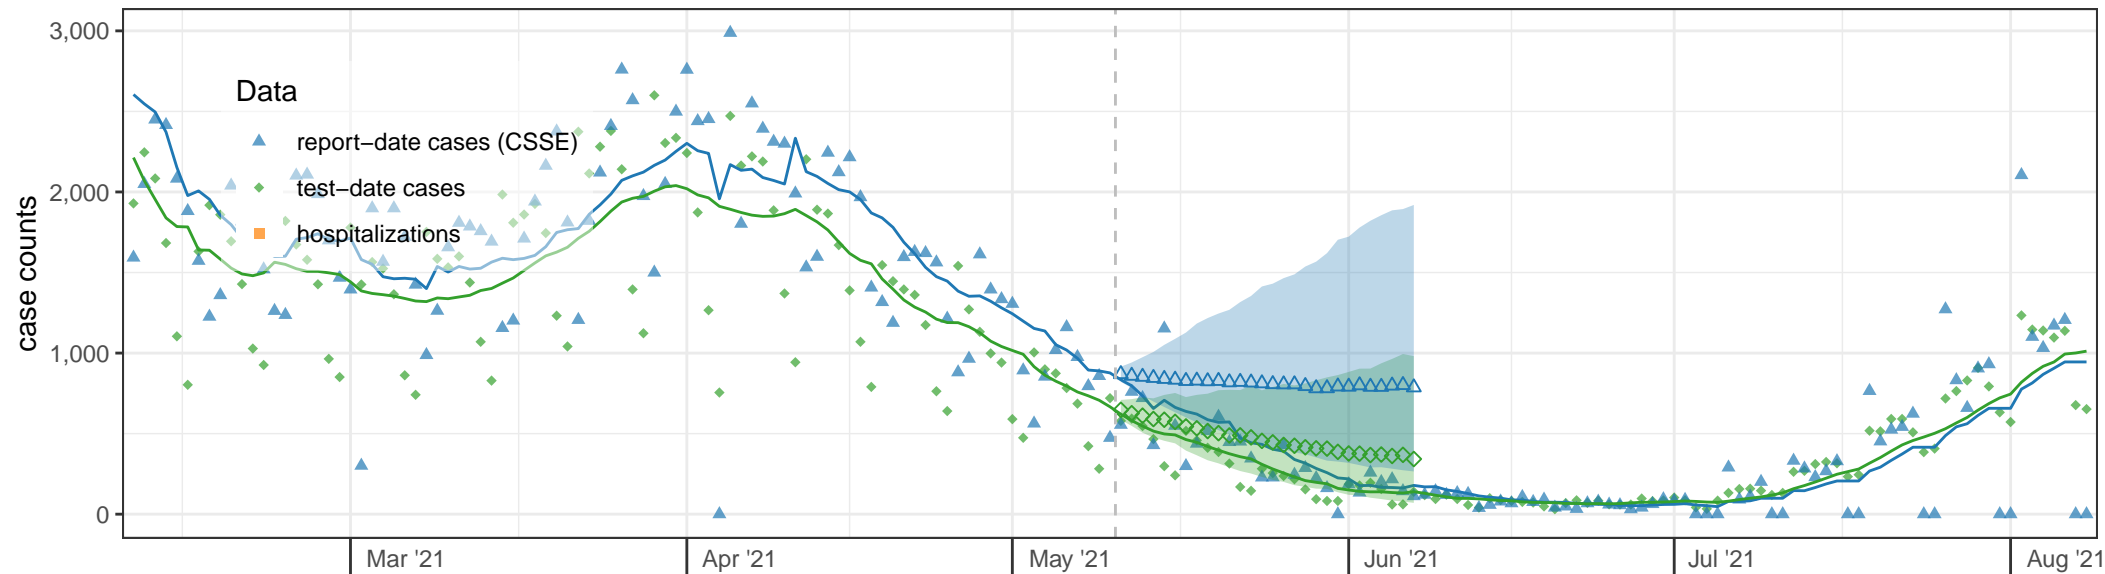

Massachusetts hospitalization data and forecasts: 2021-05-10

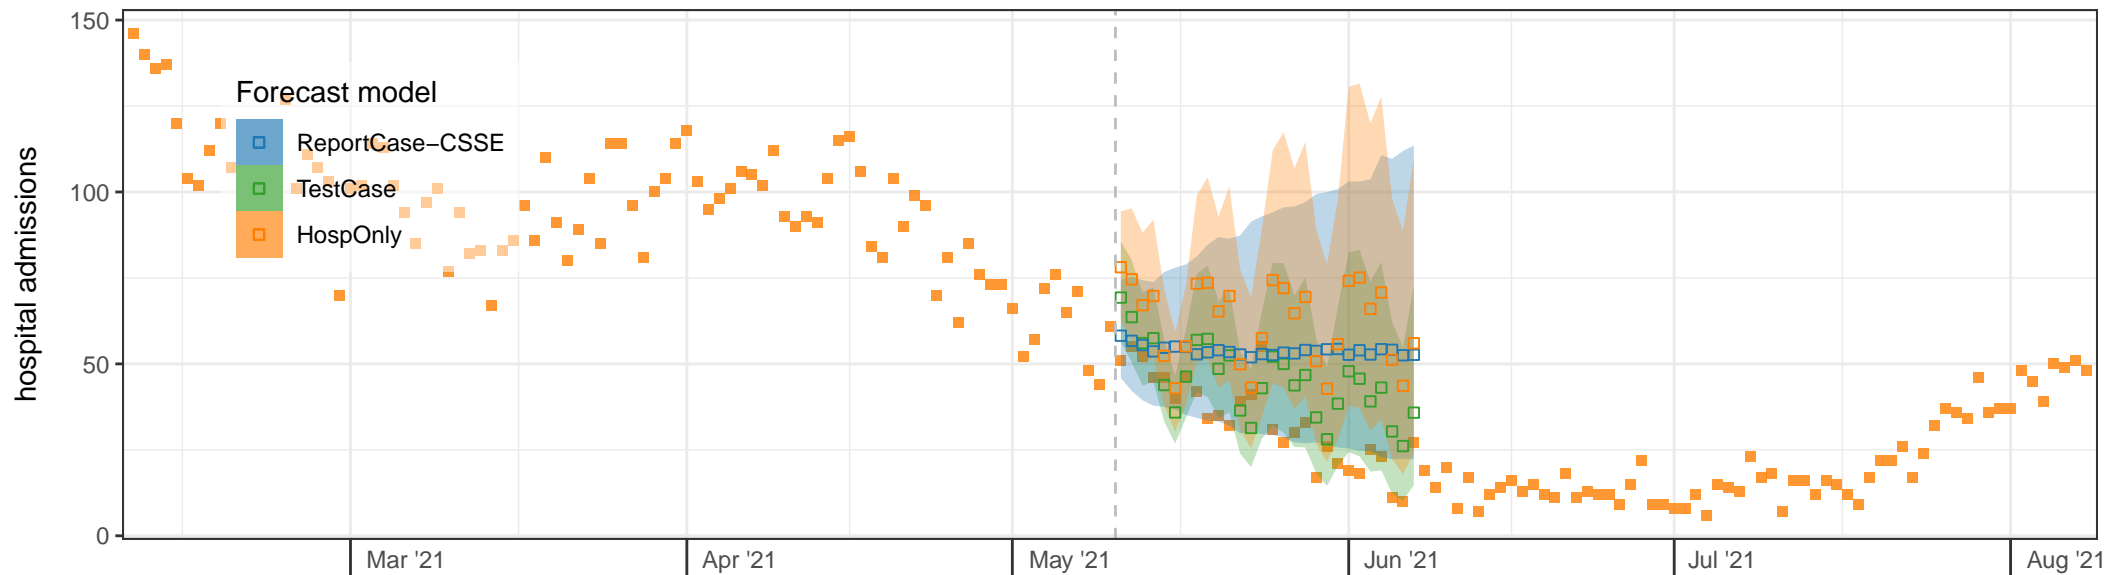

Massachusetts case data and forecasts: 2021-05-17

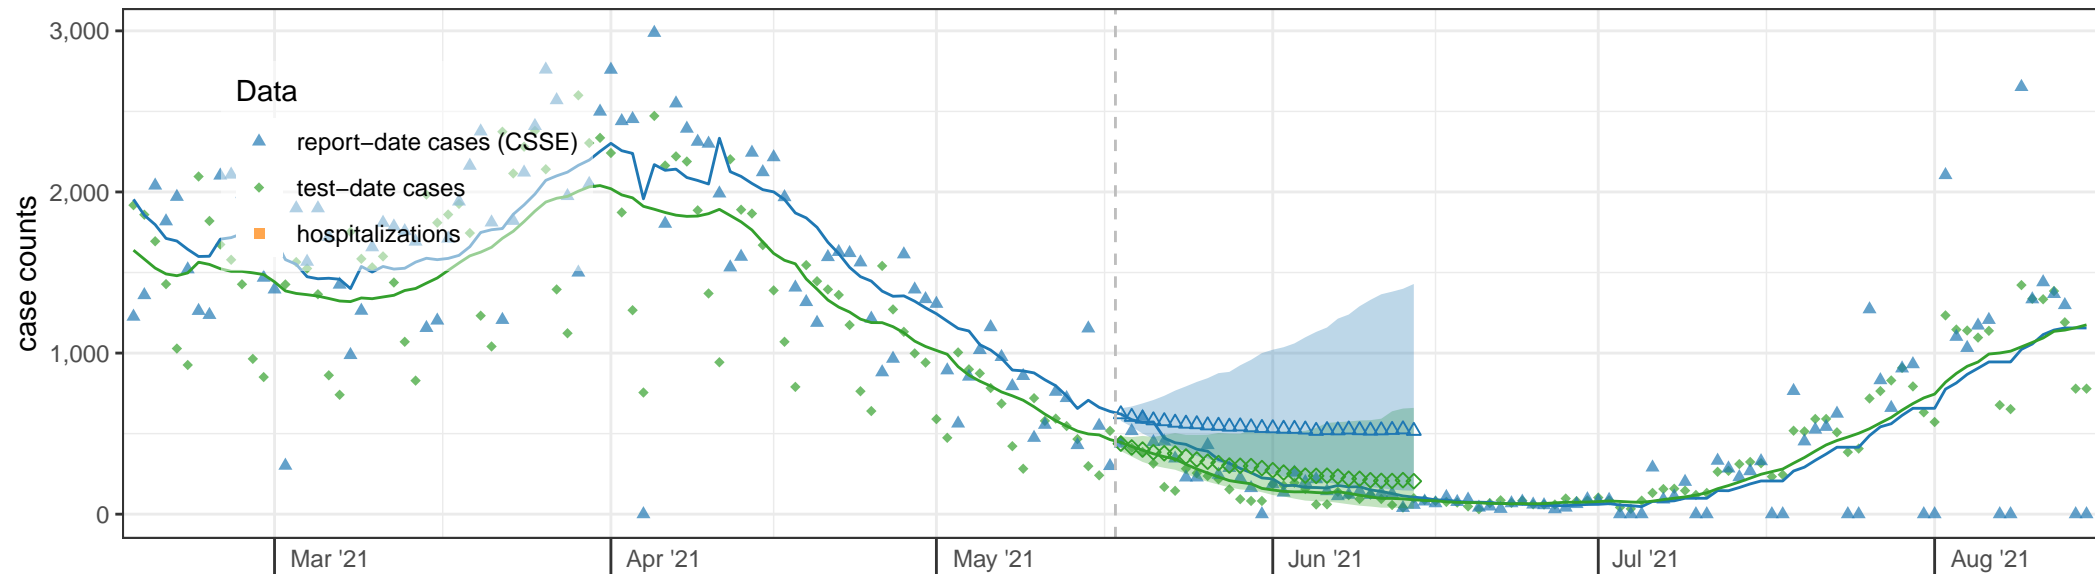

Massachusetts hospitalization data and forecasts: 2021-05-17

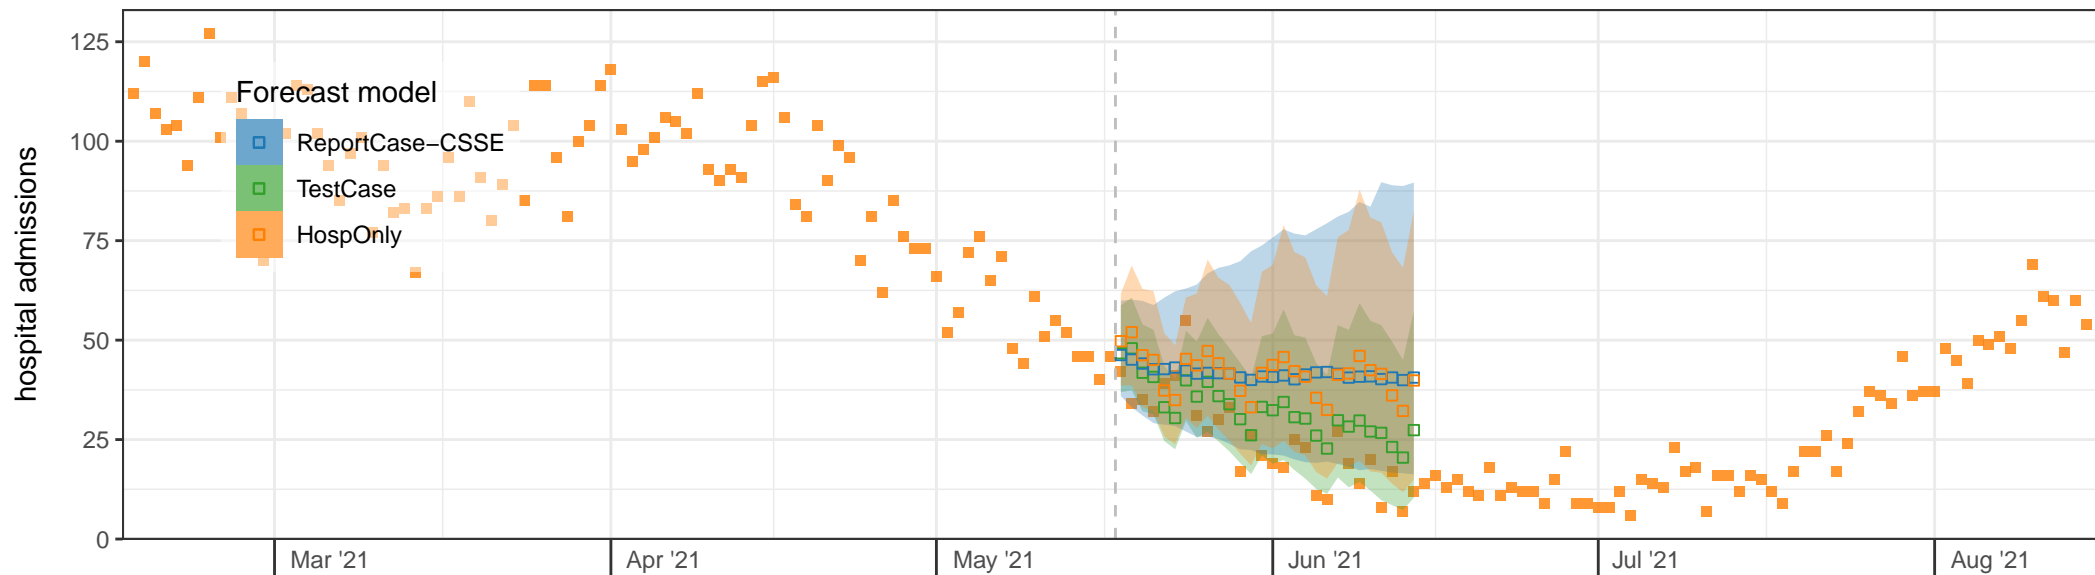

Massachusetts case data and forecasts: 2021-05-24

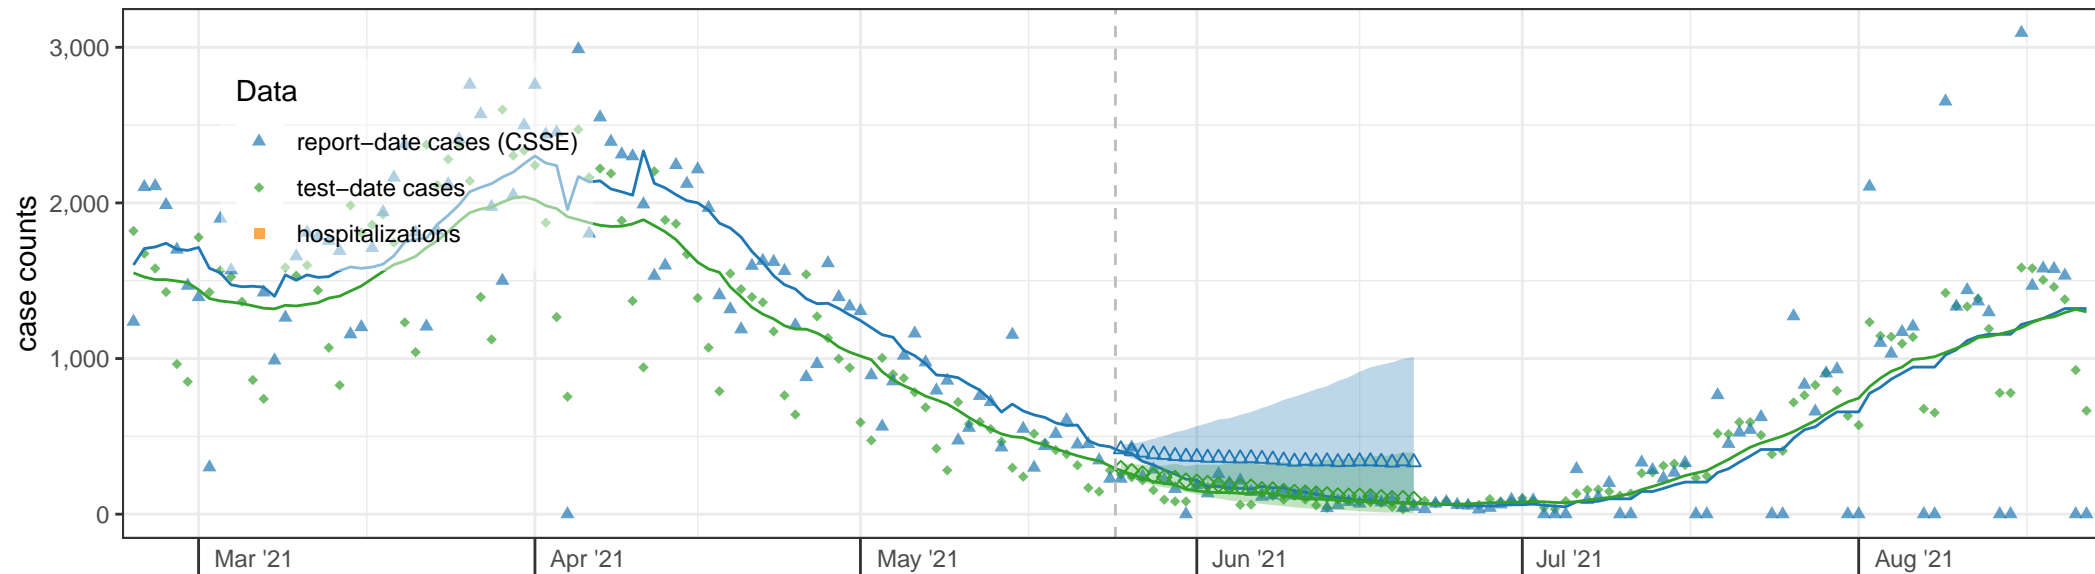

Massachusetts hospitalization data and forecasts: 2021-05-24

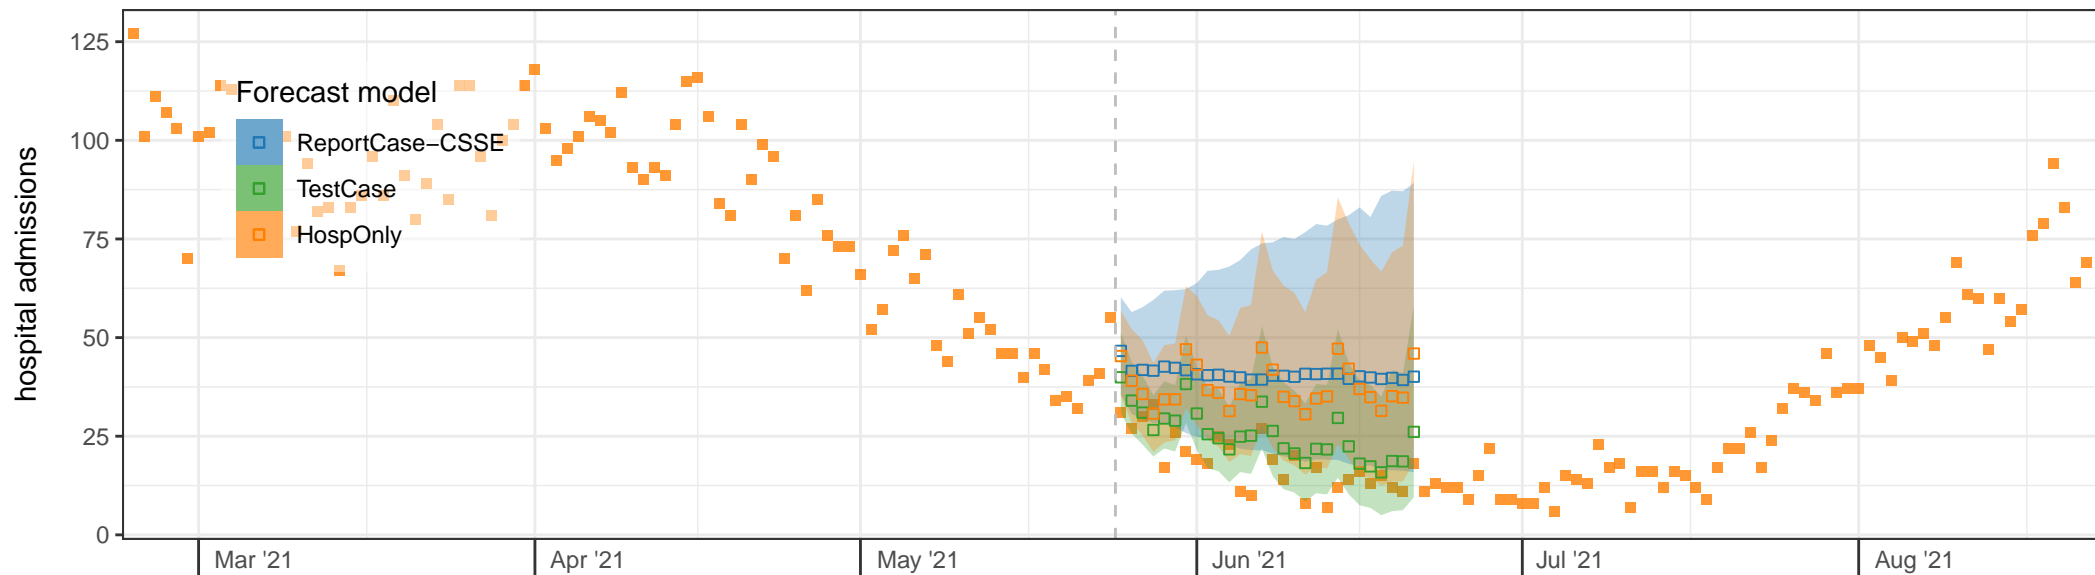

Massachusetts case data and forecasts: 2021-05-31

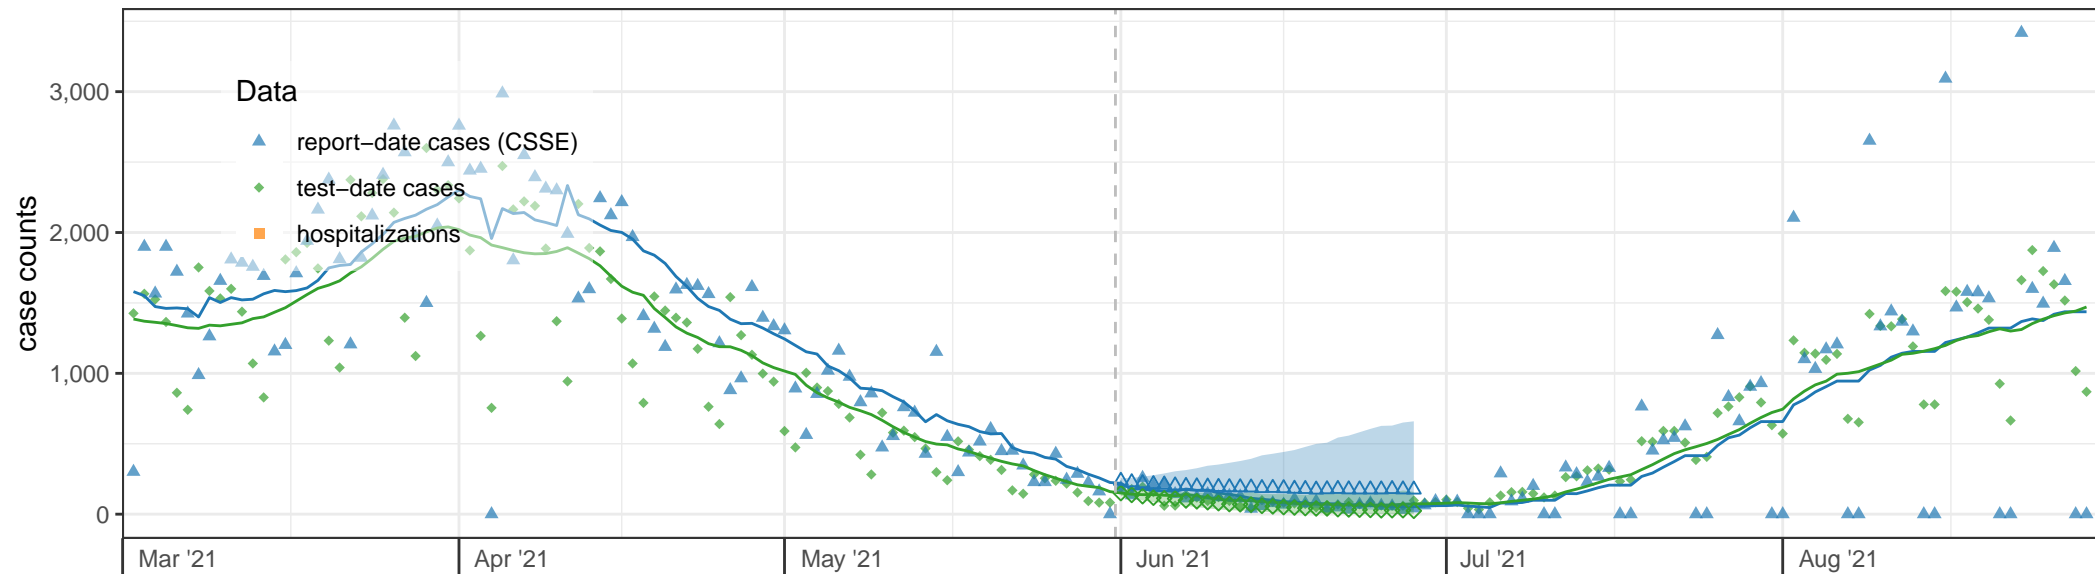

Massachusetts hospitalization data and forecasts: 2021-05-31

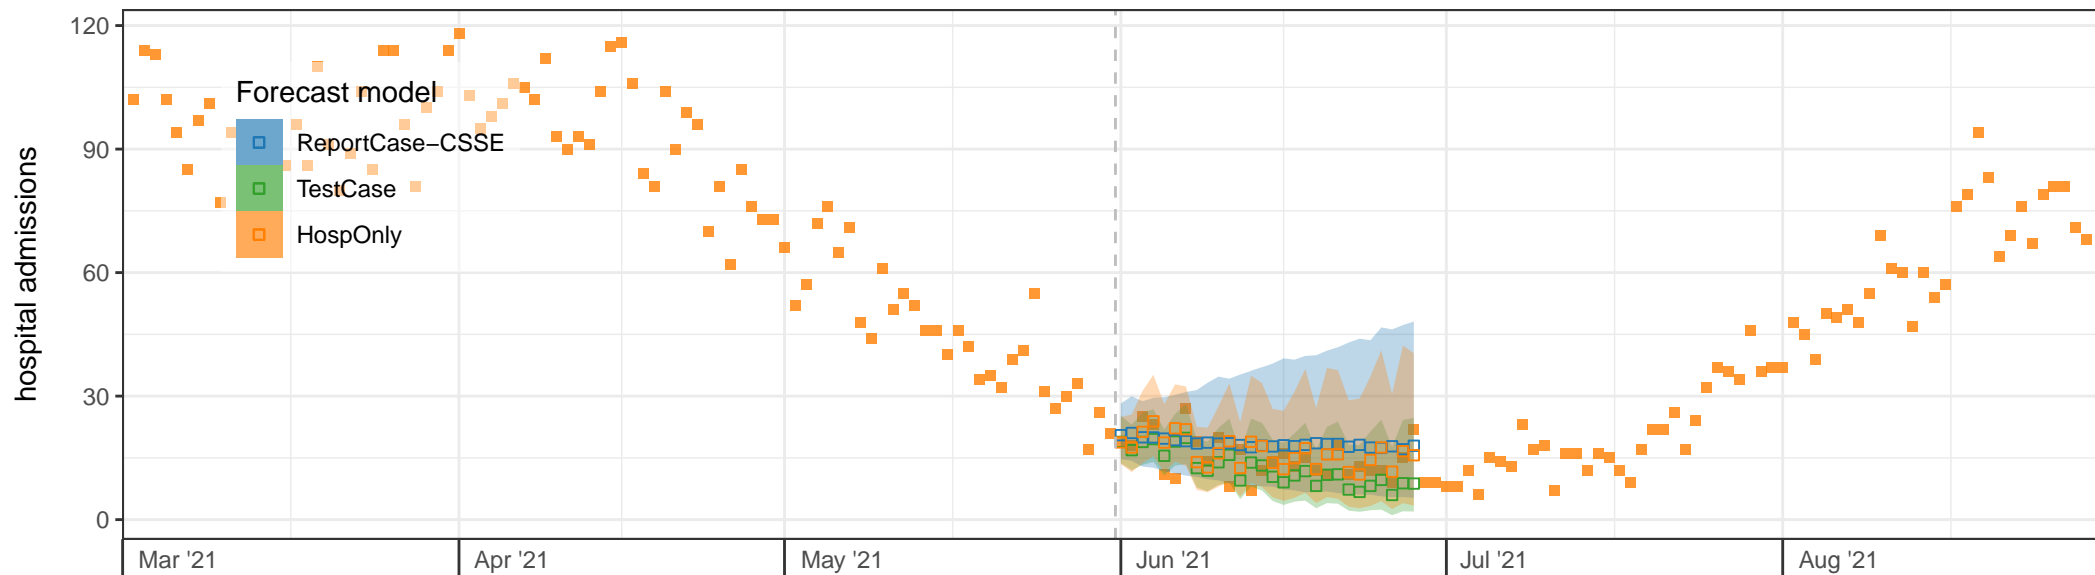



Massachusetts case data and forecasts: 2021-06-07

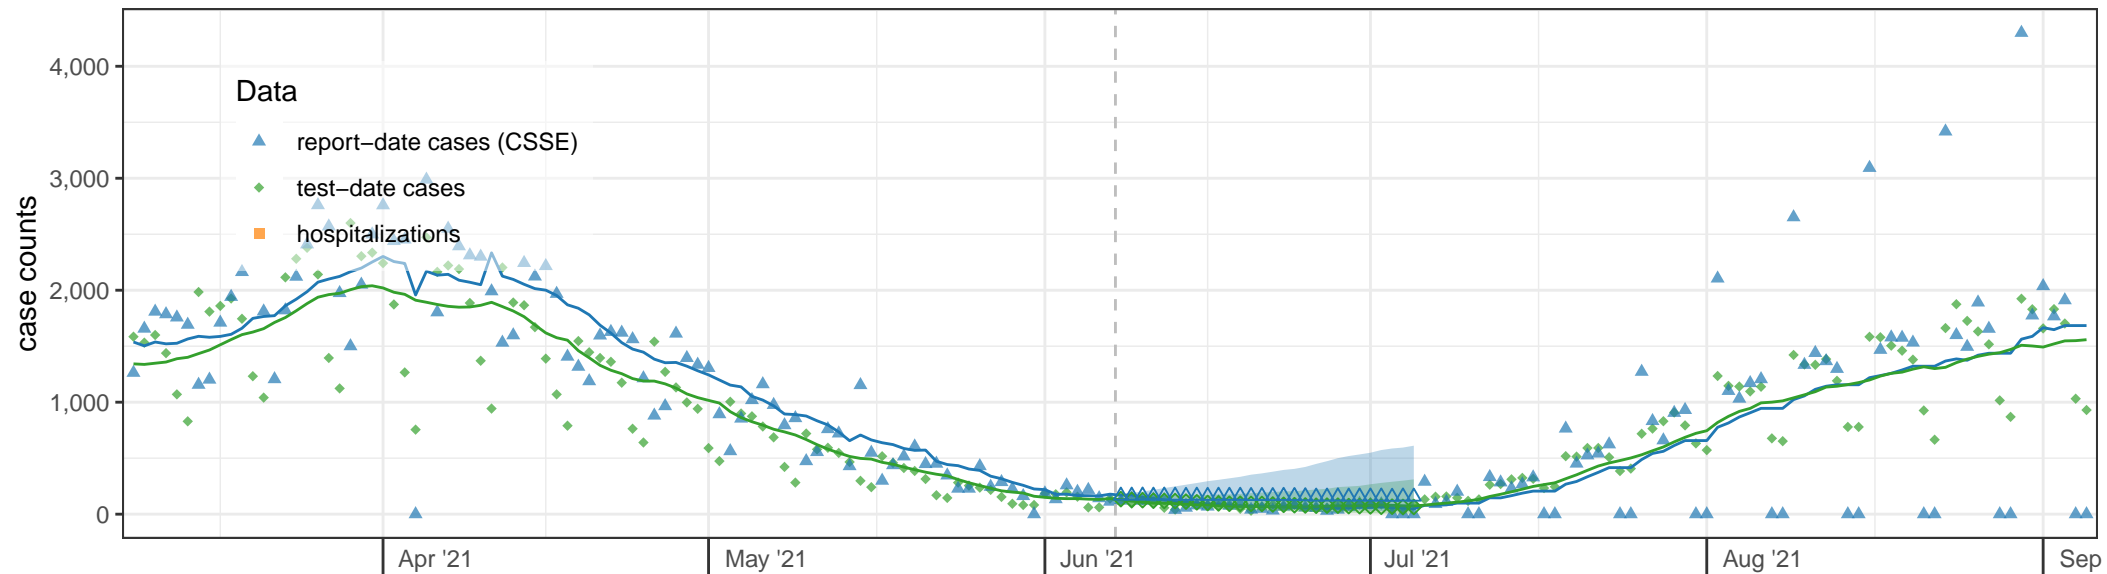

Massachusetts hospitalization data and forecasts: 2021-06-07

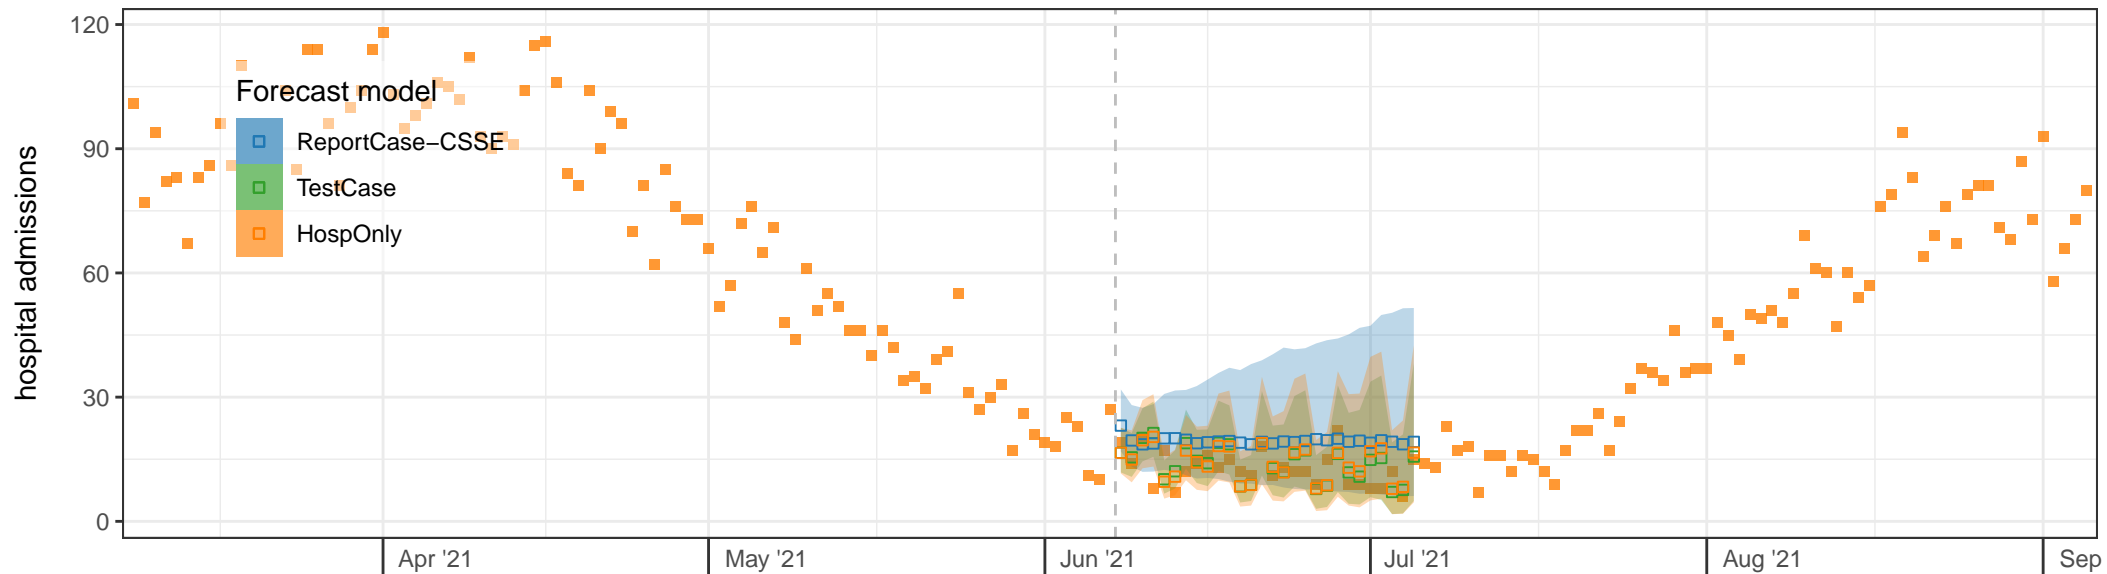

Massachusetts case data and forecasts: 2021-06-14

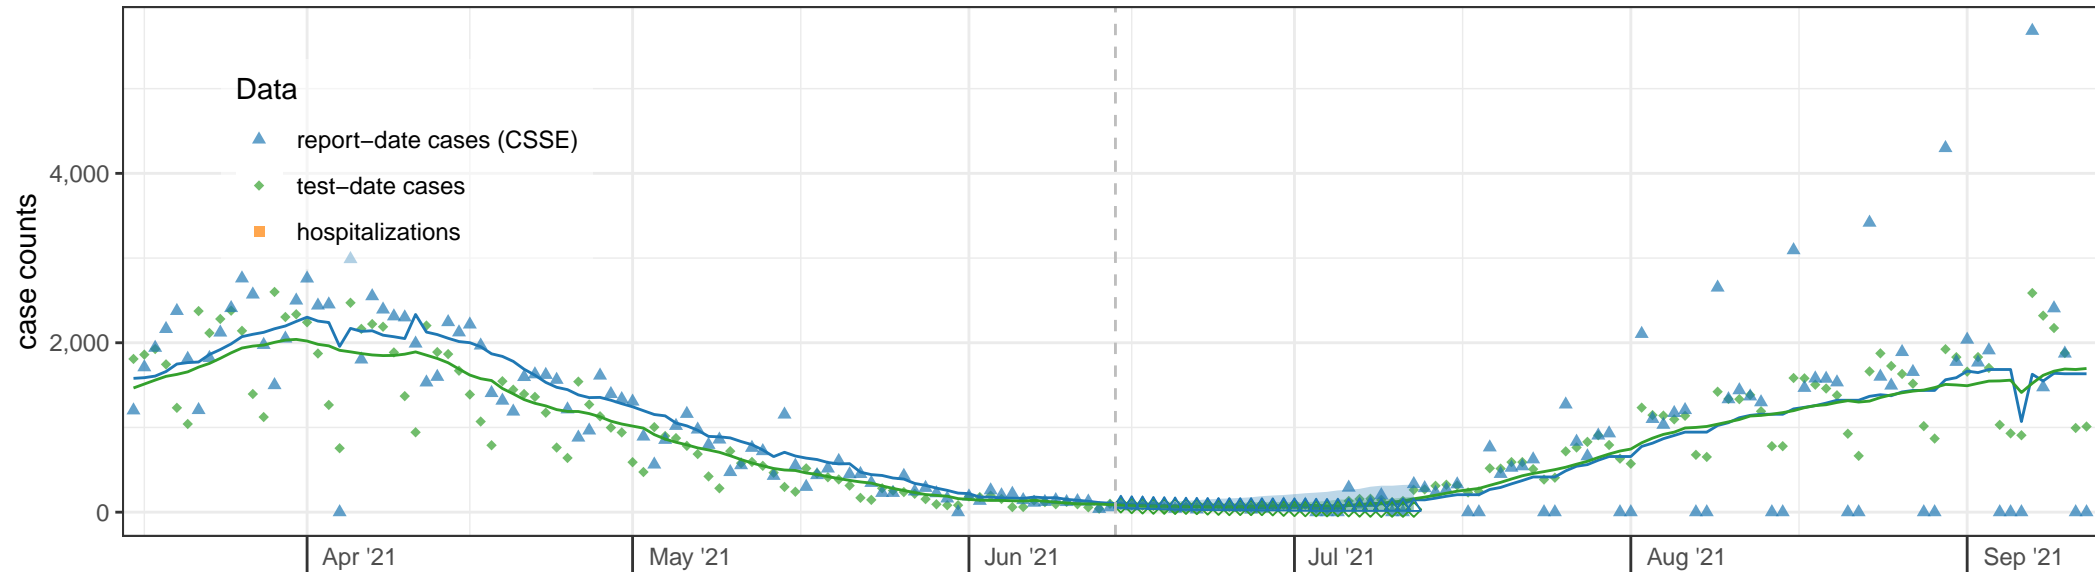

Massachusetts hospitalization data and forecasts: 2021-06-14

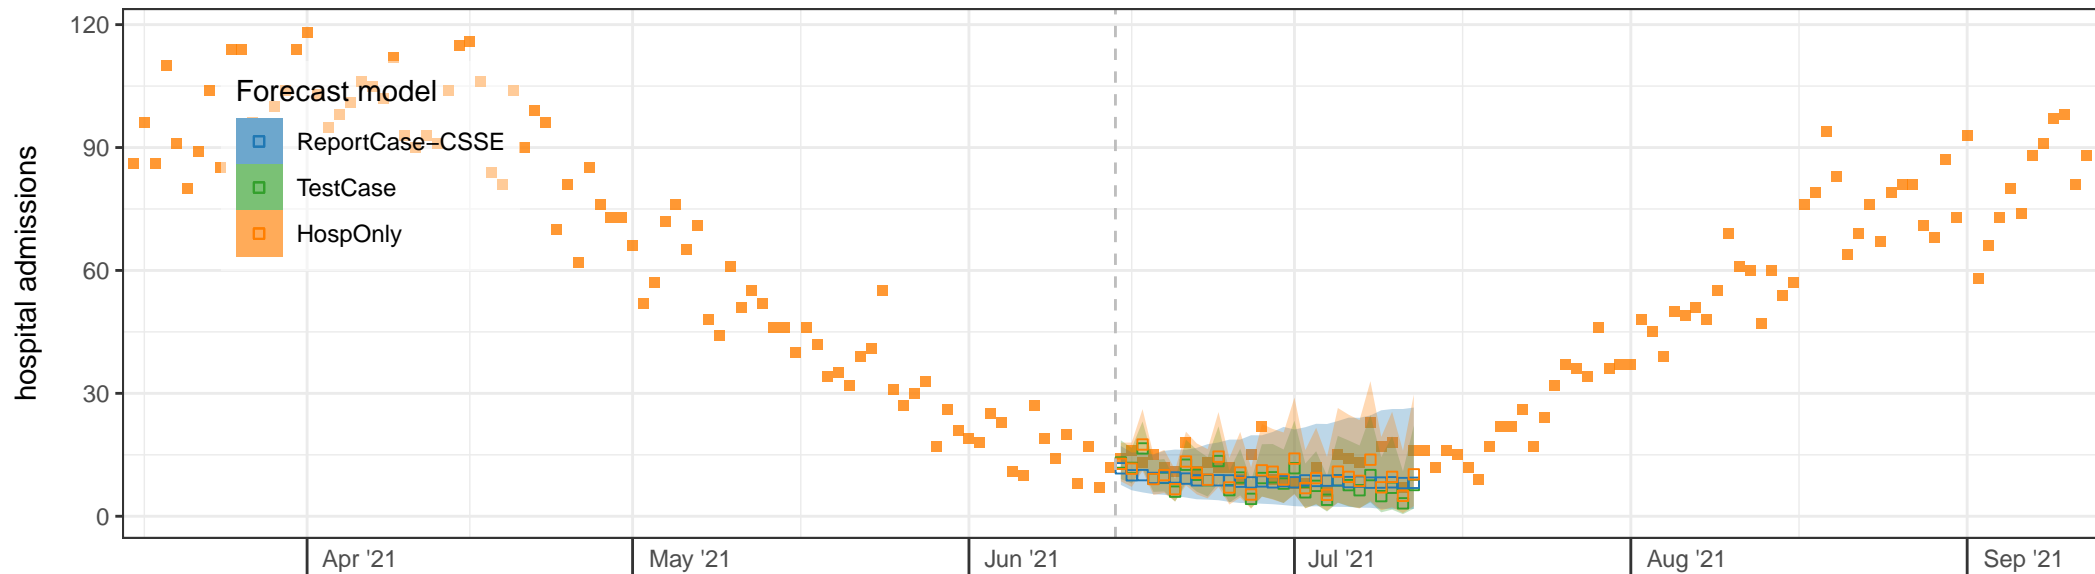

Massachusetts case data and forecasts: 2021-06-21

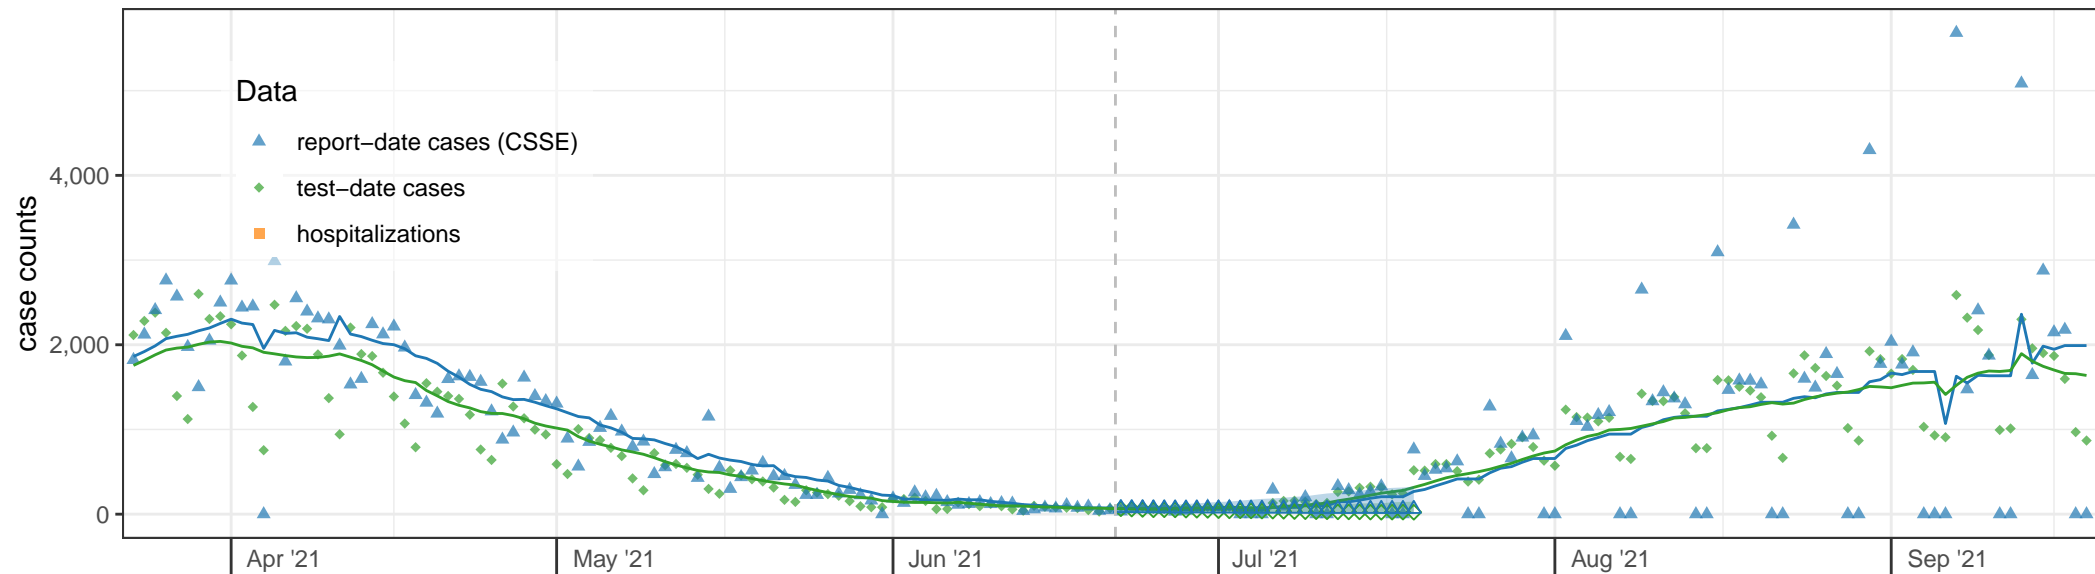

Massachusetts hospitalization data and forecasts: 2021-06-21

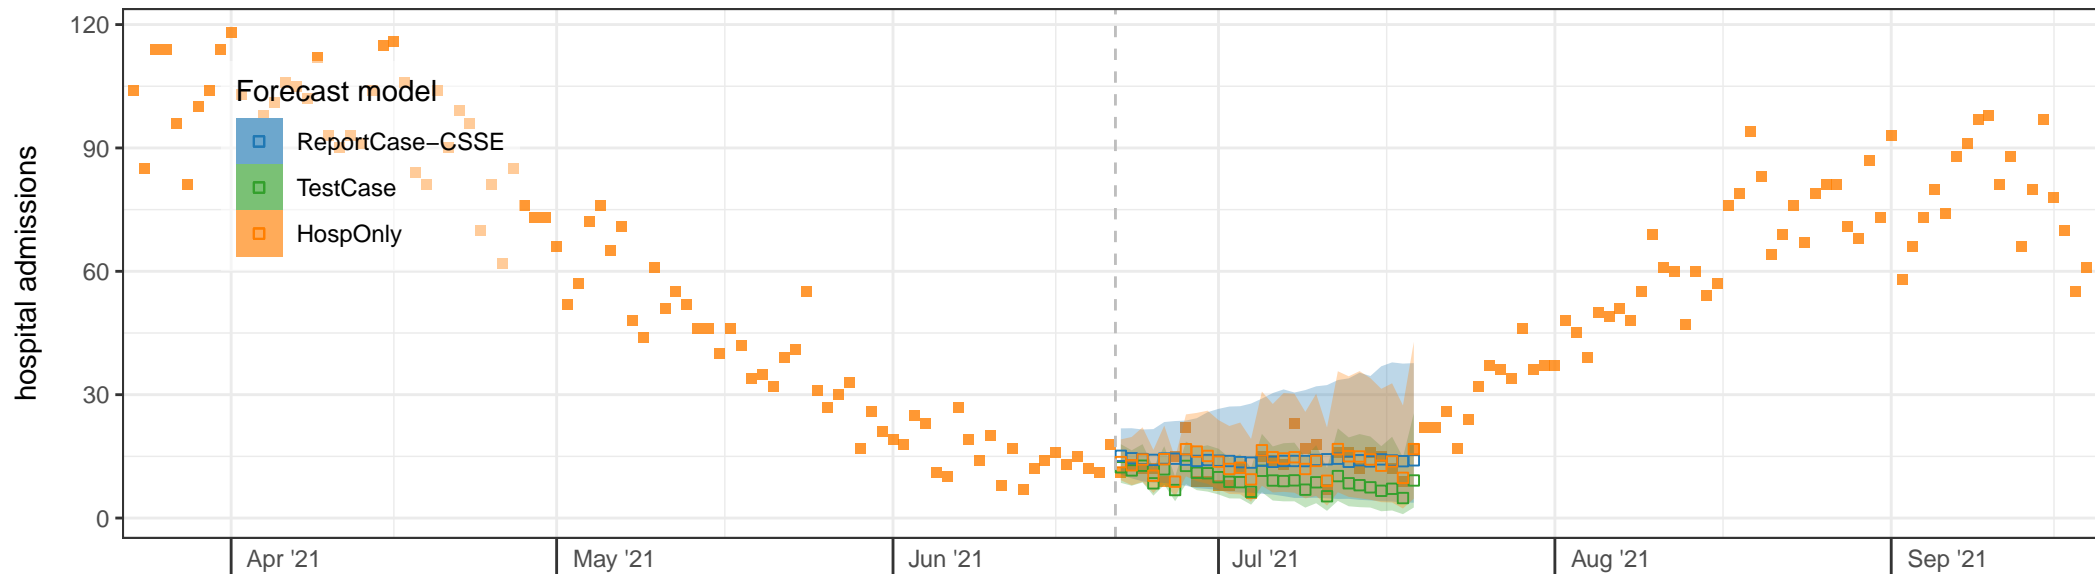

Massachusetts case data and forecasts: 2021-06-28

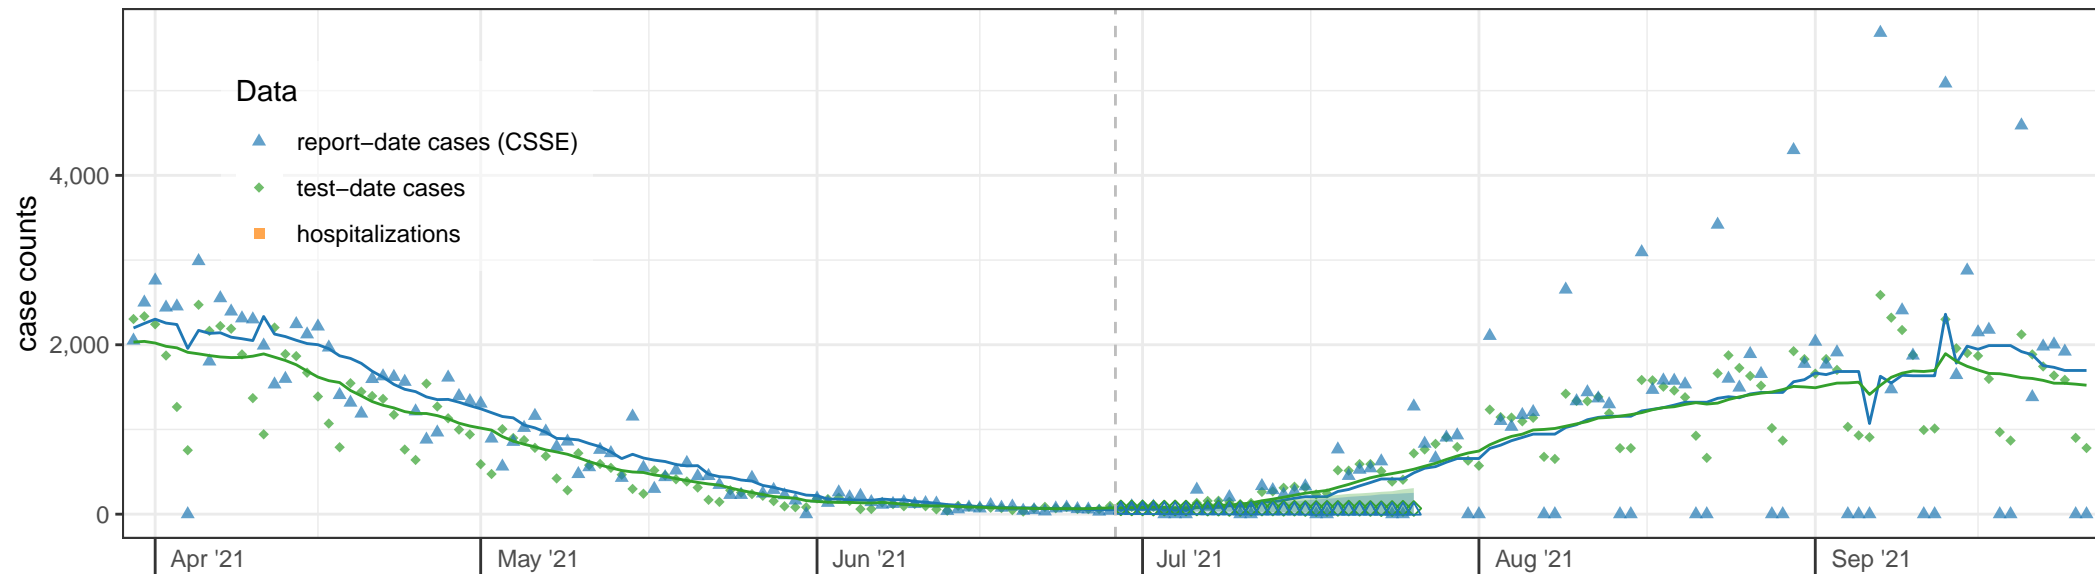

Massachusetts hospitalization data and forecasts: 2021-06-28

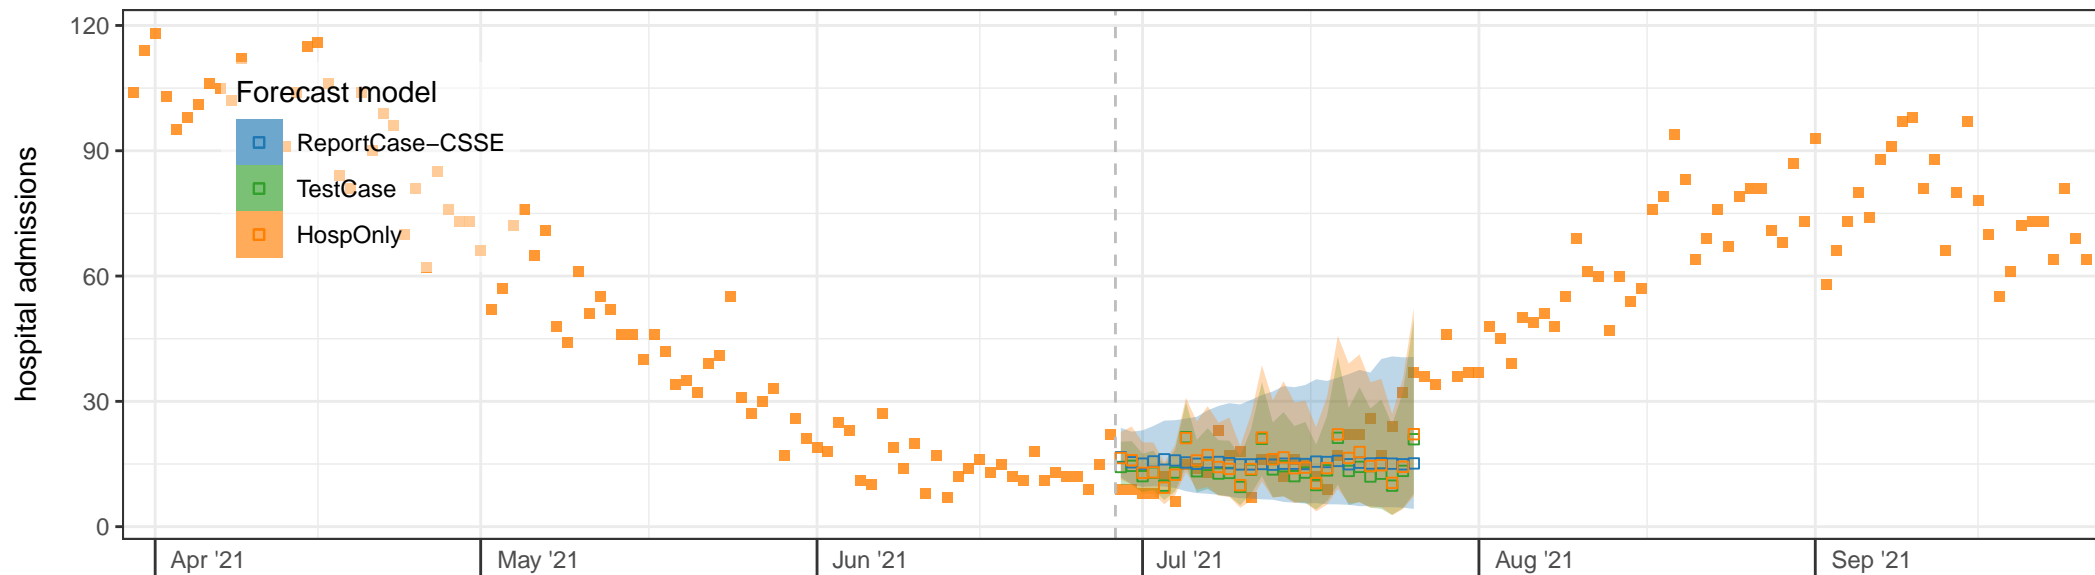

Massachusetts case data and forecasts: 2021-07-05

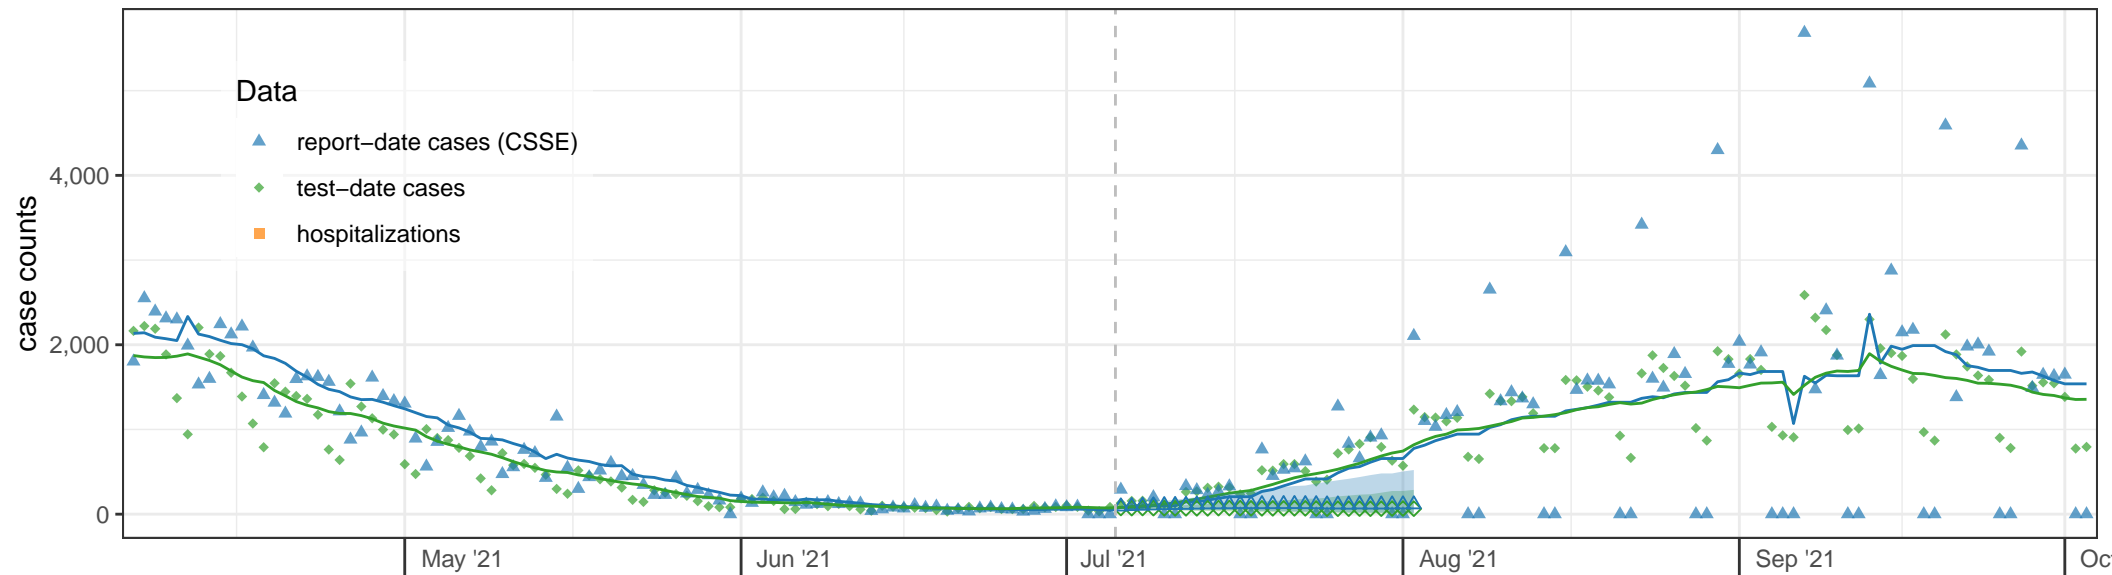

Massachusetts hospitalization data and forecasts: 2021-07-05

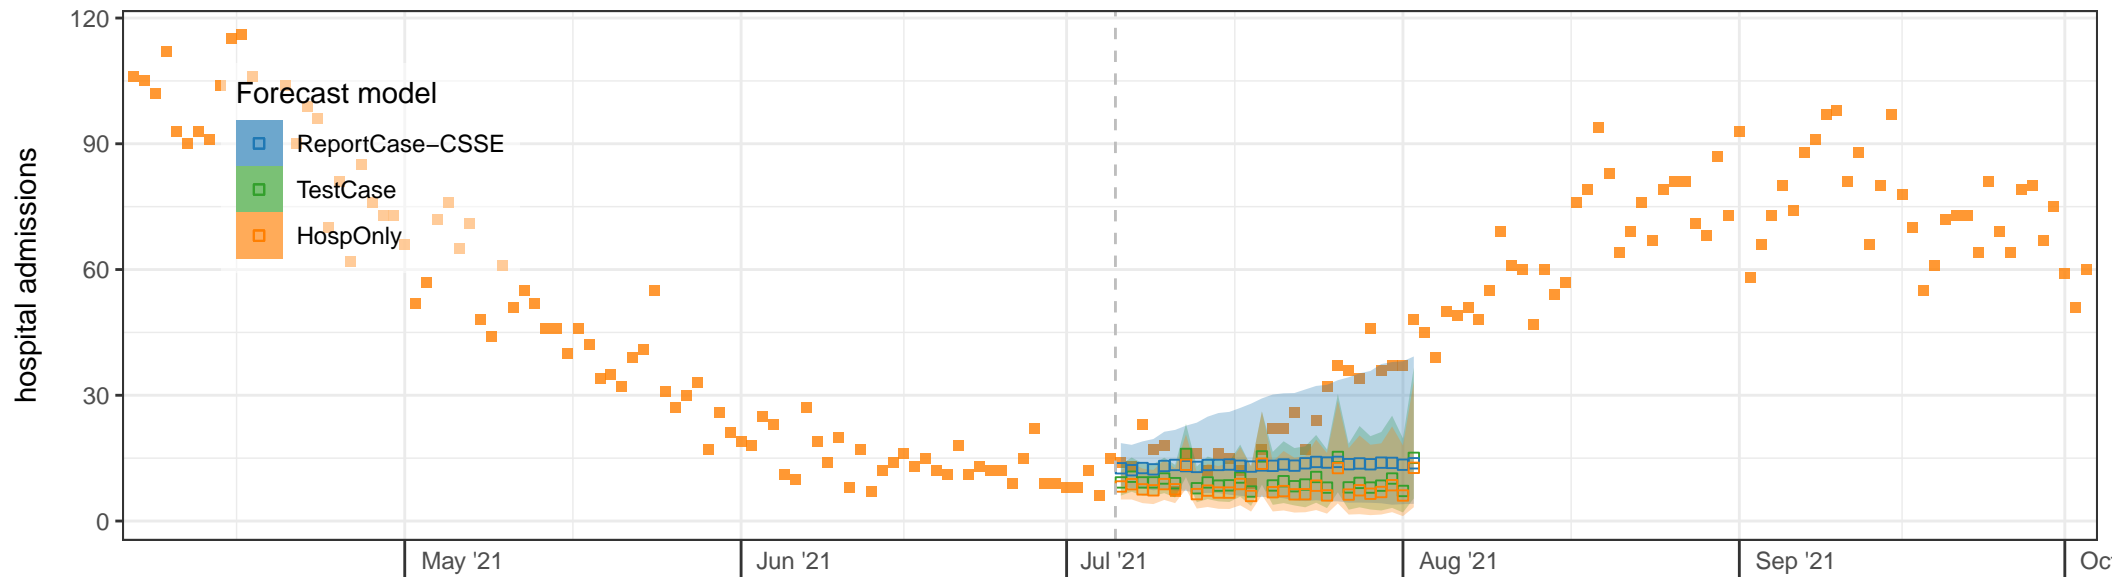

Massachusetts case data and forecasts: 2021-07-12

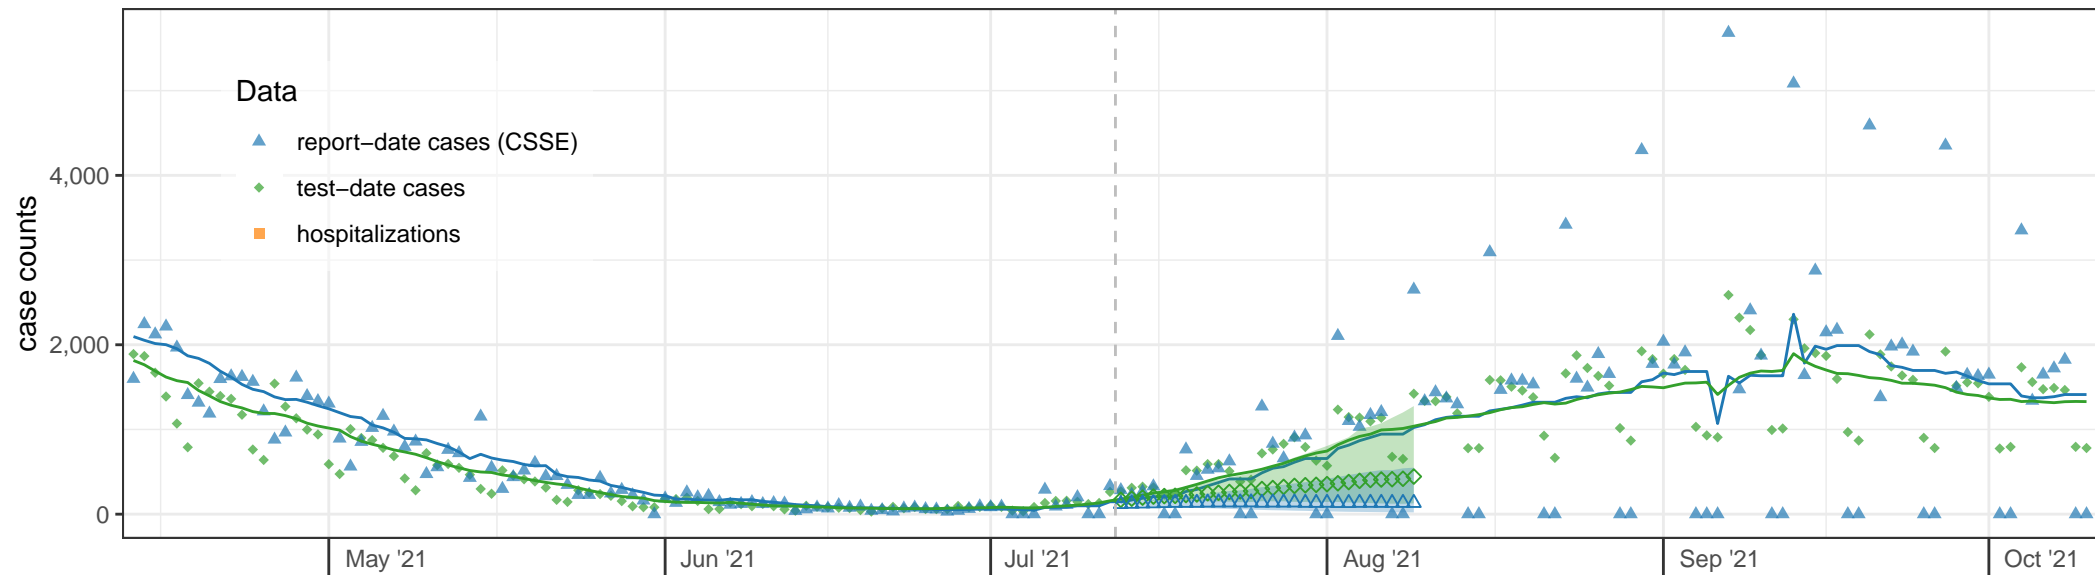

Massachusetts hospitalization data and forecasts: 2021-07-12

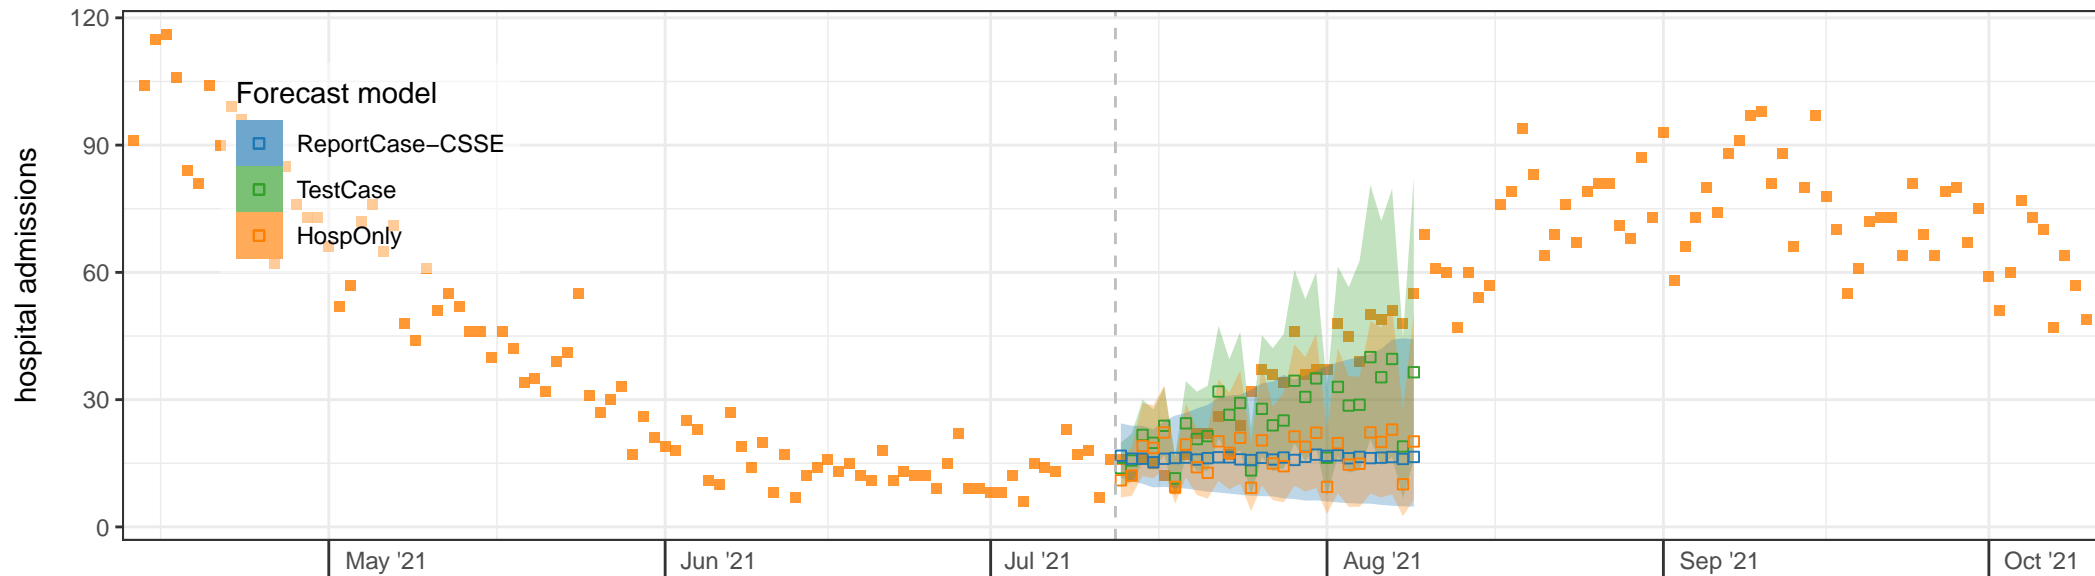

Massachusetts case data and forecasts: 2021-07-19

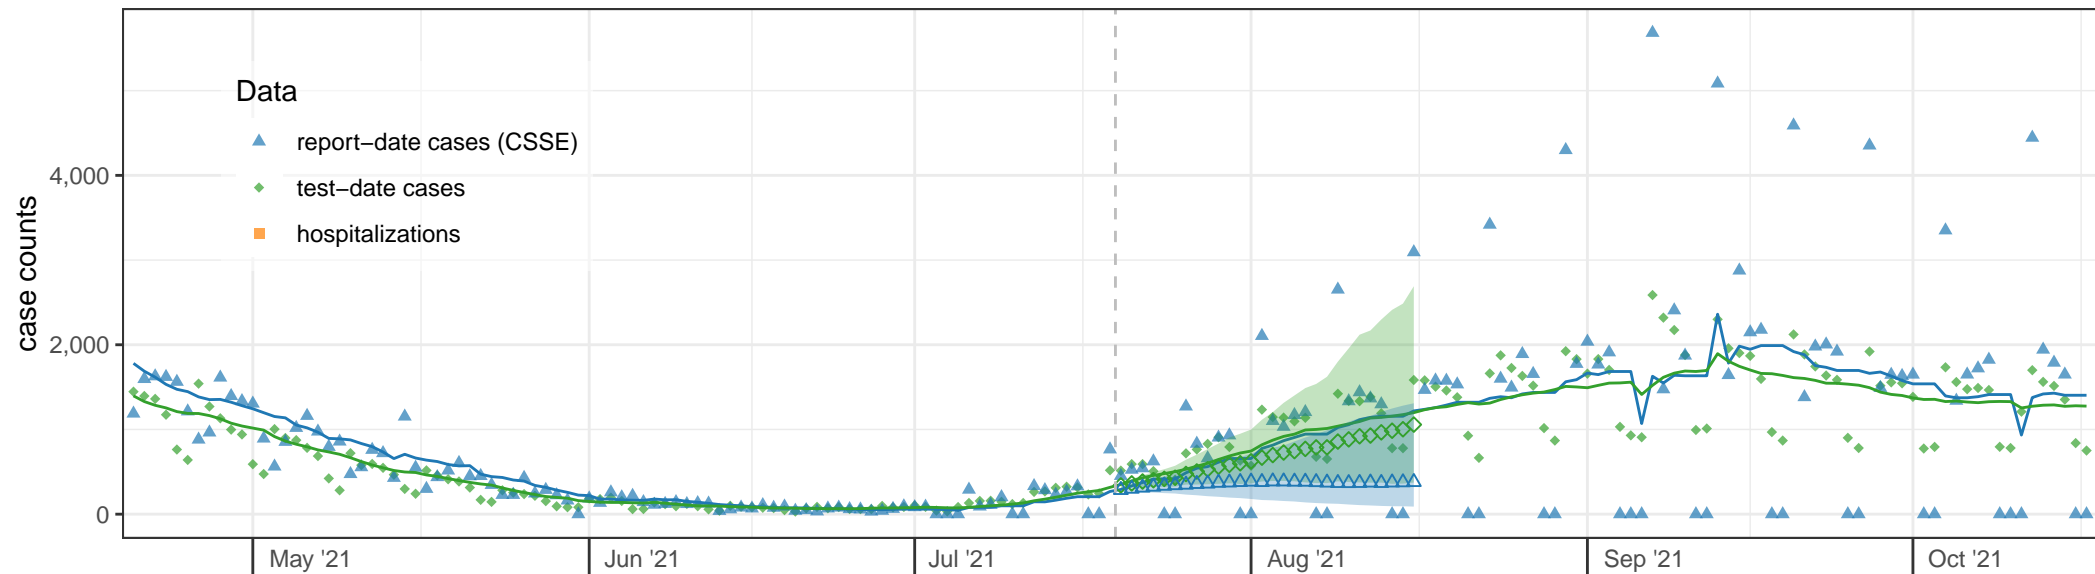

Massachusetts hospitalization data and forecasts: 2021-07-19

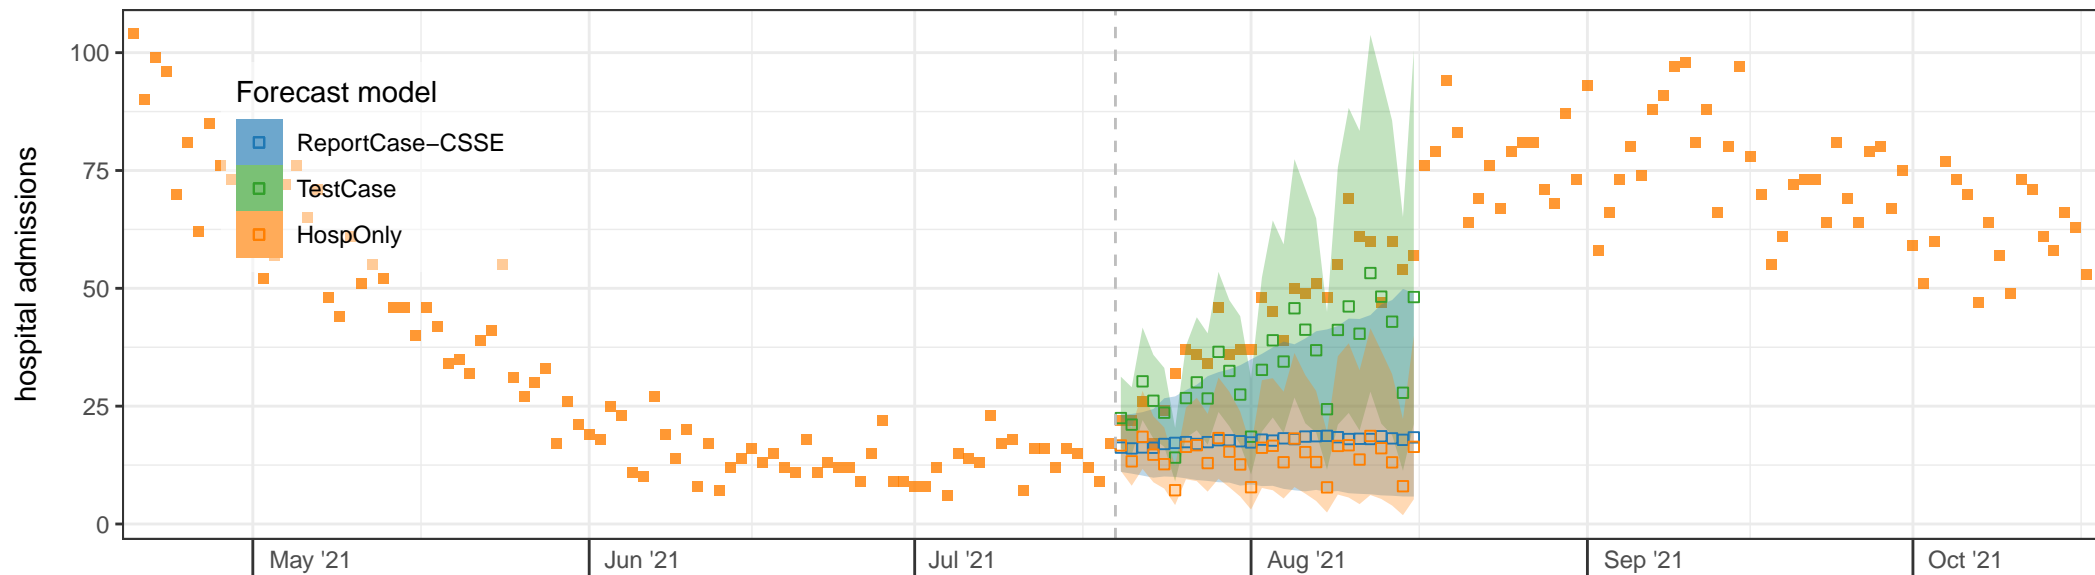

Massachusetts case data and forecasts: 2021-07-26

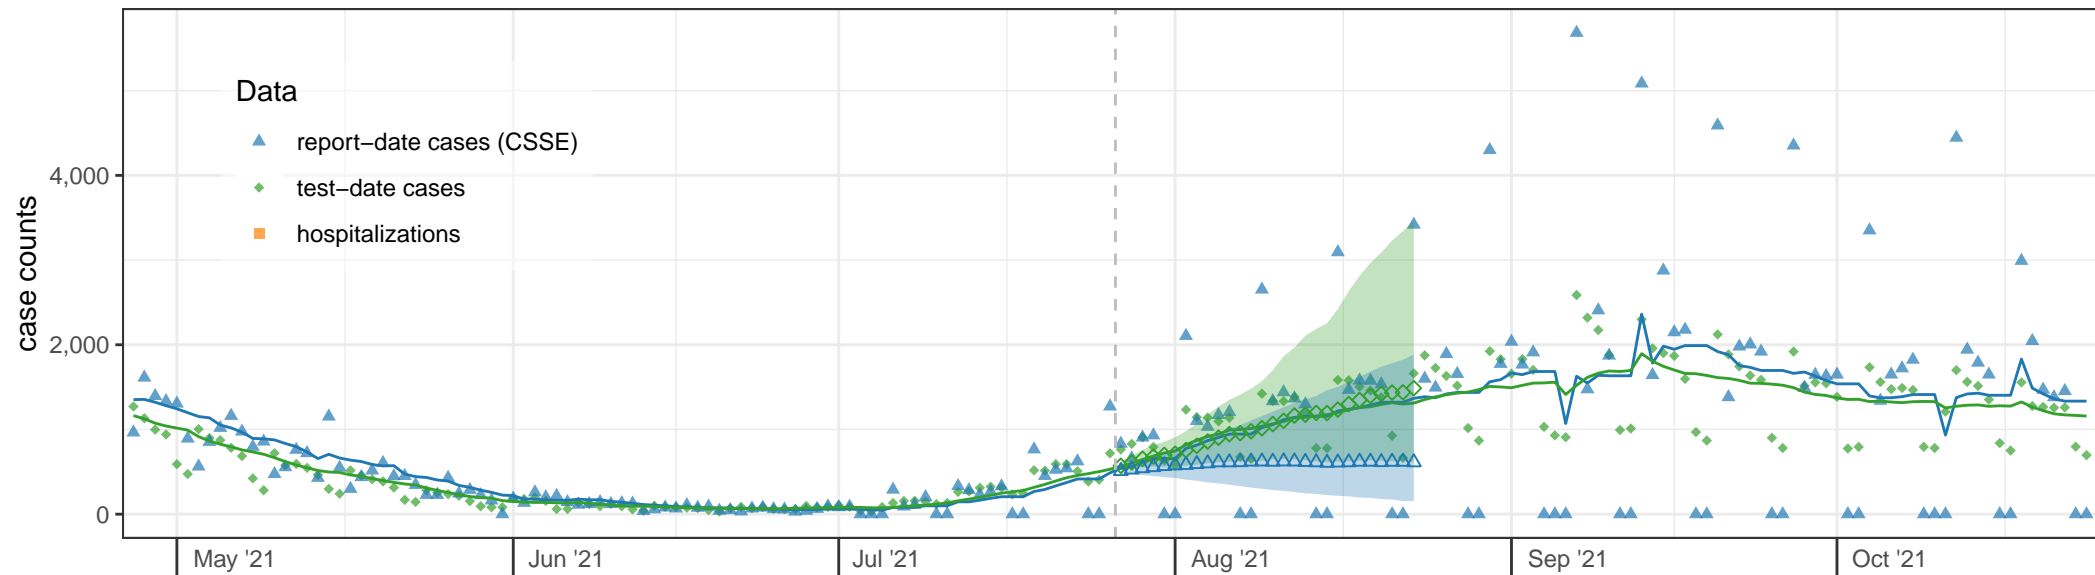

Massachusetts hospitalization data and forecasts: 2021-07-26

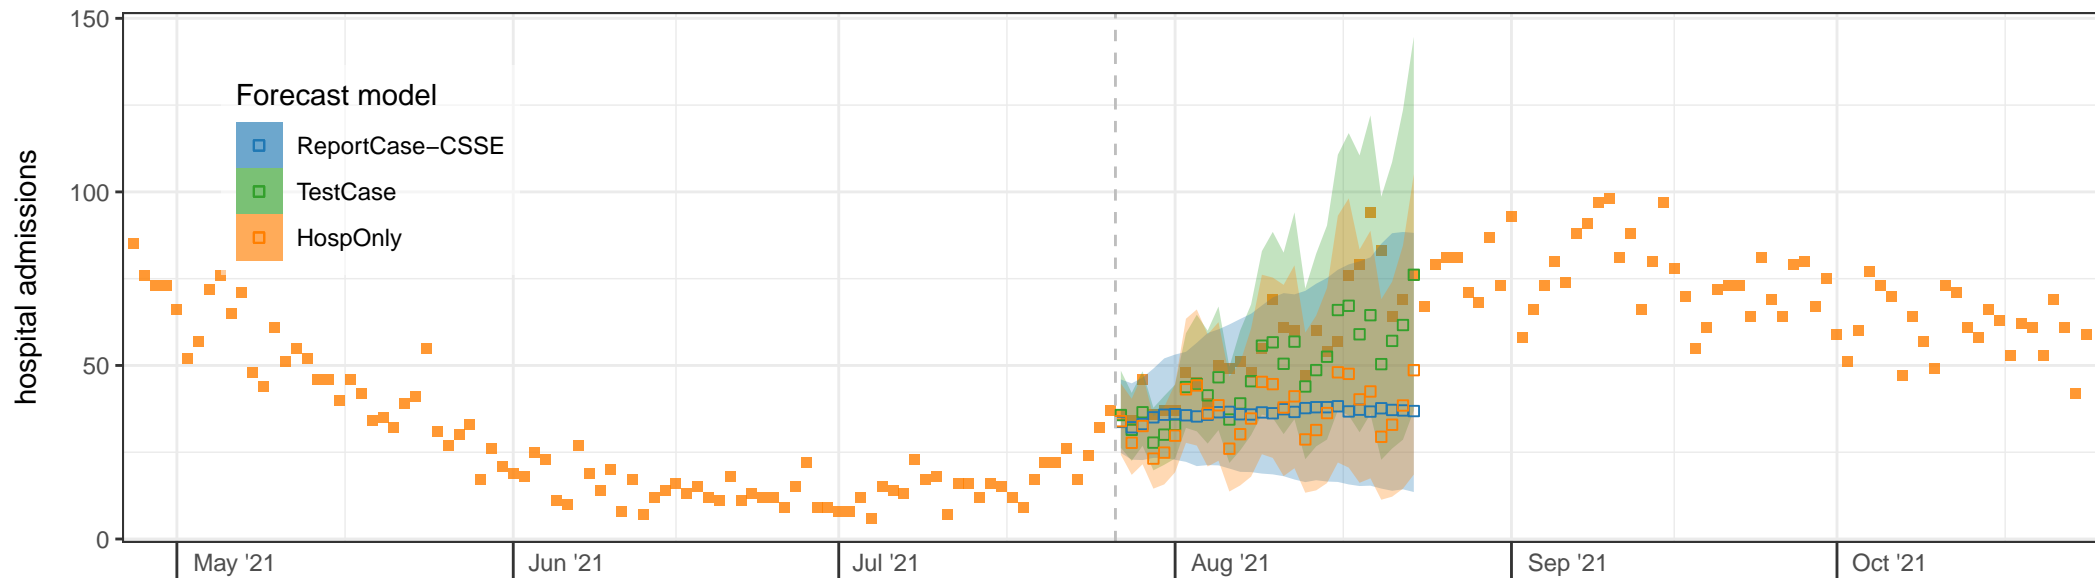



Massachusetts case data and forecasts: 2021-08-02

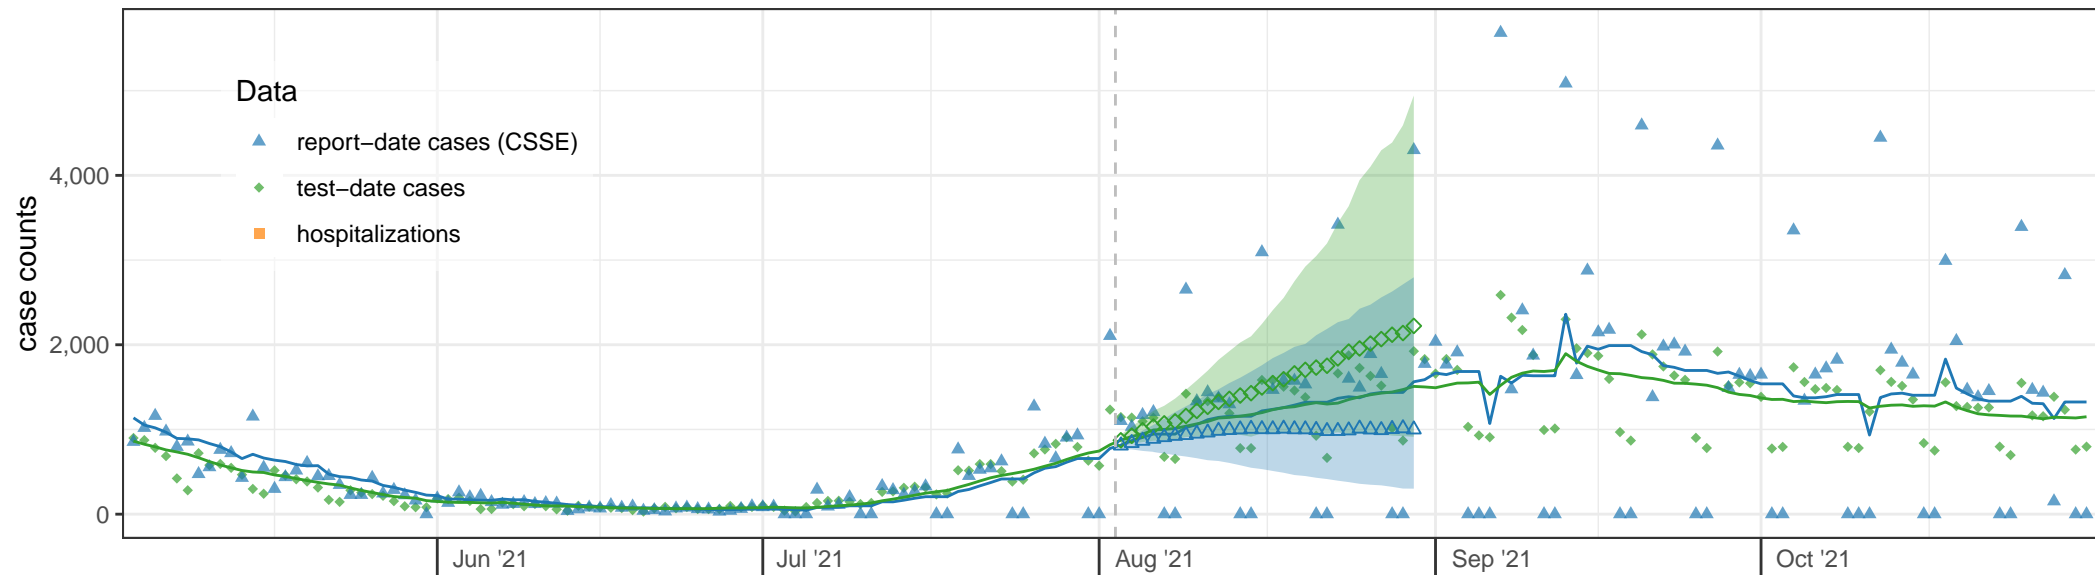

Massachusetts hospitalization data and forecasts: 2021-08-02

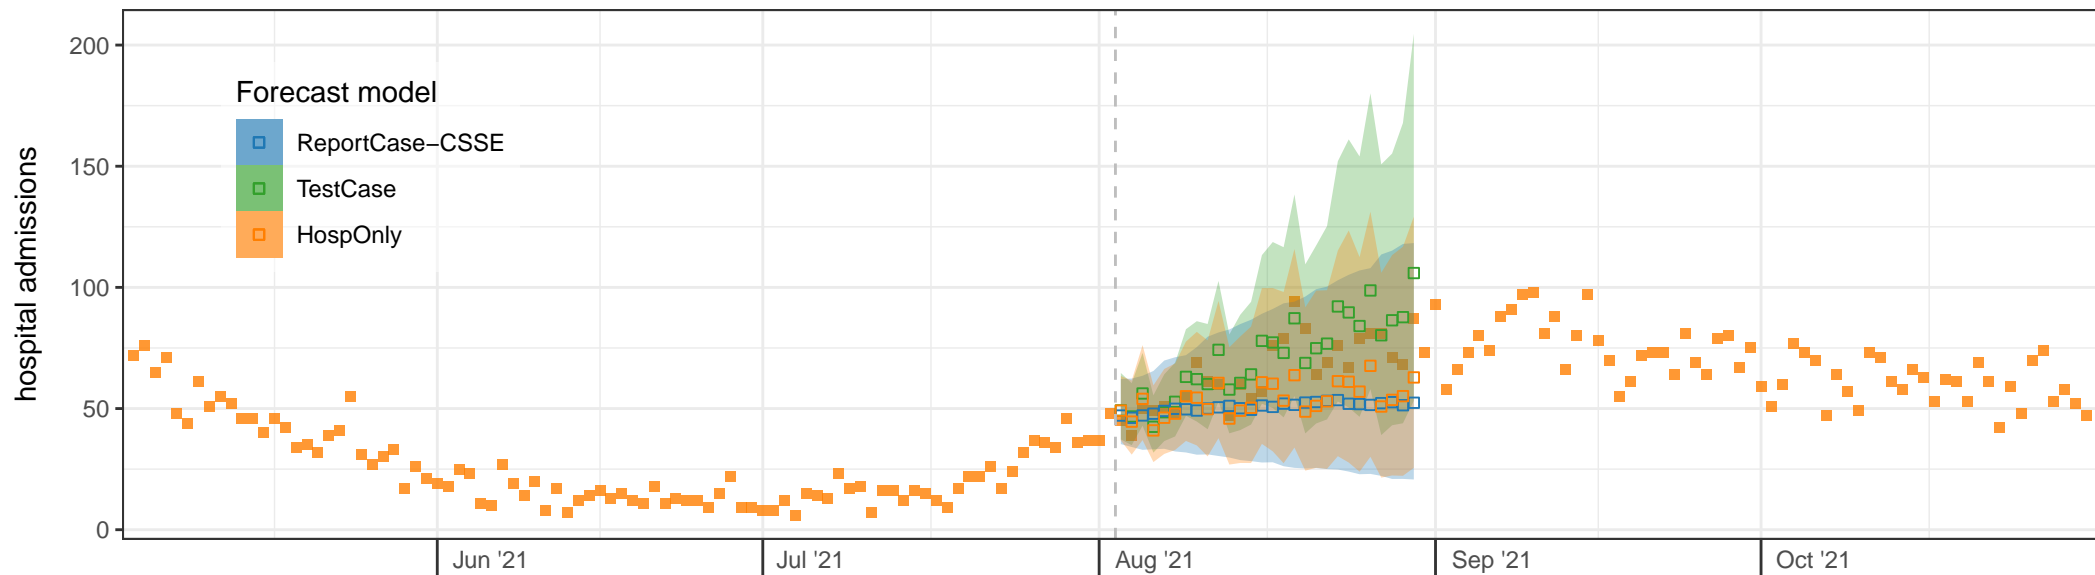

Massachusetts case data and forecasts: 2021-08-09

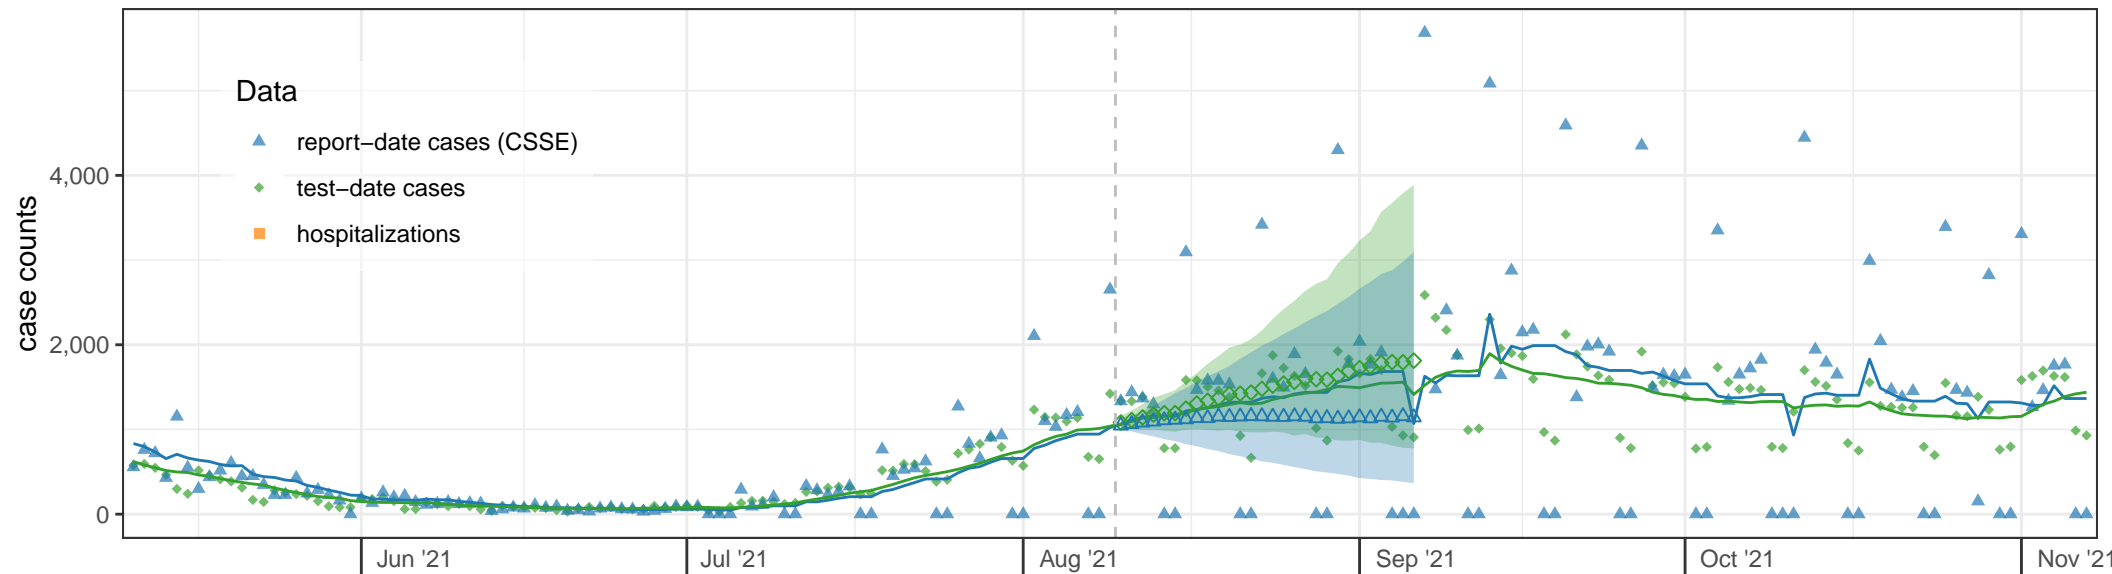

Massachusetts hospitalization data and forecasts: 2021-08-09

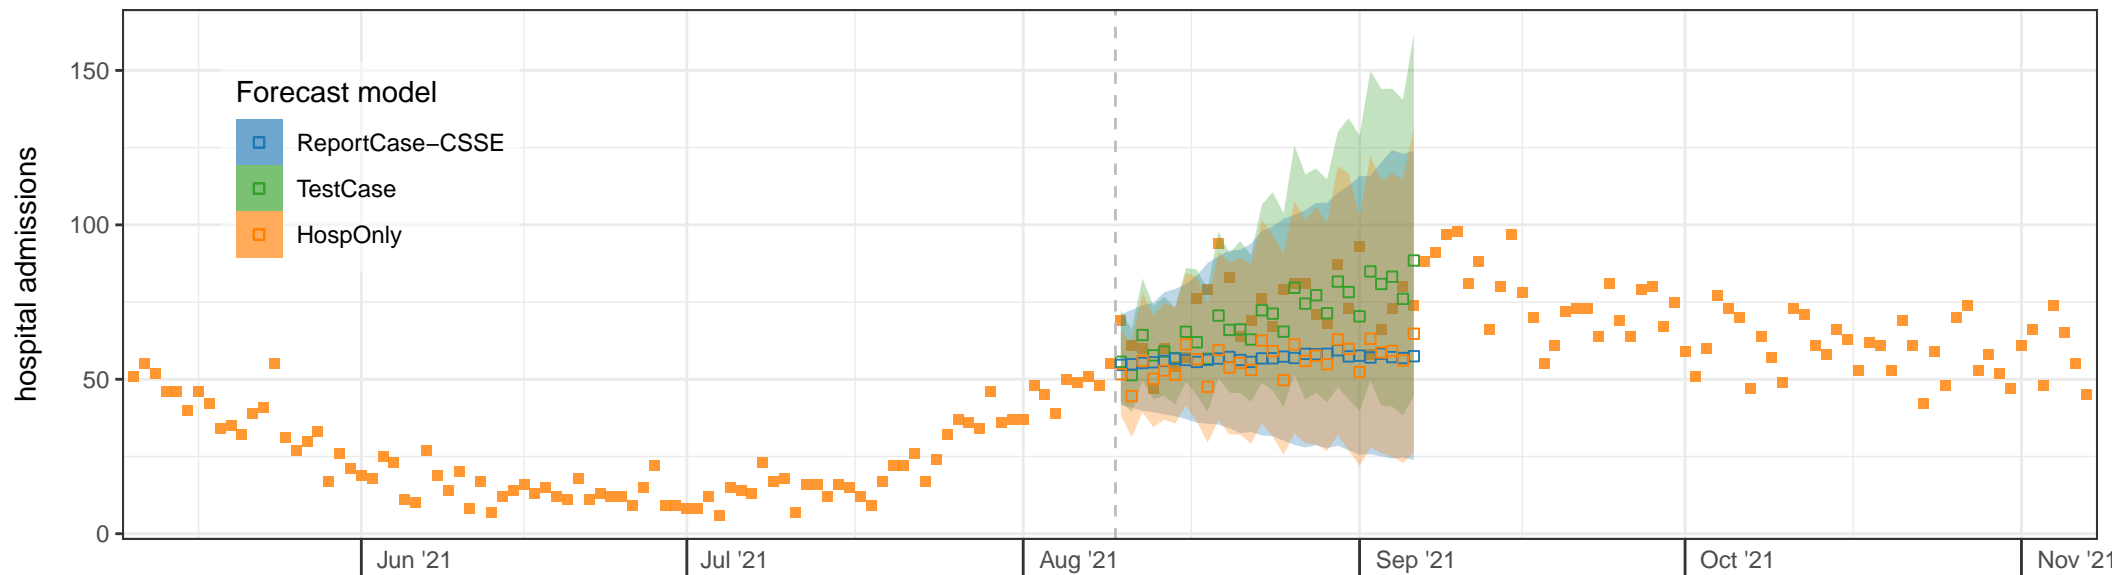

Massachusetts case data and forecasts: 2021-08-16

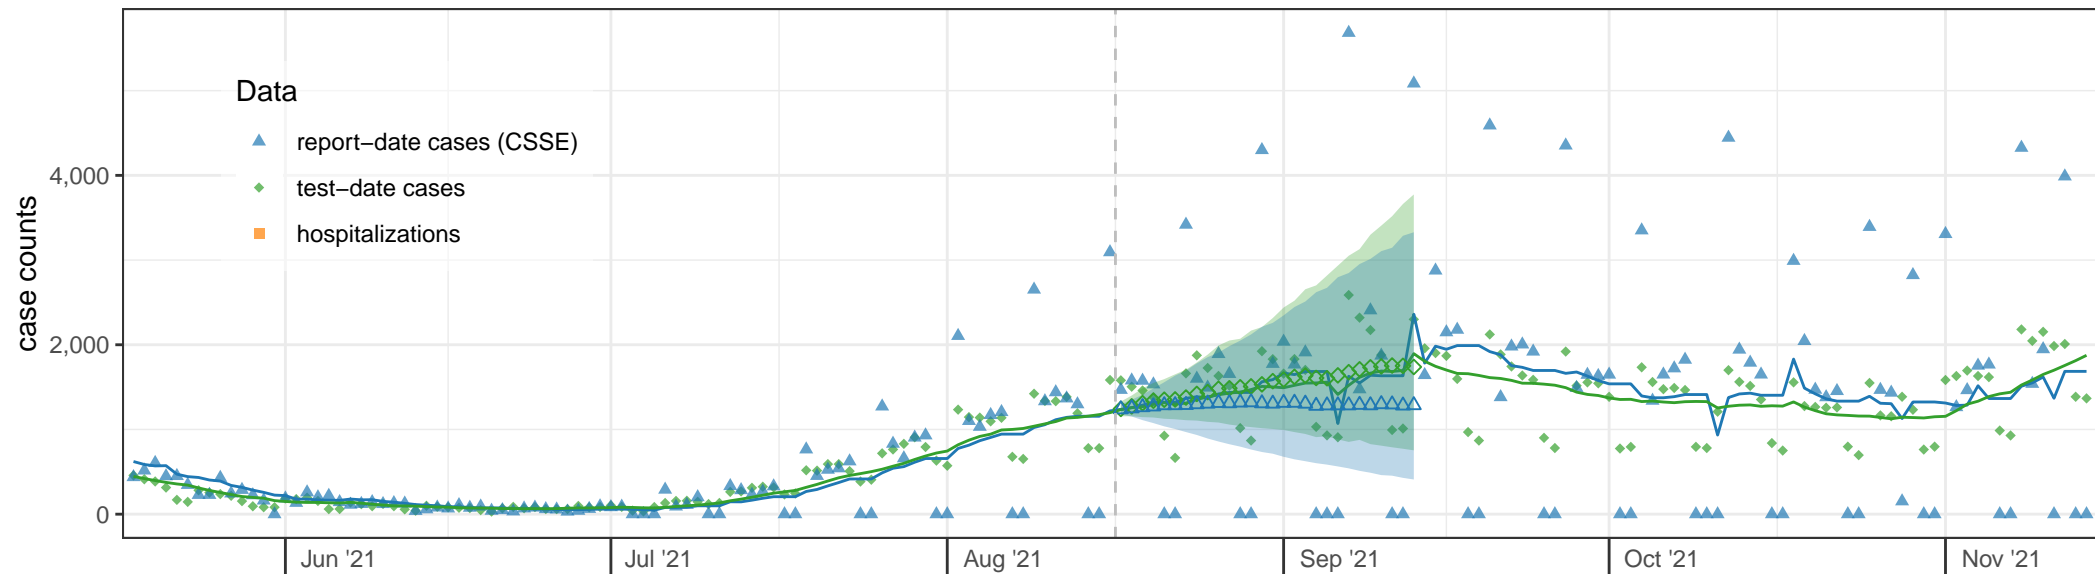

Massachusetts hospitalization data and forecasts: 2021-08-16

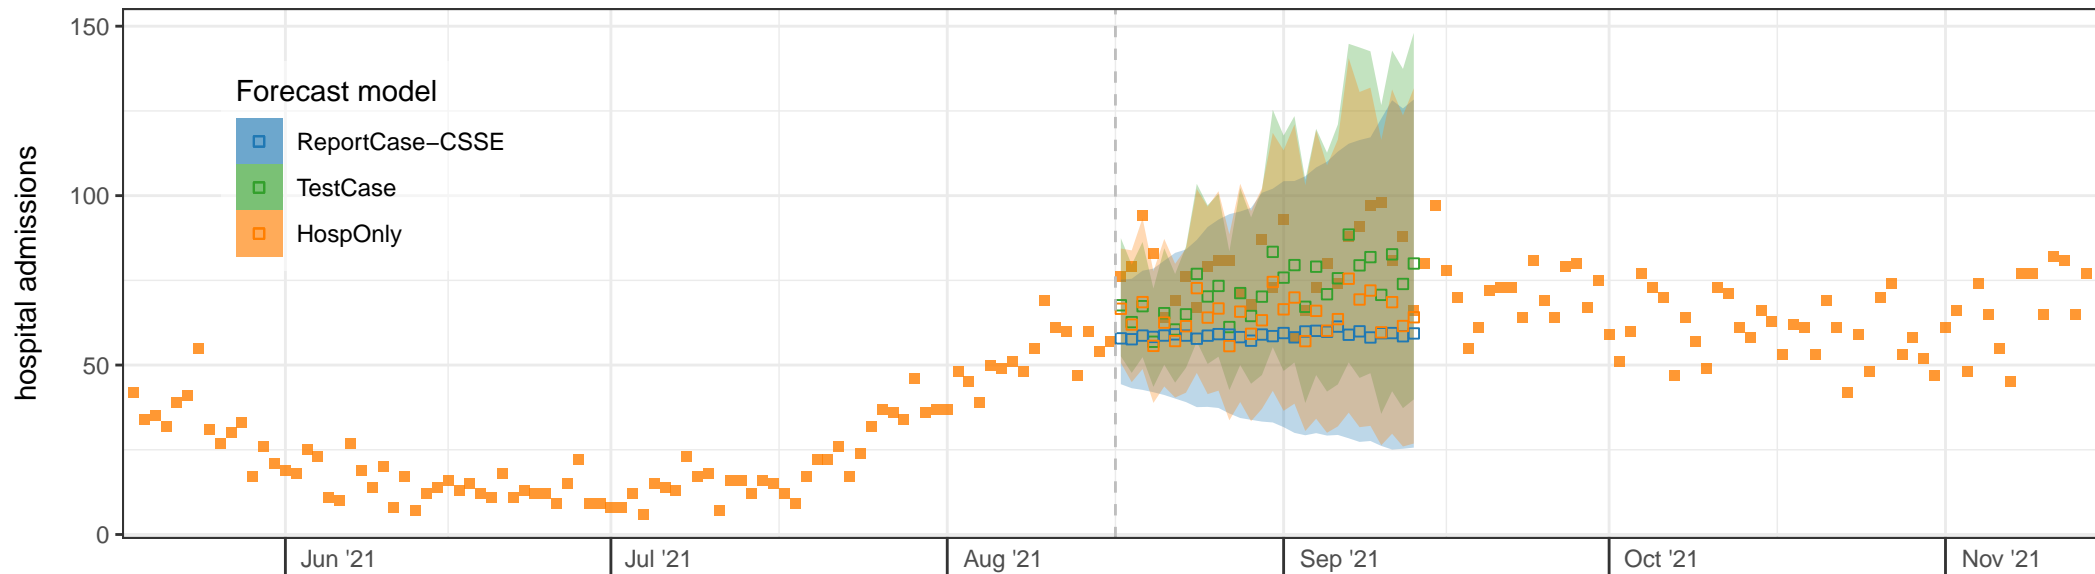

Massachusetts case data and forecasts: 2021-08-23

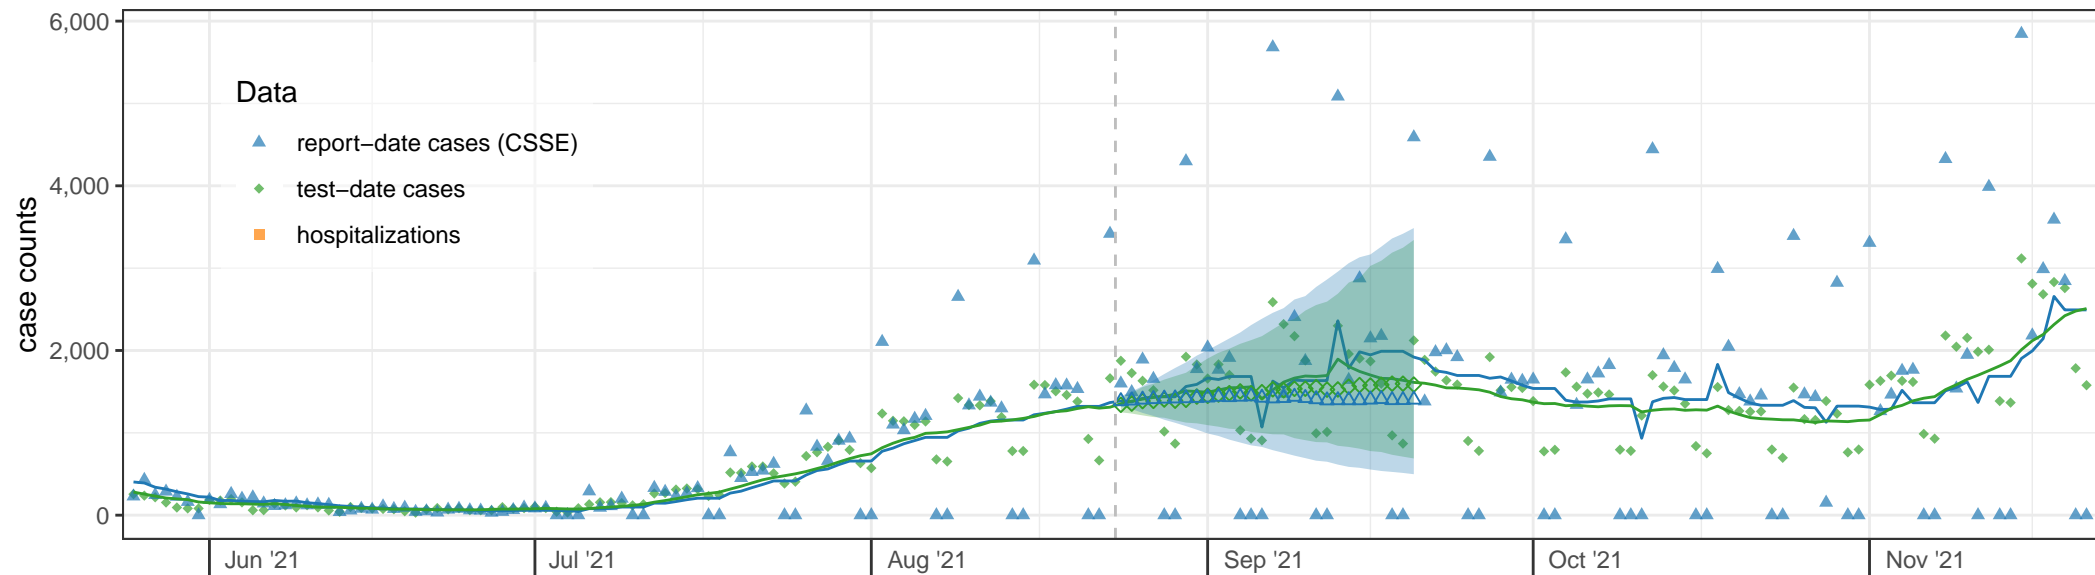

Massachusetts hospitalization data and forecasts: 2021-08-23

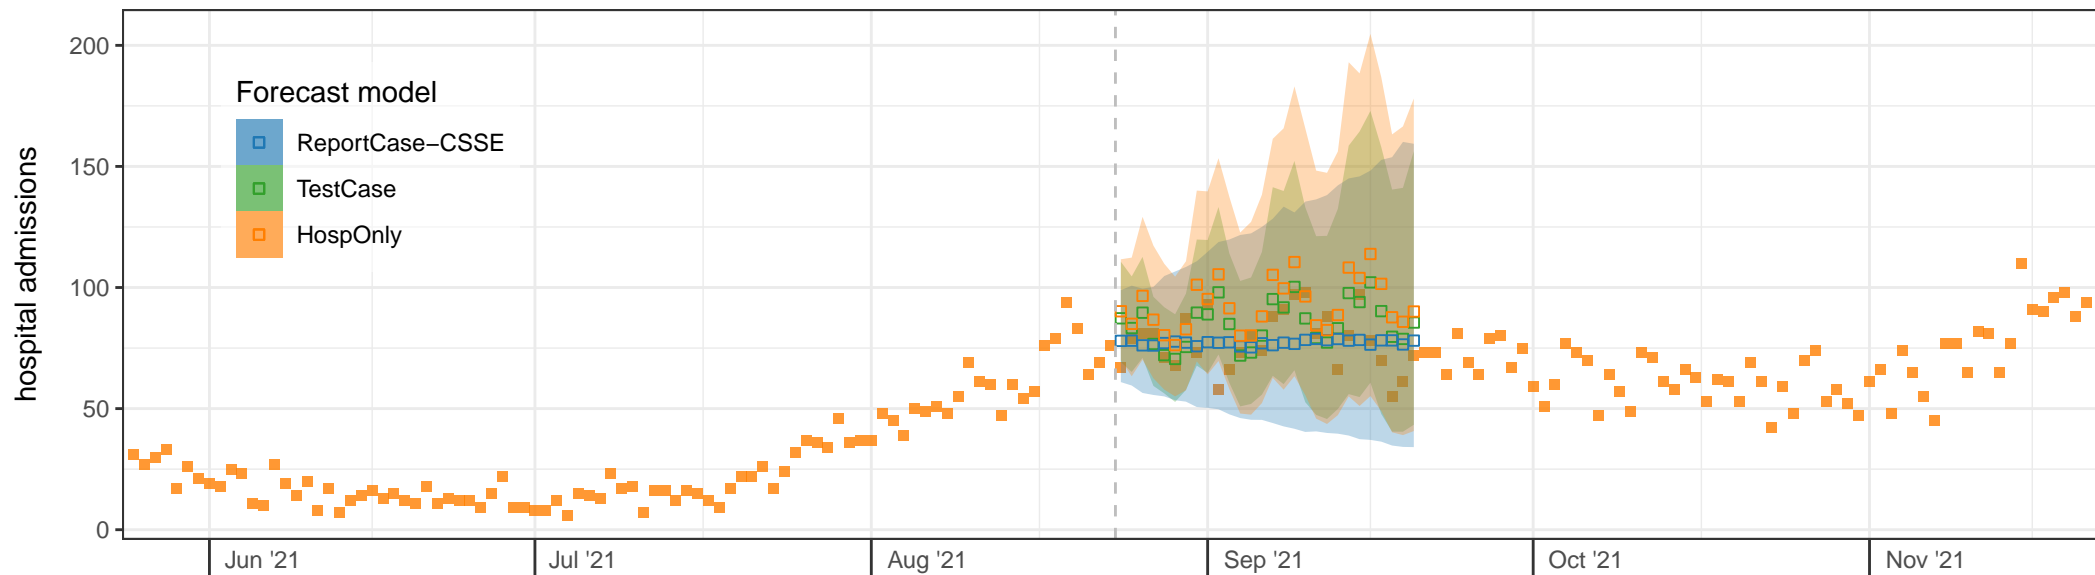

Massachusetts case data and forecasts: 2021-08-30

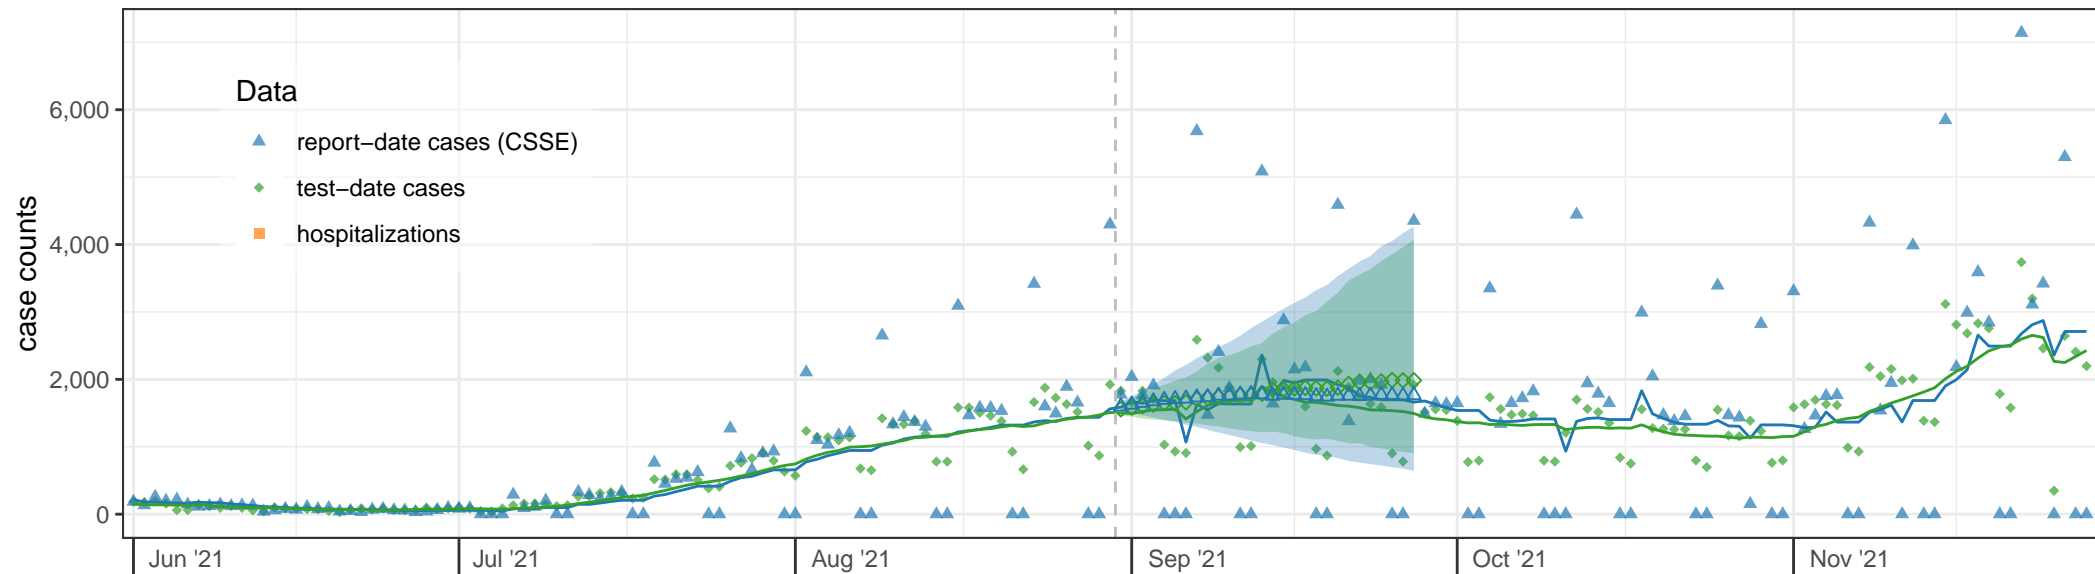

Massachusetts hospitalization data and forecasts: 2021-08-30

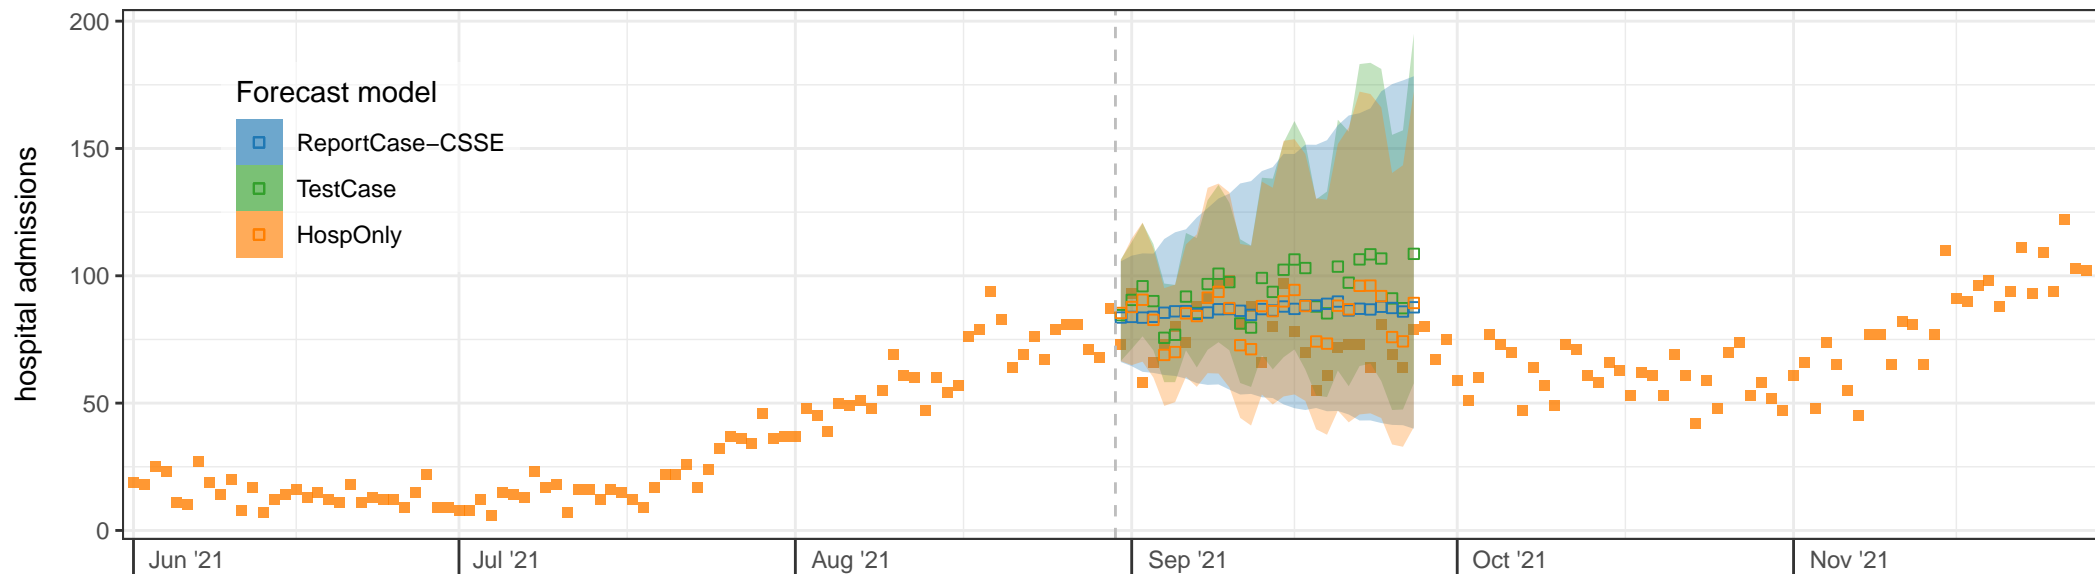

Massachusetts case data and forecasts: 2021-09-06

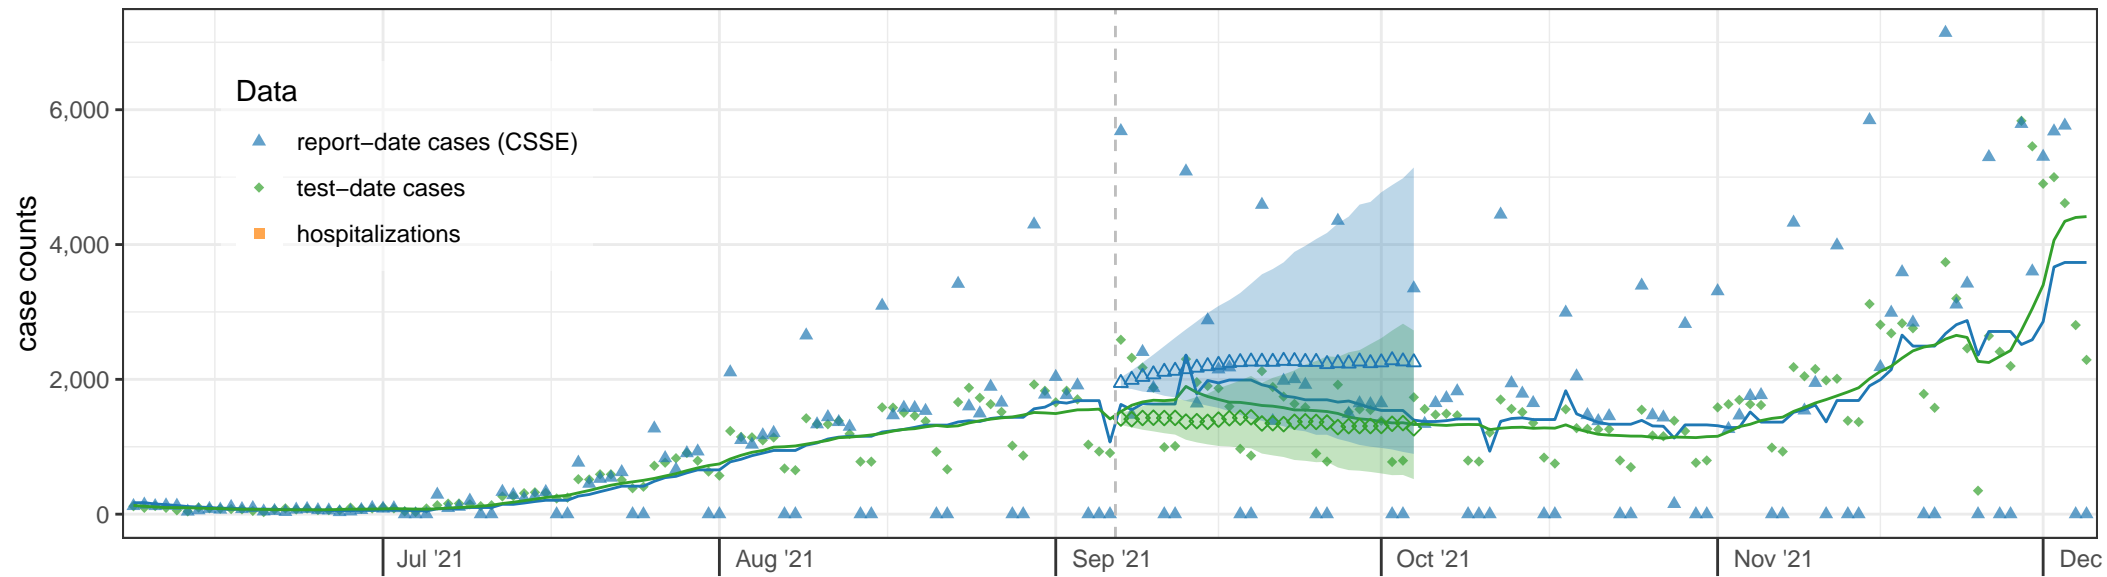

Massachusetts hospitalization data and forecasts: 2021-09-06

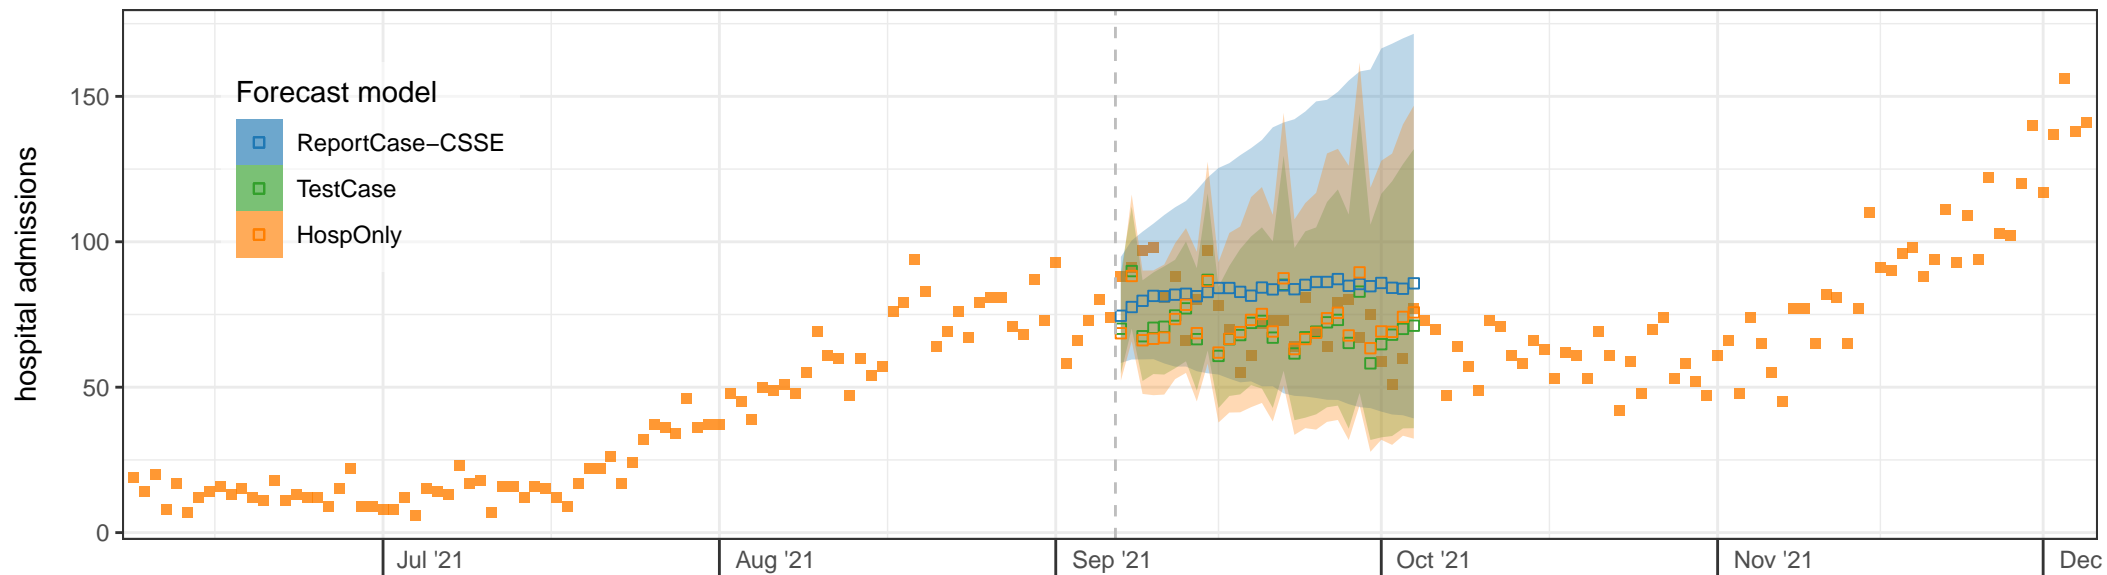

Massachusetts case data and forecasts: 2021-09-13

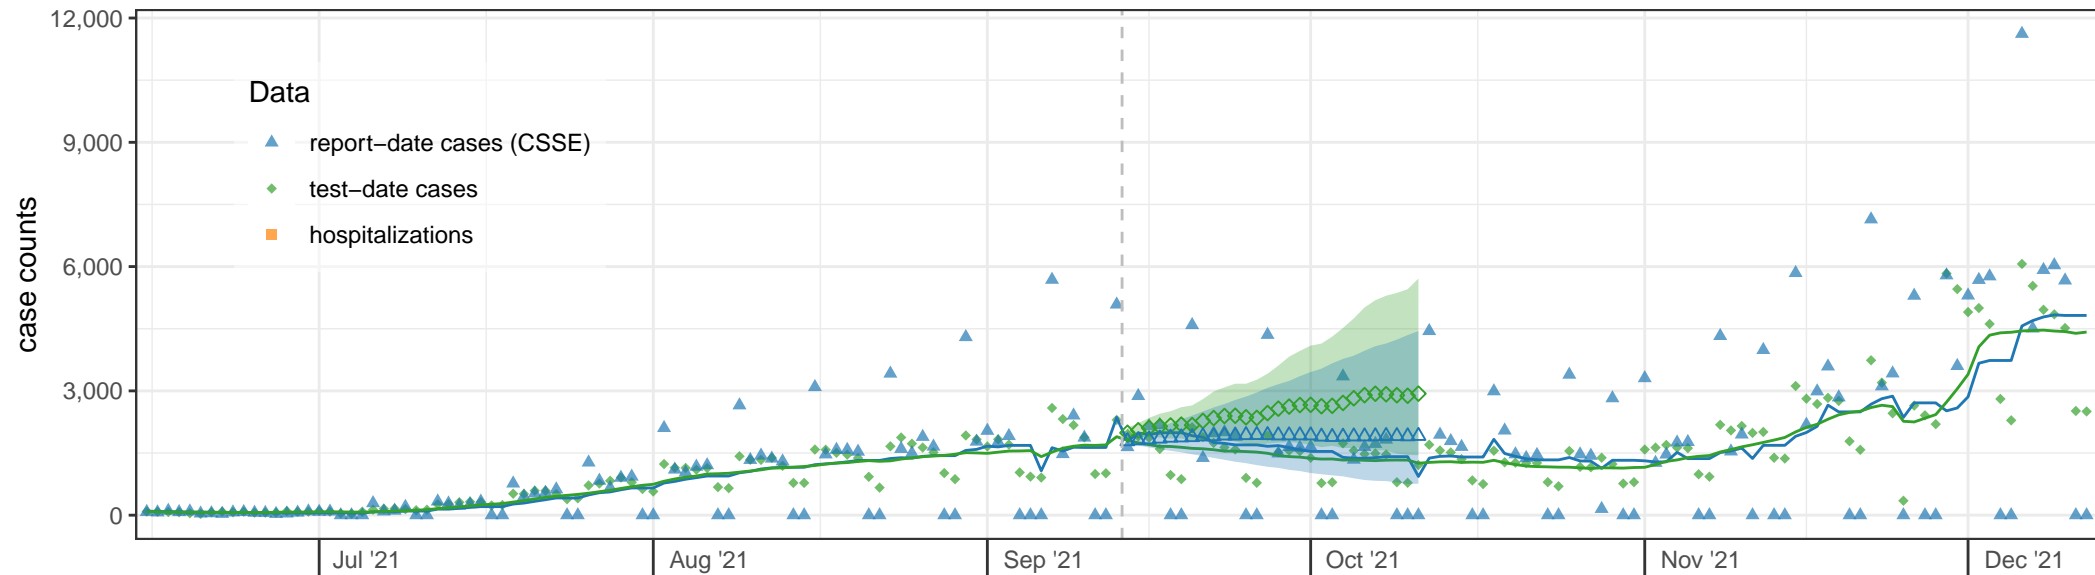

Massachusetts hospitalization data and forecasts: 2021-09-13

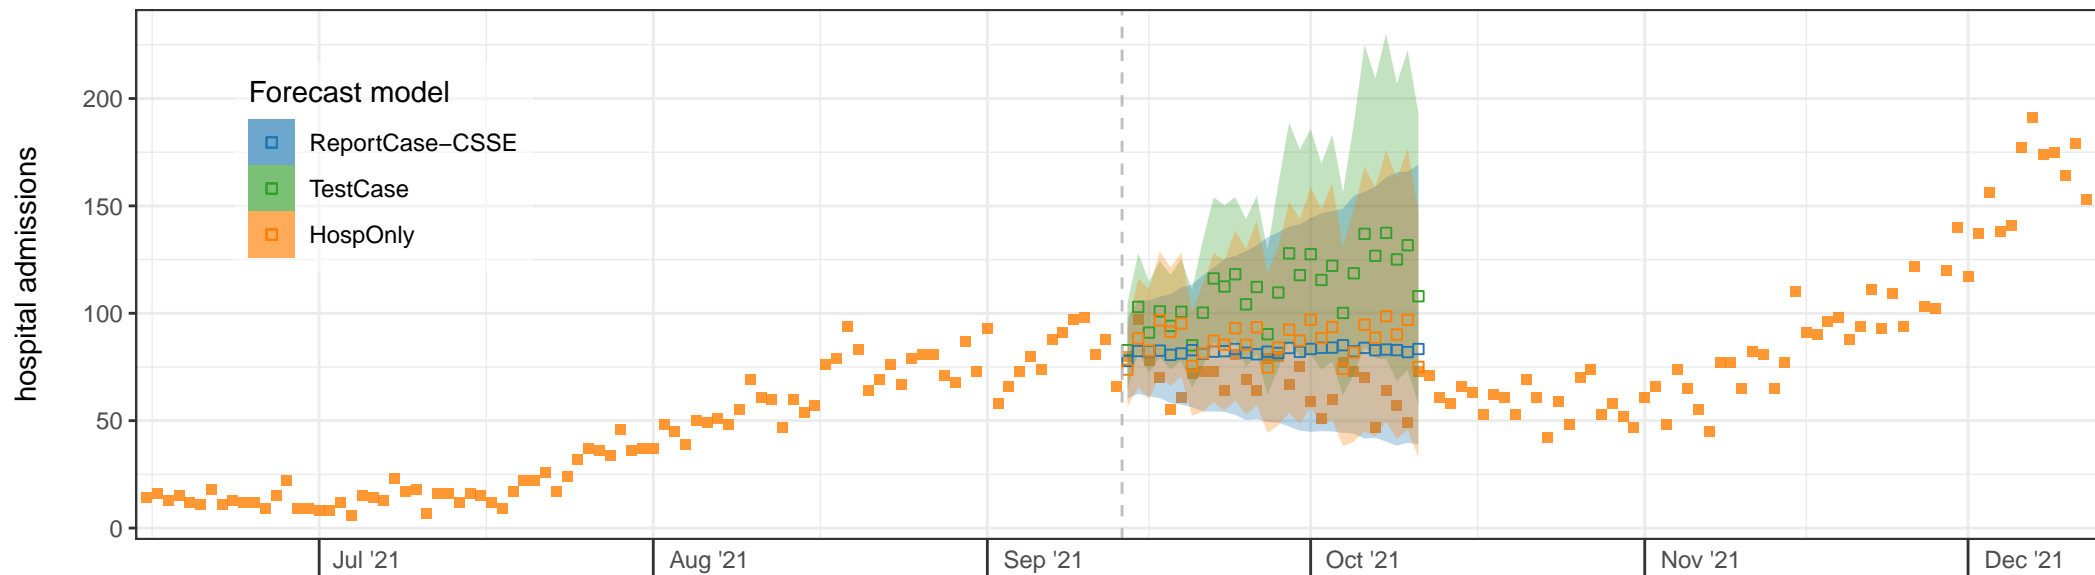

Massachusetts case data and forecasts: 2021-09-20

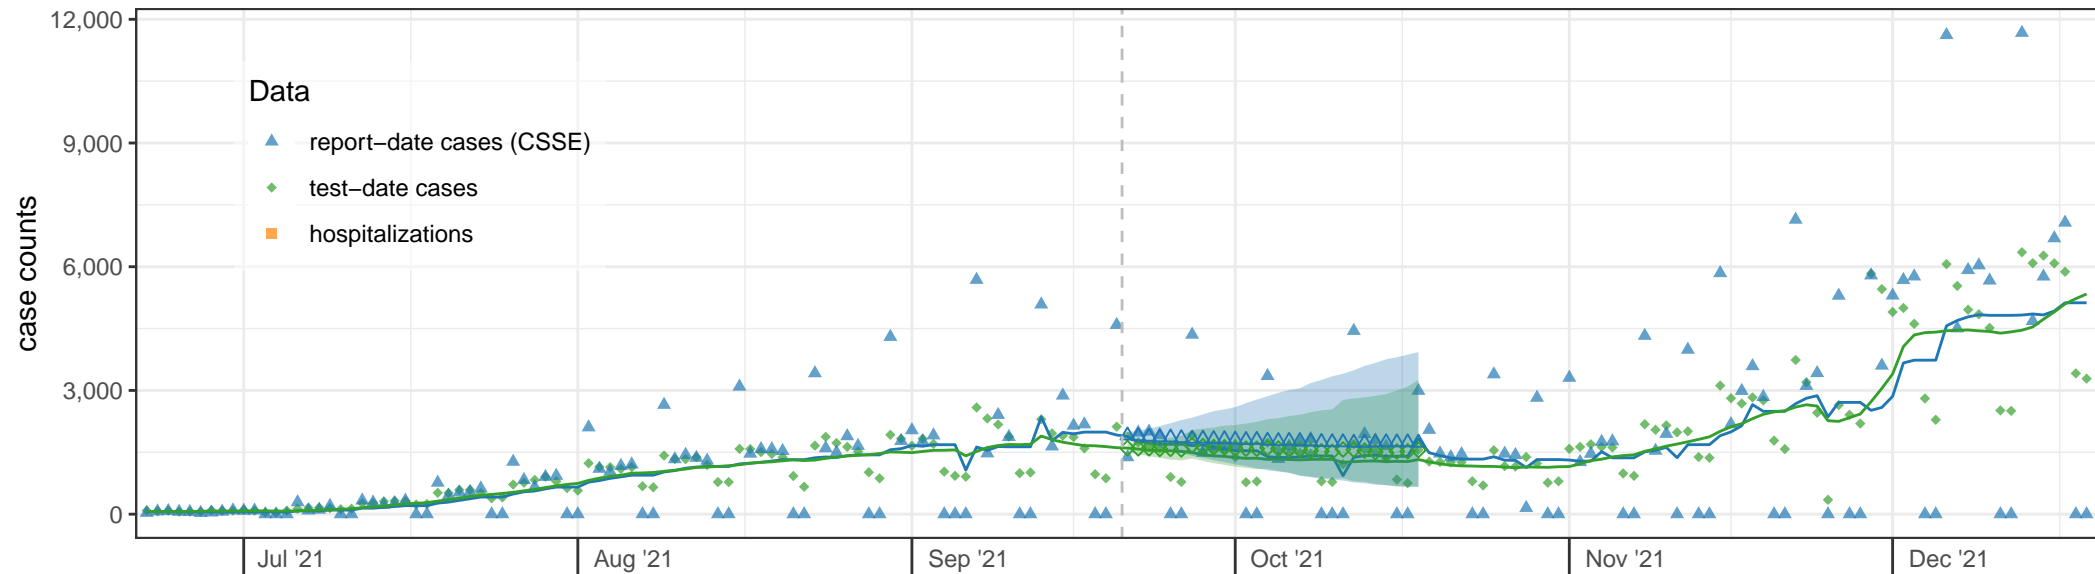

Massachusetts hospitalization data and forecasts: 2021-09-20

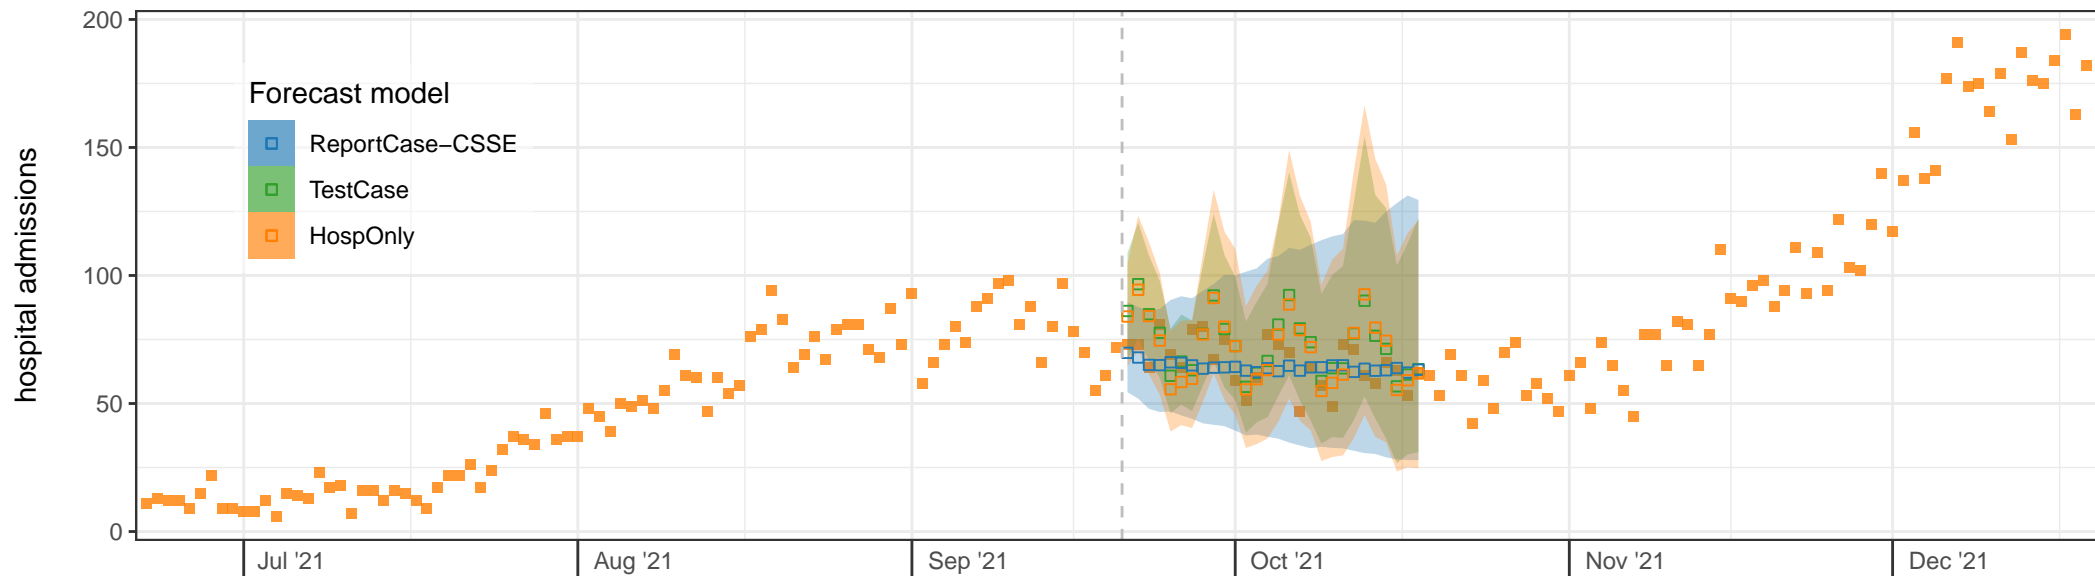



Massachusetts case data and forecasts: 2021-09-27

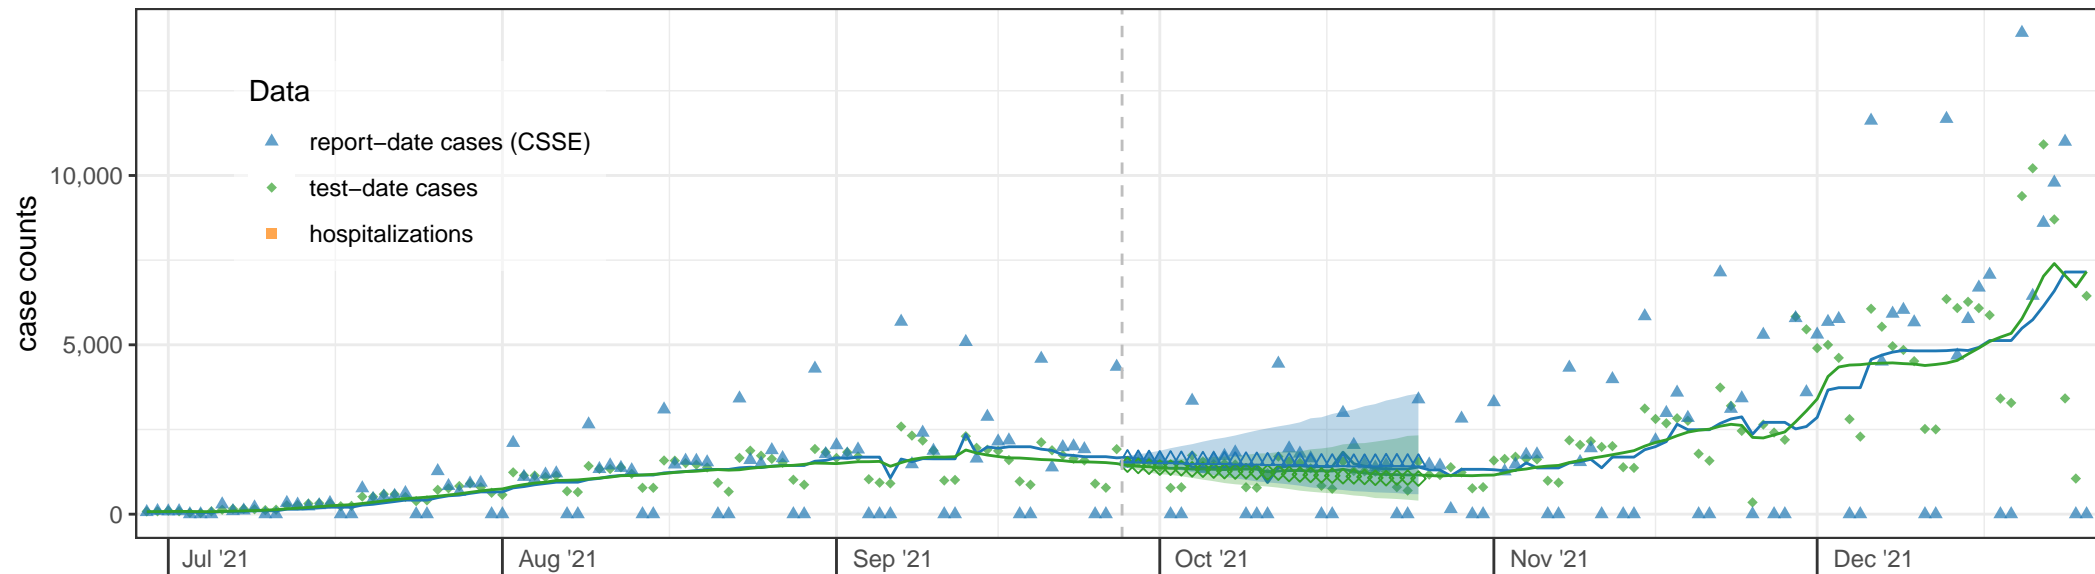

Massachusetts hospitalization data and forecasts: 2021-09-27

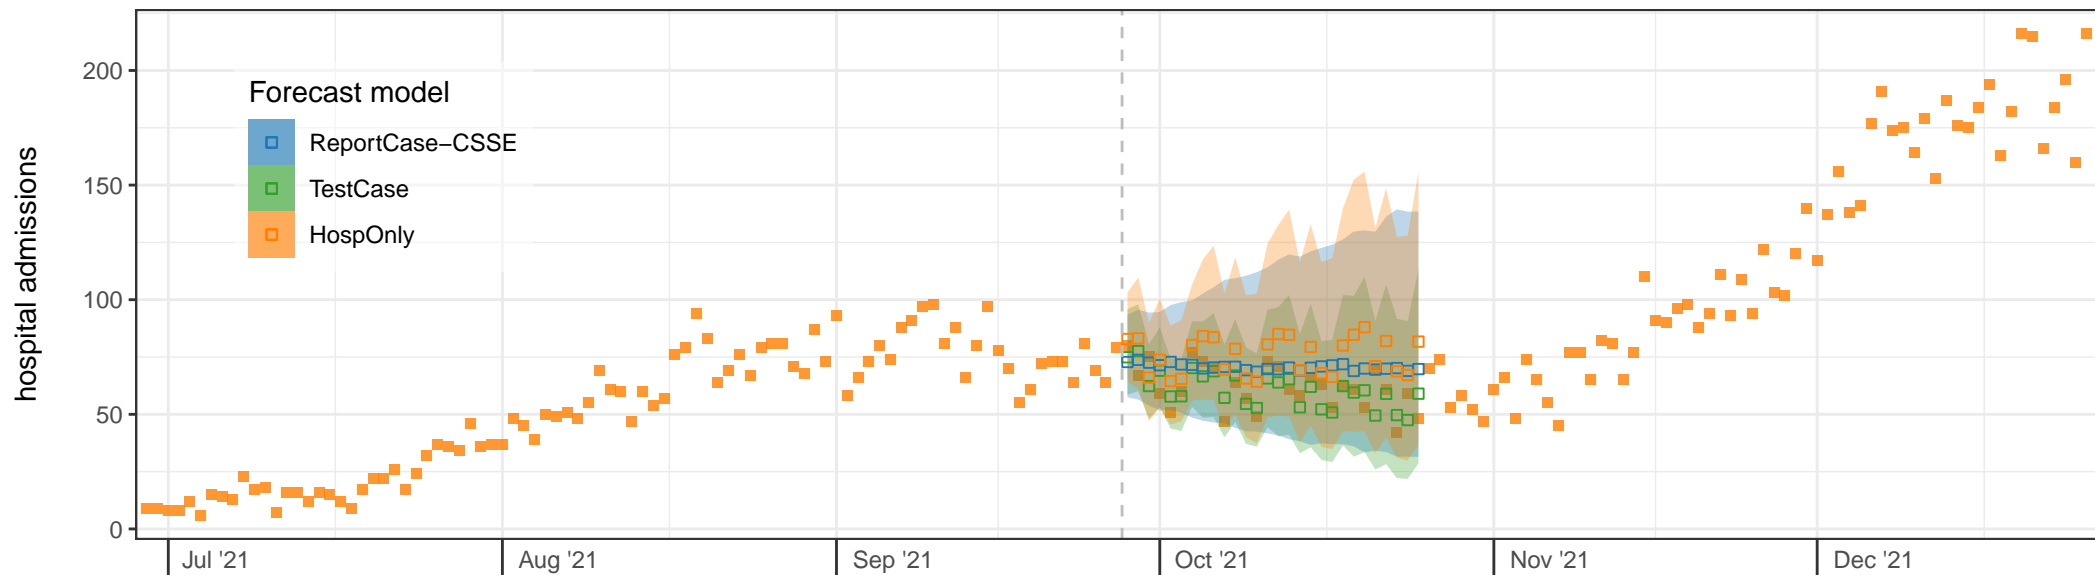

Massachusetts case data and forecasts: 2021-10-04

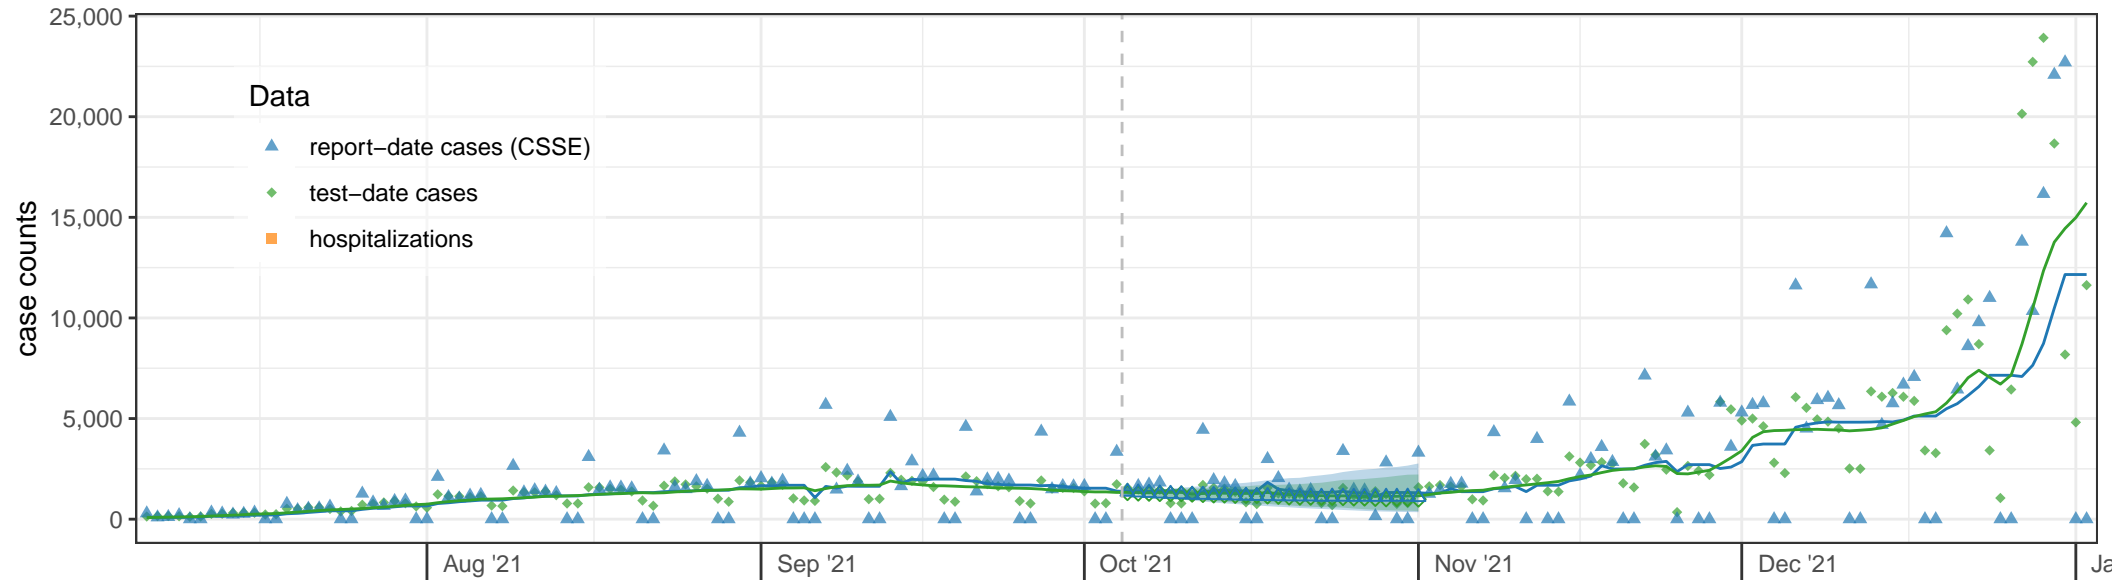

Massachusetts hospitalization data and forecasts: 2021-10-04

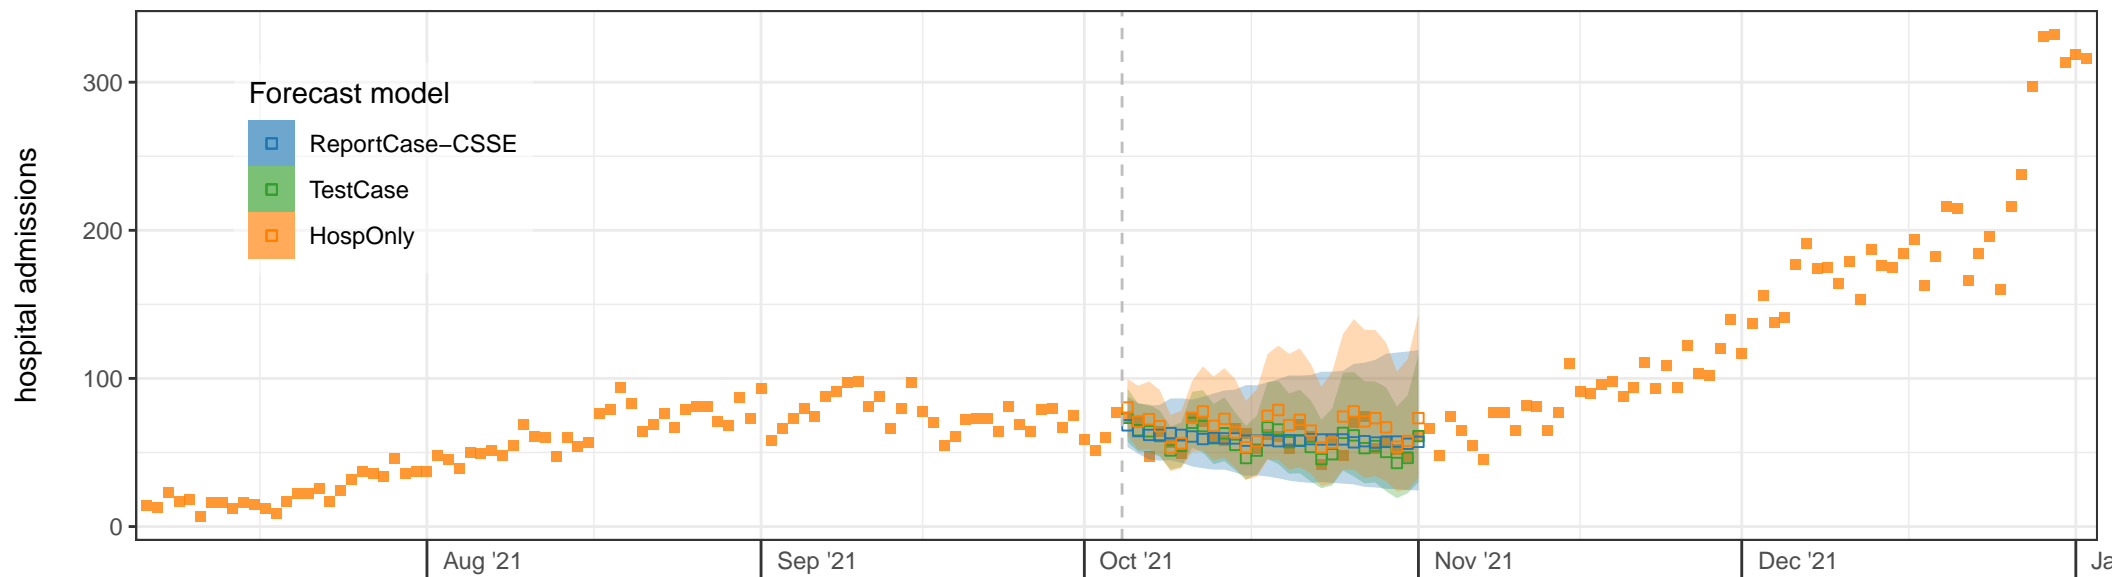

Massachusetts case data and forecasts: 2021-10-11

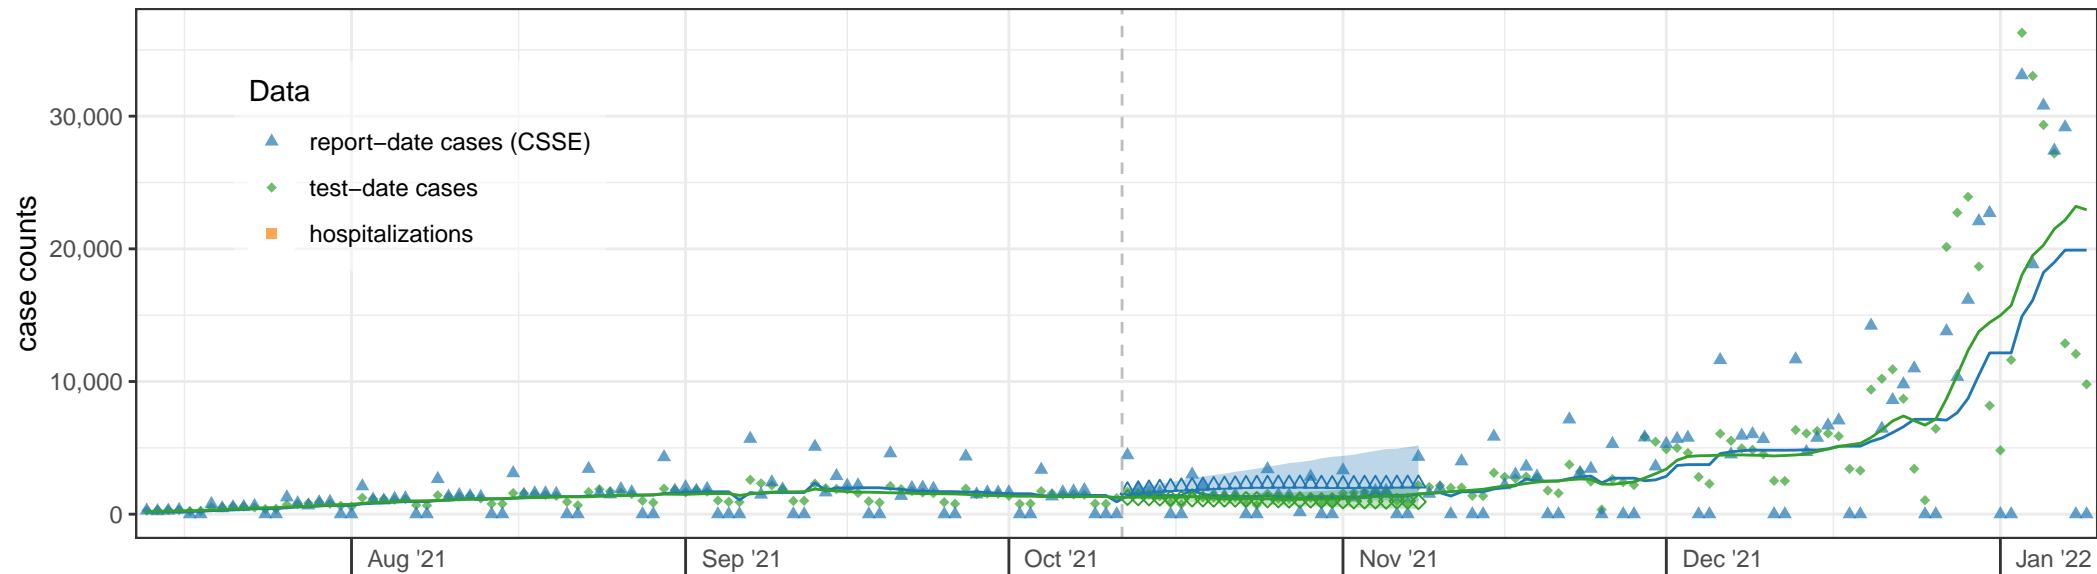

Massachusetts hospitalization data and forecasts: 2021-10-11

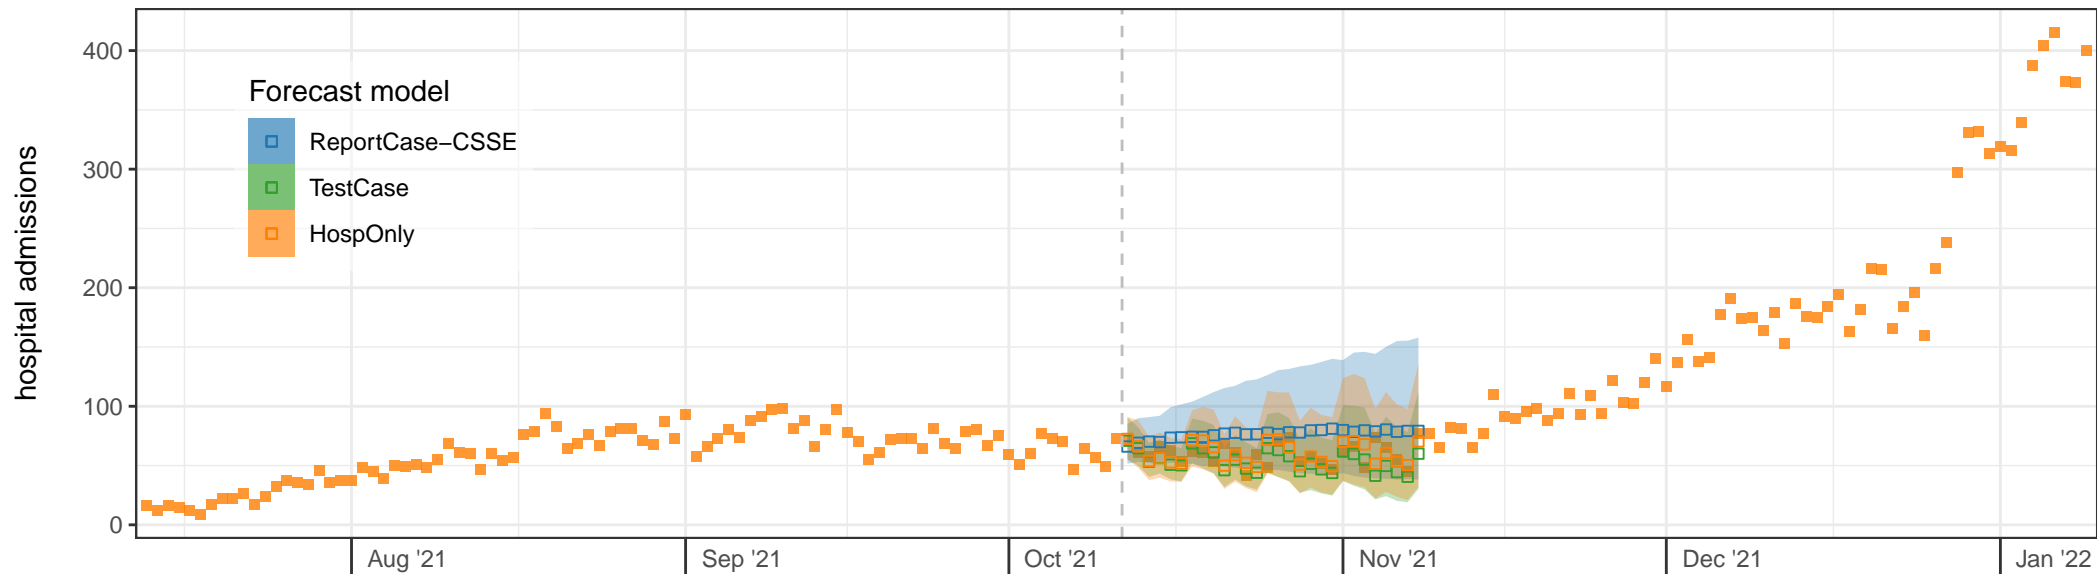

Massachusetts case data and forecasts: 2021-10-18

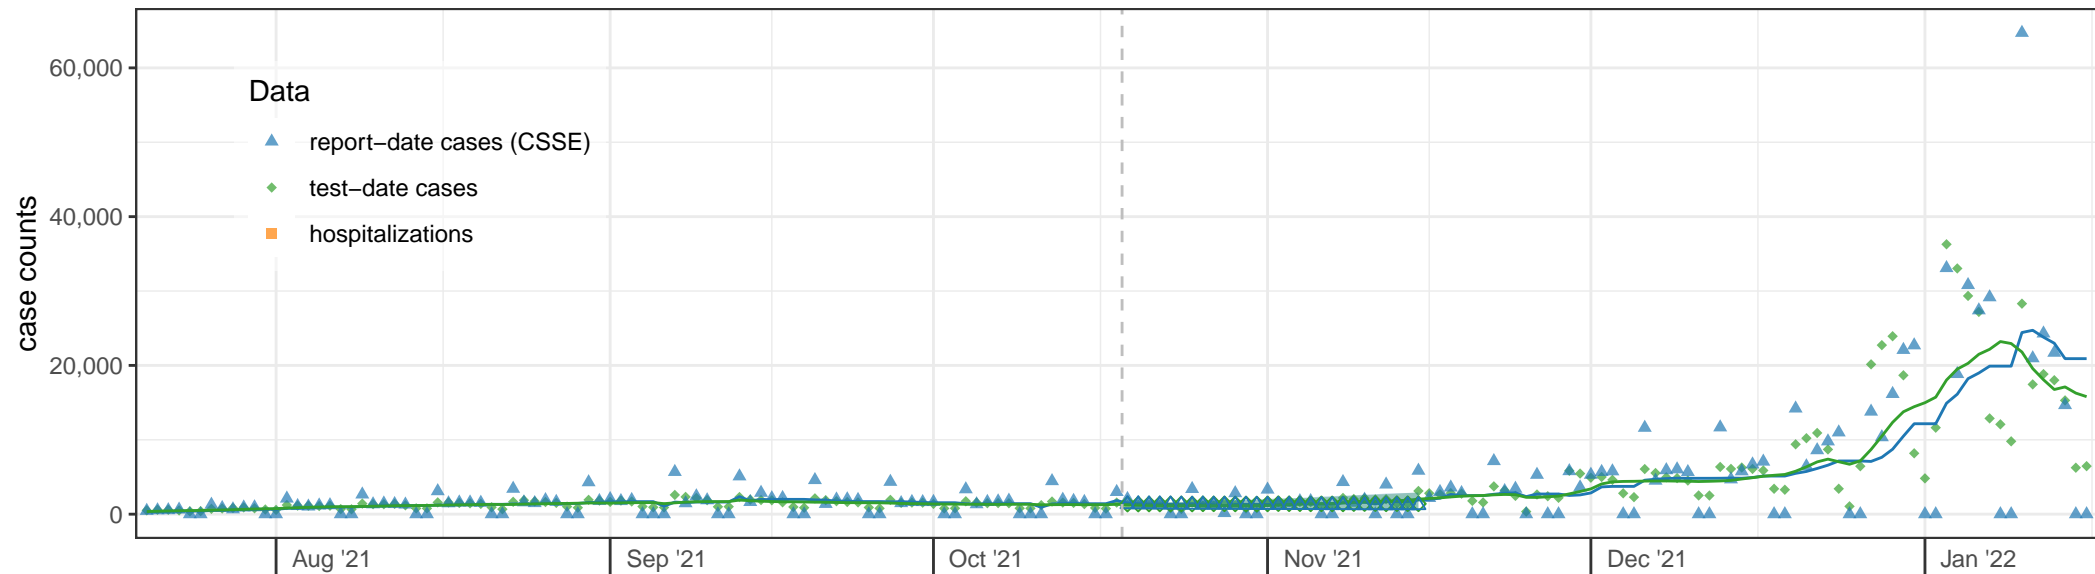

Massachusetts hospitalization data and forecasts: 2021-10-18

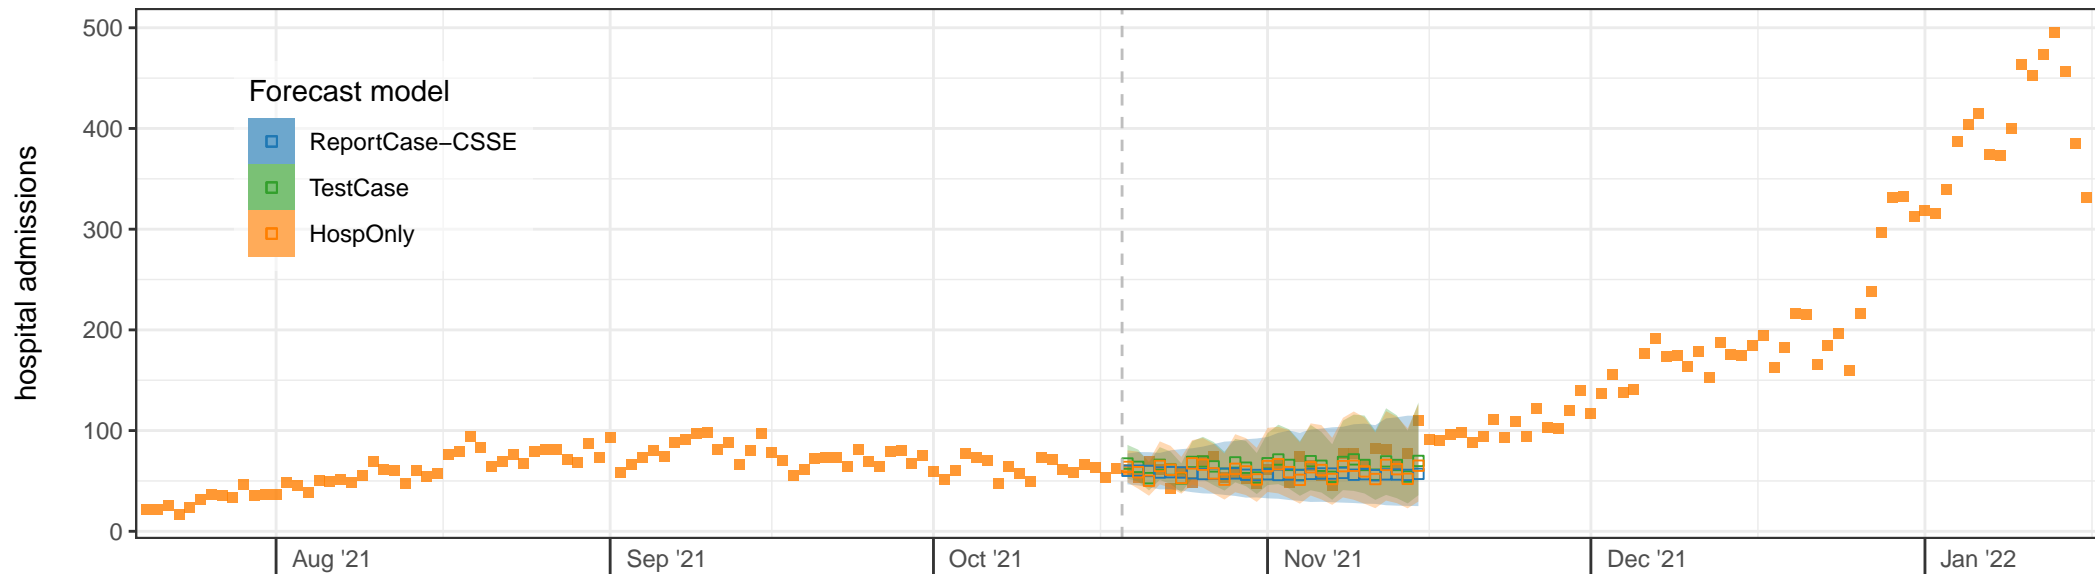

### Massachusetts case data and forecasts: 2021-10-25

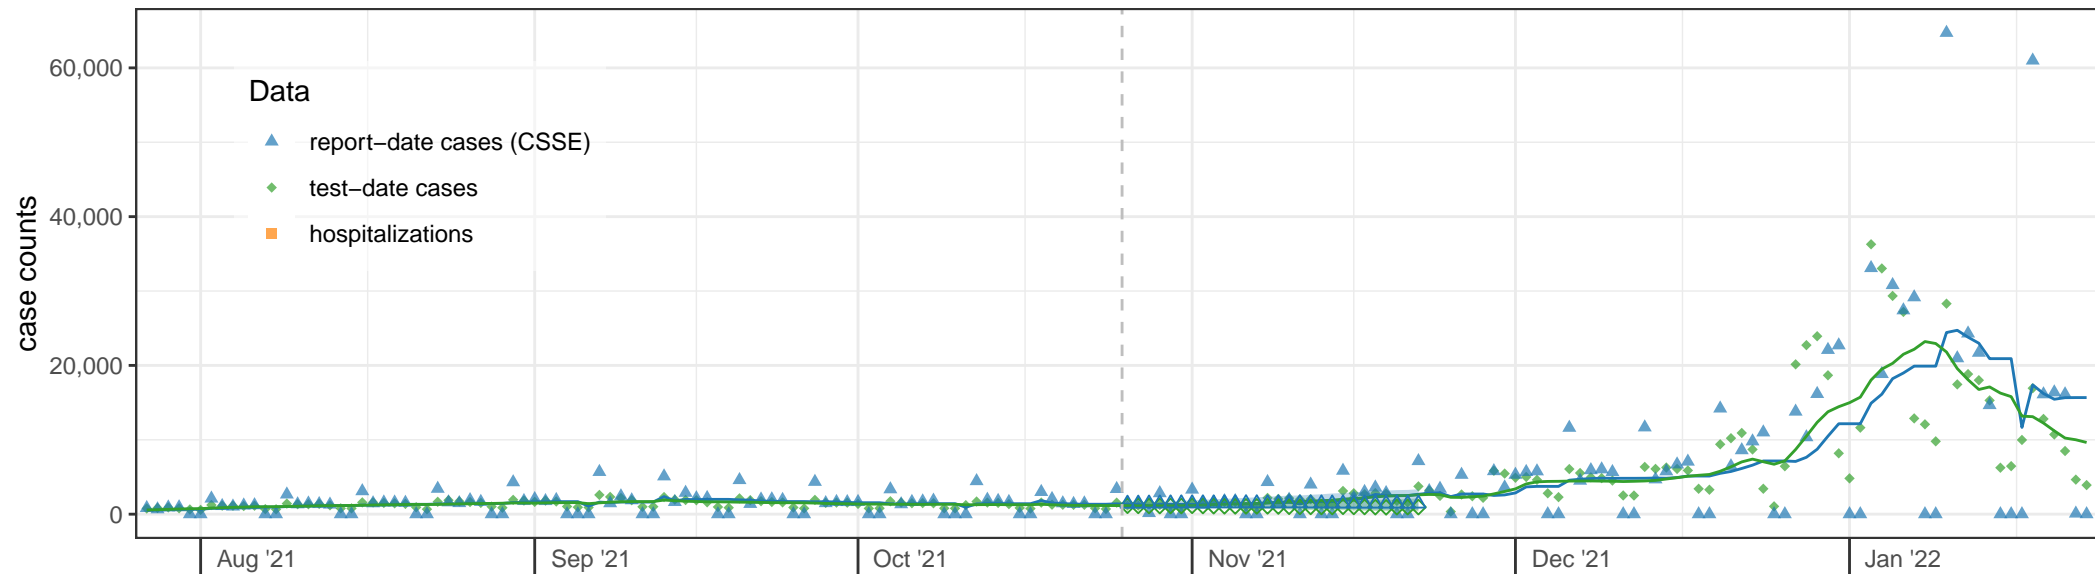

### Massachusetts hospitalization data and forecasts: 2021-10-25

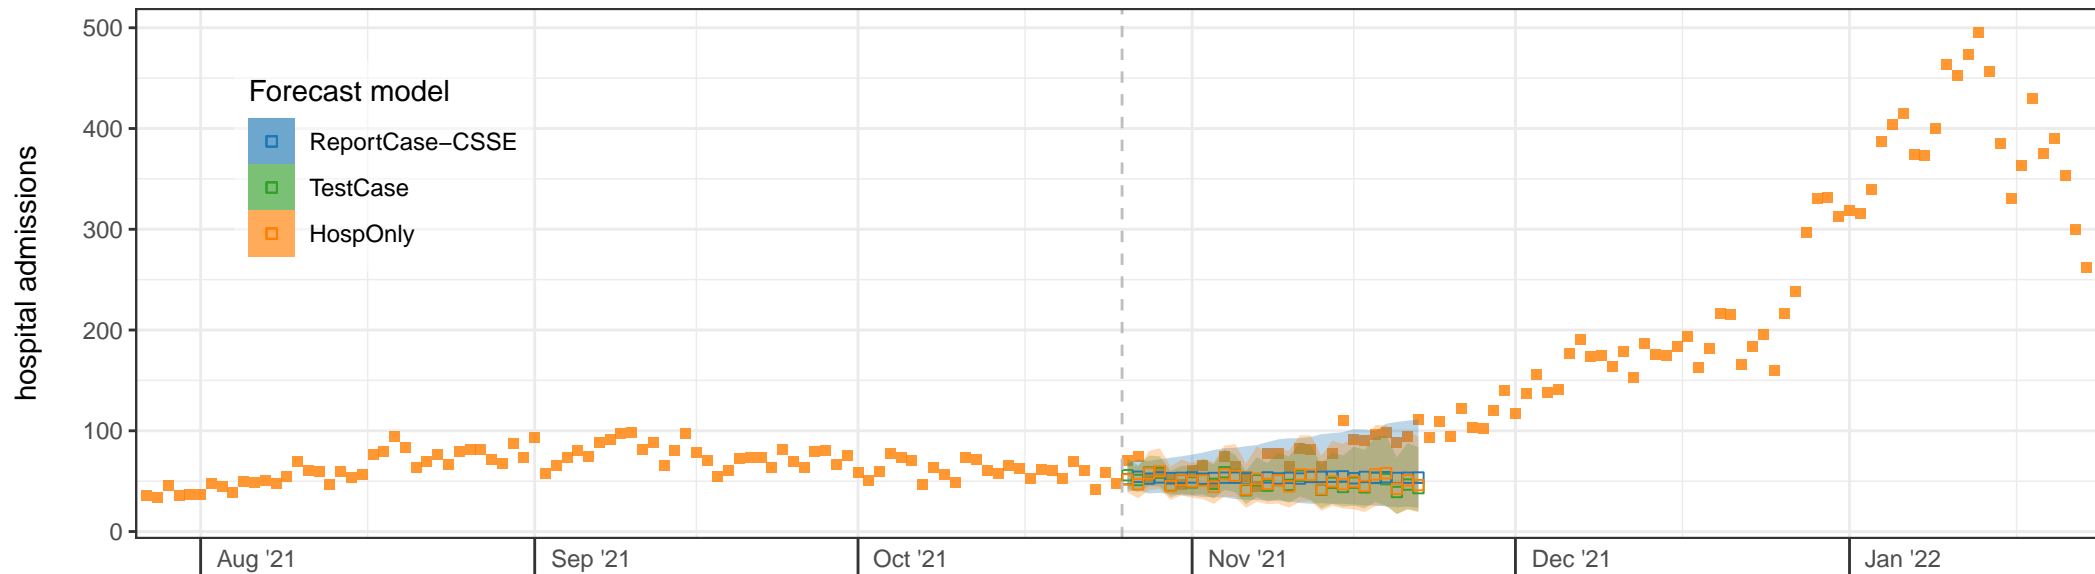

Massachusetts case data and forecasts: 2021-11-01

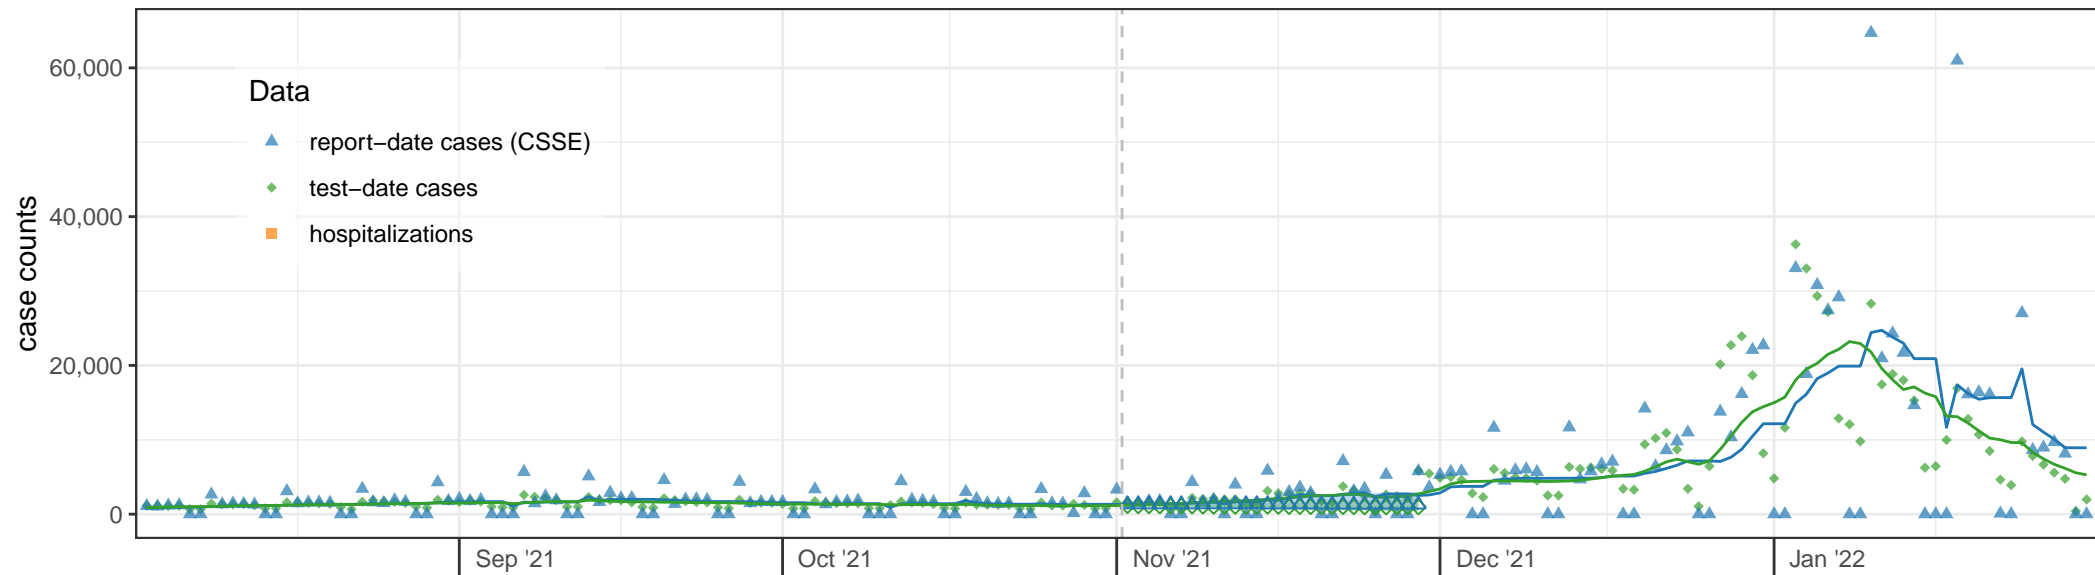

Massachusetts hospitalization data and forecasts: 2021-11-01

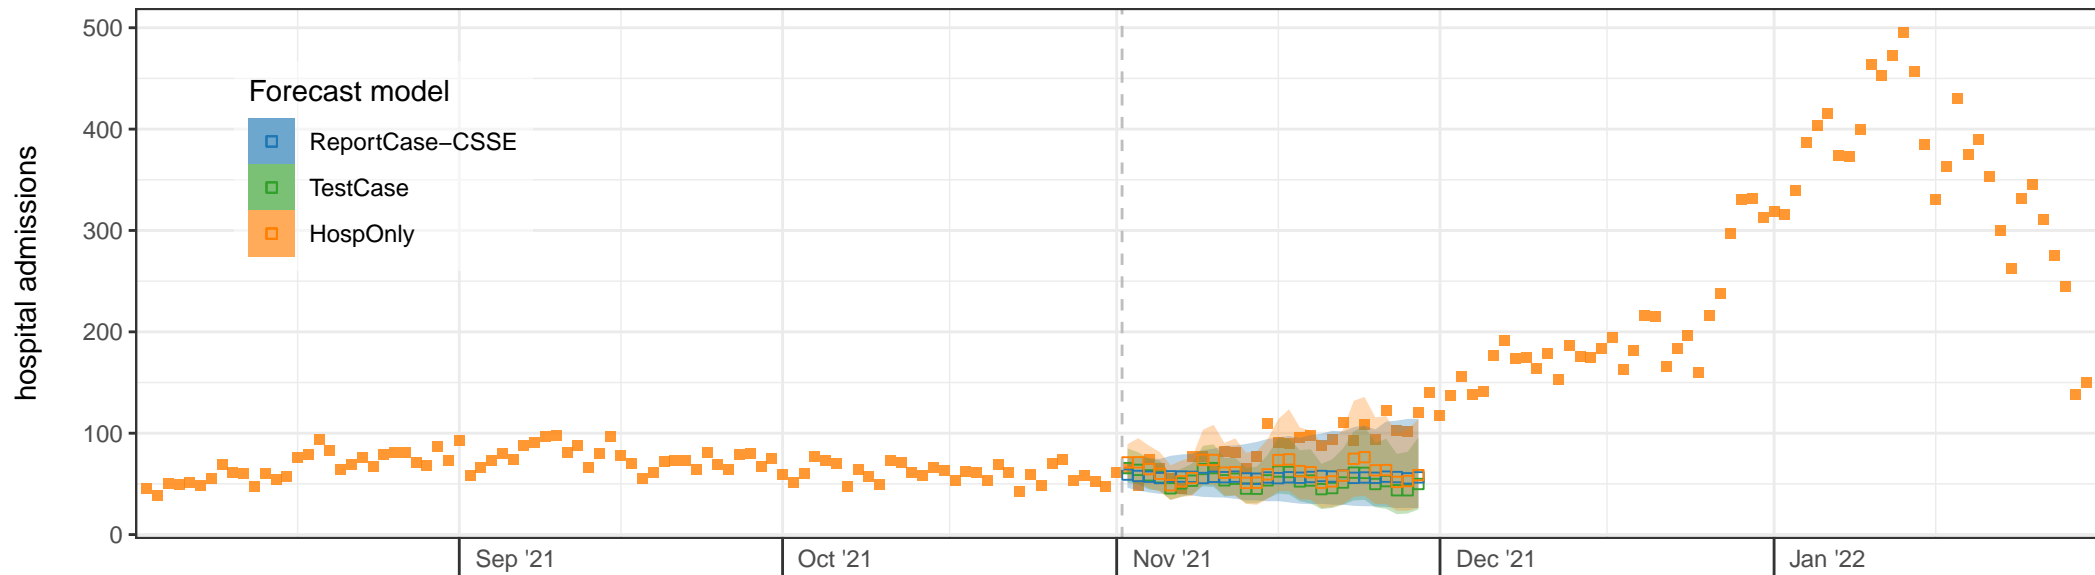

Massachusetts case data and forecasts: 2021-11-08

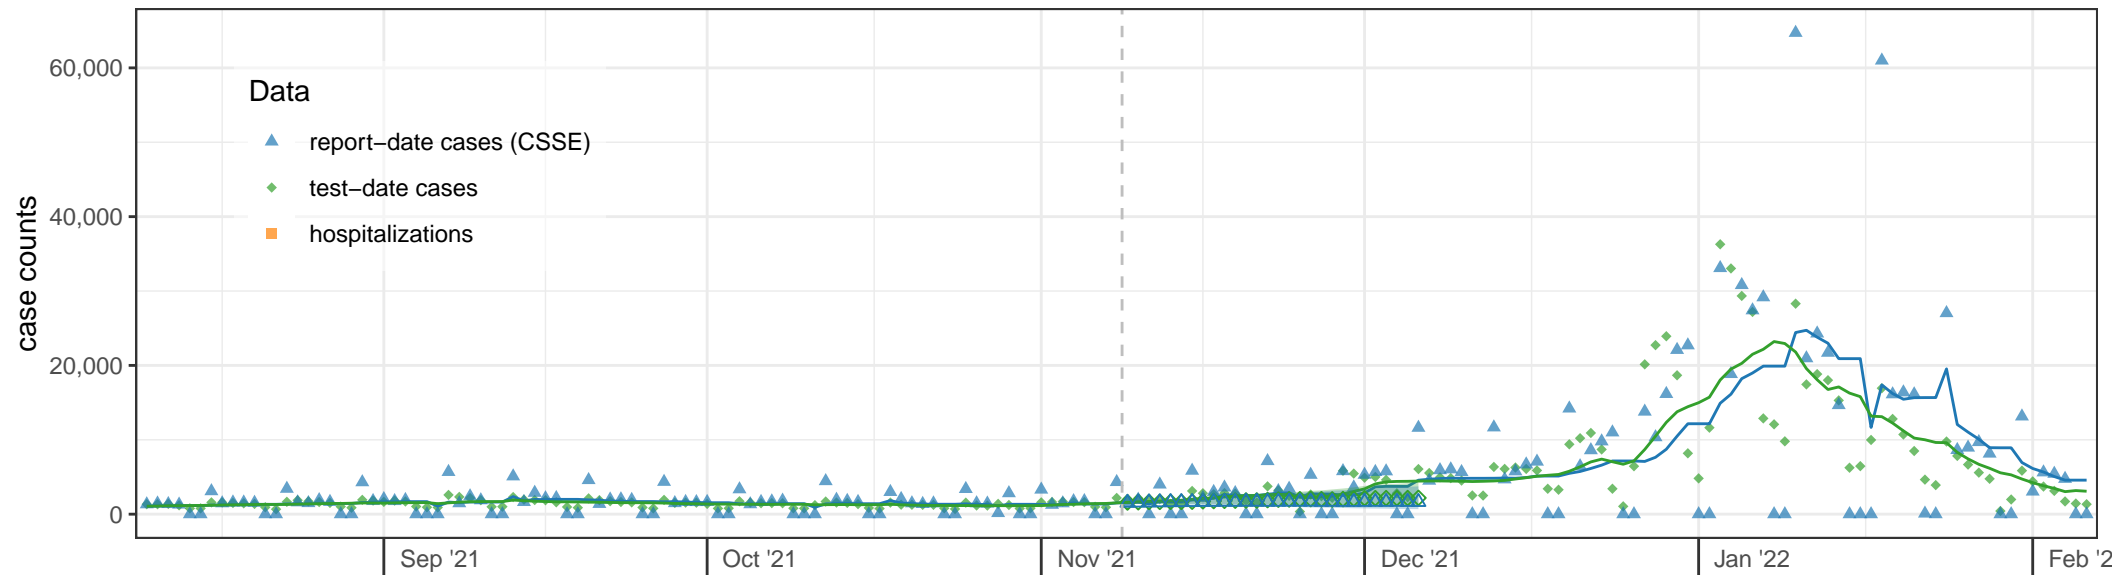

Massachusetts hospitalization data and forecasts: 2021-11-08

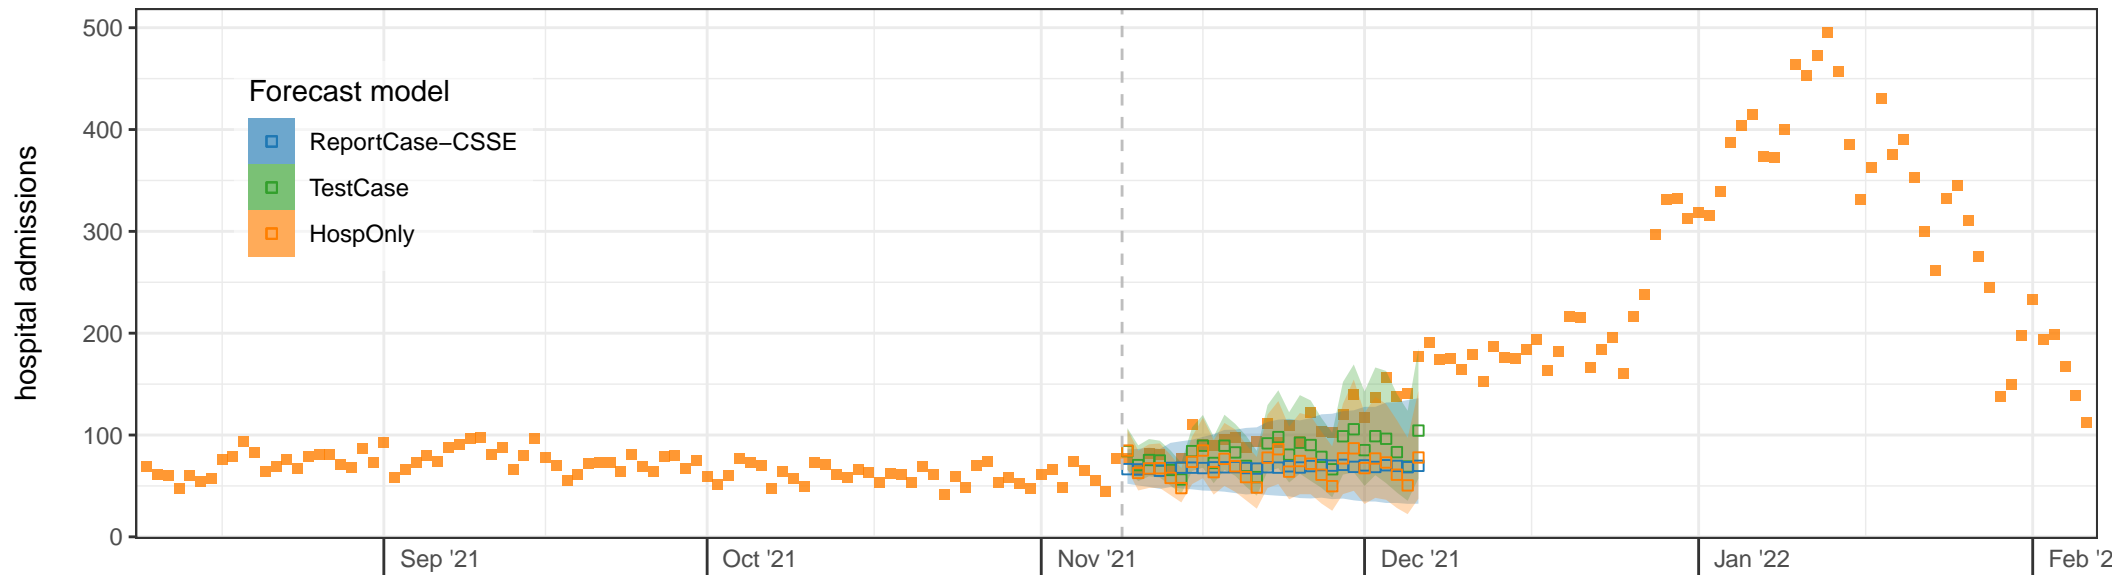

Massachusetts case data and forecasts: 2021-11-15

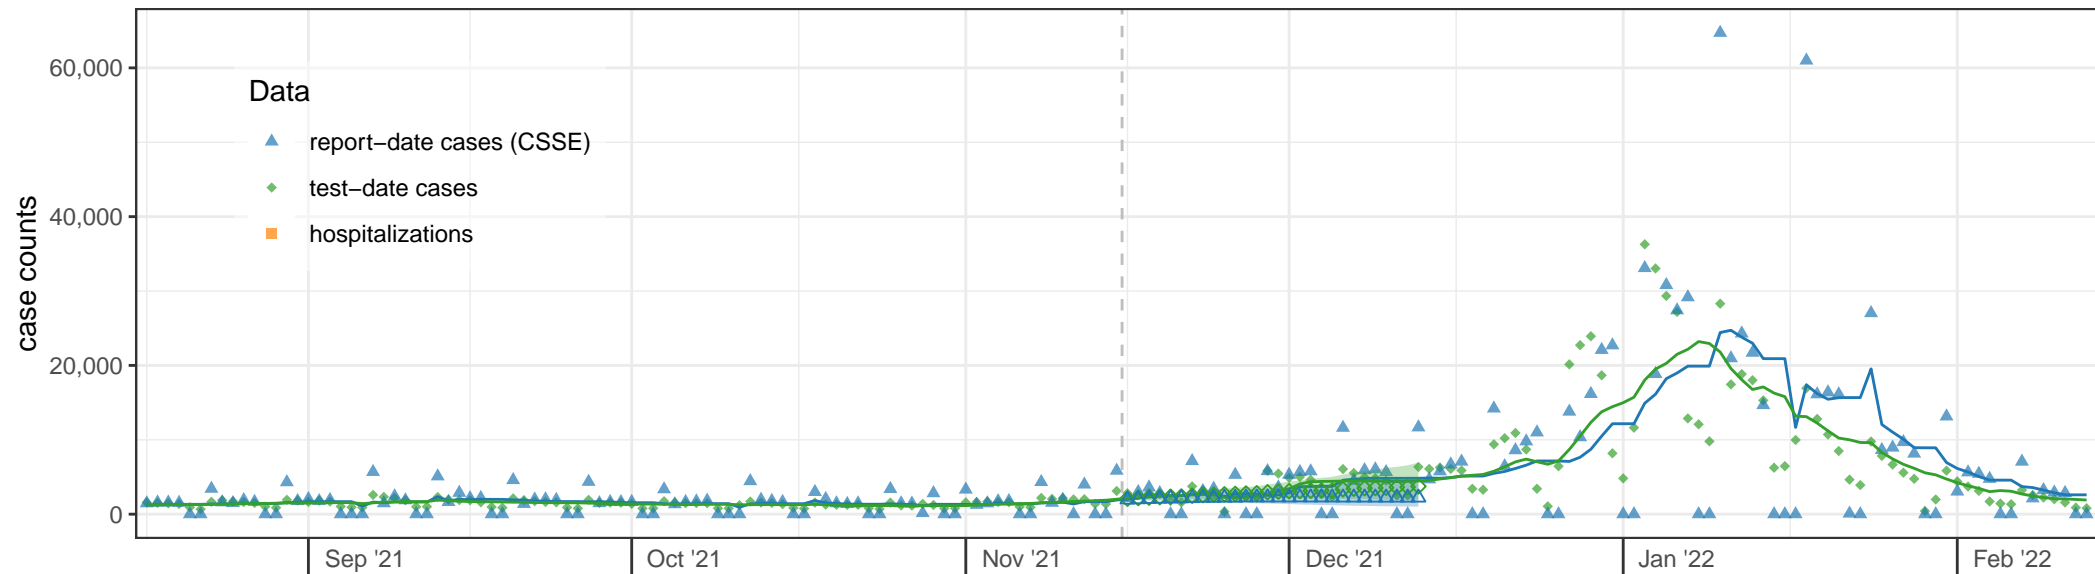

Massachusetts hospitalization data and forecasts: 2021-11-15

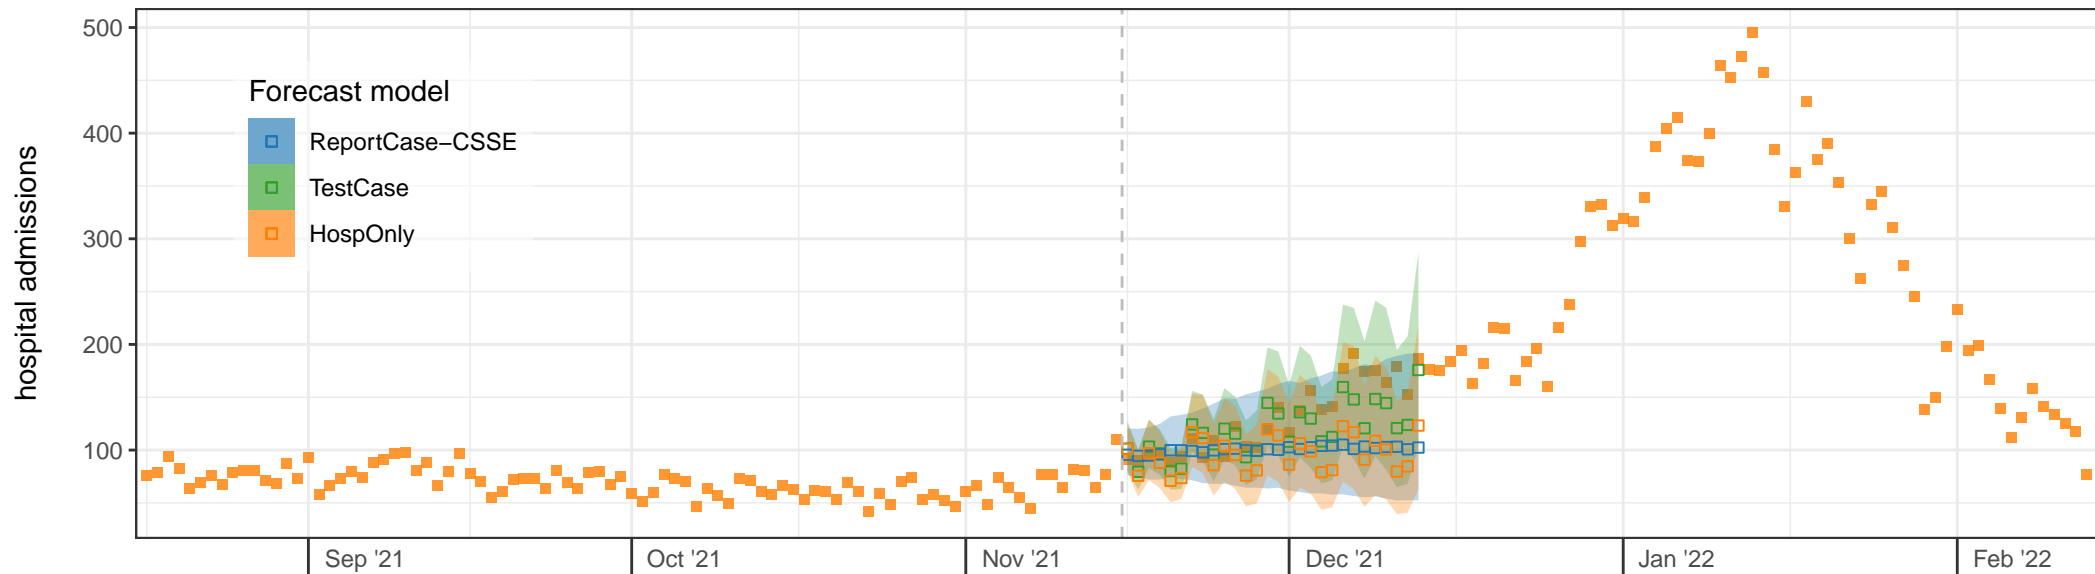



### Massachusetts case data and forecasts: 2021-11-22

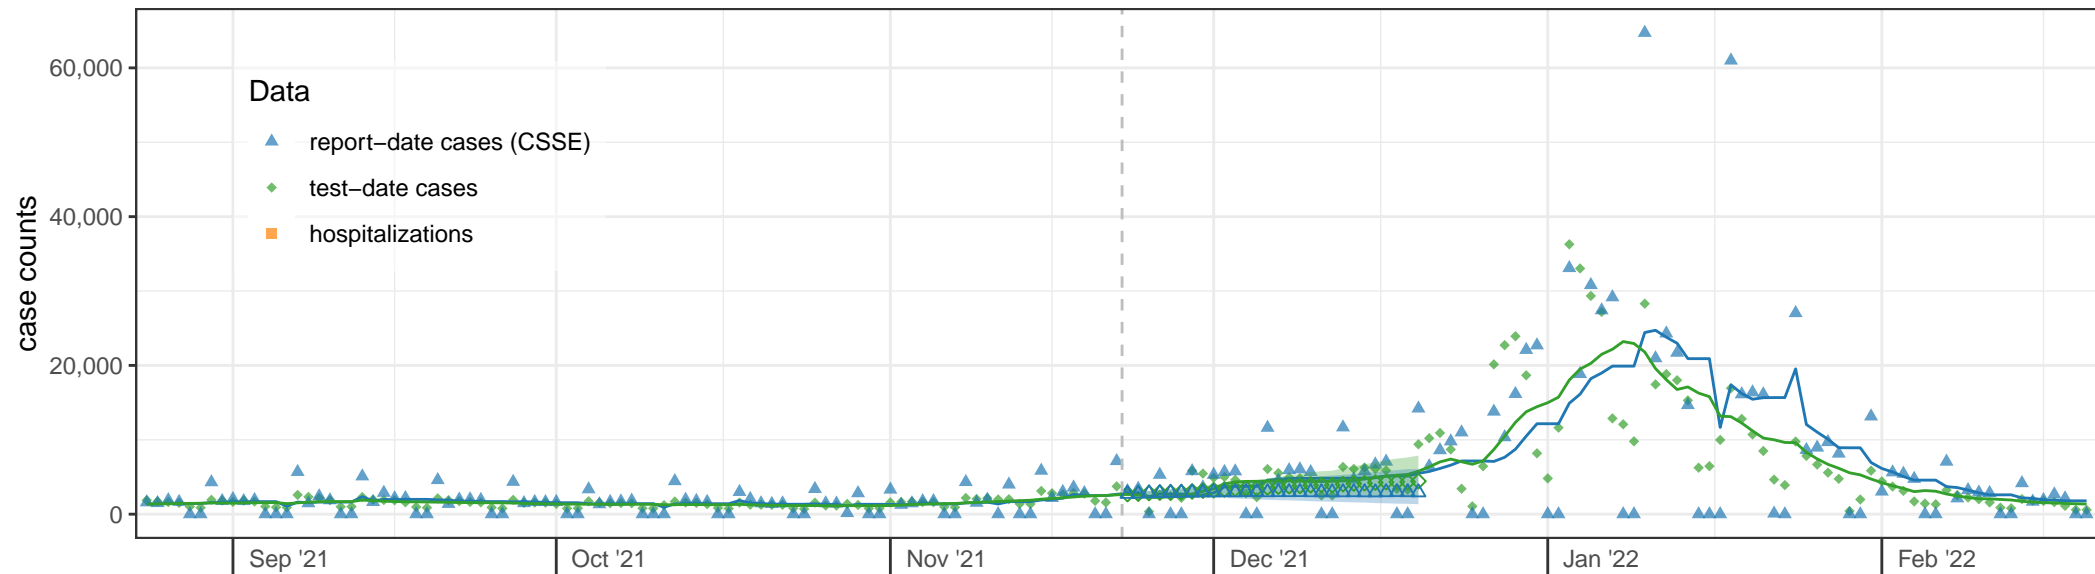

### Massachusetts hospitalization data and forecasts: 2021-11-22

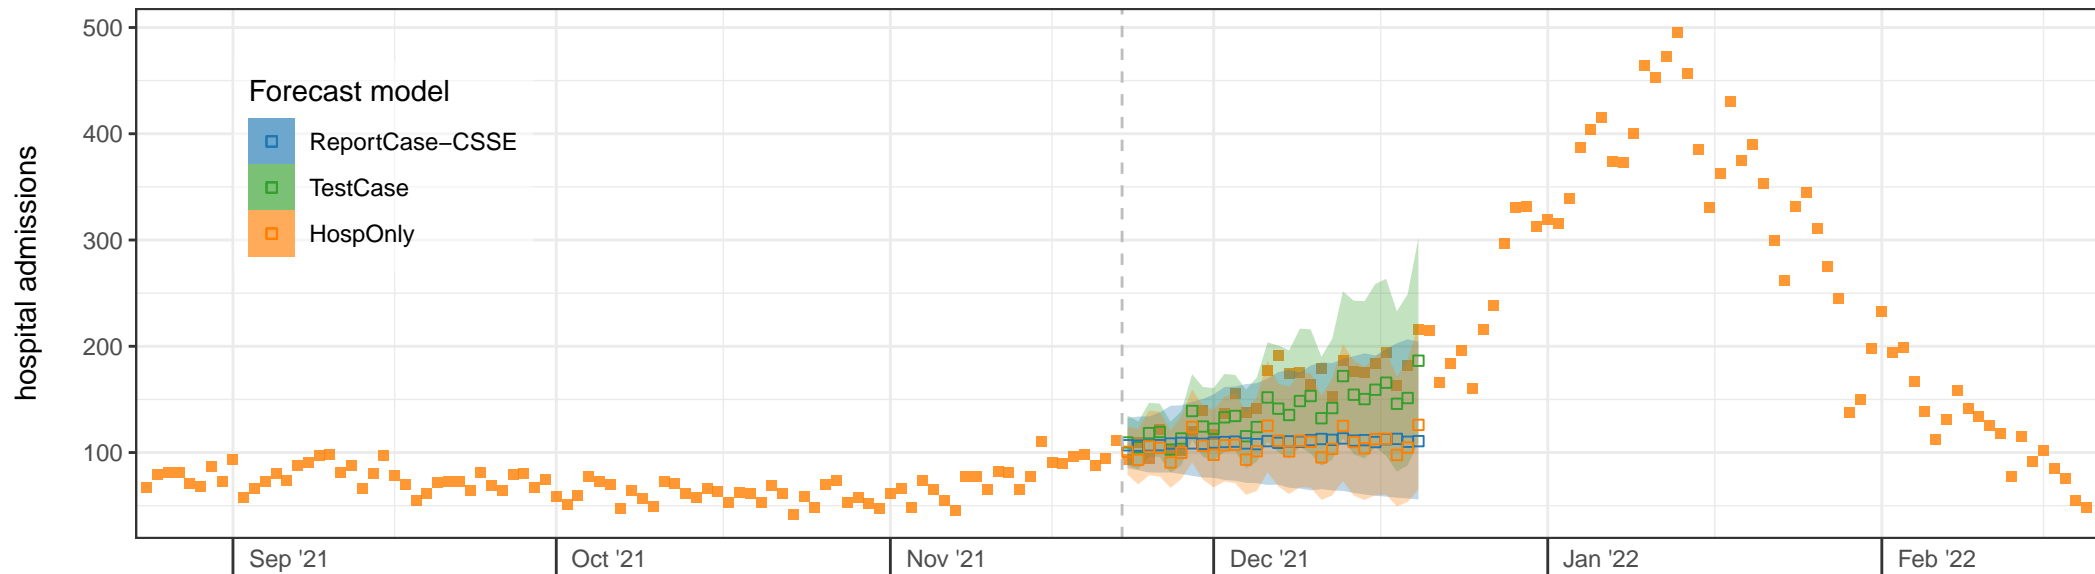

Massachusetts case data and forecasts: 2021-11-29

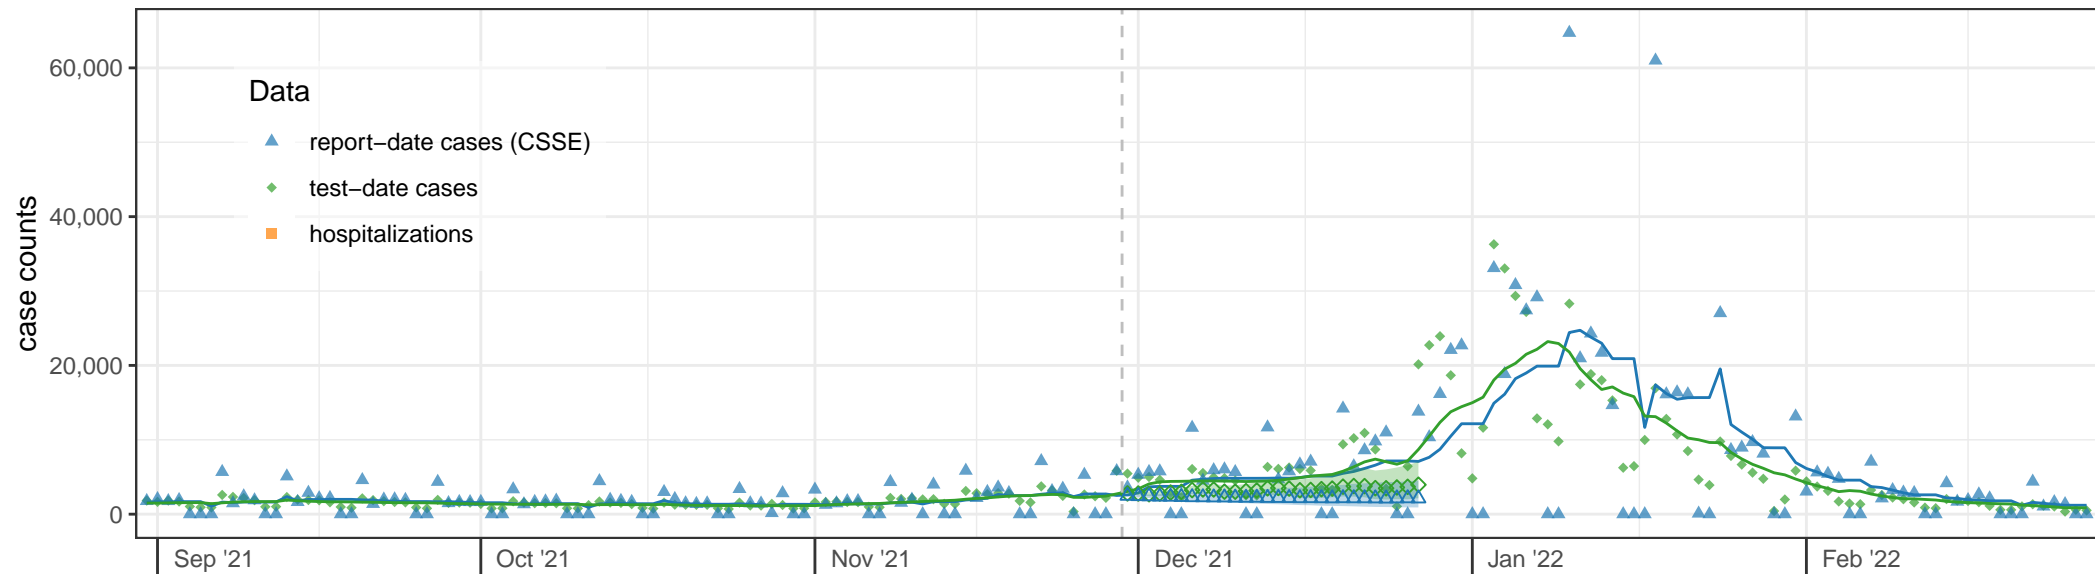

Massachusetts hospitalization data and forecasts: 2021-11-29

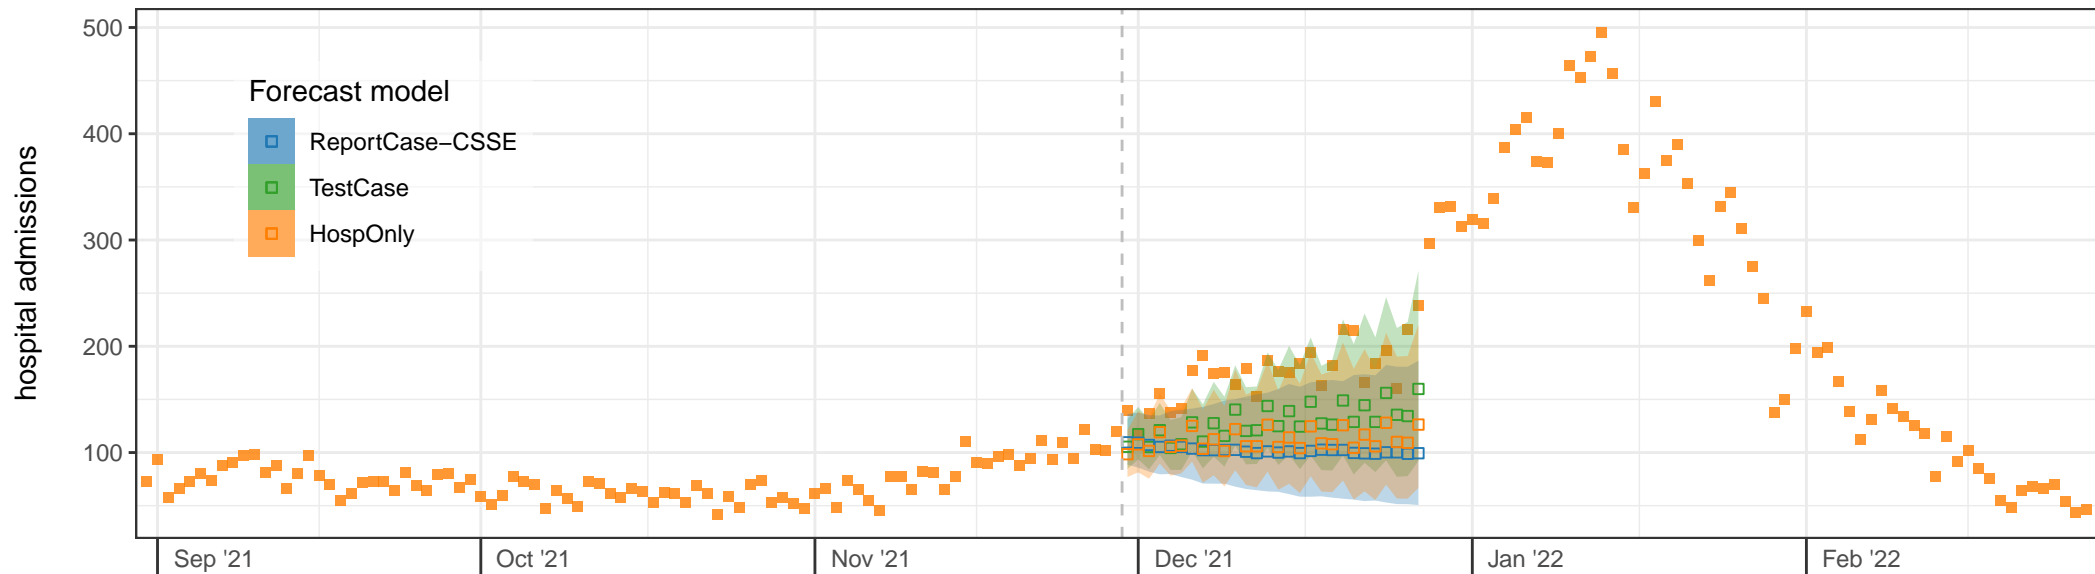

Massachusetts case data and forecasts: 2021-12-06

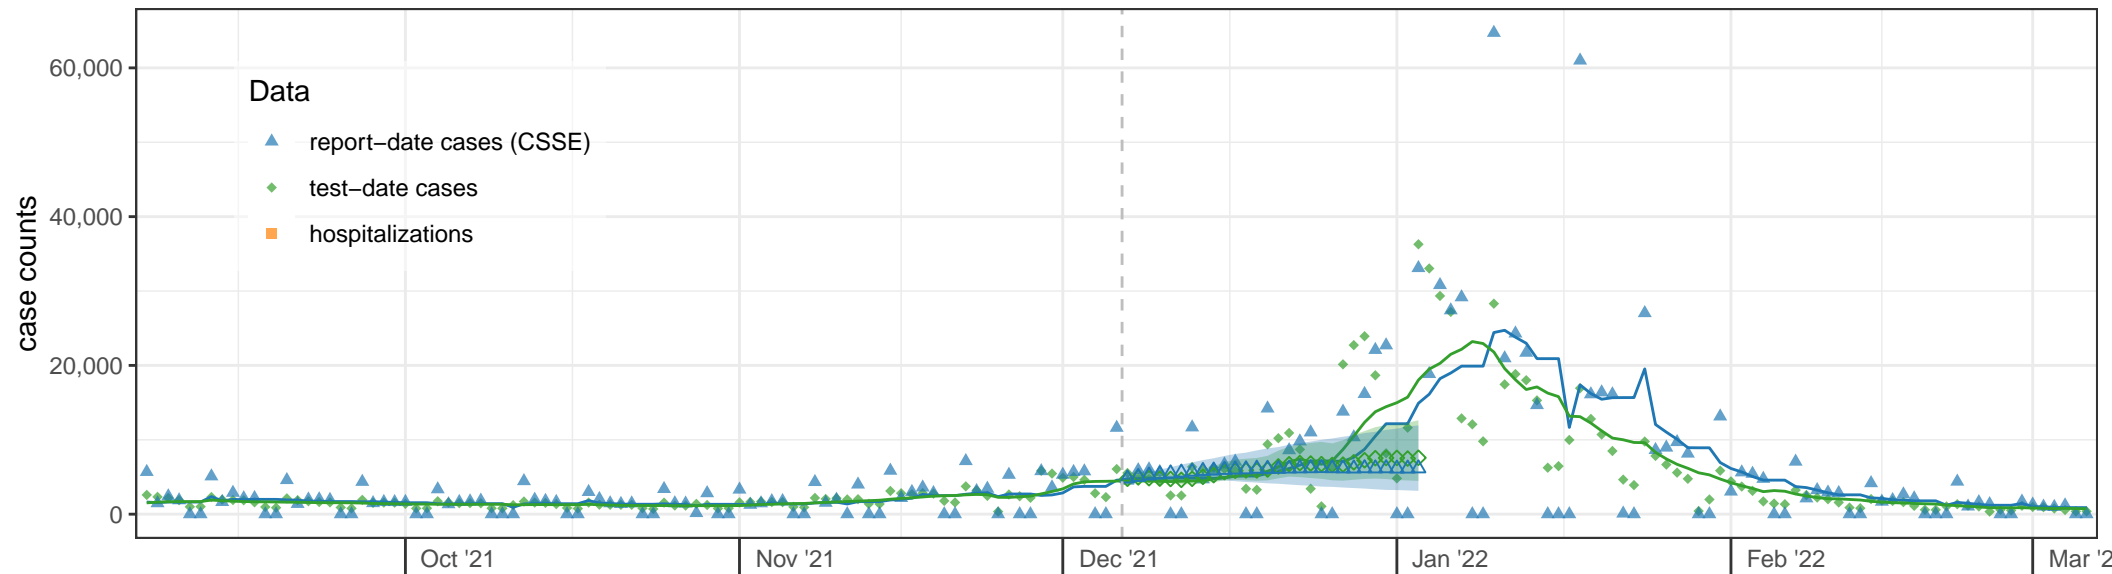

Massachusetts hospitalization data and forecasts: 2021-12-06

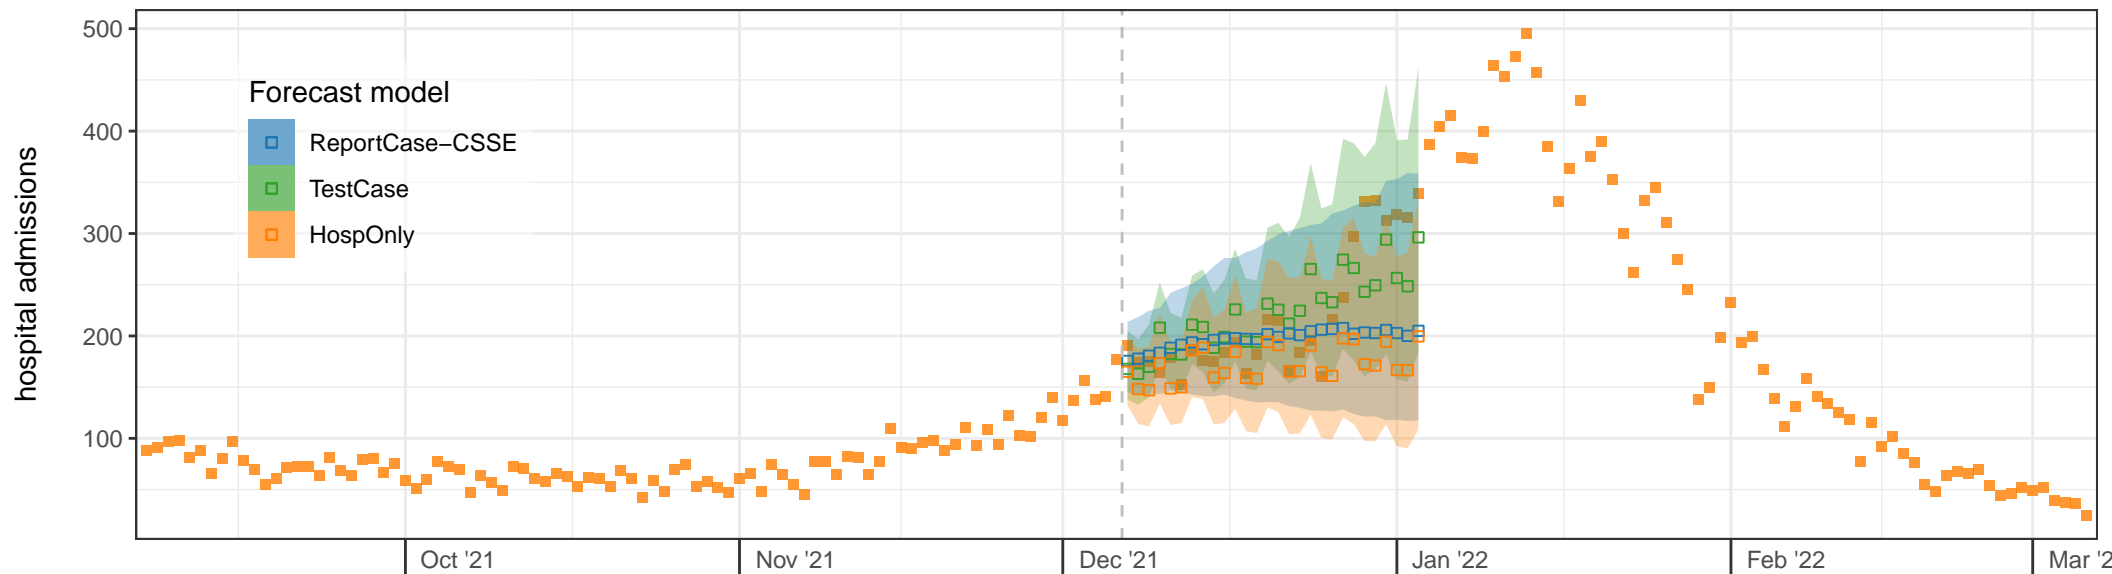

Massachusetts case data and forecasts: 2021-12-13

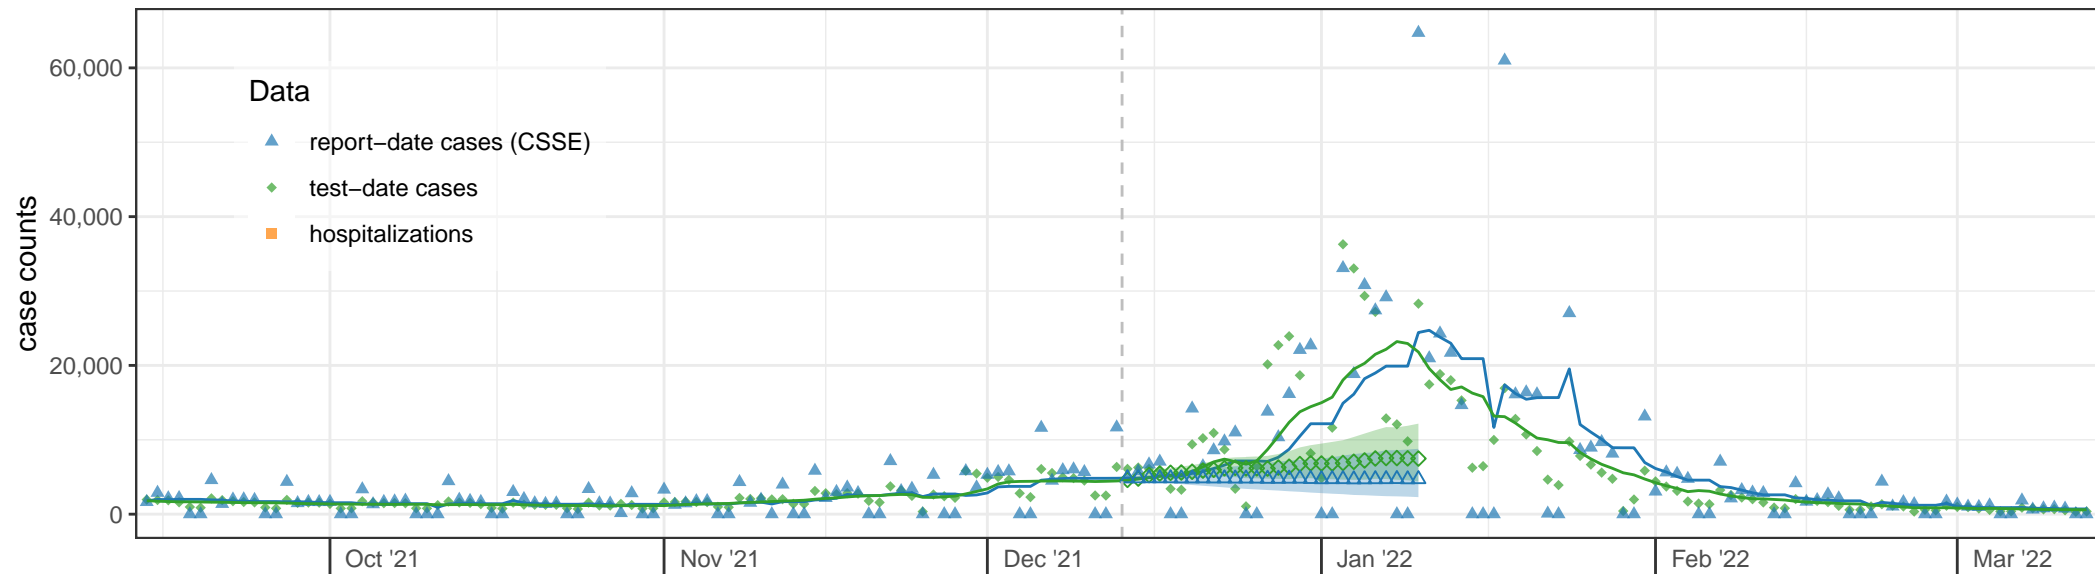

Massachusetts hospitalization data and forecasts: 2021-12-13

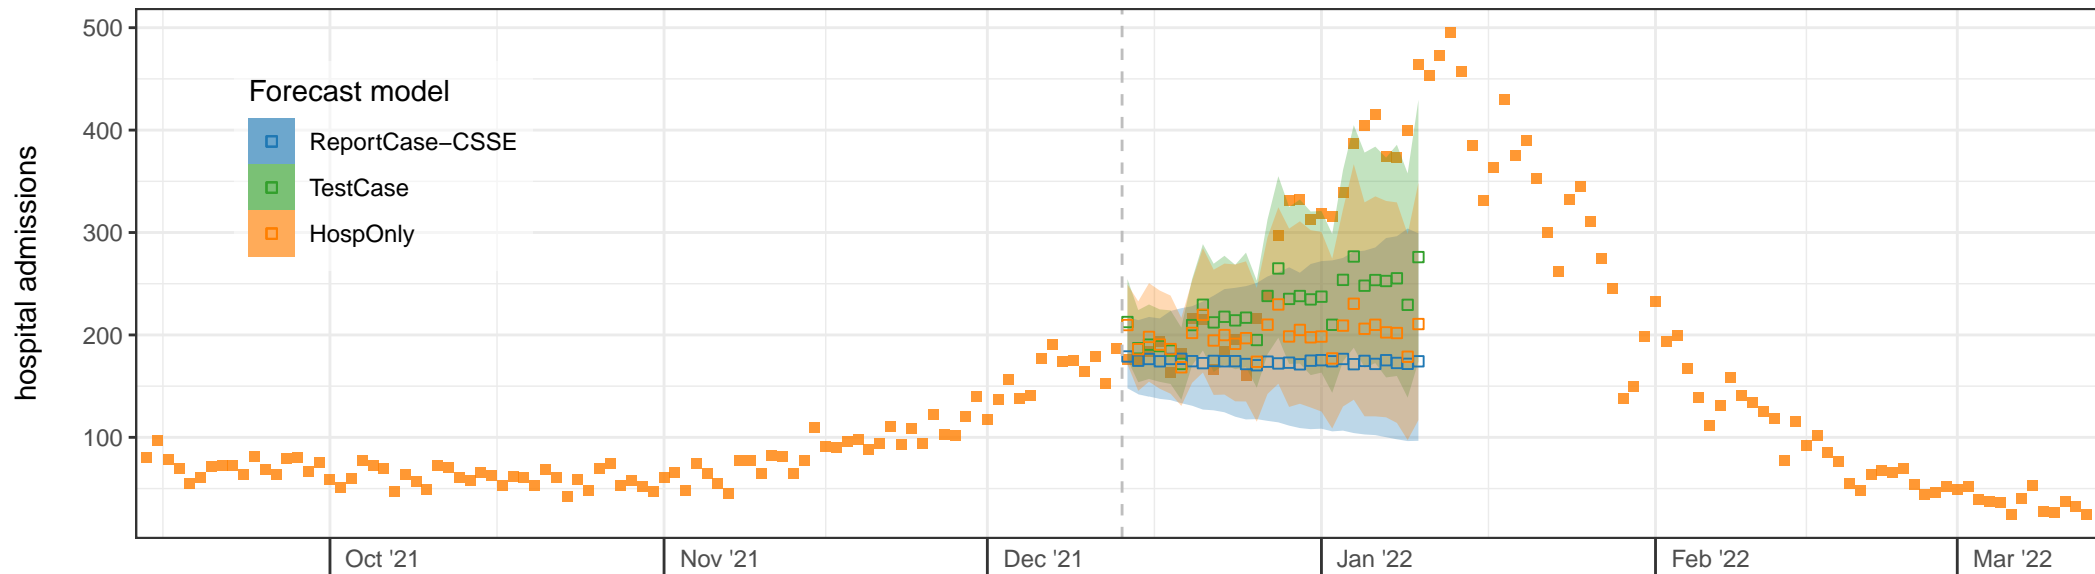

Massachusetts case data and forecasts: 2021-12-20

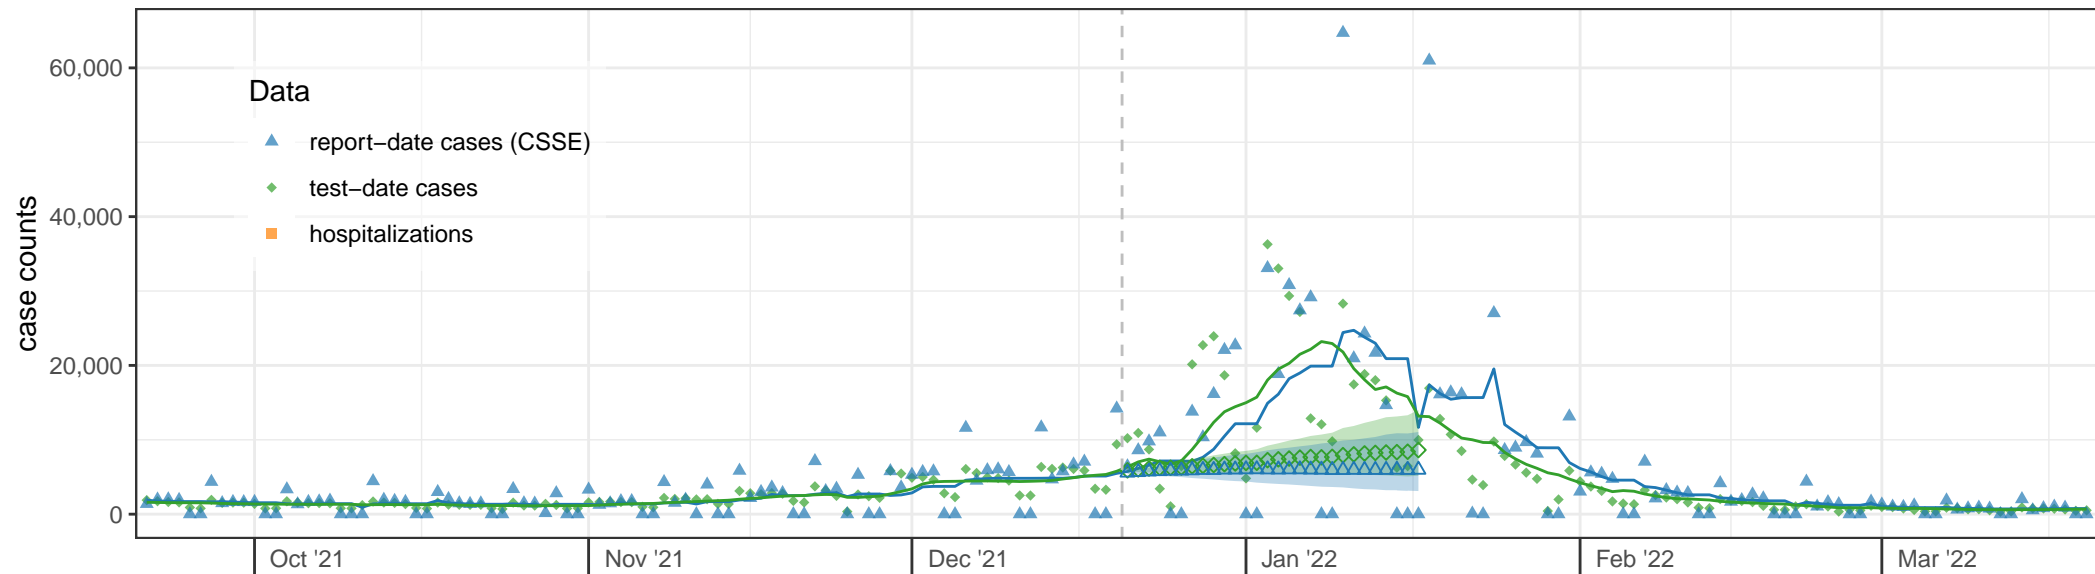

Massachusetts hospitalization data and forecasts: 2021-12-20

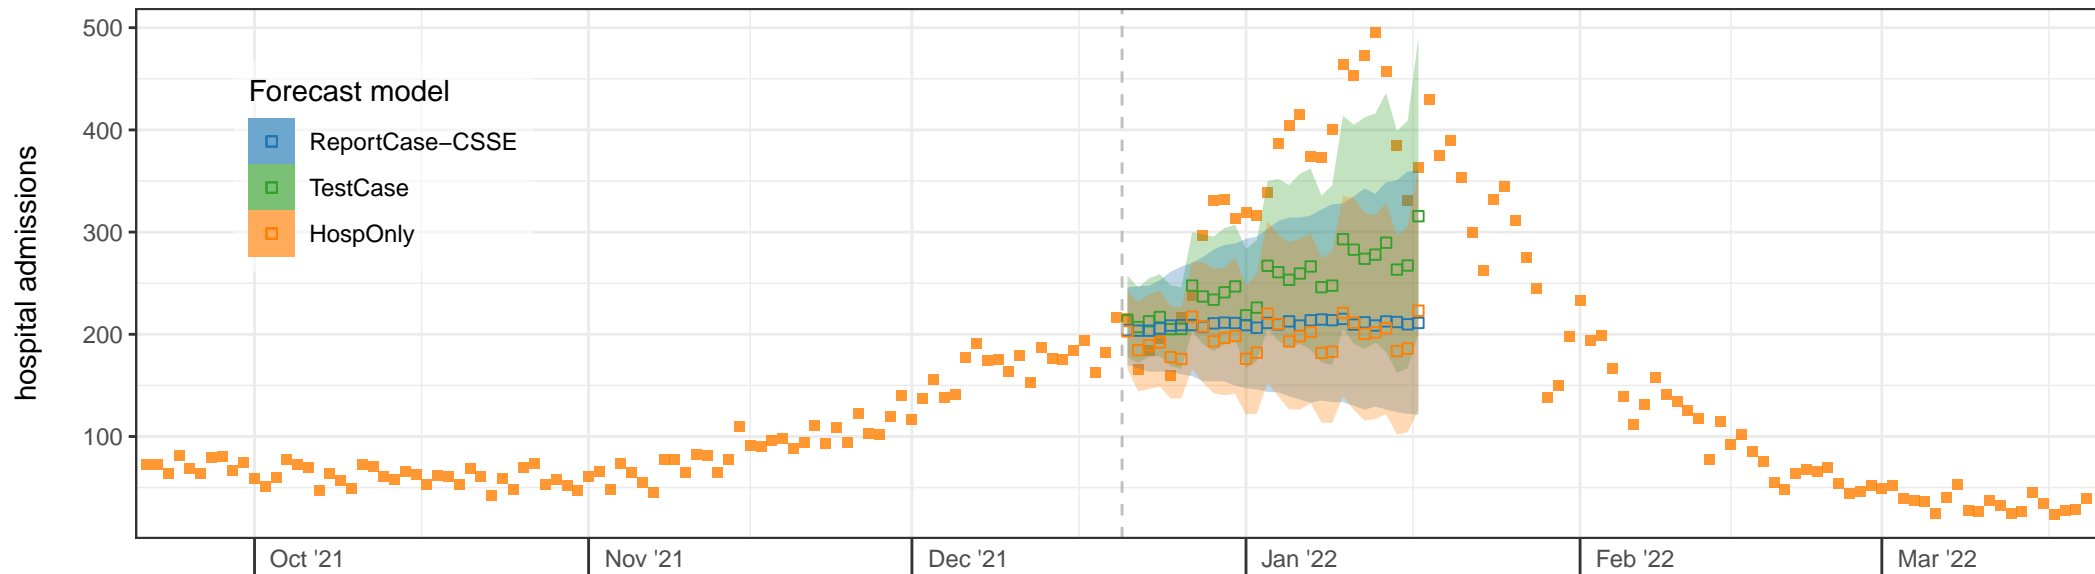

Massachusetts case data and forecasts: 2021-12-27

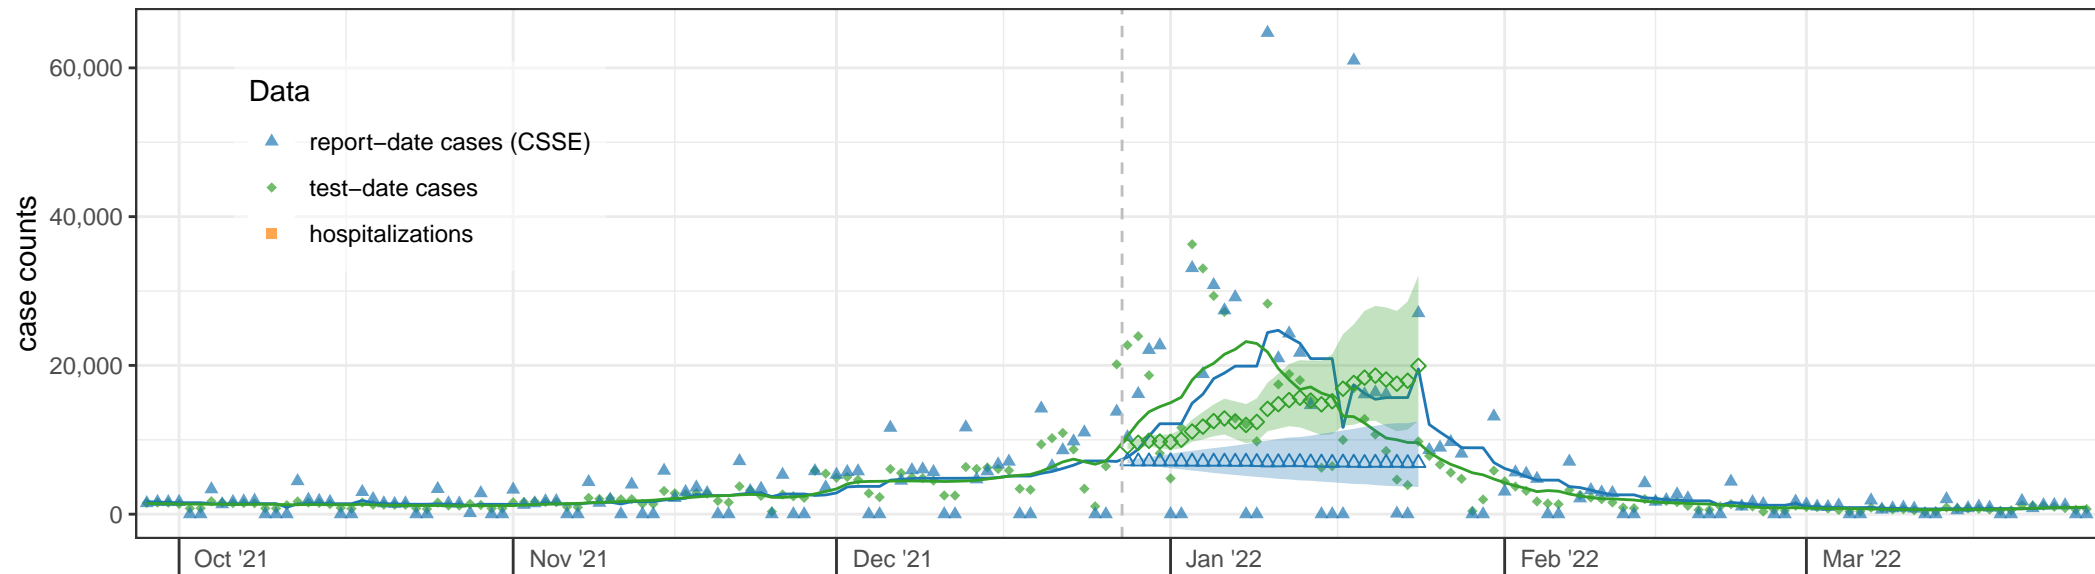

Massachusetts hospitalization data and forecasts: 2021-12-27

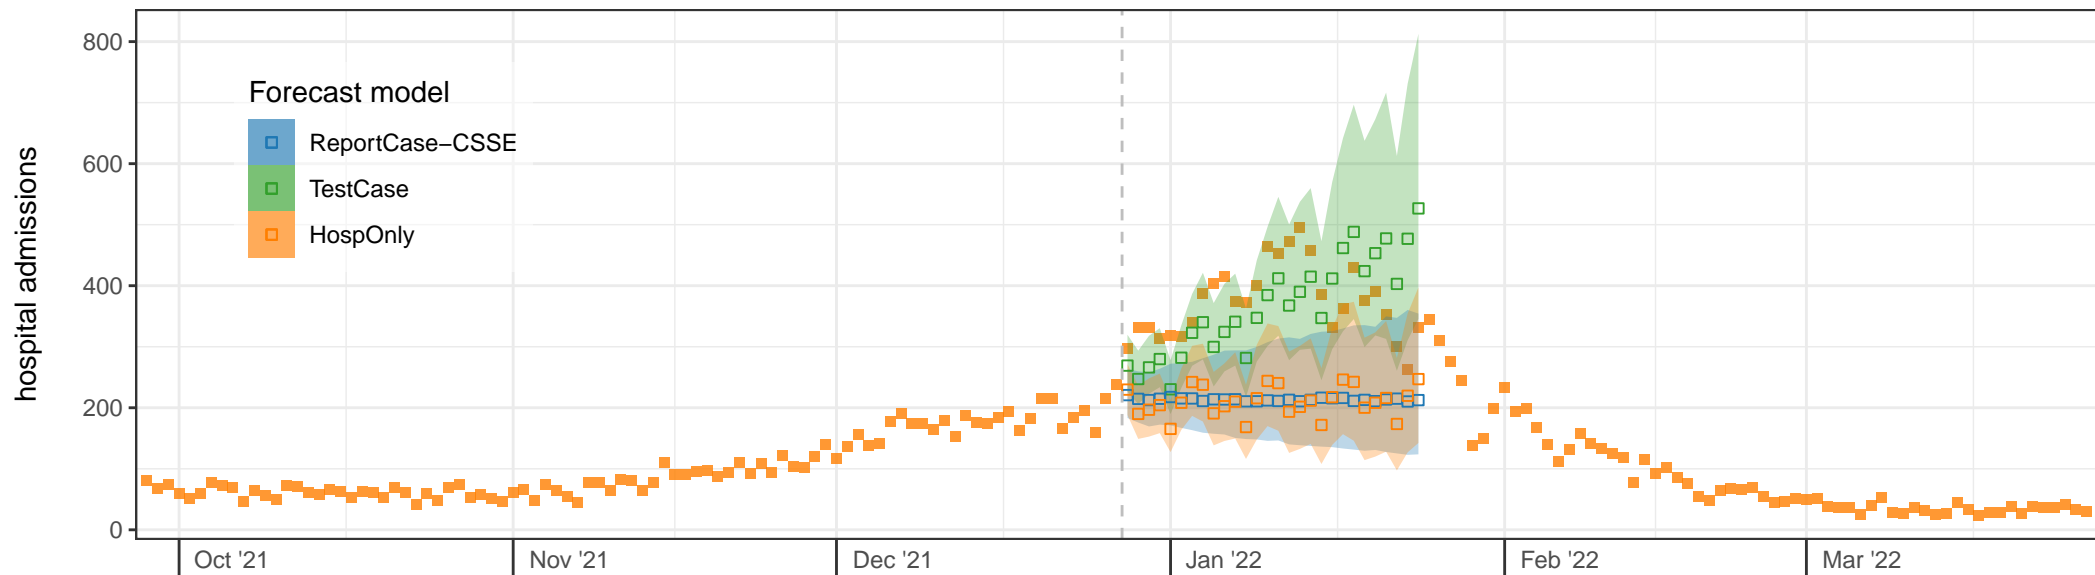

Massachusetts case data and forecasts: 2022-01-03

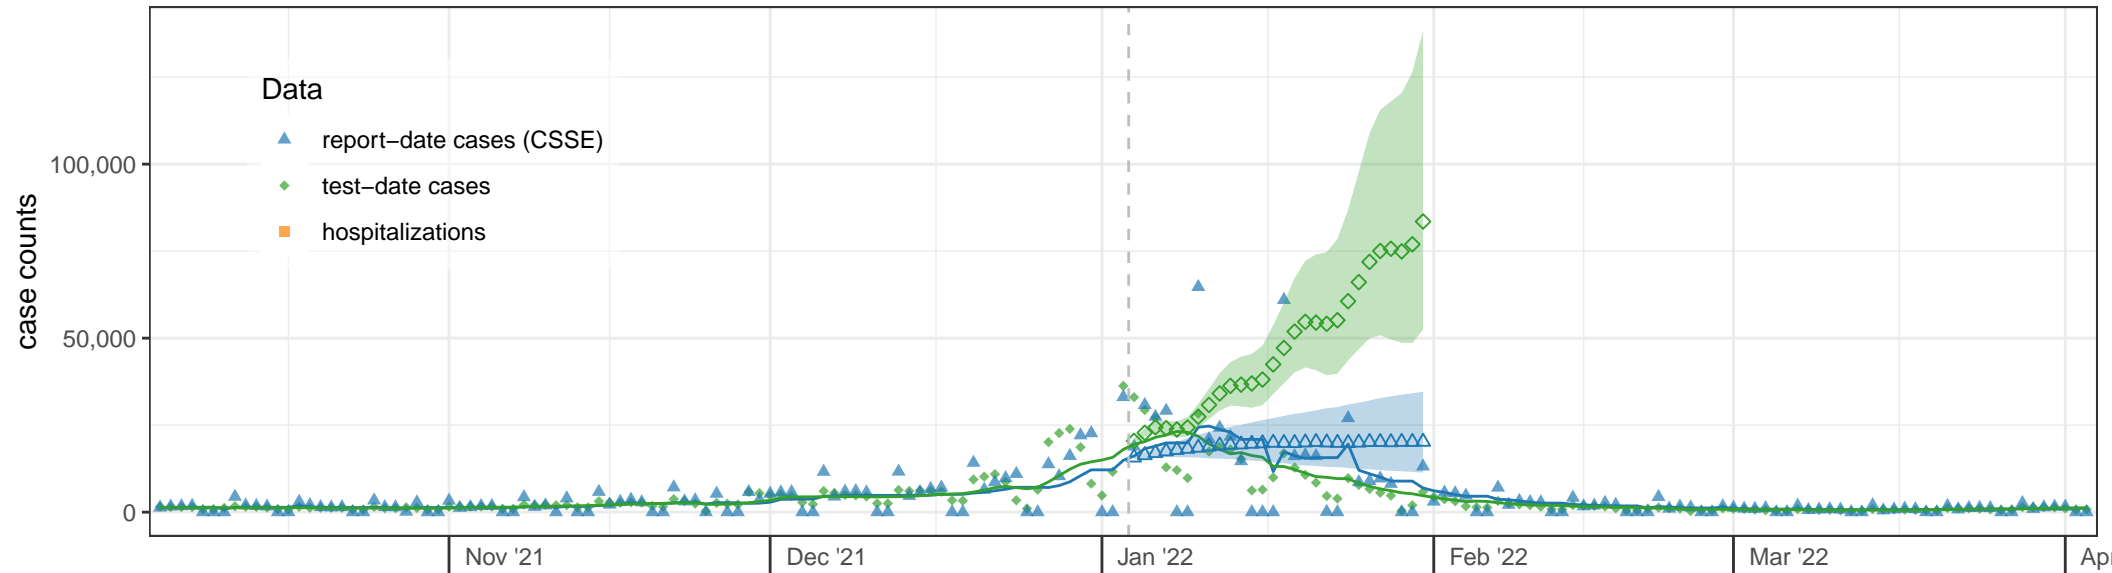

Massachusetts hospitalization data and forecasts: 2022-01-03

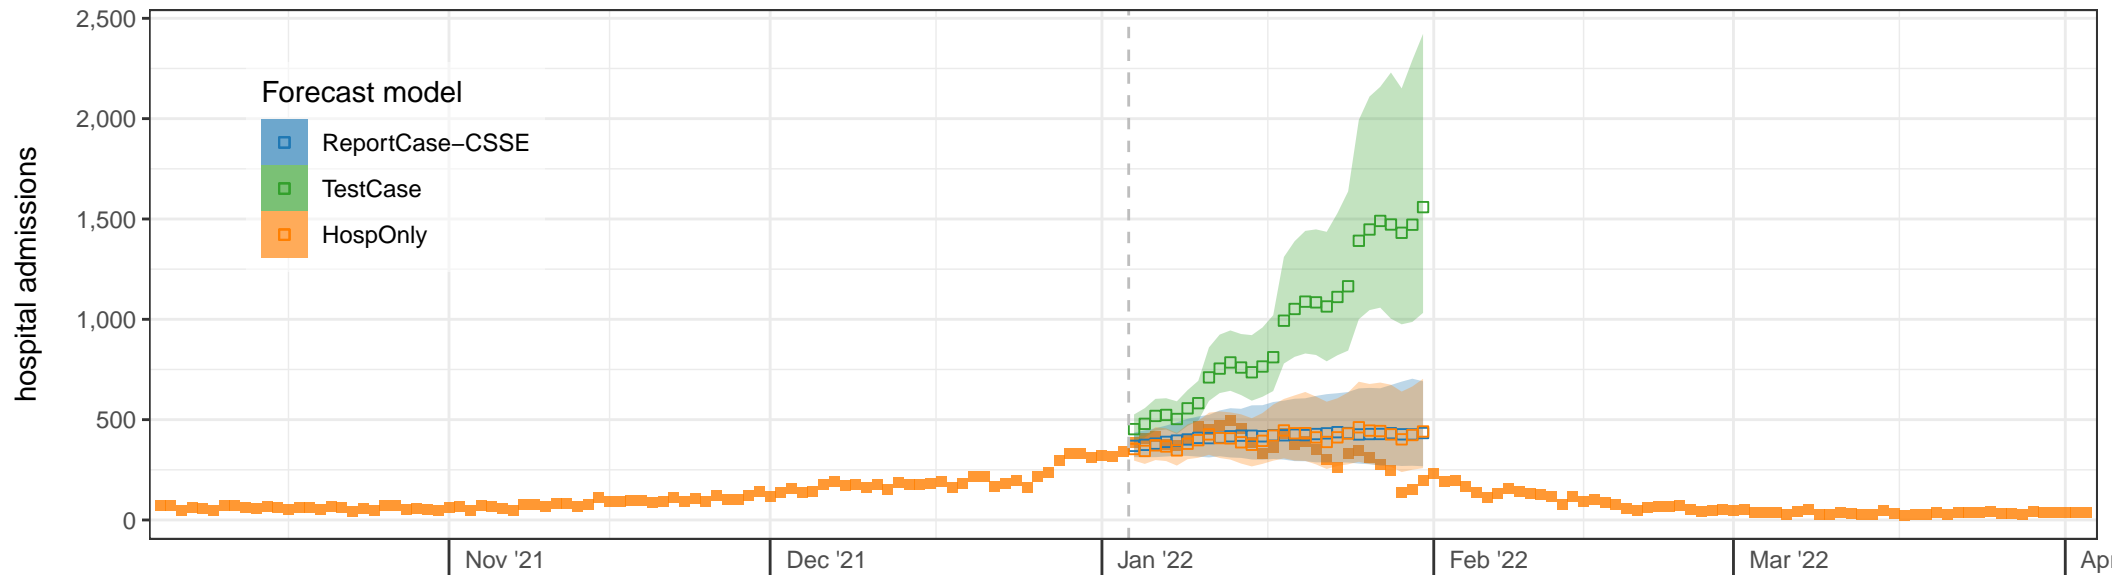

Massachusetts case data and forecasts: 2022-01-10

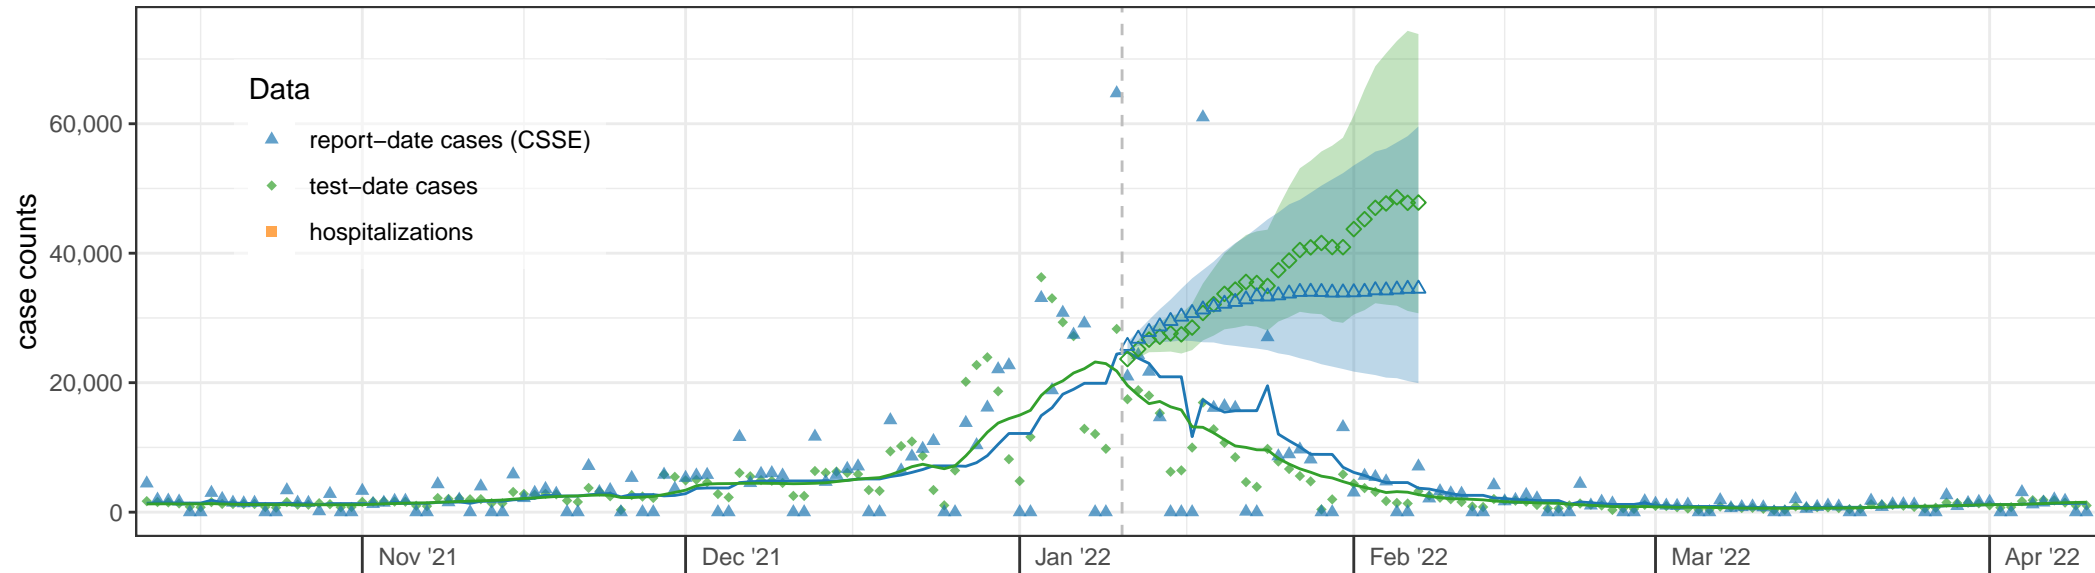

Massachusetts hospitalization data and forecasts: 2022-01-10

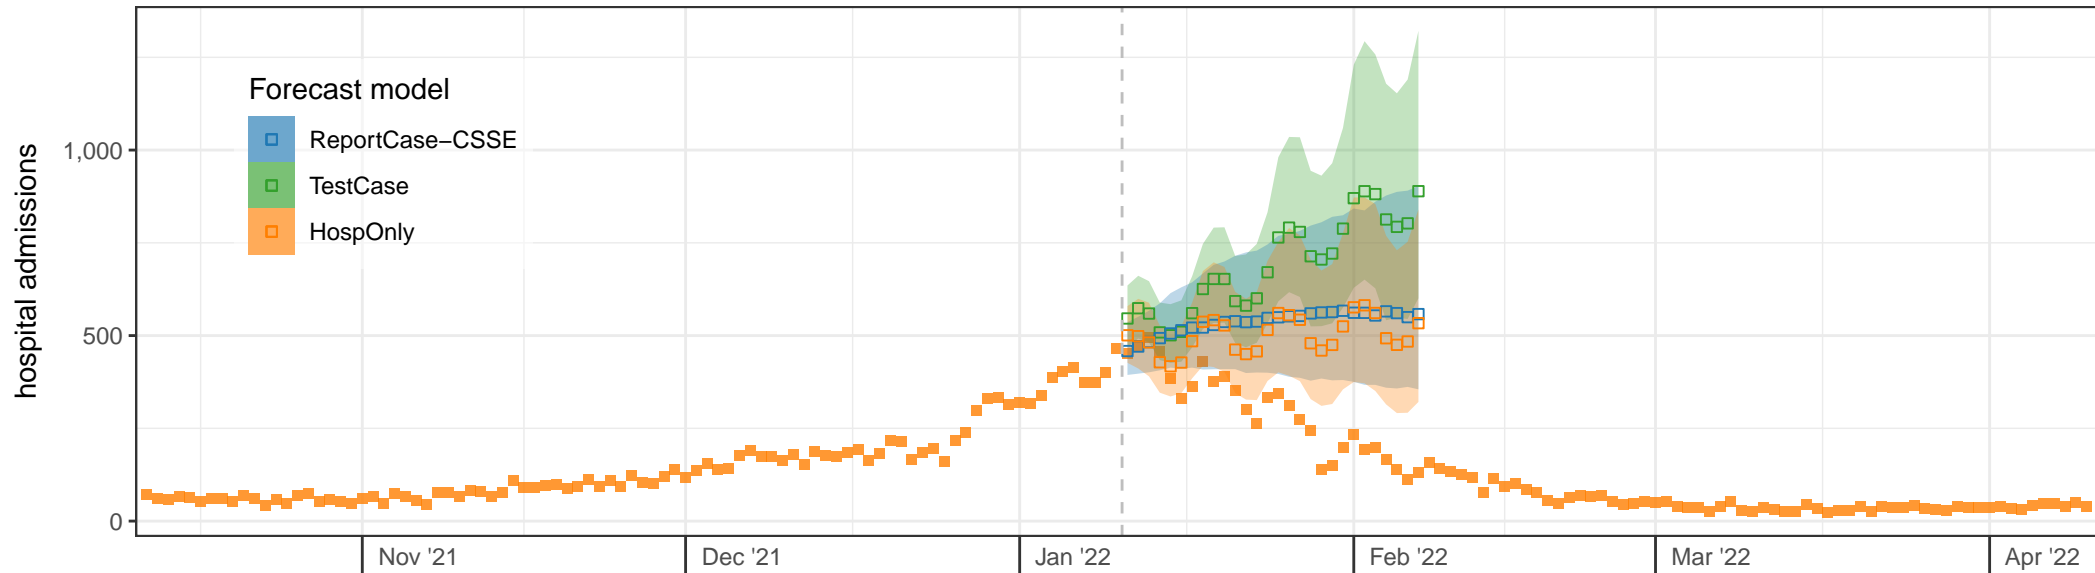



Massachusetts case data and forecasts: 2022-01-17

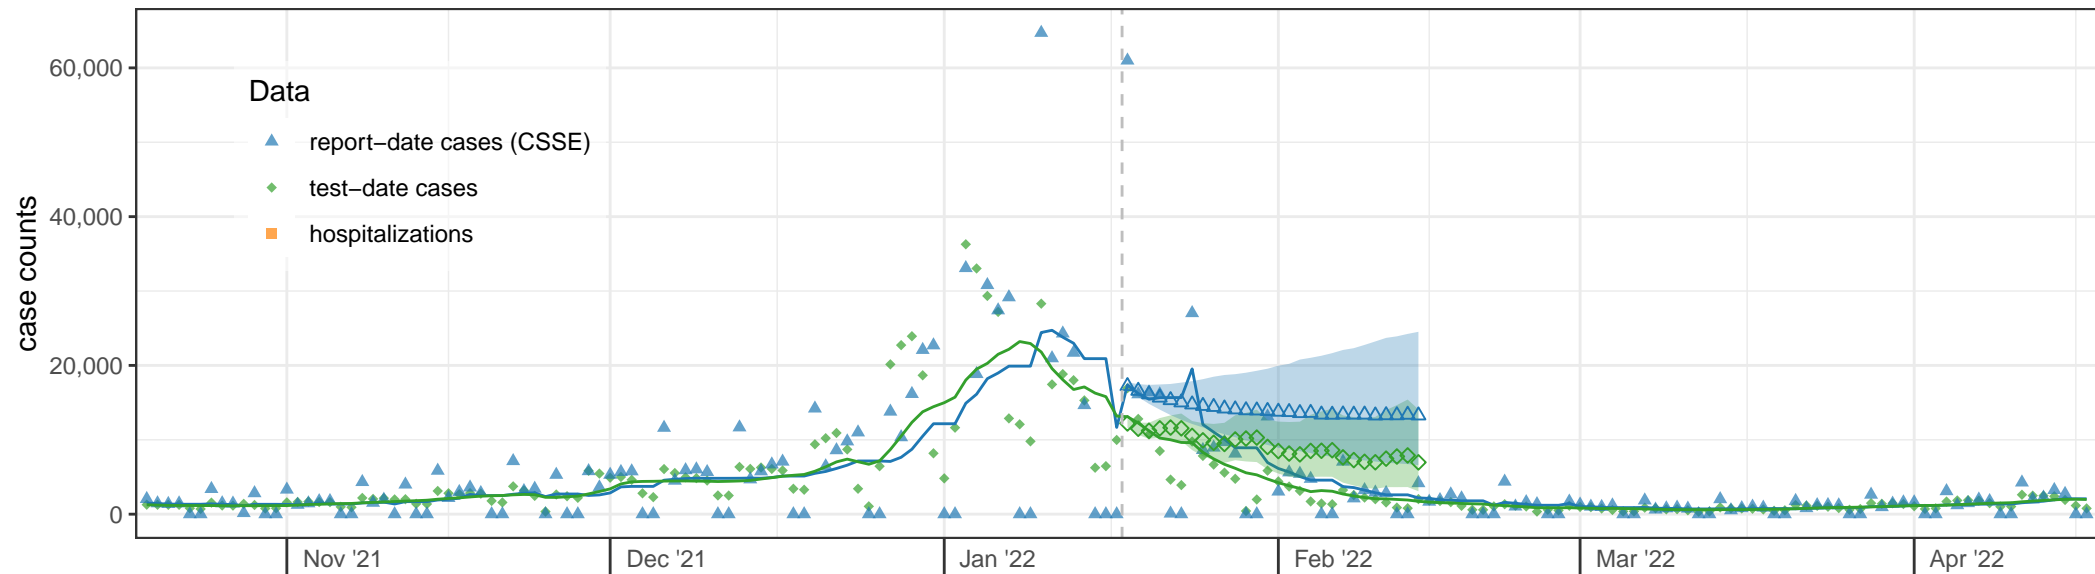

Massachusetts hospitalization data and forecasts: 2022-01-17

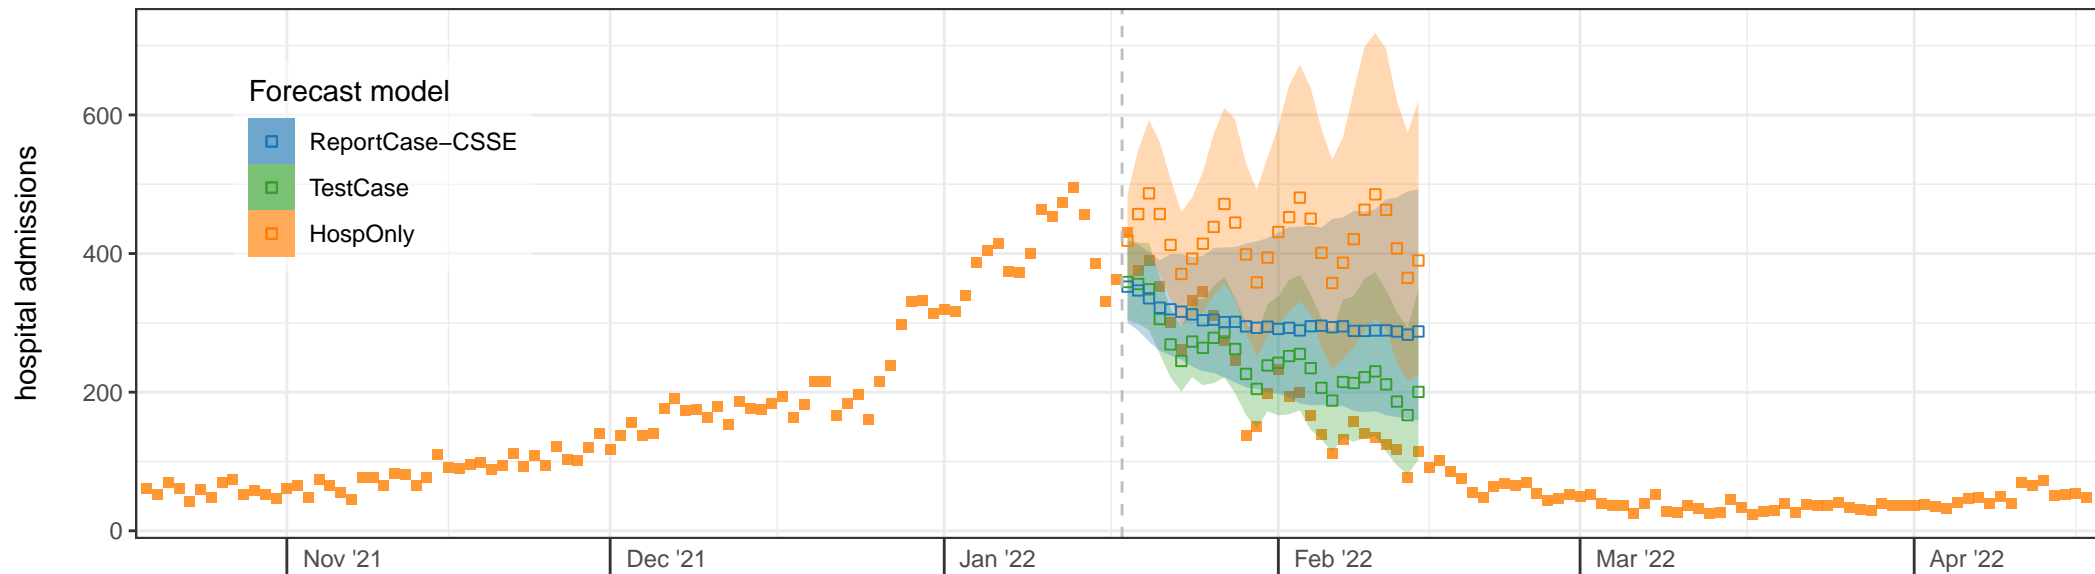

Massachusetts case data and forecasts: 2022-01-24

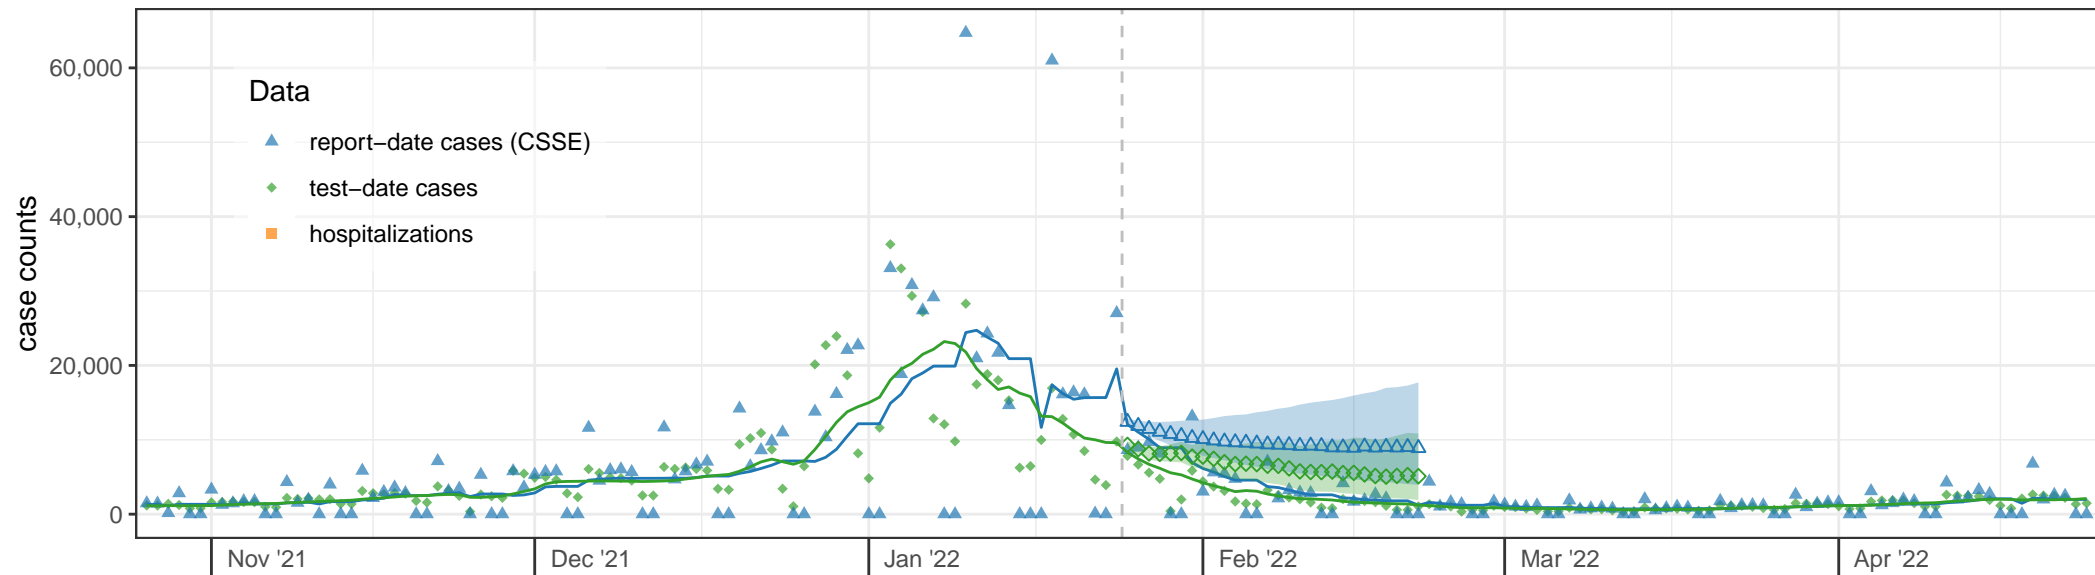

Massachusetts hospitalization data and forecasts: 2022-01-24

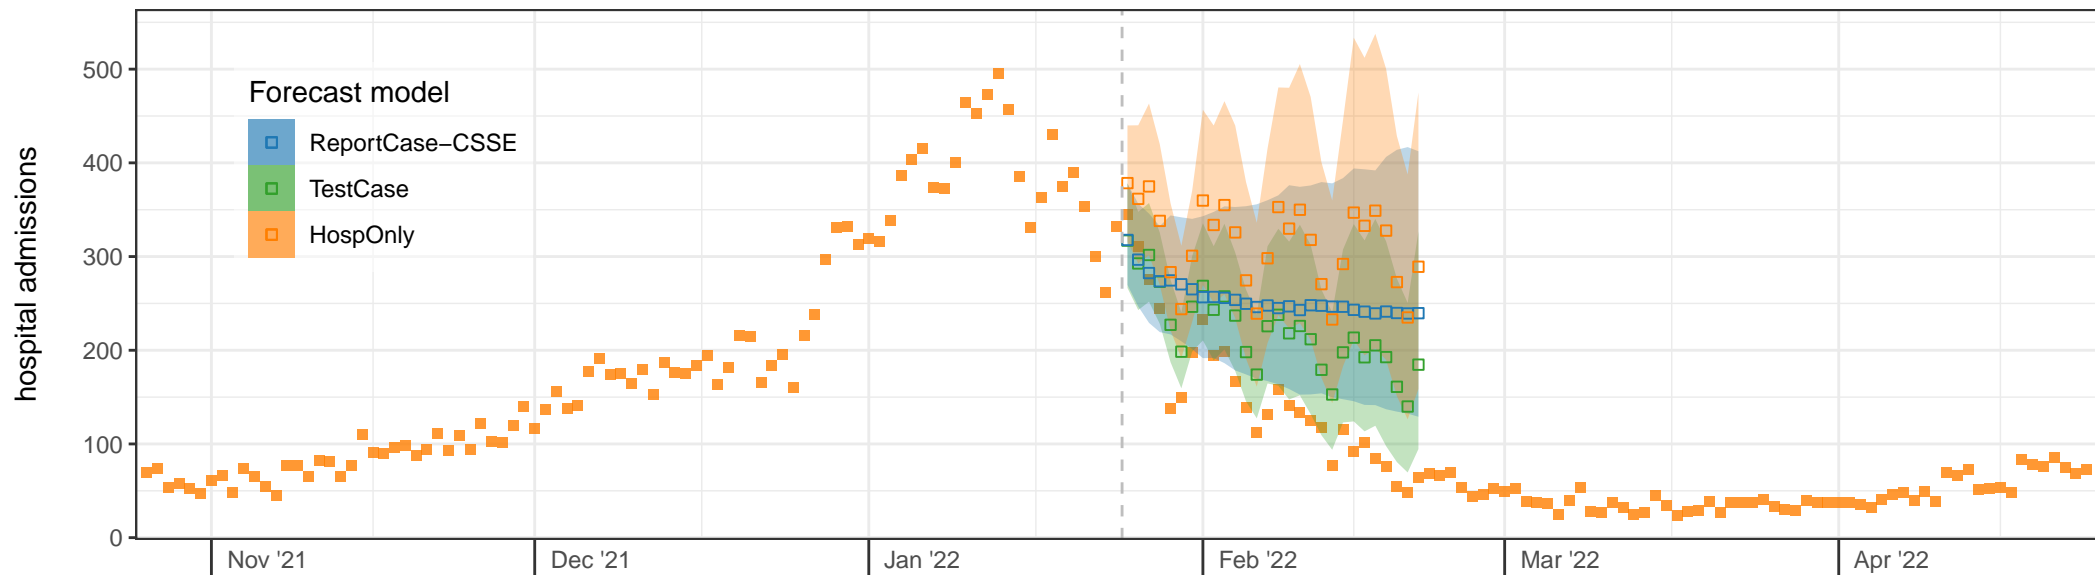

Massachusetts case data and forecasts: 2022-01-31

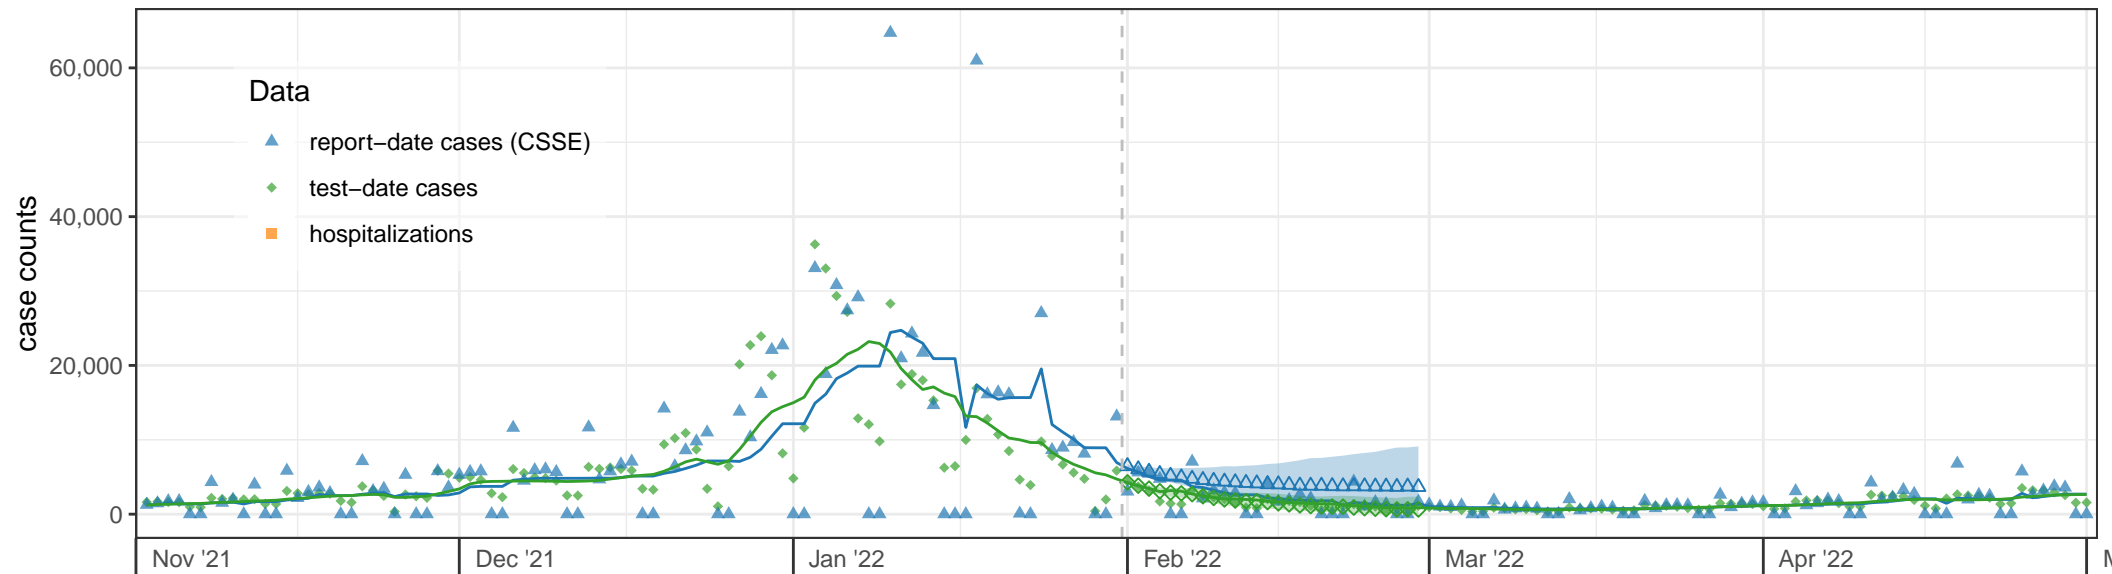

Massachusetts hospitalization data and forecasts: 2022-01-31

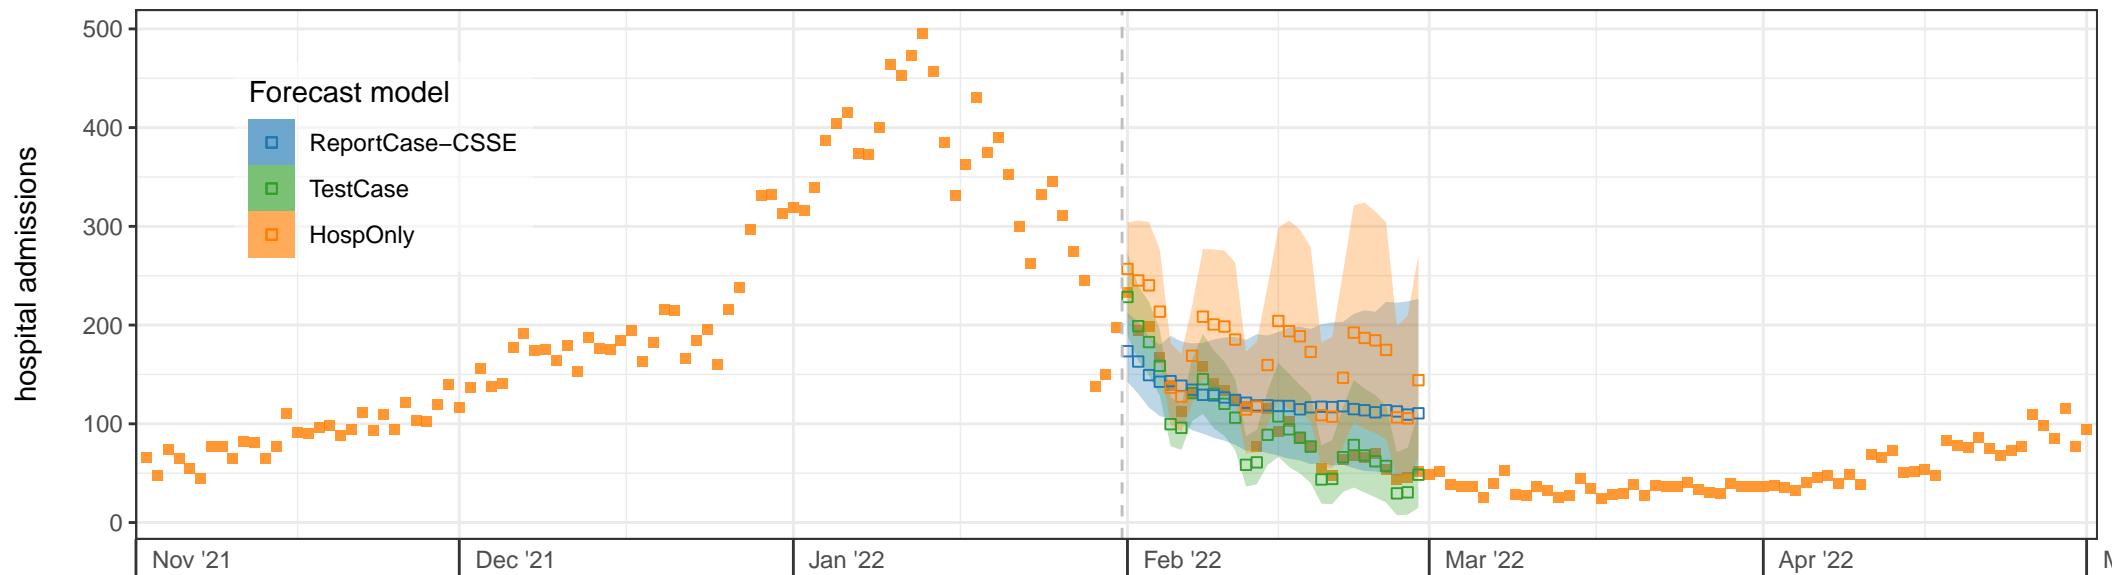

Massachusetts case data and forecasts: 2022-02-07

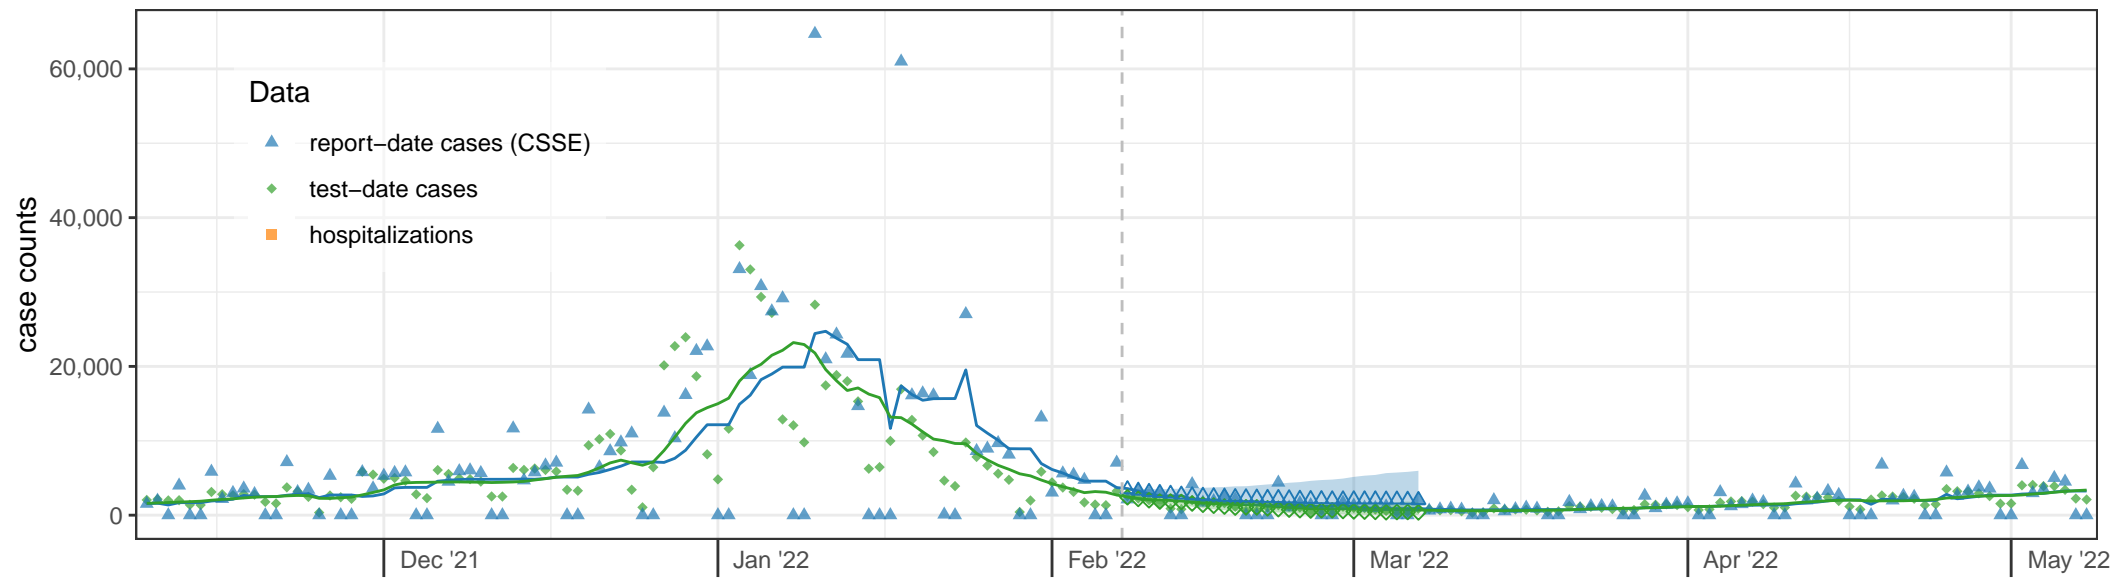

Massachusetts hospitalization data and forecasts: 2022-02-07

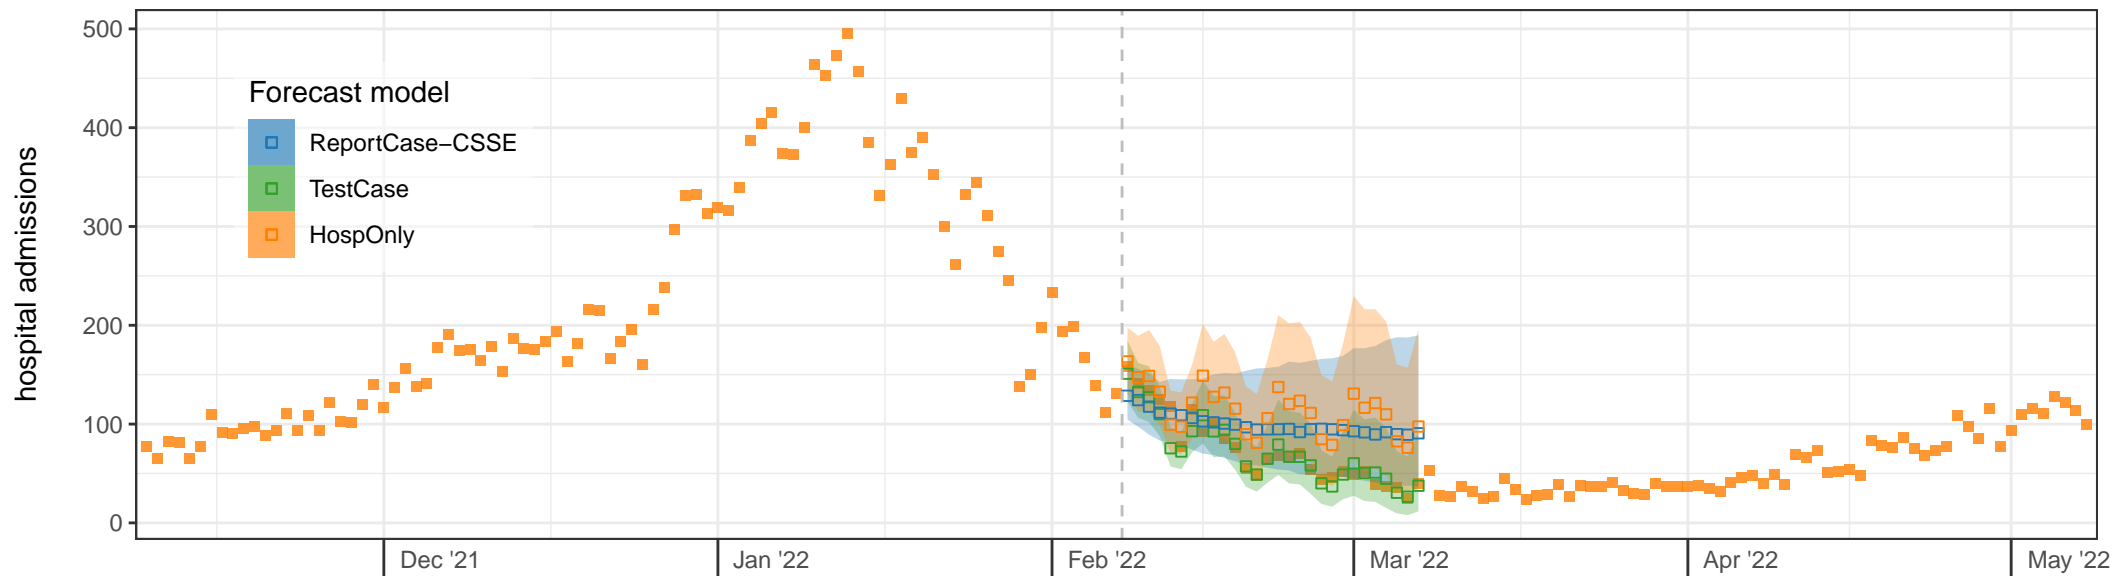

Massachusetts case data and forecasts: 2022-02-14

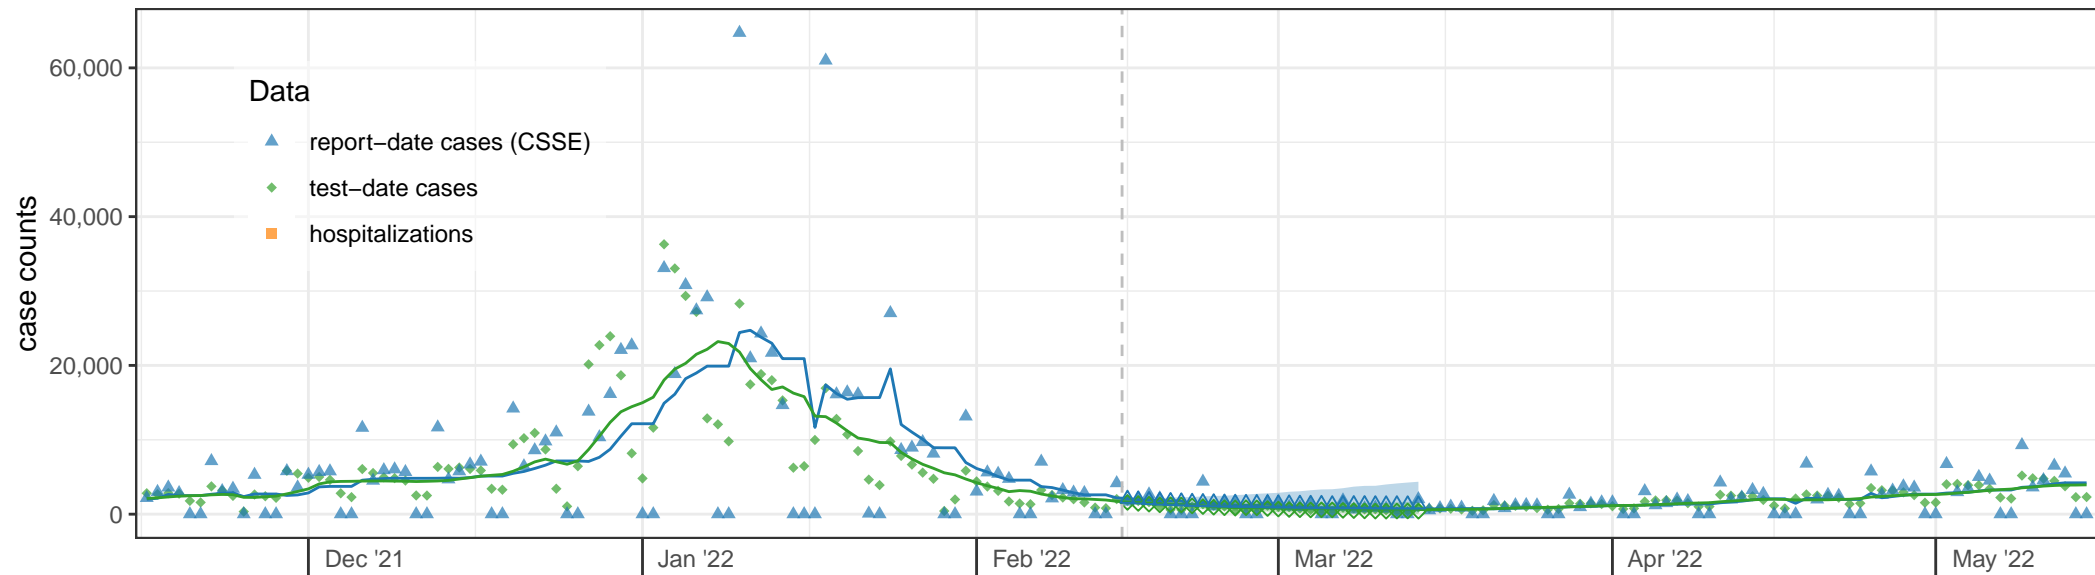

Massachusetts hospitalization data and forecasts: 2022-02-14

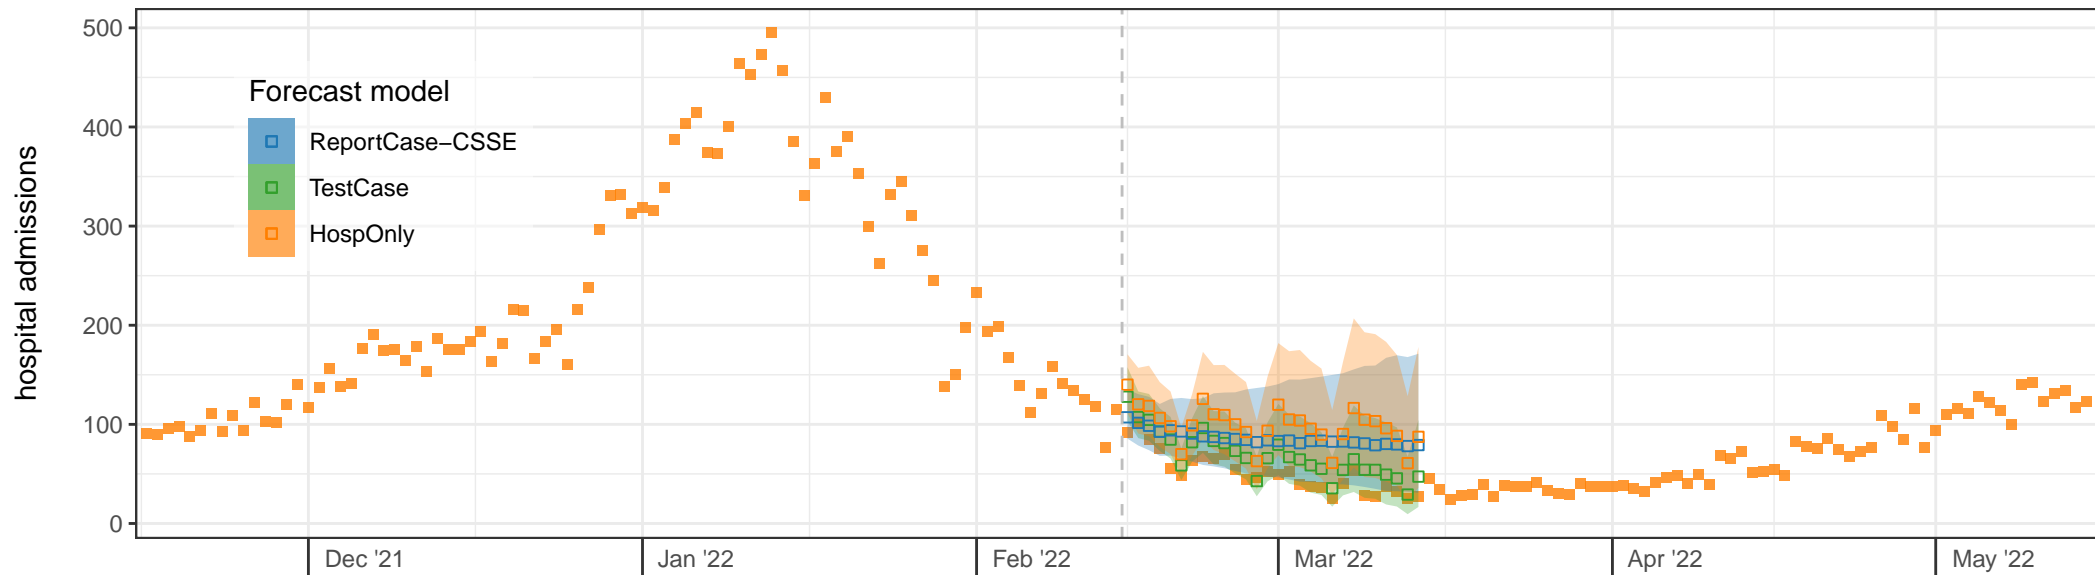

Massachusetts case data and forecasts: 2022-02-21

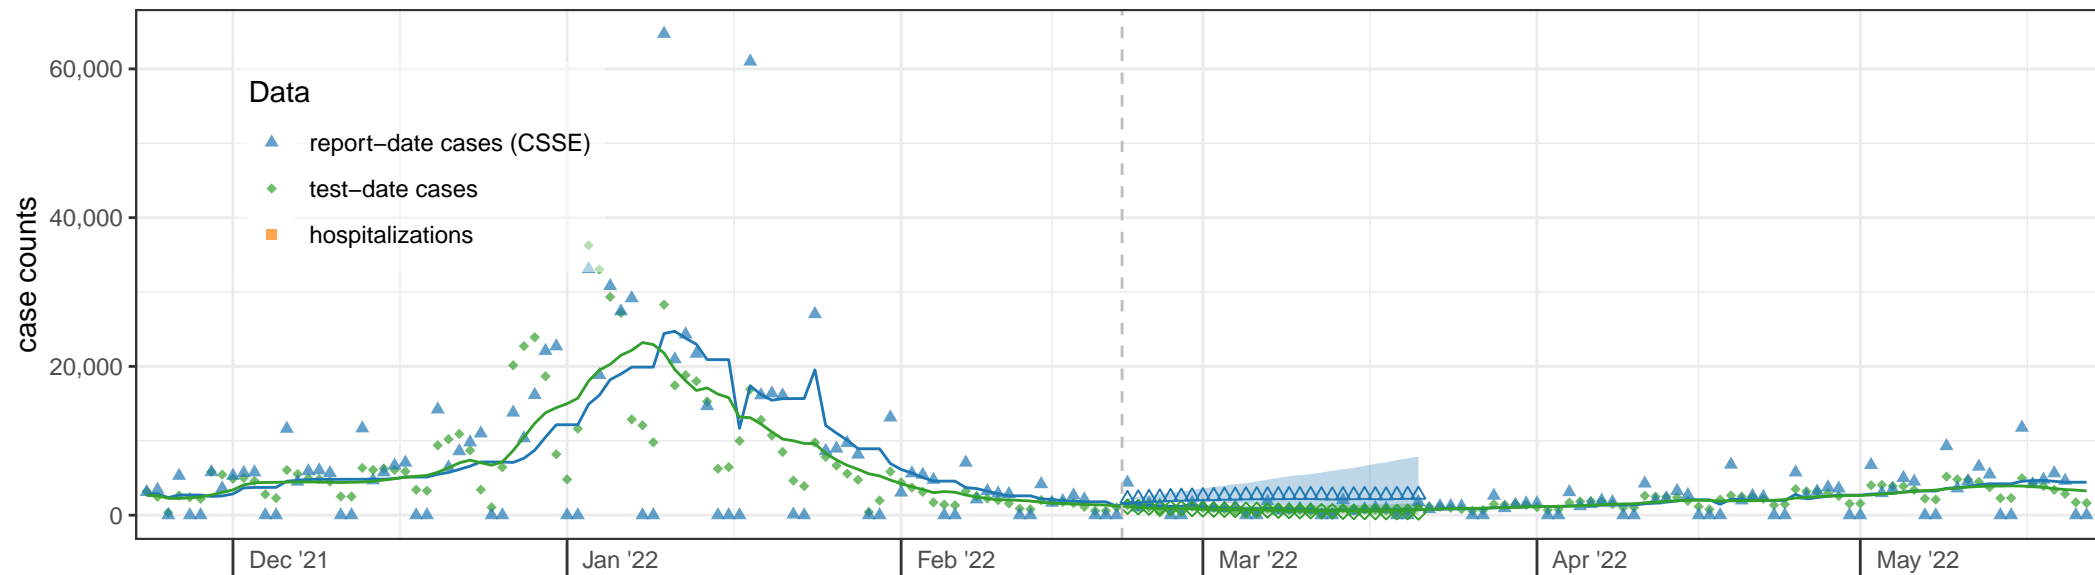

Massachusetts hospitalization data and forecasts: 2022-02-21

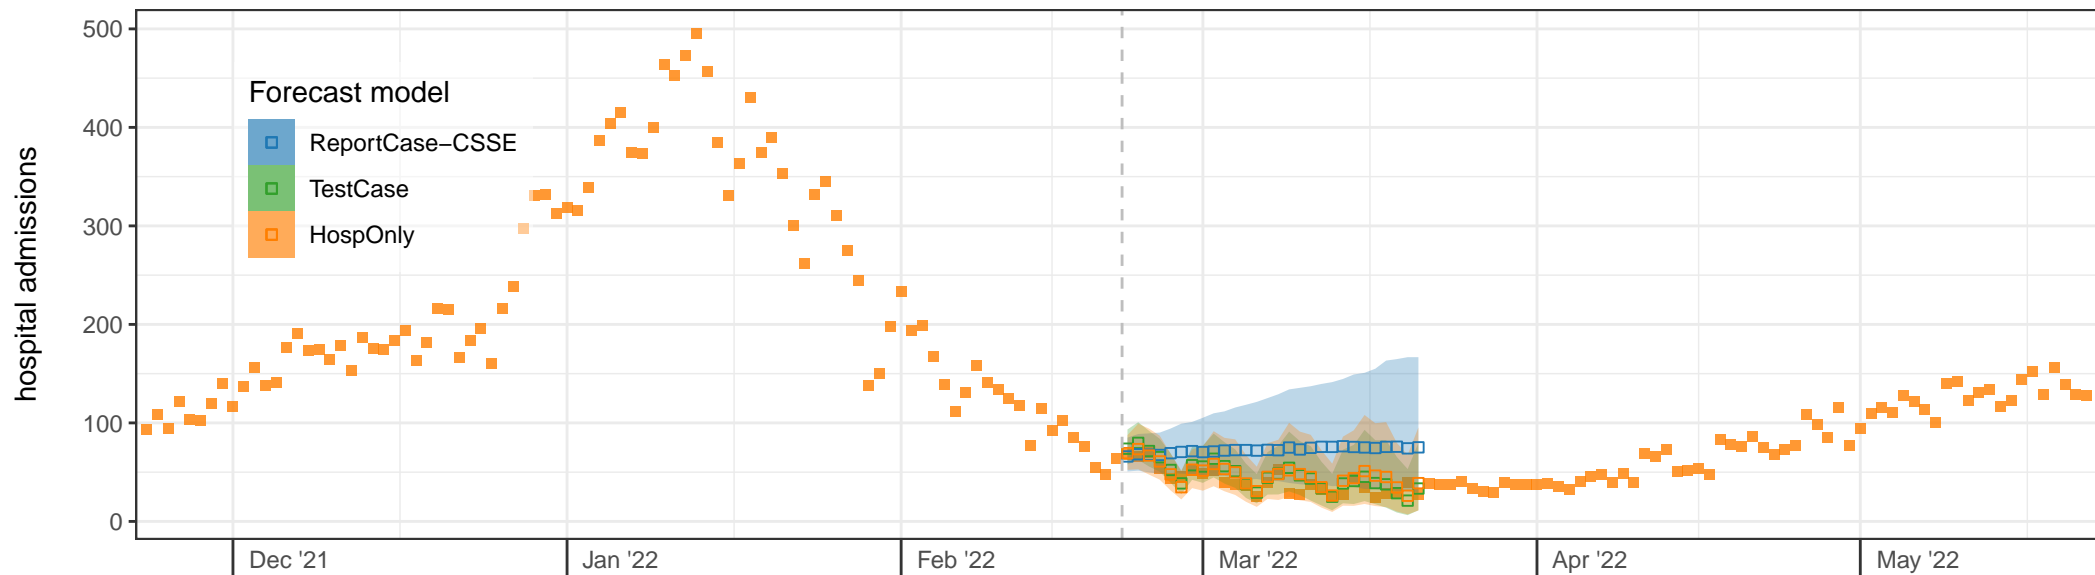

Massachusetts case data and forecasts: 2022-02-28

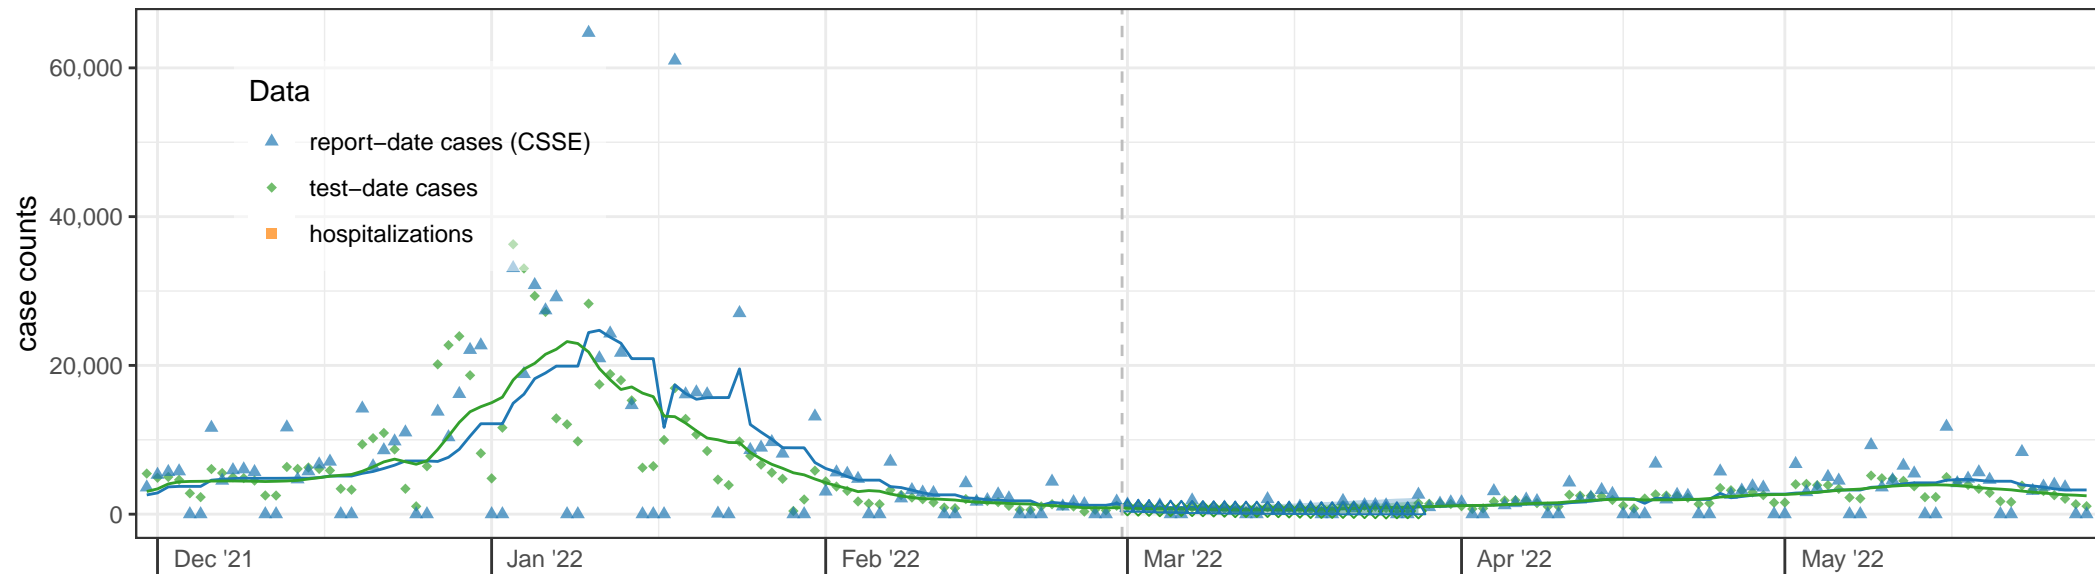

Massachusetts hospitalization data and forecasts: 2022-02-28

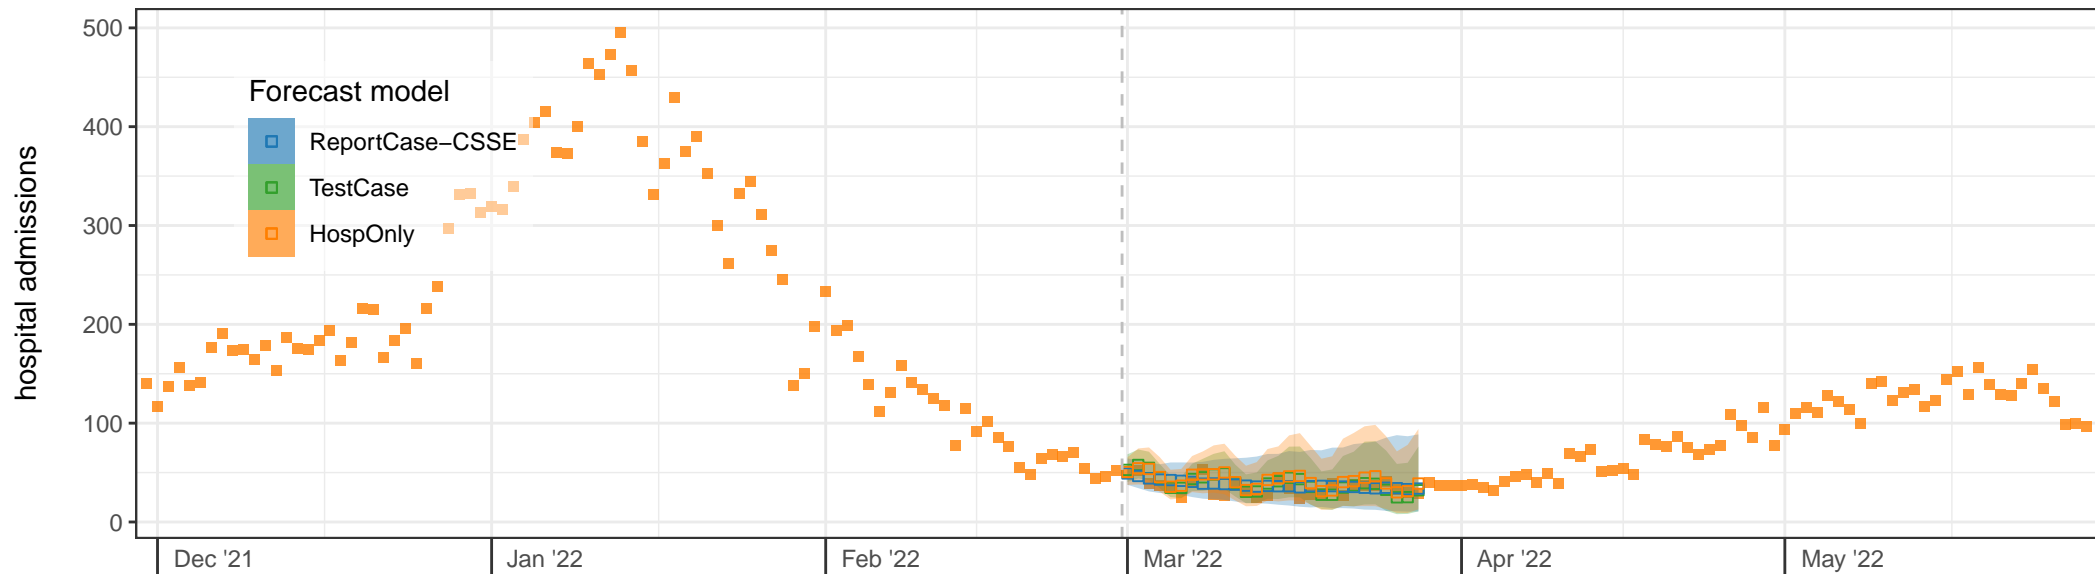

Massachusetts case data and forecasts: 2022-03-07

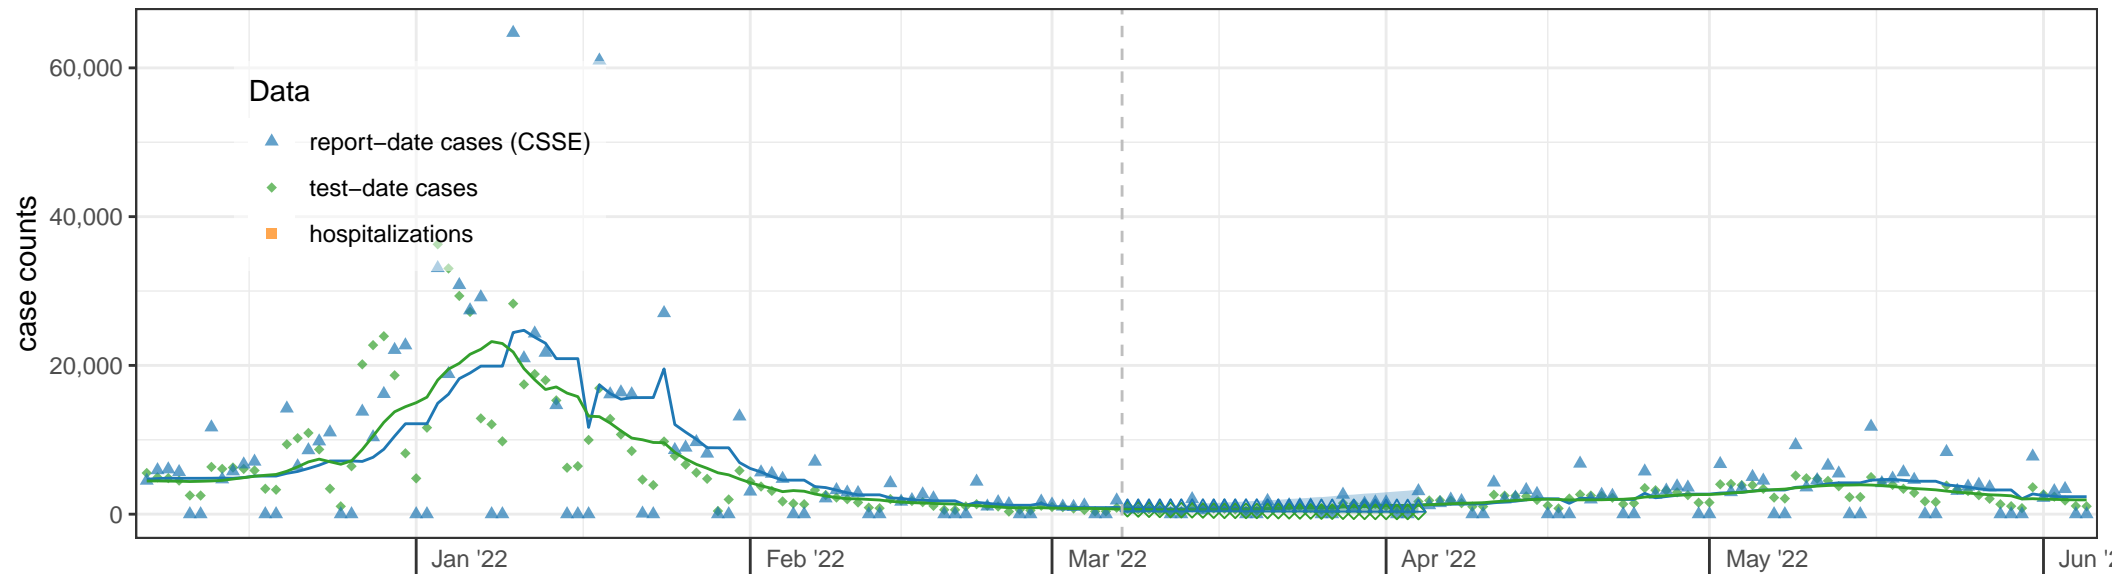

Massachusetts hospitalization data and forecasts: 2022-03-07

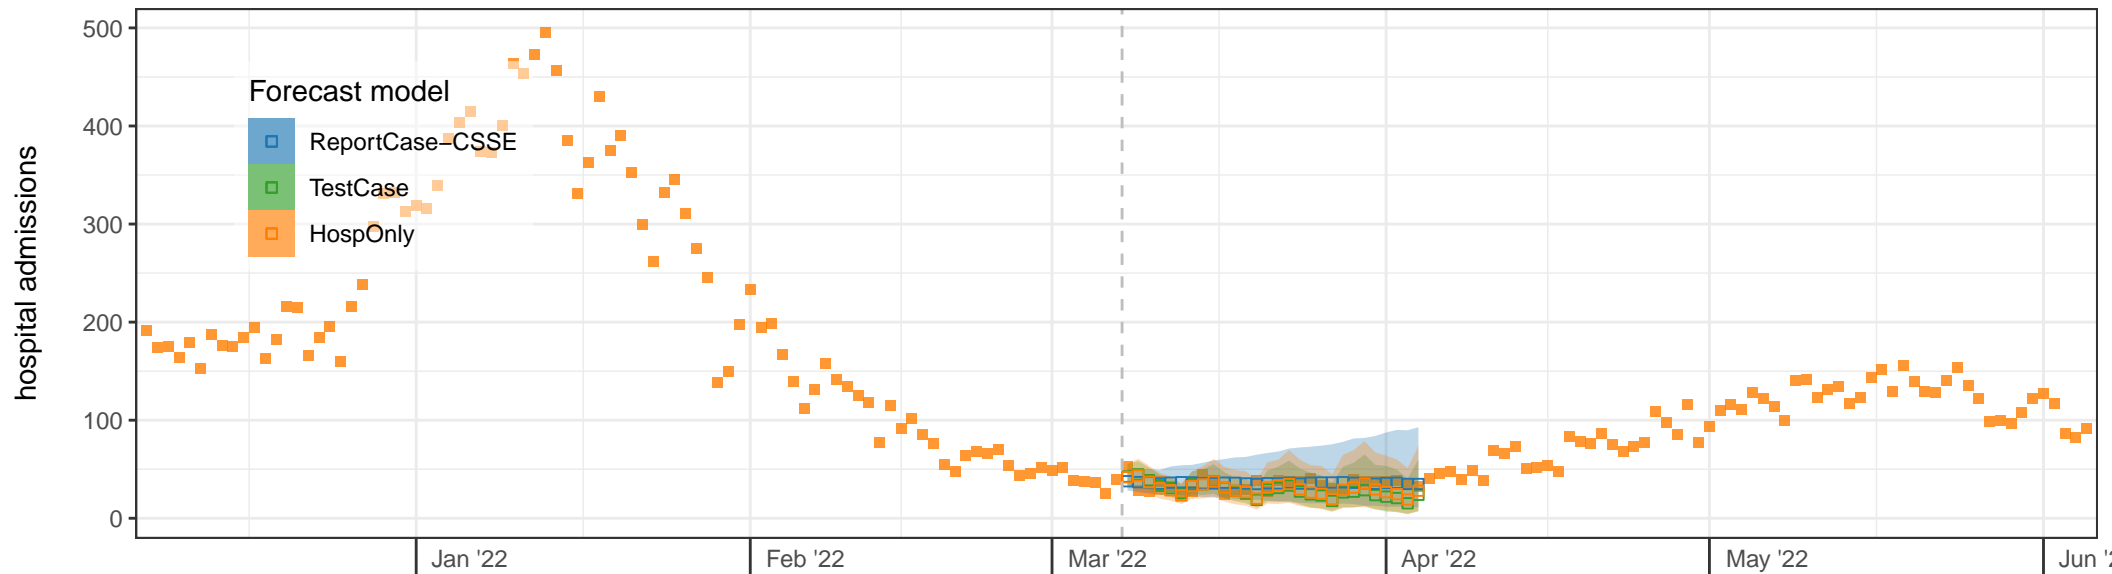



Massachusetts case data and forecasts: 2022-03-14

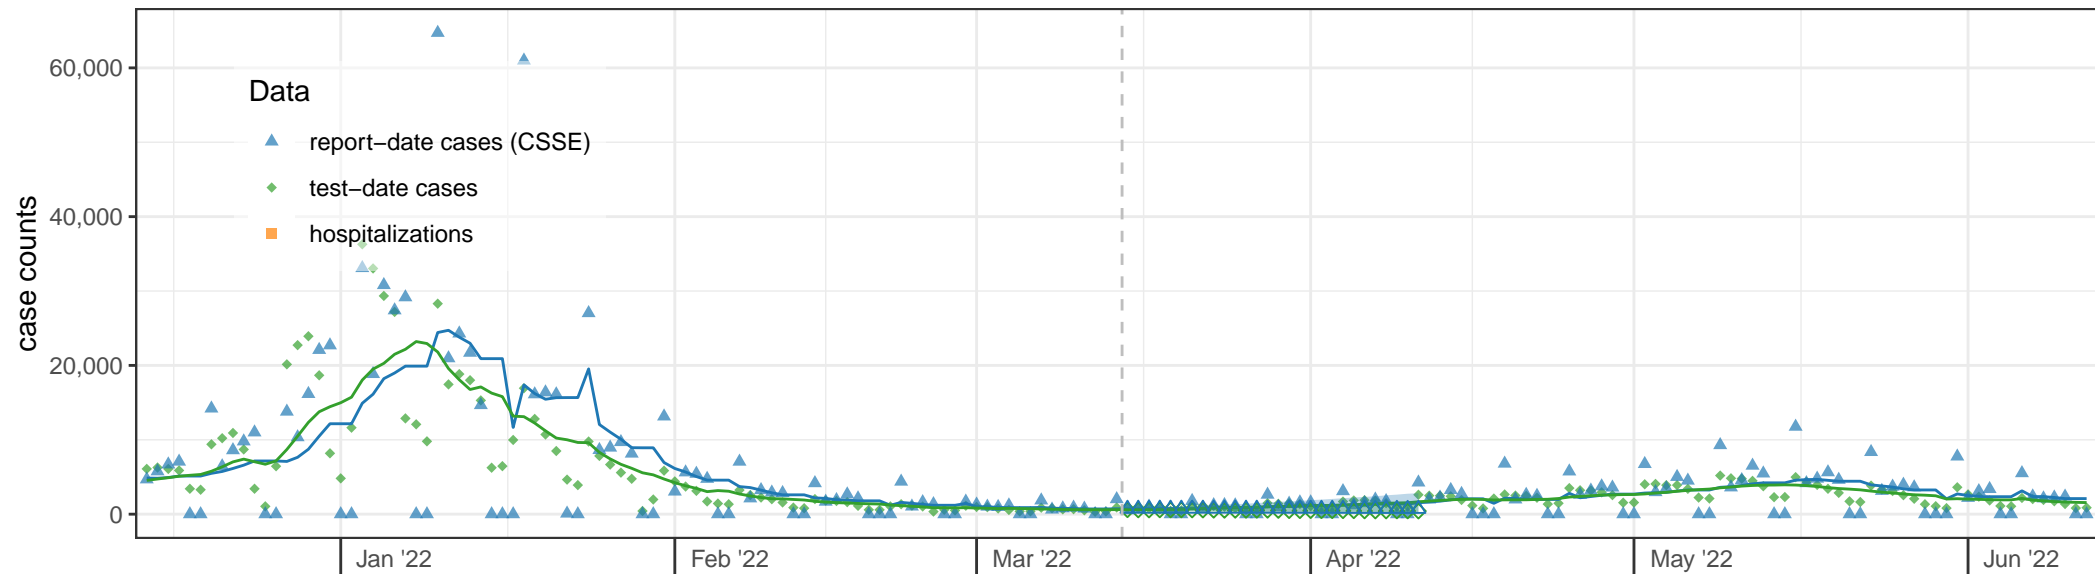

Massachusetts hospitalization data and forecasts: 2022-03-14

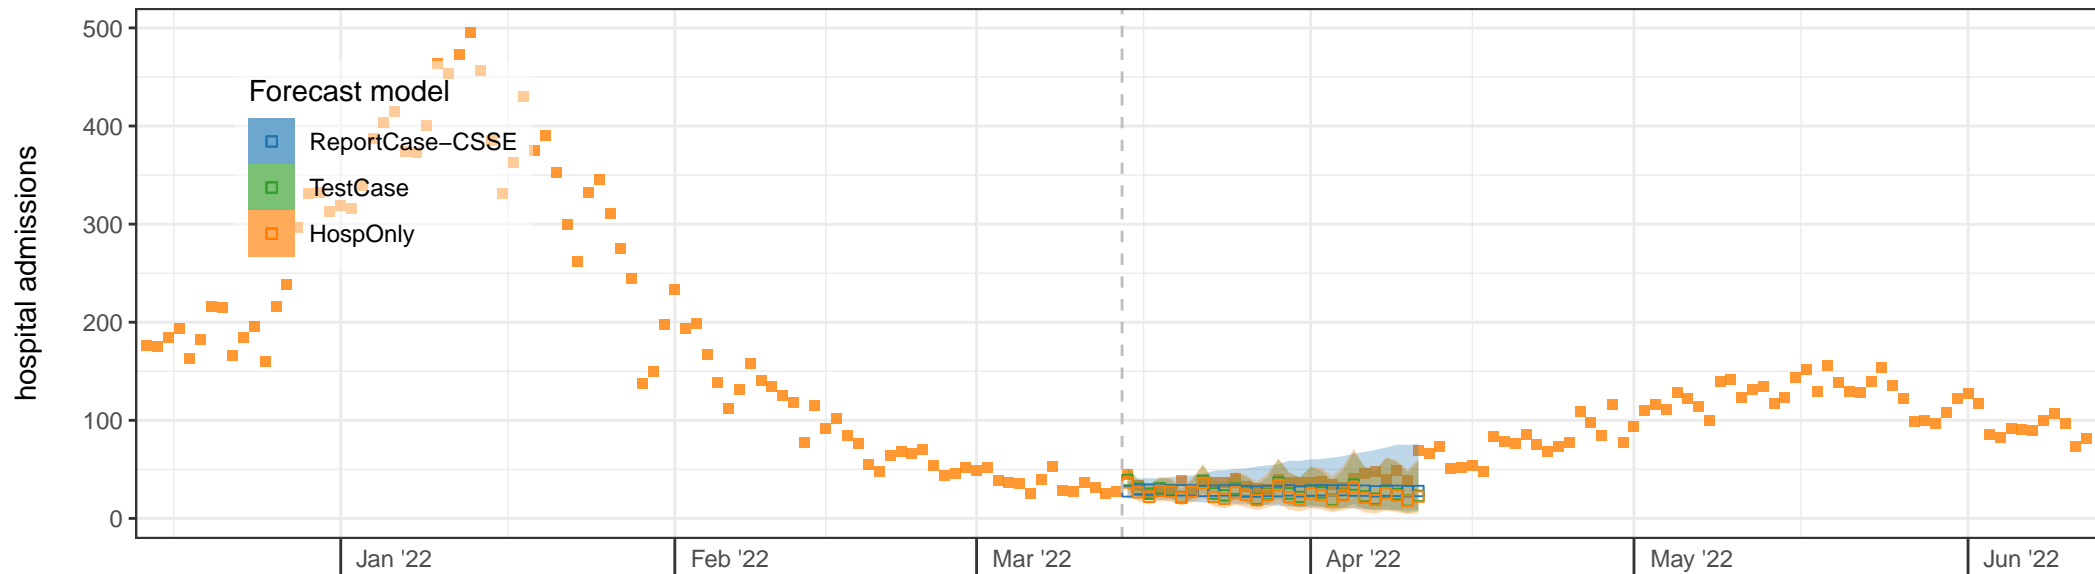

Massachusetts case data and forecasts: 2022-03-21

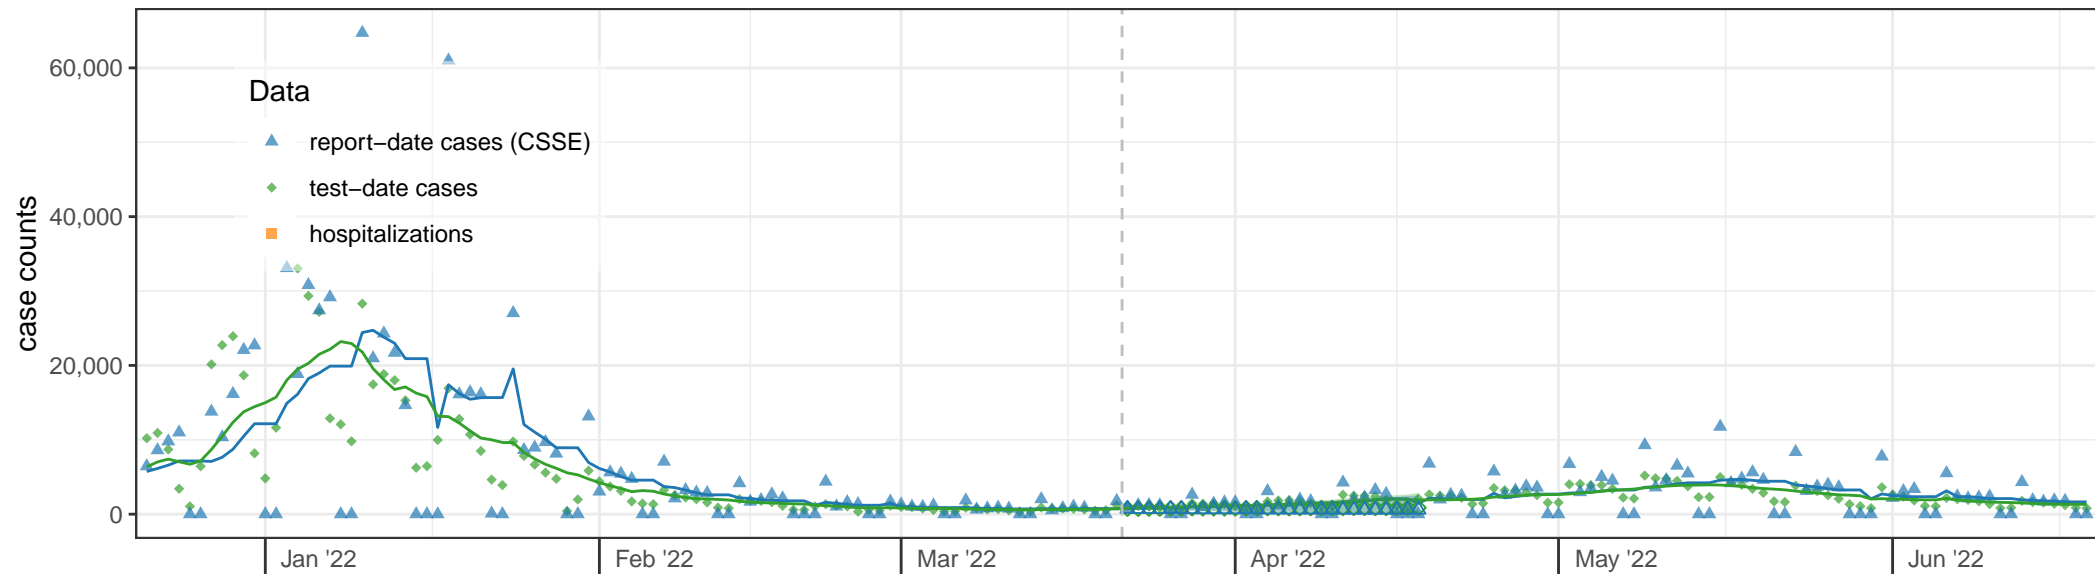

Massachusetts hospitalization data and forecasts: 2022-03-21

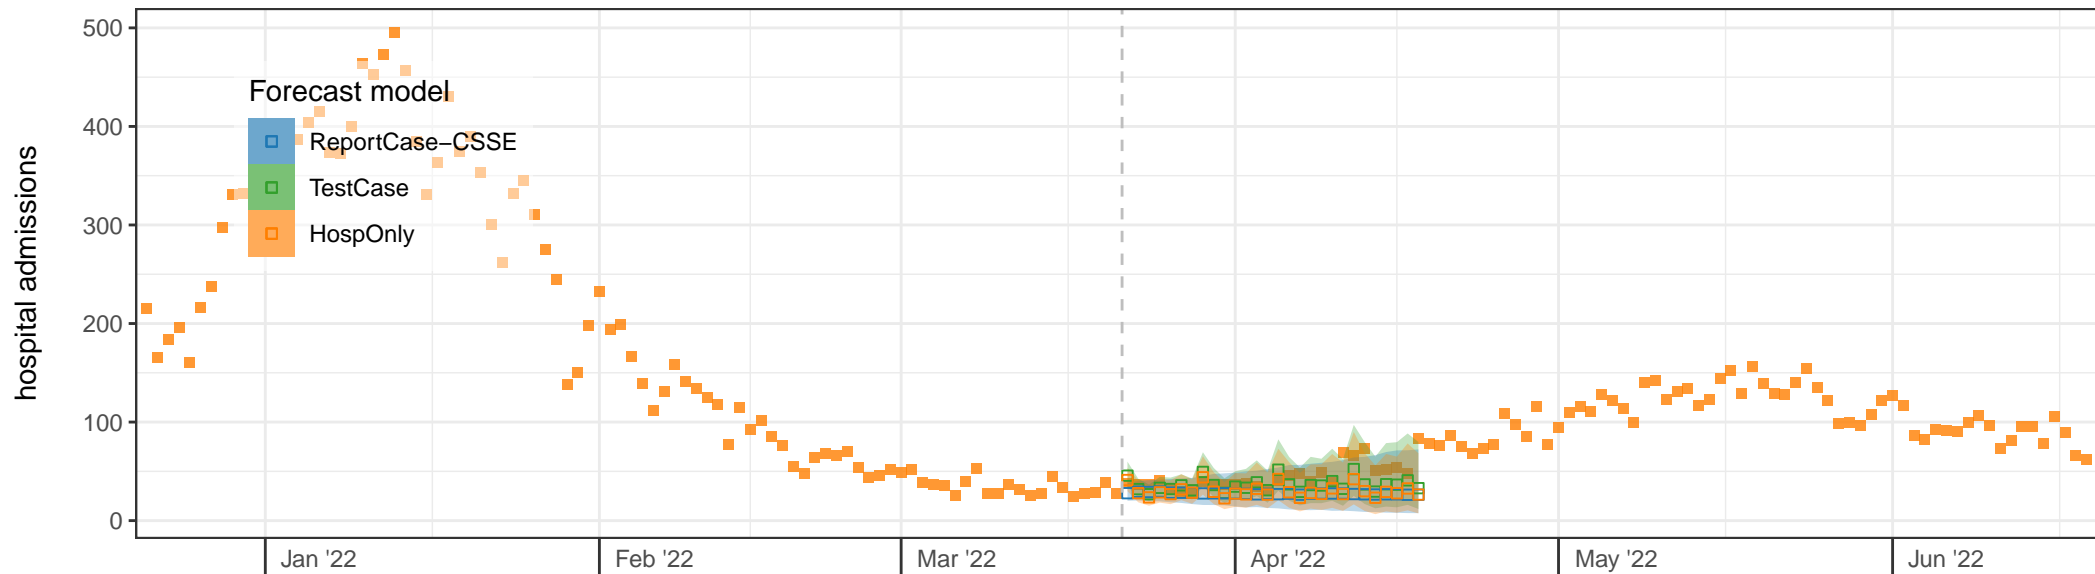

Massachusetts case data and forecasts: 2022-03-28

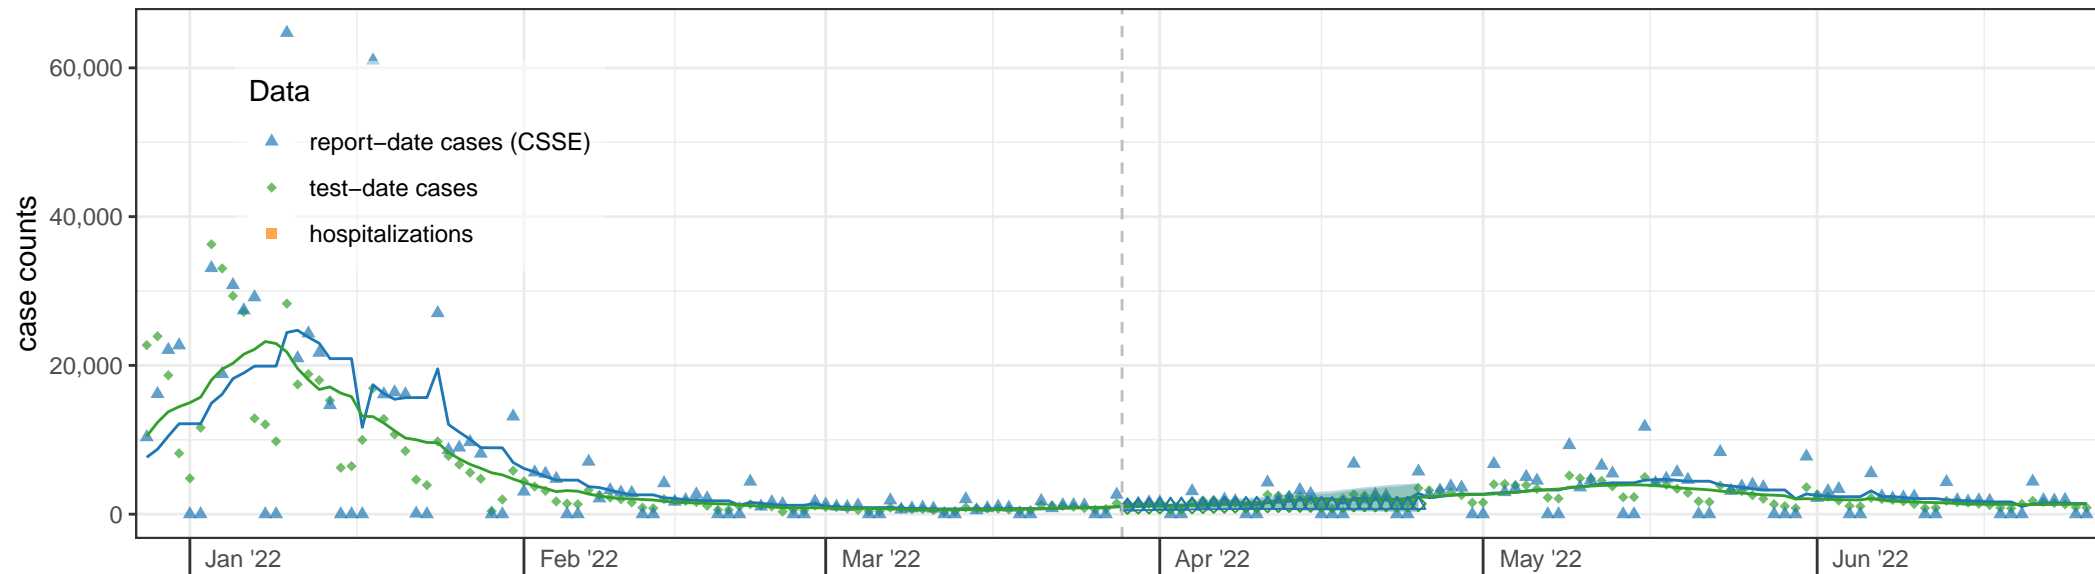

Massachusetts hospitalization data and forecasts: 2022-03-28

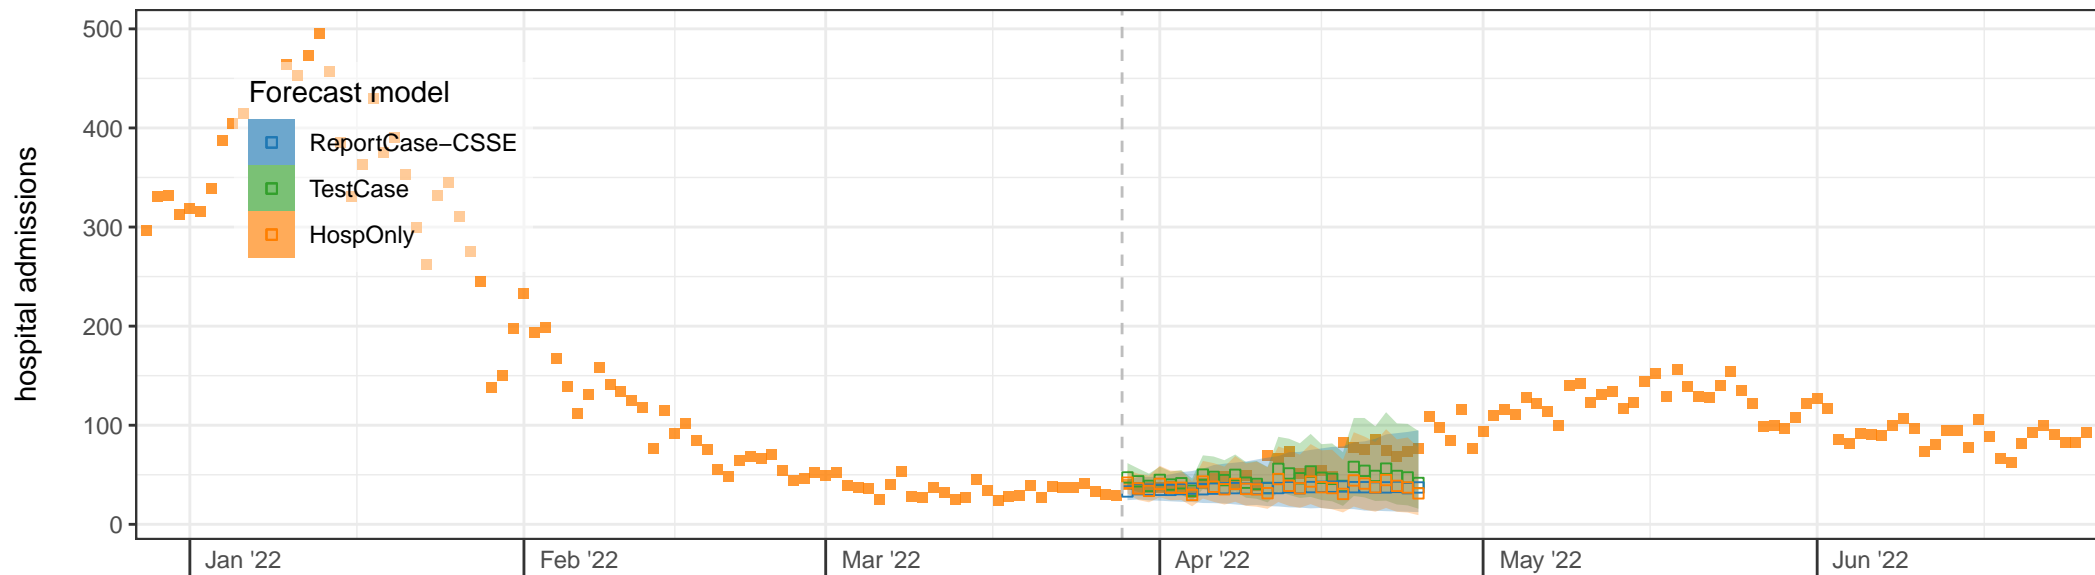

Massachusetts case data and forecasts: 2022-04-04

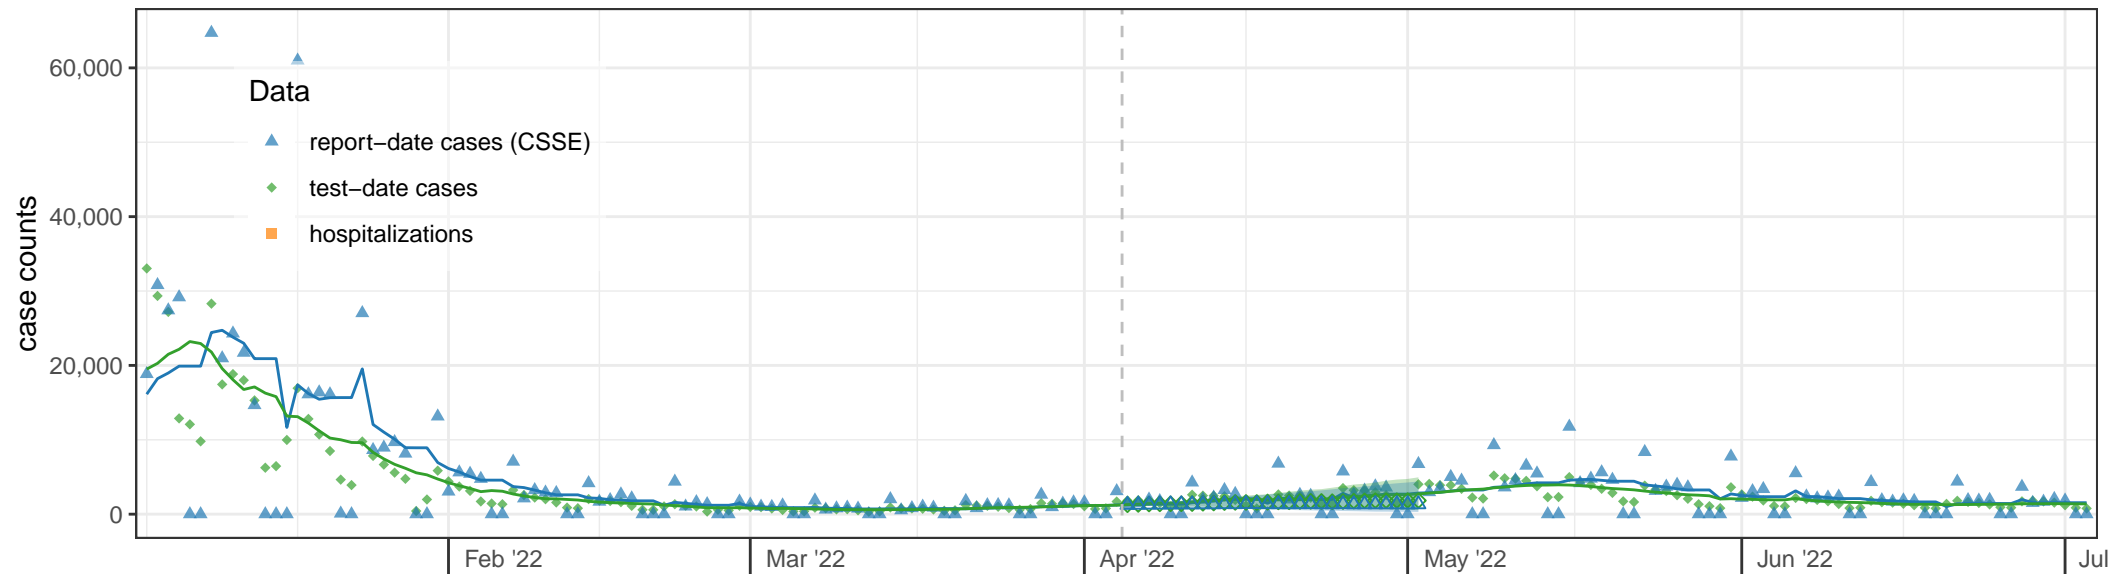

Massachusetts hospitalization data and forecasts: 2022-04-04

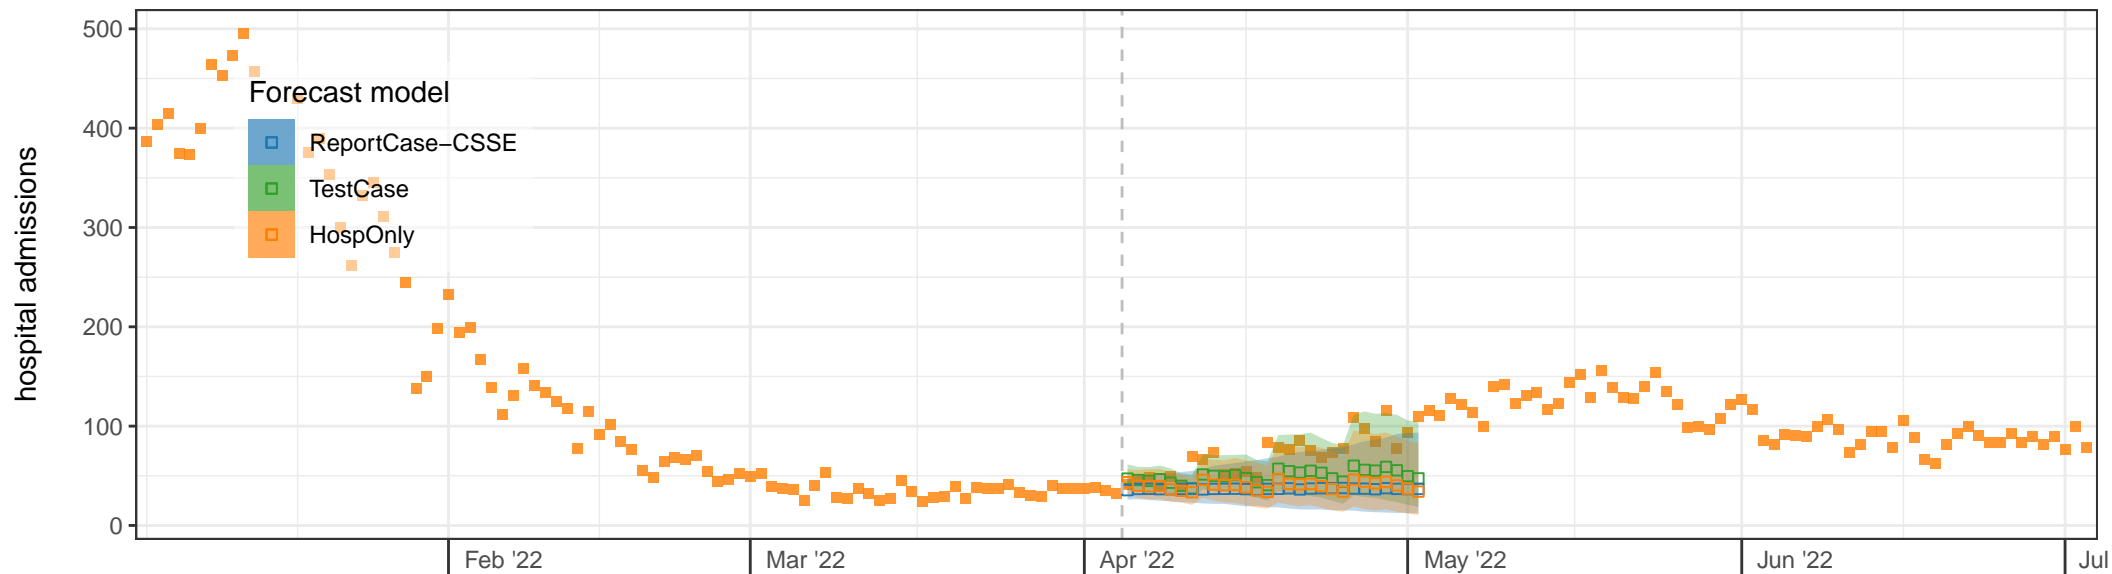

Massachusetts case data and forecasts: 2022-04-11

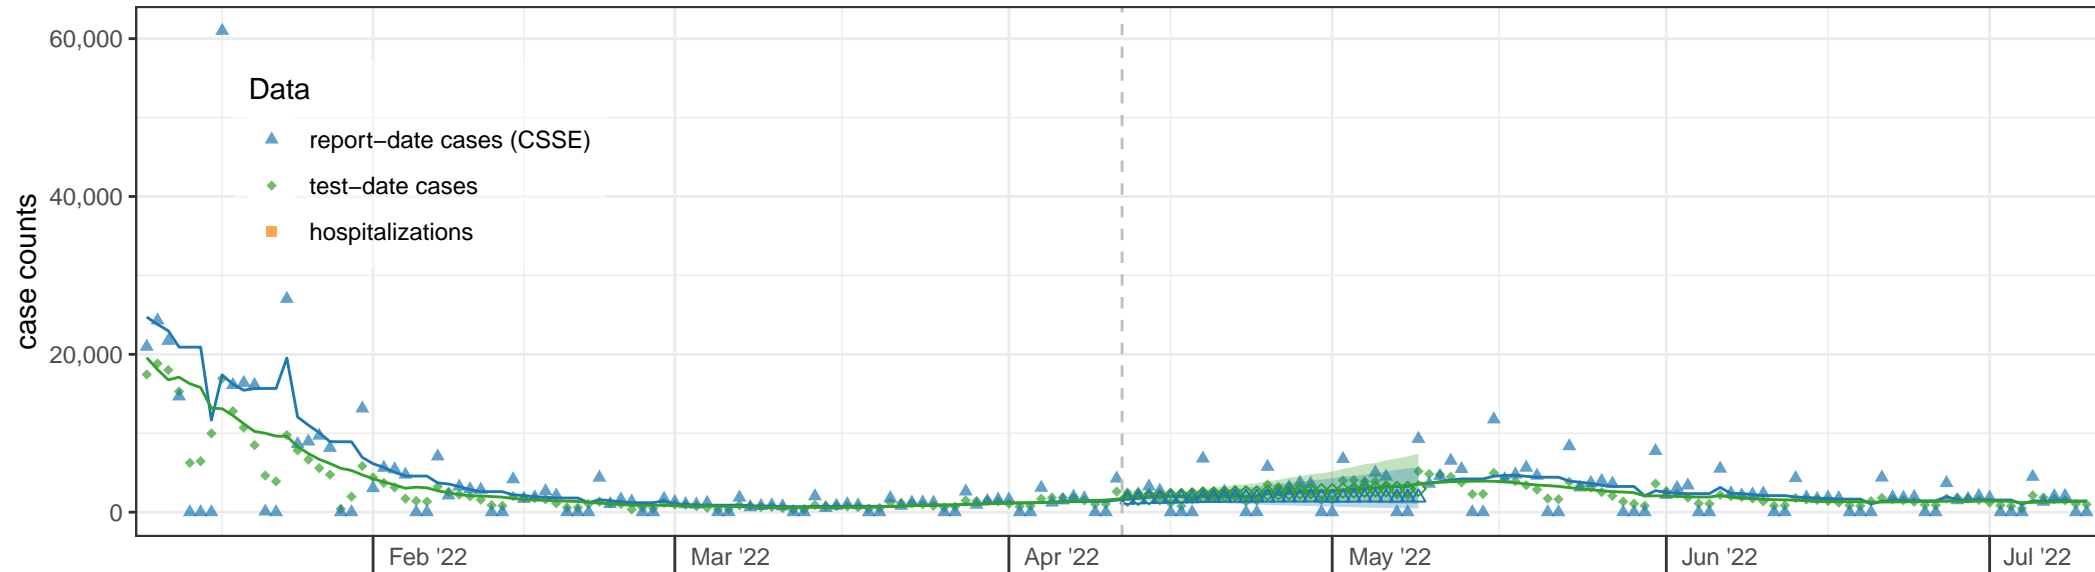

Massachusetts hospitalization data and forecasts: 2022-04-11

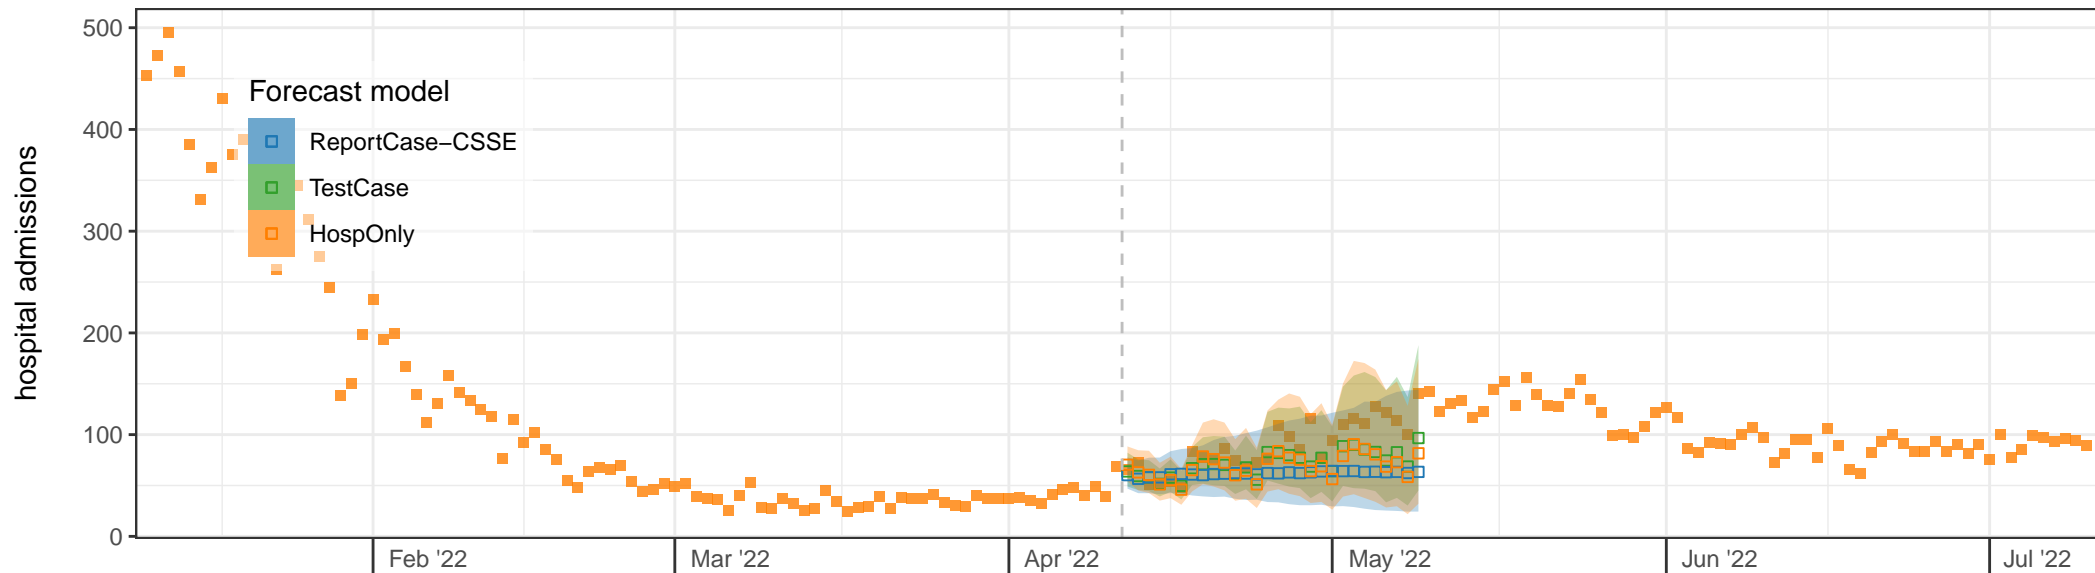

Massachusetts case data and forecasts: 2022-04-18

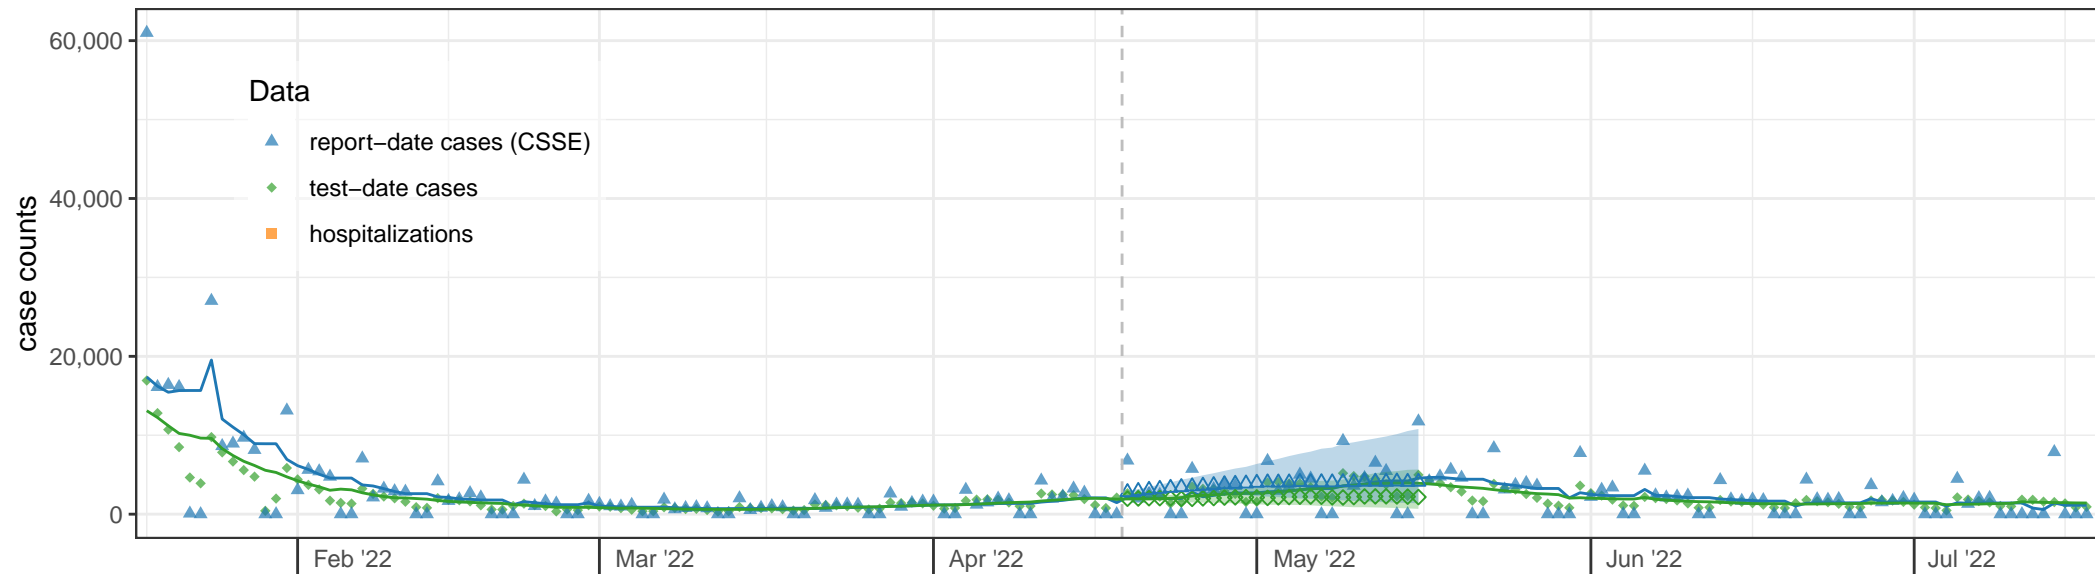

Massachusetts hospitalization data and forecasts: 2022-04-18

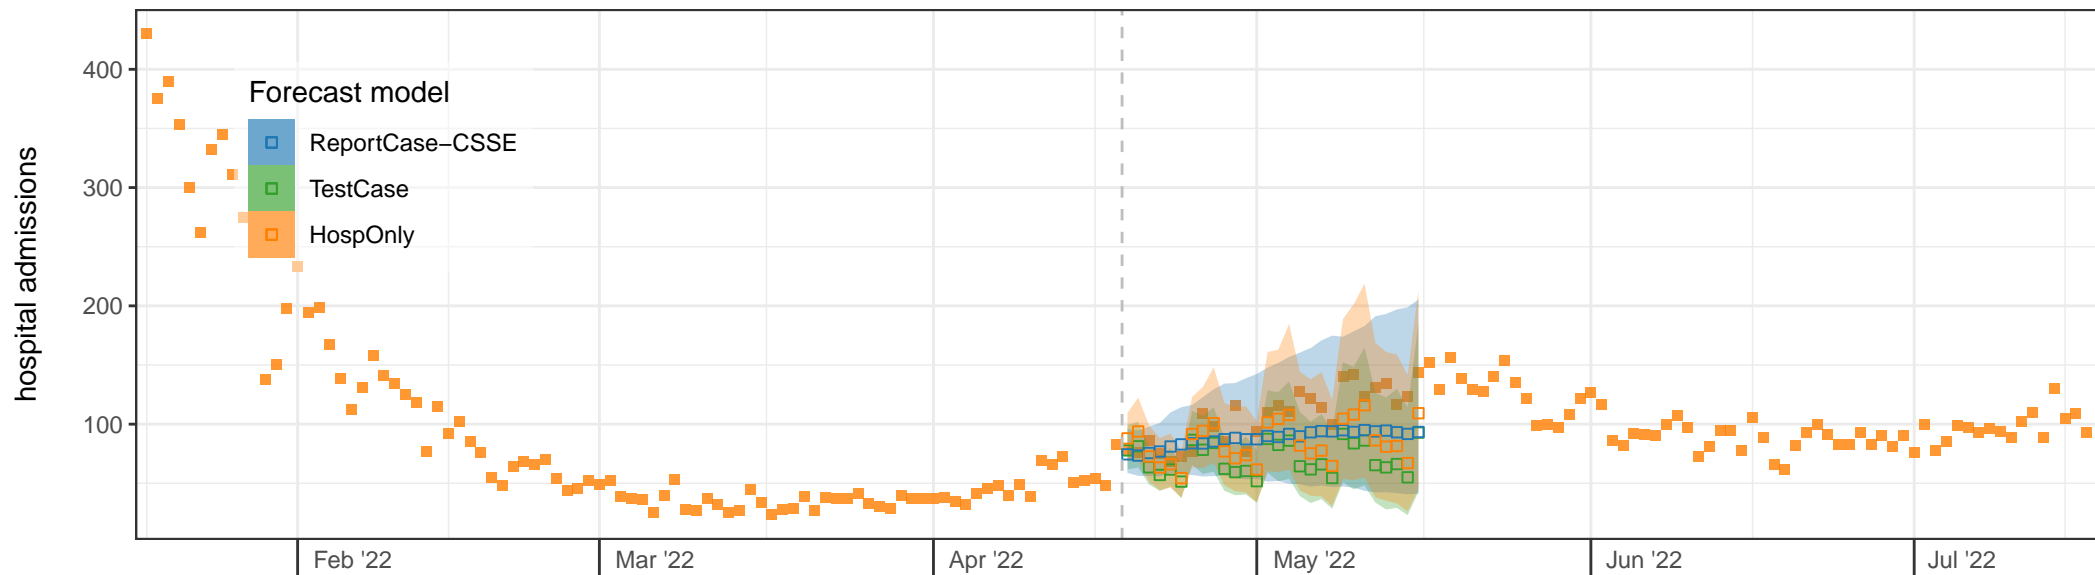

Massachusetts case data and forecasts: 2022-04-25

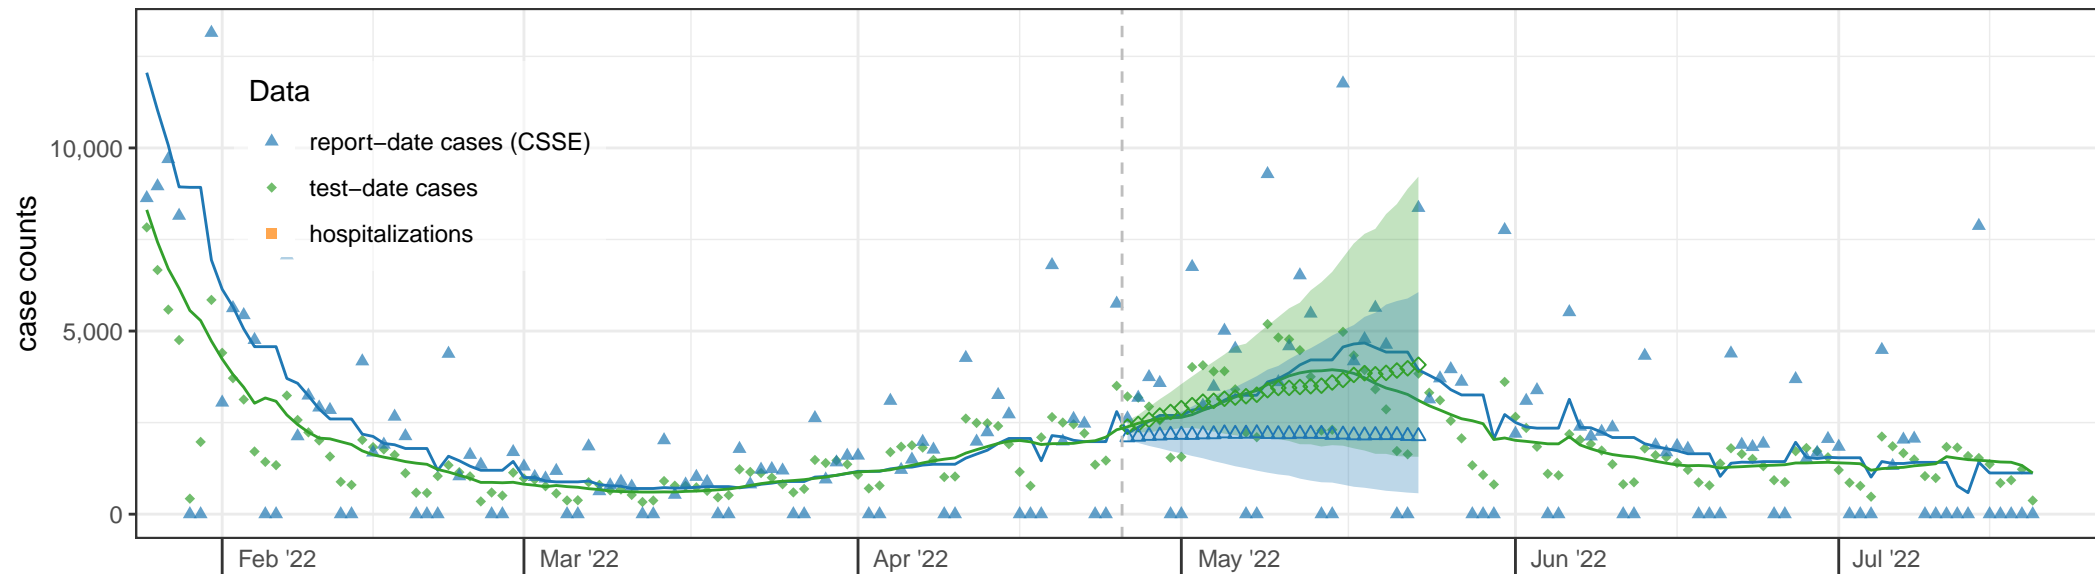

Massachusetts hospitalization data and forecasts: 2022-04-25

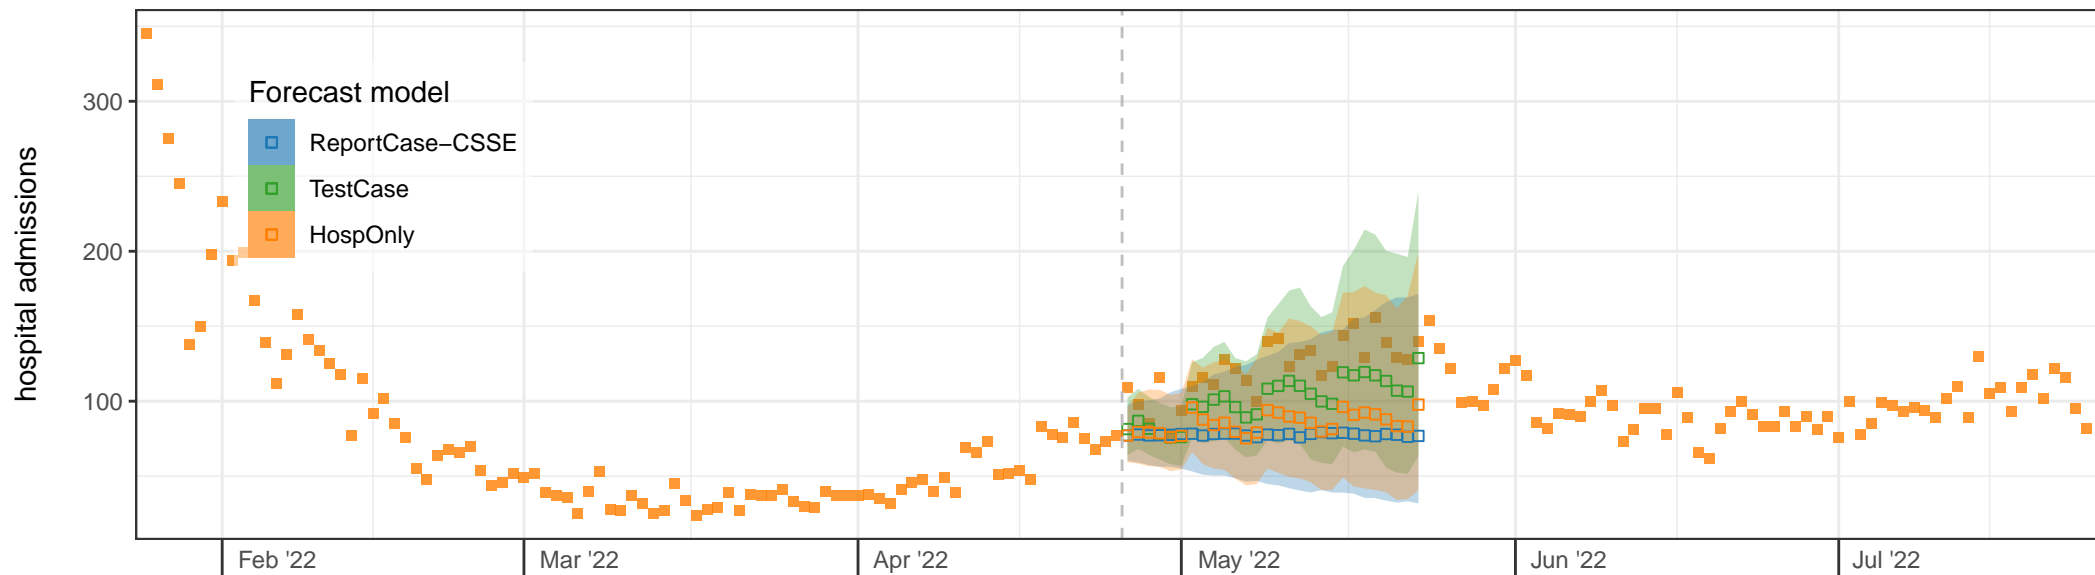

Massachusetts case data and forecasts: 2022-05-02

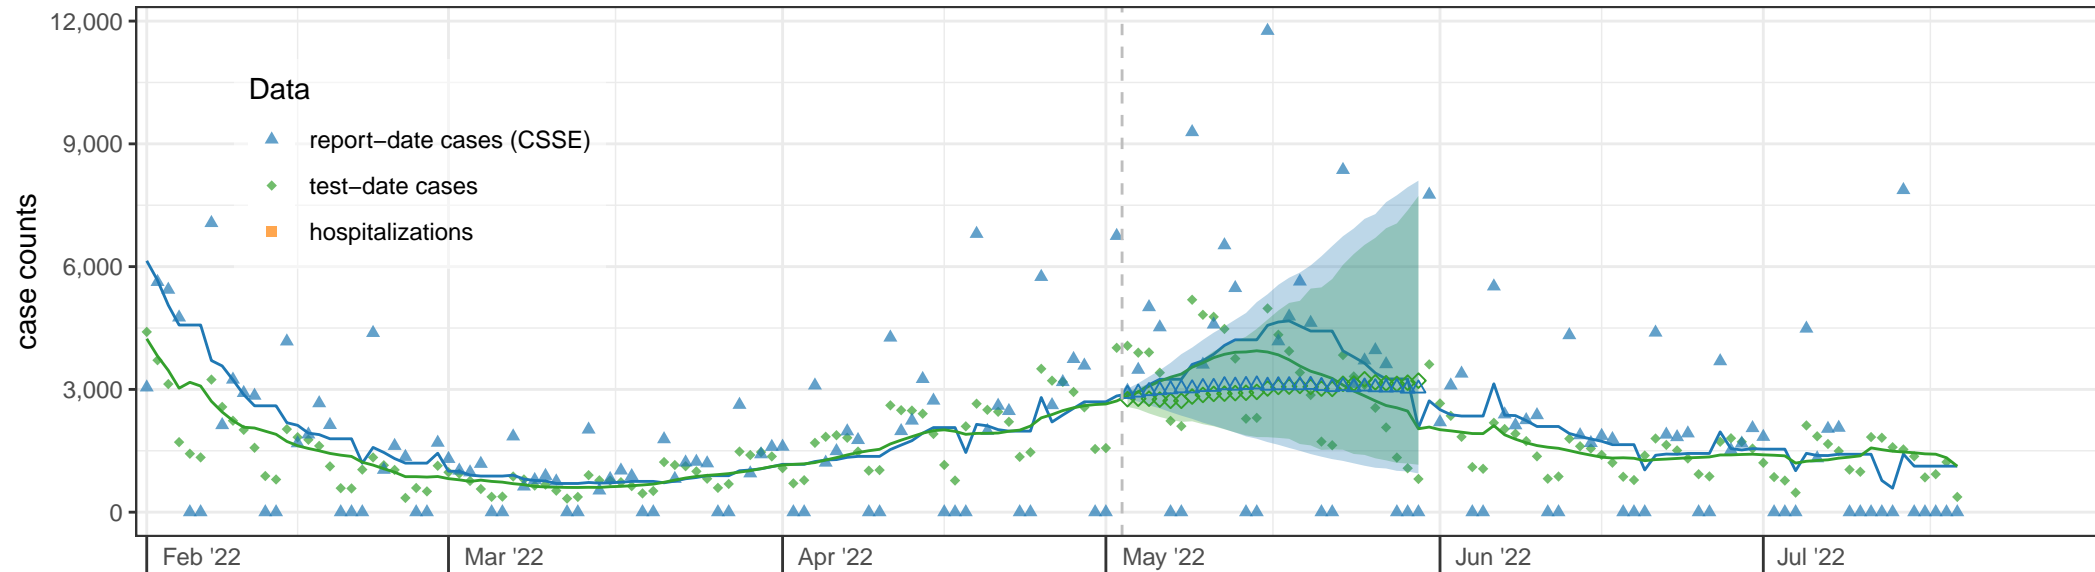

Massachusetts hospitalization data and forecasts: 2022-05-02

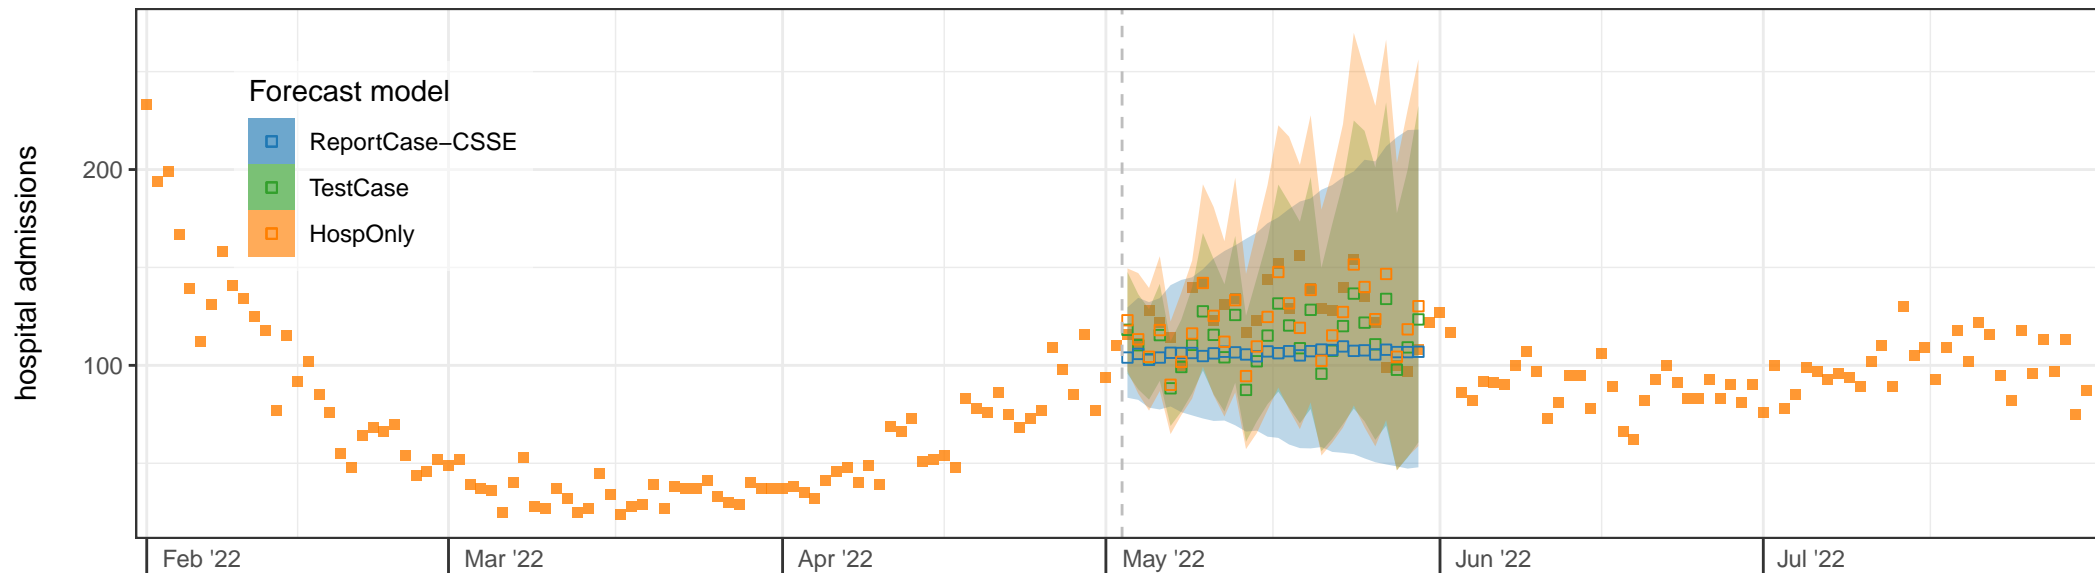



Massachusetts case data and forecasts: 2022-05-09

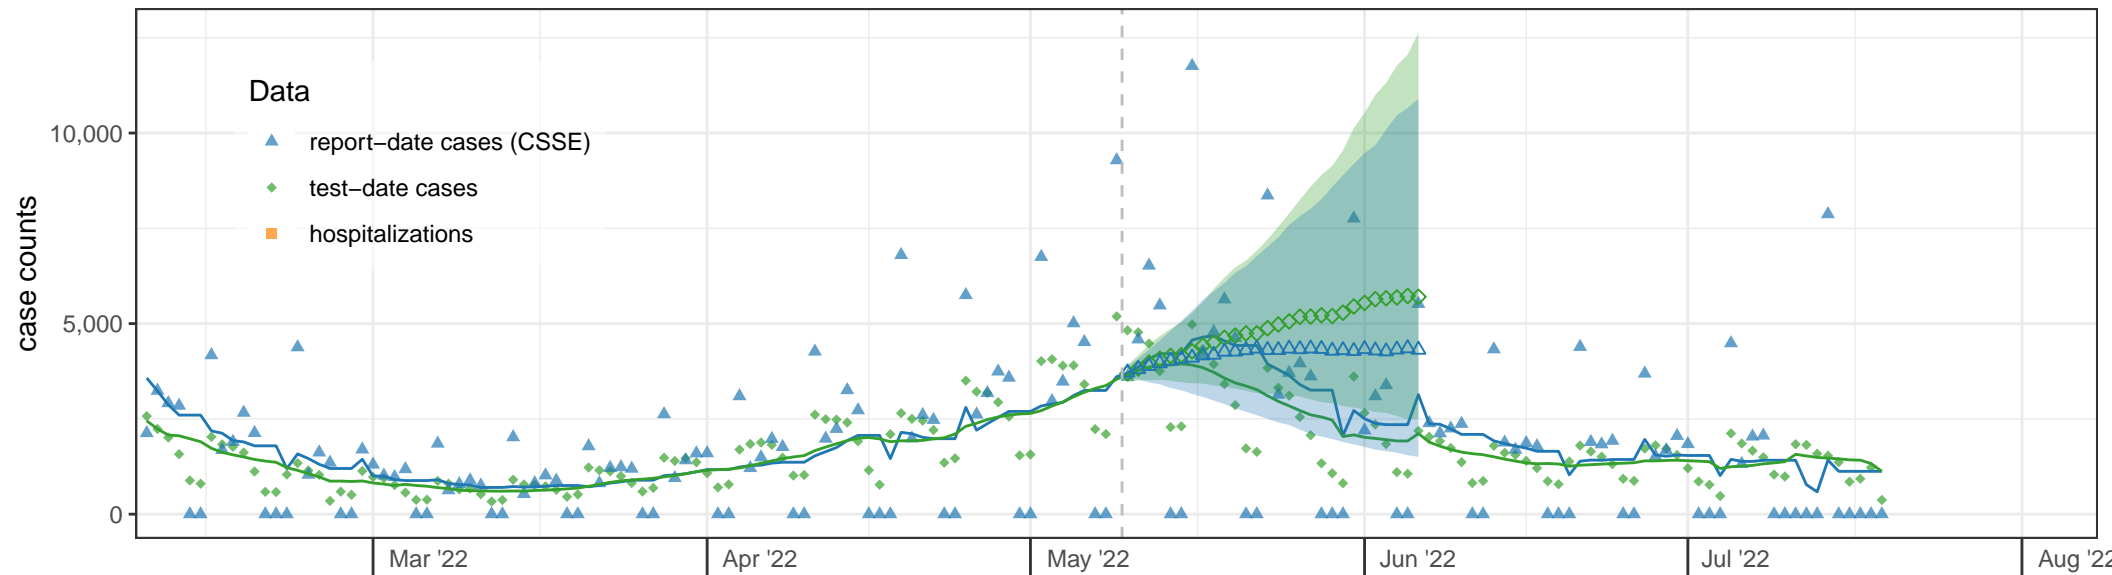

Massachusetts hospitalization data and forecasts: 2022-05-09

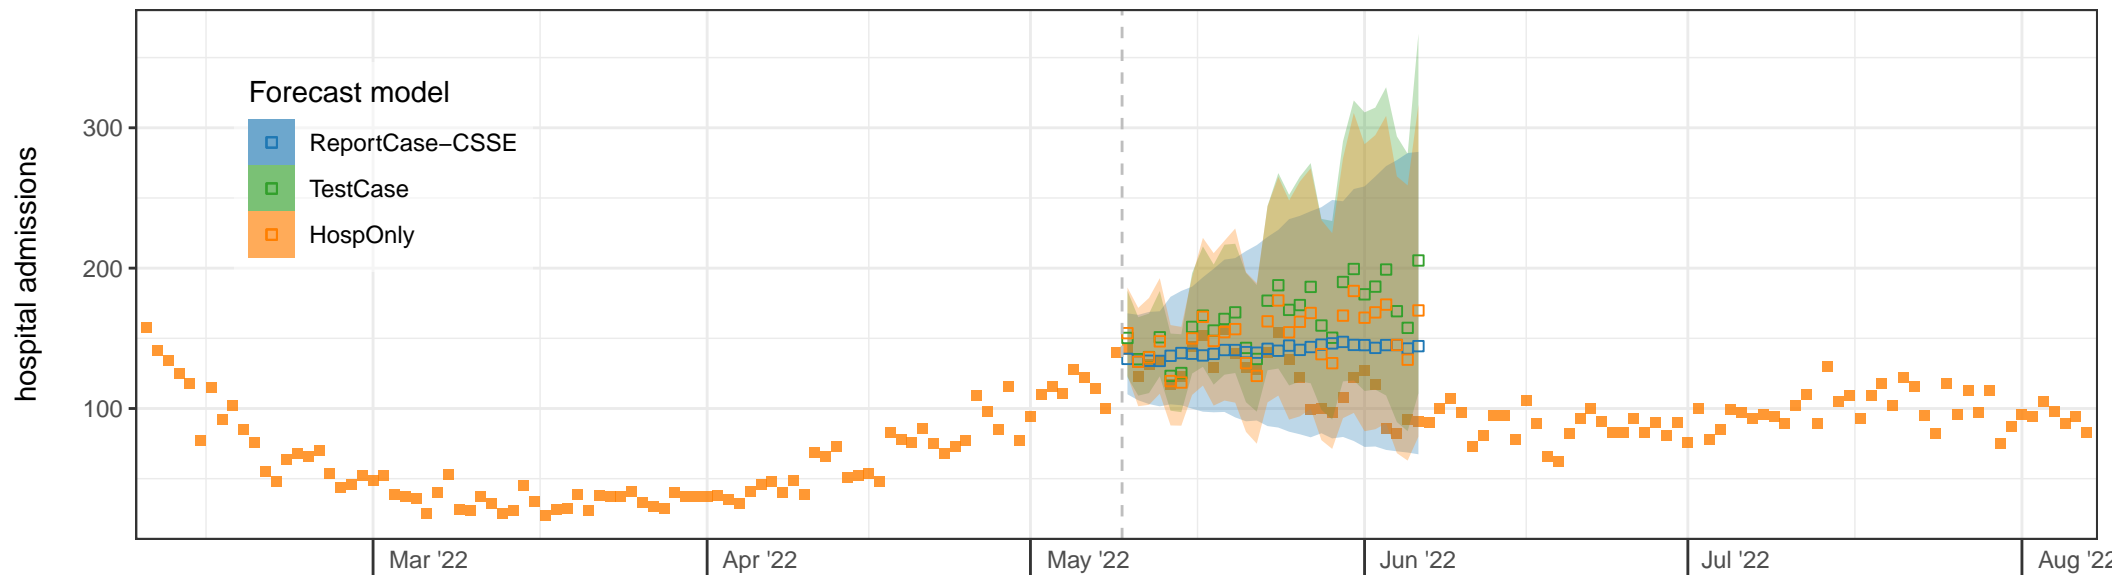

Massachusetts case data and forecasts: 2022-05-16

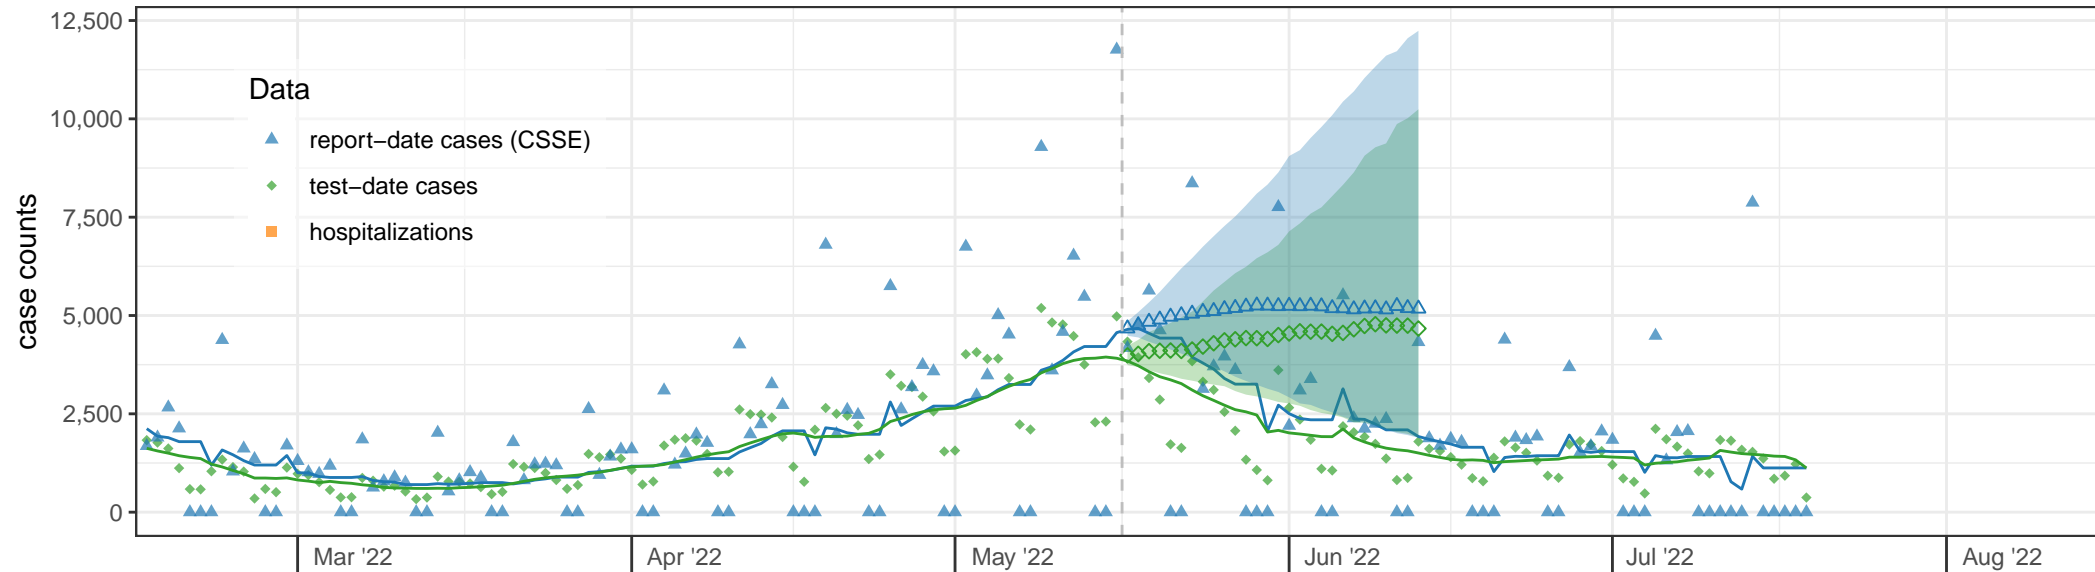

Massachusetts hospitalization data and forecasts: 2022-05-16

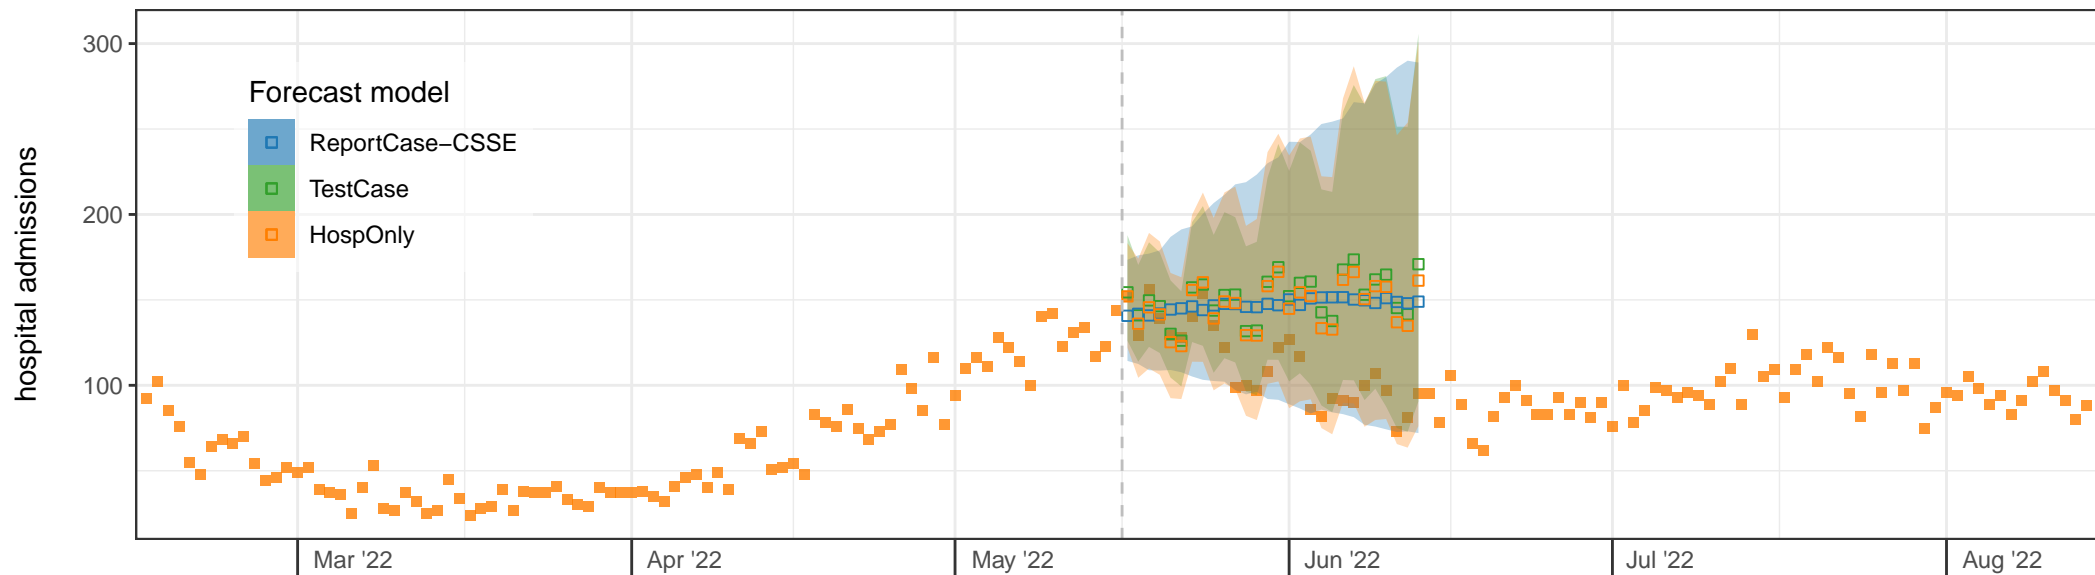

Massachusetts case data and forecasts: 2022-05-23

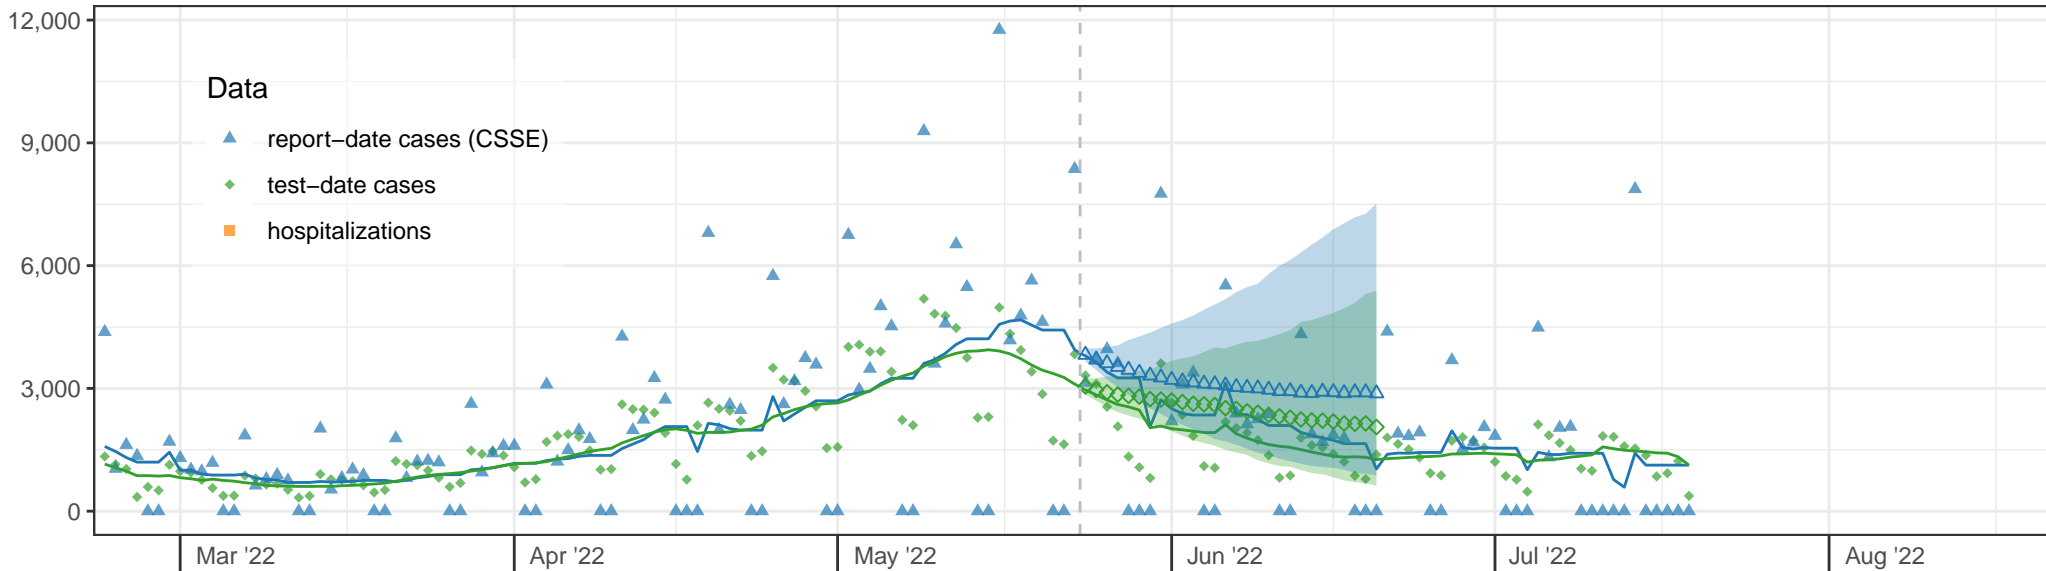

Massachusetts hospitalization data and forecasts: 2022-05-23

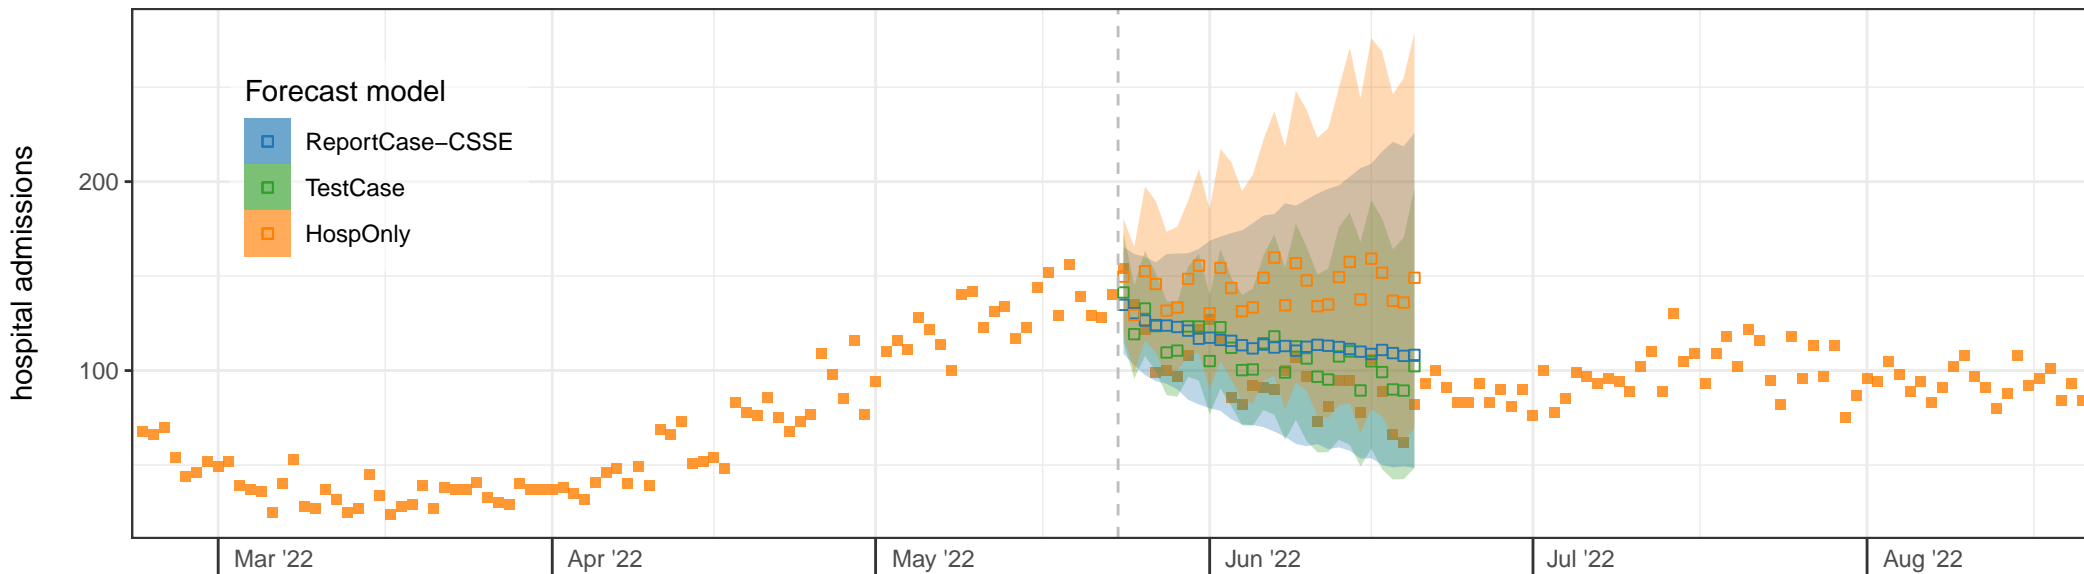

Massachusetts case data and forecasts: 2022-05-30

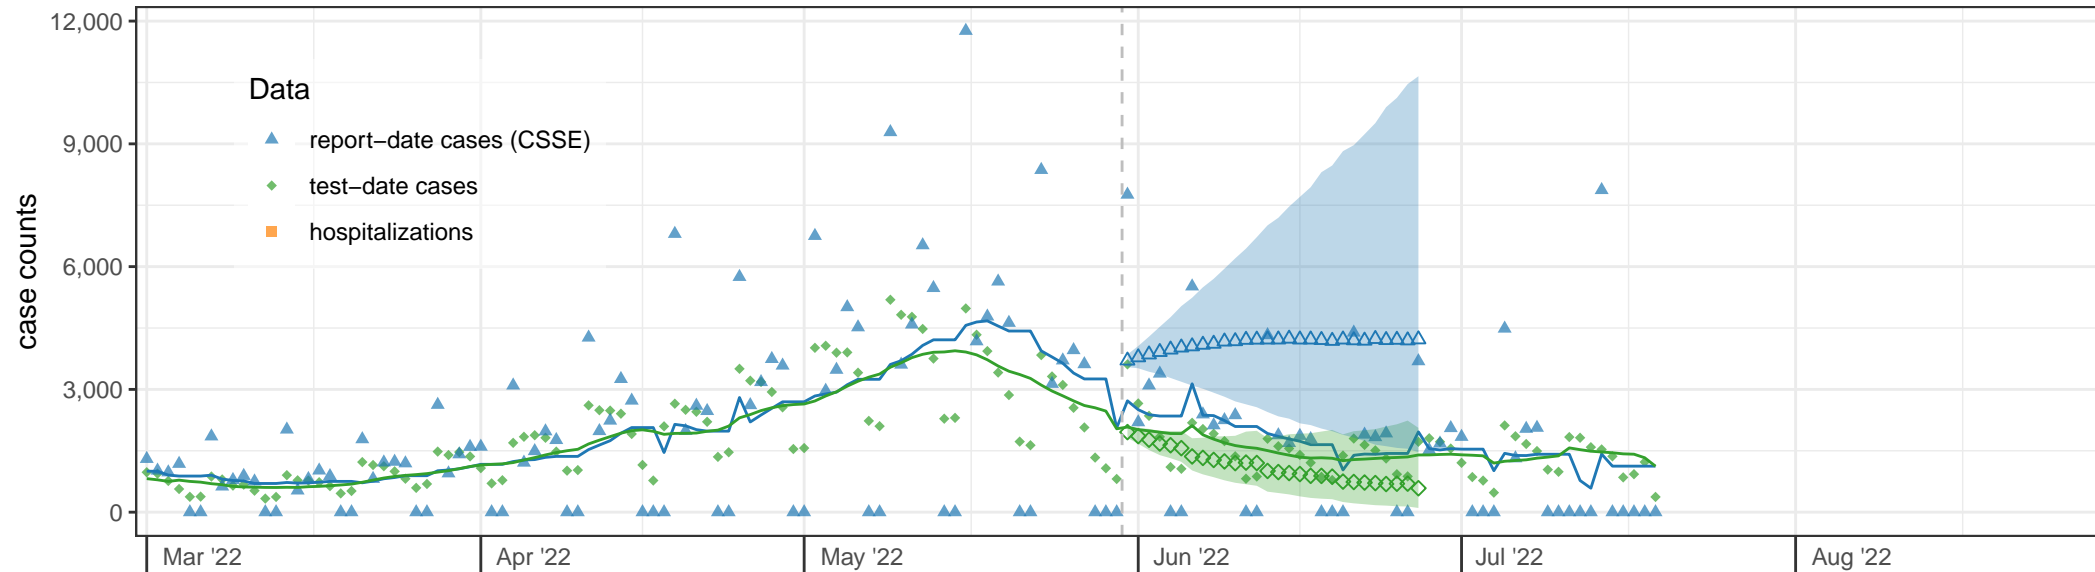

Massachusetts hospitalization data and forecasts: 2022-05-30

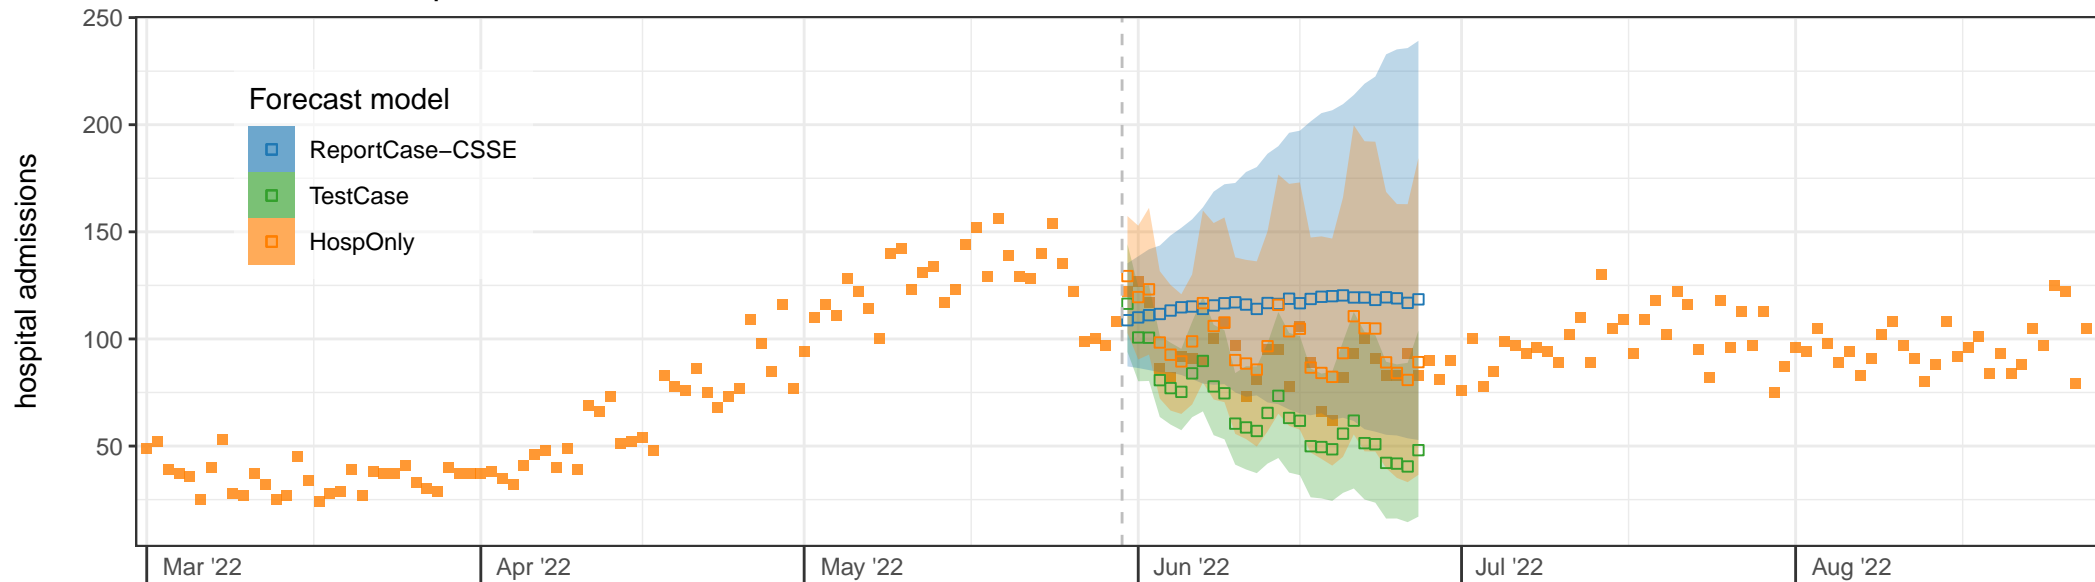

Supplement: Supplementary file [file media-2.pdf]
